# Supplementary material
Source: MDPI journal article supplement (https://www.mdpi.com/1099-4300/15/12/5565)
Supplement: s2 [file s2]

Archive with 144 entries (121 files):
- Sources/
- Sources/.DS_Store
- __MACOSX/
- __MACOSX/Sources/
- __MACOSX/Sources/._.DS_Store
- Sources/data/
- Sources/data/Biofuel Use.csv
- Sources/data/Coal Production.csv
- Sources/data/Coal Use.csv
- Sources/data/Natural Gas Production.csv
- Sources/data/Natural Gas Use.csv
- Sources/data/Petroleum Production.csv
- Sources/data/Petroleum Use.csv
- Sources/data/Population.csv
- Sources/data/README.txt
- __MACOSX/Sources/data/
- __MACOSX/Sources/data/._README.txt
- Sources/data/Total Carbon Dioxide Emissions.csv
- Sources/data/Total Energy Production.csv
- Sources/data/Total Energy Use.csv
- Sources/Energy-Inequality-2013-12-22.pdf
- Sources/Energy-Inequality-2013-12-22.tex
- __MACOSX/Sources/._Energy-Inequality-2013-12-22.tex
- Sources/Figure 1/
- Sources/Figure 1/Figure 1.csv
- Sources/Figure 1/figure.r
- Sources/Figure 1/Figure1.pdf
- Sources/Figure 2/
- Sources/Figure 2/Figure2a.pdf
- Sources/Figure 2/Figure2b.pdf
- Sources/Figure 2/Figure_2a.csv
- Sources/Figure 2/Figure_2a.m
- Sources/Figure 2/Figure_2b.csv
- Sources/Figure 2/Figure_2b.m
- Sources/Figure 2/README.txt
- Sources/Figure 3a/
- Sources/Figure 3a/Figure 3a.csv
- Sources/Figure 3a/figure.r
- Sources/Figure 3a/Figure3a.pdf
- Sources/Figure 3b/
- Sources/Figure 3b/Figure3b.pdf
- Sources/Figure 3b/Figure_3b.m
- Sources/Figure 3b/Global_ecpercap.csv
- Sources/Figure 3b/Global_ectot.csv
- Sources/Figure 3b/Global_pop.csv
- Sources/Figure 3b/README.txt
- Sources/Figure 4/
- Sources/Figure 4/Figure4a.pdf
- Sources/Figure 4/Figure4b.pdf
- Sources/Figure 4/Figure_4a.m
- Sources/Figure 4/Figure_4b.csv
- Sources/Figure 4/Figure_4b.m
- Sources/Figure 4/Global_ecpercap.csv
- Sources/Figure 4/Global_ectot.csv
- Sources/Figure 4/Global_pop.csv
- Sources/Figure 4/README.txt
- Sources/Figure 5a/
- Sources/Figure 5a/Figure 5a.csv
- Sources/Figure 5a/figure.r
- Sources/Figure 5a/Figure5a.pdf
- Sources/Figure 5b/
- Sources/Figure 5b/Figure 5b.csv
- Sources/Figure 5b/figure.r
- Sources/Figure 5b/Figure5b.pdf
- Sources/Figure 6a/
- Sources/Figure 6a/Figure 6a.csv
- Sources/Figure 6a/figure.r
- Sources/Figure 6a/Figure6a.pdf
- Sources/Figure 6b/
- Sources/Figure 6b/cepercap.csv
- Sources/Figure 6b/Figure6b.pdf
- Sources/Figure 6b/Figure_6b.m
- Sources/Figure 6b/Global_pop.csv
- Sources/Figure 6b/README.txt
- Sources/Figure 6b/TotalCO2.csv
- Sources/Figure 7/
- Sources/Figure 7/cepercap.csv
- Sources/Figure 7/Figure7a.pdf
- Sources/Figure 7/Figure7b.pdf
- Sources/Figure 7/Figure_7a.m
- Sources/Figure 7/Figure_7b.csv
- Sources/Figure 7/Figure_7b.m
- Sources/Figure 7/Global_pop.csv
- Sources/Figure 7/README.txt
- Sources/Figure 7/TotalCO2.csv
- Sources/Figure 8/
- Sources/Figure 8/Figure 8.csv
- Sources/Figure 8/figure.r
- Sources/Figure 8/Figure8.pdf
- Sources/lib/
- Sources/lib/curve.r
- Sources/lib/eia.r
- Sources/lib/stats.r
- Sources/lib/util.r
- Sources/mdpi.cls
- Sources/Movies/
- Sources/Movies/.DS_Store
- __MACOSX/Sources/Movies/
- __MACOSX/Sources/Movies/._.DS_Store
- Sources/Movies/cepercap.csv
- Sources/Movies/ffmpeg toolbox/
- Sources/Movies/ffmpeg toolbox/ffmpeginfo.m
- Sources/Movies/ffmpeg toolbox/ffmpegpath.m
- Sources/Movies/ffmpeg toolbox/ffmpegpixfmts.m
- Sources/Movies/ffmpeg toolbox/ffmpegsetup.m
- Sources/Movies/ffmpeg toolbox/ffmpegtranscode.m
- Sources/Movies/ffmpeg toolbox/LICENSE.txt
- Sources/Movies/Global_ecpercap.csv
- Sources/Movies/Global_ectot.csv
- Sources/Movies/Global_pop.csv
- Sources/Movies/Lorenz-CO2-movie.m
- Sources/Movies/Lorenz-CO2.mov
- __MACOSX/Sources/Movies/._Lorenz-CO2.mov
- Sources/Movies/Lorenz-CO2.mp4
- __MACOSX/Sources/Movies/._Lorenz-CO2.mp4
- Sources/Movies/Lorenz-Energy-movie.m
- Sources/Movies/Lorenz-Energy.mov
- __MACOSX/Sources/Movies/._Lorenz-Energy.mov
- Sources/Movies/Lorenz-Energy.mp4
- __MACOSX/Sources/Movies/._Lorenz-Energy.mp4
- Sources/Movies/old bad/
- Sources/Movies/old bad/EnergyConsumptionLorenzMov.m
- Sources/Movies/old bad/Lorenz-Energy.mov
- __MACOSX/Sources/Movies/old bad/
- __MACOSX/Sources/Movies/old bad/._Lorenz-Energy.mov
- Sources/Movies/old bad/Lorenz-Energy.mp4
- __MACOSX/Sources/Movies/old bad/._Lorenz-Energy.mp4
- Sources/Movies/README.txt
- Sources/Movies/TotalCO2.csv
- Sources/Raw Data/
- Sources/Raw Data/Dry_Natural_Gas_Consumption_(Quadrillion_Btu).xls
- Sources/Raw Data/Dry_Natural_Gas_Production_(Quadrillion_Btu).xls
- Sources/Raw Data/Population_(Millions).xls
- Sources/Raw Data/README.txt
- Sources/Raw Data/Total_Biofuels_Consumption_(Thousand_Barrels_Per_Day).xls
- Sources/Raw Data/Total_Carbon_Dioxide_Emissions_from_the_Consumption_of_Energy_(Million_Metric_Tons).xls
- Sources/Raw Data/Total_Coal_Consumption_(Thousand_Short_Tons).xls
- Sources/Raw Data/Total_Oil_Supply_(Thousand_Barrels_Per_Day).xls
- Sources/Raw Data/Total_Petroleum_Consumption_(Quadrillion_Btu).xls
- Sources/Raw Data/Total_Primary_Coal_Production_(Quadrillion_Btu).xls
- Sources/Raw Data/Total_Primary_Energy_Consumption_(Quadrillion_Btu).xls
- Sources/Raw Data/Total_Primary_Energy_Production_(Quadrillion_Btu).xls
- Sources/README.txt
- __MACOSX/Sources/._README.txt
