# Supplementary material
Source: MDPI journal article supplement (https://www.mdpi.com/1099-4300/15/12/5565)
Supplement: s2 [file s2 › Sources/data/Biofuel Use.csv]

Region	2000	2001	2002	2003	2004	2005	2006	2007	2008	2009	2010	2011
North America	112.06	118.7162	140.7847	190.13275	237.7285	276.67476	379.94628	494.2271	676.27757	769.07988	890.52516	946.29041
Bermuda	0	0	0	0	0	0	0	0	0	0	0	0
Canada	4.5	4.5	4.5	4.9	4.9	6	5.4	21.6	25.7	27.81	34.2	47
Greenland	0	0	0	0	0	0	0	0	0	0	0	0
Mexico	0	0	0	0	0	0	0	0.1	0.1	0.103	0.4	0.4
Saint Pierre and Miquelon	0	0	0	0	0	0	0	0	0	0	0	0
United States	107.56	114.2162	136.2847	185.23275	232.8285	270.67476	374.54628	472.5271	650.47757	741.16688	855.92516	898.89041
Central & South America	168.09489	142.59798	161.38807	145.33577	178.31824	184.3888	201.67622	275.60815	364.37384	438.07631	455.46696	422.92006
Antarctica	0	0	0	0	0	0	0	0	0	0	0	0
Antigua and Barbuda	0	0	0	0	0	0	0	0	0	0	0	0
Argentina	0.1	0.2	0.2	0.2	0.2	0.3	0.3	0.3	0.3	0.55	11.9	17.65
Aruba	0	0	0	0	0	0	0	0	0	0	0	0
Bahamas, The	0	0	0	0	0	0	0	0	0	0	0	0
Barbados	0	0	0	0	0	0	0.0003	0.0003	0.001	0.001	0.001	0.001
Belize	0	0	0	0	0	0	0	0	0	0	0	0
Bolivia	0	0	0	0	0	0	0	0	0	0	0	0
Brazil	166.85489	141.37798	160.16807	144.01577	177.11824	181.9578	195.22592	268.47785	355.65284	420.26531	424.33586	377.41906
Cayman Islands	0	0	0	0	0	0	0	0	0	0	0	0
Chile	0	0	0	0	0	0	0	0	0	0	0	0
Colombia	0	0	0	0	0	0.5	4.6	4.8	5.8	11.3	12	15
Costa Rica	0	0	0	0	0	0	0	0.05	0.05	0.5	0.5	0.4
Cuba	1.1	1	1	1.1	1	1	0.7	0.4	0.3	0.3	0.3	0.3
Dominica	0	0	0	0	0	0	0	0	0	0	0	0
Dominican Republic	0	0	0	0	0	0	0	0	0	0	0	0
Ecuador	0	0	0	0	0	0	0	0	0	0	0.2	0.1
El Salvador	0	0	0	0	0	0	0	0	0	0	0	0
Falkland Islands (Islas Malvinas)	0	0	0	0	0	0	0	0	0	0	0	0
French Guiana	0	0	0	0	0	0	0	0	0	0	0	0
Grenada	0	0	0	0	0	0	0	0	0	0	0	0
Guadeloupe	0	0	0	0	0	0	0	0	0	0	0	0
Guatemala	0	0	0	0	0	0	0	0	0	0.01	0.01	0.02
Guyana	0	0	0	0	0	0	0	0	0	0	0	0
Haiti	0	0	0	0	0	0	0	0	0	0	0	0
Honduras	0	0	0	0	0	0.001	0.01	0.02	0.02	0.01	0.02	0.01
Jamaica	0	0	0	0	0	0	0	0	0.1	1	1	2
Martinique	0	0	0	0	0	0	0	0	0	0	0	0
Montserrat	0	0	0	0	0	0	0	0	0	0	0	0
Netherlands Antilles	0	0	0	0	0	0	0	0	0	0	0	0
Nicaragua	0	0	0	0	0	0	0	0	0	0	0	0
Panama	0	0	0	0	0	0	0	0	0	0	0	0
Paraguay	0.04	0.02	0.02	0.02	0	0.6	0.8	1.1	1.6	2	2.4	2.62
Peru	0	0	0	0	0	0	0	0.4	0.5	2	2.5	5
Puerto Rico	0	0	0	0	0	0	0	0	0	0	0	0
Saint Kitts and Nevis	0	0	0	0	0	0	0	0	0	0	0	0
Saint Lucia	0	0	0	0	0	0	0	0	0	0	0	0
Saint Vincent/Grenadines	0	0	0	0	0	0	0	0	0	0	0	0
Suriname	0	0	0	0	0	0	0	0	0	0	0	0
Trinidad and Tobago	0	0	0	0	0	0	0	0	0	0	0.0001	2
Turks and Caicos Islands	0	0	0	0	0	0	0	0	0	0	0	0
Uruguay	0	0	0	0	0	0.03	0.04	0.06	0.05	0.14	0.3	0.4
Venezuela	0	0	0	0	0	0	0	0	0	0	0	0
Virgin Islands, U.S.	0	0	0	0	0	0	0	0	0	0	0	0
Virgin Islands, British	0	0	0	0	0	0	0	0	0	0	0	0
Europe	16.3	18.72	25.76	33.96	48.17	72.5093	123.021	173.386	238.18	292.545	331.215	343.843
Albania	0	0	0	0	0	0	0	0	0	0	0	0
Austria	0.4	0.4	0.5	0.6	1.1	1.7	6.4	7.7	9.7	12.4	12.5	11.6
Belgium	0	0	0	0	0	0	0.02	2	2.3	7.4	8	7.8
Bosnia and Herzegovina	0	0	0	0	0	0	0	0	0	0	0	0
Bulgaria	0	0	0	0	0	0	0.1	0.04	0.08	0.1	0.4	0.2
Croatia	0	0	0	0	0	0	0	0.06	0.04	0.06	0.1	0.1
Cyprus	0	0	0	0	0	0	0	0.02	0.31	0.33	0.33	0.33
Czech Republic	1.4	1	1.4	1.4	0.7	0.1	0.44	0.704	2.8	4.9	5.8	7.3
Denmark	0	0	0	0	0	0	0.1	0.2	0.205	0.3	1.1	5
Faroe Islands	0	0	0	0	0	0	0	0	0	0	0	0
Finland	0	0	0.02	0.1	0.1	0	0.02	0.103	2.4	3.9	4.5	4.7
Former Czechoslovakia	NA	NA	NA	NA	NA	NA	NA	NA	NA	NA	NA	NA
Former Serbia and Montenegro	0	0	0	0	0	0	NA	NA	NA	NA	NA	NA
Former Yugoslavia	NA	NA	NA	NA	NA	NA	NA	NA	NA	NA	NA	NA
France	8	7.86	8.32	7.57	8.18	9.52	18.4	34.3	54.6	59	55	56.5
Germany	4.9	6.8	10.8	15.7	21.9	40.7	67	74	66	68	75.5	73.9
Germany, East	NA	NA	NA	NA	NA	NA	NA	NA	NA	NA	NA	NA
Germany, West	NA	NA	NA	NA	NA	NA	NA	NA	NA	NA	NA	NA
Gibraltar	0	0	0	0	0	0	0	0	0	0	0	0
Greece	0	0	0	0	0	0.06	1	1.9	1.5	1.7	2.8	2.3
Hungary	0	0	0	0	0	0.1	0.407	0.94	4.2	4.3	4.6	4.2
Iceland	0	0	0	0	0	0	0	0	0.005	0.005	0.005	0.003
Ireland	0	0	0	0	0	0.0203	0.06	0.6	1.4	2	2.3	2.5
Italy	0	0	0	0	5.6	4.1	4.6	4.2	16	27.3	35.2	35.9
Luxembourg	0	0	0	0	0	0.01	0.01	0.73	0.83	0.92	0.92	1
Macedonia	0	0	0	0	0	0	0	0	0.01	0.01	0.01	0.01
Malta	0	0	0	0	0	0.016	0.018	0.039	0.02	0.01	0	0
Montenegro	NA	NA	NA	NA	NA	NA	0	0	0	0	0	0
Netherlands	0	0	0	0.07	0.07	0.05	1.09	7.8	7.57	9.8	6.6	8.8
Norway	0	0	0	0	0.1	0.1	0.1	0.68	1.88	2.2	2.7	2.6
Poland	0	0	0	1	0.5	1.3	2.6	2.5	11	13	18	20
Portugal	0	0	0	0	0	0.003	1.6	3	2.8	5	7	7
Romania	0	0	0	0	0	0	0.5	0.9	2.6	4.7	6.4	5.2
Serbia	NA	NA	NA	NA	NA	NA	0	0.5	1	1.5	1.5	1.5
Slovakia	0	0.6	0.1	0.04	0.02	0.2	0.94	2	3.1	3.7	4	4.1
Slovenia	0	0	0	0	0	0.11	0.096	0.31	0.57	0.68	1	0.7
Spain	1.6	1.6	3.5	5	5.2	7.2	5.2	9.9	15	25	34	40
Sweden	0	0.46	1.06	2.18	4.2	4.5	6.5	8.4	10.1	10	11	12
Switzerland	0	0	0	0	0.1	0.12	0.22	0.26	0.26	0.13	0.25	0.6
Turkey	0	0	0	0	0	0.5	1.1	1	1.1	0.7	0.7	0.8
United Kingdom	0	0	0.06	0.3	0.4	2.1	4.5	8.6	18.8	23.5	29	27.2
Eurasia	0	0	0	0	0.02	0.235	0.594	1.3914	1.8886	1.98	2.6	3
Armenia	0	0	0	0	0	0	0	0	0	0	0	0
Azerbaijan	0	0	0	0	0	0	0	0	0	0	0	0
Belarus	0	0	0	0	0	0	0	0	0.2	0.5	0.7	0.8
Estonia	0	0	0	0	0	0	0.014	0.0114	0.108	0	0	0
Former U.S.S.R.	NA	NA	NA	NA	NA	NA	NA	NA	NA	NA	NA	NA
Georgia	0	0	0	0	0	0	0	0	0	0	0	0
Kazakhstan	0	0	0	0	0	0	0	0	0	0	0	0
Kyrgyzstan	0	0	0	0	0	0	0	0	0	0	0	0
Latvia	0	0	0	0	0	0.115	0.08	0.06	0.0406	0.18	0.7	1.1
Lithuania	0	0	0	0	0.02	0.12	0.5	1.32	1.54	1.3	1.2	1.1
Moldova	0	0	0	0	0	0	0	0	0	0	0	0
Russia	0	0	0	0	0	0	0	0	0	0	0	0
Tajikistan	0	0	0	0	0	0	0	0	0	0	0	0
Turkmenistan	0	0	0	0	0	0	0	0	0	0	0	0
Ukraine	0	0	0	0	0	0	0	0	0	0	0	0
Uzbekistan	0	0	0	0	0	0	0	0	0	0	0	0
Middle East	0	0	0	0	0	0	0	0.1	0.1	0.1	0.1	0.1
Bahrain	0	0	0	0	0	0	0	0	0	0	0	0
Iran	0	0	0	0	0	0	0	0	0	0	0	0
Iraq	0	0	0	0	0	0	0	0	0	0	0	0
Israel	0	0	0	0	0	0	0	0.1	0.1	0.1	0.1	0.1
Jordan	0	0	0	0	0	0	0	0	0	0	0	0
Kuwait	0	0	0	0	0	0	0	0	0	0	0	0
Lebanon	0	0	0	0	0	0	0	0	0	0	0	0
Oman	0	0	0	0	0	0	0	0	0	0	0	0
Palestinian Territories	0	0	0	0	0	0	0	0	0	0	0	0
Qatar	0	0	0	0	0	0	0	0	0	0	0	0
Saudi Arabia	0	0	0	0	0	0	0	0	0	0	0	0
Syria	0	0	0	0	0	0	0	0	0	0	0	0
United Arab Emirates	0	0	0	0	0	0	0	0	0	0	0	0
Yemen	0	0	0	0	0	0	0	0	0	0	0	0
Africa	0.2	0.2	0.2	0.2	0.2	0.1	0.1	0.4	0.635	0.18	0.23	1.301
Algeria	0	0	0	0	0	0	0	0	0	0	0	0
Angola	0	0	0	0	0	0	0	0	0	0	0	0
Benin	0	0	0	0	0	0	0	0	0	0	0	0
Botswana	0	0	0	0	0	0	0	0	0	0	0	0
Burkina Faso	0	0	0	0	0	0	0	0	0	0	0	0
Burundi	0	0	0	0	0	0	0	0	0	0	0	0
Cameroon	0	0	0	0	0	0	0	0	0	0	0	0
Cape Verde	0	0	0	0	0	0	0	0	0	0	0	0
Central African Republic	0	0	0	0	0	0	0	0	0	0	0	0
Chad	0	0	0	0	0	0	0	0	0	0	0	0
Comoros	0	0	0	0	0	0	0	0	0	0	0	0
Congo (Brazzaville)	0	0	0	0	0	0	0	0	0	0	0	0
Congo (Kinshasa)	0	0	0	0	0	0	0	0	0	0	0	0
Cote dIvoire (IvoryCoast)	0	0	0	0	0	0	0	0	0	0	0	0
Djibouti	0	0	0	0	0	0	0	0	0	0	0	0
Egypt	0	0	0	0	0	0	0	0	0	0	0	0
Equatorial Guinea	0	0	0	0	0	0	0	0	0	0	0	0
Eritrea	0	0	0	0	0	0	0	0	0	0	0	0
Ethiopia	0	0	0	0	0	0	0	0	0.03	0.03	0.05	0.05
Gabon	0	0	0	0	0	0	0	0	0	0	0	0
Gambia, The	0	0	0	0	0	0	0	0	0	0	0	0
Ghana	0	0	0	0	0	0	0	0	0	0	0	0
Guinea	0	0	0	0	0	0	0	0	0	0	0	0
Guinea-Bissau	0	0	0	0	0	0	0	0	0	0	0	0
Kenya	0	0	0	0	0	0	0	0	0	0	0	0
Lesotho	0	0	0	0	0	0	0	0	0	0	0	0
Liberia	0	0	0	0	0	0	0	0	0	0	0	0
Libya	0	0	0	0	0	0	0	0	0	0	0	0
Madagascar	0	0	0	0	0	0	0	0	0	0	0	0
Malawi	0.2	0.2	0.2	0.2	0.2	0.1	0.1	0.1	0.1	0.1	0.1	0.1
Mali	0	0	0	0	0	0	0	0	0	0	0	0
Mauritania	0	0	0	0	0	0	0	0	0	0	0	0
Mauritius	0	0	0	0	0	0	0	0	0	0	0	0
Morocco	0	0	0	0	0	0	0	0	0	0	0	0
Mozambique	0	0	0	0	0	0	0	0	0	0	0	0
Namibia	0	0	0	0	0	0	0	0	0	0	0	0
Niger	0	0	0	0	0	0	0	0	0	0	0	0
Nigeria	0	0	0	0	0	0	0	0.3	0.5	0	0	1
Reunion	0	0	0	0	0	0	0	0	0	0	0	0
Rwanda	0	0	0	0	0	0	0	0	0	0	0.01	0.01
Saint Helena	0	0	0	0	0	0	0	0	0	0	0	0
Sao Tome and Principe	0	0	0	0	0	0	0	0	0	0	0	0
Senegal	0	0	0	0	0	0	0	0	0	0	0	0
Seychelles	0	0	0	0	0	0	0	0	0	0	0	0
Sierra Leone	0	0	0	0	0	0	0	0	0	0	0	0
Somalia	0	0	0	0	0	0	0	0	0	0	0	0
South Africa	0	0	0	0	0	0	0	0	0.005	0.04	0.06	0.13
Sudan and South Sudan	0	0	0	0	0	0	0	0	0	0	0	0
Swaziland	0	0	0	0	0	0	0	0	0	0	0	0
Tanzania	0	0	0	0	0	0	0	0	0	0.01	0.01	0.01
Togo	0	0	0	0	0	0	0	0	0	0	0	0
Tunisia	0	0	0	0	0	0	0	0	0	0	0	0
Uganda	0	0	0	0	0	0	0	0	0	0	0	0
Western Sahara	0	0	0	0	0	0	0	0	0	0	0	0
Zambia	0	0	0	0	0	0	0	0	0	0	0	0
Zimbabwe	0	0	0	0	0	0	0	0	0	0	0	0.001
Asia & Oceania	2.9	3.1	8.32	17.44	21.3	27.88	42.0605	45.79	68.85	83.1501	92.0705	102.3505
Afghanistan	0	0	0	0	0	0	0	0	0	0	0	0
American Samoa	0	0	0	0	0	0	0	0	0	0	0	0
Australia	0	0	0	0	0.1	0.7	1.6	2.2	3.5	5.4	8	9.1
Bangladesh	0	0	0	0	0	0	0	0	0	0	0	0
Bhutan	0	0	0	0	0	0	0	0	0	0	0	0
Brunei	0	0	0	0	0	0	0	0	0	0	0	0
Burma (Myanmar)	0	0	0	0	0	0	0	0	0	0	0	0
Cambodia	0	0	0	0	0	0	0	0	0	0.0001	0.0005	0.0005
China	0	0.1	5.1	13.9	17.3	21.5	32	30.7	39.4	43	43	45
Cook Islands	0	0	0	0	0	0	0	0	0	0	0	0
Fiji	0	0	0	0	0	0	0	0	0	0	0.01	0.03
French Polynesia	0	0	0	0	0	0	0	0	0	0	0	0
Guam	0	0	0	0	0	0	0	0	0	0	0	0
Hawaiian Trade Zone	NA	NA	NA	NA	NA	NA	NA	NA	NA	NA	NA	NA
Hong Kong	0	0	0	0	0	0	0	0	0	0	0.1	0.1
India	2.9	3	3.2	3.3	3.5	3.9	4.5	4.7	5.2	3	3	8
Indonesia	0	0	0	0	0	0.04	0.3	0.6	1.2	2.2	4	5
Japan	0	0	0	0.2	0.2	0.2	0.2005	0.3	0.3	0.7	1.3	2.3
Kiribati	0	0	0	0	0	0	0	0	0	0	0	0
Korea, North	0	0	0	0	0	0	0	0	0	0	0	0
Korea, South	0	0	0.02	0.04	0.1	0.2	0.9	1.7	3.2	5	6.6	6.5
Laos	0	0	0	0	0	0	0	0	0	0	0	0
Macau	0	0	0	0	0	0	0	0	0	0	0	0
Malaysia	0	0	0	0	0	0	0.2	0.7	0.9	0.1	0.1	0.04
Maldives	0	0	0	0	0	0	0	0	0	0	0	0
Mongolia	0	0	0	0	0	0	0	0	0	0	0	0
Nauru	0	0	0	0	0	0	0	0	0	0	0	0
Nepal	0	0	0	0	0	0	0	0	0	0	0	0
New Caledonia	0	0	0	0	0	0	0	0	0	0	0	0
New Zealand	0	0	0	0	0	0	0	0.02	0.12	0.12	0.12	0.14
Niue	0	0	0	0	0	0	0	0	0	0	0	0
Pakistan	0	0	0	0	0	0	0	0	0	0	0.2	0.2
Papua New Guinea	0	0	0	0	0	0	0	0	0	0	0	0
Philippines	0	0	0	0	0	0.04	0.06	0.67	1.2	4	5.4	6.5
Samoa	0	0	0	0	0	0	0	0	0	0	0	0
Singapore	0	0	0	0	0	0	0	0	0	0.03	0.04	0.04
Solomon Islands	0	0	0	0	0	0	0	0	0	0	0	0
Sri Lanka	0	0	0	0	0	0	0	0	0	0	0	0
Taiwan	0	0	0	0	0	0	0	0.1	0.63	1.1	2.1	1.7
Thailand	0	0	0	0	0.1	1.3	2.3	4.1	13.2	18.5	18	17.2
Timor-Leste (East Timor)	NA	NA	NA	0	0	0	0	0	0	0	0	0
Tonga	0	0	0	0	0	0	0	0	0	0	0	0
U.S. Pacific Islands	0	0	0	0	0	0	0	0	0	0	0	0
Vanuatu	0	0	0	0	0	0	0	0	0	0	0	0
Vietnam	0	0	0	0	0	0	0	0	0	0	0.1	0.5
Wake Island	0	0	0	0	0	0	0	0	0	0	0	0
World	299.55489	283.33417	336.45277	387.06853	485.73674	561.78785	747.398	990.90265	1350.30501	1585.11129	1772.20762	1819.80497
