# Supplementary material
Source: MDPI journal article supplement (https://www.mdpi.com/1099-4300/15/12/5565)
Supplement: s2 [file s2 › Sources/data/Coal Production.csv]

Region	1981	1982	1983	1984	1985	1986	1987	1988	1989	1990	1991	1992	1993	1994	1995	1996	1997	1998	1999	2000	2001	2002	2003	2004	2005	2006	2007	2008	2009	2010	2011
Bermuda	0	0	0	0	0	0	0	0	0	0	0	0	0	0	0	0	0	0	0	0	0	0	0	0	0	0	0	0	0	0	0
Canada	0.98039	1.04664	1.0938	1.40155	1.49619	1.41233	1.5013	1.72556	1.73891	1.69799	1.77762	1.62114	1.71099	1.82597	1.89756	1.92001	2.08501	1.98172	1.90749	1.81928	1.62206	1.52703	1.4266	1.51202	1.50191	1.52434	1.6065	1.57307	1.44724	1.57307	1.55934
Greenland	0	0	0	0	0	0	0	0	0	0	0	0	0	0	0	0	0	0	0	0	0	0	0	0	0	0	0	0	0	0	0
Mexico	0.0763	0.09177	0.11654	0.12697	0.13025	0.14109	0.17132	0.15295	0.16432	0.16618	0.1509	0.14015	0.15171	0.15755	0.16368	0.1854	0.20063	0.21063	0.1939	0.21604	0.22485	0.21212	0.18537	0.19083	0.20769	0.22183	0.24166	0.22073	0.2037	0.19516	0.23915
Saint Pierre and Miquelon	0	0	0	0	0	0	0	0	0	0	0	0	0	0	0	0	0	0	0	0	0	0	0	0	0	0	0	0	0	0	0
United States	18.37677	18.63877	17.24667	19.71922	19.32517	19.50947	20.1411	20.73764	21.36018	22.48755	21.63642	21.69413	20.33565	22.20208	22.12955	22.79015	23.30961	24.0452	23.29508	22.73548	23.54708	22.73224	22.09365	22.8521	23.18519	23.78951	23.49274	23.85137	21.62372	22.03823	22.18093
Antarctica	0	0	0	0	0	0	0	0	0	0	0	0	0	0	0	0	0	0	0	0	0	0	0	0	0	0	0	0	0	0	0
Antigua and Barbuda	0	0	0	0	0	0	0	0	0	0	0	0	0	0	0	0	0	0	0	0	0	0	0	0	0	0	0	0	0	0	0
Argentina	0.01067	0.01103	0.01041	0.01088	0.00857	0.0078	0.00799	0.01097	0.01103	0.00594	0.00626	0.00497	0.00411	0.00855	0.0075	0.00764	0.00615	0.0071	0.00825	0.00637	0.00458	0.00237	0.00219	0.00125	0.00061	0.00347	0.0027	0.00228	0.00202	0.0016	0.00199
Aruba	NA	NA	NA	NA	NA	0	0	0	0	0	0	0	0	0	0	0	0	0	0	0	0	0	0	0	0	0	0	0	0	0	0
Bahamas, The	0	0	0	0	0	0	0	0	0	0	0	0	0	0	0	0	0	0	0	0	0	0	0	0	0	0	0	0	0	0	0
Barbados	0	0	0	0	0	0	0	0	0	0	0	0	0	0	0	0	0	0	0	0	0	0	0	0	0	0	0	0	0	0	0
Belize	0	0	0	0	0	0	0	0	0	0	0	0	0	0	0	0	0	0	0	0	0	0	0	0	0	0	0	0	0	0	0
Bolivia	0	0	0	0	0	0	0	0	0	0	0	0	0	0	0	0	0	0	0	0	0	0	0	0	0	0	0	0	0	0	0
Brazil	0.09673	0.1075	0.11297	0.12698	0.12674	0.1209	0.10889	0.11759	0.10221	0.06485	0.073	0.06277	0.06284	0.06852	0.06534	0.06003	0.06958	0.06743	0.06946	0.08694	0.07287	0.06528	0.05992	0.07037	0.07995	0.07481	0.07676	0.0876	0.07472	0.06974	0.0696
Cayman Islands	0	0	0	0	0	0	0	0	0	0	0	0	0	0	0	0	0	0	0	0	0	0	0	0	0	0	0	0	0	0	0
Chile	0.02843	0.02574	0.02714	0.03281	0.03867	0.04097	0.04292	0.05275	0.05338	0.05979	0.06047	0.04453	0.03711	0.03237	0.02797	0.02705	0.02953	0.02662	0.01372	0.01035	0.01629	0.01225	0.01629	0.00659	0.01539	0.01907	0.00687	0.01887	0.01799	0.01751	0.0185
Colombia	0.11158	0.11409	0.13395	0.1711	0.22858	0.27459	0.34724	0.3887	0.47296	0.52807	0.51579	0.56514	0.54754	0.53206	0.60424	0.70577	0.88264	0.91403	0.88703	1.03295	1.17645	1.07059	1.35485	1.45409	1.59954	1.77644	1.89306	1.99055	1.97173	2.01352	2.32368
Costa Rica	0	0	0	0	0	0	0	0	0	0	0	0	0	0	0	0	0	0	0	0	0	0	0	0	0	0	0	0	0	0	0
Cuba	0	0	0	0	0	0	0	0	0	0	0	0	0	0	0	0	0	0	0	0	0	0	0	0	0	0	0	0	0	0	0
Dominica	0	0	0	0	0	0	0	0	0	0	0	0	0	0	0	0	0	0	0	0	0	0	0	0	0	0	0	0	0	0	0
Dominican Republic	0	0	0	0	0	0	0	0	0	0	0	0	0	0	0	0	0	0	0	0	0	0	0	0	0	0	0	0	0	0	0
Ecuador	0	0	0	0	0	0	0	0	0	0	0	0	0	0	0	0	0	0	0	0	0	0	0	0	0	0	0	0	0	0	0
El Salvador	0	0	0	0	0	0	0	0	0	0	0	0	0	0	0	0	0	0	0	0	0	0	0	0	0	0	0	0	0	0	0
Falkland Islands (Islas Malvinas)	0	0	0	0	0	0	0	0	0	0	0	0	0	0	0	0	0	0	0	0	0	0	0	0	0	0	0	0	0	0	0
French Guiana	0	0	0	0	0	0	0	0	0	0	0	0	0	0	0	0	0	0	0	0	0	0	0	0	0	0	0	0	0	0	0
Grenada	0	0	0	0	0	0	0	0	0	0	0	0	0	0	0	0	0	0	0	0	0	0	0	0	0	0	0	0	0	0	0
Guadeloupe	0	0	0	0	0	0	0	0	0	0	0	0	0	0	0	0	0	0	0	0	0	0	0	0	0	0	0	0	0	0	0
Guatemala	0	0	0	0	0	0	0	0	0	0	0	0	0	0	0	0	0	0	0	0	0	0	0	0	0	0	0	0	0	0	0
Guyana	0	0	0	0	0	0	0	0	0	0	0	0	0	0	0	0	0	0	0	0	0	0	0	0	0	0	0	0	0	0	0
Haiti	0	0	0	0	0	0	0	0	0	0	0	0	0	0	0	0	0	0	0	0	0	0	0	0	0	0	0	0	0	0	0
Honduras	0	0	0	0	0	0	0	0	0	0	0	0	0	0	0	0	0	0	0	0	0	0	0	0	0	0	0	0	0	0	0
Jamaica	0	0	0	0	0	0	0	0	0	0	0	0	0	0	0	0	0	0	0	0	0	0	0	0	0	0	0	0	0	0	0
Martinique	0	0	0	0	0	0	0	0	0	0	0	0	0	0	0	0	0	0	0	0	0	0	0	0	0	0	0	0	0	0	0
Montserrat	0	0	0	0	0	0	0	0	0	0	0	0	0	0	0	0	0	0	0	0	0	0	0	0	0	0	0	0	0	0	0
Netherlands Antilles	0	0	0	0	0	0	0	0	0	0	0	0	0	0	0	0	0	0	0	0	0	0	0	0	0	0	0	0	0	0	0
Nicaragua	0	0	0	0	0	0	0	0	0	0	0	0	0	0	0	0	0	0	0	0	0	0	0	0	0	0	0	0	0	0	0
Panama	0	0	0	0	0	0	0	0	0	0	0	0	0	0	0	0	0	0	0	0	0	0	0	0	0	0	0	0	0	0	0
Paraguay	0	0	0	0	0	0	0	0	0	0	0	0	0	0	0	0	0	0	0	0	0	0	0	0	0	0	0	0	0	0	0
Peru	0.00225	0.00176	0.00225	0.00257	0.00319	0.00372	0.00272	0.00302	0.00258	0.00208	0.00122	0.00184	0.00178	0.00135	0.0011	0.00044	0.00064	0.00061	0.00063	0.00049	0.00055	0.00064	0.00046	0.00048	0.00124	0.00299	0.00312	0.00388	0.00424	0.00268	0.00287
Puerto Rico	0	0	0	0	0	0	0	0	0	0	0	0	0	0	0	0	0	0	0	0	0	0	0	0	0	0	0	0	0	0	0
Saint Kitts and Nevis	0	0	0	0	0	0	0	0	0	0	0	0	0	0	0	0	0	0	0	0	0	0	0	0	0	0	0	0	0	0	0
Saint Lucia	0	0	0	0	0	0	0	0	0	0	0	0	0	0	0	0	0	0	0	0	0	0	0	0	0	0	0	0	0	0	0
Saint Vincent/Grenadines	0	0	0	0	0	0	0	0	0	0	0	0	0	0	0	0	0	0	0	0	0	0	0	0	0	0	0	0	0	0	0
Suriname	0	0	0	0	0	0	0	0	0	0	0	0	0	0	0	0	0	0	0	0	0	0	0	0	0	0	0	0	0	0	0
Trinidad and Tobago	0	0	0	0	0	0	0	0	0	0	0	0	0	0	0	0	0	0	0	0	0	0	0	0	0	0	0	0	0	0	0
Turks and Caicos Islands	0	0	0	0	0	0	0	0	0	0	0	0	0	0	0	0	0	0	0	0	0	0	0	0	0	0	0	0	0	0	0
Uruguay	0	0	0	0	0	0	0	0	0	0	0	0	0	0	0	0	0	0	0	0	0	0	0	0	0	0	0	0	0	0	0
Venezuela	0.00132	0.00137	0.001	0.00137	0.00113	0.00153	0.00167	0.02932	0.05716	0.0589	0.05851	0.06458	0.10058	0.11278	0.10715	0.09593	0.15652	0.22677	0.21227	0.23981	0.23071	0.22412	0.20703	0.20524	0.21882	0.23945	0.18543	0.14971	0.09981	0.08303	0.06907
Virgin Islands, U.S.	0	0	0	0	0	0	0	0	0	0	0	0	0	0	0	0	0	0	0	0	0	0	0	0	0	0	0	0	0	0	0
Virgin Islands, British	0	0	0	0	0	0	0	0	0	0	0	0	0	0	0	0	0	0	0	0	0	0	0	0	0	0	0	0	0	0	0
Albania	0.01437	0.01586	0.01726	0.01875	0.02006	0.02022	0.01991	0.02037	0.02046	0.01931	0.01014	0.00341	0.002	0.00158	0.00075	0.00105	0.00038	0.00048	0.00048	0.00029	0.00021	0.00075	0.00079	0.00079	0.00063	0.00063	0.00063	0.00083	0.00014	0.00014	0.00022
Austria	0.03541	0.03813	0.03517	0.03387	0.03564	0.03434	0.03222	0.02463	0.0239	0.02831	0.02407	0.0183	0.01747	0.01414	0.01341	0.01145	0.01227	0.01249	0.01107	0.01218	0.01178	0.0138	0.01126	0.0023	0	0	0	0	0	0	0
Belgium	0.26251	0.26487	0.23335	0.24627	0.24442	0.212	0.15777	0.08225	0.08398	0.0464	0.03961	0.0225	0.01825	0.0126	0.01212	0.00987	0.00914	0.00771	0.01015	0.01094	0.00636	0.00458	0.00344	0.00482	0.0029	0.00075	0	0	0	0	0
Bosnia and Herzegovina	NA	NA	NA	NA	NA	NA	NA	NA	NA	NA	NA	0.13158	0.11404	0.01228	0.01382	0.02363	0.07653	0.09706	0.09514	0.12471	0.12474	0.13665	0.14719	0.14595	0.1484	0.16219	0.15893	0.183	0.18667	0.17547	0.17813
Bulgaria	0.21941	0.24115	0.24249	0.25142	0.23102	0.26264	0.2742	0.25453	0.25558	0.23539	0.1876	0.18664	0.17765	0.17681	0.19168	0.20428	0.20484	0.20743	0.17659	0.1843	0.18549	0.18106	0.18892	0.18279	0.16993	0.17701	0.19624	0.19865	0.18758	0.20262	0.26158
Croatia	NA	NA	NA	NA	NA	NA	NA	NA	NA	NA	NA	0.00388	0.00351	0.00319	0.00205	0.00172	0.00121	0.00139	0.00045	0	0	0	0	0	0	0	0	0	0	0	0
Cyprus	0	0	0	0	0	0	0	0	0	0	0	0	0	0	0	0	0	0	0	0	0	0	0	0	0	0	0	0	0	0	0
Czech Republic	NA	NA	NA	NA	NA	NA	NA	NA	NA	NA	NA	NA	1.02534	0.93171	0.8881	0.93236	0.71518	0.66216	0.57359	0.62653	0.6381	0.61783	0.59774	0.57852	0.58019	0.58814	0.73514	0.71104	0.65224	0.64918	0.64233
Denmark	0	0	0	0	0	0	0	0	0	0	0	0	0	0	0	0	0	0	0	0	0	0	0	0	0	0	0	0	0	0	0
Faroe Islands	0	0	0	0	0	0	0	0	0	0	0	0	0	0	0	0	0	0	0	0	0	0	0	0	0	0	0	0	0	0	0
Finland	0	0	0	0	0	0	0	0	0	0	0	0	0	0	0	0	0	0	0	0	0	0	0	0	0	0	0	0	0	0	0
Former Czechoslovakia	1.51044	1.53698	1.5856	1.61948	1.58645	1.58148	1.57841	1.55007	1.4777	1.31659	1.22446	1.14264	NA	NA	NA	NA	NA	NA	NA	NA	NA	NA	NA	NA	NA	NA	NA	NA	NA	NA	NA
Former Serbia and Montenegro	NA	NA	NA	NA	NA	NA	NA	NA	NA	NA	NA	0.33974	0.32436	0.29686	0.23569	0.37736	0.38094	0.39085	0.29309	0.35913	0.36073	0.37934	0.39802	0.40074	0.36323	NA	NA	NA	NA	NA	NA
Former Yugoslavia	0.62784	0.66098	0.71815	0.78683	0.84477	0.8545	0.8542	0.8603	0.88041	0.88325	0.81349	NA	NA	NA	NA	NA	NA	NA	NA	NA	NA	NA	NA	NA	NA	NA	NA	NA	NA	NA	NA
France	0.514	0.48878	0.48663	0.47326	0.42697	0.41096	0.39254	0.34485	0.33291	0.30847	0.29452	0.27136	0.24952	0.21981	0.20928	0.20742	0.17117	0.1417	0.12673	0.08692	0.0565	0.04087	0.04491	0.00414	0	0	0	0	0	0	0
Germany	NA	NA	NA	NA	NA	NA	NA	NA	NA	NA	3.96327	3.64907	3.36996	3.20716	3.09165	2.79093	2.8214	2.58534	2.4983	2.45176	2.34414	2.36	2.32448	2.36159	2.29781	2.1815	2.22897	2.05993	1.88324	1.85846	1.90325
Germany, East	2.24634	2.3247	2.34095	2.49568	2.62887	2.62133	2.60209	2.61336	2.53541	2.35806	NA	NA	NA	NA	NA	NA	NA	NA	NA	NA	NA	NA	NA	NA	NA	NA	NA	NA	NA	NA	NA
Germany, West	3.3089	3.31878	3.16174	3.07738	3.1202	3.03183	2.87542	2.79954	2.7586	2.71296	NA	NA	NA	NA	NA	NA	NA	NA	NA	NA	NA	NA	NA	NA	NA	NA	NA	NA	NA	NA	NA
Gibraltar	0	0	0	0	0	0	0	0	0	0	0	0	0	0	0	0	0	0	0	0	0	0	0	0	0	0	0	0	0	0	0
Greece	0.16392	0.16442	0.18359	0.19504	0.21536	0.22861	0.26772	0.28999	0.31125	0.31143	0.31622	0.2718	0.2985	0.29391	0.29785	0.28534	0.32117	0.33865	0.3348	0.34257	0.34967	0.3576	0.3466	0.34931	0.3461	0.3231	0.33069	0.32776	0.32363	0.28188	0.29308
Hungary	0.2575	0.25929	0.24977	0.24732	0.23512	0.22782	0.22595	0.20678	0.19873	0.17402	0.16704	0.15492	0.12593	0.12145	0.12105	0.12732	0.13744	0.12686	0.12516	0.1205	0.11768	0.11181	0.11416	0.09536	0.08118	0.08442	0.08328	0.07977	0.07623	0.0773	0.08105
Iceland	0	0	0	0	0	0	0	0	0	0	0	0	0	0	0	0	0	0	0	0	0	0	0	0	0	0	0	0	0	0	0
Ireland	0.00188	0.00169	0.00205	0.00191	0.00156	0.00147	0.00123	0.00115	0.00117	0.00068	0.00003	0.00003	0.00003	0	0.00002	0.00002	0	0	0	0	0	0	0	0	0	0	0	0	0	0	0
Italy	0.01215	0.019	0.01746	0.01783	0.0192	0.0103	0.00986	0.01092	0.01176	0.01093	0.00985	0.00984	0.0064	0.00258	0.00158	0.00063	0.00104	0.00091	0.00056	0.00007	0.00369	0.00431	0.00661	0.00259	0.00251	0.00056	0.00418	0.0031	0.0019	0.00267	0.00243
Luxembourg	0	0	0	0	0	0	0	0	0	0	0	0	0	0	0	0	0	0	0	0	0	0	0	0	0	0	0	0	0	0	0
Macedonia	NA	NA	NA	NA	NA	NA	NA	NA	NA	NA	NA	0.06104	0.06051	0.06001	0.06341	0.0625	0.06574	0.07222	0.06514	0.05042	0.05437	0.05369	0.05229	0.05132	0.04874	0.04702	0.0461	0.05404	0.0526	0.04763	0.04221
Malta	0	0	0	0	0	0	0	0	0	0	0	0	0	0	0	0	0	0	0	0	0	0	0	0	0	0	0	0	0	0	0
Montenegro	NA	NA	NA	NA	NA	NA	NA	NA	NA	NA	NA	NA	NA	NA	NA	NA	NA	NA	NA	NA	NA	NA	NA	NA	NA	0.01338	0.01065	0.0154	0.00847	0.01715	0.01715
Netherlands	0	0	0	0	0	0	0	0	0	0	0	0	0	0	0	0	0	0	0	0	0	0	0	0	0	0	0	0	0	0	0
Norway	0.01092	0.01172	0.01343	0.01202	0.01351	0.01164	0.01063	0.00703	0.00959	0.00807	0.00879	0.00956	0.00714	0.00802	0.00778	0.00613	0.01079	0.00917	0.0113	0.01767	0.05	0.05962	0.08233	0.08121	0.04114	0.06698	0.1139	0.09592	0.07386	0.05411	0.03876
Poland	3.86273	4.46133	4.53372	4.59765	4.64836	4.72213	4.78279	4.77819	4.42575	3.73329	3.57961	3.51939	3.49749	3.55476	3.41575	3.65505	3.65367	3.16828	3.32008	2.85573	2.85677	2.8587	2.84045	2.79282	2.71938	2.65149	2.46506	2.39827	2.23665	2.20203	2.24305
Portugal	0.00299	0.0029	0.00301	0.00316	0.00387	0.00384	0.00424	0.00374	0.0042	0.00386	0.00372	0.00304	0.00271	0.00202	0	0	0	0	0	0	0	0	0	0	0	0	0	0	0	0	0
Romania	0.36623	0.37546	0.44157	0.43904	0.4421	0.44981	0.48442	0.53983	0.54258	0.33114	0.28156	0.30307	0.29442	0.30148	0.30277	0.32938	0.25952	0.20179	0.1901	0.23294	0.26159	0.2378	0.25845	0.24921	0.24352	0.27316	0.27971	0.28029	0.26548	0.24323	0.27547
Serbia	NA	NA	NA	NA	NA	NA	NA	NA	NA	NA	NA	NA	NA	NA	NA	NA	NA	NA	NA	NA	NA	NA	NA	NA	NA	0.36765	0.37064	0.39068	0.39427	0.38989	0.41503
Slovakia	NA	NA	NA	NA	NA	NA	NA	NA	NA	NA	NA	NA	0.04188	0.04291	0.04367	0.04449	0.04776	0.0482	0.04257	0.04242	0.04083	0.03876	0.03526	0.03253	0.02767	0.02426	0.02326	0.0267	0.02835	0.02621	0.02618
Slovenia	NA	NA	NA	NA	NA	NA	NA	NA	NA	NA	NA	0.06121	0.05602	0.05179	0.05951	0.05699	0.05705	0.0553	0.05563	0.05419	0.05009	0.05727	0.05836	0.0572	0.05422	0.05397	0.05271	0.05265	0.052	0.05079	0.05173
Spain	0.52944	0.58876	0.60346	0.59488	0.59758	0.57939	0.51496	0.49025	0.53346	0.52573	0.49325	0.49183	0.46199	0.44604	0.34965	0.33658	0.34245	0.32992	0.38581	0.35137	0.35464	0.33927	0.31855	0.31391	0.3008	0.28844	0.27108	0.20289	0.18952	0.16864	0.13241
Sweden	0.00064	0.0003	0.0003	0.0003	0.00027	0.00027	0.00057	0.00068	0.00046	0.00025	0.00064	0.00095	0.0001	0.00001	0	0	0	0	0	0	0	0	0	0	0	0	0	0	0	0	0
Switzerland	0	0	0	0	0	0	0	0	0	0	0	0	0	0	0	0	0	0	0	0	0	0	0	0	0	0	0	0	0	0	0
Turkey	0.23917	0.25852	0.27559	0.31339	0.40382	0.46136	0.46626	0.39908	0.50481	0.44767	0.43485	0.4851	0.46823	0.47038	0.4655	0.47372	0.53544	0.57222	0.54898	0.55031	0.53107	0.48501	0.43941	0.42351	0.54239	0.59143	0.69361	0.72892	0.73666	0.68093	0.72195
United Kingdom	3.19766	3.12393	2.99155	1.2808	2.35072	2.70365	2.61111	2.60354	2.52854	2.36072	2.37378	1.95217	1.56733	1.12308	1.14032	1.15809	1.19029	0.9919	0.89635	0.71643	0.77848	0.72982	0.68565	0.60608	0.49438	0.44663	0.40856	0.43484	0.42916	0.44004	0.4419
Armenia	NA	NA	NA	NA	NA	NA	NA	NA	NA	NA	NA	0	0	0	0	0	0	0	0	0	0	0	0	0	0	0	0	0	0	0	0
Azerbaijan	NA	NA	NA	NA	NA	NA	NA	NA	NA	NA	NA	0	0	0	0	0	0	0	0	0	0	0	0	0	0	0	0	0	0	0	0
Belarus	NA	NA	NA	NA	NA	NA	NA	NA	NA	NA	NA	0	0	0	0	0	0	0	0	0	0	0	0	0	0	0	0	0	0	0	0
Estonia	NA	NA	NA	NA	NA	NA	NA	NA	NA	NA	NA	0.17354	0.10058	0.10136	0.09119	0.13546	0.11203	0.10385	0.08905	0.09772	0.09864	0.10333	0.12409	0.1166	0.12158	0.11745	0.13786	0.1343	0.12448	0.14943	0.15611
Former U.S.S.R.	11.88763	12.07563	12.00194	12.13295	12.34464	12.74558	12.89288	13.05798	12.52757	13.67494	10.65125	NA	NA	NA	NA	NA	NA	NA	NA	NA	NA	NA	NA	NA	NA	NA	NA	NA	NA	NA	NA
Georgia	NA	NA	NA	NA	NA	NA	NA	NA	NA	NA	NA	0.00262	0.00278	0.00342	0.0006	0.00028	0.00008	0.00022	0.0003	0.00013	0.00002	0.00011	0.00015	0.00015	0.00009	0.00017	0.00026	0.0002	0.00281	0.00194	0.00135
Kazakhstan	NA	NA	NA	NA	NA	NA	NA	NA	NA	NA	NA	2.31012	2.05488	1.45338	1.17383	1.19376	1.05937	1.0328	1.09874	1.42198	1.45236	1.35651	1.55694	1.59344	1.59508	1.76919	1.79181	2.03511	1.84497	2.02267	2.13431
Kyrgyzstan	NA	NA	NA	NA	NA	NA	NA	NA	NA	NA	NA	0.02952	0.02272	0.0115	0.00639	0.00615	0.00761	0.00639	0.00646	0.0066	0.00736	0.00712	0.00632	0.00682	0.00508	0.00486	0.0059	0.00739	0.00904	0.00874	0.01271
Latvia	NA	NA	NA	NA	NA	NA	NA	NA	NA	NA	NA	0	0	0	0	0	0	0	0	0	0	0	0	0	0	0	0	0	0	0	0
Lithuania	NA	NA	NA	NA	NA	NA	NA	NA	NA	NA	NA	0	0	0	0	0	0	0	0	0	0	0	0	0	0	0	0	0	0	0	0
Moldova	NA	NA	NA	NA	NA	NA	NA	NA	NA	NA	NA	0.00483	0.00332	0.00206	0.00059	0.00055	0.0007	0.00012	0	0	0	0	0	0	0	0	0	0	0	0	0
Russia	NA	NA	NA	NA	NA	NA	NA	NA	NA	NA	NA	5.38686	4.88431	4.38264	4.25769	4.30644	3.91807	3.7378	4.77354	4.85566	4.83479	4.88797	5.29079	5.40675	5.91975	5.9547	6.0766	6.36042	6.60978	6.87379	7.05002
Tajikistan	NA	NA	NA	NA	NA	NA	NA	NA	NA	NA	NA	0.00377	0.00306	0.00187	0.0006	0.00035	0.00031	0.00035	0.00035	0.00041	0.00044	0.00067	0.00087	0.00172	0.00183	0.00194	0.00335	0.00368	0.00374	0.0037	0.0037
Turkmenistan	NA	NA	NA	NA	NA	NA	NA	NA	NA	NA	NA	0	0	0	0	0	0	0	0	0	0	0	0	0	0	0	0	0	0	0	0
Ukraine	NA	NA	NA	NA	NA	NA	NA	NA	NA	NA	NA	2.23605	1.91708	1.54061	1.6576	1.27776	1.25113	1.27296	1.34349	1.335	1.31953	1.31708	1.37645	1.29633	1.31407	1.34312	1.27889	1.29451	1.20231	1.20098	1.34226
Uzbekistan	NA	NA	NA	NA	NA	NA	NA	NA	NA	NA	NA	0.0654	0.0536	0.05394	0.04346	0.03968	0.04321	0.04289	0.04358	0.03773	0.03953	0.03991	0.0279	0.04093	0.04514	0.0476	0.05082	0.04875	0.05368	0.04896	0.04226
Bahrain	0	0	0	0	0	0	0	0	0	0	0	0	0	0	0	0	0	0	0	0	0	0	0	0	0	0	0	0	0	0	0
Iran	0.02024	0.03247	0.02967	0.03588	0.0362	0.03649	0.03586	0.03643	0.0347	0.03181	0.02591	0.02808	0.02802	0.03739	0.03161	0.03258	0.031	0.03152	0.03003	0.02942	0.02501	0.02644	0.02929	0.03085	0.03987	0.0423	0.04266	0.04074	0.02952	0.02626	0.03008
Iraq	0	0	0	0	0	0	0	0	0	0	0	0	0	0	0	0	0	0	0	0	0	0	0	0	0	0	0	0	0	0	0
Israel	0	0	0	0	0	0	0	0	0	0	0	0	0	0	0	0	0	0	0	0	0	0	0	0	0	0	0	0	0	0	0
Jordan	0	0	0	0	0	0	0	0	0	0	0	0	0	0	0	0	0	0	0	0	0	0	0	0	0	0	0	0	0	0	0
Kuwait	0	0	0	0	0	0	0	0	0	0	0	0	0	0	0	0	0	0	0	0	0	0	0	0	0	0	0	0	0	0	0
Lebanon	0	0	0	0	0	0	0	0	0	0	0	0	0	0	0	0	0	0	0	0	0	0	0	0	0	0	0	0	0	0	0
Oman	0	0	0	0	0	0	0	0	0	0	0	0	0	0	0	0	0	0	0	0	0	0	0	0	0	0	0	0	0	0	0
Palestinian Territories	NA	NA	NA	NA	NA	NA	NA	NA	NA	NA	NA	NA	NA	NA	NA	NA	0	0	0	0	0	0	0	0	0	0	0	0	0	0	0
Qatar	0	0	0	0	0	0	0	0	0	0	0	0	0	0	0	0	0	0	0	0	0	0	0	0	0	0	0	0	0	0	0
Saudi Arabia	0	0	0	0	0	0	0	0	0	0	0	0	0	0	0	0	0	0	0	0	0	0	0	0	0	0	0	0	0	0	0
Syria	0	0	0	0	0	0	0	0	0	0	0	0	0	0	0	0	0	0	0	0	0	0	0	0	0	0	0	0	0	0	0
United Arab Emirates	0	0	0	0	0	0	0	0	0	0	0	0	0	0	0	0	0	0	0	0	0	0	0	0	0	0	0	0	0	0	0
Yemen	0	0	0	0	0	0	0	0	0	0	0	0	0	0	0	0	0	0	0	0	0	0	0	0	0	0	0	0	0	0	0
Algeria	0.00019	0.00019	0.00019	0.00019	0.00022	0.00024	0.00022	0.00027	0.0004	0.00027	0.0004	0.0004	0.00054	0.00054	0.00061	0.00033	0.00028	0.0002	0.00013	0	0	0	0	0	0	0	0	0	0	0	0
Angola	0	0	0	0	0	0	0	0	0	0	0	0	0	0	0	0	0	0	0	0	0	0	0	0	0	0	0	0	0	0	0
Benin	0	0	0	0	0	0	0	0	0	0	0	0	0	0	0	0	0	0	0	0	0	0	0	0	0	0	0	0	0	0	0
Botswana	0.00922	0.01004	0.00958	0.00953	0.0106	0.01211	0.01405	0.01486	0.01608	0.01926	0.01901	0.02186	0.02158	0.02183	0.02496	0.02053	0.01991	0.02378	0.02421	0.02427	0.02383	0.02442	0.02109	0.02339	0.02524	0.02465	0.02122	0.02332	0.01891	0.02532	0.01891
Burkina Faso	0	0	0	0	0	0	0	0	0	0	0	0	0	0	0	0	0	0	0	0	0	0	0	0	0	0	0	0	0	0	0
Burundi	0	0	0	0	0	0	0	0	0	0	0	0	0	0	0	0	0	0	0	0	0	0	0	0	0	0	0	0	0	0	0
Cameroon	0	0	0	0	0.00002	0.00002	0.00002	0.00002	0.00002	0.00002	0.00002	0.00002	0.00002	0.00002	0.00002	0.00002	0.00003	0.00003	0.00003	0.00003	0	0	0	0	0	0	0	0	0	0	0
Cape Verde	0	0	0	0	0	0	0	0	0	0	0	0	0	0	0	0	0	0	0	0	0	0	0	0	0	0	0	0	0	0	0
Central African Republic	0	0	0	0	0	0	0	0	0	0	0	0	0	0	0	0	0	0	0	0	0	0	0	0	0	0	0	0	0	0	0
Chad	0	0	0	0	0	0	0	0	0	0	0	0	0	0	0	0	0	0	0	0	0	0	0	0	0	0	0	0	0	0	0
Comoros	0	0	0	0	0	0	0	0	0	0	0	0	0	0	0	0	0	0	0	0	0	0	0	0	0	0	0	0	0	0	0
Congo (Brazzaville)	0	0	0	0	0	0	0	0	0	0	0	0	0	0	0	0	0	0	0	0	0	0	0	0	0	0	0	0	0	0	0
Congo (Kinshasa)	0.00369	0.00324	0.00298	0.00319	0.00319	0.00314	0.00322	0.00396	0.0029	0.00206	0.00211	0.00224	0.00243	0.00248	0.00264	0.00256	0.00233	0.00241	0.00241	0.00241	0.00249	0.00256	0.00264	0.00271	0.00301	0.00309	0.00319	0.00329	0.00339	0.00349	0.00331
Cote dIvoire (IvoryCoast)	0	0	0	0	0	0	0	0	0	0	0	0	0	0	0	0	0	0	0	0	0	0	0	0	0	0	0	0	0	0	0
Djibouti	0	0	0	0	0	0	0	0	0	0	0	0	0	0	0	0	0	0	0	0	0	0	0	0	0	0	0	0	0	0	0
Egypt	0	0	0	0	0	0	0	0	0	0	0	0	0	0	0	0	0	0	0.001	0.00149	0.00095	0.00095	0.00095	0.00085	0.00064	0	0	0	0	0	0.00061
Equatorial Guinea	0	0	0	0	0	0	0	0	0	0	0	0	0	0	0	0	0	0	0	0	0	0	0	0	0	0	0	0	0	0	0
Eritrea	NA	NA	NA	NA	NA	NA	NA	NA	NA	NA	NA	NA	NA	0	0	0	0	0	0	0	0	0	0	0	0	0	0	0	0	0	0
Ethiopia	0	0	0	0	0	0	0	0	0	0	0	0	0	0	0	0	0	0	0	0	0	0	0	0	0	0	0	0	0	0	0
Gabon	0	0	0	0	0	0	0	0	0	0	0	0	0	0	0	0	0	0	0	0	0	0	0	0	0	0	0	0	0	0	0
Gambia, The	0	0	0	0	0	0	0	0	0	0	0	0	0	0	0	0	0	0	0	0	0	0	0	0	0	0	0	0	0	0	0
Ghana	0	0	0	0	0	0	0	0	0	0	0	0	0	0	0	0	0	0	0	0	0	0	0	0	0	0	0	0	0	0	0
Guinea	0	0	0	0	0	0	0	0	0	0	0	0	0	0	0	0	0	0	0	0	0	0	0	0	0	0	0	0	0	0	0
Guinea-Bissau	0	0	0	0	0	0	0	0	0	0	0	0	0	0	0	0	0	0	0	0	0	0	0	0	0	0	0	0	0	0	0
Kenya	0	0	0	0	0	0	0	0	0	0	0	0	0	0	0	0	0	0	0	0	0	0	0	0	0	0	0	0	0	0	0
Lesotho	0	0	0	0	0	0	0	0	0	0	0	0	0	0	0	0	0	0	0	0	0	0	0	0	0	0	0	0	0	0	0
Liberia	0	0	0	0	0	0	0	0	0	0	0	0	0	0	0	0	0	0	0	0	0	0	0	0	0	0	0	0	0	0	0
Libya	0	0	0	0	0	0	0	0	0	0	0	0	0	0	0	0	0	0	0	0	0	0	0	0	0	0	0	0	0	0	0
Madagascar	0	0	0	0	0	0	0	0	0	0	0	0	0	0	0	0	0	0	0	0	0	0	0	0	0	0	0	0	0	0	0
Malawi	0	0	0	0	0	0	0	0	0	0	0	0	0	0	0	0	0	0	0.00162	0.00202	0.00124	0.00153	0.00169	0.00128	0.00115	0.00141	0.00154	0.00134	0.00138	0.00128	0.00128
Mali	0	0	0	0	0	0	0	0	0	0	0	0	0	0	0	0	0	0	0	0	0	0	0	0	0	0	0	0	0	0	0
Mauritania	0	0	0	0	0	0	0	0	0	0	0	0	0	0	0	0	0	0	0	0	0	0	0	0	0	0	0	0	0	0	0
Mauritius	0	0	0	0	0	0	0	0	0	0	0	0	0	0	0	0	0	0	0	0	0	0	0	0	0	0	0	0	0	0	0
Morocco	0.02336	0.02439	0.02492	0.02781	0.02572	0.02572	0.02104	0.02114	0.01672	0.01745	0.01828	0.01911	0.02004	0.02157	0.02157	0.01679	0.01248	0.00893	0.00729	0.00175	0.00011	0	0	0.00056	0.00028	0.00009	0	0	0	0	0
Mozambique	0.00888	0.00541	0.00156	0.00108	0.00094	0.00108	0.00116	0.00121	0.00113	0.00108	0.00113	0.00108	0.00108	0.00108	0.00106	0.00054	0.00045	0.00045	0.00042	0.0004	0.0007	0.00109	0.00092	0.00042	0.00007	0.00102	0.0006	0.00095	0.00095	0.00095	0.00095
Namibia	NA	NA	NA	NA	NA	NA	NA	NA	NA	0	0	0	0	0	0	0	0	0	0	0	0	0	0	0	0	0	0	0	0	0	0
Niger	0.00083	0.00125	0.00361	0.00417	0.00419	0.00344	0.00456	0.00431	0.00475	0.00478	0.00478	0.00472	0.00478	0.00478	0.00481	0.00465	0.00446	0.00446	0.00448	0.00405	0.00418	0.00469	0.00484	0.00606	0.00466	0.00452	0.00439	0.00469	0.00577	0.00577	0.00577
Nigeria	0.00312	0.00153	0.00145	0.00223	0.00374	0.00387	0.0039	0.00221	0.00218	0.00242	0.00269	0.00234	0.00075	0.00067	0.00056	0.00022	0.00026	0.00031	0.00041	0.00008	0.00008	0.0011	0.00059	0.00008	0.0002	0.0002	0.0002	0.0002	0.0002	0.0002	0.0002
Reunion	0	0	0	0	0	0	0	0	0	0	0	0	0	0	0	0	0	0	0	0	0	0	0	0	0	0	0	0	0	0	0
Rwanda	0	0	0	0	0	0	0	0	0	0	0	0	0	0	0	0	0	0	0	0	0	0	0	0	0	0	0	0	0	0	0
Saint Helena	0	0	0	0	0	0	0	0	0	0	0	0	0	0	0	0	0	0	0	0	0	0	0	0	0	0	0	0	0	0	0
Sao Tome and Principe	0	0	0	0	0	0	0	0	0	0	0	0	0	0	0	0	0	0	0	0	0	0	0	0	0	0	0	0	0	0	0
Senegal	0	0	0	0	0	0	0	0	0	0	0	0	0	0	0	0	0	0	0	0	0	0	0	0	0	0	0	0	0	0	0
Seychelles	0	0	0	0	0	0	0	0	0	0	0	0	0	0	0	0	0	0	0	0	0	0	0	0	0	0	0	0	0	0	0
Sierra Leone	0	0	0	0	0	0	0	0	0	0	0	0	0	0	0	0	0	0	0	0	0	0	0	0	0	0	0	0	0	0	0
Somalia	0	0	0	0	0	0	0	0	0	0	0	0	0	0	0	0	0	0	0	0	0	0	0	0	0	0	0	0	0	0	0
South Africa	3.0509	3.16262	3.27507	3.66932	3.91794	3.98965	3.98843	4.09393	3.97821	3.94818	4.00728	4.10877	4.14445	4.39856	4.63032	4.63614	5.20443	5.25989	5.17633	5.3029	5.34235	5.23541	5.61923	5.70191	5.75272	5.74774	5.81565	5.92242	5.85846	5.97664	5.94337
Sudan and South Sudan	0	0	0	0	0	0	0	0	0	0	0	0	0	0	0	0	0	0	0	0	0	0	0	0	0	0	0	0	0	0	0
Swaziland	0.00423	0.00423	0.00263	0.00322	0.00428	0.00444	0.00426	0.00426	0.00426	0.00412	0.00317	0.00259	0.00128	0.0047	0.00441	0.00348	0.00874	0.00874	0.01132	0.00892	0.01153	0.01306	0.01052	0.01136	0.01155	0.01136	0.01183	0.01219	0.01234	0.01234	0.01234
Tanzania	0.00005	0.00005	0.00011	0.00008	0.00011	0.00011	0.00008	0.00008	0.00008	0.00011	0.00011	0.00011	0.00118	0.00124	0.00122	0.00146	0.00072	0.00115	0.00192	0.00202	0.002	0.00202	0.00141	0.00167	0.00192	0.00205	0.0022	0.00236	0.00251	0.00269	0.00243
Togo	0	0	0	0	0	0	0	0	0	0	0	0	0	0	0	0	0	0	0	0	0	0	0	0	0	0	0	0	0	0	0
Tunisia	0	0	0	0	0	0	0	0	0	0	0	0	0	0	0	0	0	0	0	0	0	0	0	0	0	0	0	0	0	0	0
Uganda	0	0	0	0	0	0	0	0	0	0	0	0	0	0	0	0	0	0	0	0	0	0	0	0	0	0	0	0	0	0	0
Western Sahara	0	0	0	0	0	0	0	0	0	0	0	0	0	0	0	0	0	0	0	0	0	0	0	0	0	0	0	0	0	0	0
Zambia	0.01312	0.01563	0.01171	0.01327	0.01318	0.01425	0.01195	0.01351	0.01059	0.00973	0.00891	0.01128	0.00929	0.00454	0.00356	0.00436	0.00442	0.00477	0.00465	0.00477	0.00499	0.00524	0.00548	0.00293	0.00369	0.00157	0.00034	0.00002	0.00002	0.00002	0.00002
Zimbabwe	0.07712	0.07449	0.08947	0.08363	0.08377	0.10886	0.13028	0.13625	0.1235	0.13334	0.15107	0.14924	0.14216	0.13194	0.1249	0.11866	0.10759	0.11181	0.12428	0.11444	0.11136	0.10644	0.09537	0.09174	0.09728	0.0926	0.09279	0.0727	0.07662	0.08282	0.08049
Afghanistan	0.00303	0.00352	0.00352	0.00359	0.00366	0.00388	0.00405	0.00335	0.00308	0.00255	0.00228	0.00106	0.00115	0.00126	0.00138	0.0015	0.00163	0.00172	0.00194	0.00207	0.00067	0.00054	0.0009	0.00087	0.00085	0.0009	0.00623	0.00889	0.01281	0.01281	0.01281
American Samoa	0	0	0	0	0	0	0	0	0	0	0	0	0	0	0	0	0	0	0	0	0	0	0	0	0	0	0	0	0	0	0
Australia	2.27727	2.32074	2.63489	2.86031	3.08285	3.35513	3.80316	3.3472	3.71942	3.95353	4.24742	4.41381	4.43158	4.55854	4.91947	5.0017	5.683	6.09066	6.24887	6.64581	7.32971	7.54383	7.59472	7.90154	8.35133	8.67602	9.09352	9.00951	9.34884	9.66043	9.44294
Bangladesh	0	0	0	0	0	0	0	0	0	0	0	0	0	0	0	0	0	0	0	0	0	0	0	0	0.0016	0.00939	0.00752	0.01749	0.01849	0.01603	0.02082
Bhutan	0	0	0	0.00001	0.00001	0.00002	0.00004	0.00004	0.00004	0.00004	0.00004	0.00108	0.00094	0.00131	0.00189	0.00172	0.00138	0.00128	0.00128	0.00128	0.00217	0.00227	0.0017	0.00076	0.00219	0.00251	0.0027	0.00317	0.00124	0.00128	0.00128
Brunei	0	0	0	0	0	0	0	0	0	0	0	0	0	0	0	0	0	0	0	0	0	0	0	0	0	0	0	0	0	0	0
Burma (Myanmar)	0.00082	0.00111	0.00127	0.00156	0.00153	0.00178	0.00136	0.00111	0.0011	0.00117	0.00131	0.00126	0.00112	0.00104	0.00117	0.00105	0.00091	0.00097	0.00338	0.01293	0.01493	0.01184	0.021	0.0107	0.0135	0.01686	0.01832	0.01581	0.01464	0.01689	0.03128
Cambodia	0	0	0	0	0	0	0	0	0	0	0	0	0	0	0	0	0	0	0	0	0	0	0	0	0	0	0	0	0	0	0
China	12.4319	13.3243	14.29101	15.78522	16.44822	16.88687	17.56639	18.59407	20.0589	20.54882	20.84238	21.43973	22.1766	23.67501	24.36141	25.47194	28.53138	28.84367	27.28311	28.35003	30.43427	34.56288	39.33536	42.88956	49.8822	53.29554	57.26083	60.85843	65.8986	69.92693	76.7131
Cook Islands	0	0	0	0	0	0	0	0	0	0	0	0	0	0	0	0	0	0	0	0	0	0	0	0	0	0	0	0	0	0	0
Fiji	0	0	0	0	0	0	0	0	0	0	0	0	0	0	0	0	0	0	0	0	0	0	0	0	0	0	0	0	0	0	0
French Polynesia	0	0	0	0	0	0	0	0	0	0	0	0	0	0	0	0	0	0	0	0	0	0	0	0	0	0	0	0	0	0	0
Guam	0	0	0	0	0	0	0	0	0	0	0	0	0	0	0	0	0	0	0	0	0	0	0	0	0	0	0	0	0	0	0
Hawaiian Trade Zone	0	0	0	0	0	0	NA	NA	NA	NA	NA	NA	NA	NA	NA	NA	NA	NA	NA	NA	NA	NA	NA	NA	NA	NA	NA	NA	NA	NA	NA
Hong Kong	0	0	0	0	0	0	0	0	0	0	0	0	0	0	0	0	0	0	0	0	0	0	0	0	0	0	0	0	0	0	0
India	2.4232	2.53033	2.64957	3.13452	3.2323	3.53249	3.55157	3.8096	3.93836	4.16108	4.52932	4.77241	4.91513	5.10541	6.38812	5.72322	5.98118	6.07106	6.31267	6.55176	6.88545	6.50123	6.90933	7.33655	7.78031	8.22534	8.73788	9.35897	10.10238	10.06122	10.51349
Indonesia	0.01863	0.01608	0.01799	0.04116	0.05672	0.07492	0.08664	0.11331	0.23704	0.28207	0.36893	0.6014	0.78891	0.86821	1.14292	1.34922	1.40614	1.58965	1.89041	1.96285	2.39845	2.61699	3.0006	3.68244	4.36983	5.97834	6.37591	6.37422	7.46273	8.32759	9.64207
Japan	0.44693	0.42487	0.41416	0.40967	0.40166	0.32246	0.30662	0.29077	0.26444	0.2385	0.20218	0.18185	0.16748	0.1474	0.13811	0.13481	0.09114	0.08489	0.08471	0.06476	0.07009	0	0	0	0	0	0	0	0	0	0
Kiribati	0	0	0	0	0	0	0	0	0	0	0	0	0	0	0	0	0	0	0	0	0	0	0	0	0	0	0	0	0	0	0
Korea, North	1.14005	1.19965	1.20988	1.2434	1.29644	1.28222	1.25613	1.56898	1.22236	1.15487	1.11872	0.95479	0.87468	0.81995	0.76423	0.68908	0.64387	0.58136	0.65638	0.70327	0.72202	0.69495	0.71611	0.75291	0.82389	0.83498	0.72473	0.7697	0.75207	0.76472	0.75207
Korea, South	0.3548	0.35929	0.35473	0.38168	0.40263	0.43318	0.43355	0.43393	0.37124	0.30751	0.26895	0.21375	0.16863	0.13282	0.10214	0.08841	0.08459	0.08177	0.07869	0.07781	0.07157	0.06221	0.06183	0.05983	0.0531	0.05295	0.05411	0.05199	0.04723	0.03907	0.03907
Laos	0	0	0.00001	0.00001	0.00002	0.00005	0.00002	0.00002	0.00002	0.00002	0.00002	0.00002	0.00002	0.00002	0.00065	0.00136	0.00257	0.00371	0.00692	0.00676	0.00604	0.00814	0.00718	0.01016	0.0104	0.01108	0.01479	0.01321	0.01444	0.01413	0.01413
Macau	0	0	0	0	0	0	0	0	0	0	0	0	0	0	0	0	0	0	0	0	0	0	0	0	0	0	0	0	0	0	0
Malaysia	0	0	0	0	0	0.00058	0.00234	0.00239	0.00292	0.00299	0.00484	0.00473	0.00325	0.0036	0.00311	0.00671	0.00636	0.00919	0.00723	0.0112	0.01592	0.0103	0.0051	0.01135	0.01763	0.02059	0.02354	0.028	0.04775	0.05353	0.06347
Maldives	0	0	0	0	0	0	0	0	0	0	0	0	0	0	0	0	0	0	0	0	0	0	0	0	0	0	0	0	0	0	0
Mongolia	0.04801	0.06005	0.06073	0.06117	0.0727	0.07848	0.08746	0.09654	0.09077	0.08052	0.09697	0.08113	0.07063	0.06381	0.07003	0.04594	0.0421	0.04324	0.04259	0.04442	0.04408	0.04755	0.04559	0.04664	0.09944	0.10976	0.13348	0.15599	0.243	0.51407	0.6428
Nauru	0	0	0	0	0	0	0	0	0	0	0	0	0	0	0	0	0	0	0	0	0	0	0	0	0	0	0	0	0	0	0
Nepal	0.00008	0.00008	0.00008	0.00007	0.00007	0.00004	0	0	0	0	0.00005	0.00002	0.00005	0.00015	0.00015	0.0002	0.0004	0.00027	0.00045	0.00042	0.00025	0.0003	0.00027	0.00022	0.0003	0.0005	0.00035	0.00037	0.00037	0.0004	0.0004
New Caledonia	0	0	0	0	0	0	0	0	0	0	0	0	0	0	0	0	0	0	0	0	0	0	0	0	0	0	0	0	0	0	0
New Zealand	0.0628	0.06221	0.06871	0.06976	0.06745	0.06829	0.05903	0.06366	0.06998	0.06421	0.06664	0.07402	0.0767	0.07204	0.08485	0.08624	0.09067	0.08192	0.09726	0.1019	0.11056	0.12783	0.14852	0.14548	0.14861	0.16302	0.13592	0.13816	0.12805	0.14971	0.13821
Niue	0	0	0	0	0	0	0	0	0	0	0	0	0	0	0	0	0	0	0	0	0	0	0	0	0	0	0	0	0	0	0
Pakistan	0.03662	0.0417	0.03801	0.04129	0.04646	0.04532	0.04622	0.05845	0.05614	0.05897	0.06189	0.06587	0.06589	0.06889	0.06414	0.06781	0.06518	0.04516	0.04924	0.04811	0.05175	0.05095	0.05166	0.06489	0.07008	0.0576	0.06596	0.06103	0.05252	0.05298	0.05636
Papua New Guinea	0	0	0	0	0	0	0	0	0	0	0	0	0	0	0	0	0	0	0	0	0	0	0	0	0	0	0	0	0	0	0
Philippines	0.00749	0.01256	0.0228	0.02716	0.02818	0.0276	0.02665	0.02981	0.02755	0.02768	0.02817	0.03706	0.03737	0.03227	0.02418	0.02323	0.02154	0.01994	0.01998	0.02704	0.02462	0.03042	0.03998	0.04962	0.0576	0.04712	0.06788	0.07218	0.09373	0.13299	0.18869
Samoa	0	0	0	0	0	0	0	0	0	0	0	0	0	0	0	0	0	0	0	0	0	0	0	0	0	0	0	0	0	0	0
Singapore	0	0	0	0	0	0	0	0	0	0	0	0	0	0	0	0	0	0	0	0	0	0	0	0	0	0	0	0	0	0	0
Solomon Islands	0	0	0	0	0	0	0	0	0	0	0	0	0	0	0	0	0	0	0	0	0	0	0	0	0	0	0	0	0	0	0
Sri Lanka	0	0	0	0	0	0	0	0	0	0	0	0	0	0	0	0	0	0	0	0	0	0	0	0	0	0	0	0	0	0	0
Taiwan	0.06633	0.06464	0.06064	0.05453	0.05038	0.04678	0.04066	0.03323	0.02127	0.0128	0.01092	0.00867	0.00807	0.00702	0.00653	0.00397	0.00256	0.00204	0.00237	0.00215	0	0	0	0	0	0	0	0	0	0	0
Thailand	0.01826	0.02314	0.02182	0.02723	0.0566	0.06043	0.07575	0.0799	0.09843	0.13611	0.16025	0.15994	0.16148	0.17748	0.19096	0.27528	0.28322	0.24363	0.22064	0.2149	0.2369	0.23684	0.22768	0.24237	0.25226	0.23042	0.22038	0.22095	0.2149	0.22164	0.25539
Timor-Leste (East Timor)	NA	NA	NA	NA	NA	NA	NA	NA	NA	NA	NA	NA	NA	NA	NA	NA	NA	NA	NA	NA	NA	NA	0	0	0	0	0	0	0	0	0
Tonga	0	0	0	0	0	0	0	0	0	0	0	0	0	0	0	0	0	0	0	0	0	0	0	0	0	0	0	0	0	0	0
U.S. Pacific Islands	0	0	0	0	0	0	0	0	0	0	0	0	0	0	0	0	0	0	0	0	0	0	0	0	0	0	0	0	0	0	0
Vanuatu	0	0	0	0	0	0	0	0	0	0	0	0	0	0	0	0	0	0	0	0	0	0	0	0	0	0	0	0	0	0	0
Vietnam	0.13999	0.14652	0.14699	0.11666	0.13052	0.14284	0.14774	0.14137	0.11983	0.10875	0.11982	0.11824	0.14539	0.14132	0.20156	0.236	0.2657	0.27233	0.22466	0.27086	0.30243	0.37098	0.38964	0.59496	0.75854	0.91266	0.99795	0.95287	1.02536	1.04207	1.03883
Wake Island	0	0	0	0	0	0	0	0	0	0	0	0	0	0	0	0	0	0	0	0	0	0	0	0	0	0	0	0	0	0	0
