# Supplementary material
Source: MDPI journal article supplement (https://www.mdpi.com/1099-4300/15/12/5565)
Supplement: s2 [file s2 › Sources/data/Coal Use.csv]

Region	1980	1981	1982	1983	1984	1985	1986	1987	1988	1989	1990	1991	1992	1993	1994	1995	1996	1997	1998	1999	2000	2001	2002	2003	2004	2005	2006	2007	2008	2009	2010	2011
North America	749074.21149	780496.90841	758847.14602	792369.90037	852428.77869	878999.86331	861930.3538	901396.04413	952524.14055	964217.3192	966992.00822	963371.94215	974367.78379	1008868.45348	1019725.305	1032722.69096	1079692.81971	1106625.2897	1117440.37319	1118915.03649	1168906.711	1144777.69125	1152514.53579	1182812.06175	1190274.01673	1213050.2886	1197740.73697	1212195.97757	1200107.96379	1069811.42171	1124932.66253	1071817.66779
Bermuda	0	0	0	0	0	0	0	0	0	0	0	0	0	0	0	0	0	0	0	0	0	0	0	0	0	0	0	0	0	0	0	0
Canada	41321.24362	42807.15934	46094.25181	49178.51899	54498.27362	53685.87014	49777.07406	55780.26173	60763.81138	60336.11458	53849.01222	55937.32676	58421.39974	55048.32698	57251.84739	58457.77602	59333.01124	62955.81594	65680.12005	65292.49336	69616.47391	68336.69042	68618.88213	68554.94807	66222.45724	66434.10102	64905.19516	63615.49087	62484.51941	54423.31644	53841.29604	47122.70831
Greenland	2.20462	2.20462	1.10231	1.10231	1.10231	0	0	0	0	0	0	0	0	0	0	0	0	0	0	0	0	0	0	0	0	0	0	0	0	0	0	0
Mexico	5021.02824	5060.71145	5841.14789	6517.96707	6633.70976	7265.33417	7922.31174	8675.1904	8118.52316	8881.32262	8645.42799	8207.81038	8291.58605	9738.8415	11187.55861	12161.14095	14039.03747	14125.01776	14657.43415	14976.00213	15195.36209	16295.46883	17541.08066	19396.27068	16797.0205	20638.57558	20543.77681	20582.35771	17075.00138	17910.49827	19784.38349	21629.06848
Saint Pierre and Miquelon	0	0	0	0	0	0	0	0	0	0	0	0	0	0	0	0	0	0	0	0	0	0	0	0	0	0	0	0	0	0	0	0
United States	702729.735	732626.833	706910.644	736672.312	791295.693	818048.659	804230.968	836940.592	883641.806	894999.882	904497.568	899226.805	907654.798	944081.285	951285.899	962103.774	1006320.771	1029544.456	1037102.819	1038646.541	1084094.875	1060145.532	1066354.573	1094860.843	1107254.539	1125977.612	1112291.765	1127998.129	1120548.443	997477.607	1051306.983	1003065.891
Central & South America	19422.23011	19599.28888	19965.42159	22023.18888	24473.54436	28320.28031	28455.61659	28886.01406	30935.04553	31469.08783	26507.73541	31084.11661	30543.15731	31200.44827	32822.86286	32925.59101	35276.88353	37173.2085	37373.87877	36736.94012	36711.62774	34022.19063	33606.24358	36015.797	38724.71615	39360.04432	40689.38773	41460.93954	44791.35285	39342.47348	46970.68855	49567.81127
Antarctica	0	0	0	0	0	0	0	0	0	0	0	0	0	0	0	0	0	0	0	0	0	0	0	0	0	0	0	0	0	0	0	0
Antigua and Barbuda	0	0	0	0	0	0	0	0	0	0	0	0	0	0	0	0	0	0	0	0	0	0	0	0	0	0	0	0	0	0	0	0
Argentina	1693.15025	1453.94868	1362.45684	1213.64481	977.75018	1186.08702	1373.47995	1804.4837	1829.83686	1809.99525	1166.24542	1471.82707	1413.16316	1355.84297	2141.79097	1849.67846	1641.34161	1518.98505	1489.22265	1085.85385	1131.80921	867.28755	1071.98677	790.01553	960.23445	829.64362	1147.83682	1688.741	1923.78685	1956.10662	1514.70809	2267.2781
Aruba	NA	NA	NA	NA	NA	NA	0	0	0	0	0	0	0	0	0	0	0	0	0	0	0	0	0	0	0	0	0	0	0	0	0	0
Bahamas, The	0	31.96703	17.63698	0	0	0	0	0	0	0	0	0	0	0	0	0	0	0	0	0	0	0	0	0	0	0	0	0	0	0	0	0
Barbados	0	0	0	0	0	0	0	0	0	0	0	0	0	0	0	0	0	0	0	0	0	0	0	0	0	0	0	0	0	0	0	0
Belize	0	0	0	0	0	0	0	0	0	0	0	0	0	0	0	0	0	0	0	0	0	0	0	0	0	0	0	0	0	0	0	0
Bolivia	1.10231	1.10231	1.10231	1.10231	0	0	0	0	0	0	0	0	0	0	0	0	0	0	0	0	0	0	0	0	0	0	0	0	0	0	0	0
Brazil	10575.57518	10928.31482	11940.23665	12873.89437	15416.92667	18643.39202	18798.81793	19315.80195	19204.46851	19306.98346	16968.98107	19582.5613	18756.93009	18982.90392	19680.66701	20771.95526	21344.05485	21771.75166	21163.27579	22818.94745	24145.02802	23725.04739	22091.42196	22354.87437	24183.91756	23757.56558	23616.46972	24658.04373	24610.20341	19470.56647	25823.16479	27569.97555
Cayman Islands	0	0	0	0	0	0	0	0	0	0	0	0	0	0	0	0	0	0	0	0	0	0	0	0	0	0	0	0	0	0	0	0
Chile	1961.01191	1864.00851	1250.02108	1811.09756	2102.10776	2145.09791	1945.57955	2026.04828	2836.24713	3808.48575	4144.21672	3296.84021	2935.30083	2968.21584	3536.38019	3890.68511	5336.92863	6881.26685	6084.91303	6780.79117	5095.31301	3970.59166	4024.53877	3982.65094	5696.44748	5689.02893	6678.90453	6254.51465	9045.30246	7977.44936	9482.08231	8953.49095
Colombia	4399.32464	4563.56903	4706.86951	5202.90962	5123.5432	5101.49697	5202.90962	4315.54897	5564.46774	5173.14721	3041.53057	5511.14894	6179.00633	6352.98413	6069.11691	5046.51368	5273.12685	5563.69612	5675.36027	4382.23881	4043.55364	3581.40961	3587.58255	4104.44532	3217.15082	4568.89319	4176.65774	3288.41525	3927.53537	5049.39071	4968.1173	5532.05979
Costa Rica	1.10231	1.10231	1.10231	1.10231	1.10231	1.10231	1.10231	1.10231	1.10231	2.20462	2.20462	0.02205	0	0	0	0.27558	13.04034	0.35274	0.50706	0.46297	0.49604	0.70857	31.40485	84.95514	67.30713	33.06934	67.17485	137.78892	133.99697	116.38203	103.90387	107.87219
Cuba	174.16519	175.26751	169.75595	174.16519	184.086	151.01666	189.59755	202.82529	198.41604	253.53161	239.20157	125.66349	73.96509	92.70439	118.49847	108.46744	42.65945	33.73073	37.91951	40.12413	41.7776	28.3294	45.96638	26.29013	32.18749	45.42625	40.78552	44.57747	39.40763	30.46789	26.49957	26.88537
Dominica	0	0	0	0	0	0	0	0	0	0	0	0	0	0	0	0	0	0	0	0	0	0	0	0	0	0	0	0	0	0	0	0
Dominican Republic	0	0	0	7.71618	14.33005	246.91774	30.86472	255.73624	106.9242	11.02311	18.82858	214.06887	203.26621	237.43787	67.57169	87.96445	114.75061	116.51431	164.92783	257.49993	102.11812	223.31726	257.30152	1165.36357	856.6282	524.19314	892.79504	919.31665	957.51174	940.00703	897.95386	1089.05055
Ecuador	0	0	0	0	0	0	0	0	0	0	0	0.73083	0	0	0	0	0	0	0	0	0	0	0	0	0	0	0	0	0	0	0	0
El Salvador	1.10231	1.10231	1.10231	0	0	0	0	0	0	0	0	0.61509	0	1.10231	1.10231	1.10231	1.10231	1.10231	1.10231	1.10231	0.66139	1.10231	1.10231	1.10231	1.10231	1.10231	1.10231	0	0	0	0	0
Falkland Islands (Islas Malvinas)	0	0	0	0	0	0	0	0	0	0	0	0	0	0	0	0	0	0	0	0	0	0	0	0	0	0	0	0	0	0	0	0
French Guiana	0	0	0	0	0	0	0	0	0	0	0	0	0	0	0	0	0	0	0	0	0	0	0	0	0	0	0	0	0	0	0	0
Grenada	0	0	0	0	0	0	0	0	0	0	0	0	0	0	0	0	0	0	0	0	0	0	0	0	0	0	0	0	0	0	0	0
Guadeloupe	0	0	0	0	0	0	0	0	0	0	0	0	0	0	0	0	0	0	0	0	0	0	0	0	0	0	0	0	0	0	0	0
Guatemala	24.25085	23.14854	4.40925	3.30693	0	0	0	0	0	0	0	0	0	0	0	0	0	0	0	16.53467	237.32764	220.46227	429.73608	403.82074	469.15474	451.13195	472.29633	493.1741	497.67153	324.27796	541.66478	517.0171
Guyana	0	0	0	0	0	0	0	0	0	0	0	0	0	0	0	0	0	0	0	0	0	0	0	0	0	0	0	0	0	0	0	0
Haiti	0	0	40.78552	62.83175	66.13868	67.24099	19.8416	19.8416	34.17165	13.22774	13.22774	27.55778	28.6601	0	0	0	0	0	0	0	0	0	0	0	0	0	0	0	0	0	0	0
Honduras	0	1.10231	0	0	0	0	1.10231	1.10231	1.10231	1.10231	1.10231	0.5732	1.10341	1.10231	1.10231	1.10231	1.10231	1.10231	1.10231	61.56409	148.62464	135.70555	155.00702	185.93788	191.51558	201.72298	144.61223	141.77929	192.88244	189.32198	196.89486	259.51716
Jamaica	1.10231	1.10231	0	0	0	0	0	0	0	41.88783	57.32019	15.84903	70.66257	69.44562	58.4225	61.72944	94.79878	66.13868	63.93406	79.36642	58.4225	58.64296	97.0034	93.69647	102.51496	66.57961	35.27396	39.68321	52.56923	56.60369	59.52481	61.79557
Martinique	0	0	0	0	0	0	0	0	0	0	0	0	0	0	0	0	0	0	0	0	0	0	0	0	0	0	0	0	0	0	0	0
Montserrat	0	0	0	0	0	0	0	0	0	0	0	0	0	0	0	0	0	0	0	0	0	0	0	0	0	0	0	0	0	0	0	0
Netherlands Antilles	0	0	0	0	0	0	0	0	0	0	0	0	0	0	0	0	0	0	0	0	0	0	0	0	0	0	0	0	0	0	0	0
Nicaragua	0	0	0	0	0	0	0	0	0	0	0	0	0	0	0	0	0	0	0	0	0	0	40.3005	40.78552	77.52556	70.36053	108.12572	72.3006	66.59063	74.72569	75.47526	75.47526
Panama	2.20462	3.30693	3.30693	3.30693	9.9208	38.5809	8.81849	38.5809	28.6601	12.12542	35.27396	49.72967	54.01326	58.4225	59.52481	56.21788	110.23114	62.83175	62.83175	66.13868	66.13868	69.44562	49.60401	0	1.96211	1.96211	252.17577	246.41068	34.50235	69.02674	118.54256	87.44636
Paraguay	0	0	0	0	0	0	0	0	0	0	0	0	0	0	0	0	0	0	0	0	0	0	0	0	0	0.33069	0.22046	0.36376	0.31967	0.18739	0.18739	1.23459
Peru	253.03557	263.64532	286.9592	249.2326	232.61525	310.54867	290.45904	324.02442	382.28158	333.20117	256.80658	438.46639	425.87799	605.11933	551.49078	580.83652	606.97562	633.9569	691.52511	631.53622	980.9105	893.34399	1208.61827	1193.70399	1219.4099	1594.60361	1224.84429	1608.72422	1440.11468	1073.75047	1175.27335	1141.93945
Puerto Rico	0	0	0	188.49524	110.23114	110.23114	255.73624	322.97723	394.62747	328.48879	234.79232	211.64378	169.75595	176.36982	178.57444	181.88137	187.39293	190.69987	192.90449	176.36982	176.36982	170.85826	485.017	1521.18968	1433.00477	1466.07411	1653.46704	1653.46704	1653.46704	1653.46704	1653.46704	1653.46704
Saint Kitts and Nevis	0	0	0	0	0	0	0	0	0	0	0	0	0	0	0	0	0	0	0	0	0	0	0	0	0	0	0	0	0	0	0	0
Saint Lucia	0	0	0	0	0	0	0	0	0	0	0	0	0	0	0	0	0	0	0	0	0	0	0	0	0	0	0	0	0	0	0	0
Saint Vincent/Grenadines	0	0	0	0	0	0	0	0	0	0	0	0	0	0	0	0	0	0	0	0	0	0	0	0	0	0	0	0	0	0	0	0
Suriname	1.10231	1.10231	1.10231	1.10231	1.10231	0	0	0	0	0	0	0	0	0	0	0	0	0	0	0	0	0	0	0	0	0	0	0	0	0	0	0
Trinidad and Tobago	0	0	0	0	0	0	0	0	0	0	0	0	0	0	0	0	0	0	0	0	0	0	0	0	0	0	0	0	0	0	0	0
Turks and Caicos Islands	0	0	0	0	0	0	0	0	0	0	0	0	0	0	0	0	0	0	0	0	0	0	0	0	0	0	0	0	0	0	0	0
Uruguay	5.51156	4.40925	3.30693	2.20462	2.20462	1.10231	1.10231	1.10231	1.10231	1.10231	1.10231	0.55116	0.44092	2.28652	4.53601	3.64468	1.26766	1.27868	1.27868	1.94007	0.79366	1.59835	2.55736	1.92904	2.35895	3.04238	3.50535	4.29901	2.60145	3.00931	4.73994	2.84396
Venezuela	328.48879	281.0894	175.26751	227.07614	231.48539	317.46567	336.20496	256.83855	351.63732	372.58124	246.43273	0.68343	5.03756	42.97912	84.01817	7.95869	232.53258	52.01807	1463.08684	55.38012	198.98925	74.33988	27.09481	65.03637	212.29414	55.31398	173.14005	209.33995	212.88939	357.73311	328.48879	220.46227
Virgin Islands, U.S.	0	0	0	0	0	0	0	0	0	0	80.46873	135.5843	225.97383	253.53161	270.06628	275.57784	275.57784	277.78246	279.98709	281.0894	283.29402	0	0	0	0	0	0	0	0	0	0	0
Virgin Islands, British	0	0	0	0	0	0	0	0	0	0	0	0	0	0	0	0	0	0	0	0	0	0	0	0	0	0	0	0	0	0	0	0
Europe	1411973.33906	1425162.99051	1443056.06124	1469877.35794	1506731.6832	1573542.12433	1589874.99458	1604698.38171	1574036.15824	1589194.40551	1482448.82216	1328091.25639	1245142.25163	1175426.5719	1125881.50737	1110645.36362	1113703.52697	1087253.16465	1056649.41219	992479.92719	1043998.10424	1041959.57009	1031394.92983	1056309.98847	1051766.94448	1037860.31665	1057629.16857	1081549.32507	1034173.08515	959645.81413	966324.71866	1003697.48299
Albania	1715.19648	1912.51021	2094.39158	2267.45447	2474.689	2710.58363	2685.23047	2678.6166	2792.15467	2462.56358	2344.61626	1308.44358	371.47893	244.71312	187.55828	88.18491	124.56118	42.99014	54.01326	131.17505	80.46873	93.69647	99.20802	99.20802	99.20802	84.87797	84.87797	84.87797	108.02651	238.09925	263.45241	48.5017
Austria	7823.10372	8287.1768	7655.55239	7842.94532	9095.17103	9089.65947	7497.92187	7568.46979	7020.62105	7058.09964	8076.63533	8560.55002	6186.17135	5597.53708	5610.76482	6796.85184	6677.80222	6824.40963	5799.26006	6268.8447	6743.9409	7103.2944	7206.91167	7700.74716	7187.07006	7284.07346	6944.56157	6168.53437	5878.62648	4540.42049	5425.57651	5643.83416
Belgium	20031.20203	24571.62252	24386.43421	19876.87844	22667.9308	22385.73909	19535.16191	18345.76796	15013.48072	18145.14729	18033.81384	17035.67091	15458.81451	14080.92531	15081.82402	14416.02796	13932.11327	13530.87194	13599.21524	11901.65575	13326.94434	12249.98614	10587.70061	9881.11903	9638.61053	8655.3488	8201.19651	7330.37054	7490.20569	5176.45414	5488.40826	4443.41709
Bosnia and Herzegovina	NA	NA	NA	NA	NA	NA	NA	NA	NA	NA	NA	NA	16534.67039	14330.04767	1543.2359	1807.79063	1862.9062	6010.90384	7754.76041	7464.85253	8197.88958	8074.43071	8633.30257	9273.74547	9359.72575	9947.25771	10835.72066	10604.23528	12222.42835	12362.4219	12715.16153	13713.85562
Bulgaria	40742.53016	40439.80239	43737.01408	43823.79906	45319.33795	43649.32521	47026.80722	48852.23483	44872.89082	45551.91462	41626.58387	33121.48011	33519.19405	32206.34122	30765.51004	32736.23001	33079.26159	37642.83172	36833.70101	31913.67756	32261.34656	34665.77424	31701.00863	35124.33576	33834.21259	32335.20142	33283.18919	37165.5298	36385.09336	33241.30136	35992.67051	45184.84494
Croatia	NA	NA	NA	NA	NA	NA	NA	NA	NA	NA	NA	NA	790.35724	847.5672	574.08376	295.41944	429.24004	588.01146	467.04932	308.65269	899.78039	877.43984	1082.46976	1256.63495	1332.69443	1281.98811	1203.724	1294.11354	1330.48981	963.42013	1290.8066	1814.4045
Cyprus	0	0	0	0	57.32019	81.57104	60.62712	166.44902	100.31033	82.67335	119.04963	123.83476	28.6601	34.17165	29.76241	22.04623	12.12542	20.94392	28.6601	33.06934	54.01326	71.65024	58.4225	58.4225	63.93406	58.4225	60.62712	55.11557	45.19477	24.25085	29.76241	19.8416
Czech Republic	NA	NA	NA	NA	NA	NA	NA	NA	NA	NA	NA	NA	NA	78854.94542	72771.28902	71435.28765	71130.38833	70029.84067	64519.38618	56045.91876	67044.78151	64751.97388	62490.03097	64165.54424	60413.27637	62148.31445	63511.8736	64250.42221	59851.09758	56206.85622	56885.88002	54510.39904
Denmark	10739.81958	9236.26688	10646.12311	9595.62038	10262.51876	13500.00722	12973.10239	13409.61769	12505.72237	9957.17851	11074.92223	14948.44435	12216.9168	13063.49192	14343.27541	12175.02897	16590.88827	12323.841	10411.33079	8510.94601	7364.54219	7748.14655	7651.14315	10541.40353	8126.23934	6974.32397	10148.98069	8751.24988	7573.98135	7500.12649	7185.96775	6113.4188
Faroe Islands	0	0	0	0	0	0	0	0	0	0	0	0	0	0	0	0	0	0	0	0	0	0	0	0	0	0	0	0	0	0	0	0
Finland	8014.9059	6947.8685	4555.85285	4735.5296	5434.395	7082.35048	6232.46843	7504.53574	7276.35728	7193.68393	7091.16898	6982.2562	6077.04253	7195.88855	8983.83758	7508.94498	8812.53839	8203.40114	6219.24069	6224.75225	6311.83484	7263.12955	7805.46674	10352.90829	9468.85458	5643.83416	8995.96301	8402.91949	6045.0755	6293.09555	8184.66184	6467.26075
Former Czechoslovakia	134052.08443	133672.88932	134755.35908	137836.31933	143267.95855	140287.85979	140848.93628	139465.53552	136983.13034	129968.02085	119482.40529	107881.97817	101375.16649	NA	NA	NA	NA	NA	NA	NA	NA	NA	NA	NA	NA	NA	NA	NA	NA	NA	NA	NA
Former Serbia and Montenegro	NA	NA	NA	NA	NA	NA	NA	NA	NA	NA	NA	NA	42808.26165	41139.36225	37812.58657	45486.87825	44959.97342	47412.6162	49360.40037	36790.74394	45242.16513	45324.83848	47477.65257	50096.74436	50794.50745	46305.89559	NA	NA	NA	NA	NA	NA
Former Yugoslavia	48673.56118	58541.52964	62438.11211	68159.10806	76499.30604	81621.74693	81864.25543	82707.52362	84509.80269	85305.67149	83156.16434	81067.28431	NA	NA	NA	NA	NA	NA	NA	NA	NA	NA	NA	NA	NA	NA	NA	NA	NA	NA	NA	NA
France	55984.18933	50830.88372	51088.82458	46040.23855	44274.33576	42486.38673	34973.08762	30746.77075	24124.0841	32538.02671	33829.93562	35682.94086	31544.84418	25013.64937	24566.11096	25682.75237	27925.95598	24091.01476	28914.72927	25628.73911	24695.08139	20684.87266	22257.87097	23708.51272	22469.51475	23323.80606	21562.3125	22426.52461	21122.49027	18855.0358	20020.17891	17191.64796
Germany	NA	NA	NA	NA	NA	NA	NA	NA	NA	NA	NA	407944.49025	362204.08038	334978.09211	314276.68809	300723.69386	295808.56026	281005.62102	268773.83404	257561.66302	269814.87893	278151.73691	278407.2637	277307.36641	280407.06595	270789.39934	270533.6631	281443.23863	267881.50197	247866.83461	255957.79999	256661.07464
Germany, East	296752.13879	303080.5083	309555.48523	312280.39891	332735.99081	346788.25602	349571.5922	350139.28255	348809.89505	340356.26924	321263.13418	NA	NA	NA	NA	NA	NA	NA	NA	NA	NA	NA	NA	NA	NA	NA	NA	NA	NA	NA	NA	NA
Germany, West	238281.46573	240606.97893	235831.72203	235910.03023	240555.77657	227079.82178	224532.35818	214719.03131	212853.81025	212875.99978	212419.01456	NA	NA	NA	NA	NA	NA	NA	NA	NA	NA	NA	NA	NA	NA	NA	NA	NA	NA	NA	NA	NA
Gibraltar	0	0	0	0	0	0	0	0	0	0	0	0	0	0	0	0	0	0	0	0	0	0	0	0	0	0	0	0	0	0	0	0
Greece	25628.73911	30168.05729	30599.06103	36044.47915	36249.50906	41908.77558	43946.94928	49019.78616	56218.98165	58635.24815	58946.09995	58544.85862	62202.32771	62447.04083	65507.05716	64434.50821	65721.34649	66147.50006	68238.58471	68321.25806	72406.42396	75493.99808	76814.56709	78160.48926	78964.07424	77892.6276	71720.7863	73948.55755	71822.19894	72257.61193	64285.69618	66193.79714
Hungary	31469.887	31378.39516	32021.04268	30599.06103	30967.23302	28958.82173	29304.94749	29117.55456	26977.96821	25347.64971	22945.71326	22318.4981	21025.48687	19625.55145	18561.82098	18408.5997	19142.73907	18764.64627	18051.45082	18306.08475	16578.76285	16868.67073	15850.13504	16362.70982	14981.51369	12924.60069	13059.08268	13019.39947	12757.04936	11655.84032	11822.28933	12423.04902
Iceland	30.86472	50.70632	52.91095	76.05948	105.82189	113.53807	125.66349	101.41265	103.61727	108.02651	104.71958	106.9242	74.95717	74.95717	112.43576	91.49184	106.9242	93.69647	110.23114	95.90109	163.14208	154.32359	160.93746	152.11897	171.96057	165.3467	147.70972	177.47213	155.4259	142.19817	149.91434	146.60741
Ireland	1177.26853	1431.90246	1451.74406	1715.19648	1652.36473	1774.72129	2554.05542	3597.94428	3625.50206	3645.34367	3600.1489	3580.3073	3284.88785	3247.40927	3039.12202	3020.33313	3365.35658	3142.68969	3266.14856	2807.58703	3330.08262	3408.34672	3176.86134	3187.88445	3269.45549	3359.84502	3002.69614	2773.41538	2625.70566	2183.6788	2179.26956	2350.12782
Italy	19244.15171	20888.80026	22741.78566	20135.9216	24671.93285	26875.45326	23564.10993	24713.82068	23366.7962	23089.01374	24772.24318	23181.60789	20369.61161	17725.16666	18711.73533	19966.16566	18319.31248	18433.95287	19261.7887	19209.98006	20480.94506	21904.02903	22747.29722	24754.6062	27794.78093	27497.15686	27796.98555	27974.45768	27203.94204	21057.4539	23370.10313	25264.97636
Luxembourg	2924.43204	2366.66249	2175.96262	2002.89974	2304.93305	2255.32904	2063.52687	1675.51327	1760.39124	1846.37153	1822.12068	1715.19648	1618.19308	1670.00171	1450.64175	819.01734	766.10639	487.22162	167.55133	168.65364	190.69987	211.64378	126.76581	97.0034	141.09585	135.5843	163.14208	134.48199	136.68661	124.56118	124.56118	109.12882
Macedonia	NA	NA	NA	NA	NA	NA	NA	NA	NA	NA	NA	NA	7503.43342	7618.07381	7975.22269	8195.68496	8082.14689	8314.73458	9370.74887	8498.82058	8660.86035	9353.11189	8092.06769	8305.91609	8291.58605	8151.5925	7464.85253	7561.85593	8368.74784	8159.30868	7557.44668	6599.53811
Malta	1.10231	1.10231	26.45547	57.32019	103.61727	233.69001	160.93746	200.62067	270.06628	334.00034	330.69341	267.86166	225.97383	330.69341	231.48539	40.78552	0	0	0	0	0	0	0	0	0	0	0	0	0	0	0	0
Montenegro	NA	NA	NA	NA	NA	NA	NA	NA	NA	NA	NA	NA	NA	NA	NA	NA	NA	NA	NA	NA	NA	NA	NA	NA	NA	NA	1585.12374	1283.09042	1903.69172	1032.86574	2060.21993	2060.21993
Netherlands	6654.65368	7654.45008	6193.88753	8596.92629	10865.48307	10868.79	10975.71421	11426.55955	13665.35392	13852.74686	14947.34204	13614.6476	13358.91137	13791.01742	15023.40152	15631.87739	15734.39235	15682.58371	15807.1449	13113.09593	14161.39404	14751.13061	14802.93925	15156.78119	14925.29581	14209.89574	13681.88859	14858.05482	14061.0837	13191.36004	13247.57792	13062.38961
Norway	1601.65841	1490.32496	1498.04114	1499.14345	1822.12068	1857.39464	1651.26242	1570.79369	1611.57921	1586.22605	1408.75392	1280.8858	1254.43033	1388.91231	1612.68152	1673.30864	1641.34161	1682.12713	1750.47044	1736.14039	1757.08431	1543.2359	1329.3875	1289.70429	1515.67812	1268.76037	1165.14311	1315.05745	1404.34467	917.12305	1370.17302	1363.55915
Poland	221122.55641	199836.92406	208031.5067	212671.13522	226960.39737	238406.79853	247267.17724	258260.52842	253079.66503	242054.34682	202177.13107	201676.80738	191766.90259	193421.47195	183862.22784	184591.95796	188789.55961	181895.70437	168152.08634	161761.98739	158488.02344	151770.10812	149948.75906	154154.9367	153518.90304	150165.67189	154818.52813	149579.24224	148914.54849	140908.46109	147870.65964	152987.58897
Portugal	777.57043	697.54263	579.26462	731.05289	691.14922	1297.42047	2478.98802	3184.13659	3712.3642	4528.29506	4857.88616	5094.29337	5196.18552	5490.61288	5776.11152	6253.41234	5994.36917	6046.17781	5495.02213	6705.36	6730.71316	5685.72199	6271.04932	5921.61662	6086.96333	6041.76856	6030.74545	5231.56971	4585.61526	5158.81716	2981.75223	4076.34741
Romania	44974.30347	48465.25741	48614.68673	57344.33131	57805.09746	60348.24	62070.05034	67078.95316	76168.61263	77723.97396	51971.77598	43321.93874	48619.64713	48853.33714	49507.00778	50193.74776	50123.19983	42065.30379	34568.48423	30790.86321	35648.74937	38170.83776	38363.74225	41821.69298	40411.83675	40325.85647	45193.66343	44505.82114	44472.7518	38683.41254	35946.37343	41750.04274
Serbia	NA	NA	NA	NA	NA	NA	NA	NA	NA	NA	NA	NA	NA	NA	NA	NA	NA	NA	NA	NA	NA	NA	NA	NA	NA	NA	47511.82422	47647.40852	49572.04415	50394.36842	49314.10329	53053.14342
Slovakia	NA	NA	NA	NA	NA	NA	NA	NA	NA	NA	NA	NA	NA	15933.9107	13710.54869	13948.64794	13561.73666	12383.36581	11529.07451	10876.50618	9896.55139	10122.52521	9693.7261	10227.24479	9845.84506	9290.28014	9555.93718	8824.00243	8992.65607	8567.16389	8415.04492	8288.27911
Slovenia	NA	NA	NA	NA	NA	NA	NA	NA	NA	NA	NA	NA	6380.17815	6357.02961	5760.67916	5809.18086	5635.01567	6196.09215	5938.15129	5497.22675	5507.14755	5795.95313	6232.46843	5962.40214	5993.26686	5788.23695	5827.92016	5857.68256	5772.80459	5480.69208	5461.95279	5544.62614
Spain	34073.54643	45245.47206	50081.312	52697.09685	52113.97414	53695.79095	51971.77598	50333.7413	42279.15219	53343.05131	51630.05946	52481.01076	52225.30759	48995.53531	47526.15427	47590.08832	40482.38468	45212.40272	43727.58932	47794.01593	49721.95849	45634.58797	50532.15734	46675.1699	49592.98807	48350.68316	42539.29768	46144.95813	28553.17115	21487.35533	15929.50146	25481.02939
Sweden	2830.73557	2451.54046	2730.42524	3473.38309	4182.1693	4903.08093	5052.99527	4963.70805	4932.84333	4455.54252	4463.25869	4175.55543	3870.21518	3960.60471	4326.00274	4178.86236	4447.82634	3807.38344	3636.52518	3504.24781	3538.41946	3966.11627	4003.59486	3728.01702	4117.13293	3703.76617	3836.04353	3831.63429	3310.24101	2519.88377	3401.73286	3464.5646
Switzerland	491.63087	741.85554	666.89837	579.81578	799.17574	795.8688	693.35385	642.64752	552.25799	572.0996	586.42964	493.83549	346.12577	287.70326	291.0102	311.95411	234.79232	180.77906	149.91434	157.63052	227.07614	243.61081	224.87152	231.48539	221.56458	261.24779	271.16859	318.56798	287.70326	267.86166	271.16859	278.88477
Turkey	22599.58749	23822.05079	26490.74659	29969.64124	35238.68954	46190.1529	55219.18524	53965.19584	46012.68077	60648.06869	59989.98881	63546.04525	65960.10713	60476.10812	65569.88891	67339.09864	73280.55687	80095.04569	86283.42167	83690.78535	88845.19327	80291.25712	73237.56673	71061.6041	71420.95761	85232.91894	92449.75141	108917.18081	108836.71208	108913.87388	105732.60329	112496.3858
United Kingdom	133560.45357	130343.90902	122355.4586	123315.57179	87553.28435	116294.95074	122972.75296	128541.62995	122836.06635	125929.15202	119377.0133	118033.60881	110743.71073	96144.70129	90779.74529	78971.50382	76928.10516	68894.45997	68409.44297	60659.0918	65627.2091	69529.39131	64327.58401	69491.91273	67307.13161	68261.73325	74440.18842	69668.28254	64501.7492	53273.60569	55392.24813	54890.69646
Eurasia	751332.11572	748106.75268	770504.6172	763734.22083	769601.82419	778867.85348	802557.62691	806942.6215	821181.17733	777312.49215	848468.89503	672436.38478	599096.3031	550150.3718	494222.40036	460728.6697	441919.93097	402248.18606	387255.20834	390117.91094	395230.43102	374136.60085	386141.87387	403126.28729	396990.82227	397902.43376	414774.43348	413431.68596	438614.98105	410404.40828	432443.36021	449071.72707
Armenia	NA	NA	NA	NA	NA	NA	NA	NA	NA	NA	NA	NA	155.4259	3.30693	39.68321	110.23114	110.23114	110.23114	132.27736	154.32359	143.30048	154.32359	132.27736	121.25425	110.23114	88.18491	77.18384	110.23114	66.13868	66.13868	55.11557	66.13868
Azerbaijan	NA	NA	NA	NA	NA	NA	NA	NA	NA	NA	NA	NA	29.76241	7.71618	8.81849	12.12542	12.12542	6.61387	1.10231	0	0	0	0	0	0	0	0	0	0	0	0	0
Belarus	NA	NA	NA	NA	NA	NA	NA	NA	NA	NA	NA	NA	2050.29913	1772.51667	1321.67132	1240.10028	1230.17948	892.8722	925.94154	662.48913	650.3637	575.40653	458.56153	415.57138	357.14888	271.16859	235.89463	180.77906	168.65364	159.83515	165.3467	144.40279
Estonia	NA	NA	NA	NA	NA	NA	NA	NA	NA	NA	NA	NA	23604.89545	17286.44674	17102.36074	14699.32198	16571.04667	16533.56808	15362.91342	14053.36752	14658.53646	14689.40118	14393.98173	17077.00758	17114.48617	16339.56128	15504.00927	18629.06198	17415.41717	15253.78459	19761.13574	20706.91889
Former U.S.S.R.	751332.11572	748106.75268	770504.6172	763734.22083	769601.82419	778867.85348	802557.62691	806942.6215	821181.17733	777312.49215	848468.89503	672436.38478	NA	NA	NA	NA	NA	NA	NA	NA	NA	NA	NA	NA	NA	NA	NA	NA	NA	NA	NA	NA
Georgia	NA	NA	NA	NA	NA	NA	NA	NA	NA	NA	NA	NA	580.91809	311.95411	403.44596	48.5017	27.55778	19.18022	38.5809	30.86472	29.76241	25.35316	25.35316	54.01326	15.43236	19.8416	17.63698	52.91095	131.17505	249.12237	124.56118	98.10571
Kazakhstan	NA	NA	NA	NA	NA	NA	NA	NA	NA	NA	NA	NA	100107.50843	91505.07058	87641.46926	72361.2292	64720.00685	54227.10502	54343.95002	50989.61656	49238.04381	52736.78006	54317.49455	59202.9385	69144.68465	71368.04666	76565.44472	81095.94441	87042.91419	80357.3958	86714.42541	92076.06786
Kyrgyzstan	NA	NA	NA	NA	NA	NA	NA	NA	NA	NA	NA	NA	2734.83448	2444.9266	2237.69206	1298.52278	1119.94834	1356.94528	1350.33142	1343.71755	1288.60198	874.13291	1369.07071	1612.68152	1585.12374	1477.09722	1381.19613	1122.15296	1100.10674	1141.99457	1263.24882	1553.15671
Latvia	NA	NA	NA	NA	NA	NA	NA	NA	NA	NA	NA	NA	554.46261	669.103	473.99388	286.60095	272.27091	229.28076	173.06288	152.11897	119.04963	152.11897	123.45887	117.94732	112.43576	139.99354	149.91434	182.98369	184.086	148.81203	187.39293	304.23794
Lithuania	NA	NA	NA	NA	NA	NA	NA	NA	NA	NA	NA	NA	725.32087	731.93474	531.31408	410.05983	379.19511	300.931	259.04317	210.54147	158.73284	143.30048	246.91774	314.15874	306.44256	336.20496	466.27771	445.22356	375.66771	277.34154	354.94426	406.75289
Moldova	NA	NA	NA	NA	NA	NA	NA	NA	NA	NA	NA	NA	2958.60369	2574.99934	2534.21382	1500.24576	1300.7274	731.93474	621.70361	263.45241	210.54147	165.3467	176.36982	249.12237	207.23454	186.29062	213.8484	144.40279	218.25765	199.51836	205.02991	169.75595
Russia	NA	NA	NA	NA	NA	NA	NA	NA	NA	NA	NA	NA	325763.87146	312686.04949	284421.68392	270035.41837	278241.02413	253145.80372	238254.67956	247123.87676	252511.97468	230629.99189	240234.43076	243426.72446	235114.1945	233491.59218	240254.27237	230401.81343	249795.87949	243601.99196	248728.8421	256690.83705
Tajikistan	NA	NA	NA	NA	NA	NA	NA	NA	NA	NA	NA	NA	508.16554	144.40279	88.18491	37.47859	22.04623	44.09245	35.27396	26.45547	33.06934	35.27396	48.5017	61.72944	111.33345	116.845	123.45887	209.43916	229.28076	238.09925	240.30388	225.97383
Turkmenistan	NA	NA	NA	NA	NA	NA	NA	NA	NA	NA	NA	NA	551.15568	440.92454	440.92454	220.46227	110.23114	60.62712	0	0	0	0	0	0	0	0	0	0	0	0	0	0
Ukraine	NA	NA	NA	NA	NA	NA	NA	NA	NA	NA	NA	NA	132331.3764	114773.76107	92090.39791	94668.70418	74109.49501	71511.34714	72537.59901	71912.58847	72349.10377	70000.07826	70665.87433	77432.96376	69248.30192	70633.9073	76103.57626	76964.48143	78009.4726	64502.85151	70866.49499	73401.81112
Uzbekistan	NA	NA	NA	NA	NA	NA	NA	NA	NA	NA	NA	NA	6439.70296	4797.25904	4886.54626	3799.66726	3693.84537	3077.65332	3218.74917	3194.49832	3839.35047	3955.09316	3949.5816	3040.17473	3563.77263	3433.69988	3681.71994	3892.26141	3877.93136	4207.52246	3776.51872	3227.56766
Middle East	1075.85589	1254.43033	2320.36541	3064.42558	4388.30152	4726.71111	5105.90622	5189.68188	5200.70499	5456.44123	5565.57005	6189.62489	7312.73356	7747.04423	8788.72847	9296.89401	10870.99463	11850.94943	12606.03271	12549.92506	14245.94132	14703.18007	16007.65533	16469.96472	16457.06767	16305.38963	17260.43219	17750.51982	17158.57862	15232.84068	16316.41274	16811.35054
Bahrain	0	0	0	0	0	0	0	0	0	0	0	0	0	0	0	0	0	0	0	0	0	0	0	0	0	0	0	0	0	0	0	0
Iran	1058.21891	837.75663	1304.03434	1197.11014	1423.08397	1490.32496	1556.46364	1587.32836	1609.37458	1629.21619	1461.66486	1709.68492	1793.46058	1386.70769	2049.19682	1849.67846	1998.49049	2087.77771	2130.76786	2320.36541	2343.51395	1814.4045	2035.96908	2283.98914	2203.52041	2716.09519	2714.99288	2871.52109	2669.79811	1948.88648	2367.7648	2579.40858
Iraq	1.10231	1.10231	1.10231	1.10231	1.10231	1.10231	1.10231	1.10231	1.10231	1.10231	2.20462	1.10231	0	0	0	0	0	0	0	0	0	0	0	0	0	0	0	0	0	0	0	0
Israel	5.51156	399.03671	1000.89871	1857.39464	2958.60369	3233.07922	3547.23795	3600.1489	3589.12579	3826.12273	4101.70057	4476.48643	5517.06835	6235.77536	6613.86816	7241.08332	8641.01875	9525.07246	10249.29102	10003.58582	11674.24892	12661.69943	13743.5078	13961.10406	14028.67575	13364.42292	14320.5678	14654.12721	14263.90899	13059.08268	13569.45284	13908.96473
Jordan	0	0	0	0	0	0	0	0	0	0	0	0	0	0	0	0	0	0	0	0	0	0	0	0	0	0	0	0	0	0	0	0
Kuwait	0	0	0	0	0	0	0	0	0	0	0	0	0	0	0	0	0	0	0	0	0	0	0	0	0	0	0	0	0	0	0	0
Lebanon	6.61387	6.61387	3.30693	0	0	0	0	0	0	0	0	0	0	122.35656	123.45887	203.9276	225.97383	225.97383	220.46227	220.46227	220.46227	220.46227	220.46227	220.46227	220.46227	220.46227	220.46227	220.46227	220.46227	220.46227	374.78586	318.56798
Oman	0	0	0	0	0	0	0	0	0	0	0	0.14661	0	0	0	0	0	0	0	0	0	0	0	0	0	0	0	0	0	0	0	0
Palestinian Territories	NA	NA	NA	NA	NA	NA	NA	NA	NA	NA	NA	NA	NA	NA	NA	NA	NA	7.71618	0	1.10231	3.30693	2.20462	4.40925	0	0	0	0	0	0	0	0	0
Qatar	0	0	0	0	0	0	0	0	0	0	0	0	0	0	0	0	0	0	0	0	0	0	0	0	0	0	0	0	0	0	0	0
Saudi Arabia	0	0	0	0	0	0	0	0	0	0	0	0	0	0	0	0	0	0	0	0	0	0	0	0	0	0	0	0	0	0	0	0
Syria	4.40925	9.9208	11.02311	8.81849	5.51156	2.20462	1.10231	1.10231	1.10231	0	0	2.20462	2.20462	2.20462	2.20462	2.20462	5.51156	4.40925	5.51156	4.40925	4.40925	4.40925	3.30693	4.40925	4.40925	4.40925	4.40925	4.40925	4.40925	4.40925	4.40925	4.40925
United Arab Emirates	0	0	0	0	0	0	0	0	0	0	0	0	0	0	0	0	0	0	0	0	0	0	0	0	0	0	0	0	0	0	0	0
Yemen	0	0	0	0	0	0	0	0	0	0	0	0	0	0	0	0	0	0	0	0	0	0	0	0	0	0	0	0	0	0	0	0
Africa	113241.78197	125306.68672	132648.39894	137095.12738	147423.40562	151607.06855	156341.45175	160973.21857	164305.59731	153102.85546	152282.54731	157202.73942	160920.47628	160018.37994	174172.62108	175451.98128	177267.96869	184060.11014	174147.43414	182704.01022	188935.96872	192584.03311	185264.56354	200122.67799	212890.55272	207929.77593	210545.52618	215899.13675	230678.36902	224393.82741	222542.95294	214972.27852
Algeria	672.40993	795.8688	821.22196	1299.62509	1660.08091	1264.35113	1122.15296	1221.36099	1223.56561	1229.07717	1205.92863	1183.8824	998.69409	960.11319	842.16588	1056.01428	652.56832	593.04351	912.71381	946.88546	856.49593	910.50918	1129.86914	1212.5425	1276.47655	1119.94834	1073.65126	1236.79335	1235.69103	685.63767	552.25799	552.25799
Angola	0	0	0	0	0	0	0	0	0	0	0	0	0	0	0	0	0	0	0	0	0	0	0	0	0	0	0	0	0	0	0	0
Benin	0	0	0	0	0	0	0	0	0	0	0	0	0	0	0	0	0	0	0	0	0	0	0	0	0	0	0	0	0	0	0	0
Botswana	408.95751	443.12917	478.40313	460.76615	462.97077	513.73552	585.73849	688.29313	698.72541	748.51902	901.73589	883.91372	1003.60158	992.08022	1004.53414	1005.73015	857.86279	878.45066	1125.57013	1144.19919	1146.40381	1051.60504	1078.06051	935.86234	1027.35419	1104.51598	1079.16282	929.24848	1007.51258	817.91503	1092.39056	813.50578
Burkina Faso	0	0	0	0	0	0	0	0	0	0	0	0	0	0	0	0	0	0	0	0	0	0	0	0	0	0	0	0	0	0	0	0
Burundi	0	0	0	0	0	0	0	0	0	0	0	0	0	0	0	0	0	0	0	0	0	0	0	0	0	0	0	0	0	0	0	0
Cameroon	0	1.10231	1.10231	1.10231	1.10231	2.20462	1.10231	1.10231	1.10231	1.10231	1.10231	1.10231	1.10231	1.10231	1.10231	1.10231	1.10231	1.10231	1.10231	1.10231	1.10231	0	0	0	0	0	0	0	0	0	0	0
Cape Verde	0	0	0	0	0	0	0	0	0	0	0	0	0	0	0	0	0	0	0	0	0	0	0	0	0	0	0	0	0	0	0	0
Central African Republic	0	0	0	0	0	0	0	0	0	0	0	0	0	0	0	0	0	0	0	0	0	0	0	0	0	0	0	0	0	0	0	0
Chad	0	0	0	0	0	0	0	0	0	0	0	0	0	0	0	0	0	0	0	0	0	0	0	0	0	0	0	0	0	0	0	0
Comoros	0	0	0	0	0	0	0	0	0	0	0	0	0	0	0	0	0	0	0	0	0	0	0	0	0	0	0	0	0	0	0	0
Congo (Brazzaville)	0	0	0	0	0	0	0	0	0	0	0	0	0	0	0	0	0	0	0	0	0	0	0	0	0	0	0	0	0	0	0	0
Congo (Kinshasa)	281.0894	289.90789	273.37322	262.3501	265.65704	268.96397	277.78246	282.19171	315.26105	275.57784	241.40619	251.32699	255.73624	263.45241	267.86166	320.77261	273.37322	273.37322	276.68015	276.68015	256.83855	251.32699	259.04317	274.47553	292.11251	310.8518	326.28416	347.22808	368.17199	378.0928	405.65058	397.9344
Cote dIvoire (IvoryCoast)	0	0	0	0	0	0	0	0	0	0	0	0	0	0	0	0	0	0	0	0	0	0	0	0	0	0	0	0	0	0	0	0
Djibouti	0	0	0	0	0	0	0	0	0	0	0	0	0	0	0	0	0	0	0	0	0	0	0	0	0	0	0	0	0	0	0	0
Egypt	864.21211	1367.9684	1535.51972	1075.85589	1076.9582	1096.7998	1213.64481	1394.42387	1230.17948	1372.37764	1606.06765	1287.4677	1248.42273	1632.66642	1719.73249	1184.98471	1639.13699	1373.47995	1340.41061	1208.13325	1515.67812	1295.21585	1420.87934	1472.68798	1502.45038	1468.27873	1435.20939	1404.34467	1373.47995	1350.33142	1316.15976	1316.15976
Equatorial Guinea	0	0	0	0	0	0	0	0	0	0	0	0	0	0	0	0	0	0	0	0	0	0	0	0	0	0	0	0	0	0	0	0
Eritrea	NA	NA	NA	NA	NA	NA	NA	NA	NA	NA	NA	NA	NA	NA	0	0	0	0	0	0	0	0	0	0	0	0	0	0	0	0	0	0
Ethiopia	0	0	0	0	0	0	0	0	0	0	0	0	0	0	0	0	0	0	0	0	0	0	0	0	0	0	0	0	0	0	0	0
Gabon	0	0	0	0	0	0	0	0	0	0	0	0	0	0	0	0	0	0	0	0	0	0	0	0	0	0	0	0	0	0	0	0
Gambia, The	0	0	0	0	0	0	0	0	0	0	0	0	0	0	0	0	0	0	0	0	0	0	0	0	0	0	0	0	0	0	0	0
Ghana	2.20462	2.20462	2.20462	2.20462	2.20462	2.20462	2.20462	3.30693	3.30693	3.30693	3.30693	3.30693	3.30693	3.30693	3.30693	3.30693	3.30693	3.30693	0	0	0	0	0	0	0	0	0	0	0	0	0	0
Guinea	0	0	0	0	0	0	0	0	0	0	0	0	0	0	0	0	0	0	0	0	0	0	0	0	0	0	0	0	0	0	0	0
Guinea-Bissau	0	0	0	0	0	0	0	0	0	0	0	0	0	0	0	0	0	0	0	0	0	0	0	0	0	0	0	0	0	0	0	0
Kenya	19.8416	99.20802	36.37627	101.41265	131.17505	95.90109	94.79878	101.41265	125.66349	145.5051	167.55133	146.60741	175.26751	145.5051	136.68661	106.9242	98.10571	101.41265	81.57104	79.36642	72.75255	72.75255	109.12882	101.41265	119.04963	98.10571	132.27736	121.25425	120.15194	104.71958	110.23114	106.9242
Lesotho	0	0	0	0	0	0	0	0	0	0	0	0	0	0	0	0	0	0	0	0	0	0	0	0	0	0	0	0	0	0	0	0
Liberia	0	0	0	0	0	0	0	0	0	0	0	0	0	0	0	0	0	0	0	0	0	0	0	0	0	0	0	0	0	0	0	0
Libya	1.10231	1.10231	1.10231	1.10231	1.10231	1.10231	2.20462	2.20462	2.20462	4.40925	5.51156	5.51156	5.51156	4.40925	5.51156	5.51156	5.51156	5.51156	0	0	0	0	0	0	0	0	0	0	0	0	0	0
Madagascar	11.02311	13.22774	13.22774	12.12542	7.71618	4.40925	12.12542	13.22774	13.22774	14.33005	14.33005	14.33005	14.33005	15.43236	13.22774	11.02311	11.02311	13.22774	13.22774	8.81849	11.02311	11.02311	11.02311	11.02311	11.02311	18.80984	16.62396	11.24688	14.58578	15.93612	16.53467	16.53467
Malawi	71.65024	52.91095	67.24099	48.5017	45.19477	36.37627	30.86472	30.86472	17.63698	12.12542	19.8416	12.12542	13.22774	16.53467	18.73929	18.73929	18.73929	18.73929	14.21982	60.54996	68.56377	51.56613	75.00126	70.61407	67.13076	65.25683	65.1466	67.46146	56.62573	52.91095	55.11557	55.11557
Mali	0	0	0	0	0	0	0	0	0	0	0	0	0	0	0	0	0	0	0	0	0	0	0	0	0	0	0	0	0	0	0	0
Mauritania	6.61387	6.61387	7.71618	7.71618	7.71618	7.71618	5.51156	6.61387	6.61387	6.61387	6.61387	6.61387	6.61387	6.61387	6.61387	4.40925	3.30693	2.20462	1.10231	0	0	0	0	0	0	0	0	0	0	0	0	0
Mauritius	1.10231	2.20462	1.10231	15.43236	26.45547	39.68321	50.70632	41.88783	45.19477	82.67335	82.67335	72.75255	79.36642	69.44562	38.5809	69.44562	45.19477	49.60401	78.26411	149.91434	279.3257	329.03994	345.02346	348.77131	318.34752	401.24133	534.62101	631.62441	718.70701	656.97757	736.34399	728.62781
Morocco	1459.46024	1527.80354	1650.16011	1868.41775	1817.71143	1876.13393	2526.49764	2580.51089	2544.13462	2544.13462	2527.59995	2860.49798	2565.07853	2878.13496	3163.6336	3615.58126	4176.65774	3831.63429	4369.56223	4008.0041	4463.25869	5625.09487	5762.88379	5390.30255	5132.36169	5443.21349	5429.98576	5532.50071	4918.51329	4518.37426	4655.06087	5357.23321
Mozambique	317.46567	324.07954	267.86166	199.51836	137.78892	116.845	112.43576	69.44562	71.65024	70.54793	63.93406	68.3433	66.13868	66.13868	66.13868	61.72944	0	0	0	0	0	0	0	0	0	0	0	9.9208	11.02311	11.02311	11.02311	36.37627
Namibia	NA	NA	NA	NA	NA	NA	NA	NA	NA	NA	0	16.53467	13.22774	99.20802	110.23114	17.63698	15.43236	12.12542	18.73929	6.61387	3.30693	4.40925	0	8.81849	1.10231	22.04623	70.54793	84.87797	455.25459	212.74609	149.91434	149.91434
Niger	22.04623	33.06934	49.60401	143.30048	165.3467	166.44902	136.68661	180.77906	170.85826	188.49524	189.59755	189.59755	187.39293	189.59755	189.59755	190.69987	190.69987	191.80218	191.80218	192.90449	174.38566	180.00745	201.61275	208.22662	255.51467	206.71865	187.2816	200.67799	198.39951	246.62894	248.09942	248.09942
Nigeria	198.41604	132.27736	67.24099	63.93406	83.77566	154.32359	123.45887	119.04963	67.24099	60.62712	69.44562	78.0723	104.71958	39.68321	35.27396	29.76241	16.53467	18.73929	20.94392	23.14854	8.81849	3.30693	47.39939	25.35316	3.30693	8.81849	8.81849	8.81849	12.12542	8.81849	8.81849	8.81849
Reunion	0	0	0	0	0	0	0	0	0	0	0	0	0	0	0	0	0	0	0	0	0	0	0	0	0	0	0	0	0	0	0	0
Rwanda	0	0	0	0	0	0	0	0	0	0	0	0	0	0	0	0	0	0	0	0	0	0	0	0	0	0	0	0	0	0	0	0
Saint Helena	0	0	0	0	0	0	0	0	0	0	0	0	0	0	0	0	0	0	0	0	0	0	0	0	0	0	0	0	0	0	0	0
Sao Tome and Principe	0	0	0	0	0	0	0	0	0	0	0	0	0	0	0	0	0	0	0	0	0	0	0	0	0	0	0	0	0	0	0	0
Senegal	0	0	0	0	0	0	0	0	0	0	0	0	0	0	0	0	0	0	0	0	0	0	0	0	139.99354	167.55133	184.086	236.99694	236.99694	279.98709	291.0102	393.52516
Seychelles	0	0	0	0	0	0	0	0	0	0	0	0	0	0	0	0	0	0	0	0	0	0	0	0	0	0	0	0	0	0	0	0
Sierra Leone	0	0	0	0	0	0	0	0	0	0	0	0	0	0	0	0	0	0	0	0	0	0	0	0	0	0	0	0	0	0	0	0
Somalia	0	0	0	0	0	0	0	0	0	0	0	0	0	0	0	0	0	0	0	0	0	0	0	0	0	0	0	0	0	0	0	0
South Africa	104765.87623	116367.70329	123517.29477	127346.72443	137489.09125	141768.26395	144634.27348	148041.5179	151315.38263	140487.37815	139081.93117	143638.51044	147390.00007	146389.68118	160745.00375	162260.56282	163936.28883	171665.19784	160838.7432	169104.48335	175009.56531	177859.04017	170121.91674	185925.87044	198819.95585	193348.7194	196079.14463	201156.39075	216854.40683	211824.56009	209403.88435	201403.3085
Sudan and South Sudan	0	0	0	0	0	0	0	0	0	0	0	0	0	0	0	0	0	0	0	0	0	0	0	0	0	0	0	0	0	0	0	0
Swaziland	194.0068	180.77906	180.77906	112.43576	137.78892	182.98369	189.59755	181.88137	181.88137	181.88137	176.36982	135.72209	110.78229	54.83999	200.89625	188.77082	142.61153	234.41511	234.41511	242.98988	221.58674	225.65228	203.08709	180.52178	175.41213	116.75175	170.41734	177.40445	182.21207	141.5941	146.04523	146.04523
Tanzania	2.20462	2.20462	2.20462	4.40925	3.30693	4.40925	4.40925	3.30693	3.30693	3.30693	4.40925	4.40925	4.40925	48.5017	50.70632	48.5017	62.83175	30.86472	49.60401	82.67335	87.0826	85.98029	87.0826	60.62712	71.65024	82.67335	88.18491	94.79878	101.41265	108.02651	115.74269	109.12882
Togo	0	0	0	0	0	0	0	0	0	0	0	0	0	0	0	0	0	0	0	0	0	0	0	0	0	0	0	0	0	0	0	0
Tunisia	99.20802	114.64038	79.36642	115.74269	119.04963	113.53807	102.51496	114.64038	138.89123	135.5843	121.25425	124.53473	127.86812	131.17505	121.25425	109.12882	119.04963	119.04963	95.90109	136.68661	128.97043	117.94732	100.31033	28.6601	0	0	0	0	0	0	0	0
Uganda	0	0	0	0	0	0	0	0	0	0	0	0	0	0	0	0	0	0	0	0	0	0	0	0	0	0	0	0	0	0	0	0
Western Sahara	0	0	0	0	0	0	0	0	0	0	0	0	0	0	0	0	0	0	0	0	0	0	0	0	0	0	0	0	0	0	0	0
Zambia	657.21126	560.31478	667.55755	500.01064	560.25857	546.26142	597.67322	504.89388	566.20333	447.01261	344.31357	355.48439	449.89626	353.69534	155.05773	156.99118	252.07766	350.42478	226.83363	137.69633	141.09585	146.60741	151.01666	159.83515	119.04963	154.32359	63.93406	15.43236	1.10231	1.10231	1.10231	1.10231
Zimbabwe	3185.67983	2988.3661	2927.73897	3452.43918	3220.95379	3344.41266	4515.06733	5390.30255	5563.36543	5088.26924	5447.62274	5862.09181	6095.78182	5657.0619	5276.76448	4984.65197	4746.55271	4292.40043	4256.02747	4893.16012	4489.71417	4362.94836	4161.22538	3707.0731	3558.26107	3791.95108	3600.1489	3632.11593	2811.99628	2978.44529	3227.56766	3131.66657
Asia & Oceania	1078386.47108	1117323.67676	1177451.11816	1237598.37069	1374696.39314	1418006.2748	1478270.00499	1562170.88868	1671678.40242	1701320.93939	1726097.37025	1802478.10642	1847491.11399	1918466.76096	2043546.18304	2169413.00377	2249406.81539	2295176.72642	2357927.1564	2333454.12792	2433808.85811	2525839.20277	2633523.32959	2891614.49361	3187657.37793	3579861.0305	3863141.09354	4120945.48883	4351151.99507	4768246.1555	4960748.81785	5338369.18226
Afghanistan	131.17505	137.78892	159.83515	159.83515	163.14208	166.44902	176.36982	184.086	152.11897	139.99354	115.74269	103.61727	48.0718	52.459	57.39735	62.6664	68.25512	74.09737	78.26411	83.48906	89.07778	28.6601	23.14854	38.5809	37.47859	36.37627	38.5809	267.86166	382.50204	551.15568	551.15568	551.15568
American Samoa	0	0	0	0	0	0	0	0	0	0	0	0	0	0	0	0	0	0	0	0	0	0	0	0	0	0	0	0	0	0	0	0
Australia	73439.28971	77464.93079	78820.77376	83008.45462	89322.49409	91623.01789	87284.32038	99286.28646	92988.78167	103667.97412	103720.88506	108077.21956	111208.88613	109060.48129	109750.5282	112243.9565	120434.1299	126833.04734	137690.81423	140661.54334	140919.4842	140991.13444	143245.36117	142749.32106	144656.31971	154785.45879	156856.70184	156529.31536	155547.15594	156551.36159	154549.56416	131173.94947
Bangladesh	259.04317	271.16859	329.5911	176.36982	68.3433	108.02651	163.14208	256.83855	222.66689	275.57784	620.6013	198.41604	186.29062	69.44562	65.03637	707.68389	388.0136	712.09314	205.02991	101.41265	727.5255	771.61795	771.61795	771.61795	771.61795	817.91503	1042.78655	988.77329	1385.60538	1385.60538	1385.60538	2037.07139
Bhutan	1.15743	1.20152	1.21254	1.32277	0.99208	1.10231	1.433	20.75652	22.04623	19.8416	19.8416	19.8416	20.94392	12.12542	49.60401	57.32019	65.03637	78.26411	74.95717	72.75255	72.75255	60.18179	70.07063	45.98623	10.21732	40.67749	35.73693	32.9536	47.09956	23.66552	25.26939	25.26939
Brunei	2.20462	0	0	0	0	0	0	0	0	0	0	0	0	0	0	0	0	0	0	0	0	0	0	0	0	0	0	0	0	0	0	0
Burma (Myanmar)	83.77566	111.33345	139.99354	124.56118	139.99354	149.91434	125.66349	84.87797	74.95717	91.49184	91.49184	97.0034	95.90109	78.26411	71.65024	80.46873	65.03637	63.93406	66.13868	211.64378	639.34059	707.68389	541.23488	943.57852	514.7794	632.72672	807.99423	854.2913	737.4463	683.43304	756.18559	1559.77057
Cambodia	0	0	0	0	0	0	0	0	0	0	0	0	0	0	0	0	0	0	0	0	0	0	0	0	0	0	0	0	0	34.17165	37.47859	47.39939
China	678511.22269	679906.74887	725981.15907	768223.93499	844845.59759	856096.88964	907163.66799	971986.1898	1042611.27861	1058301.5785	1069013.84029	1117332.55642	1155387.65149	1205471.8802	1303034.01391	1401073.91361	1469160.57998	1469977.3927	1509366.28451	1437496.68618	1481866.92302	1523838.53035	1608370.37926	1834610.63662	2033364.31931	2384804.32926	2608471.02029	2788086.04246	2953216.69336	3350858.98164	3501779.73681	3826868.99371
Cook Islands	0	0	0	0	0	0	0	0	0	0	0	0	0	0	0	0	0	0	0	0	0	0	0	0	0	0	0	0	0	0	0	0
Fiji	23.14854	19.8416	25.35316	19.8416	24.25085	17.63698	16.53467	5.51156	8.81849	17.63698	26.45547	19.8416	22.04623	22.04623	22.04623	22.04623	24.25085	24.25085	22.04623	19.8416	18.73929	16.53467	17.96768	18.18814	0.22046	0	0	0	0	0	0	0
French Polynesia	0	0	0	0	0	0	0	0	0	0	0	0	0	0	0	0	0	0	0	0	0	0	0	0	0	0	0	0	0	0	0	0
Guam	0	0	0	0	0	0	0	0	0	0	0	0	0	0	0	0	0	0	0	0	0	0	0	0	0	0	0	0	0	0	0	0
Hawaiian Trade Zone	0	0	0	0	0	0	0	NA	NA	NA	NA	NA	NA	NA	NA	NA	NA	NA	NA	NA	NA	NA	NA	NA	NA	NA	NA	NA	NA	NA	NA	NA
Hong Kong	30.49875	140.05307	1832.10762	3936.71653	4885.06585	6278.79527	6889.87039	8863.91492	10780.44967	11612.57239	10378.33971	9274.80589	11547.79727	13329.5998	9604.18093	10328.55603	8237.92663	7068.75899	8601.8911	7046.58269	6678.34235	8854.81534	9606.75483	11754.57324	11785.31891	11932.57999	12562.55645	13515.92239	12505.85796	13593.45456	11381.35376	13810.72344
India	122928.6605	144012.56988	150294.64231	157906.10225	186706.19114	194065.22178	208829.58013	210933.89251	221891.96974	236378.54563	247863.52768	269813.85378	281854.40076	295959.57692	312526.21434	329291.26781	318616.4846	343008.43037	354649.94064	381412.95813	396193.85115	411844.46784	419531.98726	432047.63043	481400.31462	504908.20668	539485.5094	587255.27448	640524.47093	674878.00445	662585.02816	721418.69236
Indonesia	645.55762	792.07685	643.52937	704.20059	1222.45227	1757.04021	3957.91508	4260.20192	4876.48215	6571.47326	7198.97503	6489.63767	7511.25983	11577.57621	13801.79802	11590.32664	16149.90861	14865.89445	17712.36221	21573.33562	22437.54772	31299.02874	30874.63887	30125.06714	42717.87212	45436.17193	54554.49149	60170.76787	55205.95751	63807.29305	63773.12139	73720.3791
Japan	97571.08999	105749.97837	103736.93227	99055.81609	111415.01835	117477.73083	107358.51255	109900.44254	122407.26723	122564.89775	126610.38044	128773.11533	125305.24379	126749.27168	136316.23196	140762.95599	142223.51854	148322.60729	140576.66537	153131.99175	168798.0408	173205.08161	179202.75772	185306.25572	203364.32041	196281.96992	198108.49985	207580.66136	203803.04033	181496.66766	206124.50805	192853.78159
Kiribati	0	0	0	0	0	0	0	0	0	0	0	0	0	0	0	0	0	0	0	0	0	0	0	0	0	0	0	0	0	0	0	0
Korea, North	49335.04721	50900.32934	53600.99217	55903.7206	57387.43169	60075.96909	59447.65162	56835.1737	71308.52185	57279.40518	53674.84703	51901.22805	45656.6342	41938.53798	38684.51485	35510.96045	30645.35811	30078.77007	27136.70105	30541.74084	32708.88497	33756.08076	32151.11542	32896.2779	33645.84963	35505.44889	36421.46963	29712.8027	33164.13956	31899.78843	30805.19325	31321.07497
Korea, South	30765.51004	34183.77757	34665.48763	37759.67562	44235.75486	49522.44014	53850.11454	52386.24505	53593.27599	50623.64919	49773.76713	48240.17424	43086.04411	45609.23481	46850.4374	49246.8623	53866.64921	57054.53366	66021.83657	61885.96435	70980.03306	80024.49777	80566.83496	82267.70138	86017.76463	87911.53555	89636.65282	98225.86294	110522.14615	114149.85284	127413.96543	139480.96788
Laos	0.09921	0.11023	0.22046	0.33069	0.44092	1.10231	2.20462	1.10231	1.10231	1.10231	1.10231	1.10231	1.10231	1.10231	1.10231	25.92747	55.92356	105.21011	175.40309	238.51593	261.7866	192.48671	298.46149	306.22639	434.14764	437.57462	468.15825	504.25343	516.10912	550.54401	537.51028	537.51028
Macau	4.40925	1.10231	1.10231	1.10231	1.10231	0	0	0	0	0	2.31485	2.20462	2.20462	2.20462	2.20462	2.20462	2.20462	1.10231	1.10231	1.02074	1.17396	1.13648	1.05381	1.51127	1.72512	1.34592	1.32608	1.46938	0	0	0	0
Malaysia	88.18491	200.98223	151.01666	408.36227	449.12464	587.24976	468.47902	638.23828	676.99885	2085.35704	2502.24679	2546.19814	2758.71055	1963.32676	2622.39872	2668.6958	3274.96705	2583.81783	2613.58023	2163.8372	3677.3107	5108.11084	6426.47523	8432.6819	9662.91098	11622.75554	12342.44361	16049.10996	16626.75638	18698.90332	25530.6334	26479.72348
Maldives	0	0	0	0	0	0	0	0	0	0	0	0	0	0	0	0	0	0	0	0	0	0	0	0	0	0	0	0	0	0	0	0
Mongolia	5513.4426	4782.92899	5712.67058	5926.19526	6024.13158	6794.64722	7519.96809	7944.35797	8311.42765	7911.28863	7335.8821	7806.56905	6982.04015	6386.79202	5844.45483	5751.86067	5797.05544	5546.83076	5595.33246	5530.29609	5744.14449	5719.89364	6100.19106	5776.11152	5824.61322	6032.95007	6524.58094	6682.21146	6613.86816	7188.17238	7177.14926	10144.57144
Nauru	0	0	0	0	0	0	0	0	0	0	0	0	0	0	0	0	0	0	0	0	0	0	0	0	0	0	0	0	0	0	0	0
Nepal	94.96412	52.92197	54.91495	56.31378	120.562	96.45776	63.93406	95.90109	98.10571	89.28722	14.33005	76.05948	112.43576	66.13868	133.37967	136.68661	139.99354	148.81203	368.17199	461.86846	473.99388	542.33719	251.32699	320.77261	283.29402	455.25459	285.49864	361.55813	340.61421	354.94426	371.47893	371.47893
New Caledonia	132.27736	90.38953	71.65024	106.9242	113.53807	195.10911	192.90449	170.85826	187.39293	228.17845	180.77906	194.0068	187.39293	187.39293	181.88137	181.88137	185.18831	124.56118	132.27736	122.35656	279.98709	285.49864	304.23794	345.02346	309.74949	286.60095	311.95411	268.96397	404.54827	278.88477	278.88477	278.88477
New Zealand	2530.31494	2540.71084	2488.34003	2713.37358	2664.99975	2504.46243	2400.77572	2183.67439	2720.5827	2300.54144	2384.57725	2321.62976	1990.78644	2553.81181	2620.41015	2215.68772	1840.12583	2580.54837	2564.94626	2729.0253	2490.82133	2920.45931	2371.00449	3991.37243	4436.13522	4733.50355	4373.87337	3665.63501	4431.75574	3296.27803	2918.36932	3248.51158
Niue	0	0	0	0	0	0	0	0	0	0	0	0	0	0	0	0	0	0	0	0	0	0	0	0	0	0	0	0	0	0	0	0
Pakistan	2180.84935	2238.34403	2781.78152	2473.17681	2771.59657	3123.84457	3326.2598	3378.25803	3913.65397	3874.84489	4024.93671	4254.38612	4473.39224	4594.84491	4751.47453	4550.16382	4745.57827	4912.39766	4818.20295	4545.93205	4457.74714	4860.09078	5390.30255	6684.41608	8701.64587	8503.22983	8701.64587	11145.47016	9250.59693	8971.71216	8507.63907	6900.46911
Papua New Guinea	0	0	0	0	0	1.10231	1.10231	1.10231	1.10231	1.10231	1.10231	1.10231	1.10231	1.10231	1.10231	1.10231	1.10231	1.10231	1.10231	0	0	0	0	0	0	0	0	0	0	0	0	0
Philippines	707.68389	816.81272	946.88546	1382.29844	2257.72326	2738.75871	2176.51378	2323.23142	2934.01112	2392.02667	2730.42524	3031.53592	2996.08228	3154.81511	3387.40281	3820.61117	5127.95244	5908.38889	5282.27603	6923.61765	9551.52793	9958.28082	9283.66627	9809.46879	10514.94806	11028.62515	11229.24582	11542.30225	13161.59763	11275.5429	15086.23327	16483.96407
Samoa	0	0	0	0	0	0	0	0	0	0	0	0	0	0	0	0	0	0	0	0	0	0	0	0	0	0	0	0	0	0	0	0
Singapore	5.51156	9.9208	3.30693	6.61387	9.9208	20.94392	12.12542	19.8416	23.14854	22.04623	37.47859	0.06063	35.49443	12.78681	10.91288	4.73994	1.02405	0.82343	1.18058	0.07385	0.13558	0.60672	11.58199	14.62767	13.74472	4.40925	7.71618	13.22774	7.71618	6.61387	13.22774	12.12542
Solomon Islands	0	0	0	0	0	0	0	0	0	0	0	0	0	0	0	0	0	0	0	0	0	0	0	0	0	0	0	0	0	0	0	0
Sri Lanka	2.20462	2.20462	36.37627	45.19477	62.83175	38.5809	160.93746	145.94602	5.07063	7.82641	2.29281	3.85809	2.97624	3.37307	4.40925	6.61387	3.30693	3.30693	3.30693	2.20462	2.20462	1.10231	29.76241	105.82189	28.6601	103.61727	78.26411	76.05948	80.46873	111.33345	120.15194	156.52821
Taiwan	6589.17638	6058.96462	6978.15781	9599.872	11389.75117	12104.35648	14872.52375	16211.19051	18577.99299	19680.50828	18935.60154	20659.09291	24175.97431	26702.30109	28151.98713	29029.96049	32948.55722	37424.25771	40567.72342	43695.52529	51956.89478	53551.99112	59514.86836	63150.95261	64671.48641	66012.54739	69084.29011	72281.2995	69396.02817	66198.84352	70002.7161	73330.62716
Thailand	1620.29002	1855.14001	2483.73306	2353.43475	2864.90722	5983.34606	6297.04624	7902.97389	8464.36123	10174.39117	14227.94388	16618.10018	17820.11866	18516.86542	20636.46025	23095.52619	27819.82214	28705.08729	24590.42795	24478.56319	24173.73992	27408.95542	27707.65865	27636.05361	30968.07519	32640.86795	33155.99128	35303.91992	38287.11507	36738.9353	39340.39011	41625.48156
Timor-Leste (East Timor)	NA	NA	NA	NA	NA	NA	NA	NA	NA	NA	NA	NA	NA	NA	NA	NA	NA	NA	NA	NA	NA	NA	NA	0	0	0	0	0	0	0	0	0
Tonga	0	0	0	0	0	0	0	0	0	0	0	0	0	0	0	0	0	0	0	0	0	0	0	0	0	0	0	0	0	0	0	0
U.S. Pacific Islands	0	0	0	0	0	0	0	0	0	0	0	0	0	0	0	0	0	0	0	0	0	0	0	0	0	0	0	0	0	0	0	0
Vanuatu	0	0	0	0	0	0	0	0	0	0	0	0	0	0	0	0	0	0	0	0	0	0	0	0	0	0	0	0	0	0	0	0
Vietnam	5189.68188	4981.34503	5509.35217	5544.62614	5549.03538	6476.07924	5510.45449	6149.79507	4824.81682	5007.80051	4607.66148	4620.88922	4020.12953	4389.40383	4362.94836	6942.35694	7518.86578	8968.40522	9009.19074	8321.34845	8606.8471	9889.93752	10858.8692	11464.03814	13519.84882	14904.35189	18554.1048	19829.47905	24992.70545	24662.01205	29696.26803	23930.0773
Wake Island	0	0	0	0	0	0	0	0	0	0	0	0	0	0	0	0	0	0	0	0	0	0	0	0	0	0	0	0	0	0	0	0
World	4124506.00531	4217250.73429	4304793.12856	4425762.59167	4679743.93072	4834070.1759	4922535.95485	5070256.85053	5219861.22637	5222073.54076	5208362.94845	4960854.17066	4864873.81966	4851878.03058	4899159.60818	4991184.19434	5108138.93989	5124387.6349	5143399.49574	5066957.87793	5281837.64216	5328022.46876	5438453.13154	5786471.27084	6094761.49795	6492269.2794	6801780.77865	7103233.07355	7316676.32556	7487076.94118	7770279.61349	8144307.50045
