# Supplementary material
Source: MDPI journal article supplement (https://www.mdpi.com/1099-4300/15/12/5565)
Supplement: s2 [file s2 › Sources/data/Natural Gas Production.csv]

Region	1980	1981	1982	1983	1984	1985	1986	1987	1988	1989	1990	1991	1992	1993	1994	1995	1996	1997	1998	1999	2000	2001	2002	2003	2004	2005	2006	2007	2008	2009	2010
Bermuda	0	0	0	0	0	0	0	0	0	0	0	0	0	0	0	0	0	0	0	0	0	0	0	0	0	0	0	0	0	0	0
Canada	2.8056	2.70157	2.7853	2.61255	2.83969	3.09618	2.90156	3.14955	3.63476	3.77911	3.90287	4.11836	4.59712	4.99342	5.45028	5.72063	5.83082	5.89488	6.11943	6.40933	6.5991	6.74197	6.77734	6.6148	6.64499	6.738	6.72472	6.59539	6.20899	5.8083	5.57303
Greenland	0	0	0	0	0	0	0	0	0	0	0	0	0	0	0	0	0	0	0	0	0	0	0	0	0	0	0	0	0	0	0
Mexico	0.95018	1.02048	1.09983	1.08047	1.06426	1.04968	0.93083	0.94397	0.95381	0.90881	1.00323	1.00328	0.97529	1.05455	1.08308	1.06303	1.20769	1.24066	1.34714	1.36288	1.38281	1.39313	1.42825	1.49671	1.27714	1.38495	1.80845	1.72209	1.71104	1.72006	1.87601
Saint Pierre and Miquelon	0	0	0	0	0	0	0	0	0	0	0	0	0	0	0	0	0	0	0	0	0	0	0	0	0	0	0	0	0	0	0
United States	19.90748	19.69888	18.31896	16.59291	18.00743	16.98053	16.54076	17.13624	17.59899	17.84764	18.32649	18.22874	18.3752	18.58357	19.34799	19.08257	19.3442	19.39345	19.61374	19.3407	19.66155	20.16525	19.38227	19.63377	19.07437	18.55643	19.02211	19.78618	20.70329	21.1396	21.80627
Antarctica	0	0	0	0	0	0	0	0	0	0	0	0	0	0	0	0	0	0	0	0	0	0	0	0	0	0	0	0	0	0	0
Antigua and Barbuda	0	0	0	0	0	0	0	0	0	0	0	0	0	0	0	0	0	0	0	0	0	0	0	0	0	0	0	0	0	0	0
Argentina	0.28728	0.355	0.40937	0.45657	0.50684	0.513	0.56122	0.5407	0.64889	0.73843	0.6464	0.7355	0.74141	0.79418	0.82185	0.92298	0.98054	1.01044	1.09199	1.27578	1.38059	1.37062	1.33261	1.51455	1.65626	1.68394	1.70128	1.65441	1.626	1.52643	1.47986
Aruba	NA	NA	NA	NA	NA	NA	0	0	0	0	0	0	0	0	0	0	0	0	0	0	0	0	0	0	0	0	0	0	0	0	0
Bahamas, The	0	0	0	0	0	0	0	0	0	0	0	0	0	0	0	0	0	0	0	0	0	0	0	0	0	0	0	0	0	0	0
Barbados	0.00037	0.00037	0.00037	0.00042	0.00042	0.00042	0.00042	0.00031	0.00097	0.00105	0.00105	0.00083	0.0008	0.00112	0.00082	0.00097	0.00108	0.00108	0.00108	0.00108	0.00108	0.00108	0.00108	0.00108	0.00108	0.00108	0.00108	0.00104	0.00118	0.00074	0.00074
Belize	0	0	0	0	0	0	0	0	0	0	0	0	0	0	0	0	0	0	0	0	0	0	0	0	0	0	0	0	0	0	0
Bolivia	0.07371	0.07277	0.081	0.0843	0.092	0.089	0.092	0.0914	0.09818	0.10736	0.107	0.104	0.11	0.10311	0.10489	0.11744	0.11403	0.11699	0.11182	0.09115	0.12252	0.17271	0.21404	0.26645	0.37089	0.45577	0.48677	0.51998	0.54105	0.46573	0.53031
Brazil	0.05662	0.05662	0.05092	0.0631	0.08192	0.10184	0.09963	0.11601	0.1079	0.13565	0.11398	0.13966	0.15299	0.15184	0.15829	0.16564	0.18547	0.20274	0.21302	0.22661	0.26774	0.24314	0.2986	0.32394	0.35479	0.36504	0.36915	0.36765	0.47152	0.38409	0.4704
Cayman Islands	0	0	0	0	0	0	0	0	0	0	0	0	0	0	0	0	0	0	0	0	0	0	0	0	0	0	0	0	0	0	0
Chile	0.085	0.085	0.049	0.046	0.048	0.044	0.026	0.0258	0.03532	0.05686	0.066	0.052	0.05544	0.0618	0.06851	0.0671	0.06712	0.07898	0.07379	0.0445	0.04227	0.0445	0.04075	0.06853	0.04038	0.07557	0.07261	0.06587	0.0642	0.07203	0.0693
Colombia	0.1188	0.1272	0.1272	0.1224	0.1716	0.1728	0.1728	0.13006	0.13582	0.13549	0.14028	0.144	0.14009	0.14585	0.15092	0.14927	0.15551	0.19586	0.20538	0.16994	0.187	0.1998	0.2021	0.1998	0.20275	0.21883	0.23687	0.25065	0.29527	0.34415	0.36941
Costa Rica	0	0	0	0	0	0	0	0	0	0	0	0	0	0	0	0	0	0	0	0	0	0	0	0	0	0	0	0	0	0	0
Cuba	0.00062	0.00032	0.00032	0.00028	0.00013	0.00025	0.00021	0.00082	0.00074	0.00115	0.00119	0.00124	0.00128	0.00131	0.00128	0.00152	0.00159	0.02773	0.01479	0.01849	0.02218	0.01109	0.01294	0.01368	0.01368	0.01479	0.01479	0.02218	0.04289	0.04289	0.03956
Dominica	0	0	0	0	0	0	0	0	0	0	0	0	0	0	0	0	0	0	0	0	0	0	0	0	0	0	0	0	0	0	0
Dominican Republic	0	0	0	0	0	0	0	0	0	0	0	0	0	0	0	0	0	0	0	0	0	0	0	0	0	0	0	0	0	0	0
Ecuador	0.0039	0.00252	0.0026	0.0039	0.0052	0.0052	0.0039	0.00247	0.00368	0.00367	0.0052	0.00419	0.00459	0.00459	0.00459	0.00551	0.00551	0.00459	0.00459	0.00459	0.00643	0.00735	0.00459	0.00689	0.0078	0.01194	0.01285	0.01263	0.01194	0.01359	0.01515
El Salvador	0	0	0	0	0	0	0	0	0	0	0	0	0	0	0	0	0	0	0	0	0	0	0	0	0	0	0	0	0	0	0
Falkland Islands (Islas Malvinas)	0	0	0	0	0	0	0	0	0	0	0	0	0	0	0	0	0	0	0	0	0	0	0	0	0	0	0	0	0	0	0
French Guiana	0	0	0	0	0	0	0	0	0	0	0	0	0	0	0	0	0	0	0	0	0	0	0	0	0	0	0	0	0	0	0
Grenada	0	0	0	0	0	0	0	0	0	0	0	0	0	0	0	0	0	0	0	0	0	0	0	0	0	0	0	0	0	0	0
Guadeloupe	0	0	0	0	0	0	0	0	0	0	0	0	0	0	0	0	0	0	0	0	0	0	0	0	0	0	0	0	0	0	0
Guatemala	0	0	0	0	0	0	0	0	0	0	0	0	0	0	0	0	0	0	0	0	0	0	0	0	0	0	0	0	0	0	0
Guyana	0	0	0	0	0	0	0	0	0	0	0	0	0	0	0	0	0	0	0	0	0	0	0	0	0	0	0	0	0	0	0
Haiti	0	0	0	0	0	0	0	0	0	0	0	0	0	0	0	0	0	0	0	0	0	0	0	0	0	0	0	0	0	0	0
Honduras	0	0	0	0	0	0	0	0	0	0	0	0	0	0	0	0	0	0	0	0	0	0	0	0	0	0	0	0	0	0	0
Jamaica	0	0	0	0	0	0	0	0	0	0	0	0	0	0	0	0	0	0	0	0	0	0	0	0	0	0	0	0	0	0	0
Martinique	0	0	0	0	0	0	0	0	0	0	0	0	0	0	0	0	0	0	0	0	0	0	0	0	0	0	0	0	0	0	0
Montserrat	0	0	0	0	0	0	0	0	0	0	0	0	0	0	0	0	0	0	0	0	0	0	0	0	0	0	0	0	0	0	0
Netherlands Antilles	0	0	0	0	0	0	0	0	0	0	0	0	0	0	0	0	0	0	0	0	0	0	0	0	0	0	0	0	0	0	0
Nicaragua	0	0	0	0	0	0	0	0	0	0	0	0	0	0	0	0	0	0	0	0	0	0	0	0	0	0	0	0	0	0	0
Panama	0	0	0	0	0	0	0	0	0	0	0	0	0	0	0	0	0	0	0	0	0	0	0	0	0	0	0	0	0	0	0
Paraguay	0	0	0	0	0	0	0	0	0	0	0	0	0	0	0	0	0	0	0	0	0	0	0	0	0	0	0	0	0	0	0
Peru	0.04296	0.05228	0.04908	0.04908	0.04908	0.05015	0.05228	0.04394	0.04101	0.03774	0.01765	0.01706	0.0166	0.03149	0.03215	0.03051	0.03182	0.00787	0.01345	0.01345	0.01115	0.01214	0.01444	0.01706	0.0366	0.06729	0.07581	0.11372	0.15545	0.14779	0.30792
Puerto Rico	0	0	0	0	0	0	0	0	0	0	0	0	0	0	0	0	0	0	0	0	0	0	0	0	0	0	0	0	0	0	0
Saint Kitts and Nevis	0	0	0	0	0	0	0	0	0	0	0	0	0	0	0	0	0	0	0	0	0	0	0	0	0	0	0	0	0	0	0
Saint Lucia	0	0	0	0	0	0	0	0	0	0	0	0	0	0	0	0	0	0	0	0	0	0	0	0	0	0	0	0	0	0	0
Saint Vincent/Grenadines	0	0	0	0	0	0	0	0	0	0	0	0	0	0	0	0	0	0	0	0	0	0	0	0	0	0	0	0	0	0	0
Suriname	0	0	0	0	0	0	0	0	0	0	0	0	0	0	0	0	0	0	0	0	0	0	0	0	0	0	0	0	0	0	0
Trinidad and Tobago	0.08465	0.08465	0.10659	0.13272	0.20064	0.22572	0.15884	0.14975	0.1609	0.16976	0.18497	0.21005	0.20297	0.22781	0.26092	0.2801	0.31627	0.34321	0.34321	0.43289	0.51555	0.56057	0.63844	0.91301	1.03664	1.11746	1.34479	1.43963	1.45033	1.502	1.56695
Turks and Caicos Islands	0	0	0	0	0	0	0	0	0	0	0	0	0	0	0	0	0	0	0	0	0	0	0	0	0	0	0	0	0	0	0
Uruguay	0	0	0	0	0	0	0	0	0	0	0	0	0	0	0	0	0	0	0	0	0	0	0	0	0	0	0	0	0	0	0
Venezuela	0.61575	0.68125	0.7146	0.68602	0.72651	0.73604	0.80273	0.78249	0.78147	0.91531	0.90622	0.94503	0.90926	0.97067	1.04351	1.06025	1.14404	1.18357	1.32237	1.12637	1.14404	1.33373	1.19493	1.02627	1.14404	0.98606	1.09356	0.87187	0.87275	0.77513	1.04856
Virgin Islands, U.S.	0	0	0	0	0	0	0	0	0	0	0	0	0	0	0	0	0	0	0	0	0	0	0	0	0	0	0	0	0	0	0
Virgin Islands, British	0	0	0	0	0	0	0	0	0	0	0	0	0	0	0	0	0	0	0	0	0	0	0	0	0	0	0	0	0	0	0
Albania	0.01047	0.01109	0.01047	0.0111	0.01131	0.01047	0.01466	0.01665	0.02589	0.02589	0.00943	0.00522	0.00376	0.00111	0.00111	0.00111	0.00111	0.00074	0.00111	0.00074	0.00111	0.00111	0.00111	0.00111	0.00111	0.00111	0.00111	0.00037	0.00111	0.00111	0.00037
Austria	0.07439	0.05506	0.05077	0.04626	0.04851	0.04451	0.04249	0.04424	0.04771	0.05018	0.04833	0.04982	0.05406	0.05634	0.05086	0.05564	0.05601	0.05361	0.05886	0.0652	0.06406	0.06147	0.06672	0.07421	0.07029	0.05862	0.06533	0.07003	0.05804	0.06318	0.06552
Belgium	0.00145	0.00121	0.00115	0.00068	0.0014	0.00151	0.00099	0.00105	0.00063	0.0005	0.00042	0.00036	0.00021	0.00017	0.00005	0	0.00008	0	0	0	0.00006	0	0	0	0	0	0	0	0	0	0
Bosnia and Herzegovina	NA	NA	NA	NA	NA	NA	NA	NA	NA	NA	NA	NA	0.00081	0	0	0.03153	0	0	0	0	0	0	0	0	0	0	0	0	0	0	0
Bulgaria	0.00425	0.004	0.00283	0.0033	0.00283	0.00378	0.00471	0.00415	0.00033	0.00033	0.00047	0.00032	0.00028	0.00245	0.0021	0.00175	0.0014	0.0014	0.00105	0.0007	0.00208	0.00014	0.00007	0.00007	0.00003	0	0	0.01013	0.00371	0.00034	0.00169
Croatia	NA	NA	NA	NA	NA	NA	NA	NA	NA	NA	NA	NA	0.06729	0.07646	0.06656	0.07284	0.06656	0.05916	0.05805	0.05731	0.06138	0.06508	0.05583	0.06664	0.05884	0.0552	0.05663	0.07302	0.07294	0.07097	0.06789
Cyprus	0	0	0	0	0	0	0	0	0	0	0	0	0	0	0	0	0	0	0	0	0	0	0	0	0	0	0	0	0	0	0
Czech Republic	NA	NA	NA	NA	NA	NA	NA	NA	NA	NA	NA	NA	NA	0.0083	0.00981	0.00873	0.00803	0.0072	0.00746	0.00772	0.00746	0.00537	0.00506	0.00578	0.00716	0.00679	0.00649	0.00723	0.00707	0.00642	0.00737
Denmark	0	0	0	0.00163	0.01164	0.04713	0.07931	0.10192	0.10224	0.11963	0.12232	0.15318	0.15983	0.17718	0.19147	0.20751	0.25189	0.30547	0.30195	0.31007	0.32828	0.33441	0.33508	0.31757	0.37431	0.41358	0.41117	0.36447	0.39747	0.33147	0.32367
Faroe Islands	0	0	0	0	0	0	0	0	0	0	0	0	0	0	0	0	0	0	0	0	0	0	0	0	0	0	0	0	0	0	0
Finland	0	0	0	0	0	0	0	0	0	0	0	0	0	0	0	0	0	0	0	0	0	0	0	0	0	0	0	0	0	0	0
Former Czechoslovakia	0.01835	0.02341	0.02383	0.02196	0.02694	0.02453	0.02453	0.02354	0.0309	0.02984	0.02515	0.01948	0.00963	NA	NA	NA	NA	NA	NA	NA	NA	NA	NA	NA	NA	NA	NA	NA	NA	NA	NA
Former Serbia and Montenegro	NA	NA	NA	NA	NA	NA	NA	NA	NA	NA	NA	NA	0.03128	0.03557	0.02911	0.0335	0.02481	0.02544	0.03483	0.02511	0.02008	0.02226	0.02218	0.0122	0.00887	0.00924	NA	NA	NA	NA	NA
Former Yugoslavia	0.07211	0.07035	0.06457	0.05963	0.07488	0.087	0.09125	0.0817	0.11316	0.10753	0.09973	0.09761	NA	NA	NA	NA	NA	NA	NA	NA	NA	NA	NA	NA	NA	NA	NA	NA	NA	NA	NA
France	0.27882	0.26245	0.24374	0.24615	0.23381	0.19848	0.15604	0.1447	0.11889	0.11495	0.111	0.12551	0.12274	0.12717	0.13126	0.12315	0.10609	0.09379	0.081	0.07358	0.06632	0.06819	0.06651	0.05743	0.04964	0.04008	0.04422	0.03936	0.03418	0.03251	0.02749
Germany	NA	NA	NA	NA	NA	NA	NA	NA	NA	NA	NA	0.59652	0.60528	0.6065	0.62917	0.66592	0.71985	0.70913	0.69115	0.73692	0.6969	0.70269	0.70515	0.70221	0.64981	0.6274	0.61978	0.57709	0.49899	0.49004	0.42742
Germany, East	0.09594	0.10803	0.09438	0.11817	0.1287	0.12948	0.11817	0.11349	0.11973	0.1092	0.05304	NA	NA	NA	NA	NA	NA	NA	NA	NA	NA	NA	NA	NA	NA	NA	NA	NA	NA	NA	NA
Germany, West	0.60295	0.61094	0.52392	0.55855	0.5843	0.53014	0.48574	0.56122	0.52303	0.51504	0.51415	NA	NA	NA	NA	NA	NA	NA	NA	NA	NA	NA	NA	NA	NA	NA	NA	NA	NA	NA	NA
Gibraltar	0	0	0	0	0	0	0	0	0	0	0	0	0	0	0	0	0	0	0	0	0	0	0	0	0	0	0	0	0	0	0
Greece	0	0	0.0032	0.00305	0.00335	0.00315	0.00432	0.00493	0.00591	0.00596	0.00561	0.00588	0.00578	0.00411	0.00209	0.00189	0.00204	0.00199	0.00178	0.00011	0.00187	0.00177	0.00187	0.00137	0.00127	0.00081	0.00115	0.00097	0.00065	0.00052	0.00031
Hungary	0.22417	0.21759	0.23685	0.22817	0.2389	0.25688	0.24504	0.2414	0.21579	0.20797	0.1677	0.16984	0.16929	0.17129	0.16549	0.16703	0.15875	0.14812	0.13076	0.11566	0.10919	0.1092	0.10387	0.10078	0.1043	0.10276	0.10504	0.08838	0.08848	0.10083	0.09852
Iceland	0	0	0	0	0	0	0	0	0	0	0	0	0	0	0	0	0	0	0	0	0	0	0	0	0	0	0	0	0	0	0
Ireland	0.03253	0.04958	0.07294	0.07802	0.08274	0.08768	0.0598	0.05955	0.07173	0.08125	0.08274	0.08484	0.08375	0.09507	0.09671	0.09919	0.09561	0.08401	0.06201	0.04863	0.04352	0.0299	0.02956	0.02469	0.03038	0.02038	0.0181	0.01628	0.01561	0.01404	0.0139
Italy	0.45271	0.50733	0.52088	0.467	0.49399	0.5086	0.56993	0.58398	0.59389	0.60677	0.61894	0.62198	0.6493	0.69142	0.72953	0.72058	0.72165	0.69606	0.68674	0.63136	0.6009	0.55065	0.52829	0.50163	0.46825	0.43609	0.39664	0.35065	0.33436	0.28949	0.30369
Luxembourg	0	0	0	0	0	0	0	0	0	0	0	0	0	0	0	0	0	0	0	0	0	0	0	0	0	0	0	0	0	0	0
Macedonia	NA	NA	NA	NA	NA	NA	NA	NA	NA	NA	NA	NA	0	0	0	0	0	0	0	0	0	0	0	0	0	0	0	0	0	0	0
Malta	0	0	0	0	0	0	0	0	0	0	0	0	0	0	0	0	0	0	0	0	0	0	0	0	0	0	0	0	0	0	0
Montenegro	NA	NA	NA	NA	NA	NA	NA	NA	NA	NA	NA	NA	NA	NA	NA	NA	NA	NA	NA	NA	NA	NA	NA	NA	NA	NA	0	0	0	0	0
Netherlands	3.03763	2.81982	2.40052	2.55337	2.57435	2.69	2.46723	2.47424	2.18643	2.38984	2.40754	2.72134	2.73328	2.78215	2.63926	2.66484	3.01253	2.6708	2.53949	2.36793	2.2879	2.4558	2.39237	2.30144	2.71352	2.47869	2.44306	2.40481	2.6468	2.49303	2.80202
Norway	1.00437	1.0163	0.97477	0.98702	1.04022	1.03151	1.07082	1.13077	1.141	1.17805	1.06482	1.05427	1.13555	1.06265	1.15794	1.20625	1.60549	1.79434	1.77187	1.90419	2.02246	2.09763	2.57882	2.8926	3.17548	3.29976	3.31015	3.37366	3.73446	3.90209	3.99987
Poland	0.20029	0.17814	0.16408	0.16043	0.17627	0.18217	0.16541	0.16625	0.16486	0.15267	0.10513	0.11673	0.11283	0.14431	0.13657	0.13973	0.1385	0.14123	0.14315	0.13684	0.14611	0.15393	0.15744	0.15914	0.17408	0.17219	0.17001	0.1715	0.16265	0.16209	0.16273
Portugal	0	0	0	0	0	0	0	0	0	0	0	0	0	0	0	0	0	0	0	0	0	0	0	0	0	0	0	0	0	0	0
Romania	1.284	1.3268	1.4445	1.498	1.43166	1.35997	1.4338	1.40919	1.3696	1.20919	1.07107	0.88388	0.78392	0.74511	0.69113	0.68061	0.63109	0.61018	0.51251	0.49897	0.47788	0.50248	0.46828	0.43351	0.41505	0.41112	0.44696	0.43009	0.40128	0.3816	0.37212
Serbia	NA	NA	NA	NA	NA	NA	NA	NA	NA	NA	NA	NA	NA	NA	NA	NA	NA	NA	NA	NA	NA	NA	NA	NA	NA	NA	0.00702	0.00351	0.00351	0.00667	0.01229
Slovakia	NA	NA	NA	NA	NA	NA	NA	NA	NA	NA	NA	NA	NA	0.00868	0.01001	0.01165	0.01065	0.0098	0.00881	0.00722	0.00586	0.00664	0.0064	0.00734	0.00626	0.00557	0.00776	0.00479	0.00385	0.00386	0.00389
Slovenia	NA	NA	NA	NA	NA	NA	NA	NA	NA	NA	NA	NA	0.00055	0.00068	0.00034	0.00034	0.00037	0.00049	0.00033	0	0	0	0	0.00019	0.00019	0.00019	0.00015	0.00011	0.00011	0.00011	0.00026
Spain	0	0	0	0.00278	0.00881	0.0101	0.01494	0.02858	0.03543	0.0627	0.05586	0.05244	0.04803	0.02627	0.00796	0.01673	0.01878	0.00718	0.00451	0.00577	0.00618	0.01968	0.01951	0.0082	0.01293	0.00603	0.00263	0.00069	0.00062	0.00054	0.00226
Sweden	0	0	0	0	0	0	0	0	0	0	0	0	0	0	0	0	0	0	0	0	0	0	0	0	0	0	0	0	0	0	0
Switzerland	0	0	0	0	0	0.00104	0.00101	0.00032	0.00027	0.00016	0.00013	0.00011	0.0001	0.00009	0.00004	0	0	0	0	0	0	0	0	0	0	0	0	0	0	0	0
Turkey	0	0	0.00103	0.00258	0.00145	0.00206	0.01646	0.01029	0.00308	0.00617	0.0077	0.00737	0.00719	0.00726	0.00722	0.00661	0.00748	0.00919	0.02051	0.02654	0.0232	0.01133	0.01372	0.02033	0.02498	0.03256	0.03285	0.03242	0.03696	0.02486	0.02476
United Kingdom	1.38121	1.37779	1.41801	1.45623	1.41599	1.57223	1.64867	1.73441	1.67036	1.63403	1.80487	2.00901	2.04305	2.40103	2.57209	2.80686	3.34494	3.19211	3.33551	3.69161	4.05139	3.94392	3.90704	3.87187	3.65164	3.32998	3.0218	2.71924	2.62404	2.24156	2.13735
Armenia	NA	NA	NA	NA	NA	NA	NA	NA	NA	NA	NA	NA	0	0	0	0	0	0	0	0	0	0	0	0	0	0	0	0	0	0	0
Azerbaijan	NA	NA	NA	NA	NA	NA	NA	NA	NA	NA	NA	NA	0.2884	0.25143	0.2359	0.24289	0.24773	0.22037	0.20669	0.22185	0.20928	0.2115	0.18715	0.18751	0.18401	0.21375	0.25048	0.39567	0.61515	0.59965	0.61247
Belarus	NA	NA	NA	NA	NA	NA	NA	NA	NA	NA	NA	NA	0.01062	0.01062	0.01062	0.01098	0.01098	0.00732	0.00806	0.00769	0.00736	0.00732	0.00696	0.00586	0.0066	0.0063	0.00623	0.00586	0.00557	0.00549	0.00806
Estonia	NA	NA	NA	NA	NA	NA	NA	NA	NA	NA	NA	NA	0	0	0	0	0	0	0	0	0	0	0	0	0	0	0	0	0	0	0
Former U.S.S.R.	15.9848	16.41356	17.66231	18.90797	21.4078	23.43361	24.82406	26.0173	27.89899	28.84162	29.53033	28.96648	NA	NA	NA	NA	NA	NA	NA	NA	NA	NA	NA	NA	NA	NA	NA	NA	NA	NA	NA
Georgia	NA	NA	NA	NA	NA	NA	NA	NA	NA	NA	NA	NA	0.00074	0	0	0	0	0.00222	0.00222	0.00222	0.00222	0.00222	0.00047	0.00073	0.00071	0.00051	0.00034	0.00034	0.00034	0.00034	0.00034
Kazakhstan	NA	NA	NA	NA	NA	NA	NA	NA	NA	NA	NA	NA	0.29949	0.24773	0.16639	0.17712	0.15678	0.22555	0.20336	0.17008	0.32908	0.37271	0.48437	0.26607	0.33163	0.35827	0.36385	0.36859	0.42438	0.4141	0.32703
Kyrgyzstan	NA	NA	NA	NA	NA	NA	NA	NA	NA	NA	NA	NA	0.00365	0.00146	0.00128	0.00129	0.00089	0.00067	0.00052	0.00037	0.00048	0.00059	0.00037	0.001	0.00107	0.00111	0.00096	0.00068	0.00111	0.00057	0.00046
Latvia	NA	NA	NA	NA	NA	NA	NA	NA	NA	NA	NA	NA	0	0	0	0	0	0	0	0	0	0	0	0	0	0	0	0	0	0	0
Lithuania	NA	NA	NA	NA	NA	NA	NA	NA	NA	NA	NA	NA	0	0	0	0	0	0	0	0	0	0	0	0	0	0	0	0	0	0	0
Moldova	NA	NA	NA	NA	NA	NA	NA	NA	NA	NA	NA	NA	0	0	0	0	0	0	0	0	0	0	0	0	0	0	0	0	0	0	0
Russia	NA	NA	NA	NA	NA	NA	NA	NA	NA	NA	NA	NA	22.79666	21.98859	21.62193	21.1734	20.04347	19.07069	19.7299	19.7691	19.50898	19.39495	19.86174	20.69199	21.53701	21.77615	22.30153	22.1566	22.07439	19.80488	22.09594
Tajikistan	NA	NA	NA	NA	NA	NA	NA	NA	NA	NA	NA	NA	0.0037	0	0.00122	0.00144	0.00104	0.00148	0.00222	0.00222	0.00148	0.00185	0.00074	0.00148	0.00144	0.00148	0.0013	0.00072	0.00108	0.00137	0.00148
Turkmenistan	NA	NA	NA	NA	NA	NA	NA	NA	NA	NA	NA	NA	2.11495	2.39597	1.3163	1.19428	1.36807	0.94286	0.48807	0.82454	1.71933	1.78219	1.97815	2.18521	2.16561	2.25154	2.25869	2.46169	2.51958	1.36343	1.61897
Ukraine	NA	NA	NA	NA	NA	NA	NA	NA	NA	NA	NA	NA	0.76244	0.70043	0.66394	0.64902	0.67294	0.66924	0.66924	0.66185	0.66555	0.67294	0.68034	0.72101	0.70992	0.69676	0.70035	0.70035	0.71112	0.72765	0.69532
Uzbekistan	NA	NA	NA	NA	NA	NA	NA	NA	NA	NA	NA	NA	1.53415	1.61302	1.69187	1.72394	1.72394	1.76704	1.96816	1.99689	2.02563	2.26626	2.07232	2.06445	2.14989	2.14379	2.25333	2.34129	2.42788	2.20549	2.15891
Bahrain	0.1047	0.12564	0.13611	0.14658	0.13925	0.17171	0.18846	0.22668	0.19042	0.19485	0.21464	0.24395	0.19671	0.24477	0.23996	0.23996	0.24292	0.29469	0.30652	0.31096	0.31687	0.32908	0.34978	0.3557	0.3605	0.38579	0.40812	0.42433	0.44702	0.44955	0.45999
Iran	0.264	0.22176	0.264	0.32736	0.50266	0.6336	0.56602	0.59664	0.74727	0.82946	0.88387	0.96941	0.93232	1.00951	1.18591	1.31642	1.49954	1.75275	1.86463	2.15551	2.24651	2.46131	2.79695	3.0207	3.12885	3.85979	4.05035	4.17305	4.33713	5.26561	5.45032
Iraq	0.06491	0.02403	0.02513	0.01885	0.02094	0.02408	0.04712	0.13862	0.21186	0.22554	0.15495	0.04083	0.10575	0.09429	0.1172	0.11721	0.1198	0.11277	0.10908	0.11758	0.11647	0.10205	0.08726	0.04067	0.06471	0.05223	0.06484	0.05259	0.06772	0.04135	0.04683
Israel	0.0052	0.00519	0.00312	0.00208	0.00208	0.00208	0.00145	0.00218	0.00147	0.00147	0.0011	0.0011	0.00079	0.0011	0.0011	0.00074	0.00073	0.00073	0.00073	0.00035	0.00037	0.00037	0.00035	0.00071	0.02752	0.0265	0.03474	0.04082	0.05157	0.04226	0.0555
Jordan	0	0	0	0	0	0	0	0	0	0.00296	0.00481	0.00481	0.00555	0.00739	0.01035	0.01072	0.00998	0.01072	0.01035	0.01035	0.01072	0.01072	0.01146	0.01146	0.01146	0.01009	0.01153	0.00901	0.00756	0.00792	0.00792
Kuwait	0.25547	0.1047	0.1047	0.12983	0.15077	0.14658	0.18113	0.196	0.24081	0.30171	0.19369	0.01885	0.09687	0.2004	0.22074	0.22074	0.34387	0.34276	0.33277	0.31946	0.35496	0.31429	0.2958	0.33647	0.35866	0.44306	0.44702	0.43442	0.45747	0.37891	0.42264
Lebanon	0	0	0	0	0	0	0	0	0	0	0	0	0	0	0	0	0	0	0	0	0	0	0	0	0	0	0	0	0	0	0
Oman	0.02932	0.03455	0.04293	0.0534	0.04921	0.05759	0.07329	0.08355	0.07653	0.10317	0.10365	0.12983	0.12239	0.14642	0.15714	0.15419	0.15234	0.1845	0.25919	0.20669	0.33684	0.51654	0.55462	0.5842	0.63597	0.71286	0.85407	0.86595	0.86653	0.89207	0.97618
Palestinian Territories	NA	NA	NA	NA	NA	NA	NA	NA	NA	NA	NA	NA	NA	NA	NA	NA	NA	0	0	0	0	0	0	0	0	0	0	0	0	0	0
Qatar	0.19265	0.16454	0.19474	0.18228	0.21882	0.19998	0.20207	0.20741	0.21668	0.22518	0.28897	0.34342	0.41966	0.49916	0.49915	0.49916	0.50655	0.64336	0.72397	0.81529	1.07597	0.99832	1.09076	1.16101	1.4483	1.79696	1.98921	2.47965	3.02035	3.50368	3.7797
Saudi Arabia	0.3497	0.5905	0.45022	0.43765	0.64914	0.74965	0.93183	0.99078	1.0759	1.10185	1.12762	1.18311	1.25714	1.3274	1.39394	1.40652	1.52854	1.67644	1.73116	1.70824	1.84172	1.98518	2.09647	2.22071	2.42851	2.56616	2.64612	2.68071	2.89755	2.82587	3.15763
Syria	0.01635	0.00849	0.00866	0.00847	0.00866	0.00481	0.00866	0.02107	0.01733	0.03398	0.09909	0.11929	0.1223	0.1257	0.12909	0.09988	0.13657	0.15492	0.19534	0.2052	0.20724	0.18991	0.25143	0.25328	0.26252	0.21801	0.22337	0.21443	0.21086	0.23266	0.3195
United Arab Emirates	0.2094	0.24081	0.2094	0.28269	0.36017	0.50675	0.56224	0.71395	0.69102	0.84969	0.81666	0.95905	1.07079	0.98081	0.95469	1.15804	1.24975	1.34256	1.37066	1.40652	1.41909	1.45533	1.60434	1.6561	1.71156	1.73745	1.804	1.86131	1.85761	1.80496	1.89607
Yemen	0	0	0	0	0	0	0	0	0	0	0	0	0	0	0	0	0	0	0	0	0	0	0	0	0	0	0	0	0	0.03002	0.2402
Algeria	0.48498	0.91096	1.11156	1.55052	1.6048	1.6048	1.5694	1.79891	1.92898	2.0169	2.10866	2.28094	2.32528	2.24444	2.13193	2.42112	2.47277	2.74222	2.93525	3.24091	3.31295	3.14102	3.15415	3.21186	3.18997	3.55155	3.47056	3.37612	3.4429	3.24076	3.36748
Angola	0.00961	0.00925	0.01047	0.01298	0.01256	0.01361	0.01466	0.01665	0.01849	0.0159	0.01989	0.02094	0.02108	0.02071	0.01922	0.0207	0.02071	0.02108	0.02145	0.02071	0.02108	0.0196	0.02292	0.02403	0.02773	0.02341	0.02449	0.0299	0.02449	0.02485	0.02644
Benin	0	0	0	0	0	0	0	0	0	0	0	0	0	0	0	0	0	0	0	0	0	0	0	0	0	0	0	0	0	0	0
Botswana	0	0	0	0	0	0	0	0	0	0	0	0	0	0	0	0	0	0	0	0	0	0	0	0	0	0	0	0	0	0	0
Burkina Faso	0	0	0	0	0	0	0	0	0	0	0	0	0	0	0	0	0	0	0	0	0	0	0	0	0	0	0	0	0	0	0
Burundi	0	0	0	0	0	0	0	0	0	0	0	0	0	0	0	0	0	0	0	0	0	0	0	0	0	0	0	0	0	0	0
Cameroon	0	0	0	0	0	0	0	0	0	0	0	0	0	0	0	0	0	0	0	0	0	0	0	0	0	0	0.00072	0.00072	0.00072	0.00072	0.00756
Cape Verde	0	0	0	0	0	0	0	0	0	0	0	0	0	0	0	0	0	0	0	0	0	0	0	0	0	0	0	0	0	0	0
Central African Republic	0	0	0	0	0	0	0	0	0	0	0	0	0	0	0	0	0	0	0	0	0	0	0	0	0	0	0	0	0	0	0
Chad	0	0	0	0	0	0	0	0	0	0	0	0	0	0	0	0	0	0	0	0	0	0	0	0	0	0	0	0	0	0	0
Comoros	0	0	0	0	0	0	0	0	0	0	0	0	0	0	0	0	0	0	0	0	0	0	0	0	0	0	0	0	0	0	0
Congo (Brazzaville)	0.00052	0.00063	0.00063	0.00073	0.00073	0.00209	0.00042	0.00209	0	0	0	0	0	0	0	0	0	0	0	0	0	0	0	0	0	0.00432	0.00648	0.01045	0.01333	0.01909	0.0335
Congo (Kinshasa)	0	0	0	0	0	0	0	0	0	0	0	0	0	0	0	0	0	0	0	0	0	0	0	0	0	0	0	0	0	0	0
Cote dIvoire (IvoryCoast)	0	0	0	0	0	0	0	0	0	0	0	0	0	0	0	0.00148	0.02034	0.02218	0.02958	0.04955	0.04992	0.04992	0.04737	0.04737	0.04596	0.04596	0.04596	0.05303	0.05656	0.05656	0.05303
Djibouti	0	0	0	0	0	0	0	0	0	0	0	0	0	0	0	0	0	0	0	0	0	0	0	0	0	0	0	0	0	0	0
Egypt	0.03141	0.05235	0.09842	0.11873	0.14972	0.18323	0.2094	0.23222	0.25585	0.28618	0.29944	0.33609	0.36553	0.41745	0.44332	0.45959	0.49546	0.49916	0.50803	0.54242	0.67664	0.90773	0.92437	1.10813	1.2039	1.53091	1.62816	1.67499	2.12418	2.25818	2.20919
Equatorial Guinea	0	0	0	0	0	0	0	0	0	0	0	0	0	0	0	0	0	0	0.00074	0.00074	0.00111	0.00111	0.04696	0.04807	0.0037	0.04807	0.04807	0.10797	0.22	0.23183	0.24182
Eritrea	NA	NA	NA	NA	NA	NA	NA	NA	NA	NA	NA	NA	NA	NA	0	0	0	0	0	0	0	0	0	0	0	0	0	0	0	0	0
Ethiopia	0	0	0	0	0	0	0	0	0	0	0	0	0	0	0	0	0	0	0	0	0	0	0	0	0	0	0	0	0	0	0
Gabon	0.00259	0.00222	0.00209	0.00555	0.00555	0.00209	0.00105	0.00429	0.0037	0.00333	0.00314	0.00372	0.0037	0.0037	0.0037	0.0037	0.0037	0.0037	0.0037	0.0037	0.00296	0.00296	0.00333	0.00333	0.0037	0.00357	0.00357	0.00286	0.00286	0.00286	0.00286
Gambia, The	0	0	0	0	0	0	0	0	0	0	0	0	0	0	0	0	0	0	0	0	0	0	0	0	0	0	0	0	0	0	0
Ghana	0	0	0	0	0	0	0	0	0	0	0	0	0	0	0	0	0	0	0	0	0	0	0	0	0	0	0	0	0	0	0
Guinea	0	0	0	0	0	0	0	0	0	0	0	0	0	0	0	0	0	0	0	0	0	0	0	0	0	0	0	0	0	0	0
Guinea-Bissau	0	0	0	0	0	0	0	0	0	0	0	0	0	0	0	0	0	0	0	0	0	0	0	0	0	0	0	0	0	0	0
Kenya	0	0	0	0	0	0	0	0	0	0	0	0	0	0	0	0	0	0	0	0	0	0	0	0	0	0	0	0	0	0	0
Lesotho	0	0	0	0	0	0	0	0	0	0	0	0	0	0	0	0	0	0	0	0	0	0	0	0	0	0	0	0	0	0	0
Liberia	0	0	0	0	0	0	0	0	0	0	0	0	0	0	0	0	0	0	0	0	0	0	0	0	0	0	0	0	0	0	0
Libya	0.18846	0.11517	0.12564	0.14658	0.16961	0.18846	0.20731	0.19788	0.20335	0.22185	0.22929	0.2418	0.25038	0.23516	0.23627	0.23442	0.23738	0.24292	0.23516	0.19227	0.22185	0.2285	0.22961	0.20336	0.29802	0.40704	0.4753	0.55041	0.57274	0.57277	0.60566
Madagascar	0	0	0	0	0	0	0	0	0	0	0	0	0	0	0	0	0	0	0	0	0	0	0	0	0	0	0	0	0	0	0
Malawi	0	0	0	0	0	0	0	0	0	0	0	0	0	0	0	0	0	0	0	0	0	0	0	0	0	0	0	0	0	0	0
Mali	0	0	0	0	0	0	0	0	0	0	0	0	0	0	0	0	0	0	0	0	0	0	0	0	0	0	0	0	0	0	0
Mauritania	0	0	0	0	0	0	0	0	0	0	0	0	0	0	0	0	0	0	0	0	0	0	0	0	0	0	0	0	0	0	0
Mauritius	0	0	0	0	0	0	0	0	0	0	0	0	0	0	0	0	0	0	0	0	0	0	0	0	0	0	0	0	0	0	0
Morocco	0.00259	0.00333	0.00314	0.00335	0.00209	0.00314	0.00314	0.0022	0.00222	0.00222	0.00209	0.00144	0.00089	0.00111	0.00111	0.00074	0.00074	0.00185	0.00185	0.00185	0.00185	0.00185	0.00185	0.00185	0.00185	0.00186	0.00223	0.00134	0.00223	0.00223	0.00223
Mozambique	0	0	0	0	0	0	0	0	0	0	0	0	0	0	0	0	0	0	0.00222	0.00222	0.00222	0.00222	0.00222	0.00296	0.00296	0.0072	0.05944	0.0951	0.1059	0.09654	0.11239
Namibia	NA	NA	NA	NA	NA	NA	NA	NA	NA	NA	0	0	0	0	0	0	0	0	0	0	0	0	0	0	0	0	0	0	0	0	0
Niger	0	0	0	0	0	0	0	0	0	0	0	0	0	0	0	0	0	0	0	0	0	0	0	0	0	0	0	0	0	0	0
Nigeria	0.03957	0.07957	0.05235	0.08502	0.10156	0.11308	0.12145	0.13684	0.1394	0.17378	0.13716	0.1759	0.18118	0.18672	0.16823	0.19189	0.20188	0.2163	0.21815	0.25697	0.46071	0.55092	0.52504	0.75059	0.80605	0.80688	1.02661	1.17069	1.1824	0.93023	1.04426
Reunion	0	0	0	0	0	0	0	0	0	0	0	0	0	0	0	0	0	0	0	0	0	0	0	0	0	0	0	0	0	0	0
Rwanda	0	0	0	0	0	0	0	0	0	0	0	0	0	0	0	0	0	0	0	0	0	0	0	0	0	0	0	0	0	0	0
Saint Helena	0	0	0	0	0	0	0	0	0	0	0	0	0	0	0	0	0	0	0	0	0	0	0	0	0	0	0	0	0	0	0
Sao Tome and Principe	0	0	0	0	0	0	0	0	0	0	0	0	0	0	0	0	0	0	0	0	0	0	0	0	0	0	0	0	0	0	0
Senegal	0	0	0	0	0	0	0	0	0	0	0	0	0	0.00063	0.00127	0.00159	0.0019	0.00127	0.00127	0.00127	0.00159	0.00159	0.00159	0.00159	0.00159	0.00159	0.00159	0.00159	0.00159	0.00159	0.00063
Seychelles	0	0	0	0	0	0	0	0	0	0	0	0	0	0	0	0	0	0	0	0	0	0	0	0	0	0	0	0	0	0	0
Sierra Leone	0	0	0	0	0	0	0	0	0	0	0	0	0	0	0	0	0	0	0	0	0	0	0	0	0	0	0	0	0	0	0
Somalia	0	0	0	0	0	0	0	0	0	0	0	0	0	0	0	0	0	0	0	0	0	0	0	0	0	0	0	0	0	0	0
South Africa	0	0	0	0	0	0	0	0	0	0	0	0	0.00148	0.06655	0.0721	0.07247	0.06807	0.06471	0.05361	0.05176	0.06101	0.07765	0.08504	0.0843	0.08245	0.07925	0.10446	0.05511	0.04899	0.03818	0.03494
Sudan and South Sudan	0	0	0	0	0	0	0	0	0	0	0	0	0	0	0	0	0	0	0	0	0	0	0	0	0	0	0	0	0	0	0
Swaziland	0	0	0	0	0	0	0	0	0	0	0	0	0	0	0	0	0	0	0	0	0	0	0	0	0	0	0	0	0	0	0
Tanzania	0	0	0	0	0	0	0	0	0	0	0	0	0	0	0	0	0	0	0	0	0	0	0	0	0.0044	0.01469	0.01816	0.01909	0.02017	0.0237	0.0281
Togo	0	0	0	0	0	0	0	0	0	0	0	0	0	0	0	0	0	0	0	0	0	0	0	0	0	0	0	0	0	0	0
Tunisia	0.01571	0.01724	0.02225	0.01916	0.02472	0.0173	0.01854	0.01656	0.01528	0.01572	0.01483	0.00989	0.01746	0.01534	0.01451	0.01368	0.03275	0.06882	0.07877	0.07877	0.07794	0.09328	0.08914	0.09494	0.0995	0.10365	0.10365	0.06551	0.0568	0.07504	0.08416
Uganda	0	0	0	0	0	0	0	0	0	0	0	0	0	0	0	0	0	0	0	0	0	0	0	0	0	0	0	0	0	0	0
Western Sahara	0	0	0	0	0	0	0	0	0	0	0	0	0	0	0	0	0	0	0	0	0	0	0	0	0	0	0	0	0	0	0
Zambia	0	0	0	0	0	0	0	0	0	0	0	0	0	0	0	0	0	0	0	0	0	0	0	0	0	0	0	0	0	0	0
Zimbabwe	0	0	0	0	0	0	0	0	0	0	0	0	0	0	0	0	0	0	0	0	0	0	0	0	0	0	0	0	0	0	0
Afghanistan	0.06282	0.08271	0.08502	0.08879	0.089	0.10994	0.10994	0.10386	0.11093	0.1094	0.10889	0.01152	0.01109	0.01109	0.01109	0.00739	0.0085	0.0085	0.0085	0.0085	0.0085	0.00185	0.00185	0.00074	0.00074	0.00074	0.00074	0.00148	0.00185	0.00111	0.00518
American Samoa	0	0	0	0	0	0	0	0	0	0	0	0	0	0	0	0	0	0	0	0	0	0	0	0	0	0	0	0	0	0	0
Australia	0.32918	0.38499	0.4246	0.44397	0.46446	0.49551	0.54127	0.55519	0.57858	0.59501	0.78012	0.81249	0.86837	0.93204	1.00612	1.11495	1.14879	1.13964	1.18331	1.20461	1.25056	1.27884	1.33253	1.37517	1.41274	1.61233	1.69045	1.51665	1.57373	1.76346	1.94066
Bangladesh	0.04705	0.05616	0.06117	0.06455	0.0894	0.0941	0.10633	0.12355	0.14123	0.15452	0.15244	0.16279	0.19407	0.2134	0.23226	0.2548	0.26137	0.26379	0.2835	0.31289	0.33536	0.35611	0.38376	0.43208	0.47003	0.50726	0.55509	0.58951	0.64857	0.71017	0.7214
Bhutan	0	0	0	0	0	0	0	0	0	0	0	0	0	0	0	0	0	0	0	0	0	0	0	0	0	0	0	0	0	0	0
Brunei	0.38362	0.41586	0.39334	0.40183	0.36784	0.35813	0.3557	0.37343	0.36955	0.373	0.38605	0.31966	0.3301	0.33744	0.34314	0.38105	0.37534	0.37412	0.32982	0.34941	0.36568	0.38269	0.40118	0.42151	0.42521	0.44308	0.5317	0.51821	0.51628	0.43537	0.45464
Burma (Myanmar)	0.01152	0.01256	0.01665	0.01958	0.02408	0.02932	0.03979	0.04209	0.03846	0.0403	0.03979	0.03692	0.03635	0.04094	0.05323	0.06105	0.05956	0.05621	0.06551	0.0543	0.10766	0.221	0.31266	0.35733	0.37966	0.48389	0.469	0.50324	0.46155	0.42954	0.44853
Cambodia	0	0	0	0	0	0	0	0	0	0	0	0	0	0	0	0	0	0	0	0	0	0	0	0	0	0	0	0	0	0	0
China	0.58126	0.51795	0.43853	0.49608	0.50414	0.52601	0.55708	0.56894	0.565	0.58126	0.58471	0.60543	0.61378	0.64264	0.67759	0.69884	0.82716	0.93111	0.9547	1.03341	1.00564	1.11857	1.20455	1.26581	1.50421	1.84226	2.15956	2.55635	2.80619	3.10888	3.48412
Cook Islands	0	0	0	0	0	0	0	0	0	0	0	0	0	0	0	0	0	0	0	0	0	0	0	0	0	0	0	0	0	0	0
Fiji	0	0	0	0	0	0	0	0	0	0	0	0	0	0	0	0	0	0	0	0	0	0	0	0	0	0	0	0	0	0	0
French Polynesia	0	0	0	0	0	0	0	0	0	0	0	0	0	0	0	0	0	0	0	0	0	0	0	0	0	0	0	0	0	0	0
Guam	0	0	0	0	0	0	0	0	0	0	0	0	0	0	0	0	0	0	0	0	0	0	0	0	0	0	0	0	0	0	0
Hawaiian Trade Zone	0	0	0	0	0	0	0	NA	NA	NA	NA	NA	NA	NA	NA	NA	NA	NA	NA	NA	NA	NA	NA	NA	NA	NA	NA	NA	NA	NA	NA
Hong Kong	0	0	0	0	0	0	0	0	0	0	0	0	0	0	0	0	0	0	0	0	0	0	0	0	0	0	0	0	0	0	0
India	0.0587	0.07366	0.09995	0.11859	0.1269	0.1516	0.20718	0.26093	0.35681	0.36278	0.45925	0.5168	0.54874	0.61214	0.68328	0.72231	0.72009	0.74127	0.78655	0.77778	0.8216	0.88003	0.95671	0.99688	1.02974	1.09182	1.12468	1.14586	1.17581	1.48582	1.91123
Indonesia	0.71905	0.72915	0.74119	0.84569	1.14014	1.25474	1.30563	1.39498	1.52356	1.60281	1.7622	1.99554	2.10509	2.15024	2.40505	2.43894	2.59715	2.58483	2.4732	2.73149	2.43817	2.05785	2.24878	2.38659	2.21106	2.18065	2.39698	2.64026	2.69453	2.78692	3.09717
Japan	0.08542	0.08173	0.07959	0.08107	0.08293	0.08651	0.08185	0.0843	0.08154	0.07811	0.23868	0.24775	0.24881	0.25551	0.24478	0.25331	0.24315	0.23591	0.2272	0.23016	0.23436	0.22238	0.24972	0.21289	0.22859	0.20528	0.21274	0.22456	0.21953	0.20901	0.20276
Kiribati	0	0	0	0	0	0	0	0	0	0	0	0	0	0	0	0	0	0	0	0	0	0	0	0	0	0	0	0	0	0	0
Korea, North	0	0	0	0	0	0	0	0	0	0	0	0	0	0	0	0	0	0	0	0	0	0	0	0	0	0	0	0	0	0	0
Korea, South	0	0	0	0	0	0	0	0	0	0	0	0	0	0	0	0	0	0	0	0	0	0	0	0	0	0.01944	0.01732	0.01713	0.01748	0.02965	0.03751
Laos	0	0	0	0	0	0	0	0	0	0	0	0	0	0	0	0	0	0	0	0	0	0	0	0	0	0	0	0	0	0	0
Macau	0	0	0	0	0	0	0	0	0	0	0	0	0	0	0	0	0	0	0	0	0	0	0	0	0	0	0	0	0	0	0
Malaysia	0.05841	0.06467	0.0582	0.15436	0.33898	0.45579	0.5507	0.57469	0.60591	0.63207	0.68212	0.77912	0.8306	0.92706	0.97169	1.07395	1.29521	1.42797	1.44284	1.49751	1.68456	1.77604	1.79612	1.93371	2.00064	2.0713	2.07725	2.21596	2.26467	2.24608	2.28587
Maldives	0	0	0	0	0	0	0	0	0	0	0	0	0	0	0	0	0	0	0	0	0	0	0	0	0	0	0	0	0	0	0
Mongolia	0	0	0	0	0	0	0	0	0	0	0	0	0	0	0	0	0	0	0	0	0	0	0	0	0	0	0	0	0	0	0
Nauru	0	0	0	0	0	0	0	0	0	0	0	0	0	0	0	0	0	0	0	0	0	0	0	0	0	0	0	0	0	0	0
Nepal	0	0	0	0	0	0	0	0	0	0	0	0	0	0	0	0	0	0	0	0	0	0	0	0	0	0	0	0	0	0	0
New Caledonia	0	0	0	0	0	0	0	0	0	0	0	0	0	0	0	0	0	0	0	0	0	0	0	0	0	0	0	0	0	0	0
New Zealand	0.03652	0.04439	0.07738	0.08327	0.10541	0.1342	0.16096	0.15505	0.1698	0.17408	0.17289	0.1886	0.20008	0.17937	0.1819	0.17192	0.19595	0.20971	0.18361	0.21216	0.21393	0.23607	0.22582	0.16987	0.15285	0.13777	0.15102	0.16079	0.15166	0.15844	0.16996
Niue	0	0	0	0	0	0	0	0	0	0	0	0	0	0	0	0	0	0	0	0	0	0	0	0	0	0	0	0	0	0	0
Pakistan	0.2789	0.30771	0.34515	0.33345	0.33064	0.34091	0.36613	0.39153	0.41527	0.44364	0.45019	0.49876	0.51437	0.54452	0.5858	0.60328	0.65045	0.65243	0.66298	0.73225	0.79921	0.72334	0.70439	0.77425	0.8399	0.94304	1.10593	1.12675	1.16349	1.18523	1.2134
Papua New Guinea	0	0	0	0	0	0	0	0	0	0	0	0	0.00222	0.00296	0.00185	0.0037	0.00481	0.00407	0.00407	0.00407	0.00407	0.00407	0.00407	0.00518	0.00518	0.0037	0.00518	0.00503	0.00481	0.0037	0.00407
Philippines	0	0	0	0	0	0	0	0	0	0	0	0	0	0	0	0.00034	0.00035	0.00035	0.00035	0.00035	0.00035	0.0069	0.07254	0.10518	0.10518	0.10528	0.07987	0.10528	0.10673	0.11436	0.10564
Samoa	0	0	0	0	0	0	0	0	0	0	0	0	0	0	0	0	0	0	0	0	0	0	0	0	0	0	0	0	0	0	0
Singapore	0	0	0	0	0	0	0	0	0	0	0	0	0	0	0	0	0	0	0	0	0	0	0	0	0	0	0	0	0	0	0
Solomon Islands	0	0	0	0	0	0	0	0	0	0	0	0	0	0	0	0	0	0	0	0	0	0	0	0	0	0	0	0	0	0	0
Sri Lanka	0	0	0	0	0	0	0	0	0	0	0	0	0	0	0	0	0	0	0	0	0	0	0	0	0	0	0	0	0	0	0
Taiwan	0.04502	0.05553	0.04921	0.04921	0.05444	0.05235	0.04188	0.04523	0.02514	0.05251	0.08376	0.03435	0.03108	0.02931	0.03249	0.03355	0.03214	0.03284	0.03143	0.03143	0.03143	0.03002	0.03284	0.02931	0.03002	0.02825	0.01519	0.01342	0.01095	0.01095	0.00918
Thailand	0	0.04	0.047	0.0569	0.07	0.128	0.112	0.1315	0.19281	0.18211	0.208	0.236	0.249	0.31042	0.34184	0.36763	0.41852	0.52548	0.55549	0.61104	0.64244	0.64417	0.68937	0.75078	0.78964	0.81772	0.83911	0.89707	0.9923	1.06545	1.25141
Timor-Leste (East Timor)	NA	NA	NA	NA	NA	NA	NA	NA	NA	NA	NA	NA	NA	NA	NA	NA	NA	NA	NA	NA	NA	NA	NA	0	0	0	0	0	0	0	0
Tonga	0	0	0	0	0	0	0	0	0	0	0	0	0	0	0	0	0	0	0	0	0	0	0	0	0	0	0	0	0	0	0
U.S. Pacific Islands	0	0	0	0	0	0	0	0	0	0	0	0	0	0	0	0	0	0	0	0	0	0	0	0	0	0	0	0	0	0	0
Vanuatu	0	0	0	0	0	0	0	0	0	0	0	0	0	0	0	0	0	0	0	0	0	0	0	0	0	0	0	0	0	0	0
Vietnam	0	0.00036	0.00232	0.00232	0.00218	0.00145	0.00145	0.00145	0.00109	0.00109	0.00145	0.00253	0.00761	0.00915	0.00915	0.02597	0.03037	0.00841	0.02561	0.03659	0.04207	0.04756	0.08269	0.09878	0.10976	0.14635	0.20854	0.21586	0.25537	0.2594	0.30037
Wake Island	0	0	0	0	0	0	0	0	0	0	0	0	0	0	0	0	0	0	0	0	0	0	0	0	0	0	0	0	0	0	0
