# Supplementary material
Source: MDPI journal article supplement (https://www.mdpi.com/1099-4300/15/12/5565)
Supplement: s2 [file s2 › Sources/data/Natural Gas Use.csv]

Region	1980	1981	1982	1983	1984	1985	1986	1987	1988	1989	1990	1991	1992	1993	1994	1995	1996	1997	1998	1999	2000	2001	2002	2003	2004	2005	2006	2007	2008	2009	2010	2011
North America	22.99389	22.52281	21.24996	20.11535	21.44691	20.94839	19.67609	20.72203	21.77161	22.98727	23.03305	23.52853	24.41776	25.04986	25.7016	26.7644	27.29952	27.4347	27.05817	27.42491	28.34326	27.44868	28.36313	28.00632	28.03724	27.76051	27.93589	28.94269	29.10032	28.72133	29.96435	30.87566
Bermuda	0	0	0	0	0	0	0	0	0	0	0	0	0	0	0	0	0	0	0	0	0	0	0	0	0	0	0	0	0	0	0	0
Canada	1.91491	1.86417	1.90217	1.90034	2.05577	2.20417	2.16031	2.14368	2.37063	2.46086	2.41091	2.43649	2.63982	2.73646	2.83341	2.9328	2.98429	2.95366	2.86465	3.17902	3.05118	3.19009	3.24322	3.45726	3.4245	3.49574	3.41591	3.2024	3.09189	3.15807	3.01182	3.27108
Greenland	0	0	0	0	0	0	0	0	0	0	0	0	0	0	0	0	0	0	0	0	0	0	0	0	0	0	0	0	0	0	0	0
Mexico	0.84352	0.91133	0.99157	0.99417	0.99753	1.04073	0.92441	0.93855	0.95259	0.92472	1.01898	1.05908	1.06431	1.0845	1.14013	1.16046	1.23059	1.25833	1.36329	1.33666	1.4681	1.48603	1.60983	1.71842	1.68968	1.69941	2.28124	2.07754	2.16548	2.14732	2.37778	2.74496
Saint Pierre and Miquelon	0	0	0	0	0	0	0	0	0	0	0	0	0	0	0	0	0	0	0	0	0	0	0	0	0	0	0	0	0	0	0	0
United States	20.23546	19.74731	18.35622	17.22084	18.39361	17.70348	16.59136	17.6398	18.44839	19.60169	19.60317	20.03296	20.71363	21.2289	21.72807	22.67114	23.08465	23.22272	22.83023	22.90923	23.82398	22.77256	23.51008	22.83064	22.92306	22.56536	22.23874	23.66276	23.84295	23.41594	24.57475	24.85963
Central & South America	1.38977	1.48129	1.58054	1.57959	1.88437	1.94045	1.97207	1.88586	2.01877	2.30458	2.20169	2.35601	2.33762	2.49707	2.65086	2.80192	3.00298	3.17318	3.39571	3.32456	3.56844	3.83434	3.7813	3.95009	4.38013	4.51973	4.85124	4.68869	4.98328	4.68082	5.48566	5.57816
Antarctica	0	0	0	0	0	0	0	0	0	0	0	0	0	0	0	0	0	0	0	0	0	0	0	0	0	0	0	0	0	0	0	0
Antigua and Barbuda	0	0	0	0	0	0	0	0	0	0	0	0	0	0	0	0	0	0	0	0	0	0	0	0	0	0	0	0	0	0	0	0
Argentina	0.36833	0.37141	0.46786	0.46067	0.58687	0.59303	0.64125	0.62042	0.73155	0.82176	0.73517	0.81595	0.82259	0.87057	0.89493	0.99604	1.05583	1.05325	1.12595	1.19422	1.22559	1.15215	1.11709	1.27615	1.39904	1.4924	1.54112	1.62083	1.63891	1.59205	1.59758	1.70276
Aruba	NA	NA	NA	NA	NA	NA	0	0	0	0	0	0	0	0	0	0	0	0	0	0	0	0	0	0	0	0	0	0	0	0	0	0
Bahamas, The	0	0	0	0	0	0	0	0	0	0	0	0	0	0	0	0	0	0	0	0	0	0	0	0	0	0	0	0	0	0	0	0
Barbados	0.00037	0.00037	0.00037	0.00042	0.00042	0.00042	0.00042	0.00037	0.00097	0.00105	0.00105	0.00083	0.0008	0.00112	0.00082	0.00097	0.00108	0.00108	0.00108	0.00108	0.00108	0.00108	0.00108	0.00108	0.00108	0.00108	0.00108	0.00104	0.00118	0.00074	0.00074	0
Belize	0	0	0	0	0	0	0	0	0	0	0	0	0	0	0	0	0	0	0	0	0	0	0	0	0	0	0	0	0	0	0	0
Bolivia	0.01306	0.01959	0.012	0.015	0.014	0.011	0.014	0.01367	0.01942	0.02614	0.03	0.026	0.032	0.03002	0.03496	0.045	0.03875	0.04945	0.03211	0.03321	0.0465	0.03026	0.03764	0.08267	0.07897	0.07787	0.08857	0.09263	0.10595	0.10444	0.10038	0.09115
Brazil	0.05662	0.05662	0.05092	0.0631	0.08192	0.10184	0.09963	0.11602	0.1079	0.13565	0.11398	0.13966	0.15299	0.15184	0.15829	0.16564	0.18547	0.20274	0.21302	0.2402	0.34671	0.41208	0.49178	0.51933	0.63245	0.69533	0.72261	0.74203	0.88364	0.69944	0.94155	0.93632
Cayman Islands	0	0	0	0	0	0	0	0	0	0	0	0	0	0	0	0	0	0	0	0	0	0	0	0	0	0	0	0	0	0	0	0
Chile	0.085	0.085	0.049	0.046	0.048	0.044	0.026	0.02578	0.03532	0.05686	0.066	0.052	0.05444	0.0618	0.06851	0.0671	0.06712	0.10383	0.11977	0.1702	0.19319	0.23509	0.23857	0.29303	0.30711	0.31637	0.27858	0.16458	0.10195	0.12024	0.19638	0.20834
Colombia	0.1188	0.1272	0.1272	0.1224	0.1716	0.1728	0.1728	0.13006	0.13582	0.13549	0.14028	0.144	0.14009	0.14585	0.15092	0.14927	0.15551	0.19586	0.20538	0.16994	0.187	0.1998	0.2021	0.1998	0.20275	0.21883	0.23687	0.24737	0.24606	0.2851	0.29789	0.29002
Costa Rica	0	0	0	0	0	0	0	0	0	0	0	0	0	0	0	0	0	0	0	0	0	0	0	0	0	0	0	0	0	0	0	0
Cuba	0.00062	0.00032	0.00032	0.00028	0.00013	0.00025	0.00021	0.00082	0.00074	0.00115	0.00119	0.00124	0.00128	0.00131	0.00128	0.00152	0.00159	0.02773	0.01479	0.01849	0.02218	0.01109	0.01294	0.01368	0.01368	0.01479	0.01479	0.02218	0.04289	0.04289	0.03956	0.03808
Dominica	0	0	0	0	0	0	0	0	0	0	0	0	0	0	0	0	0	0	0	0	0	0	0	0	0	0	0	0	0	0	0	0
Dominican Republic	0	0	0	0	0	0	0	0	0	0	0	0	0	0	0	0	0	0	0	0	0	0	0	0.01109	0.00481	0.00924	0.00924	0.01775	0.01738	0.02071	0.03032	0.03439
Ecuador	0.0039	0.0026	0.0026	0.0039	0.0052	0.0052	0.0039	0.00252	0.00367	0.00367	0.0052	0.00419	0.00459	0.00459	0.00459	0.00551	0.00551	0.00459	0.00459	0.00459	0.00643	0.00735	0.00459	0.00689	0.0078	0.01194	0.01285	0.01263	0.01194	0.01359	0.01515	0.01102
El Salvador	0	0	0	0	0	0	0	0	0	0	0	0	0	0	0	0	0	0	0	0	0	0	0	0	0	0	0	0	0	0	0	0
Falkland Islands (Islas Malvinas)	0	0	0	0	0	0	0	0	0	0	0	0	0	0	0	0	0	0	0	0	0	0	0	0	0	0	0	0	0	0	0	0
French Guiana	0	0	0	0	0	0	0	0	0	0	0	0	0	0	0	0	0	0	0	0	0	0	0	0	0	0	0	0	0	0	0	0
Grenada	0	0	0	0	0	0	0	0	0	0	0	0	0	0	0	0	0	0	0	0	0	0	0	0	0	0	0	0	0	0	0	0
Guadeloupe	0	0	0	0	0	0	0	0	0	0	0	0	0	0	0	0	0	0	0	0	0	0	0	0	0	0	0	0	0	0	0	0
Guatemala	0	0	0	0	0	0	0	0	0	0	0	0	0	0	0	0	0	0	0	0	0	0	0	0	0	0	0	0	0	0	0	0
Guyana	0	0	0	0	0	0	0	0	0	0	0	0	0	0	0	0	0	0	0	0	0	0	0	0	0	0	0	0	0	0	0	0
Haiti	0	0	0	0	0	0	0	0	0	0	0	0	0	0	0	0	0	0	0	0	0	0	0	0	0	0	0	0	0	0	0	0
Honduras	0	0	0	0	0	0	0	0	0	0	0	0	0	0	0	0	0	0	0	0	0	0	0	0	0	0	0	0	0	0	0	0
Jamaica	0	0	0	0	0	0	0	0	0	0	0	0	0	0	0	0	0	0	0	0	0	0	0	0	0	0	0	0	0	0	0	0
Martinique	0	0	0	0	0	0	0	0	0	0	0	0	0	0	0	0	0	0	0	0	0	0	0	0	0	0	0	0	0	0	0	0
Montserrat	0	0	0	0	0	0	0	0	0	0	0	0	0	0	0	0	0	0	0	0	0	0	0	0	0	0	0	0	0	0	0	0
Netherlands Antilles	0	0	0	0	0	0	0	0	0	0	0	0	0	0	0	0	0	0	0	0	0	0	0	0	0	0	0	0	0	0	0	0
Nicaragua	0	0	0	0	0	0	0	0	0	0	0	0	0	0	0	0	0	0	0	0	0	0	0	0	0	0	0	0	0	0	0	0
Panama	0	0	0	0	0	0	0	0	0	0	0	0	0	0	0	0	0	0	0	0	0	0	0	0	0	0	0	0	0	0	0	0
Paraguay	0	0	0	0	0	0	0	0	0	0	0	0	0	0	0	0	0	0	0	0	0	0	0	0	0	0	0	0	0	0	0	0
Peru	0.04268	0.05228	0.04908	0.04908	0.04908	0.05015	0.05228	0.04396	0.04101	0.03774	0.01765	0.01706	0.0166	0.03149	0.03215	0.03051	0.03182	0.00787	0.01345	0.01345	0.01115	0.01214	0.01444	0.01706	0.03663	0.06729	0.07581	0.11372	0.15545	0.14779	0.23382	0.24319
Puerto Rico	0	0	0	0	0	0	0	0	0	0	0	0	0	0	0	0	0	0	0	0	0.01294	0.02329	0.02329	0.02736	0.02514	0.02477	0.02662	0.02722	0.02982	0.02798	0.02847	0.02773
Saint Kitts and Nevis	0	0	0	0	0	0	0	0	0	0	0	0	0	0	0	0	0	0	0	0	0	0	0	0	0	0	0	0	0	0	0	0
Saint Lucia	0	0	0	0	0	0	0	0	0	0	0	0	0	0	0	0	0	0	0	0	0	0	0	0	0	0	0	0	0	0	0	0
Saint Vincent/Grenadines	0	0	0	0	0	0	0	0	0	0	0	0	0	0	0	0	0	0	0	0	0	0	0	0	0	0	0	0	0	0	0	0
Suriname	0	0	0	0	0	0	0	0	0	0	0	0	0	0	0	0	0	0	0	0	0	0	0	0	0	0	0	0	0	0	0	0
Trinidad and Tobago	0.08465	0.08465	0.10659	0.13272	0.20064	0.22572	0.15884	0.14976	0.1609	0.16976	0.18497	0.21005	0.20297	0.22781	0.26092	0.2801	0.31627	0.34321	0.34321	0.35207	0.37015	0.4148	0.44211	0.47348	0.52219	0.60043	0.7451	0.74731	0.80968	0.77351	0.86061	0.84732
Turks and Caicos Islands	0	0	0	0	0	0	0	0	0	0	0	0	0	0	0	0	0	0	0	0	0	0	0	0	0	0	0	0	0	0	0	0
Uruguay	0	0	0	0	0	0	0	0	0	0	0	0	0	0	0	0	0	0	0	0.00074	0.00148	0.00148	0.00074	0.00222	0.00444	0.00333	0.00444	0.00333	0.00259	0.00148	0.00296	0.00296
Venezuela	0.61575	0.68125	0.7146	0.68602	0.72651	0.73604	0.80273	0.78249	0.78147	0.91531	0.90621	0.94503	0.90926	0.97067	1.04351	1.06025	1.14404	1.18357	1.32237	1.12637	1.14404	1.33373	1.19493	1.02627	1.14404	0.98606	1.09356	0.87607	0.93584	0.85088	1.14025	1.14488
Virgin Islands, U.S.	0	0	0	0	0	0	0	0	0	0	0	0	0	0	0	0	0	0	0	0	0	0	0	0	0	0	0	0	0	0	0	0
Virgin Islands, British	0	0	0	0	0	0	0	0	0	0	0	0	0	0	0	0	0	0	0	0	0	0	0	0	0	0	0	0	0	0	0	0
Europe	10.64285	10.51413	10.55325	10.78758	11.33933	11.66896	12.01085	12.5675	12.29342	12.92807	13.02775	13.58082	13.26477	13.82736	13.95807	15.34564	16.54943	16.29654	16.61208	17.32697	17.77013	18.36282	18.58461	19.63426	20.33112	20.69196	20.6554	20.56062	21.00802	19.8476	20.93464	19.46606
Albania	0.01047	0.01109	0.01047	0.0111	0.01131	0.01047	0.01466	0.01665	0.02589	0.02589	0.00943	0.00522	0.00376	0.00111	0.00111	0.00111	0.00111	0.00074	0.00111	0.00074	0.00111	0.00111	0.00111	0.00111	0.00111	0.00111	0.00111	0.00037	0.00111	0.00111	0.00037	0.00037
Austria	0.18487	0.17273	0.16718	0.17055	0.18904	0.20285	0.19638	0.20516	0.1954	0.20943	0.23091	0.24168	0.23733	0.25032	0.25764	0.27855	0.29923	0.28838	0.29608	0.30107	0.2726	0.28868	0.29194	0.31567	0.31534	0.34193	0.31153	0.31843	0.33646	0.32967	0.36223	0.34297
Belgium	0.39502	0.36335	0.29983	0.31623	0.32623	0.32559	0.29009	0.32345	0.318	0.35376	0.36275	0.38512	0.39691	0.41654	0.42589	0.47116	0.5247	0.50052	0.55122	0.58687	0.58985	0.58232	0.60015	0.63938	0.65156	0.64051	0.65927	0.6642	0.65969	0.66616	0.74521	0.63494
Bosnia and Herzegovina	NA	NA	NA	NA	NA	NA	NA	NA	NA	NA	NA	NA	0.01754	0.01405	0.01451	0.08583	0.0049	0.0049	0.00701	0.00701	0.01051	0.01051	0.00561	0.00561	0.01051	0.01435	0.01435	0.01148	0.01112	0.00753	0.00825	0.00825
Bulgaria	0.16992	0.1567	0.16992	0.1737	0.17086	0.20674	0.21218	0.21062	0.20847	0.21013	0.22726	0.198	0.18414	0.17026	0.16642	0.20607	0.21707	0.18043	0.13409	0.11865	0.19224	0.20435	0.16723	0.18963	0.18627	0.19337	0.20053	0.11996	0.11495	0.07413	0.09096	0.10922
Croatia	NA	NA	NA	NA	NA	NA	NA	NA	NA	NA	NA	NA	0.10053	0.10863	0.0954	0.08578	0.09244	0.10353	0.09872	0.09835	0.10242	0.10501	0.09474	0.10954	0.09867	0.09642	0.09786	0.0999	0.10628	0.0961	0.10176	0.10295
Cyprus	0	0	0	0	0	0	0	0	0	0	0	0	0	0	0	0	0	0	0	0	0	0	0	0	0	0	0	0	0	0	0	0
Czech Republic	NA	NA	NA	NA	NA	NA	NA	NA	NA	NA	NA	NA	NA	0.26141	0.241	0.28869	0.33238	0.33721	0.33769	0.3405	0.33041	0.35398	0.34239	0.34585	0.34347	0.33927	0.33373	0.31131	0.31261	0.29538	0.33559	0.32344
Denmark	0	0	0	0.00222	0.00741	0.02931	0.04955	0.06346	0.07016	0.07485	0.0795	0.08954	0.09421	0.1068	0.1184	0.13961	0.1621	0.18508	0.19095	0.2021	0.20643	0.20412	0.20404	0.20649	0.20554	0.19743	0.20118	0.17968	0.18117	0.17365	0.19664	0.16485
Faroe Islands	0	0	0	0	0	0	0	0	0	0	0	0	0	0	0	0	0	0	0	0	0	0	0	0	0	0	0	0	0	0	0	0
Finland	0.03251	0.02685	0.02409	0.02351	0.02803	0.0357	0.04377	0.058	0.06215	0.08187	0.09643	0.1015	0.10542	0.10911	0.12094	0.12496	0.1308	0.12861	0.14711	0.14711	0.15051	0.16313	0.16234	0.17962	0.17349	0.15897	0.17073	0.16395	0.1698	0.15362	0.16913	0.14819
Former Czechoslovakia	0.33508	0.3367	0.35328	0.35846	0.3771	0.39927	0.41889	0.4463	0.41851	0.45331	0.53519	0.4909	0.40031	NA	NA	NA	NA	NA	NA	NA	NA	NA	NA	NA	NA	NA	NA	NA	NA	NA	NA	NA
Former Serbia and Montenegro	NA	NA	NA	NA	NA	NA	NA	NA	NA	NA	NA	NA	0.07491	0.03557	0.06028	0.04085	0.10283	0.10175	0.10871	0.06393	0.02008	0.02226	0.08467	0.08134	0.08652	0.08874	NA	NA	NA	NA	NA	NA
Former Yugoslavia	0.14249	0.16485	0.16275	0.15809	0.208	0.22069	0.23766	0.27866	0.27353	0.30462	0.26313	0.26207	NA	NA	NA	NA	NA	NA	NA	NA	NA	NA	NA	NA	NA	NA	NA	NA	NA	NA	NA	NA
France	0.9301	0.96246	0.931	0.97381	1.03164	1.0634	1.07456	1.08991	1.05268	1.07038	1.08773	1.23192	1.24621	1.25571	1.24951	1.27498	1.40763	1.39625	1.42975	1.50156	1.57677	1.65326	1.69464	1.66336	1.76562	1.88129	1.92473	1.79043	1.87709	1.79536	1.83204	1.87212
Germany	NA	NA	NA	NA	NA	NA	NA	NA	NA	NA	NA	2.47897	2.44633	2.53269	2.65375	3.05739	3.06153	2.93357	3.04852	3.07851	3.04235	3.1811	3.15959	3.52304	3.49017	3.43319	3.48127	3.37001	3.44792	3.29233	3.26985	2.82529
Germany, East	0.19227	0.19422	0.1911	0.19344	0.22932	0.2262	0.23478	0.21645	0.23478	0.22932	0.13923	NA	NA	NA	NA	NA	NA	NA	NA	NA	NA	NA	NA	NA	NA	NA	NA	NA	NA	NA	NA	NA
Germany, West	1.88966	1.78932	1.63747	1.68809	1.77245	1.74581	1.76978	1.93406	1.87723	1.99534	2.05297	NA	NA	NA	NA	NA	NA	NA	NA	NA	NA	NA	NA	NA	NA	NA	NA	NA	NA	NA	NA	NA
Gibraltar	0	0	0	0	0	0	0	0	0	0	0	0	0	0	0	0	0	0	0	0	0	0	0	0	0	0	0	0	0	0	0	0
Greece	0	0	0.0032	0.00305	0.00335	0.00288	0.00431	0.00432	0.00577	0.00577	0.00561	0.00588	0.00578	0.00411	0.00209	0.00189	0.00215	0.00755	0.03199	0.05377	0.07515	0.07423	0.07947	0.08936	0.09848	0.10388	0.12106	0.14702	0.15574	0.12957	0.14249	0.17615
Hungary	0.35132	0.35924	0.37523	0.374	0.38079	0.38864	0.41231	0.40935	0.40507	0.41276	0.39203	0.38946	0.34194	0.36823	0.37198	0.40466	0.45117	0.42826	0.43097	0.43667	0.42456	0.47213	0.47345	0.5199	0.51241	0.53336	0.50656	0.47177	0.46597	0.40339	0.43273	0.41222
Iceland	0	0	0	0	0	0	0	0	0	0	0	0	0	0	0	0	0	0	0	0	0	0	0	0	0	0	0	0	0	0	0	0
Ireland	0.03232	0.04949	0.07373	0.07784	0.08274	0.08752	0.05935	0.05954	0.07169	0.0808	0.08266	0.08476	0.08374	0.09504	0.09671	0.10299	0.11681	0.12228	0.12363	0.13212	0.1515	0.15796	0.16143	0.16218	0.16559	0.15725	0.17819	0.19211	0.19548	0.18948	0.20728	0.18304
Italy	0.99437	0.96416	0.96041	0.98752	1.16322	1.18206	1.24952	1.38765	1.50408	1.62392	1.72255	1.83003	1.81312	1.84962	1.78659	1.96863	2.03176	2.09466	2.25524	2.4512	2.55582	2.56283	2.54545	2.8064	2.91218	3.11652	3.05214	3.06709	3.06659	2.81879	3.00207	2.81493
Luxembourg	0.01886	0.01434	0.01207	0.01145	0.01203	0.01309	0.01297	0.01511	0.0162	0.01834	0.0185	0.01969	0.02053	0.02133	0.02152	0.02457	0.02695	0.02763	0.0279	0.02892	0.02949	0.03062	0.04639	0.04694	0.05287	0.05197	0.05425	0.05064	0.04822	0.04907	0.05275	0.0455
Macedonia	NA	NA	NA	NA	NA	NA	NA	NA	NA	NA	NA	NA	0.00948	0.01048	0	0	0	0	0.00071	0.00143	0	0	0	0	0.00358	0.00357	0.00357	0.00285	0.0025	0.00285	0.00357	0
Malta	0	0	0	0	0	0	0	0	0	0	0	0	0	0	0	0	0	0	0	0	0	0	0	0	0	0	0	0	0	0	0	0
Montenegro	NA	NA	NA	NA	NA	NA	NA	NA	NA	NA	NA	NA	NA	NA	NA	NA	NA	NA	NA	NA	NA	NA	NA	NA	NA	NA	0	0	0	0	0	0
Netherlands	1.33474	1.27037	1.35083	1.29854	1.37712	1.45223	1.44828	1.49477	1.35262	1.3857	1.37229	1.53321	1.49201	1.53214	1.47901	1.52065	1.67519	1.57599	1.56617	1.52428	1.54253	1.58126	1.57987	1.58679	1.61921	1.55661	1.51274	1.47089	1.53379	1.54748	1.73361	1.51356
Norway	0.03832	0.03749	0.04176	0.04979	0.04416	0.05201	0.09377	0.06538	0.07602	0.07932	0.08728	0.08486	0.14274	0.09896	0.10338	0.11371	0.11327	0.14178	0.13794	0.16775	0.15198	0.1755	0.20519	0.23924	0.30389	0.20102	0.12772	0.16624	0.13101	0.2456	0.20708	0.15504
Poland	0.3733	0.36143	0.35474	0.36067	0.37501	0.38128	0.41101	0.4242	0.42481	0.41735	0.38985	0.34952	0.3421	0.35918	0.3678	0.3851	0.43292	0.43378	0.43031	0.40847	0.44048	0.4507	0.44129	0.48541	0.51933	0.53995	0.54287	0.54098	0.54645	0.53194	0.5719	0.56577
Portugal	0	0	0	0	0	0	0	0	0	0	0	0	0	0	0	0	0	0.0038	0.03048	0.08518	0.08913	0.09888	0.12038	0.11624	0.14566	0.16541	0.16038	0.16675	0.18102	0.18232	0.19797	0.19887
Romania	1.33857	1.35569	1.50977	1.54722	1.49265	1.42952	1.5087	1.50366	1.39699	1.48125	1.34927	1.04936	0.94427	0.9083	0.85074	0.90053	0.89382	0.82575	0.64655	0.61906	0.59795	0.69292	0.64239	0.63186	0.63122	0.5926	0.60628	0.55809	0.51706	0.41905	0.41905	0.44836
Serbia	NA	NA	NA	NA	NA	NA	NA	NA	NA	NA	NA	NA	NA	NA	NA	NA	NA	NA	NA	NA	NA	NA	NA	NA	NA	NA	0.08163	0.07808	0.07986	0.06176	0.07737	0.08412
Slovakia	NA	NA	NA	NA	NA	NA	NA	NA	NA	NA	NA	NA	NA	0.22037	0.20607	0.27408	0.24222	0.24585	0.24997	0.25296	0.25478	0.27199	0.25859	0.25003	0.24254	0.26033	0.23707	0.22435	0.22789	0.19498	0.22077	0.20374
Slovenia	NA	NA	NA	NA	NA	NA	NA	NA	NA	NA	NA	NA	0.02336	0.02879	0.02777	0.03696	0.0479	0.03333	0.03496	0.03584	0.03624	0.03732	0.0348	0.03638	0.03886	0.04033	0.03965	0.04029	0.03871	0.03667	0.03803	0.03241
Spain	0.06395	0.0753	0.08136	0.08704	0.08266	0.0943	0.10005	0.1142	0.14745	0.19522	0.21888	0.24624	0.25967	0.2563	0.27303	0.34039	0.38093	0.49845	0.51173	0.58577	0.63612	0.68548	0.78374	0.88831	1.0312	1.21715	1.30595	1.40436	1.5392	1.37427	1.37519	1.2869
Sweden	0	0	0	0	0	0.00295	0.00792	0.01088	0.01282	0.01884	0.02275	0.02374	0.02699	0.02986	0.02937	0.02969	0.03074	0.03091	0.03007	0.0339	0.03121	0.03506	0.03537	0.03702	0.03549	0.03302	0.03306	0.03669	0.03135	0.04477	0.06025	0.05218
Switzerland	0.03781	0.04088	0.04354	0.04786	0.05336	0.05591	0.05723	0.06136	0.06181	0.06731	0.07197	0.08073	0.08492	0.08905	0.0878	0.0968	0.10474	0.10113	0.10413	0.10788	0.10727	0.11163	0.10958	0.11582	0.1195	0.12268	0.11928	0.11618	0.12387	0.11892	0.13289	0.11802
Turkey	0	0	0.00103	0.00258	0.00145	0.00206	0.01646	0.02675	0.0442	0.11719	0.1259	0.15382	0.16823	0.18696	0.19771	0.25518	0.30806	0.36754	0.38931	0.46189	0.548	0.58953	0.64969	0.78167	0.82507	1.00445	1.14528	1.34161	1.33812	1.27481	1.38416	1.62325
United Kingdom	1.77689	1.80746	1.79849	1.87084	1.91938	2.05849	2.08666	2.14761	2.03708	2.01538	2.08371	2.24462	2.19828	2.50645	2.65165	2.83483	3.35408	3.19687	3.25907	3.49351	3.60267	3.56496	3.60908	3.58011	3.74576	3.60531	3.43144	3.4549	3.56701	3.33686	3.56345	3.01942
Eurasia	13.86112	14.42556	15.50648	16.80518	19.10438	20.95166	22.08157	23.04625	24.71792	25.16631	25.60999	25.31417	24.19782	24.08864	22.02476	20.91598	19.77942	18.94145	18.84478	19.0297	19.81994	19.67303	20.66674	21.57761	22.50838	22.38461	22.86172	23.16735	23.55166	19.60162	21.66472	25.4685
Armenia	NA	NA	NA	NA	NA	NA	NA	NA	NA	NA	NA	NA	0.06877	0.05176	0.05916	0.05916	0.06656	0.04807	0.05176	0.0477	0.05213	0.05176	0.0403	0.04881	0.04918	0.06286	0.06286	0.07595	0.07136	0.05731	0.06397	0.07543
Azerbaijan	NA	NA	NA	NA	NA	NA	NA	NA	NA	NA	NA	NA	0.54723	0.40673	0.34756	0.33278	0.34387	0.33869	0.20669	0.22185	0.20928	0.24847	0.32923	0.33627	0.36507	0.38123	0.41502	0.34061	0.44091	0.38186	0.36437	0.4613
Belarus	NA	NA	NA	NA	NA	NA	NA	NA	NA	NA	NA	NA	0.66981	0.62184	0.516	0.46876	0.5127	0.55299	0.56507	0.63026	0.71782	0.65919	0.62037	0.65772	0.60117	0.74342	0.76796	0.76027	0.77828	0.65003	0.79908	0.77784
Estonia	NA	NA	NA	NA	NA	NA	NA	NA	NA	NA	NA	NA	0.05276	0.02125	0.02267	0.02636	0.02885	0.03743	0.05656	0.03535	0.03967	0.04498	0.04737	0.04984	0.0509	0.0547	0.05294	0.03548	0.03404	0.0235	0.02523	0.02202
Former U.S.S.R.	13.86112	14.42556	15.50648	16.80518	19.10438	20.95166	22.08157	23.04625	24.71792	25.16631	25.60999	25.31417	NA	NA	NA	NA	NA	NA	NA	NA	NA	NA	NA	NA	NA	NA	NA	NA	NA	NA	NA	NA
Georgia	NA	NA	NA	NA	NA	NA	NA	NA	NA	NA	NA	NA	0.18488	0.08874	0.05916	0.07765	0.06656	0.07025	0.06877	0.04289	0.04474	0.04289	0.05404	0.03787	0.04522	0.05495	0.05253	0.06296	0.06446	0.06371	0.06147	0.05551
Kazakhstan	NA	NA	NA	NA	NA	NA	NA	NA	NA	NA	NA	NA	0.74319	0.54723	0.55462	0.40145	0.53392	0.51765	0.49546	0.50286	0.51395	0.52874	0.55092	0.33632	0.50541	0.49909	0.54593	0.46185	0.32793	0.31872	0.3175	0.45664
Kyrgyzstan	NA	NA	NA	NA	NA	NA	NA	NA	NA	NA	NA	NA	0.08756	0.08187	0.06579	0.03253	0.06745	0.07099	0.07077	0.07062	0.07073	0.07454	0.04437	0.02725	0.03398	0.02736	0.02869	0.02841	0.02773	0.02423	0.0171	0.01479
Latvia	NA	NA	NA	NA	NA	NA	NA	NA	NA	NA	NA	NA	0.05673	0.02836	0.02482	0.03889	0.03532	0.04582	0.046	0.04565	0.05662	0.06016	0.0601	0.06357	0.06745	0.06858	0.06717	0.05833	0.04489	0.05515	0.05373	0.05585
Lithuania	NA	NA	NA	NA	NA	NA	NA	NA	NA	NA	NA	NA	0.14267	0.08561	0.08203	0.09898	0.092	0.10293	0.11403	0.07625	0.09173	0.09737	0.10196	0.1069	0.10302	0.10725	0.10266	0.12136	0.12454	0.09631	0.10972	0.11995
Moldova	NA	NA	NA	NA	NA	NA	NA	NA	NA	NA	NA	NA	0.08266	0.06764	0.0526	0.0526	0.07515	0.09018	0.0868	0.07891	0.08004	0.07703	0.08267	0.08724	0.07955	0.08531	0.09227	0.08496	0.08775	0.08113	0.07556	0.07347
Russia	NA	NA	NA	NA	NA	NA	NA	NA	NA	NA	NA	NA	16.61336	16.31434	15.33541	14.63797	13.20339	12.40913	12.717	12.69562	13.17631	13.02166	13.68622	14.33224	14.94583	14.70307	15.61977	15.62266	15.94985	13.85593	15.34983	18.44269
Tajikistan	NA	NA	NA	NA	NA	NA	NA	NA	NA	NA	NA	NA	0.07025	0.05176	0.05916	0.02984	0.04541	0.04215	0.04141	0.04326	0.04622	0.04807	0.044	0.04992	0.05136	0.05151	0.04596	0.02377	0.01549	0.00818	0.00814	0.00717
Turkmenistan	NA	NA	NA	NA	NA	NA	NA	NA	NA	NA	NA	NA	0.1479	0.1516	0.15529	0.17748	0.17748	0.17008	0.16269	0.20706	0.27361	0.35496	0.42521	0.5805	0.61267	0.63615	0.64687	0.69619	0.75051	0.71656	0.72907	0.71835
Ukraine	NA	NA	NA	NA	NA	NA	NA	NA	NA	NA	NA	NA	3.61886	4.00599	3.4431	3.10958	3.07261	2.96538	2.72874	2.88403	2.90992	2.73983	2.90992	3.16504	3.19462	3.17801	2.56209	2.98121	2.94476	1.60941	2.04821	2.35435
Uzbekistan	NA	NA	NA	NA	NA	NA	NA	NA	NA	NA	NA	NA	1.11119	1.56392	1.24739	1.37196	1.45816	1.47971	1.43302	1.44739	1.53718	1.62337	1.67006	1.69811	1.80295	1.73112	1.799	1.81333	1.88915	1.65958	1.64173	1.83312
Middle East	1.37322	1.36163	1.27208	1.49705	1.99385	2.3848	2.65129	3.06968	3.436	3.75486	3.76656	3.76872	4.20387	4.47254	4.75215	4.95993	5.52249	6.12541	6.52893	6.7532	7.14447	7.38902	8.04722	8.39318	9.03441	10.25323	10.71208	11.14197	12.1716	13.02322	13.85713	14.95824
Bahrain	0.1047	0.12564	0.13611	0.14658	0.13925	0.17171	0.18846	0.22668	0.19042	0.19485	0.21464	0.24395	0.19671	0.24477	0.23996	0.23996	0.24292	0.29469	0.30652	0.31096	0.31687	0.32908	0.34978	0.3557	0.3605	0.38579	0.40812	0.42433	0.44702	0.44955	0.45999	0.45459
Iran	0.24499	0.16368	0.2112	0.32736	0.50266	0.6336	0.56602	0.59664	0.74727	0.82946	0.88387	0.85642	0.93232	0.99087	1.18591	1.31269	1.49581	1.75648	1.92989	2.2301	2.34533	2.6172	2.9547	3.07291	3.19001	3.91498	4.05408	4.21556	4.44864	5.27318	5.39177	5.71845
Iraq	0.06491	0.02403	0.02513	0.01885	0.02094	0.02408	0.02827	0.03709	0.09244	0.09244	0.08062	0.04083	0.10575	0.09429	0.1172	0.11721	0.1198	0.11277	0.10908	0.11758	0.11647	0.10205	0.08726	0.04067	0.06471	0.05223	0.06484	0.05259	0.06772	0.04139	0.04683	0.0317
Israel	0.0052	0.00519	0.00312	0.00208	0.00208	0.00208	0.00145	0.00218	0.00147	0.00147	0.0011	0.0011	0.00079	0.0011	0.0011	0.00074	0.00073	0.00073	0.00073	0.00035	0.00037	0.00037	0.00035	0.00071	0.02752	0.02611	0.03474	0.04082	0.05162	0.10384	0.13161	0.11889
Jordan	0	0	0	0	0	0	0	0	0	0.00296	0.00481	0.00481	0.00555	0.00739	0.01035	0.01072	0.00998	0.01072	0.01035	0.01035	0.01072	0.01072	0.01146	0.0244	0.05213	0.05768	0.08319	0.09613	0.10834	0.11351	0.10131	0.03818
Kuwait	0.25547	0.1047	0.1047	0.12983	0.15077	0.14658	0.19998	0.29753	0.36752	0.43481	0.26803	0.01885	0.09687	0.2004	0.22074	0.22074	0.34387	0.34276	0.33277	0.31946	0.35496	0.31429	0.2958	0.33647	0.35866	0.44306	0.44702	0.43442	0.45747	0.41097	0.4547	0.51226
Lebanon	0	0	0	0	0	0	0	0	0	0	0	0	0	0	0	0	0	0	0	0	0	0	0	0	0	0	0	0	0	0.00147	0.00553	0
Oman	0.02932	0.03455	0.04293	0.0534	0.04921	0.05759	0.07329	0.08355	0.07653	0.10317	0.10365	0.12983	0.12239	0.14642	0.15345	0.1357	0.13385	0.16602	0.24255	0.19005	0.23183	0.23442	0.24182	0.23627	0.24736	0.33032	0.38795	0.39199	0.48701	0.53059	0.63325	0.63181
Palestinian Territories	NA	NA	NA	NA	NA	NA	NA	NA	NA	NA	NA	NA	NA	NA	NA	NA	NA	0	0	0	0	0	0	0	0	0	0	0	0	0	0	0
Qatar	0.19265	0.16454	0.19474	0.18228	0.21882	0.19998	0.20207	0.20741	0.21668	0.22518	0.28897	0.34342	0.41966	0.49916	0.49915	0.49916	0.50655	0.53761	0.54686	0.5158	0.55684	0.40487	0.41079	0.45146	0.55573	0.73369	0.7694	0.77293	0.79259	0.82786	0.85532	0.76626
Saudi Arabia	0.3497	0.5905	0.45022	0.43765	0.64914	0.74965	0.93183	0.99078	1.0759	1.10185	1.12762	1.18311	1.25714	1.3274	1.39394	1.40652	1.52854	1.67644	1.73116	1.70824	1.84172	1.98518	2.09647	2.22071	2.42851	2.56616	2.64612	2.68071	2.89755	2.82587	3.15763	3.57439
Syria	0.01635	0.00849	0.00866	0.00847	0.00866	0.00481	0.00866	0.02106	0.01733	0.03398	0.09909	0.11929	0.1223	0.1257	0.12909	0.09988	0.13657	0.15492	0.19534	0.2052	0.20724	0.18991	0.25143	0.25328	0.26252	0.21801	0.22337	0.21443	0.21586	0.26518	0.34416	0.2902
United Arab Emirates	0.10994	0.1403	0.09528	0.19055	0.25233	0.39472	0.45126	0.60675	0.65045	0.73469	0.69417	0.82713	0.94439	0.83504	0.80125	0.91661	1.00387	1.07227	1.12366	1.14511	1.16212	1.20094	1.34736	1.40061	1.48676	1.52521	1.59324	1.81805	2.19778	2.16595	2.23845	2.78801
Yemen	0	0	0	0	0	0	0	0	0	0	0	0	0	0	0	0	0	0	0	0	0	0	0	0	0	0	0	0	0	0.01386	0.03657	0.03349
Africa	0.83315	0.68804	0.93403	1.14243	1.24561	1.208	1.28458	1.39222	1.47278	1.50167	1.51526	1.68664	1.65561	1.70642	1.78388	1.87281	1.94098	1.93786	1.99061	2.02983	2.20208	2.46163	2.54445	2.76462	2.81811	3.17277	3.07111	3.16835	3.73287	3.5748	3.74887	3.95955
Algeria	0.5428	0.40828	0.65254	0.77408	0.8024	0.68912	0.71036	0.77377	0.84051	0.77922	0.80358	0.9145	0.8614	0.77301	0.81468	0.87552	0.85888	0.80237	0.82983	0.84814	0.81829	0.81351	0.81232	0.8167	0.76734	0.95381	1.01888	1.05299	1.10147	1.14449	1.14704	1.22385
Angola	0.00961	0.00925	0.01047	0.01298	0.01256	0.01361	0.01466	0.01665	0.01849	0.0159	0.01989	0.02094	0.02108	0.02071	0.01922	0.0207	0.02071	0.02108	0.02145	0.02071	0.02108	0.0196	0.02292	0.02403	0.02773	0.02341	0.02449	0.0299	0.02449	0.02485	0.0264	0.02709
Benin	0	0	0	0	0	0	0	0	0	0	0	0	0	0	0	0	0	0	0	0	0	0	0	0	0	0	0	0	0	0	0	0
Botswana	0	0	0	0	0	0	0	0	0	0	0	0	0	0	0	0	0	0	0	0	0	0	0	0	0	0	0	0	0	0	0	0
Burkina Faso	0	0	0	0	0	0	0	0	0	0	0	0	0	0	0	0	0	0	0	0	0	0	0	0	0	0	0	0	0	0	0	0
Burundi	0	0	0	0	0	0	0	0	0	0	0	0	0	0	0	0	0	0	0	0	0	0	0	0	0	0	0	0	0	0	0	0
Cameroon	0	0	0	0	0	0	0	0	0	0	0	0	0	0	0	0	0	0	0	0	0	0	0	0	0	0	0.00072	0.00072	0.00072	0.00072	0.00756	0.0054
Cape Verde	0	0	0	0	0	0	0	0	0	0	0	0	0	0	0	0	0	0	0	0	0	0	0	0	0	0	0	0	0	0	0	0
Central African Republic	0	0	0	0	0	0	0	0	0	0	0	0	0	0	0	0	0	0	0	0	0	0	0	0	0	0	0	0	0	0	0	0
Chad	0	0	0	0	0	0	0	0	0	0	0	0	0	0	0	0	0	0	0	0	0	0	0	0	0	0	0	0	0	0	0	0
Comoros	0	0	0	0	0	0	0	0	0	0	0	0	0	0	0	0	0	0	0	0	0	0	0	0	0	0	0	0	0	0	0	0
Congo (Brazzaville)	0.00042	0.00063	0.00063	0.00073	0.00073	0.00209	0.00042	0.00209	0	0	0	0	0	0	0	0	0	0	0	0	0	0	0	0	0	0.00432	0.00648	0.01045	0.01333	0.01909	0.0335	0.04142
Congo (Kinshasa)	0	0	0	0	0	0	0	0	0	0	0	0	0	0	0	0	0	0	0	0	0	0	0	0	0	0	0	0	0	0	0	0
Cote dIvoire (IvoryCoast)	0	0	0	0	0	0	0	0	0	0	0	0	0	0	0	0.00148	0.02034	0.02218	0.02958	0.04955	0.04992	0.04992	0.04737	0.04737	0.04596	0.04596	0.04596	0.05303	0.05656	0.05656	0.05303	0.05303
Djibouti	0	0	0	0	0	0	0	0	0	0	0	0	0	0	0	0	0	0	0	0	0	0	0	0	0	0	0	0	0	0	0	0
Egypt	0.03141	0.05235	0.09842	0.11873	0.14972	0.18323	0.2094	0.23222	0.25585	0.28618	0.29944	0.33609	0.3654	0.41745	0.44332	0.45959	0.49546	0.49916	0.50803	0.54242	0.67664	0.90773	0.92437	1.09519	1.16323	1.23229	1.0194	1.10337	1.5147	1.59827	1.6631	1.82808
Equatorial Guinea	0	0	0	0	0	0	0	0	0	0	0	0	0	0	0	0	0	0	0.00074	0.00074	0.00111	0.00111	0.04696	0.04807	0.0037	0.04807	0.04807	0.05513	0.05509	0.05731	0.05842	0.0599
Eritrea	NA	NA	NA	NA	NA	NA	NA	NA	NA	NA	NA	NA	NA	NA	0	0	0	0	0	0	0	0	0	0	0	0	0	0	0	0	0	0
Ethiopia	0	0	0	0	0	0	0	0	0	0	0	0	0	0	0	0	0	0	0	0	0	0	0	0	0	0	0	0	0	0	0	0
Gabon	0.00259	0.00222	0.00209	0.00555	0.00555	0.00209	0.00105	0.00429	0.0037	0.00333	0.00314	0.00372	0.0037	0.0037	0.0037	0.0037	0.0037	0.0037	0.0037	0.0037	0.00296	0.00296	0.00333	0.00333	0.0037	0.00357	0.00357	0.00286	0.00286	0.00286	0.00286	0.0025
Gambia, The	0	0	0	0	0	0	0	0	0	0	0	0	0	0	0	0	0	0	0	0	0	0	0	0	0	0	0	0	0	0	0	0
Ghana	0	0	0	0	0	0	0	0	0	0	0	0	0	0	0	0	0	0	0	0	0	0	0	0	0	0	0	0	0	0	0	0
Guinea	0	0	0	0	0	0	0	0	0	0	0	0	0	0	0	0	0	0	0	0	0	0	0	0	0	0	0	0	0	0	0	0
Guinea-Bissau	0	0	0	0	0	0	0	0	0	0	0	0	0	0	0	0	0	0	0	0	0	0	0	0	0	0	0	0	0	0	0	0
Kenya	0	0	0	0	0	0	0	0	0	0	0	0	0	0	0	0	0	0	0	0	0	0	0	0	0	0	0	0	0	0	0	0
Lesotho	0	0	0	0	0	0	0	0	0	0	0	0	0	0	0	0	0	0	0	0	0	0	0	0	0	0	0	0	0	0	0	0
Liberia	0	0	0	0	0	0	0	0	0	0	0	0	0	0	0	0	0	0	0	0	0	0	0	0	0	0	0	0	0	0	0	0
Libya	0.18846	0.11517	0.09214	0.11726	0.12773	0.14972	0.1759	0.1683	0.16417	0.1725	0.18322	0.18338	0.18218	0.176	0.18154	0.17933	0.19301	0.20151	0.20151	0.15677	0.19227	0.19929	0.20632	0.17563	0.21926	0.21	0.16912	0.19163	0.19812	0.21649	0.24653	0.15089
Madagascar	0	0	0	0	0	0	0	0	0	0	0	0	0	0	0	0	0	0	0	0	0	0	0	0	0	0	0	0	0	0	0	0
Malawi	0	0	0	0	0	0	0	0	0	0	0	0	0	0	0	0	0	0	0	0	0	0	0	0	0	0	0	0	0	0	0	0
Mali	0	0	0	0	0	0	0	0	0	0	0	0	0	0	0	0	0	0	0	0	0	0	0	0	0	0	0	0	0	0	0	0
Mauritania	0	0	0	0	0	0	0	0	0	0	0	0	0	0	0	0	0	0	0	0	0	0	0	0	0	0	0	0	0	0	0	0
Mauritius	0	0	0	0	0	0	0	0	0	0	0	0	0	0	0	0	0	0	0	0	0	0	0	0	0	0	0	0	0	0	0	0
Morocco	0.00259	0.00333	0.00314	0.00335	0.00209	0.00314	0.00314	0.0022	0.00222	0.00222	0.00209	0.00144	0.00089	0.00111	0.00111	0.00074	0.00074	0.00185	0.00185	0.00185	0.00185	0.00185	0.00185	0.00185	0.00185	0.00186	0.00223	0.00134	0.02078	0.02078	0.02078	0.00779
Mozambique	0	0	0	0	0	0	0	0	0	0	0	0	0	0	0	0	0	0	0.00222	0.00222	0.00222	0.00222	0.00222	0.00296	0.00296	0.0072	0.01441	0.0072	0.00648	0.0054	0.00288	0.01873
Namibia	NA	NA	NA	NA	NA	NA	NA	NA	NA	NA	0	0	0	0	0	0	0	0	0	0	0	0	0	0	0	0	0	0	0	0	0	0
Niger	0	0	0	0	0	0	0	0	0	0	0	0	0	0	0	0	0	0	0	0	0	0	0	0	0	0	0	0	0	0	0	0
Nigeria	0.03957	0.07957	0.05235	0.08502	0.10156	0.11308	0.12145	0.13684	0.1394	0.17378	0.13716	0.1759	0.18118	0.18672	0.16823	0.19189	0.20188	0.2163	0.21815	0.22961	0.24884	0.22961	0.23516	0.31466	0.34461	0.37318	0.39335	0.38183	0.44216	0.14985	0.18119	0.19452
Reunion	0	0	0	0	0	0	0	0	0	0	0	0	0	0	0	0	0	0	0	0	0	0	0	0	0	0	0	0	0	0	0	0
Rwanda	0	0	0	0	0	0	0	0	0	0	0	0	0	0	0	0	0	0	0	0	0	0	0	0	0	0	0	0	0	0	0	0
Saint Helena	0	0	0	0	0	0	0	0	0	0	0	0	0	0	0	0	0	0	0	0	0	0	0	0	0	0	0	0	0	0	0	0
Sao Tome and Principe	0	0	0	0	0	0	0	0	0	0	0	0	0	0	0	0	0	0	0	0	0	0	0	0	0	0	0	0	0	0	0	0
Senegal	0	0	0	0	0	0	0	0	0	0	0	0	0	0.00063	0.00127	0.00159	0.0019	0.00127	0.00127	0.00127	0.00159	0.00159	0.00159	0.00159	0.00159	0.00159	0.00159	0.00159	0.00159	0.00159	0.00063	0.00063
Seychelles	0	0	0	0	0	0	0	0	0	0	0	0	0	0	0	0	0	0	0	0	0	0	0	0	0	0	0	0	0	0	0	0
Sierra Leone	0	0	0	0	0	0	0	0	0	0	0	0	0	0	0	0	0	0	0	0	0	0	0	0	0	0	0	0	0	0	0	0
Somalia	0	0	0	0	0	0	0	0	0	0	0	0	0	0	0	0	0	0	0	0	0	0	0	0	0	0	0	0	0	0	0	0
South Africa	0	0	0	0	0	0	0	0	0	0	0	0	0.00148	0.06655	0.0721	0.07247	0.06807	0.06471	0.05361	0.05176	0.06101	0.07765	0.08504	0.0843	0.08245	0.07925	0.15129	0.143	0.14841	0.12932	0.14445	0.16498
Sudan and South Sudan	0	0	0	0	0	0	0	0	0	0	0	0	0	0	0	0	0	0	0	0	0	0	0	0	0	0	0	0	0	0	0	0
Swaziland	0	0	0	0	0	0	0	0	0	0	0	0	0	0	0	0	0	0	0	0	0	0	0	0	0	0	0	0	0	0	0	0
Tanzania	0	0	0	0	0	0	0	0	0	0	0	0	0	0	0	0	0	0	0	0	0	0	0	0	0.0044	0.01469	0.01816	0.01909	0.02017	0.0237	0.0281	0.03098
Togo	0	0	0	0	0	0	0	0	0	0	0	0	0	0	0	0	0	0	0	0	0	0	0	0	0	0	0	0	0	0	0	0
Tunisia	0.01571	0.01724	0.02225	0.02472	0.04326	0.05191	0.0482	0.05585	0.04845	0.06854	0.06674	0.05068	0.03832	0.06054	0.07871	0.06579	0.07629	0.10374	0.11867	0.1211	0.12432	0.1546	0.155	0.14895	0.14935	0.17357	0.15339	0.11423	0.12594	0.12352	0.1324	0.14975
Uganda	0	0	0	0	0	0	0	0	0	0	0	0	0	0	0	0	0	0	0	0	0	0	0	0	0	0	0	0	0	0	0	0
Western Sahara	0	0	0	0	0	0	0	0	0	0	0	0	0	0	0	0	0	0	0	0	0	0	0	0	0	0	0	0	0	0	0	0
Zambia	0	0	0	0	0	0	0	0	0	0	0	0	0	0	0	0	0	0	0	0	0	0	0	0	0	0	0	0	0	0	0	0
Zimbabwe	0	0	0	0	0	0	0	0	0	0	0	0	0	0	0	0	0	0	0	0	0	0	0	0	0	0	0	0	0	0	0	0
Asia & Oceania	2.77078	2.90126	2.95689	3.22332	3.83011	4.2699	4.54838	4.87696	5.30162	5.58749	6.21214	6.66291	6.96343	7.39888	8.01236	8.47574	9.15061	9.60147	9.72263	10.4719	10.95893	11.1129	12.08651	12.63629	13.28781	14.44208	16.01849	17.60521	18.24108	19.17218	21.4485	23.01271
Afghanistan	0.00209	0.00314	0.00524	0.00524	0.00524	0	0	0.02255	0.07321	0.07149	0.07015	0.01152	0.01109	0.01109	0.01109	0.00739	0.0085	0.0085	0.0085	0.0085	0.0085	0.00185	0.00185	0.00074	0.00074	0.00074	0.00074	0.00148	0.00185	0.00111	0.00518	0.00518
American Samoa	0	0	0	0	0	0	0	0	0	0	0	0	0	0	0	0	0	0	0	0	0	0	0	0	0	0	0	0	0	0	0	0
Australia	0.33885	0.38726	0.42902	0.4346	0.46408	0.49544	0.54128	0.55488	0.57886	0.59451	0.6525	0.61028	0.63208	0.65789	0.68776	0.73808	0.74077	0.74599	0.78171	0.8092	0.84955	0.89577	0.94626	0.97736	1.04407	1.18708	1.20737	1.19281	1.21413	1.22653	1.28305	1.42265
Bangladesh	0.04705	0.05616	0.06117	0.06455	0.0894	0.0941	0.10633	0.12356	0.14123	0.15452	0.15244	0.16279	0.19407	0.2134	0.23226	0.2548	0.26379	0.26379	0.2835	0.31289	0.33536	0.35611	0.38376	0.43208	0.47003	0.50726	0.55509	0.58951	0.64857	0.71017	0.7214	0.72865
Bhutan	0	0	0	0	0	0	0	0	0	0	0	0	0	0	0	0	0	0	0	0	0	0	0	0	0	0	0	0	0	0	0	0
Brunei	0.07284	0.07527	0.08498	0.06313	0.05342	0.06434	0.04006	0.06942	0.05873	0.06904	0.05584	0.01731	0.04039	0.03301	0.02853	0.03954	0.03179	0.03586	0.03097	0.03845	0.04067	0.04992	0.06175	0.06397	0.07395	0.09054	0.15373	0.15801	0.16182	0.09594	0.11443	0.11636
Burma (Myanmar)	0.01152	0.01256	0.01665	0.01958	0.02408	0.02932	0.03979	0.04209	0.03845	0.0403	0.03979	0.03692	0.03635	0.04094	0.05323	0.06105	0.05956	0.05621	0.06551	0.05146	0.05872	0.06188	0.08189	0.09343	0.09938	0.1541	0.13474	0.15335	0.1433	0.12097	0.1206	0.12432
Cambodia	0	0	0	0	0	0	0	0	0	0	0	0	0	0	0	0	0	0	0	0	0	0	0	0	0	0	0	0	0	0	0	0
China	0.58126	0.51795	0.43853	0.49608	0.50414	0.52601	0.55708	0.56894	0.57929	0.58126	0.56902	0.58851	0.59481	0.62263	0.656	0.67573	0.75067	0.8103	0.84212	0.90911	0.94298	1.01808	1.10904	1.19488	1.41107	1.73558	2.09114	2.61207	2.85913	3.27841	3.95312	4.8501
Cook Islands	0	0	0	0	0	0	0	0	0	0	0	0	0	0	0	0	0	0	0	0	0	0	0	0	0	0	0	0	0	0	0	0
Fiji	0	0	0	0	0	0	0	0	0	0	0	0	0	0	0	0	0	0	0	0	0	0	0	0	0	0	0	0	0	0	0	0
French Polynesia	0	0	0	0	0	0	0	0	0	0	0	0	0	0	0	0	0	0	0	0	0	0	0	0	0	0	0	0	0	0	0	0
Guam	0	0	0	0	0	0	0	0	0	0	0	0	0	0	0	0	0	0	0	0	0	0	0	0	0	0	0	0	0	0	0	0
Hawaiian Trade Zone	0	0	0	0	0	0	0	NA	NA	NA	NA	NA	NA	NA	NA	NA	NA	NA	NA	NA	NA	NA	NA	NA	NA	NA	NA	NA	NA	NA	NA	NA
Hong Kong	0	0	0	0	0	0	0	0	0	0	0.01427	0.01539	0.01726	0.0182	0.01965	0.02083	0.06892	0.10885	0.10144	0.11198	0.09976	0.10068	0.09569	0.07107	0.09332	0.11059	0.10801	0.0969	0.12103	0.11552	0.14481	0.11509
India	0.0587	0.07366	0.09995	0.11859	0.1269	0.1516	0.20718	0.26093	0.35681	0.36278	0.45925	0.5168	0.54874	0.61215	0.68328	0.72231	0.72009	0.74127	0.78655	0.77778	0.8216	0.88003	0.95671	1.0017	1.13012	1.31872	1.42329	1.51759	1.5741	1.95607	2.36629	2.34867
Indonesia	0.27309	0.2727	0.25911	0.34768	0.40595	0.48014	0.51782	0.53569	0.56871	0.63669	0.69264	0.84142	0.87638	0.92615	1.05201	1.15673	1.2391	1.22678	1.07127	1.22563	1.04394	0.79104	0.86879	0.87765	0.73599	0.78372	1.08166	1.22794	1.30223	1.46544	1.5228	1.44658
Japan	0.96711	0.99027	1.00267	1.07035	1.4368	1.53658	1.56422	1.61552	1.69405	1.81063	2.14168	2.29704	2.29898	2.34134	2.4643	2.54414	2.66568	2.73527	2.8254	2.9734	3.07709	3.06203	3.2734	3.2734	3.29616	3.28425	3.6291	3.95798	3.87258	3.85759	4.06307	4.60557
Kiribati	0	0	0	0	0	0	0	0	0	0	0	0	0	0	0	0	0	0	0	0	0	0	0	0	0	0	0	0	0	0	0	0
Korea, North	0	0	0	0	0	0	0	0	0	0	0	0	0	0	0	0	0	0	0	0	0	0	0	0	0	0	0	0	0	0	0	0
Korea, South	0	0	0	0	0	0	0.00281	0.08358	0.10798	0.10451	0.11973	0.13863	0.18174	0.22702	0.3022	0.36541	0.48275	0.58719	0.54929	0.66887	0.74815	0.80434	0.92167	0.96035	1.13218	1.20437	1.28741	1.3908	1.41469	1.35992	1.70262	1.81119
Laos	0	0	0	0	0	0	0	0	0	0	0	0	0	0	0	0	0	0	0	0	0	0	0	0	0	0	0	0	0	0	0	0
Macau	0	0	0	0	0	0	0	0	0	0	0	0	0	0	0	0	0	0	0	0	0	0	0	0	0	0	0	0	0	0	0	0
Malaysia	0.05841	0.06467	0.05528	0.08031	0.15854	0.23468	0.291	0.27634	0.30167	0.31015	0.32855	0.39947	0.40468	0.48194	0.50723	0.51057	0.59238	0.62065	0.64742	0.68795	0.8631	0.94305	1.03528	1.01929	0.92595	0.96239	0.98991	1.11932	1.19109	1.15799	1.21303	1.13866
Maldives	0	0	0	0	0	0	0	0	0	0	0	0	0	0	0	0	0	0	0	0	0	0	0	0	0	0	0	0	0	0	0	0
Mongolia	0	0	0	0	0	0	0	0	0	0	0	0	0	0	0	0	0	0	0	0	0	0	0	0	0	0	0	0	0	0	0	0
Nauru	0	0	0	0	0	0	0	0	0	0	0	0	0	0	0	0	0	0	0	0	0	0	0	0	0	0	0	0	0	0	0	0
Nepal	0	0	0	0	0	0	0	0	0	0	0	0	0	0	0	0	0	0	0	0	0	0	0	0	0	0	0	0	0	0	0	0
New Caledonia	0	0	0	0	0	0	0	0	0	0	0	0	0	0	0	0	0	0	0	0	0	0	0	0	0	0	0	0	0	0	0	0
New Zealand	0.03594	0.04402	0.07633	0.08133	0.10433	0.13499	0.15935	0.15375	0.16832	0.17227	0.17289	0.18455	0.19832	0.17937	0.18019	0.17199	0.19433	0.20893	0.18391	0.21052	0.21192	0.23765	0.22293	0.1706	0.14969	0.13663	0.15492	0.15815	0.14722	0.14987	0.15958	0.15433
Niue	0	0	0	0	0	0	0	0	0	0	0	0	0	0	0	0	0	0	0	0	0	0	0	0	0	0	0	0	0	0	0	0
Pakistan	0.2789	0.30771	0.34515	0.33345	0.33064	0.34091	0.36613	0.39153	0.41527	0.44364	0.45019	0.49876	0.51437	0.54452	0.5858	0.60328	0.65045	0.65243	0.66298	0.73225	0.79921	0.72334	0.70439	0.77425	0.8399	0.94304	1.10593	1.12675	1.16349	1.18523	1.2134	1.1987
Papua New Guinea	0	0	0	0	0	0	0	0	0	0	0	0	0.00222	0.00296	0.00185	0.0037	0.00481	0.00407	0.00407	0.00407	0.00407	0.00407	0.00407	0.00518	0.00518	0.0037	0.00518	0.00503	0.00481	0.0037	0.00407	0.0037
Philippines	0	0	0	0	0	0	0	0	0	0	0	0	0	0	0	0.00034	0.00035	0.00035	0.00035	0.00035	0.00035	0.0069	0.07254	0.10518	0.10518	0.10528	0.07987	0.10528	0.10673	0.11436	0.10383	0.10528
Samoa	0	0	0	0	0	0	0	0	0	0	0	0	0	0	0	0	0	0	0	0	0	0	0	0	0	0	0	0	0	0	0	0
Singapore	0	0	0	0	0	0	0	0	0	0	0	0	0.04068	0.05546	0.05546	0.05546	0.05546	0.05546	0.05546	0.05546	0.05546	0.04363	0.04326	0.19671	0.2444	0.2381	0.2381	0.3105	0.31663	0.29033	0.30258	0.31627
Solomon Islands	0	0	0	0	0	0	0	0	0	0	0	0	0	0	0	0	0	0	0	0	0	0	0	0	0	0	0	0	0	0	0	0
Sri Lanka	0	0	0	0	0	0	0	0	0	0	0	0	0	0	0	0	0	0	0	0	0	0	0	0	0	0	0	0	0	0	0	0
Taiwan	0.04502	0.05553	0.0335	0.04921	0.05444	0.05235	0.04188	0.04523	0.02514	0.05251	0.08376	0.105	0.11466	0.11124	0.14055	0.1508	0.17232	0.20568	0.24107	0.24328	0.26809	0.26692	0.31726	0.32428	0.38945	0.40623	0.41482	0.44447	0.45501	0.47218	0.59159	0.63256
Thailand	0	0.04	0.047	0.0569	0.07	0.128	0.112	0.1315	0.19281	0.18211	0.208	0.236	0.249	0.31042	0.34184	0.36763	0.41852	0.52548	0.55549	0.61415	0.68833	0.81806	0.90328	0.9954	1.03129	1.12341	1.14894	1.2214	1.2873	1.35147	1.55538	1.60679
Timor-Leste (East Timor)	NA	NA	NA	NA	NA	NA	NA	NA	NA	NA	NA	NA	NA	NA	NA	NA	NA	NA	NA	NA	NA	NA	NA	0	0	0	0	0	0	0	0	0
Tonga	0	0	0	0	0	0	0	0	0	0	0	0	0	0	0	0	0	0	0	0	0	0	0	0	0	0	0	0	0	0	0	0
U.S. Pacific Islands	0	0	0	0	0	0	0	0	0	0	0	0	0	0	0	0	0	0	0	0	0	0	0	0	0	0	0	0	0	0	0	0
Vanuatu	0	0	0	0	0	0	0	0	0	0	0	0	0	0	0	0	0	0	0	0	0	0	0	0	0	0	0	0	0	0	0	0
Vietnam	0	0.00036	0.00232	0.00232	0.00218	0.00145	0.00145	0.00145	0.00109	0.00109	0.00145	0.00253	0.00761	0.00915	0.00915	0.02597	0.03037	0.00841	0.02561	0.03659	0.04207	0.04756	0.08269	0.09878	0.10976	0.14635	0.20854	0.21586	0.25537	0.2594	0.30769	0.28208
Wake Island	0	0	0	0	0	0	0	0	0	0	0	0	0	0	0	0	0	0	0	0	0	0	0	0	0	0	0	0	0	0	0	0
World	53.86478	53.89472	54.05323	55.15048	60.84457	63.37217	64.22482	67.5605	71.01212	74.23025	75.36644	76.89779	77.04088	79.04077	78.88368	81.13642	83.24544	83.51061	84.15292	86.36107	89.80726	90.28242	94.07396	96.96238	100.3972	103.22489	106.10592	109.27488	112.78884	108.62158	117.10388	123.31887
