# Supplementary material
Source: MDPI journal article supplement (https://www.mdpi.com/1099-4300/15/12/5565)
Supplement: s2 [file s2 › Sources/data/Petroleum Production.csv]

Region	1980	1981	1982	1983	1984	1985	1986	1987	1988	1989	1990	1991	1992	1993	1994	1995	1996	1997	1998	1999	2000	2001	2002	2003	2004	2005	2006	2007	2008	2009	2010	2011	2012
Bermuda	0	0	0	0	0	0	0	0	0	0	0	0	0	0	0	0	0	0	0	0	0	0	0	0	0	0	0	0	0	0	0	0	0
Canada	1816.231	1662.74	1639.442	1691.612	1809.707	1848.344	1862.6219	1960.25673	2056.74362	2030.73459	2040.12428	2040.98815	2125.81493	2250.20475	2340.70405	2453.1321	2500.96536	2626.6722	2700.45618	2632.96211	2753.14455	2816.36185	2953.69968	3113.64521	3139.35779	3096.3287	3292.5916	3448.56255	3343.57681	3318.82898	3441.73001	3597.33277	3867.95603
Greenland	0	0	0	0	0	0	0	0	0	0	0	0	0	0	0	0	0	0	0	0	0	0	0	0	0	0	0	0	0	0	0	0	0
Mexico	2129	2554	3003	2954	3049.53766	3027.27825	2802.53733	2897.76744	2888.94511	2913.3321	2991.70622	3149.02361	3133.8483	3139.9889	3158.63464	3075.21086	3293.46875	3421.93305	3501.56659	3354.28521	3460.0852	3570.03017	3593.34925	3807.67752	3847.93316	3784.06672	3711.89798	3500.28969	3184.16393	3000.79117	2978.59944	2959.98935	2936.00884
Saint Pierre and Miquelon	0	0	0	0	0	0	0	0	0	0	0	0	0	0	0	0	0	0	0	0	0	0	0	0	0	0	0	0	0	0	0	0	0
United States	10809	10738.69863	10782.60822	10787.76164	11107.43989	11192.37808	10905.24658	10647.61881	10473.08197	9880.41096	9677.54536	9882.71	9768.165	9601.95046	9412.8656	9399.89315	9444.54918	9460.93973	9278.00548	8993.4137	9057.77596	8957.00822	8998.43288	8760.66027	8716.49454	8329.16438	8317.00548	8469.36712	8564.23224	9133.12877	9692.43288	10135.55068	11126.76231
Antarctica	0	0	0	0	0	0	0	0	0	0	0	0	0	0	0	0	0	0	0	0	0	0	0	0	0	0	0	0	0	0	0	0	0
Antigua and Barbuda	0	0	0	0	0	0	0	0	0	0	0	0	0	0	0	0	0	0	0	0	0	0	0	0	0	0	0	0	0	0	0	0	0
Argentina	508	513	507	504	498	485	471.05425	471.52318	492.12401	496.3969	520.80672	529.19218	597.28541	646.67954	712.92447	774.19884	821.32148	905.07695	916.88787	870.0217	831.74536	876.07288	865.5894	865.75903	825.08217	797.08576	802.28451	781.22503	801.04257	801.65766	790.50851	763.68127	735.20285
Aruba	NA	NA	NA	NA	NA	NA	0	0	0	0	-0.06823	0.03858	-0.02753	-0.02753	0	0	0	0	0	0	2.35606	2.36251	2.36251	2.36251	2.35606	2.35094	2.23502	2.47712	2.46486	2.81073	2.81073	2.81073	2.81073
Bahamas, The	0	0	0	0	0	0	0	0	0	0	0	0	0	0	0	0	0	0	0	0	0	0	0	0	0	0	0	0	0	0	0	0	0
Barbados	0	0	1	1	2	2	1.85393	1.21972	1.15633	0.95179	1.09747	1.04947	1.23329	1.13191	1.08796	1.12064	1.18265	0.81214	1.60741	1.94141	1.53	1.271	1	1	1.00223	1	1.03372	1.10849	1.101	0.766	1.001	1.001	1.001
Belize	0	0	0	0	0	0	0	0	0	0	0	0	0	0	0	0	0	0	0	0	0	0	0	0	0	0	2.25731	2.9998	3.51066	3.9895	4.25168	4	3.23934
Bolivia	32	26	30	28	27	26	23.33858	23.57221	24.45063	25.46244	25.97264	25.99185	28.49921	30.25164	31.37783	35.36445	37.92114	38.51045	44.31708	41.80865	40.43515	44.85325	47.22013	42.92015	61.33813	62.66462	61.31639	61.82555	51.5574	45.9594	47.87652	49.27474	54.17799
Brazil	244.5	283.06	348.19	459.51	614.37	734.35	739.97058	767.53431	750.79499	789.5309	821.11709	838.44905	823.52195	839.39919	957.17092	989.7745	1106.53982	1172.1578	1282.36318	1427.64817	1534.1069	1573.48551	1757.89225	1846.89884	1839.48343	2037.52243	2169.46364	2283.50454	2431.46922	2561.71301	2712.47255	2685.15441	2651.93882
Cayman Islands	0	0	0	0	0	0	0	0	0	0	0	0	0	0	0	0	0	0	0	0	0	0	0	0	0	0	0	0	0	0	0	0	0
Chile	46	52	54	50	50	47.6	44.20078	43.21763	37.71346	35.68429	35.31714	31.71697	29.37143	30.19462	29.09515	26.45705	25.70661	18.8471	18.43399	17.93834	16.36189	17.17186	17.14158	16.93329	15.75985	15.32121	13.03867	10.67046	12.12632	12.97693	18.42176	18.36149	17.33709
Colombia	134	133	149	158	174	182	315.15478	396.01934	387.25101	416.66854	453.99815	429.77561	444.81074	467.31953	462.41693	597.05413	642.05354	665.34962	746.01957	830.19399	704.116	636.82415	588.27609	554.6763	541.95644	540.6865	548.35198	546.10839	603.67398	690.2767	805.88982	938.54322	969.15952
Costa Rica	0	0	0	0	0	0	-0.17203	-0.14961	-0.10851	-0.22843	-0.17458	-0.15723	-0.22425	-0.25548	-0.13098	-0.32976	-0.29308	-0.31206	-0.02694	0	-0.00013	0.07138	0.47779	0.72921	1.02257	1.87715	1.85578	2.63658	2.30845	1.22606	0.39068	0.29068	0.29068
Cuba	6	9	11	13	16	19	17.05005	16.87306	13.28355	12.83403	12.21765	11.95975	16.46466	19.41023	24.27039	25.99775	31.21102	33.17877	34.75753	40.82032	43.87799	51.46238	48.54399	56.27552	59.2131	53.45519	52.24967	51.63393	50.69913	46.34204	51.52764	53.72764	50.80414
Dominica	0	0	0	0	0	0	0	0	0	0	0	0	0	0	0	0	0	0	0	0	0	0	0	0	0	0	0	0	0	0	0	0	0
Dominican Republic	1	1	1	1	1	1	-0.15494	0.04351	0.03715	0.09047	-0.11591	-0.18446	-0.89136	-0.5117	-0.43783	-0.96174	-0.86759	-0.95509	-0.95518	-0.37135	-0.15427	-0.09473	-0.06702	0.01195	-0.44867	-0.38925	-0.30857	-0.39215	-0.26603	0.03457	0.0611	0.0611	0.0611
Ecuador	207	214	214	240	261	284	294.55074	175.30169	303.46003	280.5218	286.47828	300.64211	323.94067	348.69134	370.0085	395.85926	397.66143	389.34998	376.68899	374.04179	396.31137	412.51131	392.71859	411.34177	529.00582	532.7553	536.37993	511.42215	505.26878	485.70685	487.308	500.60436	504.50844
El Salvador	0	0	0	0	0	0	0.00264	-0.04769	-0.05528	0.01508	-0.06151	-0.11051	-0.04311	-0.0171	0.03199	-0.05459	-0.14135	-0.31024	-0.49988	-0.58057	-0.59126	-0.6693	-0.27777	-0.10589	-0.20429	0.96612	5.30788	4.29737	4.18243	1.77155	-0.51666	-0.51366	-0.51366
Falkland Islands (Islas Malvinas)	0	0	0	0	0	0	0	0	0	0	0	0	0	0	0	0	0	0	0	0	0	0	0	0	0	0	0	0	0	0	0	0	0
French Guiana	0	0	0	0	0	0	0	0	0	0	0	0	0	0	0	0	0	0	0	0	0	0	0	0	0	0	0	0	0	0	0	0	0
Grenada	0	0	0	0	0	0	0	0	0	0	0	0	0	0	0	0	0	0	0	0	0	0	0	0	0	0	0	0	0	0	0	0	0
Guadeloupe	0	0	0	0	0	0	0	0	0	0	0	0	0	0	0	0	0	0	0	0	0	0	0	0	0	0	0	0	0	0	0	0	0
Guatemala	5	5	6	7	5	3	5.06185	4.02652	3.02382	4.02924	3.90803	4.43332	4.57746	6.83251	8.14947	9.38714	12.67049	15.52828	23.66797	23.11035	20.50404	20.94088	17.90308	21.99452	19.81148	17.17389	21.46499	18.74113	18.44183	16.54395	16.07696	15.02715	14.01715
Guyana	0	0	0	0	0	0	0	0	0	0	0	0	0	0	0	0	0	0	0	0	0	0	0	0	0	0	0	0	0	0	0	0	0
Haiti	0	0	0	0	0	0	0	0	0	0	0	0	0	0	0	0	0	0	0	0	0	0	0	0	0	0	0	0	0	0	0	0	0
Honduras	0	0	0	0	0	0	-0.01458	-0.00804	-0.01308	-0.06146	-0.14273	-0.1406	-0.09501	0	0	0	0	0	0	0	0	0	0	0	0	0.001	0.02	0.02	0.02	0.02	0.02	0.02	0.02
Jamaica	0	0	0	0	0	0	-0.65598	-0.41034	-0.37482	-0.46555	-0.58362	-0.37701	-0.57096	-0.19817	-0.32807	-0.49304	-0.42789	-0.4202	-0.41484	-0.22539	-0.55761	-0.411	1.30666	2.05014	1.50699	1.84236	4.58483	4.34633	5.70469	5.97811	1.11961	2.11961	2.11961
Martinique	0	0	0	0	0	0	0.02918	0.02652	0.02535	0.04889	0.01677	0.01855	0.01816	-0.13517	-0.09217	-0.08052	-0.07887	-0.07835	-0.0765	-0.0765	-0.07508	-0.06992	-0.06383	-0.08246	-0.08994	-0.0785	-0.09705	-0.08079	-0.08815	-0.24923	-0.24923	-0.24923	-0.24923
Montserrat	0	0	0	0	0	0	0	0	0	0	0	0	0	0	0	0	0	0	0	0	0	0	0	0	0	0	0	0	0	0	0	0	0
Netherlands Antilles	4	4	4	4	4	4	-0.04836	0.68193	0.4485	-0.16795	-0.52805	-1.20941	-1.67435	-1.51979	-1.5017	-1.41023	-1.39489	-1.45815	-1.51524	-0.04502	-0.75737	-2.16916	-1.00718	-0.26368	-0.02917	-0.58477	-0.73755	0.53109	0.66101	-0.41157	1.49587	1.49587	1.49587
Nicaragua	0	0	0	0	0	0	-0.1612	-0.16503	-0.16053	-0.16566	-0.16926	-0.1283	-0.12946	-0.08209	-0.07825	-0.07669	0.01293	-0.14147	-0.48178	-0.44652	-0.38638	-0.49056	-0.394	-0.37958	-0.43606	-0.367	-0.41205	-0.37737	0.57379	0.61124	-0.3535	-0.1535	-0.1535
Panama	1	1	1	1	1	0	-0.43438	-0.45091	-0.15414	-0.13193	-0.14576	-0.62936	-1.24584	-1.19028	-0.58001	0.00989	-1.25158	-0.57986	-0.82758	-1.38141	-1.30457	-2.19515	-0.13995	0	0	0	0	0	0	0	0	0	0
Paraguay	0	0	0	0	0	0	0.06416	0.06781	0.07196	0.07714	0.10436	0.07407	0.00008	0.0517	0.04531	-0.02366	-0.02031	-0.03267	-0.02226	-0.02654	-0.00267	-0.00243	-0.00925	-0.00574	0.09053	0.62697	0.8	1.1	1.7	2.2	2.3	2.2	2
Peru	200	199	201	174	187	193	176.78192	162.14435	139.58026	128.74227	127.97529	113.79719	115.16208	125.88575	127.50041	129.8181	120.50372	119.33792	115.77884	107.19759	99.56547	95.99972	96.64867	92.01186	93.77919	112.14024	119.04757	115.93784	121.78463	148.86425	163.80483	159.76794	160.42798
Puerto Rico	0	-1	-2	-1	2.4	-1	-1.01673	1.03909	1.0457	0.84358	1.8025	2.82655	1.53448	4.67653	3.31615	1.68011	1.82465	1.62863	1.37951	0.89397	0.45721	-0.13211	0.43608	0.72181	1.35395	1.34917	0.08543	1.3276	0.66277	0.53813	0	0.8536	0.6737
Saint Kitts and Nevis	0	0	0	0	0	0	0	0	0	0	0	0	0	0	0	0	0	0	0	0	0	0	0	0	0	0	0	0	0	0	0	0	0
Saint Lucia	0	0	0	0	0	0	0	0	0	0	0	0	0	0	0	0	0	0	0	0	0	0	0	0	0	0	0	0	0	0	0	0	0
Saint Vincent/Grenadines	0	0	0	0	0	0	0	0	0	0	0	0	0	0	0	0	0	0	0	0	0	0	0	0	0	0	0	0	0	0	0	0	0
Suriname	0	0	0	0	0	1	2	2	3	4	3.9	3.5	5	5	6	7	7.49727	5	7	10	9.58533	9.49617	9.49617	9.46166	9.46111	9.43937	11.01819	12.96046	15.26682	15.41897	15.4416	15.4416	15.27493
Trinidad and Tobago	213.9	243	182.8	163	173	178	166.41257	155.8284	155.90959	153.13521	148.91012	152.10907	140.00083	140.03942	137.37047	138.03412	136.9513	130.70942	129.51637	138.932	140.10014	132.72897	144.11158	161.17101	151.03687	170.75018	179.41381	156.51853	156.63383	153.36072	145.79335	138.43344	119.31464
Turks and Caicos Islands	0	0	0	0	0	0	0	0	0	0	0	0	0	0	0	0	0	0	0	0	0	0	0	0	0	0	0	0	0	0	0	0	0
Uruguay	0	0	0	0	0	0	0.15302	0.24685	0.11182	0.08454	0.16485	0.27341	0.34317	0.1684	0.25	-0.00079	0.16605	0.46425	0.46641	0.50147	0.36619	0.51138	0.43503	0.51349	0.93574	0.97608	1.03742	0.96333	1.00084	0.76474	1.08286	1.18286	1.18286
Venezuela	2246	2177	1973	1874	1872	1757	1890.19818	1857.25159	2008.21083	2024.73204	2262.17979	2509.84308	2519.64924	2634.2971	2796.29424	2982.23845	3175.43852	3517.55363	3408.79676	3109.22194	3460.7588	3333.98838	2924.20405	2581.42877	2855.16767	2866.93064	2746.53371	2681.9924	2655.69603	2509.74521	2404.99578	2489.24235	2489.24235
Virgin Islands, U.S.	0	0	0	-1	-0.6	0.2	-5.45328	-4.11259	-2.99331	-4.49359	-0.78606	0.61679	0.38517	0.13236	8.40878	10.11069	11.89439	12.26959	13.65247	12.6063	14.68287	14.3349	14.65224	17.11124	17.619	17.5788	17.62282	16.86836	16.64497	16.76659	14.88036	14.88036	14.88036
Virgin Islands, British	0	0	0	0	0	0	0	0	0	0	0	0	0	0	0	0	0	0	0	0	0	0	0	0	0	0	0	0	0	0	0	0	0
Albania	44	44	64	75	55	55	54.61346	53.62027	43.57588	46.73581	29.71371	18.62471	10.33765	11.11899	11.40015	9.89735	9.64646	9.34538	6.41554	5.56864	5.6601	5.99404	6.32234	6.72214	6.69884	6.98491	7.81407	6.50125	6.03628	5.39109	10.87307	15.54431	16.8653
Austria	30.3	28	29	28	27	25	25.17439	24.37353	26.76534	27.26606	26.61214	29.81708	27.44872	26.06411	26.29303	27.66064	26.66319	24.0133	25.70405	23.22929	24.74692	25.28533	26.89388	25.90854	26.46189	24.91999	26.91867	27.68311	27.35455	28.19153	28.71441	30.39195	29.48281
Belgium	8	8	9	10	11	11	6.06952	5.55078	8.19025	10.61705	10.57794	9.12369	10.38858	9.79499	12.69104	12.12327	11.45889	10.96599	10.91118	11.79916	10.21812	12.3046	13.06085	11.06035	10.68759	8.69059	11.70884	11.2241	8.5207	12.60347	12.70007	10.53035	10.53035
Bosnia and Herzegovina	NA	NA	NA	NA	NA	NA	NA	NA	NA	NA	NA	NA	0	0	0	0	0	0	0	0	0	0	0	0	0	0	-0.07291	-0.05931	-0.09745	-0.0936	-0.03195	-0.03195	-0.03195
Bulgaria	3	3	3	3	4	6	-0.17701	0.09789	-1.53749	4.72227	3.49063	0.03394	0.40748	0.59237	0.22167	1.05968	1.61687	0.85563	2.23854	2.63432	1.96207	1.16243	2.64813	3.12806	3.66126	3.35651	3.37787	3.12498	3.51701	3.3409	3.58363	3.38363	3.38363
Croatia	NA	NA	NA	NA	NA	NA	NA	NA	NA	NA	NA	NA	40.7932	42.56105	47.80146	41.75348	37.87669	38.56818	40.35658	33.43373	33.41747	32.4094	31.22241	31.33015	28.77786	27.69091	25.62869	23.83584	22.09883	24.4447	23.82472	21.89321	20.07449
Cyprus	0	0	0	0	0	0	0.01948	-0.01473	-0.01127	0.02266	0.04659	-0.03449	-0.12105	-0.20818	-0.1362	-0.16718	0.05352	-0.28656	-0.31733	-0.36819	-0.36403	-0.35684	-0.25876	-0.19136	-0.07285	0.02	0.02	0.02	0.2	0.2	0.1	0.1	0.00847
Czech Republic	NA	NA	NA	NA	NA	NA	NA	NA	NA	NA	NA	NA	NA	2.49684	2.78653	3.90668	5.28298	4.52385	4.58905	9.58684	9.36243	9.24546	12.47535	15.34589	17.16676	17.54448	15.83179	13.74412	10.90856	10.38968	10.28301	13.01232	10.00915
Denmark	5.2825	14.7459	34.1658	44.3428	45.86096	58.07495	76.18792	96.88202	98.85976	116.94032	121.12745	143.63123	163.42971	174.33727	185.61003	187.30654	210.06396	233.25498	240.62451	302.63873	365.17927	348.98958	373.43236	378.40922	392.7449	380.78402	345.73955	315.29015	290.39414	264.30807	249.46475	226.28422	207.38405
Faroe Islands	0	0	0	0	0	0	0	0	0	0	0	0	0	0	0	0	0	0	0	0	0	0	0	0	0	0	0	0	0	0	0	0	0
Finland	-0.4318	0.8412	2.0142	3.0672	4.18552	4.22003	4.76423	5.38922	5.44508	5.23831	5.71853	6.57835	7.4276	7.53177	8.91368	9.24073	8.94997	8.35945	9.11999	8.9777	8.27969	7.8004	9.01284	9.28445	9.15518	9.17124	10.18874	9.78874	8.53291	9.54122	15.30335	14.2309	13.5309
Former Czechoslovakia	2.08975	2.09	2.1	2.1	-4.48773	-4.27101	-2.71614	-2.20843	-0.84436	-0.17926	0.84412	2.14145	2.23293	NA	NA	NA	NA	NA	NA	NA	NA	NA	NA	NA	NA	NA	NA	NA	NA	NA	NA	NA	NA
Former Serbia and Montenegro	NA	NA	NA	NA	NA	NA	NA	NA	NA	NA	NA	NA	22.684	22.57744	26.60528	24.87931	24.79993	22.58078	21.38143	20.93529	18.74295	18.1593	17.16277	16.55189	16.41191	15.58606	NA	NA	NA	NA	NA	NA	NA
Former Yugoslavia	88	88	89	87	84	90	87.11762	89.78293	87.39078	76.84745	71.75255	67.70763	NA	NA	NA	NA	NA	NA	NA	NA	NA	NA	NA	NA	NA	NA	NA	NA	NA	NA	NA	NA	NA
France	83	92	86	89	93	106	107.18935	111.38053	119.31637	116.16082	111.52665	112.95266	114.07538	112.4889	115.78538	110.01077	105.20895	97.28428	89.21636	92.58357	93.20904	90.13303	86.21381	90.23643	89.10493	84.25015	88.91645	74.63232	73.07799	76.31161	76.5425	75.88213	72.30336
Germany	NA	NA	NA	NA	NA	NA	NA	NA	NA	NA	NA	148.01887	131.71644	136.88703	127.04025	125.56914	125.60148	125.1802	128.99952	129.6182	134.96042	129.52011	135.70219	139.07225	124.67114	153.7431	165.64423	120.36124	124.89943	133.06079	125.00158	141.00015	144.50771
Germany (Offshore)	0	0	0	0	0	0	0	0	0	0	0	0	0	0	12	12	12	9	10	12	16	17.111	18.6137	21.00274	22.6694	23.7589	26.5863	25.2411	20.81967	23.72877	20.88219	24.08767	25
Germany, East	-6.216	-6.616	-7	-5.598	3.89993	0.60049	1.08007	1.81014	2.23889	2.53431	3.95705	NA	NA	NA	NA	NA	NA	NA	NA	NA	NA	NA	NA	NA	NA	NA	NA	NA	NA	NA	NA	NA	NA
Germany, West	124.431	108.468	116.652	129.087	139.973	148.213	147.583	143.369	154.64378	149.22541	150.9715	NA	NA	NA	NA	NA	NA	NA	NA	NA	NA	NA	NA	NA	NA	NA	NA	NA	NA	NA	NA	NA	NA
Gibraltar	0	0	0	0	0	0	0	0	0	0	0	0	0	0	0	0	0	0	0	0	0	0	0	0	0	0	0	0	0	0	0	0	0
Greece	1	10	24	28.5	31	30	24.12287	24.63208	24.40281	20.627	18.88087	19.06196	19.8002	15.41604	14.42113	12.17144	10.7052	11.63871	9.64599	3.29279	7.65055	8.01615	6.6362	5.41931	5.23814	5.74675	6.62979	5.13801	6.00839	6.41675	8.47986	7.57805	7.49677
Hungary	58	58	62	61	62.6117	63.20489	63.67566	60.20391	64.93717	53.51736	57.70308	49.13884	48.65675	47.03622	62.9286	60.39753	62.70028	68.08731	53.57011	49.62203	49.41499	48.74078	42.95741	45.52935	47.53454	42.27903	39.67719	32.81692	36.9994	35.36659	34.45847	27.64039	27.9886
Iceland	0	0	0	0	0	0	0	0	0	0	0	0	0	0	0	0	0	0	0	0	0	0	0	0	0	0	0	0	0	0	0	0	0
Ireland	-0.614	-0.1978	-0.1122	-0.1368	-0.13203	-0.14236	-0.23	-0.21023	-0.10048	-0.07443	-0.21113	-0.22965	-0.22982	-0.24379	-0.37638	-0.25154	-0.25269	-0.36858	-0.4165	-0.36543	-0.40643	-0.22507	-0.11943	-0.04206	-0.15343	-0.05116	-0.62357	-0.5571	-0.45946	-0.2957	1.07504	0.72561	0.72561
Italy	68	68	65	78	82	84	67.08692	85.02164	108.86679	101.59421	109.38149	104.16806	112.43841	112.89483	118.46082	126.39341	136.19581	148.77165	143.78689	122.08842	134.52177	122.24008	129.83887	142.88928	153.21067	164.81356	166.53212	168.60951	160.78571	145.52558	156.14281	152.72141	154.51054
Luxembourg	0	0	0	0	0	0	0	0	0	0	0	0	0	0	0	0	0	0	0	0	0	0	0	0	0	0	0	0	0	0	0	0	0
Macedonia	NA	NA	NA	NA	NA	NA	NA	NA	NA	NA	NA	NA	-0.39621	-0.24952	0.05567	-0.0116	-0.0246	-0.17245	-0.10194	-0.14626	-0.14587	-0.18961	-0.12991	-0.08006	-0.07814	-0.04487	-0.04388	-0.06623	-0.09732	-0.1457	0.03087	0.04087	0.04087
Malta	0	0	0	0	0	0	0	0	0	0	0	0	0	0	0	0	0	0	0	0	0	0	0	0	0	0.04	0.04	0.02	0.02	0.02	0	0	0
Montenegro	NA	NA	NA	NA	NA	NA	NA	NA	NA	NA	NA	NA	NA	NA	NA	NA	NA	NA	NA	NA	NA	NA	NA	NA	NA	NA	0	0	0	0	0	0	0
Netherlands	30.747	33.368	52.568	66.527	82.39767	100.79353	123.43396	118.31235	108.70178	99.3767	107.71648	106.1707	86.40051	90.22204	74.03129	71.73465	76.53106	74.87502	76.36436	70.49987	72.18552	63.1591	57.61932	51.17223	48.59418	47.50539	38.04916	41.12248	31.47712	37.83117	34.84203	40.98095	54.7248
Netherlands (Offshore)	0	0	0	0	0	0	0	0	0	0	0	0	0	0	58.22702	45.9726	36.2377	32.74247	32	20	16	18.32603	40.7589	49.77562	47.62842	36.98356	32.57534	43.89315	34.07377	25.56438	20.30137	17.5863	16.99727
Norway	528.743	513.818	533.739	664.137	755.697	826.742	910.26988	1056.23435	1199.27302	1569.52884	1724.57074	1962.17599	2224.92447	2384.64443	2700.45181	2909.93425	3240.89048	3289.61074	3146.59724	3147.84047	3354.60925	3422.98368	3341.88449	3272.95665	3196.58757	2978.21084	2786.13958	2564.89394	2463.91665	2352.55525	2134.62055	2007.35031	1902.0844
Poland	8	8	5.5	5	5.78528	5.83648	6.37395	5.68756	5.74098	4.4209	4.50988	5.07251	6.60849	8.25439	8.56427	8.26511	9.18497	10.48058	13.87213	17.84058	22.8069	24.7933	23.01736	22.54004	34.79125	39.26743	41.05088	35.2317	35.27595	34.24601	28.65921	28.33946	27.68447
Portugal	-2.621	-2.2548	-3.0638	-2.7628	-1.43238	-0.84516	-0.38117	-0.43786	0.29277	-0.41416	-0.27221	-0.92524	-1.17171	-0.77163	0.65986	2.83669	2.98686	3.38499	3.15656	3.05958	2.40889	3.88537	3.74534	4.53724	3.84869	4.05163	5.7071	6.35641	6.96014	5.41664	5.57404	5.17594	5.24991
Romania	252	255	255.7	255	252	235	232.5671	226.82858	202.89889	189.85284	167.10147	145.82648	146.93911	142.78781	149.11362	148.97685	150.24095	149.59153	147.41622	139.92581	137.15915	139.5882	140.42832	133.6582	131.63173	124.72227	116.64128	115.65089	116.98435	112.69891	107.14475	105.34094	101.64779
Serbia	NA	NA	NA	NA	NA	NA	NA	NA	NA	NA	NA	NA	NA	NA	NA	NA	NA	NA	NA	NA	NA	NA	NA	NA	NA	NA	16.9475	16.85736	18.51229	19.99119	23.72507	21.30589	19.72234
Slovakia	NA	NA	NA	NA	NA	NA	NA	NA	NA	NA	NA	NA	NA	0.79966	1.09459	1.9769	2.0734	2.01305	1.70563	1.55202	3.19072	4.0666	8.99217	9.8725	11.16119	12.86667	13.32944	8.60999	10.30085	7.53781	7.68135	9.85793	9.27711
Slovenia	NA	NA	NA	NA	NA	NA	NA	NA	NA	NA	NA	NA	-0.13579	0.0046	-0.10457	-0.04579	0.01939	-0.05498	0.07271	0.02237	0.02833	0.01557	0.01505	0.01185	0.006	0.105	0.105	0.105	0.165	0.145	0.405	0.305	0.305
Spain	12.92	3.94	12.58	45.821	37.11099	40.15802	46.7563	43.75559	45.63417	38.73086	37.37874	41.7663	42.53642	34.24195	34.40983	32.26239	26.49762	22.82288	24.86683	21.93818	23.82755	27.65527	27.8576	33.16977	37.88717	37.54667	36.65612	28.20955	25.3903	29.48995	28.75125	28.45621	29.29182
Sweden	-6.175	-4.3418	-3.4278	-3.7348	0.05794	0.26928	1.97853	2.49037	2.37445	1.6453	1.59095	0.90224	1.25336	1.1152	0.77456	2.1056	2.12613	1.7583	1.92564	2.3186	1.56605	2.07054	3.50085	4.11898	4.60833	3.94963	5.87194	7.27194	8.4702	11.19146	10.41947	11.26664	11.26664
Switzerland	1.067	1.2932	1.1242	1.0718	1.29755	1.59302	1.74176	1.62531	1.40868	1.20937	1.16354	1.37516	1.1749	1.44166	1.59019	1.56494	1.72418	1.96453	2.19205	2.04627	1.70653	1.81901	1.94969	1.62806	3.36102	3.32237	3.46384	3.50384	3.65681	3.87793	3.60576	3.61281	3.61281
Turkey	40.973	43.7442	45.692	40.591	39.61904	39.60467	44.61519	48.4569	46.1589	53.38475	70.27655	85.28869	80.96551	74.14588	71.56944	66.13174	66.14749	67.23381	66.12644	58.38086	51.41923	46.82814	47.0884	45.81582	42.92824	45.96485	45.04999	45.84311	47.73348	54.59644	57.75023	57.63345	56.65329
United Kingdom	1674.25	1873.608	2164.454	2430.115	2652.0676	2711.47695	2735.07471	2612.83695	2442.71679	1996.6336	1982.15062	1994.67796	2044.89374	2143.59226	154.09759	163.89007	171.1379	167.23897	168.86661	147.37747	127.06681	117.22529	114.03407	103.35888	96.82753	91.46146	90.45688	88.88485	85.14396	87.38141	87.13009	82.65457	86.17039
United Kingdom (Offshore)	0	0	0	0	0	0	0	0	0	0	0	0	0	0	2500.1779	2654.66464	2720.53552	2647.54247	2749.25205	2835	2439.95665	2477.46841	2447.9726	2288.36937	1977.53943	1770.89952	1602.14244	1601.79917	1502.86446	1422.14455	1318.73663	1084.06849	922.38078
Armenia	NA	NA	NA	NA	NA	NA	NA	NA	NA	NA	NA	NA	0	0.00025	0	0	0	0	0	0	0	0	0	0	0	0	0	0	0	0	0	0	0
Azerbaijan	NA	NA	NA	NA	NA	NA	NA	NA	NA	NA	NA	NA	222.2473	206.45034	191.18341	180.54342	180.31778	179.90999	236.70952	283.61047	288.58721	308.86234	315.41845	325.17476	317.63403	440.00603	646.58046	849.0687	878.19273	1015.94529	1044.86167	993.22482	931.8823
Belarus	NA	NA	NA	NA	NA	NA	NA	NA	NA	NA	NA	NA	41.52311	34.75571	36.45672	34.11568	33.09382	33.59898	33.99988	33.94708	34.68791	35.372	33.46922	34.33129	35.03104	35.15458	35.60208	36.01088	35.29564	32.06294	32.07834	32.06834	32.06834
Estonia	NA	NA	NA	NA	NA	NA	NA	NA	NA	NA	NA	NA	-0.08259	-0.06626	-0.02485	0	0	7.34	4.4	3.02	4.747	5.13362	5.5304	6.13796	6.59204	6.9	7.28	7.40002	7.6	9	10	11	11
Former U.S.S.R.	11991	12150	12227	12302	12201	11935	12226.10138	12389.51996	12424.54816	12025.52851	11300.93852	10313.41449	NA	NA	NA	NA	NA	NA	NA	NA	NA	NA	NA	NA	NA	NA	NA	NA	NA	NA	NA	NA	NA
Georgia	NA	NA	NA	NA	NA	NA	NA	NA	NA	NA	NA	NA	2.88939	1.99832	1.82935	0.99203	1.19042	2.67287	2.17162	2.15351	1.99003	2.10783	1.46248	2.7807	1.9791	1.97739	0.99486	0.98383	0.97868	0.99321	1	1	1
Kazakhstan	NA	NA	NA	NA	NA	NA	NA	NA	NA	NA	NA	NA	442.60453	406.72656	416.46587	414.79108	458.76835	522.03241	526.90134	604.91706	725.62922	835.97119	967.51436	1061.97374	1245.86688	1337.17306	1387.86552	1445.64963	1430.94137	1541.56638	1608.6924	1638.35443	1605.87915
Kyrgyzstan	NA	NA	NA	NA	NA	NA	NA	NA	NA	NA	NA	NA	2.264	2	1.64	2	1.98	1.82472	1.73436	1.66184	2.02986	2.01058	1.50952	1.35818	1.36466	1.95843	1.97912	0.94623	0.94308	0.99983	-0.8424	-0.8424	-0.8424
Latvia	NA	NA	NA	NA	NA	NA	NA	NA	NA	NA	NA	NA	0	0	0	0	0	0	0	0	0	0	0	0	0.2	0.3	0.3	0.5	0.9	1.2	1.1	1	1
Lithuania	NA	NA	NA	NA	NA	NA	NA	NA	NA	NA	NA	NA	-0.45759	3.62011	5.16078	5.58042	6.45953	7.13075	9.48858	8.30742	9.55052	13.48161	13.43742	12.36198	11.41084	9.83302	8.37471	7.61921	10.04207	9.45376	9.71077	9.11077	9.11077
Moldova	NA	NA	NA	NA	NA	NA	NA	NA	NA	NA	NA	NA	0	0	0	0	0	0	0	0	0	0	0	0	0	0	0	0	-0.00996	-0.02464	-0.01731	-0.01731	-0.01731
Russia	NA	NA	NA	NA	NA	NA	NA	NA	NA	NA	NA	NA	7818.71693	6951.0065	6306.85915	6172.48893	6016.55705	6101.09035	6069.66507	6312.31629	6723.63889	7159.73476	7658.89118	8534.77855	9273.77037	9511.24158	9677.3983	9878.38862	9797.15329	9933.82661	10156.90567	10239.15888	10396.96725
Tajikistan	NA	NA	NA	NA	NA	NA	NA	NA	NA	NA	NA	NA	1.311	0.8	0.6	0.7	0.62567	0.62657	0.50303	0.49803	0.39202	0.32903	0.31178	0.35478	0.25277	0.2821	0.30303	0.28317	0.23794	0.2228	0.2198	0.2198	0.21855
Turkmenistan	NA	NA	NA	NA	NA	NA	NA	NA	NA	NA	NA	NA	110.23985	90.55313	87.27205	82.30102	89.65806	105.91515	126.17524	154.25933	156.63607	167.8753	192.56792	200.00085	213.94316	196.65006	177.21151	180.73092	189.36351	197.64378	201.87058	222.91907	244.06869
Ukraine	NA	NA	NA	NA	NA	NA	NA	NA	NA	NA	NA	NA	81.65399	84.22388	89.85349	87.9737	91.59219	94.68847	89.69967	87.47977	84.89139	86.74805	85.45992	88.84417	96.88536	99.38719	107.75607	107.71108	99.38764	93.55939	83.26343	78.90186	80.40402
Uzbekistan	NA	NA	NA	NA	NA	NA	NA	NA	NA	NA	NA	NA	66.16103	85.69882	115.4291	160.32282	163.94776	157.45158	161.15345	147.46389	151.91619	156.04377	153.25575	155.99554	142.00735	125.33253	107.49613	112.49503	109.97505	107.01893	106.7521	106.16579	102.5827
Bahrain	57	55	53	52	51	49	52.68359	51.87861	52.53257	51.95853	47.95983	43.85179	44.61771	54.5956	55.01508	52.8237	46.35835	53.71412	49.31047	49.56985	49.77501	49.25458	49.39291	49.58959	50.60605	47.52479	48.85322	48.43459	48.59778	48.68543	47.15771	48.15771	49.15771
Iran	1683	1402	2236	2460	2196	2272	2043.93462	2313.31914	2253.24351	2830.68212	3113.044	3357.59551	3476.16116	3591.23039	3672.47277	3708.59932	3747.66725	3727.91139	3703.32823	3620.59041	3765.38516	3799.99117	3523.96857	3833.03404	4104.20868	4238.58358	4149.34028	4039.02547	4177.53735	4178.29613	4243.07327	4225.61426	3538.38572
Iraq	2526	1009	1021	1014	1218	1447	1696.1687	2086.49227	2699.00939	2944.54419	2064.448	301.52301	421.46908	522.5952	567.26304	579.90374	593.40666	1172.34267	2162.13519	2520.20463	2581.9687	2408.82171	2039.79134	1318.04445	2020.56678	1889.41913	2009.44099	2096.63573	2384.55267	2399.1671	2402.87616	2628.99288	2986.64128
Israel	35	36	1	1	1	1	1.60454	1.40351	1.49166	0.8429	0.87511	-0.05471	0.1127	2.08435	2.8889	3.08268	3.52103	2.10879	3.43458	3.12693	3.66324	3.91387	2.74011	3.19412	5.95068	5.2457	3.83366	4.02907	4.023	5.98119	5.839	5.839	5.839
Jordan	0	0	0	0	0	0	1.21727	0.70725	0.83916	0.45269	0.5905	0.83069	0.41389	0.06115	0.18635	0.17974	0.1729	0.18037	-0.23044	-0.16389	-0.48596	-0.26655	-0.1751	-0.14172	-0.36402	-0.25859	-0.12821	0.08777	0.70646	0.61429	0.16276	0.16076	0.16476
Kuwait	1760	1195	872	1127	1233	1086	1482.68954	1664.2048	1579.22674	1877.62031	1234.10971	191.3972	1084.1664	1896.08941	2114.43484	2158.52341	2153.75922	2121.84126	2206.45424	2018.19665	2200.73368	2125.59516	2029.91077	2268.31392	2515.38205	2671.9799	2671.51292	2603.42559	2727.89534	2505.94295	2460.29305	2691.81774	2796.78775
Lebanon	0	0	0	0	0	0	-0.57726	-0.05464	0.27917	0.28534	0.32522	0.29146	0.28999	0.29865	0	0	0	0	0	0	0	0	0	0	0	0	0	0	0	0	0	0	0
Oman	284	321	326	377	417	502	562.74532	586.91883	621.69212	649.71478	693.49644	706.46764	744.45117	779.57691	814.18005	859.07402	891.08867	907.69346	903.62458	913.53483	972.04106	915.48762	899.48445	823.00979	754.29732	780.55853	743.85952	714.81372	759.69982	818.8882	869.85419	890.88709	923.77348
Palestinian Territories	NA	NA	NA	NA	NA	NA	NA	NA	NA	NA	NA	NA	NA	NA	NA	NA	NA	0	0	0	0	0	0	0	0	0	0	0	0	0	0	0	0
Qatar	483	430	361	321	423	332	331.15945	318.54792	378.27936	405.773	447.62222	446.79421	480.11274	470.30015	467.05448	499.00876	562.9769	622.68447	783.31247	778.82358	874.52442	864.81023	840.75927	927.02416	1043.22294	1111.04458	1138.14378	1121.07605	1203.82844	1212.72046	1440.86079	1641.17583	1579.18437
Saudi Arabia	10285	10265	6929	5430	5033	3778.01	5254.63966	4673.71736	5577.20362	5555.18073	7018.83364	8789.90176	9036.07454	8893.56852	9101.1643	9235.03793	9237.93117	9400.13067	9471.65309	8907.01622	9475.74895	9156.63995	8809.50666	10076.81061	10496.24133	11096.30789	10665.43882	10248.62275	10782.29692	9757.17231	10522.32729	11154.25879	11545.67709
Syria	164	166	160	167	170	178	190.1442	225.72684	259.83973	337.13376	385.05789	490.55821	478.45598	557.52047	563.48557	583.65877	600.83137	579.49638	572.12733	557.93569	546.78467	513.37535	519.7802	510.1629	488.06332	463.79396	438.82722	411.87022	400.34998	400.1077	404.42533	334.24225	182.45552
United Arab Emirates	1747	1538	1343	1272	1279	1356	1515.31226	1686.27839	1694.79475	1989.51788	2251.76592	2531.01697	2409.90238	2304.74704	2342.82378	2395.83109	2439.37922	2479.59418	2518.50568	2337.20428	2572.32543	2500.04083	2386.83313	2660.82958	2766.74508	2844.62628	2948.46855	2947.49714	3046.87307	2794.55158	2813.24377	3088.2562	3213.19427
Yemen	0	0	0	0	0	0	8.58627	18.70116	171.80728	192.73458	190.95913	193.88303	180.97396	218.4404	334.71036	345.1546	341.33863	361.98951	387.40936	408.48168	437.23131	439.97498	438.8405	430.70944	406.24082	401.93483	378.17638	320.03943	299.69879	286.08184	259.81327	164.48348	156.54338
Algeria	1143	1052	1046	1018.26	1115	1142.071	1190.26068	1199.75516	1173.53572	1233.90889	1314.65491	1309.48924	1341.1767	1311.67067	1295.62274	1306.73797	1376.02494	1417.25029	1402.432	1388.61603	1433.02529	1513.89265	1617.65305	1784.04302	1844.52503	1956.77809	1967.49345	1967.54505	1954.4593	1909.81487	1880.96519	1862.96519	1875.20836
Angola	150	130	122	177	208	231	281.32697	359.34804	451.34969	454.34741	474.35485	499.34484	525.68738	508.37485	535.37247	645.22395	708.18124	713.42295	734.62757	744.55684	746.11311	741.90412	896.14301	902.30472	1054.41503	1260.50533	1434.91669	1768.46411	2014.33173	1948.02883	1987.75623	1839.88677	1871.6428
Benin	0	0	0	4	7	8	8	7	5	4	4	4	5.594	5.778	5.93	3	2	1.32	1	1	0.69	0.7	0.8	0.4	0	0	0	0	0	0	0	0	0
Botswana	0	0	0	0	0	0	0	0	0	0	0	0	0	0	0	0	0	0	0	0	0	0	0	0	0	0	0	0	0	0	0	0	0
Burkina Faso	0	0	0	0	0	0	0	0	0	0	0	0	0	0	0	0	0	0	0	0	0	0	0	0	0	0	0	0	0	0	0	0	0
Burundi	0	0	0	0	0	0	0	0	0	0	0	0	0	0	0	0	0	0	0	0	0	0	0	0	0	0	0	0	0	0	0	0	0
Cameroon	58	87	109	114	135	185	176.67159	173.71429	162.71632	169.6859	160.59853	152.93133	140.43551	127.14527	108.33014	111.40787	108.38556	124.45723	120.9575	100.49664	85.05965	76.89133	69.90076	67.21815	66.34701	82.70864	86.80748	83.15674	81.78026	77.42024	65.52425	62.18452	63.52425
Cape Verde	0	0	0	0	0	0	0	0	0	0	0	0	0	0	0	0	0	0	0	0	0	0	0	0	0	0	0	0	0	0	0	0	0
Central African Republic	0	0	0	0	0	0	0	0	0	0	0	0	0	0	0	0	0	0	0	0	0	0	0	0	0	0	0	0	0	0	0	0	0
Chad	0	0	0	0	0	0	0	0	0	0	0	0	0	0	0	0	0	0	0	0	0	0	0	36.06849	170.58743	176.65753	157.91781	144.20274	127.16393	119.47123	122.52055	114.96438	104.48361
Comoros	0	0	0	0	0	0	0	0	0	0	0	0	0	0	0	0	0	0	0	0	0	0	0	0	0	0	0	0	0	0	0	0	0
Congo (Brazzaville)	65	83	89	87	121	120	118.73098	122.88339	143.8932	163.88339	164.83652	155.73368	173.70976	180.76701	179.7001	187.7466	200.74086	264.6339	276.6326	282.92822	291.9074	266.35027	259.9621	255.52326	242.92704	235.87597	247.29583	213.65064	239.87766	274.48652	311.91159	298.91159	291.91159
Congo (Kinshasa)	20	20	23	25	32	33	31.96151	32.11071	30.16333	28.22377	29.1844	28.05499	25.9073	24.84136	25.84287	29.87049	29.87156	28.24604	26.3056	22.21708	26.01703	24.01708	22.66575	22	21.0847	19.74795	20	22.15616	19.95765	22	21	20.16164	20
Cote dIvoire (IvoryCoast)	2	8	10	24	28	28.8	19.93416	17.98511	11.76501	1.71135	1.70517	1.81934	1.30009	0.83229	7.32588	8.47313	16.26134	19.5415	20.91684	15.95298	12.36467	11.54063	13.07471	19.85158	27.77691	39.93577	63.29672	53.04377	59.93157	58.47994	44.47976	40.23593	38.56219
Djibouti	0	0	0	0	0	0	0	0	0	0	0	0	0	0	0	0	0	0	0	0	0	0	0	0	0	0	0	0	0	0	0	0	0
Egypt	613	616	691	753	848	915	826.49893	910.59658	872.59297	899.23642	901.35229	906.99024	883.16327	898.06075	903.68756	929.49504	933.67344	869.67084	848.13526	872.89353	793.33734	748.06048	742.55169	744.09538	700.09207	682.77395	682.8348	673.67169	706.52229	728.62067	717.35581	725.67909	720.02479
Equatorial Guinea	0	0	0	0	0	0	0	0	0	0	0	0.102	1.55	4.5	5	5	17.093	52.42192	83	102	167.5	181.43836	212.56164	206.46588	368.20765	375.47671	362.86575	368.52877	359.20315	346.01607	322.71038	297.37022	318
Eritrea	NA	NA	NA	NA	NA	NA	NA	NA	NA	NA	NA	NA	NA	NA	-0.25778	-0.26316	-0.26515	-0.26588	0	0	0	0	0	0	0	0	0	0	0	0	0	0	0
Ethiopia	0	0	0	0	0	0	-0.25884	-0.252	-0.2564	-0.30897	-0.31635	-0.05196	-0.10383	-0.19707	0	0	0	0	0	0	0	0	0	0	0	0	0	0	0.1	0.1	0.1	0.1	0.1
Gabon	176	152	157	158	158	173	165.91413	154.89098	158.95961	207.83042	269.8357	293.83527	297.47835	312.38617	328.40559	364.80036	368.08928	370.26741	351.89153	330.81966	314.79176	269.80235	251.04817	241.1596	238.77112	266.02883	236.88244	243.897	247.74844	241.92754	245.50833	244.35491	241.95949
Gambia, The	0	0	0	0	0	0	0	0	0	0	0	0	0	0	0	0	0	0	0	0	0	0	0	0	0	0	0	0	0	0	0	0	0
Ghana	2	2	2	2	2	1	0.23041	0.09429	0.08566	-0.05667	-0.04152	0.22565	1.23409	1.81067	1.43603	4.05854	6.63827	5.16046	4.99377	5.99592	7.13187	7.18333	7.43318	7.47741	8.57353	7.39939	7.08103	7.69119	7.22731	6.88771	8.46391	77.78719	79.63006
Guinea	0	0	0	0	0	0	0	0	0	0	0	0	0	0	0	0	0	0	0	0	0	0	0	0	0	0	0	0	0	0	0	0	0
Guinea-Bissau	0	0	0	0	0	0	0	0	0	0	0	0	0	0	0	0	0	0	0	0	0	0	0	0	0	0	0	0	0	0	0	0	0
Kenya	1	1	1	1	1	1	-0.14971	-0.08071	-0.08313	-0.0287	-0.1002	-0.13099	-0.10723	-0.15289	-0.06341	0.02949	0.00594	-0.05166	0.01098	-0.01533	-0.05479	-0.09184	-0.16557	-0.07992	-0.26325	-0.16089	-0.31759	-0.13615	-0.16178	-0.16742	-0.05809	-0.05809	-0.05809
Lesotho	0	0	0	0	0	0	0	0	0	0	0	0	0	0	0	0	0	0	0	0	0	0	0	0	0	0	0	0	0	0	0	0	0
Liberia	0	0	0	0	0	0	0	0	0	0	0	0	0	0	0	0	0	0	0	0	0	0	0	0	0	0	0	0	0	0	0	0	0
Libya	1827	1175	1190	1135	1124	1085	1061.62687	999.0107	1201.68334	1182.92791	1407.19696	1520.91666	1470.45919	1399.54433	1416.49625	1428.19859	1447.31335	1504.04624	1448.15649	1376.99874	1469.34531	1427.84153	1383.18318	1484.8877	1582.29672	1721.29252	1809.57667	1844.70319	1874.4418	1790.10934	1789.10981	501.46597	1483.04423
Madagascar	0	0	0	0	0	0	-0.17224	-0.08877	-0.11341	-0.07313	-0.08841	-0.10686	-0.03472	-0.03497	-0.03402	-0.03138	-0.03168	-0.03102	-0.0287	-0.0287	0.06914	0.08415	0.08927	0.09059	0.09218	0.08457	0	0	0	0	0	0	0
Malawi	0	0	0	0	0	0	0	0	0	0	0	0	0	0	0	0	0	0	0	0	0.2	0.2	0.2	0.2	0.2	0.2	0.2	0.2	0.2	0.2	0.2	0.2	0.2
Mali	0	0	0	0	0	0	0	0	0	0	0	0	0	0	0	0	0	0	0	0	0	0	0	0	0	0	0	0	0	0	0	0	0
Mauritania	0	0	0	0	0	0	0	-0.33338	0.16046	0.11011	0.11728	0.1102	-0.04666	-0.10065	-0.06042	-0.097	-0.09532	-0.09554	-0.09848	-0.09848	-0.09266	0	0	0	0	0	30.61918	14.99178	12.83333	11.24522	8.23223	7.73764	6.69749
Mauritius	0	0	0	0	0	0	0	0	0	0	0	0	0	0	0	0	0	0	0	0	0	0	0	0	0	0	0	0	0	0	0	0	0
Morocco	2	2	2	2	2	2	-1.23401	-0.06086	0.15734	-0.01258	-0.73418	-0.83133	-0.84792	-1.37485	-1.46369	-1.17792	3.93057	4.78675	4.47664	3.81373	4.02365	4.03491	4.48438	3.72307	3.44645	4.30974	4.05268	3.93794	4.72237	4.75983	5.05691	5.05691	5.05691
Mozambique	0	0	0	0	0	0	0	0	0	0	0	0	0	0	0	0	0	0	0	0	0	0	0	0	0	0	0	0	0	0.02	0.02	0.02	0.02
Namibia	NA	NA	NA	NA	NA	NA	NA	NA	NA	NA	0	0	0	0	0	0	0	0	0	0	0	0	0	0	0	0	0	0	0	0	0	0	0
Niger	0	0	0	0	0	0	0	0	0	0	0	0	0	0	0	0	0	0	0	0	0	0	0	0	0	0	0	0	0	0	0	6.71233	20
Nigeria	2060	1438	1300	1246	1393	1500	1469.90721	1344.40404	1453.98671	1721.63691	1816.85827	1898.17014	1950.60942	1966.9371	1936.40082	1998.07723	2006.75072	2139.78906	2160.04145	2136.305	2169.13511	2261.41605	2123.32298	2278.59203	2331.69623	2630.86027	2442.25006	2352.75555	2168.86528	2212.18016	2459.40356	2554.48849	2524.14328
Reunion	0	0	0	0	0	0	0	0	0	0	0	0	0	0	0	0	0	0	0	0	0	0	0	0	0	0	0	0	0	0	0	0	0
Rwanda	0	0	0	0	0	0	0	0	0	0	0	0	0	0	0	0	0	0	0	0	0	0	0	0	0	0	0	0	0	0.01	0.01	0.01	0.01
Saint Helena	0	0	0	0	0	0	0	0	0	0	0	0	0	0	0	0	0	0	0	0	0	0	0	0	0	0	0	0	0	0	0	0	0
Sao Tome and Principe	0	0	0	0	0	0	0	0	0	0	0	0	0	0	0	0	0	0	0	0	0	0	0	0	0	0	0	0	0	0	0	0	0
Senegal	0	0	0	0	0	0	0.14657	-0.10113	-0.15271	-0.12559	-0.17568	-0.09497	-0.06304	-0.04557	-0.00703	-0.0103	-0.00877	-0.07428	-0.03745	-0.01158	0.01548	-0.02753	-0.02113	-0.03129	-0.05876	-0.03865	-0.01342	-0.06512	-0.08098	-0.03246	-0.03411	-0.03411	-0.03411
Seychelles	0	0	0	0	0	0	0	0	0	0	0	0	0	0	0	0	0	0	0	0	0	0	0	0	0	0	0	0	0	0	0	0	0
Sierra Leone	0	0	0	0	0	0	-0.01145	-0.05387	-0.03979	-0.03823	-0.03798	-0.03757	-0.00739	-0.03461	0.12848	-0.00365	-0.00364	-0.0039	-0.00264	-0.00264	-0.00204	0	0.00084	0.00399	0.0007	0.00299	0.02898	0.02539	0.03298	0	0	0.02539	0.02539
Somalia	0	0	0	0	0	0	0.19584	0.12925	0.1292	0.13156	0.12321	0.05966	0.05381	0.05374	0.05374	0.05374	0.05374	0.05374	0.05374	0.05374	0	0	0	0	0	0	0	0	0	0	0	0	0
South Africa	0	4	20	55	55	60	67.13157	72.14077	67.25542	77.27313	77.36143	77.41471	140.19349	194.52064	195.09187	206.78873	208.17993	210.41599	213.80694	194.83037	201.63061	209.28577	211.44428	202.30936	234.04175	215.21075	201.40674	196.19566	193.71329	182.61663	180.46426	181.04111	180.95368
Sudan and South Sudan	0	0	0	0	0	0	-0.16724	-0.14726	-0.01788	0.01768	0.01818	-0.27209	0.13407	0.13964	-0.11545	0.04171	1.84694	4.84733	9.84816	68.61734	186.98453	210.83491	240.4934	271.87904	344.84255	352.40727	381.34794	466.76212	479.83065	485.98729	514.49341	454.87834	120.98213
Swaziland	0	0	0	0	0	0	0	0	0	0	0	0	0	0	0	0	0	0	0	0	0	0	0	0	0	0	0	0	0	0	0	0	0
Tanzania	0	0	0	0	0	0	0.01662	0.07825	0.03202	-0.22913	-0.16237	-0.13356	-0.00182	-0.16099	-0.15787	-0.1585	-0.15681	-0.15565	-0.15693	-0.1657	0	0	0	0	0	0	0	0	0	0.01	0.01	0.01	0.01
Togo	0	0	0	0	0	0	0	0	0	0	0	0	0	0	0	0	0	0	0	0	0	0	0	0	0	0	0	0	0	0	0	0	0
Tunisia	110	118	120	120	120	114	110.58057	108.53584	107.66721	109.59985	97.7073	109.03388	114.43272	102.13204	95.96986	90.05442	87.97771	84.98717	81.2498	83.69611	80.49893	72.58098	78.55014	77.36913	81.66704	76.7478	78.24085	85.88712	86.72786	91.324	84.47639	70.81885	68.30661
Uganda	0	0	0	0	0	0	0	0	0	0	0	0	0	0	0	0	0	0	0	0	0	0	0	0	0	0	0	0	0	0	0	0	0
Western Sahara	0	0	0	0	0	0	0	0	0	0	0	0	0	0	0	0	0	0	0	0	0	0	0	0	0	0	0	0	0	0	0	0	0
Zambia	0	0	0	0	0	0	0.1403	0.1583	0.46549	0.21139	0.12828	0.16336	0.13192	0.14657	0.14526	0.14603	0.1476	0.14895	0.15435	0.05809	0.00802	0.12579	0.13021	0.14005	0.15	0.15928	0.15948	0.19034	0.14016	0.14156	0.17461	0.17461	0.17461
Zimbabwe	0	0	0	0	0	0	0	0	0	0	0	0	0	0	0	0	0	0	0	0	0	0	0	0	0	0	0	0	0.04	0.06	0.12	0.12	0.12
Afghanistan	0	0	0	0	0	0	0	0	0	0	0	0	0	0	0	0	0	0	0	0	0	0	0	0	0	0	0	0	0	0	0	0	0
American Samoa	0	0	0	0	0	0	0	0	0	0	0	0	0	0	0	0	0	0	0	0	0	0	0	0	0	0	0	0	0	0	0	0	0
Australia	460.24	474.194	443.505	489.469	570.58205	664.61293	606.18136	638.62713	632.63654	582.72137	666.49448	635.18088	618.74827	589.63728	624.80948	646.64609	666.92907	694.68443	649.26045	646.94061	828.05825	768.25713	744.24488	629.81298	557.34419	572.96896	554.52837	587.44902	587.71699	592.48632	604.10564	530.50665	519.06496
Bangladesh	0	0	0	0.22	0.41	0.735	0.6521	0.61785	0.76379	0.66923	1.00148	0.87309	0.99804	1.1995	1.59105	1.32997	1.4889	2.23274	2.1566	1.9805	3.21103	4.10149	6.82469	6.91283	6.74582	6.75957	6.73288	6.72417	6.4086	5.68375	5.78511	5.78511	5.45178
Bhutan	0	0	0	0	0	0	0	0	0	0	0	0	0	0	0	0	0	0	0	0	0	0	0	0	0	0	0	0	0	0	0	0	0
Brunei	270	188	179	187	175	168	181.20454	150.20697	148.20751	142.22395	160.24832	171.38773	177.51521	177.68001	180.22205	176.22726	166.65979	175.26254	179.67859	204.26522	215.36776	217.58366	189.4066	196.36775	204.43115	213.14754	220.40883	175.5119	157.76447	154.60556	159.40463	152.17724	140.72386
Burma (Myanmar)	30	27	30	30	32	30	24.23796	17.20662	13.86464	16.15033	14.14321	16.10944	15.01327	14.12893	14.19946	10.11118	8.41947	9.59767	11.61972	10.16231	12.74034	10.48798	15.60241	15.68731	20.68387	20.75072	23.79111	21.95458	22.06018	18.77626	21.15598	20.82722	20.82722
Cambodia	0	0	0	0	0	0	0	0	0	0	0	0	0	0	0	0	0	0	0	0	0	0	0	0	0	0	0	0	0	0.6	0.081	0.0005	0.0005
China	2114	2012	2045	2120	2296	2505	2587.5074	2680.48857	2722.22788	2749.24024	2768.04442	2836.20371	2851.94239	2903.46328	2957.31415	3059.62461	3211.28816	3284.55511	3301.74483	3317.02833	3377.52732	3434.63486	3534.86154	3572.90599	3674.7525	3809.01563	3884.34579	3956.03877	4036.66601	4067.54429	4362.65795	4346.98288	4416.17745
Cook Islands	0	0	0	0	0	0	0	0	0	0	0	0	0	0	0	0	0	0	0	0	0	0	0	0	0	0	0	0	0	0	0	0	0
Fiji	0	0	0	0	0	0	0	0	0	0	0	0	0	0	0	0	0	0	0	0	0	0	0	0	0	0	0	0	0	0	0.01	0.03	0.03
French Polynesia	0	0	0	0	0	0	0	0	0	0	0	0	0	0	0	0	0	0	0	0	0	0	0	0	0	0	0	0	0	0	0	0	0
Guam	0	0	0	0	0	0	0	0	0	0	0	0	0	0	0	0	0	0	0	0	0	0	0	0	0	0	0	0	0	0	0	0	0
Hawaiian Trade Zone	0	0	0	0	0	-0.07457	-0.29603	NA	NA	NA	NA	NA	NA	NA	NA	NA	NA	NA	NA	NA	NA	NA	NA	NA	NA	NA	NA	NA	NA	NA	NA	NA	NA
Hong Kong	0	0	0	0	0	0	0	0	0	0	0	0	0	0	0	0	0	0	0	0	0	0	0	0	0	0	0	0	0	0	0.1	0.1	0.1
India	185.5	329.4	394.5	485	525	626	645.72514	626.87336	654.51519	723.78642	681.81278	639.26725	602.05884	577.56631	650.63476	769.71452	750.86335	779.61609	761.30549	764.78454	772.95094	784.63081	815.86516	818.3335	846.60083	824.06137	853.30561	852.64382	874.9688	873.59378	965.30151	995.80532	990.17788
Indonesia	1659	1712	1431	1448	1498	1380	1425.53759	1369.62272	1368.83013	1480.59448	1537.02098	1665.9638	1576.90754	1588.09088	1589.00206	1581.58042	1638.83182	1607.54839	1616.03923	1568.82927	1530.27842	1433.58079	1340.03153	1245.31816	1183.37849	1149.52588	1102.21198	1041.53492	1065.41564	1053.15139	1038.71063	1015.48049	974.25503
Japan	39.5	38	44	38.5	46.4	50.55	52.33086	54.90148	59.53452	62.56727	66.58838	77.47666	81.65835	84.54281	81.65123	90.95009	99.97622	101.07275	104.44808	109.48328	112.19908	121.0593	120.17484	116.56882	123.39171	128.45471	131.5628	132.44415	125.27161	137.62415	142.47224	136.25701	135.51252
Kiribati	0	0	0	0	0	0	0	0	0	0	0	0	0	0	0	0	0	0	0	0	0	0	0	0	0	0	0	0	0	0	0	0	0
Korea, North	0	0	0	0	0	0	0.61571	0.61571	0.39609	0.48687	0.62053	0.74104	0.86271	0.92199	0.67223	0.61892	0.31373	0.25407	0.79701	0.55277	0.66887	0.14011	0.14138	0.13847	0.14097	0.12071	0.09299	0.11803	0.12329	0.09011	0.0872	0.0872	0.0872
Korea, South	0	0	0	0	-12.73343	-9.0202	-8.14502	-7.43458	-9.56385	-11.78581	-9.82855	-20.74299	-23.58882	-23.47615	-23.74542	-22.34239	-15.22846	-0.69445	10.65933	5.51556	14.01131	14.78219	21.91326	14.58882	16.91784	17.24807	28.01536	30.03316	33.6573	54.65003	58.47474	59.78946	61.04358
Laos	0	0	0	0	0	0	0	0	0	0	0	0	0	0	0	0	0	0	0	0	0	0	0	0	0	0	0	0	0	0	0	0	0
Macau	0	0	0	0	0	0	0	0	0	0	0	0	0	0	0	0	0	0	0	0	0	0	0	0	0	0	0	0	0	0	0	0	0
Malaysia	284	265	307	366	451	451	513.12304	508.20491	550.66328	597.10074	629.56985	656.671	666.52189	660.38636	676.32349	717.55351	730.02571	765.38326	823.13294	793.17348	771.03155	751.13964	794.9174	841.68182	861.81005	752.77448	732.81629	704.5962	730.63165	693.87487	683.07062	625.97615	639.81309
Maldives	0	0	0	0	0	0	0	0	0	0	0	0	0	0	0	0	0	0	0	0	0	0	0	0	0	0	0	0	0	0	0	0	0
Mongolia	0	0	0	0	0	0	0	0	0	0	0	0	0	0	0	0	0	0	0.123	0.197	0.179	0.202	0.381	0.501	0.589	0.55	1.032	2.329	3.208	5.123	5.976	6.9833	9.93451
Nauru	0	0	0	0	0	0	0	0	0	0	0	0	0	0	0	0	0	0	0	0	0	0	0	0	0	0	0	0	0	0	0	0	0
Nepal	0	0	0	0	0	0	0	0	0	0	0	0	0	0	0	0	0	0	0	0	0	0	0	0	0	0	0	0	0	0	0	0	0
New Caledonia	0	0	0	0	0	0	0	0	0	0	0	0	0	0	0	0	0	0	0	0	0	0	0	0	0	0	0	0	0	0	0	0	0
New Zealand	9	12	17	18	20	23.8	42.83712	44.12655	52.54361	56.71266	58.74794	58.10545	57.58649	60.4851	57.35197	47.96095	46.85299	68.18334	57.06277	52.10762	47.67982	43.94188	40.99065	31.8152	27.93972	27.77375	25.66901	47.59725	65.27087	61.02682	60.77085	52.17398	48.19111
Niue	0	0	0	0	0	0	0	0	0	0	0	0	0	0	0	0	0	0	0	0	0	0	0	0	0	0	0	0	0	0	0	0	0
Pakistan	11.2	11.2	13.2	14.2	18.2	36.2	42.10929	42.07039	45.14428	48.03053	62.0385	63.34105	63.67468	62.54939	57.65096	61.94776	57.6238	59.56035	57.84336	56.57179	56.76279	63.37444	67.93074	64.33019	66.5916	68.12617	69.25662	68.68692	62.60389	59.84647	64.89833	63.41086	61.66475
Papua New Guinea	0	0	0	0	0	0	0	0	0	0	0	0.2	53	125.877	110.00005	100.0243	103.38489	80.02505	79.08601	96.62299	70.0853	67.52336	55.15342	50.49315	45.60142	40.30436	44.64739	42.20439	38.18912	34.9878	30.51382	30.15766	27.48826
Philippines	16	3	9	14	13	10	7.89496	5.54907	5.85065	4.72863	3.82956	2.58945	7.28011	7.7982	6.1846	3.13334	-1.61582	-2.08121	-1.51135	-0.86955	-0.42457	7.83791	10.43273	14.09612	24.30695	25.77116	26.28724	25.3893	27.21825	28.89836	38.59354	31.89218	25.24287
Samoa	0	0	0	0	0	0	0	0	0	0	0	0	0	0	0	0	0	0	0	0	0	0	0	0	0	0	0	0	0	0	0	0	0
Singapore	4	4	4	4	4	4	-6.21418	1.05774	-5.696	-6.57233	-6.03659	-1.8867	-4.0466	-0.60021	-3.11353	-1.18541	6.43491	5.43412	3.19044	6.28971	13.09457	14.95604	8.29042	9.70066	9.83605	8.57323	9.96656	11.60831	23.54809	20.57914	20.16743	20.16743	20.16743
Solomon Islands	0	0	0	0	0	0	0	0	0	0	0	0	0	0	0	0	0	0	0	0	0	0	0	0	0	0	0	0	0	0	0	0	0
Sri Lanka	0	0	0	0	0	0	-0.34963	-0.41903	-0.40054	-0.32023	-0.30303	-0.42392	-0.36891	-0.27835	-0.38705	-0.35217	-0.56406	-0.52205	-0.40593	-0.36756	-0.44087	-0.47399	-0.5264	-0.55094	-0.50835	-0.55377	-0.42425	-0.63651	-0.60441	-0.61835	-0.54346	-0.54346	-0.54346
Taiwan	9	10	8	8	8	6	-2.20352	0.07149	-2.74946	-5.29971	-5.35028	-6.09741	-4.56903	-4.69727	-4.33106	-6.99617	-6.33711	-7.0481	-7.10035	-7.68378	-6.37495	3.6058	8.36396	7.89501	10.5974	15.96061	21.10244	26.77683	16.65837	29.01559	21.28657	22.28657	22.28657
Thailand	1.3	2.3	12	18	30	53	52.2787	48.63332	53.07634	51.1579	57.81278	60.77483	66.61334	69.70037	80.99158	91.51258	100.11334	132.83775	147.14368	158.0938	181.8532	191.79247	206.42177	261.06521	258.60968	309.53037	340.24412	373.42953	406.95249	428.67942	430.25833	416.78955	433.28808
Timor-Leste (East Timor)	NA	NA	NA	NA	NA	NA	NA	NA	NA	NA	NA	NA	NA	NA	NA	NA	NA	NA	NA	NA	NA	NA	NA	0	51.90984	94.42466	100.90137	78.48327	100.00753	96.26596	87.49863	83.74247	79.49454
Tonga	0	0	0	0	0	0	0	0	0	0	0	0	0	0	0	0	0	0	0	0	0	0	0	0	0	0	0	0	0	0	0	0	0
U.S. Pacific Islands	0	0	0	0	0	0	0	0	0	0	0	0	0	0	0	0	0	0	0	0	0	0	0	0	0	0	0	0	0	0	0	0	0
Vanuatu	0	0	0	0	0	0	0	0	0	0	0	0	0	0	0	0	0	0	0	0	0	0	0	0	0	0	0	0	0	0	0	0	0
Vietnam	0	0	0	0	0	0	0.8	5	15.00079	32.00931	50.00124	80.00124	106.23124	120.00124	140.50819	173.30261	175.45205	191.26178	245.746	289.8	316	356.79943	339.59452	352.50685	403.28689	394.33335	363.43691	333.66301	309.64726	339.76078	332.2511	323.59631	363.53586
Wake Island	0	0	0	0	0	0	0	0	0	0	0	0	0	0	0	0	0	0	0	0	0	0	0	0	0	0	0	0	0	0	0	0	0
