# Supplementary material
Source: MDPI journal article supplement (https://www.mdpi.com/1099-4300/15/12/5565)
Supplement: s2 [file s2 › Sources/data/Petroleum Use.csv]

Region	1980	1981	1982	1983	1984	1985	1986	1987	1988	1989	1990	1991	1992	1993	1994	1995	1996	1997	1998	1999	2000	2001	2002	2003	2004	2005	2006	2007	2008	2009	2010	2011	2012
North America	40.78368	38.41625	36.44763	35.73024	36.92912	36.93029	38.29757	39.22233	40.77904	41.13815	40.18825	39.60747	40.41988	40.68574	41.78048	41.48717	42.92077	43.72345	44.60301	45.79308	46.62176	46.29821	46.24733	47.0889	49.14056	49.1792	48.52017	49.22073	45.916	43.65505	44.4195	44.10116	43.42586
Bermuda	0.00793	0.00686	0.00727	0.00771	0.00752	0.00741	0.007	0.00988	0.0108	0.01315	0.00928	0.00805	0.00647	0.00695	0.00743	0.00739	0.0075	0.00752	0.00752	0.00752	0.0075	0.00744	0.00752	0.00814	0.00869	0.00927	0.00922	0.01018	0.00853	0.00971	0.00955	0.00848	0.0088
Canada	3.97326	3.64019	3.23997	2.96623	3.07572	3.06232	3.07713	3.21504	3.36711	3.51543	3.46682	3.32502	3.41861	3.45217	3.50167	3.58371	3.70406	3.86854	3.87597	4.0142	4.27218	4.07997	4.12115	4.37536	4.84081	4.61574	4.41555	4.83045	4.39832	4.22249	4.37894	4.49056	4.56514
Greenland	0.00786	0.0074	0.00719	0.00503	0.00797	0.00714	0.00462	0.00335	0.00777	0.00671	0.00787	0.00779	0.00687	0.00708	0.00719	0.00719	0.00728	0.00746	0.00756	0.00756	0.00772	0.00796	0.00805	0.00809	0.00813	0.00829	0.00846	0.00826	0.00921	0.00893	0.00893	0.00842	0.00827
Mexico	2.58791	2.82739	2.95894	2.69686	2.78251	2.92678	3.00818	3.12727	3.16737	3.38991	3.14907	3.41718	3.45979	3.47325	3.70182	3.44929	3.52536	3.68019	3.89507	3.92512	4.0716	4.01636	3.8855	3.8848	3.99001	4.15661	4.13041	4.59666	4.21878	4.00943	4.01131	4.12695	4.15392
Saint Pierre and Miquelon	0.0022	0.00221	0.00203	0.00221	0.00216	0.00191	0.0024	0.00306	0.00319	0.00365	0.00359	0.00341	0.00318	0.00174	0.00183	0.00122	0.00121	0.00083	0.00096	0.00096	0.00105	0.00096	0.00096	0.00105	0.00113	0.00117	0.00118	0.00122	0.00124	0.00122	0.00122	0.00126	0.00207
United States	34.20452	31.93221	30.23223	30.05222	31.05324	30.92473	32.19826	32.86373	34.2228	34.2093	33.55162	32.84603	33.52496	33.74455	34.56054	34.43837	35.67535	36.1589	36.81591	37.83771	38.26171	38.18551	38.22415	38.81144	40.29178	40.38812	39.95535	39.77396	37.27992	35.40327	36.00954	35.4655	34.68766
Central & South America	7.55969	7.38011	7.07693	6.65921	6.76909	6.65256	7.14601	7.35036	7.41796	7.44583	7.76085	7.8852	8.07876	6.19988	8.72913	9.16422	9.57857	10.04887	10.39918	10.6329	10.63525	10.89485	10.75539	10.67407	11.01617	11.305	11.75724	11.99374	12.74047	12.42008	12.93488	13.28456	13.67157
Antarctica	0.00213	0.00213	0.00212	0.00213	0.0027	0.00304	0.00275	0.00283	0.00291	0.00288	0.00292	0.00305	0.00304	0.00304	0.00305	0.00314	0.00313	0.00314	0.00314	0.00314	0.00313	0.00318	0.00318	0.00327	0.00325	0.00348	0.00348	0.00335	0.00383	0.00335	0.00102	0.00193	0.00135
Antigua and Barbuda	0.00598	0.00531	0.00711	0.00415	0.0047	0.00461	0.00462	0.00564	0.0058	0.00582	0.00608	0.006	0.00598	0.00588	0.00661	0.00679	0.00677	0.00705	0.00705	0.00705	0.00725	0.00727	0.00732	0.00776	0.00836	0.00909	0.00927	0.00891	0.00692	0.00943	0.00941	0.00827	0.00827
Argentina	1.03056	0.99214	0.95864	0.97476	0.96496	0.84705	0.94684	0.99506	0.97528	0.88855	0.84405	0.86275	0.902	0.73337	0.92531	0.91106	0.96924	0.97887	1.02748	1.06186	1.04164	0.96855	0.88247	0.91585	0.94369	1.00124	1.0738	1.17782	1.23437	1.19013	1.25639	1.37335	1.41539
Aruba	NA	NA	NA	NA	NA	NA	0.00146	0.00146	0.00556	0.00747	0.00787	0.00858	0.00921	0.0089	0.0104	0.01201	0.0079	0.01264	0.01277	0.01277	0.01349	0.01353	0.01353	0.01442	0.01452	0.01487	0.01597	0.01461	0.0141	0.01419	0.01419	0.01266	0.01238
Bahamas, The	0.0599	0.06258	0.05372	0.04065	0.03669	0.03321	0.03275	0.03622	0.0338	0.03847	0.04116	0.0365	0.03061	0.02965	0.03625	0.04254	0.04778	0.04751	0.0536	0.04834	0.04749	0.0466	0.0469	0.0566	0.0572	0.0658	0.06591	0.06274	0.04299	0.04867	0.04867	0.04903	0.05162
Barbados	0.0141	0.01493	0.01491	0.01571	0.01513	0.01673	0.01784	0.01694	0.01548	0.01668	0.01735	0.01773	0.01797	0.01665	0.01718	0.01747	0.01533	0.01926	0.0199	0.02042	0.0227	0.02185	0.02185	0.02227	0.01492	0.02052	0.01953	0.01762	0.01637	0.0198	0.01856	0.01903	0.01725
Belize	0.0033	0.00302	0.00283	0.00283	0.0031	0.0031	0.00379	0.00306	0.00221	0.0032	0.00453	0.00506	0.00433	0.00401	0.00408	0.00469	0.00392	0.0064	0.0064	0.00649	0.00938	0.01241	0.01184	0.01241	0.01329	0.01402	0.01421	0.0146	0.00754	0.00692	0.00692	0.00693	0.0099
Bolivia	0.04986	0.05158	0.04897	0.04798	0.04649	0.04358	0.04217	0.04126	0.04485	0.04782	0.04934	0.05039	0.05166	0.03983	0.05902	0.06472	0.06705	0.06959	0.07771	0.08924	0.09489	0.09217	0.09659	0.09496	0.10126	0.10235	0.11559	0.11724	0.13069	0.10249	0.10957	0.1149	0.12574
Brazil	2.39586	2.2419	2.17858	2.00237	2.12288	2.20968	2.53166	2.58085	2.6462	2.68286	3.01918	3.05255	3.11839	1.93374	3.44778	3.67861	3.91461	4.17348	4.30391	4.37281	4.39356	4.4907	4.38243	4.21967	4.34496	4.50499	4.68316	4.81742	4.67673	5.08676	5.37299	5.43082	5.65501
Cayman Islands	0.00144	0.00155	0.00155	0.00151	0.00155	0.00159	0.0016	0.00163	0.00382	0.00388	0.00396	0.00422	0.0043	0.00386	0.00445	0.00483	0.00486	0.00487	0.00496	0.00496	0.0049	0.00496	0.00496	0.00514	0.00551	0.00578	0.00657	0.00757	0.00953	0.00774	0.00778	0.00767	0.00675
Chile	0.21675	0.20852	0.20408	0.19271	0.19302	0.19195	0.19434	0.20686	0.22288	0.25425	0.27142	0.29247	0.30365	0.29433	0.36186	0.40077	0.44098	0.46529	0.48624	0.49563	0.47564	0.46877	0.47262	0.47986	0.49829	0.52948	0.55832	0.50737	0.76728	0.68278	0.6555	0.67782	0.70714
Colombia	0.32364	0.32921	0.33787	0.34182	0.34704	0.34348	0.34081	0.36813	0.39709	0.41504	0.39144	0.40622	0.45631	0.41421	0.48388	0.50289	0.55236	0.56872	0.57773	0.55442	0.55478	0.54417	0.52327	0.53299	0.53529	0.54351	0.55362	0.5668	0.55108	0.52154	0.5435	0.57307	0.58356
Costa Rica	0.03363	0.03354	0.03144	0.03345	0.02948	0.0308	0.02802	0.03289	0.03796	0.04096	0.03897	0.0414	0.05159	0.0523	0.05781	0.06507	0.06172	0.06386	0.07154	0.07262	0.07335	0.07629	0.07977	0.08497	0.08395	0.08202	0.09267	0.0988	0.10529	0.09602	0.098	0.09665	0.10637
Cuba	0.44088	0.44913	0.48578	0.4438	0.45975	0.46896	0.48369	0.47485	0.48107	0.48923	0.47826	0.44407	0.39119	0.35715	0.39756	0.40691	0.41554	0.43351	0.42491	0.42729	0.42595	0.44379	0.4423	0.44054	0.49634	0.43018	0.33487	0.34362	0.29995	0.36414	0.35411	0.39744	0.36915
Dominica	0.00038	0.00051	0.00051	0.00051	0.00051	0.00058	0.00058	0.00063	0.0008	0.00084	0.00084	0.00084	0.00084	0.00084	0.00102	0.00115	0.00115	0.00115	0.0012	0.0012	0.00116	0.00147	0.0016	0.00174	0.00154	0.00133	0.00168	0.00172	0.00193	0.00184	0.00184	0.00201	0.00189
Dominican Republic	0.08055	0.07718	0.08253	0.09945	0.08695	0.08948	0.09847	0.10951	0.12196	0.12066	0.13389	0.1296	0.13549	0.11038	0.13896	0.15032	0.16055	0.17212	0.17648	0.20038	0.22369	0.23181	0.23726	0.23522	0.23025	0.23132	0.23354	0.23726	0.25942	0.2238	0.22367	0.23774	0.24298
Ecuador	0.17345	0.18231	0.19908	0.17534	0.16968	0.17611	0.18853	0.18454	0.18968	0.18276	0.19726	0.21144	0.24268	0.19045	0.24298	0.24994	0.26195	0.2722	0.27986	0.25855	0.26128	0.28113	0.28458	0.29284	0.30527	0.32067	0.35026	0.36009	0.46623	0.42209	0.45672	0.4357	0.42896
El Salvador	0.02922	0.02539	0.02416	0.02685	0.02719	0.02846	0.0311	0.03049	0.03325	0.03249	0.03429	0.03972	0.04573	0.04076	0.05171	0.06476	0.06216	0.06663	0.07812	0.0787	0.07803	0.08089	0.08085	0.08656	0.08533	0.08825	0.08954	0.09066	0.08887	0.08625	0.08637	0.08999	0.09035
Falkland Islands (Islas Malvinas)	0.00017	0.00017	0.00017	0.00017	0.00017	0.00022	0.00022	0.00022	0.00043	0.00039	0.00035	0.00035	0.00035	0.00035	0.00035	0.00039	0.00044	0.00048	0.00039	0.00039	0.00039	0.00039	0.00044	0.00044	0.00048	0.00052	0.00057	0.00065	0.00066	0.00065	0.00065	0.00063	0.00063
French Guiana	0.00515	0.00443	0.00565	0.00581	0.00463	0.00465	0.00542	0.00598	0.00706	0.00796	0.00951	0.01075	0.00861	0.01128	0.01169	0.01332	0.01329	0.01332	0.01355	0.01355	0.01369	0.01373	0.0141	0.01472	0.01425	0.01484	0.01498	0.01442	0.01317	0.01146	0.01365	0.01472	0.01426
Grenada	0.00067	0.00077	0.00085	0.00083	0.00085	0.00088	0.00098	0.00102	0.00111	0.00115	0.00178	0.00178	0.00183	0.00181	0.00237	0.00221	0.00244	0.00308	0.00278	0.00278	0.00181	0.00318	0.00345	0.00349	0.00352	0.00361	0.00381	0.00377	0.00419	0.00398	0.00397	0.00396	0.00626
Guadeloupe	0.00707	0.0101	0.01275	0.01339	0.01483	0.01341	0.01347	0.01536	0.01681	0.01884	0.02032	0.02128	0.01974	0.02111	0.02366	0.02428	0.02404	0.02445	0.02445	0.02445	0.02581	0.02628	0.02672	0.02777	0.02835	0.02976	0.03126	0.03483	0.03599	0.03042	0.03042	0.03109	0.03307
Guatemala	0.06067	0.05249	0.05229	0.05392	0.04719	0.05296	0.04689	0.04715	0.05158	0.05238	0.05511	0.05253	0.06282	0.06094	0.07829	0.08508	0.0895	0.0991	0.11976	0.1217	0.12093	0.13481	0.13204	0.13279	0.1378	0.14329	0.14335	0.15013	0.14133	0.15527	0.1427	0.16117	0.16236
Guyana	0.02137	0.02429	0.0195	0.01721	0.01968	0.02	0.01927	0.01465	0.01456	0.00972	0.00936	0.0108	0.01227	0.01513	0.01545	0.01318	0.0141	0.01547	0.01964	0.0209	0.0229	0.02354	0.02393	0.02341	0.02101	0.02313	0.022	0.02186	0.02265	0.02256	0.02244	0.02297	0.02272
Haiti	0.01262	0.00844	0.01053	0.00838	0.00842	0.00998	0.01066	0.01732	0.01883	0.01753	0.00996	0.00986	0.01127	0.00819	0.00761	0.01306	0.01544	0.01983	0.01852	0.02071	0.02122	0.02312	0.0239	0.02381	0.02428	0.02457	0.02519	0.02757	0.03519	0.03139	0.02926	0.02903	0.0291
Honduras	0.02516	0.02226	0.02267	0.02417	0.02479	0.02317	0.02429	0.02451	0.02748	0.03352	0.03777	0.03704	0.03805	0.03663	0.04225	0.04794	0.05301	0.05307	0.06068	0.06399	0.05867	0.06914	0.07641	0.07692	0.08893	0.09327	0.0976	0.1079	0.10329	0.09235	0.0973	0.10072	0.13521
Jamaica	0.11624	0.09773	0.08462	0.09024	0.07405	0.0664	0.06652	0.07147	0.08281	0.09396	0.09982	0.10334	0.11176	0.10886	0.11794	0.13063	0.13313	0.14109	0.14435	0.14815	0.1428	0.14414	0.14702	0.15269	0.15396	0.14867	0.16807	0.17696	0.17045	0.12416	0.12297	0.12807	0.16819
Martinique	0.00934	0.00919	0.00917	0.00906	0.00813	0.00979	0.01053	0.01194	0.01429	0.02028	0.02189	0.01806	0.02012	0.02504	0.02706	0.02766	0.02769	0.02772	0.02777	0.02777	0.02815	0.02841	0.02879	0.03002	0.03085	0.03264	0.03257	0.0338	0.03041	0.03603	0.03608	0.03845	0.03908
Montserrat	0.00026	0.00028	0.00028	0.00028	0.00028	0.00031	0.00031	0.00035	0.0004	0.0004	0.00053	0.00049	0.00057	0.00057	0.00057	0.00066	0.00062	0.00066	0.00071	0.00071	0.00075	0.00075	0.00075	0.00084	0.00092	0.00097	0.00106	0.00115	0.00121	0.00115	0.00115	0.00122	0.00122
Netherlands Antilles	0.23781	0.22241	0.21486	0.19761	0.18614	0.15532	0.1517	0.15405	0.14343	0.15139	0.14774	0.14015	0.13817	0.11234	0.14497	0.15282	0.15243	0.16181	0.16155	0.15593	0.15562	0.15753	0.15079	0.14447	0.14518	0.15288	0.16006	0.16834	0.18474	0.17282	0.16378	0.16203	0.15789
Nicaragua	0.02719	0.02808	0.02827	0.02694	0.02567	0.02923	0.02928	0.02921	0.02994	0.02948	0.02816	0.02684	0.0322	0.02877	0.03446	0.03751	0.03959	0.04161	0.04764	0.05102	0.05116	0.05454	0.05396	0.05433	0.05733	0.06027	0.05973	0.06181	0.05943	0.05942	0.05906	0.06284	0.06915
Panama	0.17304	0.17082	0.16306	0.1675	0.16528	0.1438	0.14794	0.15484	0.15048	0.14706	0.15605	0.156	0.1599	0.15025	0.17773	0.18907	0.15953	0.16799	0.18477	0.1716	0.16945	0.17627	0.1673	0.16859	0.1896	0.18324	0.188	0.19326	0.11033	0.21037	0.23259	0.22704	0.2142
Paraguay	0.02044	0.01892	0.01844	0.01945	0.02119	0.02138	0.0222	0.02818	0.0264	0.03388	0.0324	0.02987	0.0336	0.03187	0.0416	0.04696	0.03878	0.04254	0.0486	0.05477	0.05108	0.04934	0.05142	0.05337	0.05339	0.05267	0.05288	0.05353	0.05963	0.05862	0.06334	0.0568	0.05501
Peru	0.28145	0.28741	0.28371	0.2593	0.26641	0.26132	0.28377	0.28963	0.29576	0.25272	0.25231	0.23411	0.24784	0.23005	0.27541	0.29753	0.31964	0.32679	0.33104	0.33457	0.32717	0.32055	0.31644	0.31909	0.33873	0.32778	0.372	0.33362	0.3956	0.37791	0.38293	0.36212	0.34164
Puerto Rico	0.42549	0.44884	0.32998	0.31502	0.35528	0.3063	0.32878	0.34028	0.30792	0.30157	0.29308	0.36671	0.32709	0.3025	0.34996	0.35755	0.3683	0.37884	0.38803	0.32173	0.4221	0.44972	0.44589	0.45608	0.47056	0.45332	0.44787	0.35918	0.37174	0.32615	0.37126	0.32063	0.32199
Saint Kitts and Nevis	0.00075	0.00079	0.00091	0.00074	0.00075	0.00075	0.00075	0.00079	0.00092	0.00092	0.00092	0.00106	0.00105	0.00118	0.00141	0.00128	0.00145	0.00145	0.00145	0.00145	0.00145	0.00145	0.00145	0.00163	0.00179	0.00189	0.00249	0.00354	0.0036	0.00372	0.00372	0.00375	0.00344
Saint Lucia	0.00164	0.0013	0.00155	0.00143	0.00143	0.00176	0.00177	0.00198	0.00242	0.00243	0.00243	0.00243	0.00251	0.00229	0.00278	0.00283	0.00282	0.00296	0.00296	0.00296	0.00471	0.00494	0.00504	0.00552	0.00533	0.00532	0.00548	0.00577	0.00632	0.00587	0.00587	0.00604	0.00599
Saint Vincent/Grenadines	0.00055	0.00051	0.00055	0.00055	0.00051	0.00057	0.00058	0.00062	0.00076	0.00111	0.00116	0.00111	0.0012	0.00101	0.00178	0.00187	0.00187	0.00199	0.00239	0.00239	0.00243	0.00248	0.00261	0.00275	0.00291	0.00291	0.00287	0.00292	0.00313	0.00291	0.00291	0.00296	0.00397
Suriname	0.03138	0.02698	0.02386	0.01716	0.01453	0.01838	0.01815	0.0157	0.01723	0.01879	0.02236	0.02069	0.01962	0.01918	0.02024	0.02075	0.02032	0.02092	0.02112	0.02112	0.02203	0.02325	0.02446	0.02505	0.02599	0.02675	0.02753	0.02719	0.02711	0.02795	0.02741	0.02974	0.03084
Trinidad and Tobago	0.08922	0.08228	0.06103	0.05203	0.05001	0.04817	0.04672	0.04149	0.03655	0.04253	0.04098	0.04277	0.04469	0.03609	0.05008	0.04495	0.04243	0.04571	0.0441	0.04635	0.0502	0.05843	0.05761	0.06529	0.06757	0.07262	0.07577	0.07661	0.08785	0.07642	0.07544	0.08212	0.08969
Turks and Caicos Islands	0	0	0	0	0	0	0	0	0	0	0	0	0	0	0	0.00019	0.00019	0.00019	0.00021	0.00021	0.00039	0.00023	0.00018	0.00018	0.00017	0.00018	0.00017	0.001	0.00221	0.00226	0.00226	0.00213	0.00211
Uruguay	0.08576	0.07711	0.07304	0.05765	0.05464	0.05089	0.04915	0.05686	0.0705	0.06835	0.0657	0.06201	0.06662	0.06262	0.06711	0.0645	0.0698	0.07643	0.09202	0.10108	0.0901	0.0698	0.0772	0.07662	0.081	0.08429	0.09885	0.09476	0.12624	0.12495	0.11658	0.11468	0.10433
Venezuela	0.81449	0.87913	0.86222	0.79955	0.77827	0.77043	0.81549	0.81596	0.79693	0.77981	0.7938	0.80666	0.82576	0.6141	0.8687	0.88472	0.87611	0.89765	0.90585	0.90617	0.98505	1.07648	1.1386	1.08159	1.09324	1.16647	1.2608	1.37341	1.82942	1.34857	1.43221	1.50562	1.51658
Virgin Islands, U.S.	0.24982	0.22395	0.16259	0.1143	0.13365	0.1496	0.09966	0.11733	0.08209	0.12507	0.11384	0.1152	0.11539	0.07763	0.11498	0.11489	0.11382	0.11657	0.12104	0.29979	0.13205	0.19195	0.19075	0.22458	0.23458	0.22889	0.23891	0.21603	0.2298	0.2232	0.22814	0.27736	0.30636
Virgin Islands, British	0.00032	0.00051	0.00051	0.00051	0.00047	0.00048	0.00053	0.00062	0.00066	0.0007	0.0007	0.0007	0.00075	0.00075	0.00075	0.00075	0.00084	0.00084	0.00084	0.00084	0.00084	0.00084	0.00084	0.00097	0.00123	0.00132	0.00141	0.00153	0.00166	0.00157	0.00157	0.00163	0.00222
Europe	33.95602	31.09793	30.00463	29.12506	28.91723	28.73469	29.56812	29.77811	30.22253	30.21539	30.477	30.63576	31.18315	30.6494	31.08504	31.80658	32.61536	32.76421	33.38756	33.08773	33.23512	33.41837	33.48843	33.74249	34.35041	34.00424	34.05575	34.37765	33.40668	31.69597	31.50473	30.92037	29.57564
Albania	0.09846	0.09377	0.0916	0.0931	0.09209	0.08877	0.08203	0.07291	0.06889	0.05827	0.04319	0.03858	0.04407	0.02184	0.02797	0.03124	0.0247	0.02577	0.03096	0.03804	0.04429	0.04739	0.05049	0.05697	0.0596	0.0646	0.06547	0.06511	0.06362	0.05646	0.05246	0.05679	0.05642
Austria	0.49389	0.47551	0.44082	0.43447	0.42507	0.41456	0.4317	0.43745	0.42747	0.42624	0.4523	0.48655	0.47695	0.48927	0.48488	0.48489	0.53203	0.53187	0.55671	0.5287	0.5316	0.56494	0.57885	0.61099	0.62658	0.63308	0.63216	0.61978	0.59208	0.56644	0.5799	0.5485	0.53591
Belgium	1.11557	1.02073	0.94555	0.8607	0.8125	0.85179	0.95946	0.96332	0.99512	0.97439	0.97805	1.05019	1.07554	1.0554	1.16613	1.15902	1.25595	1.29118	1.31584	1.25405	1.28616	1.2895	1.31202	1.39676	1.40782	1.41247	1.3502	1.35474	1.53559	1.34018	1.32244	1.36876	1.34598
Bosnia and Herzegovina	NA	NA	NA	NA	NA	NA	NA	NA	NA	NA	NA	NA	0.07414	0.04034	0.04139	0.0402	0.03878	0.03893	0.04377	0.04508	0.04024	0.04035	0.04211	0.04554	0.05194	0.05419	0.05357	0.05457	0.05781	0.05764	0.05855	0.05736	0.0595
Bulgaria	0.66442	0.637	0.63925	0.63801	0.6384	0.63144	0.62182	0.5986	0.6021	0.50566	0.41369	0.26036	0.27724	0.21176	0.27005	0.27742	0.24897	0.22598	0.218	0.20482	0.21068	0.2114	0.21696	0.2089	0.21397	0.23407	0.23658	0.23282	0.2226	0.20709	0.20897	0.21277	0.23302
Croatia	NA	NA	NA	NA	NA	NA	NA	NA	NA	NA	NA	NA	0.13849	0.11894	0.16667	0.18889	0.16638	0.17126	0.19153	0.19436	0.17985	0.18141	0.19	0.19431	0.20106	0.20162	0.21468	0.20444	0.20207	0.18842	0.16961	0.18852	0.19151
Cyprus	0.04202	0.03622	0.03868	0.04296	0.04306	0.04536	0.04746	0.05139	0.0525	0.06405	0.06761	0.068	0.08085	0.07197	0.09211	0.092	0.09026	0.09172	0.09919	0.10449	0.10187	0.11083	0.10929	0.11021	0.11615	0.11849	0.12484	0.12528	0.12788	0.12392	0.11961	0.12393	0.1283
Czech Republic	NA	NA	NA	NA	NA	NA	NA	NA	NA	NA	NA	NA	NA	0.3248	0.33297	0.34885	0.35972	0.34927	0.36215	0.3588	0.36023	0.37816	0.37233	0.39682	0.43678	0.4505	0.43544	0.44689	0.43647	0.4232	0.40352	0.41021	0.41038
Denmark	0.61929	0.51642	0.48611	0.46082	0.4574	0.47109	0.46454	0.44948	0.42934	0.41116	0.40227	0.40632	0.40263	0.41695	0.44318	0.46751	0.49405	0.4745	0.46551	0.45879	0.43908	0.44527	0.41078	0.39216	0.38615	0.38156	0.39757	0.40325	0.37825	0.34597	0.34853	0.33339	0.32987
Faroe Islands	0.00612	NA	NA	NA	0	0	0.00713	0.0075	0.00784	0.00856	0.00918	0.00843	0.00841	0.00817	0.00855	0.00899	0.00921	0.00925	0.0093	0.0093	0.00945	0.00944	0.00951	0.0096	0.00967	0.00978	0.01058	0.01012	0.01031	0.01029	0.01011	0.01085	0.01058
Finland	0.58248	0.51593	0.47162	0.44216	0.45559	0.433	0.47153	0.48671	0.48536	0.47886	0.47193	0.47413	0.47356	0.4444	0.46064	0.42428	0.42559	0.42547	0.43862	0.44137	0.4226	0.41897	0.44085	0.46426	0.46507	0.45586	0.46179	0.48081	0.45285	0.42527	0.45022	0.42416	0.40029
Former Czechoslovakia	0.77453	0.759	0.70679	0.68789	0.65056	0.64228	0.6347	0.63659	0.6041	0.66244	0.61844	0.51309	0.51063	NA	NA	NA	NA	NA	NA	NA	NA	NA	NA	NA	NA	NA	NA	NA	NA	NA	NA	NA	NA
Former Serbia and Montenegro	NA	NA	NA	NA	NA	NA	NA	NA	NA	NA	NA	NA	0.11951	0.04964	0.0698	0.05831	0.10529	0.14239	0.13277	0.12091	0.13111	0.17078	0.17468	0.1769	0.17521	0.17717	NA	NA	NA	NA	NA	NA	NA
Former Yugoslavia	0.64593	0.60317	0.60413	0.56783	0.68664	0.70029	0.64691	0.66523	0.67163	0.66183	0.67678	0.53405	NA	NA	NA	NA	NA	NA	NA	NA	NA	NA	NA	NA	NA	NA	NA	NA	NA	NA	NA	NA	NA
France	4.72075	4.1926	3.90627	3.78784	3.65466	3.5995	3.61882	3.65765	3.69618	3.7776	3.74807	3.98932	4.10266	3.85777	3.83077	3.95894	4.13448	4.06314	4.22017	4.18869	4.24181	4.23878	4.09147	4.13523	4.26248	4.12036	4.11587	4.18712	4.03012	3.86398	3.82679	3.68343	3.57426
Germany	NA	NA	NA	NA	NA	NA	NA	NA	NA	NA	NA	5.83028	5.8705	5.99204	5.93679	5.93629	6.0355	6.00835	6.02476	5.84603	5.86921	5.93929	5.73396	5.63234	5.62027	5.47299	5.57122	5.112	5.27581	5.06507	5.15551	4.95962	4.83105
Germany, East	0.80496	0.75664	0.7908	0.7141	0.59451	0.65526	0.61392	0.62531	0.62937	0.62638	0.61913	NA	NA	NA	NA	NA	NA	NA	NA	NA	NA	NA	NA	NA	NA	NA	NA	NA	NA	NA	NA	NA	NA
Germany, West	5.67394	5.11355	4.93621	4.82655	4.7202	4.8422	5.18146	5.00599	5.01325	4.68946	4.90424	NA	NA	NA	NA	NA	NA	NA	NA	NA	NA	NA	NA	NA	NA	NA	NA	NA	NA	NA	NA	NA	NA
Gibraltar	0.00738	0.00827	0.00736	0.00581	0.0054	0.01246	0.01868	0.01898	0.02451	0.02105	0.02185	0.02253	0.03988	0.04069	0.04172	0.04181	0.04186	0.04181	0.04825	0.04203	0.09355	0.05126	0.05216	0.0535	0.05489	0.05644	0.05775	0.05952	0.05728	0.06265	0.06368	0.06089	0.05055
Greece	0.56432	0.54093	0.50842	0.4917	0.49305	0.51212	0.52101	0.56585	0.59229	0.63057	0.66439	0.66757	0.68366	0.70275	0.71751	0.74911	0.77679	0.7866	0.82498	0.80515	0.84276	0.85367	0.85857	0.9011	0.88436	0.89673	0.9395	0.95179	0.90308	0.84427	0.77219	0.71924	0.65603
Hungary	0.51592	0.49732	0.46853	0.46845	0.42158	0.43281	0.4086	0.41659	0.3796	0.37933	0.36785	0.34106	0.34362	0.33685	0.33946	0.32365	0.30218	0.31014	0.32417	0.30931	0.29646	0.28472	0.28719	0.27645	0.27803	0.31487	0.33275	0.34043	0.32495	0.31972	0.29845	0.28744	0.26219
Iceland	0.02348	0.02129	0.02111	0.02129	0.02333	0.02309	0.02309	0.02509	0.02517	0.02718	0.02928	0.02714	0.02944	0.0315	0.03149	0.03147	0.03571	0.0357	0.0377	0.03759	0.03815	0.03654	0.03774	0.03825	0.03977	0.04035	0.04183	0.04498	0.04183	0.03726	0.03649	0.04341	0.043
Ireland	0.25355	0.21866	0.19124	0.17216	0.17754	0.17482	0.20841	0.18585	0.16549	0.17097	0.19091	0.20626	0.2111	0.21673	0.2383	0.24422	0.25523	0.28019	0.31419	0.35253	0.35616	0.38126	0.37367	0.36713	0.37882	0.39845	0.41985	0.41048	0.39655	0.33596	0.32994	0.29955	0.27071
Italy	4.11569	3.99298	3.79702	3.72486	3.64483	3.59795	3.65472	3.82319	3.86041	3.9951	3.92963	3.89437	3.98368	3.95586	3.90804	4.06024	4.01868	4.03719	4.05297	3.92504	3.85978	3.80111	3.8922	3.8703	3.87976	3.63792	3.62091	3.65714	3.46312	3.18603	3.1459	2.99218	2.69679
Luxembourg	0.04292	0.04492	0.04492	0.04262	0.04298	0.04501	0.04936	0.05594	0.05616	0.06224	0.06835	0.08079	0.08294	0.08278	0.08252	0.07596	0.07819	0.08188	0.08587	0.0921	0.09773	0.10387	0.10654	0.11507	0.12705	0.1369	0.12998	0.12861	0.12732	0.11876	0.12611	0.12795	0.12332
Macedonia	NA	NA	NA	NA	NA	NA	NA	NA	NA	NA	NA	NA	0.04091	0.03916	0.03825	0.03904	0.04921	0.0446	0.04743	0.04198	0.04674	0.03905	0.04251	0.0416	0.04107	0.0415	0.04101	0.0423	0.03971	0.03961	0.03832	0.03918	0.03523
Malta	0.01885	0.02054	0.02148	0.01449	0.01998	0.01272	0.01714	0.01879	0.02006	0.02096	0.02255	0.0246	0.02667	0.0276	0.03091	0.03278	0.03497	0.03735	0.03905	0.04454	0.03919	0.0329	0.03939	0.03925	0.03973	0.04122	0.03904	0.04138	0.0776	0.08782	0.10436	0.10018	0.08745
Montenegro	NA	NA	NA	NA	NA	NA	NA	NA	NA	NA	NA	NA	NA	NA	NA	NA	NA	NA	NA	NA	NA	NA	NA	NA	NA	NA	0.00615	0.00694	0.00778	0.00829	0.00562	0.00766	0.00909
Netherlands	1.66696	1.51454	1.33092	1.25967	1.20222	1.2435	1.38537	1.41585	1.50298	1.48156	1.5156	1.56797	1.59881	1.58919	1.5939	1.59837	1.59419	1.65209	1.66939	1.72758	1.78943	1.87472	1.88117	1.94342	2.01074	2.16078	2.11361	2.35094	2.1598	2.04718	2.05461	2.05633	2.03247
Norway	0.40638	0.37251	0.33316	0.3284	0.37641	0.39269	0.40553	0.40432	0.39002	0.37941	0.3933	0.37267	0.37551	0.38439	0.39586	0.41148	0.43929	0.43855	0.44054	0.44473	0.42113	0.42983	0.42706	0.44492	0.45719	0.45845	0.50074	0.49019	0.43985	0.43796	0.45166	0.50399	0.50656
Poland	0.81456	0.72526	0.66384	0.67553	0.66078	0.66666	0.69491	0.71356	0.71464	0.7214	0.5919	0.56255	0.58023	0.60599	0.62524	0.6503	0.7392	0.79598	0.82258	0.86137	0.83673	0.81795	0.81747	0.86258	0.96338	0.94031	1.00077	1.10143	1.07352	1.08004	1.14129	1.16241	1.08034
Portugal	0.3233	0.28885	0.38951	0.39183	0.40576	0.37792	0.41124	0.40015	0.42375	0.52314	0.52374	0.52432	0.58325	0.54943	0.55682	0.59889	0.57579	0.60874	0.67188	0.69689	0.6886	0.68978	0.71053	0.6723	0.67906	0.71277	0.62583	0.65247	0.59558	0.56659	0.57176	0.53513	0.47928
Romania	0.80276	0.7403	0.72711	0.67976	0.65364	0.68842	0.69318	0.72963	0.70779	0.7377	0.82703	0.59571	0.5344	0.42921	0.47518	0.52129	0.54842	0.57894	0.53055	0.45532	0.47322	0.4822	0.48802	0.45871	0.46809	0.45734	0.4468	0.45877	0.48992	0.4089	0.39627	0.44448	0.44311
Serbia	NA	NA	NA	NA	NA	NA	NA	NA	NA	NA	NA	NA	NA	NA	NA	NA	NA	NA	NA	NA	NA	NA	NA	NA	NA	NA	0.18316	0.18619	0.16281	0.16474	0.16974	0.16429	0.1623
Slovakia	NA	NA	NA	NA	NA	NA	NA	NA	NA	NA	NA	NA	NA	0.13555	0.13725	0.1364	0.14354	0.15508	0.15501	0.14173	0.13905	0.15054	0.17533	0.15862	0.15876	0.16608	0.162	0.17623	0.17656	0.16545	0.17244	0.17323	0.15377
Slovenia	NA	NA	NA	NA	NA	NA	NA	NA	NA	NA	NA	NA	0.0738	0.07655	0.08633	0.09688	0.11204	0.1142	0.10924	0.10907	0.10611	0.10562	0.10364	0.10557	0.10711	0.11357	0.11406	0.11652	0.1344	0.11201	0.11002	0.11274	0.11039
Spain	2.09057	1.97622	2.11488	2.12264	1.77399	1.7746	1.79168	1.84808	2.03536	2.02894	2.0849	2.20237	2.28872	2.17567	2.30604	2.46617	2.48851	2.62784	2.82131	2.9098	3.0403	3.15709	3.15167	3.22946	3.2984	3.3691	3.32951	3.40843	3.25502	3.08008	3.0228	2.90249	2.70392
Sweden	1.13543	1.00783	0.85596	0.77202	0.72417	0.74766	0.77445	0.75471	0.72385	0.688	0.6863	0.6916	0.7577	0.7469	0.79978	0.79687	0.85345	0.80376	0.82478	0.81343	0.74446	0.75063	0.7521	0.75155	0.75161	0.72603	0.7148	0.74122	0.68024	0.64809	0.71006	0.63939	0.60879
Switzerland	0.64147	0.51886	0.48892	0.53489	0.51422	0.56066	0.56134	0.54261	0.54534	0.53724	0.54866	0.5711	0.57908	0.54592	0.53761	0.54677	0.55586	0.54648	0.57175	0.57517	0.55996	0.56527	0.54535	0.55106	0.57216	0.55495	0.55332	0.54718	0.54866	0.53152	0.49518	0.52684	0.53246
Turkey	0.66742	0.59441	0.68927	0.71899	0.72205	0.75515	0.81275	0.92185	0.90768	0.92926	0.98598	0.96006	1.01621	1.16224	1.11261	1.2473	1.30315	1.28556	1.27392	1.26733	1.3368	1.24598	1.33466	1.30991	1.34023	1.32368	1.37236	1.45931	1.37417	1.41496	1.30085	1.39132	1.34917
United Kingdom	3.62273	3.29372	3.29317	3.14351	3.82463	3.34091	3.35518	3.27894	3.46428	3.53643	3.61988	3.66379	3.69836	3.71114	3.69829	3.66076	3.74817	3.65244	3.61272	3.64162	3.56063	3.51786	3.67816	3.72073	3.78744	3.67007	3.64007	3.70824	3.49149	3.32412	3.28077	3.25177	3.07166
Eurasia	18.73349	18.70248	18.9782	18.69518	18.66323	18.67408	19.08999	19.13391	18.82319	18.29559	17.5356	17.44659	14.42679	10.07425	10.21173	9.69733	8.47408	8.17729	7.98405	7.75496	7.77748	7.81993	7.89589	8.04813	8.28157	8.49402	7.23831	8.3228	8.80882	8.35936	8.39249	8.80415	9.25586
Armenia	NA	NA	NA	NA	NA	NA	NA	NA	NA	NA	NA	NA	0.09494	0.04995	0.03811	0.05261	0.05963	0.06531	0.06784	0.06964	0.07504	0.07831	0.08144	0.08407	0.0865	0.09312	0.09468	0.09775	0.0997	0.09568	0.09736	0.10045	0.09875
Azerbaijan	NA	NA	NA	NA	NA	NA	NA	NA	NA	NA	NA	NA	0.42777	0.33439	0.39456	0.38114	0.28498	0.27713	0.31824	0.32379	0.29346	0.25795	0.23717	0.23472	0.23993	0.2438	0.256	0.22951	0.17907	0.16349	0.15924	0.17334	0.17399
Belarus	NA	NA	NA	NA	NA	NA	NA	NA	NA	NA	NA	NA	0.79379	0.56232	0.51555	0.48909	0.44022	0.39559	0.36187	0.31668	0.29439	0.27425	0.2596	0.2999	0.33097	0.35996	0.36482	0.37089	0.33365	0.3804	0.31665	0.3906	0.38981
Estonia	NA	NA	NA	NA	NA	NA	NA	NA	NA	NA	NA	NA	0.05324	0.05369	0.05388	0.0531	0.05323	0.05743	0.05901	0.05161	0.04773	0.04909	0.04891	0.05059	0.05769	0.05919	0.05725	0.06032	0.0513	0.05235	0.0488	0.05457	0.05805
Former U.S.S.R.	18.73349	18.70248	18.9782	18.69518	18.66323	18.67408	19.08999	19.13391	18.82319	18.29559	17.5356	17.44659	NA	NA	NA	NA	NA	NA	NA	NA	NA	NA	NA	NA	NA	NA	NA	NA	NA	NA	NA	NA	NA
Georgia	NA	NA	NA	NA	NA	NA	NA	NA	NA	NA	NA	NA	0.0579	0.02658	0.0156	0.01664	0.02936	0.03114	0.03189	0.03524	0.03225	0.02512	0.02408	0.02459	0.02583	0.02992	0.03224	0.03659	0.04002	0.03968	0.04218	0.03996	0.03401
Kazakhstan	NA	NA	NA	NA	NA	NA	NA	NA	NA	NA	NA	NA	0.85366	0.61772	0.62317	0.56258	0.51015	0.4585	0.41438	0.36338	0.41168	0.43548	0.44521	0.42266	0.45582	0.4706	0.48156	0.49192	0.52504	0.42644	0.41822	0.43784	0.50816
Kyrgyzstan	NA	NA	NA	NA	NA	NA	NA	NA	NA	NA	NA	NA	0.06765	0.03816	0.0181	0.0239	0.02558	0.02155	0.02879	0.02382	0.02172	0.01908	0.02058	0.01937	0.0247	0.02785	0.02769	0.02928	0.05441	0.07131	0.06823	0.07114	0.06991
Latvia	NA	NA	NA	NA	NA	NA	NA	NA	NA	NA	NA	NA	0.11084	0.08112	0.08487	0.08884	0.10027	0.07465	0.07467	0.0647	0.05981	0.06188	0.05846	0.06169	0.06678	0.07245	0.07788	0.07208	0.07581	0.06718	0.06592	0.07252	0.06716
Lithuania	NA	NA	NA	NA	NA	NA	NA	NA	NA	NA	NA	NA	0.17986	0.14389	0.16988	0.15795	0.1398	0.14088	0.15005	0.12847	0.11594	0.11134	0.10821	0.10402	0.11046	0.1385	0.14902	0.15369	0.14356	0.11508	0.11507	0.12117	0.14678
Moldova	NA	NA	NA	NA	NA	NA	NA	NA	NA	NA	NA	NA	0.12306	0.0869	0.04815	0.04671	0.04139	0.03827	0.03172	0.02029	0.01927	0.02104	0.02386	0.02561	0.02835	0.02889	0.02902	0.0308	0.03301	0.02866	0.03384	0.03391	0.03922
Russia	NA	NA	NA	NA	NA	NA	NA	NA	NA	NA	NA	NA	9.3246	6.48471	6.67586	6.27107	5.52033	5.38464	5.22418	5.30158	5.38857	5.35359	5.43545	5.51211	5.61968	5.68663	4.36687	5.43714	6.16469	5.93777	6.01929	6.25649	6.5393
Tajikistan	NA	NA	NA	NA	NA	NA	NA	NA	NA	NA	NA	NA	0.04101	0.02922	0.02456	0.02679	0.0311	0.03377	0.03944	0.0428	0.04682	0.04895	0.04991	0.05389	0.05758	0.06193	0.0661	0.07732	0.02285	0.02178	0.02474	0.02944	0.03033
Turkmenistan	NA	NA	NA	NA	NA	NA	NA	NA	NA	NA	NA	NA	0.15906	0.11656	0.12744	0.12696	0.12596	0.14068	0.12298	0.11279	0.13087	0.15359	0.16288	0.18233	0.19837	0.20055	0.19909	0.20869	0.18762	0.17527	0.20224	0.2171	0.24049
Ukraine	NA	NA	NA	NA	NA	NA	NA	NA	NA	NA	NA	NA	1.73712	1.11871	1.05999	1.01161	0.80802	0.76444	0.75185	0.58793	0.53713	0.62379	0.6283	0.65998	0.66445	0.7212	0.74704	0.72803	0.71621	0.59139	0.58172	0.60343	0.64116
Uzbekistan	NA	NA	NA	NA	NA	NA	NA	NA	NA	NA	NA	NA	0.40229	0.33032	0.36199	0.38833	0.30405	0.29332	0.30715	0.31226	0.30279	0.30648	0.31183	0.31261	0.31447	0.29942	0.28904	0.29878	0.18188	0.19289	0.199	0.2022	0.21875
Middle East	4.33648	4.65476	4.9319	5.50141	5.63378	5.94041	6.28085	6.4365	6.65012	6.87478	7.21194	7.32797	7.77476	6.54906	8.45994	8.50105	8.65928	9.10021	9.34665	9.50121	9.78129	10.13265	10.46186	10.86381	11.36562	11.94981	12.52101	12.09826	13.73572	13.92522	14.29756	15.12007	15.87042
Bahrain	0.03282	0.03223	0.03183	0.03134	0.03232	0.03321	0.03232	0.03854	0.03857	0.03954	0.04171	0.04318	0.04407	0.03186	0.04342	0.04367	0.04147	0.04048	0.0452	0.0455	0.04787	0.04814	0.04784	0.05203	0.05833	0.06147	0.08054	0.08879	0.09079	0.09314	0.09693	0.10096	0.09803
Iran	1.25242	1.23886	1.39553	1.67001	1.62019	1.65887	1.75874	1.83785	1.84934	2.0451	2.11957	2.26508	2.28367	2.10527	2.3726	2.39278	2.34199	2.56026	2.53424	2.50897	2.5856	2.67519	2.80381	2.94627	3.05784	3.19875	3.3822	3.43871	3.69508	3.66513	3.57821	3.52341	3.54291
Iraq	0.45199	0.45174	0.43093	0.52568	0.51089	0.53612	0.58841	0.59583	0.66779	0.72656	0.83076	0.55603	0.72596	0.74423	0.97952	1.00756	0.99906	0.92262	0.94098	0.95002	0.96155	1.02574	1.05181	0.96713	1.05099	1.12303	1.09259	1.19294	1.24096	1.36581	1.38633	1.5077	1.57311
Israel	0.34619	0.35246	0.3473	0.32206	0.30626	0.27491	0.28278	0.30156	0.33531	0.34816	0.34977	0.36811	0.42764	0.34937	0.42563	0.44162	0.44908	0.49174	0.48612	0.50256	0.53929	0.5786	0.51969	0.52653	0.50053	0.53485	0.51652	0.53047	0.46989	0.4761	0.50471	0.53745	0.6164
Jordan	0.07704	0.09157	0.10455	0.11201	0.11582	0.12035	0.13005	0.14122	0.13145	0.13194	0.14053	0.13217	0.15431	0.13256	0.1726	0.18012	0.19412	0.18643	0.20339	0.20175	0.21287	0.20799	0.21744	0.22326	0.22278	0.2334	0.22303	0.21279	0.20474	0.19808	0.2186	0.23232	0.22329
Kuwait	0.22542	0.24744	0.24543	0.25867	0.25593	0.2561	0.25146	0.24143	0.25144	0.26149	0.17834	0.19698	0.25192	0.21336	0.35233	0.37104	0.40549	0.45524	0.51288	0.54121	0.55467	0.56835	0.59181	0.62399	0.64833	0.70372	0.68611	0.69033	0.69011	0.80401	0.82877	0.88631	0.8359
Lebanon	0.09504	0.08772	0.08654	0.09091	0.08727	0.10118	0.09617	0.09961	0.09047	0.07098	0.067	0.1125	0.11294	0.12961	0.15843	0.16926	0.17616	0.20336	0.20768	0.21699	0.2195	0.21232	0.21319	0.21689	0.21108	0.20113	0.17873	0.16467	0.21776	0.26631	0.24879	0.27696	0.21674
Oman	0.03535	0.03418	0.04065	0.04337	0.05114	0.06115	0.06148	0.05506	0.05389	0.06522	0.07992	0.08014	0.08206	0.07715	0.0834	0.08868	0.09722	0.10155	0.10427	0.11093	0.10905	0.1125	0.11843	0.12033	0.13359	0.15013	0.1633	0.18988	0.25804	0.21943	0.23375	0.25321	0.29829
Palestinian Territories	NA	NA	NA	NA	NA	NA	NA	NA	NA	NA	NA	NA	NA	NA	NA	NA	NA	0.00582	0.00902	0.00977	0.01198	0.01944	0.01672	0.01853	0.03142	0.03957	0.04294	0.04365	0.03271	0.03166	0.03166	0.03877	0.0451
Qatar	0.02165	0.03746	0.04268	0.04096	0.04964	0.04323	0.05366	0.05486	0.05132	0.05291	0.05354	0.05369	0.05527	0.03552	0.05941	0.06374	0.07196	0.07244	0.07576	0.078	0.08792	0.09762	0.1163	0.13291	0.14955	0.15268	0.18117	0.21853	0.35118	0.25871	0.24924	0.32341	0.38353
Saudi Arabia	1.31361	1.43432	1.51721	1.68547	1.81761	1.96053	2.08278	2.08177	2.10766	2.02464	2.21978	2.31593	2.40645	1.58176	2.50651	2.4192	2.57587	2.68916	2.81207	2.894	3.01105	3.15352	3.28705	3.54055	3.7792	3.95933	4.19947	3.50402	4.20002	4.39937	4.69131	5.18316	5.91252
Syria	0.23149	0.25307	0.25612	0.29646	0.32515	0.34574	0.34583	0.38415	0.4066	0.41994	0.4356	0.37367	0.38812	0.39264	0.47807	0.48355	0.48936	0.51366	0.52977	0.54302	0.54208	0.53732	0.54351	0.54685	0.54339	0.54652	0.54817	0.56186	0.65669	0.66668	0.66653	0.67115	0.54038
United Arab Emirates	0.15737	0.29592	0.31857	0.32034	0.32946	0.40236	0.456	0.46439	0.52242	0.5339	0.53516	0.66452	0.66969	0.62701	0.69032	0.68996	0.66491	0.6988	0.71454	0.7196	0.70418	0.69018	0.70837	0.7041	0.73227	0.78844	0.94576	1.00616	1.31531	1.20537	1.29747	1.32212	1.30714
Yemen	0.09609	0.09778	0.11456	0.10413	0.13211	0.14669	0.14115	0.14022	0.14387	0.15439	0.16025	0.16598	0.17264	0.12871	0.13769	0.14988	0.15258	0.15864	0.17072	0.17888	0.19367	0.20573	0.22587	0.24444	0.2463	0.25679	0.28046	0.25545	0.31243	0.27542	0.26526	0.26313	0.27708
Africa	3.08541	3.29646	3.46378	3.54129	3.68611	3.80042	3.79927	3.83463	3.97829	4.12837	4.32234	4.40535	4.47881	3.88692	4.5483	4.67476	4.79648	4.92505	4.97906	5.07184	5.13941	5.32552	5.474	5.58026	5.78245	6.09026	6.21948	6.37432	6.66395	6.62286	6.85077	6.76732	6.93254
Algeria	0.23841	0.24773	0.27955	0.26447	0.30546	0.32001	0.31898	0.32511	0.33433	0.35723	0.38154	0.40967	0.41249	0.2829	0.40051	0.40067	0.38851	0.38556	0.39996	0.37947	0.39994	0.42081	0.43743	0.44491	0.46413	0.49543	0.49676	0.53518	0.60729	0.63469	0.63625	0.64947	0.64565
Angola	0.04304	0.04327	0.04506	0.04738	0.0411	0.0532	0.05237	0.0518	0.05298	0.05355	0.05247	0.05443	0.05585	0.0511	0.05398	0.05771	0.05418	0.06334	0.05277	0.06443	0.06065	0.0893	0.09297	0.09863	0.09953	0.10226	0.11524	0.13187	0.14732	0.15408	0.17869	0.18003	0.1921
Benin	0.00619	0.00616	0.00412	0.00624	0.00614	0.0073	0.00708	0.00541	0.00658	0.00705	0.00824	0.00948	0.0106	0.01163	0.01226	0.01341	0.0144	0.01574	0.01698	0.0185	0.02297	0.02304	0.02443	0.02874	0.03358	0.03521	0.04185	0.04565	0.05035	0.06285	0.07043	0.07292	0.06409
Botswana	0.00619	0.00617	0.00404	0.00404	0.00426	0.0077	0.00728	0.00869	0.00956	0.01151	0.01285	0.01439	0.01672	0.01454	0.0164	0.0164	0.0164	0.01862	0.01881	0.01881	0.02754	0.02291	0.02193	0.02193	0.02676	0.0288	0.03015	0.03092	0.04043	0.03675	0.03872	0.04	0.03091
Burkina Faso	0.00613	0.00617	0.00618	0.00621	0.00621	0.00591	0.00692	0.00722	0.00738	0.0066	0.00696	0.00798	0.00801	0.00818	0.00943	0.00943	0.00971	0.01588	0.01482	0.01482	0.01563	0.01585	0.01627	0.01681	0.01699	0.01735	0.01735	0.0193	0.02842	0.02386	0.02431	0.02453	0.02058
Burundi	0.00144	0.00164	0.00144	0.00166	0.00207	0.00215	0.00209	0.00217	0.0036	0.00394	0.00431	0.00484	0.00462	0.00303	0.00541	0.00528	0.00535	0.00541	0.0055	0.0055	0.00548	0.00582	0.00587	0.00609	0.00556	0.00545	0.00527	0.00474	0.0028	0.00295	0.00294	0.00283	0.00459
Cameroon	0.0331	0.03343	0.03925	0.03914	0.03915	0.0399	0.04589	0.0425	0.0406	0.05008	0.05053	0.05097	0.05164	0.0327	0.04708	0.04822	0.04664	0.04871	0.04853	0.04443	0.04653	0.04612	0.04603	0.0481	0.04785	0.04843	0.05349	0.0599	0.06512	0.06835	0.07559	0.07252	0.06114
Cape Verde	0.00454	0.00453	0.002	0.00196	0.00239	0.00236	0.0008	0.00089	0.00128	0.00137	0.00146	0.0015	0.00159	0.00135	0.00172	0.00168	0.00177	0.00177	0.00177	0.00177	0.0031	0.00208	0.00222	0.00222	0.00427	0.00367	0.00413	0.00486	0.00511	0.00545	0.00545	0.00556	0.00553
Central African Republic	0.00205	0.00266	0.00287	0.00308	0.00291	0.00295	0.00348	0.00314	0.00335	0.00318	0.00345	0.00362	0.0037	0.00379	0.00402	0.00401	0.00406	0.00416	0.00424	0.00424	0.00454	0.00464	0.00482	0.00482	0.00453	0.00432	0.00454	0.00498	0.00526	0.00477	0.00477	0.00473	0.00607
Chad	0.00407	0.00389	0.00389	0.00389	0.00186	0.00222	0.00399	0.00348	0.00232	0.00238	0.00493	0.00461	0.00464	0.00194	0.00248	0.00247	0.00255	0.00257	0.00257	0.00257	0.00278	0.00284	0.00293	0.00293	0.00272	0.00302	0.00325	0.00379	0.00372	0.00364	0.00364	0.00373	0.00384
Comoros	0.00061	0.00061	0.00061	0.00061	0.00062	0.00053	0.00053	0.00085	0.00089	0.00089	0.00116	0.00112	0.00112	0.00088	0.00116	0.00116	0.00116	0.00116	0.00121	0.00121	0.00134	0.00138	0.00143	0.00143	0.00146	0.00156	0.00159	0.00199	0.00214	0.00209	0.00181	0.00207	0.00217
Congo (Brazzaville)	0.01047	0.01245	0.01028	0.00807	0.00846	0.01188	0.01149	0.01296	0.01157	0.01296	0.01418	0.01246	0.01209	0.00899	0.01088	0.01074	0.01039	0.01033	0.01046	0.0086	0.00916	0.01172	0.01004	0.01253	0.01383	0.01557	0.01689	0.0186	0.02116	0.02405	0.02792	0.02667	0.02435
Congo (Kinshasa)	0.04055	0.04297	0.04505	0.04469	0.04095	0.03962	0.04342	0.0388	0.0488	0.04576	0.04257	0.04504	0.0511	0.04894	0.04101	0.04262	0.04423	0.04295	0.04061	0.03517	0.02926	0.0197	0.01666	0.01675	0.02344	0.024	0.02333	0.02639	0.0244	0.02355	0.0302	0.02464	0.01998
Cote dIvoire (IvoryCoast)	0.05991	0.06331	0.05829	0.06265	0.06159	0.06307	0.06627	0.07391	0.07783	0.07771	0.06429	0.05288	0.05304	0.05192	0.06275	0.06147	0.0642	0.05739	0.05491	0.06232	0.06926	0.04559	0.04761	0.04735	0.05548	0.05684	0.05574	0.05046	0.06009	0.0534	0.0557	0.05661	0.04779
Djibouti	0.02205	0.0177	0.01779	0.01314	0.01096	0.01082	0.00974	0.00996	0.00973	0.02304	0.02326	0.02353	0.02359	0.02266	0.02427	0.02416	0.02416	0.0245	0.0245	0.0245	0.02465	0.02502	0.02506	0.02559	0.0259	0.02565	0.02374	0.02319	0.0169	0.01667	0.01667	0.01859	0.02399
Egypt	0.55156	0.63445	0.68013	0.79837	0.86936	0.91694	0.92084	0.94353	0.93298	0.94354	0.99365	0.97358	0.94448	0.81141	0.96691	0.98589	1.07382	1.13783	1.18687	1.19773	1.15478	1.1317	1.17183	1.1715	1.25672	1.29556	1.35429	1.41643	1.48647	1.44199	1.47859	1.57756	1.62567
Equatorial Guinea	0.00083	0.00082	0.00104	0.00103	0.00104	0.00118	0.00119	0.00114	0.00114	0.00166	0.00171	0.00179	0.0017	0.00179	0.00184	0.00183	0.00188	0.00201	0.00201	0.00201	0.0032	0.00241	0.00241	0.0025	0.00213	0.00222	0.00232	0.0036	0.01102	0.00646	0.01085	0.00809	0.00499
Eritrea	NA	NA	NA	NA	NA	NA	NA	NA	NA	NA	NA	NA	NA	NA	0.01373	0.0152	0.01553	0.01573	0.01684	0.01421	0.00887	0.01051	0.00976	0.01102	0.01036	0.01035	0.01033	0.00971	0.0058	0.00712	0.00699	0.00645	0.01005
Ethiopia	0.02518	0.02531	0.02803	0.03223	0.03142	0.03773	0.03593	0.04095	0.03935	0.04171	0.0419	0.03454	0.04994	0.04263	0.03018	0.03298	0.02426	0.02433	0.0359	0.04467	0.04783	0.04918	0.05412	0.05822	0.06017	0.06292	0.07102	0.07865	0.09969	0.096	0.08897	0.09879	0.11372
Gabon	0.02317	0.02554	0.02309	0.03022	0.02547	0.02273	0.0207	0.02208	0.0247	0.03343	0.03289	0.0332	0.03448	0.02952	0.03288	0.02995	0.03174	0.03379	0.03229	0.02777	0.02571	0.02619	0.02526	0.02645	0.02668	0.02658	0.0293	0.03266	0.04166	0.03045	0.03468	0.02936	0.03322
Gambia, The	0.00224	0.00223	0.00223	0.00223	0.00246	0.00242	0.00225	0.0026	0.00269	0.00265	0.00271	0.00282	0.00282	0.00299	0.00331	0.00309	0.00308	0.00309	0.00327	0.00327	0.00365	0.00392	0.00401	0.00406	0.00408	0.00423	0.00453	0.00559	0.00609	0.00623	0.00677	0.00599	0.0065
Ghana	0.03273	0.02872	0.03269	0.02926	0.03346	0.028	0.03293	0.03779	0.04449	0.04983	0.04204	0.04159	0.04663	0.04332	0.05372	0.05547	0.05659	0.0537	0.05491	0.06379	0.0754	0.07379	0.0785	0.0849	0.09183	0.09304	0.09539	0.09615	0.09413	0.10789	0.13028	0.13082	0.1287
Guinea	0.0122	0.01195	0.01217	0.01212	0.01244	0.01071	0.01429	0.01504	0.0154	0.01488	0.02006	0.01555	0.01593	0.01489	0.01683	0.01668	0.01682	0.01687	0.01696	0.01696	0.01761	0.0178	0.01793	0.01802	0.01813	0.01869	0.01854	0.01817	0.01903	0.01941	0.01941	0.01922	0.01863
Guinea-Bissau	0.00123	0.00123	0.00125	0.00125	0.00168	0.00181	0.00142	0.00262	0.00293	0.00307	0.00388	0.00397	0.004	0.00343	0.00437	0.00432	0.00436	0.00437	0.00437	0.00437	0.00485	0.0049	0.00508	0.00521	0.00518	0.00538	0.00533	0.00551	0.00547	0.00557	0.00557	0.00565	0.00622
Kenya	0.08526	0.08257	0.08238	0.07763	0.07566	0.0776	0.08291	0.07312	0.08085	0.08735	0.08801	0.07693	0.08506	0.081	0.09229	0.09693	0.10081	0.0933	0.10745	0.10937	0.11885	0.10895	0.10744	0.1139	0.12369	0.13758	0.15278	0.15211	0.14387	0.15785	0.16676	0.16917	0.17011
Lesotho	0.00212	0.00192	0.00212	0.00212	0.00212	0.00219	0.0022	0.0022	0.0015	0.0022	0.0022	0.0022	0.00224	0.00215	0.00246	0.00246	0.00246	0.00246	0.00249	0.00249	0.0029	0.0029	0.0029	0.0029	0.00289	0.0031	0.00321	0.00354	0.00385	0.00321	0.00757	0.00612	0.00369
Liberia	0.02841	0.02609	0.02612	0.02605	0.02348	0.02349	0.01788	0.01326	0.01722	0.01361	0.00814	0.00476	0.00483	0.0049	0.00533	0.00533	0.00553	0.00559	0.00577	0.00577	0.00616	0.00652	0.00705	0.00727	0.00735	0.00745	0.00858	0.00942	0.00857	0.00775	0.00753	0.00826	0.00753
Libya	0.20894	0.2423	0.26173	0.26349	0.25644	0.27134	0.26602	0.2839	0.30007	0.30827	0.32676	0.34883	0.31415	0.26622	0.34916	0.37387	0.39151	0.41598	0.39168	0.40087	0.43761	0.4678	0.49067	0.50865	0.53868	0.56184	0.56223	0.5667	0.5466	0.56233	0.59362	0.27529	0.36075
Madagascar	0.01713	0.01458	0.01252	0.0165	0.01646	0.01819	0.01216	0.01746	0.01933	0.01362	0.01312	0.01363	0.01465	0.01385	0.01694	0.0176	0.01764	0.01783	0.01792	0.01792	0.02516	0.02764	0.03185	0.03297	0.03617	0.03471	0.03444	0.03452	0.02901	0.02532	0.0256	0.02507	0.03959
Malawi	0.00618	0.00722	0.0059	0.0049	0.00472	0.00554	0.00545	0.0054	0.0054	0.00687	0.00718	0.0092	0.00915	0.00806	0.00955	0.01	0.01016	0.01018	0.01027	0.01027	0.01072	0.01092	0.01105	0.01109	0.01279	0.01378	0.01427	0.01476	0.01529	0.01242	0.01242	0.0123	0.02547
Mali	0.00618	0.00822	0.00616	0.00613	0.00615	0.00675	0.0051	0.00601	0.00311	0.00659	0.00656	0.00678	0.00689	0.00705	0.00726	0.00726	0.00741	0.00756	0.00765	0.00765	0.00785	0.00787	0.00862	0.0087	0.00896	0.00995	0.00902	0.00924	0.00969	0.00964	0.00964	0.01025	0.01067
Mauritania	0.00878	0.00851	0.00851	0.00844	0.0126	0.0125	0.00709	0.0098	0.01269	0.01483	0.01314	0.01388	0.0456	0.03888	0.04679	0.04752	0.0478	0.04821	0.04843	0.04843	0.04943	0.04941	0.04714	0.04837	0.04107	0.04859	0.04155	0.03824	0.02733	0.02677	0.02677	0.02508	0.03756
Mauritius	0.01278	0.01139	0.01101	0.01213	0.01211	0.0123	0.01518	0.01304	0.01909	0.02158	0.02488	0.02522	0.03019	0.02776	0.03058	0.03261	0.03322	0.03372	0.03403	0.03403	0.0417	0.04549	0.04107	0.04299	0.04454	0.04561	0.04633	0.04799	0.04829	0.04289	0.04361	0.04568	0.05196
Morocco	0.18703	0.17995	0.18417	0.18587	0.17833	0.18759	0.19585	0.19041	0.20391	0.22948	0.24147	0.24193	0.26943	0.22712	0.30466	0.2895	0.28026	0.29523	0.29015	0.32096	0.31911	0.32304	0.32785	0.33325	0.33934	0.34565	0.36048	0.3656	0.45754	0.46541	0.48268	0.47494	0.40797
Mozambique	0.02825	0.02377	0.02775	0.02795	0.02571	0.02818	0.01387	0.01426	0.02124	0.01678	0.01475	0.01452	0.01435	0.01402	0.01355	0.01494	0.01477	0.0153	0.01586	0.01642	0.01628	0.01953	0.02203	0.02335	0.02761	0.02771	0.02824	0.02963	0.02804	0.03107	0.03319	0.03495	0.04443
Namibia	NA	NA	NA	NA	NA	NA	NA	NA	NA	NA	0.03235	0.01587	0.01505	0.01472	0.01762	0.01762	0.01848	0.01954	0.02089	0.02409	0.02554	0.03059	0.03134	0.03389	0.03572	0.03605	0.03886	0.04088	0.04325	0.04468	0.04257	0.04499	0.05138
Niger	0.0083	0.00827	0.00829	0.00622	0.00625	0.00625	0.0052	0.00498	0.00866	0.00881	0.00915	0.00924	0.00949	0.00956	0.00995	0.00991	0.00993	0.00995	0.00995	0.00995	0.01037	0.01056	0.01105	0.01127	0.01125	0.01128	0.01118	0.01132	0.00706	0.01053	0.01053	0.01026	0.01167
Nigeria	0.34987	0.41162	0.43835	0.41271	0.42653	0.45199	0.4257	0.44635	0.48157	0.50039	0.51517	0.53072	0.54093	0.50439	0.51763	0.58391	0.5908	0.57739	0.53893	0.52517	0.50243	0.62099	0.61566	0.58791	0.55845	0.63109	0.5744	0.54341	0.57092	0.48269	0.48656	0.48214	0.54218
Reunion	0.00881	0.00874	0.00934	0.01096	0.01202	0.01167	0.01152	0.01276	0.0152	0.01655	0.01752	0.02032	0.02098	0.02144	0.02754	0.02728	0.0273	0.02751	0.03505	0.03505	0.03644	0.03812	0.03805	0.03805	0.0386	0.03944	0.04002	0.04043	0.04221	0.04266	0.04266	0.0416	0.04059
Rwanda	0.00223	0.00519	0.00497	0.00568	0.00925	0.00953	0.00936	0.00954	0.00954	0.0099	0.01025	0.01038	0.01066	0.00712	0.00987	0.01003	0.01	0.01017	0.01034	0.01034	0.01089	0.01101	0.01105	0.01119	0.01082	0.01153	0.01178	0.01038	0.01082	0.01097	0.01091	0.01137	0.0109
Saint Helena	0	0.00004	0.00004	0.00004	0.00004	0.00004	0.00004	0.00009	0.00009	0.00009	0.00009	0.00004	0.00004	0.00009	0.00009	0.00009	0.00009	0.00009	0.00009	0.00009	0.00031	0.00018	0.00018	0.00018	0.00013	0.00018	0.00016	0.00018	0.00014	0.00013	0.00013	0.00021	0.00017
Sao Tome and Principe	0.00047	0.00047	0.00047	0.00047	0.00047	0.00048	0.00049	0.00049	0.00049	0.00049	0.00097	0.00102	0.00106	0.00101	0.0011	0.0011	0.0011	0.0011	0.0011	0.0011	0.00128	0.00128	0.00132	0.00132	0.00132	0.00137	0.0015	0.00184	0.00189	0.00184	0.00185	0.00187	0.00191
Senegal	0.03698	0.03586	0.03666	0.03503	0.04167	0.04088	0.04037	0.04066	0.03474	0.03616	0.03577	0.03308	0.04033	0.03352	0.04963	0.05325	0.05312	0.04928	0.05251	0.05796	0.06154	0.06142	0.06231	0.06292	0.0701	0.07505	0.0771	0.07789	0.0553	0.07518	0.0763	0.07911	0.08769
Seychelles	0.00316	0.00253	0.00234	0.00405	0.00426	0.00437	0.00438	0.00467	0.00647	0.00686	0.0063	0.00678	0.00697	0.0071	0.00725	0.00729	0.00727	0.00782	0.00782	0.00782	0.0081	0.00835	0.01215	0.01185	0.01228	0.01209	0.016	0.01338	0.01469	0.01593	0.01342	0.017	0.01783
Sierra Leone	0.01057	0.01063	0.01141	0.01076	0.01071	0.01167	0.01259	0.01352	0.01472	0.01469	0.01482	0.01553	0.01135	0.00935	0.01052	0.01216	0.01213	0.01243	0.01247	0.01247	0.0132	0.0135	0.01373	0.01405	0.01666	0.01656	0.01655	0.01768	0.02116	0.01936	0.01936	0.02066	0.01886
Somalia	0.01656	0.01929	0.01893	0.0185	0.0192	0.01888	0.02008	0.0149	0.01508	0.01535	0.01402	0.00835	0.00776	0.00767	0.00803	0.00803	0.00803	0.00803	0.00803	0.00803	0.00998	0.00998	0.00998	0.00998	0.00996	0.0101	0.01059	0.01194	0.01159	0.01125	0.01125	0.01041	0.01174
South Africa	0.65894	0.68123	0.7332	0.70469	0.75097	0.7284	0.72725	0.72082	0.71624	0.72892	0.78511	0.83265	0.85053	0.76345	0.84411	0.86304	0.87865	0.89736	0.91889	0.95613	0.9389	0.94019	0.97695	1.00793	1.03042	1.09746	1.13118	1.15506	1.11781	1.09031	1.12804	1.22164	1.25002
Sudan and South Sudan	0.0471	0.04822	0.05269	0.05063	0.04653	0.05199	0.05931	0.0575	0.06239	0.0592	0.05375	0.07716	0.0707	0.05898	0.05887	0.05607	0.05561	0.05749	0.05791	0.06209	0.09081	0.11734	0.12177	0.13689	0.1488	0.15924	0.17815	0.17255	0.19981	0.25739	0.26583	0.26837	0.19284
Swaziland	0.00424	0.00404	0.00404	0.00404	0.00406	0.00455	0.00403	0.00458	0.00495	0.00504	0.00515	0.00569	0.00558	0.00594	0.007	0.007	0.00698	0.007	0.007	0.007	0.00711	0.00711	0.00711	0.00711	0.00709	0.00709	0.00787	0.0094	0.01039	0.00956	0.00956	0.00964	0.00911
Tanzania	0.02872	0.03295	0.03216	0.02853	0.03093	0.03137	0.03807	0.03343	0.03554	0.03474	0.03844	0.03183	0.03494	0.03472	0.03283	0.03193	0.03202	0.03243	0.0327	0.03425	0.03438	0.03977	0.04556	0.04867	0.05185	0.05594	0.05868	0.06329	0.06932	0.07202	0.06435	0.07325	0.0997
Togo	0.00861	0.00795	0.00769	0.00838	0.00991	0.00921	0.00753	0.00705	0.00741	0.00842	0.00836	0.01407	0.00999	0.00695	0.00866	0.00861	0.00867	0.00905	0.00905	0.01395	0.01945	0.014	0.018	0.02964	0.03148	0.03105	0.03218	0.03484	0.01872	0.01857	0.01971	0.02017	0.02264
Tunisia	0.10977	0.12081	0.10959	0.1253	0.12048	0.11468	0.12935	0.10864	0.12696	0.13167	0.1318	0.1427	0.14859	0.1347	0.1551	0.14329	0.15031	0.15982	0.16538	0.16412	0.17261	0.17796	0.18026	0.17918	0.18243	0.18285	0.17876	0.17912	0.19451	0.17492	0.17482	0.18549	0.17807
Uganda	0.01035	0.0066	0.00788	0.00767	0.00785	0.0084	0.00932	0.00792	0.01209	0.0111	0.01187	0.01327	0.01356	0.01266	0.01444	0.01444	0.01435	0.01481	0.01699	0.01699	0.01756	0.01958	0.02044	0.02204	0.02233	0.02341	0.02673	0.02886	0.05081	0.04561	0.0472	0.04722	0.03537
Western Sahara	0.00236	0.00235	0.00264	0.00256	0.00265	0.0027	0.00271	0.00279	0.00283	0.00283	0.00296	0.00296	0.003	0.00281	0.00292	0.00313	0.00313	0.00313	0.00313	0.00313	0.0036	0.00366	0.00366	0.00366	0.00364	0.00412	0.00365	0.00383	0.00361	0.00365	0.00365	0.00364	0.00426
Zambia	0.03309	0.03004	0.02924	0.02906	0.02673	0.02502	0.02506	0.02645	0.02868	0.02805	0.02807	0.02381	0.02722	0.02048	0.02233	0.02274	0.02313	0.02329	0.02453	0.02323	0.02235	0.02445	0.02533	0.02647	0.02752	0.0293	0.03016	0.03067	0.02516	0.02697	0.03015	0.03551	0.04221
Zimbabwe	0.02633	0.0302	0.02447	0.03092	0.03039	0.03157	0.03333	0.03598	0.03573	0.03991	0.04318	0.04844	0.04281	0.0447	0.04711	0.05095	0.05798	0.0622	0.06351	0.06356	0.05205	0.04818	0.04584	0.04191	0.02723	0.03255	0.02848	0.02733	0.02684	0.02574	0.02737	0.02883	0.04319
Asia & Oceania	22.68239	22.3953	21.76158	21.59507	22.55471	22.33841	23.04812	23.86795	25.73731	27.30057	28.71068	30.03292	31.6385	30.34361	35.39541	37.17355	38.86814	40.44403	39.86812	41.85929	42.94275	43.19943	44.17055	46.18486	48.70635	49.78662	50.6727	51.84068	51.49483	53.47516	56.46139	57.7614	59.01451
Afghanistan	0.01462	0.01665	0.0162	0.0221	0.02241	0.02701	0.02843	0.02895	0.02738	0.0279	0.02848	0.02653	0.01484	0.01373	0.01372	0.01309	0.01234	0.01157	0.01099	0.01099	0.00974	0.00968	0.00986	0.00786	0.0085	0.00914	0.00911	0.00932	0.01056	0.07231	0.07231	0.0718	0.0718
American Samoa	0.00593	0.00692	0.00962	0.00603	0.00695	0.00652	0.00673	0.00686	0.00676	0.00776	0.00807	0.00807	0.00827	0.00797	0.00803	0.0079	0.00801	0.00803	0.00803	0.00803	0.00784	0.00786	0.00799	0.00799	0.00795	0.00846	0.00861	0.00922	0.00572	0.00861	0.00417	0.00625	0.00842
Australia	1.21635	1.16711	1.25194	1.2053	1.28951	1.28641	1.29482	1.32628	1.39591	1.45096	1.47281	1.43823	1.45514	1.51093	1.56498	1.60936	1.65518	1.6817	1.68836	1.73718	1.73687	1.7291	1.75075	1.7594	1.93653	1.84876	1.85529	2.06571	1.93496	1.90269	1.91978	2.04498	2.08991
Bangladesh	0.06785	0.07081	0.07379	0.06398	0.06651	0.06873	0.07283	0.07181	0.07568	0.08072	0.07611	0.08077	0.07971	0.07792	0.09744	0.10799	0.11032	0.11863	0.12301	0.14213	0.14518	0.17171	0.17491	0.17677	0.17828	0.18278	0.19168	0.1916	0.19956	0.21242	0.22648	0.23091	0.23855
Bhutan	0.00004	0.00033	0.00044	0.0004	0.00034	0.00044	0.00045	0.00053	0.00052	0.00053	0.00123	0.00123	0.00127	0.00101	0.00146	0.00168	0.00181	0.00185	0.00194	0.00194	0.00198	0.00212	0.00221	0.0023	0.00229	0.00233	0.00234	0.00313	0.00337	0.00404	0.00405	0.00405	0.00353
Brunei	0.00912	0.00991	0.00803	0.00975	0.01093	0.01238	0.01088	0.01241	0.0126	0.01373	0.01441	0.02138	0.01452	0.01564	0.02179	0.02238	0.02594	0.02573	0.02481	0.02422	0.02423	0.02319	0.02301	0.02612	0.02647	0.02864	0.02893	0.03015	0.03467	0.03169	0.03336	0.03278	0.03043
Burma (Myanmar)	0.04824	0.04815	0.0504	0.05864	0.06175	0.06107	0.03614	0.03427	0.03494	0.03488	0.03203	0.03303	0.03462	0.03037	0.03962	0.03834	0.04139	0.05288	0.06241	0.07645	0.07674	0.07031	0.07213	0.07486	0.08377	0.08946	0.0831	0.08271	0.06185	0.05456	0.05396	0.05457	0.0553
Cambodia	0.00404	0.00424	0.00476	0.0052	0.00582	0.00589	0.00612	0.00616	0.0064	0.00638	0.00638	0.00655	0.00674	0.00673	0.0069	0.02041	0.02259	0.02683	0.0315	0.03218	0.03363	0.03947	0.04248	0.04618	0.05158	0.0546	0.05995	0.06463	0.07284	0.06238	0.0552	0.06938	0.0911
China	3.80808	3.66327	3.55887	3.69413	3.75086	4.04448	4.25727	4.51167	4.82176	5.04052	4.86378	5.28738	5.59055	4.78679	6.58761	7.00805	7.46479	8.12371	8.46609	9.01632	9.85521	10.126	10.60977	11.45643	13.15903	13.70719	14.85977	15.30008	15.84112	17.51421	19.09464	20.07662	20.94117
Cook Islands	0.00042	0.00084	0.00082	0.00083	0.00083	0.00083	0.00076	0.00076	0.00076	0.00067	0.00067	0.00056	0.00067	0.00067	0.00067	0.00067	0.00067	0.00067	0.00067	0.00067	0.0008	0.0008	0.0008	0.0008	0.00089	0.00098	0.00103	0.00096	0.00103	0.00101	0.00101	0.00104	0.00209
Fiji	0.01481	0.01536	0.01494	0.01228	0.01105	0.01124	0.01367	0.01081	0.01121	0.01319	0.01423	0.0116	0.01195	0.01094	0.01316	0.01424	0.01476	0.01471	0.01432	0.01596	0.01945	0.02089	0.02502	0.0324	0.03568	0.03534	0.03707	0.03518	0.03048	0.01943	0.01899	0.01855	0.02087
French Polynesia	0.00312	0.00461	0.00624	0.00825	0.01246	0.01083	0.01359	0.01387	0.01375	0.01373	0.01304	0.01286	0.0124	0.01148	0.00981	0.01013	0.0101	0.01013	0.01013	0.01013	0.00954	0.00956	0.00993	0.01203	0.01187	0.01301	0.01413	0.01393	0.01537	0.01479	0.01522	0.01482	0.01482
Guam	0.05329	0.0745	0.05799	0.05546	0.01909	0.0094	0.01564	0.01085	0.01126	0.01071	0.02594	0.02942	0.0351	0.04637	0.06643	0.05038	0.04479	0.05113	0.0422	0.047	0.03928	0.04231	0.02882	0.0331	0.0263	0.02938	0.03058	0.02752	0.02333	0.01457	0.01304	0.01586	0.02506
Hawaiian Trade Zone	0.09468	0.10902	0.10042	0.09487	0.11496	0.1103	0.06534	NA	NA	NA	NA	NA	NA	NA	NA	NA	NA	NA	NA	NA	NA	NA	NA	NA	NA	NA	NA	NA	NA	NA	NA	NA	NA
Hong Kong	0.27275	0.28136	0.27167	0.25693	0.24745	0.23464	0.24286	0.24802	0.26072	0.2638	0.26901	0.28143	0.32101	0.30548	0.38171	0.39385	0.38595	0.39223	0.40661	0.56022	0.51987	0.52095	0.57926	0.58875	0.67637	0.70199	0.67784	0.69938	0.62781	0.75642	0.82471	0.78688	0.62427
India	1.37079	1.55294	1.55938	1.62787	1.73977	1.86769	1.99376	2.07397	2.28833	2.40798	2.44224	2.48668	2.66264	2.18576	2.94401	3.27834	3.48274	3.66835	3.87246	4.20568	4.39542	4.49716	4.70871	4.81656	4.95029	5.11508	5.55147	5.7075	6.0755	6.39516	6.64485	6.85837	6.97637
Indonesia	0.85392	0.94986	1.00201	0.98721	0.98964	0.97143	0.98532	1.03427	1.09668	1.21951	1.36451	1.45472	1.47928	1.47398	1.6188	1.68933	1.78495	1.97198	1.89021	2.0066	2.15618	2.23574	2.33955	2.36933	2.53847	2.63451	2.58706	2.51425	2.60769	2.65579	2.78692	2.72781	2.58382
Japan	10.36103	10.04444	9.3773	8.97486	9.56993	9.04421	9.16818	9.2862	9.93268	10.3095	10.8663	11.02186	11.22052	10.98464	11.55898	11.60174	11.70946	11.58985	11.17498	11.44001	11.21117	10.94818	10.75261	11.48403	11.28289	11.27148	10.52282	10.65607	9.71601	8.84572	8.97575	9.03225	9.53228
Kiribati	0.00034	0.0004	0.0004	0.0004	0.00029	0.00029	0.00026	0.00031	0.00031	0.00031	0.00031	0.00037	0.00031	0.00031	0.00031	0.00031	0.00031	0.00031	0.00031	0.00031	0.00035	0.00035	0.00045	0.00045	0.00045	0.00054	0.00054	0.00057	0.00055	0.00087	0.00087	0.00083	0.00083
Korea, North	0.09996	0.10597	0.1079	0.11845	0.12529	0.13414	0.14183	0.14314	0.13567	0.13383	0.15307	0.16003	0.15436	0.14653	0.14455	0.13113	0.09915	0.08442	0.07429	0.06396	0.05465	0.04868	0.0533	0.05328	0.05206	0.04014	0.03072	0.03596	0.03628	0.02876	0.02749	0.03018	0.03228
Korea, South	1.17736	1.16864	1.15883	1.21237	1.1936	1.17794	1.25518	1.32092	1.57678	1.80984	2.2021	2.65485	3.21145	3.52576	3.85281	4.19978	4.39583	4.7103	3.98289	4.3233	4.43753	4.41895	4.54662	4.60211	4.57173	4.63586	4.61167	4.73989	4.40035	4.47911	4.61099	4.56739	4.64553
Laos	0.00604	0.0024	0.00221	0.00236	0.00217	0.00245	0.00302	0.00306	0.00305	0.00338	0.00338	0.0037	0.00401	0.00302	0.00434	0.00456	0.00486	0.0051	0.00542	0.00542	0.0054	0.00542	0.00564	0.00582	0.0057	0.006	0.0061	0.00612	0.00675	0.00624	0.00624	0.00592	0.00682
Macau	0.00687	0.00653	0.00696	0.00983	0.01076	0.00877	0.01226	0.0137	0.01361	0.01457	0.01477	0.0148	0.01525	0.01576	0.01798	0.01755	0.02025	0.0208	0.02244	0.02382	0.02174	0.02301	0.02519	0.02621	0.03192	0.02738	0.0319	0.03196	0.01757	0.02553	0.02118	0.02521	0.04011
Malaysia	0.34314	0.35283	0.38311	0.4067	0.40965	0.41189	0.40646	0.41244	0.42546	0.45713	0.55456	0.58494	0.62351	0.58487	0.78773	0.82889	0.9057	0.94234	0.92301	0.92186	0.94266	0.96395	0.93371	0.96813	1.02139	1.04785	1.06986	1.09772	1.41938	1.16506	1.18371	1.19677	1.06696
Maldives	0.00021	0.00021	0.00021	0.00021	0.00083	0.0009	0.00114	0.00114	0.00123	0.00123	0.00136	0.00136	0.00141	0.00171	0.00342	0.00483	0.0049	0.00433	0.00468	0.00468	0.00663	0.00713	0.01307	0.0147	0.01027	0.00823	0.01136	0.01279	0.01323	0.01459	0.01459	0.01471	0.01537
Mongolia	0.02519	0.02513	0.02942	0.02936	0.0316	0.03475	0.03506	0.03569	0.0366	0.03414	0.03232	0.03003	0.02718	0.02561	0.02681	0.02373	0.02454	0.01623	0.01715	0.0175	0.01722	0.01991	0.02158	0.02088	0.02479	0.0256	0.02811	0.03128	0.03853	0.03356	0.0355	0.03887	0.04759
Nauru	0.0019	0.00192	0.00192	0.00192	0.00198	0.00197	0.00197	0.00197	0.00196	0.00197	0.00205	0.00205	0.00209	0.00209	0.0021	0.00214	0.00213	0.00214	0.00214	0.00214	0.00213	0.00214	0.00223	0.00223	0.00226	0.00231	0.00226	0.0023	0.00221	0.00237	0.00237	0.00221	0.00221
Nepal	0.00419	0.00418	0.00625	0.00625	0.00628	0.00513	0.00785	0.00851	0.00828	0.0086	0.00837	0.01076	0.01204	0.0121	0.01423	0.0151	0.01889	0.02284	0.02935	0.03156	0.03048	0.03098	0.03136	0.03152	0.0324	0.03355	0.0335	0.03315	0.03659	0.03903	0.04273	0.03895	0.03678
New Caledonia	0.02197	0.02186	0.01513	0.0127	0.01508	0.01363	0.01421	0.01567	0.01457	0.01608	0.01644	0.01795	0.01881	0.01832	0.01835	0.01835	0.01873	0.01878	0.01891	0.01891	0.01869	0.01874	0.02189	0.02189	0.02494	0.02491	0.03032	0.03074	0.02931	0.03172	0.03172	0.0327	0.03129
New Zealand	0.18739	0.17322	0.16637	0.1649	0.17245	0.16527	0.16659	0.18106	0.18976	0.19916	0.2119	0.20536	0.2187	0.21788	0.24089	0.24693	0.24771	0.25514	0.25707	0.26114	0.26711	0.2666	0.2858	0.29896	0.31079	0.31404	0.31876	0.33003	0.32007	0.30817	0.30771	0.30195	0.309
Niue	0.00004	0.00004	0.00004	0.00004	0.00004	0.00004	0.00004	0.00004	0.00004	0.00004	0.00004	0.00004	0.00004	0.00004	0.00004	0.00004	0.00004	0.00004	0.00004	0.00004	0.00004	0.00004	0.00004	0.00004	0.00004	0.00006	0.00007	0.00007	0.00005	0.00005	0.00005	0.00004	0.00004
Pakistan	0.2188	0.23782	0.28087	0.28849	0.29747	0.33894	0.35275	0.38421	0.41263	0.43766	0.46812	0.47189	0.48572	0.51465	0.60879	0.64361	0.7093	0.72094	0.75488	0.80041	0.79502	0.77971	0.77054	0.71714	0.69565	0.71692	0.76322	0.81918	0.82679	0.84007	0.84311	0.89834	0.94585
Papua New Guinea	0.02578	0.02571	0.02571	0.02571	0.02926	0.03077	0.03111	0.03453	0.03223	0.03305	0.03353	0.03324	0.033	0.03237	0.03222	0.03263	0.03255	0.03321	0.03189	0.03189	0.03211	0.0322	0.0473	0.0542	0.05397	0.05411	0.05583	0.05567	0.04188	0.04193	0.04232	0.04252	0.04262
Philippines	0.48068	0.45254	0.44542	0.42257	0.35602	0.3217	0.33852	0.4035	0.41707	0.48921	0.50078	0.49931	0.55262	0.55181	0.63726	0.69461	0.7202	0.771	0.8014	0.77166	0.7319	0.71874	0.69656	0.68646	0.69423	0.69239	0.68096	0.64316	0.6369	0.59883	0.62819	0.64191	0.61404
Samoa	0.00138	0.00146	0.00158	0.00158	0.00206	0.00163	0.00163	0.00163	0.00163	0.00172	0.00181	0.00181	0.00185	0.00185	0.00177	0.0019	0.00189	0.0019	0.0019	0.0019	0.00198	0.00199	0.00207	0.00207	0.00215	0.00229	0.00225	0.00229	0.00239	0.00233	0.00233	0.00223	0.00223
Singapore	0.4419	0.46282	0.49048	0.48734	0.5138	0.49771	0.57183	0.63337	0.67594	0.73237	0.80168	0.85452	0.92793	0.90608	1.11215	1.12973	1.2962	1.3953	1.444	1.4298	1.46618	1.56739	1.54895	1.48499	1.64865	1.78938	1.83558	1.9399	2.13516	2.59286	3.05761	2.76944	2.62672
Solomon Islands	0.00147	0.00208	0.00189	0.00209	0.0021	0.00183	0.00184	0.00212	0.00233	0.00242	0.00247	0.00247	0.00242	0.00223	0.00234	0.00242	0.00242	0.00242	0.00242	0.00242	0.0025	0.00251	0.0026	0.0026	0.00267	0.00294	0.00273	0.00303	0.00304	0.00273	0.003	0.00307	0.00372
Sri Lanka	0.07304	0.07302	0.07505	0.07683	0.08409	0.07022	0.06742	0.07752	0.07248	0.06636	0.07318	0.073	0.07737	0.08006	0.09444	0.10094	0.11266	0.12642	0.12814	0.13756	0.15692	0.15449	0.16067	0.16425	0.16896	0.18242	0.17604	0.18152	0.1816	0.18315	0.17001	0.18725	0.19115
Taiwan	0.8165	0.72572	0.70337	0.71666	0.814	0.7934	0.85595	0.88385	1.02485	1.10818	1.14691	1.15368	1.17104	1.01009	1.39078	1.55996	1.64068	1.63892	1.69912	1.79252	1.82608	1.85194	1.86848	1.94401	1.97063	1.94841	1.99332	1.91505	1.88543	1.91421	2.02506	2.14592	2.24997
Thailand	0.47537	0.45214	0.41563	0.44495	0.48518	0.46981	0.4849	0.53517	0.58463	0.72325	0.84606	0.91241	0.99538	1.03814	1.26342	1.42273	1.56472	1.62813	1.52943	1.52413	1.49151	1.43368	1.56253	1.71541	1.88101	1.96358	1.92565	1.92233	1.54671	1.97612	1.98397	2.00253	1.98097
Timor-Leste (East Timor)	NA	NA	NA	NA	NA	NA	NA	NA	NA	NA	NA	NA	NA	NA	NA	NA	NA	NA	NA	NA	NA	NA	NA	0.0023	0.0025	0.00249	0.00254	0.00462	0.00278	0.00262	0.00262	0.0027	0.00411
Tonga	0.00043	0.00064	0.00059	0.00064	0.00064	0.00066	0.00066	0.00097	0.00115	0.00125	0.00125	0.00142	0.00141	0.00141	0.00165	0.00165	0.00183	0.00188	0.00183	0.00183	0.00187	0.00178	0.00159	0.00159	0.00171	0.00208	0.00246	0.00252	0.00255	0.00252	0.00252	0.00252	0.00261
U.S. Pacific Islands	0.00219	0.00218	0.00218	0.00218	0.00206	0.00186	0.00186	0.00186	0.00255	0.00394	0.00407	0.00407	0.0041	0.00392	0.00403	0.00416	0.00423	0.00416	0.00416	0.00416	0.00415	0.00416	0.00416	0.00416	0.00413	0.00414	0.00424	0.00432	0.00507	0.00424	0.00496	0.00411	0.00398
Vanuatu	0.00172	0.0015	0.00151	0.00147	0.00154	0.00167	0.00167	0.0016	0.00189	0.00168	0.00177	0.00139	0.00092	0.00087	0.00092	0.00092	0.00092	0.00092	0.00092	0.00092	0.00118	0.00118	0.00127	0.00127	0.00131	0.0014	0.00136	0.00158	0.00143	0.00175	0.00175	0.00209	0.00232
Vietnam	0.05092	0.05554	0.05521	0.05647	0.05749	0.05918	0.06088	0.07382	0.08501	0.09847	0.1113	0.11732	0.12828	0.15946	0.17876	0.19864	0.24327	0.26748	0.28301	0.33115	0.36488	0.36996	0.40607	0.44425	0.49392	0.5056	0.51123	0.56173	0.62109	0.59165	0.6452	0.73511	0.78118
Wake Island	0.01857	0.01852	0.01852	0.01852	0.01874	0.01838	0.01843	0.01843	0.01824	0.01829	0.01784	0.01784	0.01806	0.01625	0.01823	0.01841	0.01845	0.01861	0.01861	0.01861	0.0187	0.01875	0.01907	0.01907	0.01896	0.01888	0.01937	0.01986	0.01925	0.01932	0.01916	0.019	0.01843
World	131.13715	125.94329	122.66465	120.84747	123.15327	123.07086	127.22993	129.62379	133.60844	135.3987	136.20666	137.34126	138.00066	128.38885	140.21002	142.50465	145.91268	149.18311	150.56763	153.70102	156.13306	157.08897	158.49345	162.18252	168.64314	170.80914	170.98466	174.22818	172.76647	170.1537	174.86133	176.75903	177.74641
