# Supplementary material
Source: MDPI journal article supplement (https://www.mdpi.com/1099-4300/15/12/5565)
Supplement: s2 [file s2 › Sources/data/README.txt]

These files were produced from the files downloaded from the EIA website, which can be found in "Raw Data/". They have blank lines, formatting, and footnotes removed, and are formatted as R-readable CSV files.
