# Supplementary material
Source: MDPI journal article supplement (https://www.mdpi.com/1099-4300/15/12/5565)
Supplement: s2 [file s2 › Sources/data/Total Carbon Dioxide Emissions.csv]

Region	1980	1981	1982	1983	1984	1985	1986	1987	1988	1989	1990	1991	1992	1993	1994	1995	1996	1997	1998	1999	2000	2001	2002	2003	2004	2005	2006	2007	2008	2009	2010	2011
Bermuda	0.5307	0.45967	0.48832	0.51577	0.50344	0.4955	0.50418	0.70882	0.77465	0.94282	0.65741	0.54808	0.44851	0.52483	0.51374	0.51203	0.52149	0.52145	0.52137	0.52137	0.52154	0.51983	0.52142	0.56133	0.60643	0.64892	0.64298	0.7509	0.75025	0.71151	0.69942	0.77688
Canada	457.44874	442.08622	423.27299	410.64391	433.61916	443.67063	427.81623	445.22693	478.05217	492.56658	470.58682	465.79226	484.97641	485.45761	495.32436	508.73546	519.98921	544.90879	549.30107	566.38246	573.27294	561.87924	567.56001	597.00393	611.56609	623.75023	598.27896	593.08964	578.24831	549.6838	546.652	552.55652
Greenland	NA	NA	NA	NA	NA	NA	NA	NA	NA	NA	NA	NA	0.50022	0.51692	0.52169	0.52156	0.52932	0.54054	0.54834	0.54834	0.56108	0.57697	0.58335	0.58648	0.59469	0.60237	0.61509	0.59981	0.6417	0.64787	0.64841	0.61108
Mexico	240.33395	266.51208	282.14251	260.786	279.13982	280.69545	267.49163	277.67817	276.85223	290.77436	302.15757	309.80196	313.35086	316.82733	336.39201	321.37354	332.65784	349.40034	371.30731	363.38467	382.8967	379.55289	379.07998	387.95956	378.02696	397.80578	436.95375	444.27026	452.79369	421.12377	432.21004	462.29292
Saint Pierre and Miquelon	0.1471	0.14746	0.13447	0.14806	0.14387	0.12674	0.17244	0.22284	0.23302	0.26553	0.26089	0.24788	0.23208	0.12718	0.13038	0.08584	0.08584	0.0604	0.06992	0.06992	0.07628	0.06993	0.06993	0.07628	0.08263	0.08264	0.08581	0.08914	0.09159	0.08899	0.08899	0.09143
United States	4775.81592	4647.05158	4411.26362	4388.78248	4619.15004	4605.15078	4613.11946	4770.89728	4990.51426	5071.65267	5040.36546	4997.43132	5093.4143	5187.98136	5261.18882	5319.05226	5504.41276	5577.49934	5616.57041	5677.92308	5863.26039	5754.55339	5799.08834	5853.03341	5974.22721	5999.24483	5924.2944	6026.28366	5844.58234	5435.27927	5636.73918	5490.63123
Antarctica	0.14064	0.14025	0.14626	0.14025	0.18242	0.20066	0.19826	0.20455	0.21084	0.2077	0.21084	0.22028	0.22251	0.22251	0.22251	0.22887	0.22887	0.22887	0.22887	0.22887	0.22887	0.23204	0.23204	0.2384	0.2384	0.2543	0.2543	0.24476	0.26439	0.24476	0.07208	0.13689
Antigua and Barbuda	0.40738	0.3631	0.48629	0.28797	0.32287	0.30874	0.32274	0.39148	0.39549	0.40406	0.42269	0.41483	0.41885	0.44124	0.46346	0.47592	0.47577	0.49494	0.49485	0.49485	0.51092	0.51252	0.51417	0.54611	0.59272	0.64686	0.65485	0.631	0.65897	0.66632	0.66584	0.73159
Argentina	92.83647	90.17526	96.45015	98.21476	103.81951	97.45315	103.52606	110.10799	111.65903	112.50867	102.66202	108.85161	109.9067	119.85321	116.52484	119.7916	130.1098	130.31604	136.05663	140.08034	138.37738	128.3394	121.1751	134.1638	140.8498	151.86401	157.28161	168.93684	171.47596	170.49399	174.39296	190.60526
Aruba	NA	NA	NA	NA	NA	NA	0.10793	0.10793	0.42118	0.55699	0.5941	0.63341	0.68587	0.70362	0.75001	0.87273	0.57391	0.91418	0.92199	0.92199	0.95775	0.95768	0.9577	1.01689	1.02815	1.04849	1.13017	1.04743	1.07222	1.03984	1.03984	1.23696
Bahamas, The	3.99007	4.26559	3.61972	2.71191	2.45503	2.22598	2.41417	2.67455	2.44508	2.80694	2.98911	2.58066	2.22062	2.32305	2.68113	3.17928	3.57796	3.54117	4.04494	3.62272	3.50107	3.42356	3.42089	4.18647	4.25074	4.91423	4.9047	4.66166	5.07692	3.60306	3.60306	4.73401
Barbados	0.96807	1.02751	1.02151	1.07832	1.03956	1.14641	1.29527	1.22225	1.16025	1.2484	1.3016	1.31138	1.34995	1.35547	1.27218	1.33596	1.05111	1.44435	1.47581	1.51249	1.7058	1.64932	1.64973	1.68089	1.15756	1.52851	1.48817	1.3733	1.49191	1.51017	1.40965	1.44169
Belize	0.2255	0.20645	0.19291	0.19482	0.21137	0.21131	0.263	0.20872	0.1509	0.2187	0.31315	0.34972	0.304	0.30071	0.28482	0.32932	0.27119	0.43918	0.43891	0.44527	0.65973	0.86332	0.80791	0.84879	0.90596	0.96631	0.96806	1.0286	1.03903	0.46869	0.46837	0.5363
Bolivia	4.4629	4.65224	4.07695	4.49	4.25214	3.78484	3.84292	3.72856	4.17724	4.79929	5.06781	4.92727	6.23804	6.74878	8.14745	7.65578	7.28746	7.96358	7.56175	8.74322	9.25638	8.03854	9.36866	11.69947	11.73129	11.56087	12.80602	12.96387	14.00281	13.00468	13.25838	13.97625
Brazil	185.66367	175.21839	172.75154	163.79696	180.86806	192.66065	212.67353	219.15879	221.45606	226.76497	237.3323	245.68986	237.39937	257.96524	269.07749	289.087	306.68349	325.44934	324.11373	335.70944	344.43385	348.51074	346.62242	345.79962	355.72934	370.75669	383.84982	401.17222	427.40226	406.96665	450.95104	475.40926
Cayman Islands	0.0978	0.10546	0.1055	0.10254	0.10581	0.10871	0.11004	0.10918	0.26593	0.26988	0.27439	0.29461	0.3025	0.28641	0.31201	0.3378	0.34018	0.34016	0.34644	0.34644	0.34331	0.34648	0.34654	0.35924	0.38617	0.40687	0.46243	0.52843	0.48557	0.55311	0.55628	0.59276
Chile	23.85294	23.1508	19.59177	19.89573	20.65083	20.51285	19.22896	20.38658	23.91289	29.60889	31.86602	30.51929	31.54843	33.39626	36.74883	40.15477	45.45543	53.81151	54.19755	59.47247	54.62238	54.07724	52.87728	56.77913	63.28417	67.05095	69.9084	61.01757	66.72527	73.85196	79.1952	80.09632
Colombia	39.65804	40.97204	41.76567	42.93036	45.64042	45.25294	45.1298	42.6768	47.18324	47.61717	41.42489	47.8433	53.64514	55.09216	53.83455	54.01478	56.88716	62.79487	64.34943	57.73747	57.6946	56.51785	55.40834	57.11188	55.83843	60.09254	61.06586	60.46089	63.13901	63.4801	65.9582	71.15371
Costa Rica	2.26757	2.26251	2.11982	2.25348	1.97356	2.08542	1.99355	2.31773	2.71692	2.88596	2.73905	2.89316	3.64487	3.97534	4.03476	4.7159	4.46911	4.47627	5.00066	5.13568	5.00516	5.22245	5.3884	5.95484	5.72251	5.65277	6.63534	7.22005	7.13781	6.92894	7.02554	6.80576
Cuba	29.94117	30.50222	33.0496	30.17521	31.31601	31.993	34.97136	34.42399	35.09755	36.27357	35.38048	32.5274	28.87321	28.61741	29.12096	30.84337	30.23656	33.52561	32.6025	33.3105	32.86064	33.25693	34.11084	33.24364	33.14369	28.58831	25.21778	26.3714	29.10583	29.27082	28.33751	28.41043
Dominica	0.02679	0.03498	0.03502	0.03498	0.03501	0.03991	0.04022	0.04337	0.05548	0.05862	0.05852	0.05845	0.05909	0.06224	0.07183	0.08101	0.08119	0.08116	0.0843	0.0843	0.07958	0.10183	0.11139	0.12085	0.10804	0.0924	0.11758	0.12125	0.12709	0.12966	0.12966	0.14157
Dominican Republic	5.43528	5.22474	5.58116	6.74508	5.91215	6.62825	6.86647	8.07931	8.55454	8.15095	9.06125	9.22165	10.33956	9.1879	9.88486	11.02003	11.61553	12.23681	12.67698	14.36058	15.79765	16.58673	17.13948	19.54484	18.11529	17.43891	18.43152	19.15992	19.39686	18.20188	18.6675	20.63968
Ecuador	12.78431	13.43936	14.57806	12.91322	12.80618	13.5287	14.77932	13.59615	14.64614	13.92833	15.08754	15.87544	18.39283	16.61748	17.99938	19.28722	19.73366	20.15552	21.4527	19.56457	20.08079	21.52018	21.7254	22.42992	23.52884	24.65449	26.55117	26.51204	27.1163	30.4128	32.70106	29.13192
El Salvador	1.9921	1.7285	1.65117	1.82891	1.84834	1.93666	2.18682	2.15943	2.31694	2.22631	2.39073	2.75258	3.2204	3.23388	3.62436	4.65097	4.39066	4.68446	5.48114	5.48183	5.5092	5.7021	5.76625	6.07921	6.02339	6.21059	6.23474	6.32433	5.93183	5.93246	5.91636	6.71283
Falkland Islands (Islas Malvinas)	0.01168	0.01151	0.01151	0.01151	0.01154	0.01442	0.01598	0.01598	0.03171	0.02833	0.02519	0.02519	0.02544	0.02544	0.02545	0.02861	0.03178	0.03496	0.0286	0.0286	0.0286	0.0286	0.03178	0.03177	0.03505	0.03813	0.04129	0.04768	0.04578	0.04764	0.04764	0.04574
French Guiana	0.34991	0.30226	0.38439	0.39059	0.31189	0.31388	0.38459	0.4336	0.51416	0.57669	0.68492	0.77451	0.63251	0.86881	0.86885	0.96838	0.96818	0.96812	0.98408	0.98408	0.9969	0.99689	1.02068	1.06565	1.0394	1.06083	1.11547	1.07343	1.05598	0.82375	0.98675	1.06401
Grenada	0.04574	0.05254	0.05828	0.05632	0.05836	0.05954	0.06935	0.07109	0.07745	0.08059	0.12319	0.12305	0.12746	0.14013	0.16393	0.15434	0.16752	0.21036	0.19063	0.19063	0.11806	0.20108	0.2335	0.23815	0.24205	0.2478	0.26042	0.26138	0.28688	0.27073	0.26951	0.26896
Guadeloupe	0.48529	0.68799	0.87326	0.91835	1.01304	0.9263	0.93736	1.09392	1.20193	1.33446	1.44216	1.51019	1.38962	1.61957	1.66579	1.7088	1.69541	1.71627	1.71586	1.71586	1.80679	1.83416	1.86624	1.93692	1.99515	2.07825	2.19169	2.47748	2.35198	2.12595	2.12595	2.46248
Guatemala	4.15611	3.61168	3.53147	3.66336	3.21584	3.62142	3.22797	3.23943	3.50631	3.5813	3.78412	3.57455	4.35516	4.79358	5.44291	6.07474	6.31484	6.95524	8.4839	8.69116	9.05973	10.00747	10.26778	10.39179	10.634	11.08866	11.1551	11.77265	10.98563	11.85292	11.35854	11.70734
Guyana	1.42148	1.63947	1.3226	1.17089	1.3369	1.35217	1.3968	1.06234	1.05352	0.69718	0.67349	0.79366	0.88141	1.15461	1.15425	0.9699	1.0351	1.12667	1.43542	1.531	1.68536	1.73097	1.75743	1.70908	1.5364	1.69089	1.59766	1.59297	1.52034	1.64218	1.6339	1.67262
Haiti	0.84969	0.56629	0.80351	0.71518	0.72799	0.83529	0.81484	1.2878	1.42459	1.24867	0.74325	0.7909	0.8828	0.6214	0.54018	0.93791	1.11355	1.44478	1.33549	1.48134	1.51811	1.65113	1.7093	1.70261	1.74775	1.75899	1.80374	1.98819	2.00563	2.24946	2.11973	2.10309
Honduras	1.69779	1.51065	1.53508	1.63712	1.66445	1.57046	1.7311	1.71037	1.959	2.37283	2.72721	2.6655	2.73735	2.72202	3.00279	3.47004	3.89316	3.82515	4.35604	4.86482	4.58271	5.31338	5.96223	6.00085	7.01076	7.27303	7.50766	8.30631	7.95931	7.25922	7.58868	7.97487
Jamaica	7.78939	6.69594	5.65662	6.01202	5.0075	4.49533	4.86304	5.22076	6.10535	7.05784	7.53755	7.82343	8.51804	8.63255	8.86711	9.96174	10.07898	10.53332	10.8957	11.21814	10.82881	10.90234	11.15322	11.58018	11.61719	11.23954	12.58139	13.23246	12.62004	9.23925	9.17691	9.55675
Martinique	0.63457	0.63173	0.62826	0.62036	0.55208	0.67268	0.75959	0.85701	1.03203	1.45639	1.56909	1.29992	1.46846	2.01132	1.97916	2.01818	2.0249	2.02184	2.02485	2.02485	2.05658	2.05595	2.07955	2.17065	2.24273	2.3617	2.3803	2.46868	2.45345	2.67338	2.67674	2.85287
Montserrat	0.01688	0.01937	0.01937	0.01937	0.0194	0.02098	0.02204	0.02518	0.02834	0.02835	0.03779	0.03466	0.04137	0.04138	0.0414	0.0477	0.0445	0.04767	0.05083	0.05083	0.05402	0.05402	0.05403	0.06036	0.06671	0.06989	0.07625	0.08302	0.09267	0.08324	0.08324	0.08786
Netherlands Antilles	15.98684	14.79227	14.16683	13.13497	12.44417	10.41308	10.09542	10.38926	9.48166	9.8284	9.74432	9.2084	9.54981	9.24977	9.64825	11.40864	11.41041	12.05161	12.01161	11.70843	11.61736	11.7091	10.78855	10.77317	10.88977	10.81542	11.98858	10.82505	10.59241	12.20526	11.55503	10.81422
Nicaragua	1.84261	1.90905	1.91126	1.8196	1.73757	1.97241	2.09757	2.08776	2.11591	2.1046	2.0117	1.92524	2.34501	2.3025	2.52185	2.77647	2.92613	3.01875	3.46728	3.74068	3.70306	3.94495	4.05225	4.11267	4.42324	4.59643	4.75781	4.71067	4.50239	4.49305	4.46067	5.03452
Panama	5.39492	5.23984	4.73327	5.01632	4.89827	3.60891	11.27109	11.72603	11.30376	11.14557	11.79867	11.83199	12.23495	12.03407	13.53772	14.44873	12.41837	12.77532	13.97885	13.0623	12.93748	13.45545	12.68118	12.61201	14.15277	14.81877	14.87685	15.1649	14.98225	15.87199	17.50346	15.89995
Paraguay	1.386	1.27438	1.24988	1.31962	1.44077	1.45881	1.52199	1.92753	1.72482	2.30977	2.19678	2.02319	2.3256	2.4693	2.9009	3.33952	2.69952	2.95781	3.3738	3.81179	3.56069	3.45352	3.59775	3.73401	3.75238	3.69013	3.6848	3.73268	3.82742	4.0942	4.44334	3.98687
Peru	21.82999	22.77469	26.14034	24.02237	22.80993	22.82534	25.4726	24.60312	24.76576	21.41245	20.09532	18.88535	20.13955	22.25413	23.22708	24.73043	25.71497	25.36222	26.03132	26.63615	26.91851	26.0948	26.17441	26.47413	29.57815	31.29326	33.79102	33.73708	36.28661	37.04558	41.88544	37.70998
Puerto Rico	28.87834	31.03023	22.6923	22.08202	24.37495	21.07029	22.96817	24.09096	21.61003	20.4548	20.22531	24.02094	23.34286	24.48118	25.25536	24.27539	24.21373	24.96988	27.50992	26.34021	27.71559	34.54121	35.22469	37.44661	38.20017	37.79224	37.86652	34.17235	34.37078	28.99281	32.3525	28.52504
Saint Kitts and Nevis	0.05054	0.05339	0.0616	0.05047	0.05054	0.05041	0.05351	0.05665	0.0661	0.06612	0.06612	0.07555	0.07632	0.08587	0.10177	0.09229	0.10485	0.10483	0.10481	0.10481	0.10482	0.10482	0.10483	0.11751	0.13021	0.13657	0.18106	0.25779	0.27314	0.27004	0.27004	0.30269
Saint Lucia	0.11181	0.08778	0.10585	0.09704	0.09722	0.12107	0.12372	0.13339	0.16775	0.16773	0.16753	0.16739	0.17552	0.17228	0.19308	0.19599	0.1959	0.2054	0.20532	0.20532	0.33248	0.34839	0.35487	0.38809	0.36954	0.37576	0.37762	0.40943	0.43082	0.41273	0.41273	0.4249
Saint Vincent/Grenadines	0.03793	0.03498	0.03796	0.03791	0.03501	0.0398	0.03975	0.04279	0.05135	0.07599	0.07812	0.07565	0.08287	0.07644	0.12186	0.12554	0.12548	0.13354	0.16369	0.16369	0.16682	0.17	0.17798	0.18587	0.19721	0.19864	0.19231	0.19613	0.22615	0.19548	0.19548	0.19889
Suriname	2.09187	1.80674	1.60646	1.16512	0.97745	1.24483	1.31957	1.16458	1.11417	1.19232	1.5069	1.48952	1.43623	1.49598	1.48753	1.51083	1.49554	1.5219	1.53537	1.53537	1.60936	1.69661	1.78739	1.83301	1.9113	1.97127	2.02972	1.99605	1.95248	2.05052	2.00794	2.33469
Trinidad and Tobago	10.55811	10.10466	9.87596	15.05785	16.05409	17.85539	16.78243	16.97692	17.20899	17.43469	18.18525	18.61235	17.4044	19.27907	21.74475	22.62586	24.20523	25.70492	25.53442	26.25951	27.51062	30.0099	30.88814	29.77927	32.56101	39.24899	47.20115	46.64316	49.55566	47.82784	52.30006	52.06857
Turks and Caicos Islands	NA	NA	NA	NA	NA	NA	NA	NA	NA	NA	NA	NA	NA	NA	NA	NA	NA	NA	NA	NA	NA	0.01661	0.01284	0.01284	0.01284	0.01284	0.01238	0.07311	0.07776	0.16529	0.16529	0.15553
Uruguay	5.76053	5.19486	4.92066	3.8934	3.69454	3.45021	3.45059	3.98079	4.7169	4.88452	4.49892	4.24131	4.52344	4.94846	4.65823	4.66325	4.94778	5.22613	6.40292	7.26775	6.51914	4.9478	5.37004	5.56014	6.03891	6.28745	7.37054	7.03294	8.00138	9.06087	8.46518	8.32609
Venezuela	94.26527	101.53149	101.60683	96.09456	96.14236	96.40039	104.32791	105.70867	104.06262	108.01782	109.72732	111.47878	111.7218	113.54137	119.40635	124.40795	133.28689	134.95925	142.28993	128.62392	134.44861	148.69568	146.69859	133.64458	143.3813	145.87801	150.55214	152.6701	161.79438	157.55979	174.15738	182.66089
Virgin Islands, U.S.	16.93945	15.13705	11.00023	7.74079	9.00394	10.12116	6.65437	7.93927	5.25864	7.76805	7.4522	7.96444	8.34233	8.39561	8.36195	8.55112	8.52571	8.28941	8.74503	8.87949	9.83616	13.6362	13.05693	14.57921	17.66348	15.621	16.58445	14.74716	12.93401	15.21083	15.56387	18.5938
Virgin Islands, British	0.02217	0.03498	0.03468	0.03498	0.0321	0.03275	0.03777	0.04407	0.04723	0.05039	0.05039	0.05039	0.0541	0.05411	0.05413	0.05406	0.0604	0.06039	0.06036	0.06036	0.06038	0.06038	0.06039	0.0699	0.08895	0.09531	0.10166	0.11116	0.11827	0.11372	0.11372	0.14719
Albania	8.85858	8.86997	8.82775	9.08935	9.23048	9.30827	9.31318	8.81182	9.15808	8.20548	6.07468	4.38982	3.78002	2.82149	2.25899	2.34312	1.96682	1.92291	2.29608	2.94514	3.26206	3.57044	3.75629	4.21756	4.35083	4.62263	4.55077	4.38741	4.37229	2.81575	3.80124	4.18272
Austria	55.84111	54.492	51.07094	51.06348	54.36084	55.06999	53.83859	54.9637	52.69033	52.86838	55.70804	60.20167	56.94102	58.37173	57.78424	59.26941	64.9119	64.33727	67.22984	64.75002	63.83874	67.72159	70.66073	74.11324	75.54193	77.4961	73.18326	72.57579	71.18608	65.58184	69.30094	67.18218
Belgium	135.69422	138.05175	129.16249	114.29496	118.77065	119.24203	120.68335	119.85708	117.02259	123.5173	125.2719	129.94324	124.41597	125.71941	135.294	138.83533	142.64921	145.51622	150.72044	143.03252	148.10293	145.29199	142.21544	150.91553	153.35375	150.83044	142.32897	141.71804	154.74387	132.74756	136.2484	131.06315
Bosnia and Herzegovina	NA	NA	NA	NA	NA	NA	NA	NA	NA	NA	NA	NA	18.97123	15.18075	5.01314	8.85347	4.51521	9.49134	11.79285	11.67443	15.12668	14.78228	15.91154	16.12983	17.14301	18.37946	19.08307	18.63897	21.03717	21.44209	21.93297	22.1952
Bulgaria	88.55607	86.44006	89.37929	89.45973	90.35617	92.52152	96.91389	96.16265	92.31958	85.44897	76.18843	56.79924	57.59241	52.04834	51.02403	52.07814	53.58898	54.08125	49.86223	44.71448	49.02571	52.36949	47.96401	51.65898	51.12017	52.25247	52.90459	51.89924	50.61403	42.52315	45.58302	52.44446
Croatia	NA	NA	NA	NA	NA	NA	NA	NA	NA	NA	NA	NA	16.58235	16.94274	17.77997	18.34657	17.43698	18.70542	19.86456	20.09782	20.10266	20.241	21.09237	22.38863	21.66868	20.97916	22.80971	21.91373	22.31975	20.03942	19.58708	22.35102
Cyprus	2.82934	2.43902	2.60235	2.8764	2.97848	3.20664	3.56584	4.0126	4.01428	4.88049	5.08823	5.13054	6.03664	6.14875	6.90061	6.77356	6.73148	6.76187	7.26588	7.89936	7.53154	8.19411	8.10356	8.10904	8.59759	8.83332	9.35872	9.32367	9.80452	9.22543	8.86668	9.50276
Czech Republic	NA	NA	NA	NA	NA	NA	NA	NA	NA	NA	NA	NA	NA	116.79167	110.23448	111.01023	116.54139	99.38445	94.75238	85.61422	94.59531	95.57338	92.54139	93.3943	90.2912	93.91269	96.83236	103.5454	99.10063	92.09819	94.68667	92.39661
Denmark	64.96699	60.30973	55.43762	51.48153	54.4838	63.36825	64.84358	64.27669	59.17197	59.12863	57.10724	64.15229	61.2842	59.1792	64.71702	69.21231	72.47593	74.68203	60.05305	57.58385	54.49763	56.04486	53.13928	61.69471	56.31166	51.86772	59.31292	56.87549	54.21517	49.30729	45.8771	46.66476
Faroe Islands	NA	NA	NA	NA	NA	NA	NA	NA	NA	NA	NA	NA	0.61305	0.61308	0.62103	0.65124	0.66927	0.67059	0.66112	0.66112	0.67384	0.67386	0.67388	0.68019	0.68859	0.6929	0.78669	0.71094	0.6997	0.72467	0.73198	0.78526
Finland	55.34032	52.09231	46.86731	44.22106	42.79488	46.80263	50.34772	50.92202	49.2232	51.69867	53.22977	51.25314	49.48811	52.4029	58.00564	49.84733	53.05097	53.86428	50.16311	47.96596	50.12223	53.09972	53.56079	66.65487	61.46356	51.92397	57.91933	58.1547	54.85368	51.60949	54.64973	54.05596
Former Czechoslovakia	208.62084	207.2675	206.44503	208.44017	213.88443	210.99529	207.41143	211.6845	205.0735	202.00223	196.38009	172.62598	160.31537	NA	NA	NA	NA	NA	NA	NA	NA	NA	NA	NA	NA	NA	NA	NA	NA	NA	NA	NA
Former Serbia and Montenegro	NA	NA	NA	NA	NA	NA	NA	NA	NA	NA	NA	NA	45.61227	39.07306	37.87638	30.81198	49.99544	51.14625	53.62943	40.53321	46.02717	47.57812	52.75651	56.49377	57.32045	54.41256	NA	NA	NA	NA	NA	NA
Former Yugoslavia	105.93278	115.2383	118.28644	123.66343	143.61152	150.21624	148.08891	150.05823	152.25579	152.77264	149.97745	133.95027	NA	NA	NA	NA	NA	NA	NA	NA	NA	NA	NA	NA	NA	NA	NA	NA	NA	NA	NA	NA
France	488.91734	443.72934	423.31164	408.54201	394.76542	396.75921	362.82371	355.40599	340.33316	365.19686	367.68204	392.7922	382.07008	368.56737	361.2481	372.53944	390.4612	384.12969	409.4431	403.26764	401.65133	405.63546	401.7274	408.38341	410.91407	413.96205	416.3678	423.05632	428.5457	386.15036	388.66282	374.32734
Germany	NA	NA	NA	NA	NA	NA	NA	NA	NA	NA	NA	928.95023	895.05185	892.9356	875.33895	890.81954	890.29632	887.69469	869.9027	838.88476	854.65732	877.98355	855.33033	871.92817	867.4659	847.35868	850.62032	826.7167	823.31124	772.42236	793.30616	748.48561
Germany, East	296.78964	296.97058	299.95974	295.36527	310.83192	326.08481	318.76489	319.90838	318.86238	309.72832	292.4939	NA	NA	NA	NA	NA	NA	NA	NA	NA	NA	NA	NA	NA	NA	NA	NA	NA	NA	NA	NA	NA
Germany, West	759.25387	720.63427	696.59768	696.99343	711.00228	688.14703	718.5922	704.64219	698.27926	676.91206	698.13987	NA	NA	NA	NA	NA	NA	NA	NA	NA	NA	NA	NA	NA	NA	NA	NA	NA	NA	NA	NA	NA
Gibraltar	0.48881	0.54815	0.48793	0.38556	0.35719	0.82151	1.43557	1.45472	1.88087	1.60987	1.67143	1.72386	3.09453	3.21345	3.22938	3.23555	3.24857	3.23729	3.71855	3.24512	7.29595	3.96678	4.02884	4.14161	4.28478	4.37765	4.4832	4.622	4.55158	4.86385	4.94606	4.90493
Greece	51.97103	52.56972	51.13884	54.46542	55.85461	60.62155	63.69114	69.72011	74.79683	78.11323	81.49799	81.41721	79.58574	83.29547	84.72825	85.84227	86.72566	91.17178	96.98653	95.64486	101.28763	103.12057	102.39419	106.18444	105.1597	105.32918	105.72397	109.46711	106.04136	99.82669	92.87872	91.29833
Hungary	83.74782	82.86481	82.33722	80.91016	81.61157	82.46794	77.27753	76.91374	72.39188	71.33415	66.75009	66.11858	62.70123	58.9576	58.9005	57.57987	59.36268	58.69845	58.08906	58.25256	55.35246	57.37571	57.45421	59.59952	58.04989	59.49867	58.51219	56.62752	56.0523	50.94708	51.31713	49.56284
Iceland	1.64828	1.55597	1.55599	1.61849	1.69056	1.84498	1.96153	2.03546	2.12357	2.2628	2.36039	2.21819	2.3186	2.45367	2.54733	2.48268	2.78915	2.82543	3.01479	2.97834	3.17456	3.03775	3.16903	3.18793	3.31729	3.31724	3.40521	3.87777	3.69561	3.36309	3.26917	3.80874
Ireland	21.43849	20.63257	20.17114	19.67876	19.10573	20.01602	23.68927	24.42866	23.51638	24.30773	25.73428	26.81754	27.582	28.15055	29.35098	30.32952	31.73337	34.4013	36.59629	38.55054	40.68223	43.30464	42.37211	41.41226	43.54984	44.53907	46.07225	45.1305	45.48569	39.31496	38.24152	36.56834
Italy	371.78882	365.7396	355.30603	346.33531	350.66637	365.73914	371.48727	391.83364	397.03921	412.49844	415.40895	416.44257	415.10033	412.19965	403.73635	431.43459	423.4916	423.98947	440.8473	440.58254	447.72292	444.807	451.82681	472.22356	468.92518	471.88539	467.48605	459.5288	449.74859	407.6301	416.8183	400.93916
Luxembourg	11.64185	10.05868	9.41381	8.84093	9.75479	9.78212	9.71638	9.19459	9.66507	10.38584	10.72024	11.3611	11.24665	11.90714	10.97751	8.89619	9.02487	8.63597	8.00945	8.50593	9.02216	9.58001	10.40889	10.9829	12.29789	12.62199	12.45234	12.1445	11.96111	11.43675	12.15519	11.86869
Macedonia	NA	NA	NA	NA	NA	NA	NA	NA	NA	NA	NA	NA	9.33058	9.80188	8.98013	9.30846	9.89799	9.82266	10.84904	9.94145	8.41702	8.30939	8.11957	8.21171	8.15741	8.00414	7.93511	8.08239	8.67102	8.01202	7.64031	6.94678
Malta	1.25892	1.37629	1.49646	1.10541	1.58421	1.37463	1.61858	1.80822	2.07029	2.26054	2.37184	2.3899	2.37096	2.77017	2.75047	2.51461	2.61209	2.78787	2.89917	3.30577	2.91414	2.4707	2.93537	2.92473	2.98241	3.08428	2.94229	3.10463	3.17696	6.68233	8.00422	6.83
Montenegro	NA	NA	NA	NA	NA	NA	NA	NA	NA	NA	NA	NA	NA	NA	NA	NA	NA	NA	NA	NA	NA	NA	NA	NA	NA	NA	1.7717	1.61647	2.15759	1.54964	2.03002	2.1662
Netherlands	201.09722	193.2739	181.6551	174.04929	183.91007	191.19309	195.32762	200.68248	203.84685	203.15673	211.1154	218.60514	212.44387	222.15555	222.1281	222.61467	228.07359	238.48168	237.92431	235.52403	246.26736	261.48261	254.19136	257.60778	264.54851	268.47709	269.9252	258.10382	249.49727	243.75934	254.8712	252.99593
Norway	33.56954	31.15674	28.69654	29.43985	30.69358	33.92082	36.46863	34.48726	34.022	36.0097	34.78403	32.35998	35.67166	34.15031	36.09126	37.8644	39.84245	41.75265	41.99082	44.07739	41.25803	41.51977	42.40905	45.46122	48.11962	42.05884	41.04376	42.15949	40.02858	44.71699	45.10317	45.86907
Poland	428.9461	386.60833	390.16947	391.10386	408.79053	422.0431	427.77707	440.86436	429.85184	412.7822	333.78877	329.40802	327.7777	338.64358	321.8543	308.15879	344.428	336.55756	313.85209	326.43342	292.56379	276.41784	275.57246	284.78862	292.18569	287.58905	299.14629	295.94881	294.69969	286.47039	304.72272	307.91092
Portugal	23.5631	21.09055	27.43374	28.04033	27.06227	29.20791	31.39801	32.58319	34.02261	43.00707	43.91493	44.34718	47.59515	45.84061	46.51251	50.82539	48.4211	52.44745	56.19003	63.4415	63.54049	61.10896	65.98679	61.86158	63.387	66.06746	61.47421	59.61391	55.73528	58.40664	54.21015	54.17396
Romania	170.89883	173.61565	179.43212	186.25762	180.8792	182.73587	187.83286	192.56999	190.54869	196.84135	176.0997	135.6599	129.83226	123.15576	116.93562	123.63574	126.54074	120.32107	100.54788	91.17566	93.27748	102.00258	99.991	99.6993	100.30064	97.13741	99.29826	98.72974	93.92158	78.4657	76.34094	86.18996
Serbia	NA	NA	NA	NA	NA	NA	NA	NA	NA	NA	NA	NA	NA	NA	NA	NA	NA	NA	NA	NA	NA	NA	NA	NA	NA	NA	57.59068	55.04974	56.0188	54.82479	55.35806	58.49806
Slovakia	NA	NA	NA	NA	NA	NA	NA	NA	NA	NA	NA	NA	NA	42.8662	40.19206	42.57182	43.85972	41.47874	38.70837	37.2521	36.39909	39.62207	39.10684	39.36345	38.23202	39.60462	39.68137	37.72669	37.41842	34.44978	35.57277	34.88257
Slovenia	NA	NA	NA	NA	NA	NA	NA	NA	NA	NA	NA	NA	12.41983	13.56949	13.07382	15.28837	16.98967	16.63077	16.2282	16.37661	15.67823	16.07139	16.52661	16.79661	16.81052	17.08301	17.07942	16.92579	17.42004	16.11383	15.98877	15.82996
Spain	194.99611	205.23057	220.93822	225.59261	210.62026	205.04369	199.23736	201.32119	202.16512	221.59279	224.13592	237.00388	241.81202	230.61983	236.88043	243.37776	237.38145	265.34375	275.02179	298.66767	315.6442	320.28345	337.75752	346.37322	366.85032	379.37779	372.27362	387.95157	360.10337	327.80082	312.40183	318.64374
Sweden	82.29665	72.84509	63.24764	59.38157	57.26915	61.85325	65.68654	64.0428	61.51127	58.11785	57.07773	56.47635	58.98541	60.57462	64.75707	64.16948	67.35653	65.74283	66.17962	64.75608	60.65445	60.23903	57.10442	60.75723	60.37032	57.60959	56.73196	56.5168	54.60931	49.8271	59.18913	53.14585
Switzerland	47.21855	39.84835	36.98134	39.82176	39.67316	41.06636	44.20575	42.65892	42.57752	42.04648	43.48139	45.12616	45.77941	43.53295	42.83332	44.12218	44.97409	43.97808	45.808	46.15536	45.43946	45.91141	44.32776	45.0749	45.46537	45.74944	45.54336	43.87827	45.344	44.07276	42.01558	43.364
Turkey	68.59411	63.11985	73.26706	78.49025	82.00407	93.10756	105.69828	109.704	103.46051	119.95931	129.47583	137.29192	138.0565	144.57628	139.94891	153.18962	169.11045	182.28198	184.13382	181.60744	201.92614	184.17996	194.53327	206.02708	210.47248	230.89754	250.95748	280.19062	272.90035	269.06308	269.36551	296.33522
United Kingdom	613.56839	599.325	571.93893	577.64691	564.15606	589.26109	595.24309	606.73121	599.40427	612.11361	601.82454	609.9796	577.03357	582.61909	572.24494	560.13332	588.85443	566.80184	561.80729	556.89338	560.33888	572.69809	561.67509	572.57602	583.4182	583.06362	585.49888	569.89458	563.87228	516.19096	528.89349	496.79922
Armenia	NA	NA	NA	NA	NA	NA	NA	NA	NA	NA	NA	NA	11.13522	6.67025	6.08004	7.34256	8.25689	7.59938	8.02264	7.99061	8.61153	8.77753	8.39635	9.02351	9.18418	10.36086	10.35427	11.43854	11.17625	10.10835	10.58378	11.74023
Azerbaijan	NA	NA	NA	NA	NA	NA	NA	NA	NA	NA	NA	NA	60.14374	50.44173	46.12144	45.26591	38.91874	38.45717	47.8193	48.87142	43.76152	31.22446	34.18749	33.90226	35.92774	37.19268	39.89209	33.80993	38.4983	30.75187	29.50056	36.51941
Belarus	NA	NA	NA	NA	NA	NA	NA	NA	NA	NA	NA	NA	91.58363	81.27578	66.09521	62.34372	60.59623	58.84189	56.75176	58.16409	60.05203	54.49816	50.96152	55.66931	54.82268	64.33043	66.42475	66.1556	66.94103	61.14291	64.35534	67.15781
Estonia	NA	NA	NA	NA	NA	NA	NA	NA	NA	NA	NA	NA	25.8427	16.7532	16.60345	14.77492	19.62725	18.28543	18.57254	16.04302	16.27713	16.65183	16.50942	18.63055	19.27014	18.94793	18.68167	19.99652	18.86217	16.13839	19.34796	20.26289
Former U.S.S.R.	3081.87018	3110.54298	3224.41572	3287.41978	3421.9366	3535.69483	3667.94575	3718.86495	3808.24644	3739.08638	3820.84978	3521.3879	NA	NA	NA	NA	NA	NA	NA	NA	NA	NA	NA	NA	NA	NA	NA	NA	NA	NA	NA	NA
Georgia	NA	NA	NA	NA	NA	NA	NA	NA	NA	NA	NA	NA	15.4898	7.73623	4.98844	5.41631	5.68274	5.93072	5.95581	4.82433	4.63094	4.04556	4.54154	3.72334	4.15085	4.86343	4.89927	5.69266	5.75952	6.50681	6.37872	5.86761
Kazakhstan	NA	NA	NA	NA	NA	NA	NA	NA	NA	NA	NA	NA	260.969	225.75836	167.02792	139.12055	141.38415	119.1802	115.4607	132.29169	132.71124	139.97994	143.77348	138.03468	164.68431	169.38925	180.0946	181.98328	184.9191	169.79043	178.70808	195.35452
Kyrgyzstan	NA	NA	NA	NA	NA	NA	NA	NA	NA	NA	NA	NA	14.02581	10.41992	8.42717	5.54278	7.07216	7.23318	7.73853	7.44973	7.20941	6.51852	5.77841	5.21465	5.86723	5.51814	5.43654	5.12468	5.15228	7.88337	7.47725	7.79292
Latvia	NA	NA	NA	NA	NA	NA	NA	NA	NA	NA	NA	NA	12.7518	9.20904	8.76452	9.31306	9.92124	8.50758	8.2626	7.47291	7.37642	7.66931	7.44142	7.87107	8.18748	8.61124	9.31882	8.59771	8.05378	7.93639	7.84508	8.47462
Lithuania	NA	NA	NA	NA	NA	NA	NA	NA	NA	NA	NA	NA	23.25007	17.61512	18.48037	17.63548	15.87228	16.34484	17.42669	13.71643	13.27217	13.01936	13.29898	13.59123	13.39381	15.65937	16.55272	17.7792	18.22991	13.50371	14.26175	16.04993
Moldova	NA	NA	NA	NA	NA	NA	NA	NA	NA	NA	NA	NA	20.55631	14.94065	11.05044	8.99385	9.40386	8.88305	8.01589	6.05661	5.88816	5.82117	6.33981	6.94701	6.54757	6.83804	7.24488	6.93383	7.26582	6.56653	6.61911	6.46697
Russia	NA	NA	NA	NA	NA	NA	NA	NA	NA	NA	NA	NA	2020.19406	1863.3376	1688.83199	1603.06168	1506.08381	1395.61142	1384.49958	1458.92922	1498.77334	1442.25877	1500.77709	1551.98274	1599.61598	1587.52584	1635.92811	1580.6124	1645.59776	1554.55364	1642.29034	1788.13646
Tajikistan	NA	NA	NA	NA	NA	NA	NA	NA	NA	NA	NA	NA	7.95785	5.22399	5.06752	3.5972	4.70694	4.76429	5.12297	5.54224	5.9538	6.17881	6.05787	6.67247	7.10983	7.42302	7.41797	7.22727	6.87224	2.43787	2.65457	2.61769
Turkmenistan	NA	NA	NA	NA	NA	NA	NA	NA	NA	NA	NA	NA	20.45184	19.095	18.243	18.55045	18.19978	19.42334	17.59227	19.0736	23.94367	29.75931	34.18472	44.0138	47.01419	47.98736	48.77233	52.01409	55.98046	50.72705	52.09079	51.85311
Ukraine	NA	NA	NA	NA	NA	NA	NA	NA	NA	NA	NA	NA	533.08157	494.32889	413.14956	421.44531	364.3598	342.22317	331.34267	325.68223	324.86674	316.74254	324.67724	355.28306	344.65994	351.12759	331.33563	351.99596	350.53113	245.75633	281.08672	304.44916
Uzbekistan	NA	NA	NA	NA	NA	NA	NA	NA	NA	NA	NA	NA	95.94923	115.80393	97.89193	105.06716	103.47709	103.18353	101.80696	103.09337	107.72731	112.58531	115.34722	116.01702	122.49509	117.11357	121.15045	122.89486	127.11915	107.1491	106.15908	115.88258
Bahrain	7.75915	8.83596	9.36404	10.72794	9.57391	11.36319	12.24757	14.7374	12.64625	13.05728	14.28942	15.92954	13.57428	16.02692	15.83687	15.8843	15.86384	18.47055	19.42673	20.25491	20.2649	20.7952	21.84896	22.44671	23.14127	24.72072	27.2431	28.59267	29.90655	30.20964	30.59408	29.69705
Iran	116.8398	108.11211	133.66963	155.99003	151.04488	159.94413	165.40937	174.21224	180.71925	195.34032	202.1115	226.77599	234.80769	237.81678	250.92163	262.3225	262.95465	290.71418	294.61265	317.90316	321.45562	334.15259	365.11253	387.74014	407.93242	451.05783	477.36746	489.35062	512.04895	562.58509	564.62271	624.85538
Iraq	51.66929	37.76243	36.79524	42.74375	42.8556	47.588	56.12028	53.29607	59.99045	64.24813	69.18957	42.45889	57.68557	66.44266	76.92435	77.09005	76.96558	69.82813	72.18165	75.43736	73.58195	77.68226	79.59632	71.58375	78.41274	94.86728	91.4548	99.43071	104.16652	112.59202	113.53926	139.35388
Israel	23.49582	24.85765	26.03603	27.25195	27.52108	26.51806	28.04965	30.54496	32.94029	33.88413	34.96909	36.13764	41.848	46.04294	48.5998	49.07514	49.60428	54.53833	56.42014	57.58262	60.32733	67.12801	65.57544	64.63918	66.14616	68.64171	68.62784	69.16152	66.89383	65.58904	70.56747	72.09509
Jordan	5.20715	6.16414	7.04057	7.55649	7.83853	8.10476	9.0477	9.97863	9.28156	9.41507	10.17708	9.61797	11.198	11.07123	12.69503	13.21678	14.24072	13.78142	14.87472	15.14986	15.63461	15.29613	15.99701	17.07831	18.23044	19.28074	20.05841	19.86137	19.29528	19.62522	20.65652	18.55409
Kuwait	31.41165	23.59753	23.10939	25.49811	26.49263	25.67314	29.61867	33.86748	38.42819	43.07767	27.73969	42.48103	23.50851	30.70971	37.4524	39.98899	49.31749	52.82178	56.78725	56.4929	59.49859	57.45992	56.22943	63.43654	67.87363	76.0541	76.64155	74.52153	78.09866	82.23739	86.49087	82.36932
Lebanon	6.43733	5.97684	5.88534	6.17139	5.89202	6.86421	6.94561	7.22116	6.53587	5.00048	4.70651	8.21401	8.16408	10.27375	11.76998	12.62345	13.20876	15.31949	15.29566	15.99775	16.45474	15.97591	16.02242	16.14654	15.7463	15.03678	13.39559	12.54014	14.65259	19.84527	19.18424	19.4548
Oman	3.96	4.15887	5.04018	5.78515	7.72769	7.3719	8.80586	8.93252	8.08884	10.41119	12.45554	14.19124	13.52888	14.7654	15.08487	14.13844	14.60297	17.95616	21.81789	20.55964	21.79211	22.20316	22.98648	22.46521	24.35701	30.17277	34.96586	37.04015	43.75853	46.04522	52.74596	52.67441
Palestinian Territories	NA	NA	NA	NA	NA	NA	NA	NA	NA	NA	NA	NA	NA	NA	NA	NA	NA	0.40619	0.50171	0.53534	0.62818	1.25086	1.04483	1.17794	2.09551	2.65387	2.89097	2.89378	3.01014	2.04248	2.04248	2.50155
Qatar	13.86339	14.02666	14.14713	12.82985	15.43449	13.8269	14.28084	14.51794	14.80559	15.35724	18.77721	22.3054	25.5863	29.92259	30.01006	30.3117	31.01969	32.65032	33.40357	31.84954	34.69834	27.55978	29.44254	32.47879	38.64129	54.95072	58.36638	59.60496	63.50041	68.38691	68.23654	64.45829
Saudi Arabia	176.92239	175.21746	165.56913	166.31922	184.01317	179.21683	190.08573	191.15337	200.24858	198.8782	208.02435	226.43768	235.46438	232.92763	239.93246	235.28881	250.0802	255.11503	258.17926	264.04453	290.53938	301.34016	311.6248	347.2572	388.76301	401.92682	402.42293	392.69352	421.63629	437.68518	468.72759	513.52677
Syria	16.43024	17.53151	17.7009	20.33739	22.33814	23.49956	24.01695	27.67578	28.51178	30.86927	36.9253	33.15017	35.37744	38.60506	41.39777	39.88266	42.25533	44.43275	47.74405	50.87953	50.99418	49.34207	52.4336	52.84742	52.79437	50.64561	51.67335	52.67491	54.41043	61.62836	65.5212	63.14205
United Arab Emirates	30.31169	35.10691	35.71641	42.69793	47.56111	59.30779	67.08497	71.23901	78.22029	81.93822	79.08048	94.59572	102.04919	95.79274	94.40951	100.93512	103.7061	112.07409	116.83966	118.38918	115.72235	115.33363	123.80673	127.14137	133.52284	139.7945	155.32627	171.58193	195.80483	205.74913	214.41368	245.37672
Yemen	6.43422	6.55207	7.70043	7.02996	8.88103	9.90965	9.99164	9.89907	10.22811	10.84793	11.4417	11.76185	12.23382	10.09167	9.90061	10.67227	10.91076	10.80055	11.3989	12.3126	13.17836	13.96662	15.39772	16.65359	16.65126	17.37638	18.97605	18.54596	22.83519	22.09077	20.9841	23.74853
Algeria	66.9787	54.69104	65.99867	71.58791	74.94458	71.31377	71.74532	77.18264	80.58709	78.84531	83.1191	85.80045	82.05134	82.26749	84.22196	88.03854	84.62374	80.83244	84.85572	84.55817	83.62997	79.15785	81.6771	81.70435	80.49461	90.14132	94.64754	101.14551	106.83238	113.8233	112.56436	117.24099
Angola	3.38912	3.38012	3.58703	3.85161	3.41319	4.28732	4.5947	4.65264	4.83821	4.73478	7.16848	7.4825	7.50371	7.67947	7.38942	12.14786	12.15167	12.95903	12.37195	13.48201	13.03284	14.98353	15.64893	18.90678	19.82595	20.00292	20.92849	23.70157	23.08454	24.47161	26.59134	26.97333
Benin	0.42067	0.41632	0.27793	0.42118	0.41568	0.49576	0.50243	0.3752	0.46995	0.50276	0.58746	0.67372	0.76501	0.83841	0.88165	0.96226	1.03512	1.12665	1.21636	1.32429	1.65022	1.65022	1.74761	2.05564	2.40003	2.52598	3.00678	3.29473	3.35844	4.50767	5.05743	4.65475
Botswana	1.24836	1.26764	1.2035	1.14529	1.16626	1.50091	1.63144	1.91439	2.03875	2.32458	2.71296	2.78098	3.19916	3.15295	3.17868	3.47552	3.07202	3.18358	3.70763	3.74752	4.37426	3.86083	3.82039	3.50883	4.07181	4.3633	4.40432	4.15277	4.33554	4.32247	5.05007	3.8427
Burkina Faso	0.41825	0.41825	0.41933	0.42186	0.42093	0.40284	0.49316	0.51828	0.51364	0.47407	0.49889	0.57519	0.58439	0.63436	0.6856	0.68481	0.70708	1.07722	1.06692	1.06692	1.06094	1.07391	1.10354	1.14136	1.16062	1.05018	1.24786	1.38072	1.38475	1.70254	1.72968	1.45436
Burundi	0.0981	0.11161	0.09812	0.11215	0.14058	0.14558	0.15058	0.15684	0.24382	0.26705	0.29166	0.33137	0.31577	0.35068	0.37064	0.36076	0.36709	0.37034	0.37662	0.37662	0.37227	0.39592	0.39961	0.41538	0.38157	0.37063	0.36025	0.33461	0.35525	0.1994	0.19875	0.20473
Cameroon	2.22945	2.29109	2.66908	7.19977	7.0971	6.59122	9.38709	8.01977	3.48107	6.53495	3.42983	3.46956	3.5874	6.78382	7.58082	7.53554	6.78118	6.90238	6.89055	6.93117	6.83297	6.46851	6.18427	6.12142	6.4695	6.69472	7.26221	7.73558	7.53987	8.30876	8.54853	8.12627
Cape Verde	0.29932	0.29851	0.13298	0.13078	0.15847	0.15688	0.05311	0.05748	0.08275	0.09044	0.09635	0.09921	0.10672	0.10654	0.1161	0.11256	0.11762	0.11761	0.1176	0.1176	0.17464	0.13678	0.14473	0.14471	0.29752	0.25455	0.29244	0.34454	0.32451	0.37926	0.37926	0.42996
Central African Republic	0.13937	0.18141	0.19449	0.20911	0.1983	0.1999	0.2067	0.22408	0.23986	0.22726	0.24628	0.25887	0.26784	0.2742	0.29006	0.28904	0.29294	0.29928	0.30557	0.30557	0.32459	0.33107	0.34383	0.34376	0.32462	0.30883	0.32473	0.35731	0.33991	0.34058	0.34058	0.29392
Chad	0.27621	0.26304	0.26311	0.26304	0.12383	0.1533	0.27781	0.23728	0.16067	0.16584	0.33963	0.32211	0.32815	0.16354	0.16987	0.16937	0.17291	0.17608	0.17603	0.17603	0.19042	0.19354	0.19992	0.19989	0.18734	0.20761	0.22546	0.26712	0.26181	0.25406	0.25406	0.28977
Comoros	0.04142	0.04134	0.04134	0.04134	0.04204	0.03554	0.03775	0.05033	0.05347	0.05349	0.07	0.06686	0.06749	0.0675	0.07069	0.08324	0.08346	0.08346	0.08661	0.08661	0.09636	0.09954	0.10306	0.10302	0.10593	0.11231	0.11452	0.1446	0.11966	0.15095	0.13011	0.14835
Congo (Brazzaville)	0.72072	0.87183	0.72836	0.60515	0.61399	0.91379	0.81482	1.0144	0.79309	0.90354	1.14165	0.86288	0.85302	3.14326	3.12274	3.10417	3.08365	3.70514	3.66761	3.16639	3.01443	3.20125	2.98516	3.07015	3.07369	5.28792	5.44405	5.77373	5.96083	6.46333	6.79414	6.85847
Congo (Kinshasa)	3.39842	3.58975	3.68559	3.64691	3.40625	3.32152	3.83648	3.46428	4.23813	3.93918	3.64197	3.84657	4.34571	4.55862	3.57927	3.83158	3.86495	3.71211	3.55055	3.18665	2.69529	1.98965	1.78669	1.82928	2.36779	2.4474	2.43656	2.72779	2.69436	2.59724	3.13556	2.7205
Cote dIvoire (IvoryCoast)	4.01485	4.25006	3.93187	4.24535	4.13548	4.27728	4.80268	5.33713	5.64772	5.62304	4.64676	3.79943	3.8605	4.37784	4.55698	4.53699	5.72935	5.23051	5.40912	7.02689	7.36264	5.86497	5.80376	5.78998	6.34677	6.36742	6.27272	6.17883	6.38742	6.51809	6.61779	6.68025
Djibouti	1.45833	1.17312	1.17717	0.87288	0.72452	0.71858	0.71827	0.73088	0.71491	1.71621	1.73114	1.7497	1.77666	1.79876	1.82126	1.81238	1.81725	1.83501	1.83494	1.83494	1.85101	1.87055	1.87387	1.909	1.93923	1.92162	1.68	1.64784	1.70509	1.15975	1.15975	1.14975
Egypt	40.91547	48.91784	54.66073	63.99692	69.96757	75.60233	81.83756	83.93033	83.38915	86.09175	92.63333	94.22997	93.80216	95.36396	98.50983	99.24488	108.49669	112.06015	114.89942	117.5668	119.98311	129.29424	133.41601	143.22667	152.71773	158.99232	151.21307	157.90248	180.8311	184.82881	190.58713	201.6673
Equatorial Guinea	0.05549	0.05537	0.0694	0.06999	0.06975	0.07977	0.08493	0.08022	0.07866	0.11801	0.12115	0.12745	0.12236	1.06036	1.06035	1.05993	1.55501	1.60094	1.67657	1.84041	2.05361	2.05087	3.93732	4.91274	3.80769	4.89368	4.90002	4.62955	4.68116	5.4084	5.47723	5.23233
Eritrea	NA	NA	NA	NA	NA	NA	NA	NA	NA	NA	NA	NA	NA	NA	0.98717	1.06934	1.11444	1.13865	1.25008	1.06343	0.64128	0.75431	0.71518	0.80711	0.76279	0.71844	0.74435	0.70135	0.7289	0.51372	0.50859	0.62558
Ethiopia	1.70001	1.70227	1.8908	2.16597	2.11382	2.53316	2.55982	2.88884	2.75104	2.98107	3.0112	2.45871	3.64003	3.32699	2.19316	2.37558	1.7139	1.71383	2.61327	3.25405	3.45795	3.55034	3.88786	4.18523	4.34533	4.57928	5.15636	5.70997	6.42447	6.97507	6.44815	6.70277
Gabon	4.78154	4.98535	4.86144	4.77952	5.24873	5.34463	4.00184	3.87254	4.16908	5.71422	5.71557	5.72949	6.05589	5.94625	5.79188	5.48533	5.55558	5.6319	5.5424	5.40068	5.0733	4.95173	4.7086	4.89232	4.92687	4.8398	4.39398	4.43814	4.67176	4.25937	4.53669	4.75798
Gambia, The	0.1523	0.15203	0.15203	0.15203	0.16782	0.16475	0.16057	0.18586	0.1922	0.18913	0.19286	0.20173	0.20381	0.21657	0.23909	0.22271	0.22262	0.22257	0.23518	0.23518	0.26383	0.2829	0.28931	0.29237	0.29636	0.30507	0.32429	0.40246	0.37834	0.44356	0.48132	0.42559
Ghana	2.2309	1.94909	2.22618	1.99234	2.27369	1.90743	2.36141	2.72376	3.13514	3.60284	3.02945	2.9809	3.40868	3.49623	3.86752	3.98569	4.0975	3.82859	3.84263	4.47099	5.31871	5.17609	5.45678	5.94511	6.49114	6.53389	6.68283	6.77291	7.38905	7.48618	9.10806	9.00539
Guinea	0.81493	0.79988	0.81305	0.82029	0.83099	0.73601	1.05885	1.1216	1.14468	1.10994	1.4842	1.15815	1.18233	1.2115	1.24447	1.23419	1.24661	1.24648	1.25252	1.25252	1.30423	1.31375	1.32468	1.33072	1.35067	1.38058	1.37264	1.35532	1.34601	1.43346	1.43346	1.41942
Guinea-Bissau	0.08321	0.08304	0.08409	0.08402	0.11447	0.12428	0.10062	0.18869	0.21122	0.22077	0.28217	0.28863	0.29424	0.31387	0.32037	0.31687	0.32022	0.31763	0.32014	0.32014	0.35548	0.35866	0.37304	0.38244	0.38366	0.39579	0.39057	0.40445	0.46167	0.40794	0.40794	0.45984
Kenya	5.75138	5.78513	5.66614	5.50029	5.38964	5.47669	6.21332	5.49194	6.00906	6.57189	6.66229	5.82862	6.56449	6.69472	7.0923	7.17515	7.48742	6.95087	7.86011	8.09812	8.69947	7.97304	7.93573	8.35901	9.20865	10.1393	11.32301	11.20114	11.04056	11.61098	12.30548	12.62416
Lesotho	0.14593	0.13646	0.14693	0.14623	0.14593	0.14914	0.1562	0.15618	0.10313	0.15623	0.15621	0.15619	0.16172	0.1617	0.17947	0.17927	0.1797	0.17918	0.18207	0.18207	0.21183	0.21125	0.21128	0.21121	0.21179	0.22677	0.23462	0.23841	0.23982	0.23462	0.55122	0.44561
Liberia	1.88712	1.73545	1.73958	1.74248	1.57103	1.58018	1.28125	0.98596	1.12146	0.9859	0.57794	0.34049	0.3478	0.38297	0.38304	0.38272	0.39875	0.4019	0.4145	0.4145	0.44141	0.46771	0.50293	0.51923	0.52886	0.53687	0.61051	0.68008	0.69074	0.55232	0.53638	0.58796
Libya	32.44297	26.66898	27.79292	27.45571	26.2432	27.67952	30.11265	30.92202	34.83348	37.38086	42.40762	41.61424	36.55611	36.87615	38.14139	39.57935	41.76377	43.61528	41.87098	39.69436	41.8906	43.44562	48.37572	46.39196	52.35355	56.4356	52.1065	53.66092	56.78157	57.99763	61.68766	49.66926
Madagascar	1.1684	1.01081	0.87836	1.14481	1.13555	1.23678	0.91079	1.26796	1.39321	0.98505	0.95829	0.98387	1.07174	1.10375	1.23935	1.2777	1.28421	1.29735	1.29884	1.2894	1.81079	1.98208	2.29941	2.37972	2.62804	2.52389	2.49937	2.5052	2.81384	1.85917	1.88115	1.84277
Malawi	0.57585	0.61328	0.5501	0.43959	0.41997	0.45389	0.47583	0.43826	0.40936	0.49597	0.53465	0.65298	0.66175	0.64255	0.70812	0.73239	0.74344	0.74338	0.73936	0.83702	0.88301	0.85623	0.91631	0.90983	1.03888	1.09358	1.14856	1.15888	1.19386	0.96045	0.96517	0.95687
Mali	0.41802	0.55944	0.4185	0.41573	0.41694	0.45851	0.364	0.42697	0.21064	0.47046	0.46804	0.48386	0.49754	0.51364	0.52333	0.52257	0.53518	0.54462	0.55077	0.55077	0.56677	0.56675	0.6209	0.62721	0.64956	0.71954	0.6528	0.67137	0.70006	0.6975	0.6975	0.74231
Mauritania	0.60773	0.58278	0.58522	0.58089	0.87283	0.86309	0.51504	0.71453	0.88694	1.06556	0.95594	1.00825	3.31346	3.42516	3.39751	3.12711	3.46849	3.16576	3.17902	3.17666	3.24359	3.17648	3.05756	3.15102	2.63305	3.162	2.83296	2.71455	2.75747	1.89251	1.89251	1.77353
Mauritius	0.85421	0.76796	0.73824	0.84474	0.87099	0.88927	1.23453	1.00429	1.43291	1.70507	1.92155	1.89591	2.13355	2.29512	2.23792	2.43058	2.41479	2.41376	2.57258	2.67405	3.4897	4.05258	3.60123	3.71196	3.94853	4.09567	4.43513	4.92132	4.8657	4.33484	4.62239	5.05954
Morocco	16.43155	16.08782	16.76215	17.39119	16.61986	17.42319	19.91842	19.55487	20.21717	21.76047	22.6345	23.44027	23.73096	26.47983	28.97945	27.96118	28.78692	28.41428	28.80097	31.00899	31.19852	33.75202	33.69205	34.44293	33.20228	34.59597	35.67096	36.10856	37.23465	41.82644	43.29258	43.7109
Mozambique	2.62131	2.3375	2.48022	2.32675	2.04765	2.16563	1.25227	1.17905	1.6795	1.32928	1.18784	1.19196	1.19066	1.18116	1.12998	1.22438	1.07144	1.10635	1.25697	1.29781	1.27945	1.499	1.67709	1.8158	2.13182	2.35589	2.77375	2.50956	2.37787	2.53643	2.55343	3.426
Namibia	NA	NA	NA	NA	NA	NA	NA	NA	NA	NA	2.37572	1.26582	1.14651	1.52402	1.49443	1.31882	1.37939	1.44408	1.55128	1.71964	1.80901	2.17325	2.21985	2.43584	2.56774	2.62162	2.9183	3.10524	3.9338	3.60343	3.33619	3.21683
Niger	0.61027	0.63499	0.67615	0.75362	0.80566	0.80953	0.68813	0.77528	1.01877	1.06937	1.09294	1.10112	1.12326	1.14137	1.16075	1.15953	1.14961	1.13024	1.13008	1.13244	1.12491	1.14989	1.2312	1.26111	1.36555	1.26104	1.2189	1.25876	1.29303	1.28835	1.29147	1.27217
Nigeria	69.13846	58.81591	56.18683	55.56494	58.7558	61.0036	59.8968	60.67899	63.76769	76.6481	82.48042	88.63084	94.08992	96.64672	95.34827	100.15509	101.74439	92.02838	88.75357	84.81872	80.75236	91.51444	90.93528	92.77032	92.26493	105.99749	101.55191	99.12938	99.10262	68.03084	73.69287	75.96339
Reunion	0.60027	0.59653	0.64333	0.74879	0.82813	0.8052	0.79275	0.88331	1.06843	1.1652	1.22641	1.4325	1.40149	1.85178	1.88543	1.86455	1.87069	1.87973	2.41205	2.41205	2.51009	2.60828	2.58938	2.58572	2.6371	2.71849	2.73934	2.7864	2.82325	2.9352	2.9352	3.00508
Rwanda	0.15247	0.35137	0.33703	0.38862	0.63398	0.66768	0.64149	0.65359	0.62214	0.67854	0.70279	0.71223	0.7374	0.68329	0.69629	0.70562	0.70546	0.70113	0.72776	0.72776	0.76623	0.77279	0.77635	0.78574	0.76347	0.81206	0.83188	0.74268	0.72452	0.7649	0.76073	0.86513
Saint Helena	NA	0.00277	0.00277	0.00277	0.00278	0.00287	0.00315	0.00632	0.00632	0.00632	0.00631	0.00315	0.00318	0.00637	0.00637	0.00636	0.00636	0.00636	0.00635	0.00635	0.02224	0.0127	0.01271	0.0127	0.00953	0.0127	0.01176	0.01275	0.01355	0.00957	0.00957	0.0091
Sao Tome and Principe	0.0321	0.03206	0.03208	0.03206	0.0321	0.03313	0.03463	0.03463	0.03464	0.03466	0.06927	0.07304	0.07692	0.07694	0.08013	0.07942	0.08006	0.07939	0.07937	0.07937	0.09211	0.09209	0.09527	0.09525	0.09531	0.09843	0.10789	0.13358	0.13523	0.13347	0.13479	0.15161
Senegal	2.48792	2.40879	2.45888	2.34991	2.79618	2.7545	2.87666	2.93718	2.51864	2.61076	2.56006	2.35655	2.91642	2.93041	3.57551	3.8558	3.93618	3.57828	3.78534	4.17953	4.42907	4.40996	4.458	4.4974	5.30289	5.70733	5.89957	6.03805	6.08381	5.88974	5.95148	7.08837
Seychelles	0.21036	0.1695	0.15495	0.27069	0.28355	0.28928	0.31645	0.33654	0.46304	0.49148	0.45298	0.48784	0.50524	0.5179	0.52412	0.52715	0.52709	0.56523	0.5652	0.5652	0.58764	0.60351	0.88326	0.86951	0.89833	0.88168	1.19843	0.9805	1.0274	1.1718	0.98154	1.0878
Sierra Leone	0.711	0.7102	0.77839	0.71461	0.71249	0.79932	0.90774	0.97529	1.02718	1.05596	1.06574	1.11448	0.81047	0.82166	0.68036	0.84445	0.8443	0.86428	0.86747	0.86747	0.91835	0.93792	0.95384	0.97499	1.15819	1.15811	1.14527	1.24547	1.26054	1.39873	1.39873	1.49234
Somalia	1.11837	1.29339	1.26882	1.24	1.2862	1.26685	1.44135	1.06887	1.07331	1.10171	1.00807	0.59862	0.56541	0.58329	0.58334	0.58282	0.58426	0.5826	0.58246	0.58246	0.72425	0.72227	0.72381	0.72359	0.72577	0.73378	0.76306	0.86172	0.86754	0.81363	0.81363	0.75344
South Africa	235.02573	254.69735	272.93734	276.58362	296.46704	302.04645	308.72918	315.23488	319.55336	297.98976	297.97675	310.37274	320.1934	318.98936	347.1736	347.46623	352.27651	383.79648	365.33175	376.64597	386.01434	392.72296	379.97667	412.73435	442.19732	432.41292	444.38701	457.02175	489.96991	477.55845	473.15466	461.56503
Sudan and South Sudan	3.16308	3.24075	3.54237	3.39839	3.12029	3.50139	4.31726	4.17691	4.51931	4.28728	3.89406	5.61305	5.17325	4.91927	4.32964	4.00098	3.96702	4.10287	4.13334	4.45968	6.51119	7.46601	8.65922	9.80423	10.75862	11.41242	12.39016	11.97678	12.10186	18.12932	18.57161	18.46477
Swaziland	0.72976	0.68465	0.68465	0.5305	0.58837	0.72741	0.71143	0.73318	0.74175	0.76361	0.75853	0.7067	0.6478	0.58016	0.94113	0.91316	0.82293	0.99101	0.99101	1.00916	0.97204	0.97946	0.93121	0.88268	0.8731	0.74616	0.92006	1.04933	1.03299	0.98085	0.99037	1.02436
Tanzania	1.91743	2.21505	2.17542	1.91949	2.10146	2.12646	2.68616	2.40134	2.53627	2.52062	2.80644	2.3289	2.57691	2.77277	2.53026	2.46402	2.49849	2.45293	2.51299	2.69788	2.72488	3.08156	3.50328	3.67251	4.20058	5.04783	5.44338	5.84354	6.19648	6.74444	6.43978	7.2284
Togo	0.58233	0.53935	0.52161	0.56708	0.66808	0.6269	0.54184	0.49441	0.52136	0.59179	0.58396	1.0266	0.72358	0.5436	0.62698	0.62423	0.63104	0.6558	0.65557	1.00383	1.40118	1.00469	1.29214	2.15172	2.26541	2.27052	2.33147	2.55256	2.74497	1.32946	1.41194	1.44472
Tunisia	8.47987	9.33265	8.74043	10.01801	10.69741	10.82769	11.93127	10.89784	11.84509	13.0622	13.05306	12.96992	12.81003	15.11429	16.07068	14.39753	15.38279	17.32736	18.51606	19.09287	19.66527	21.42636	21.16646	20.81049	21.11623	22.28893	21.27892	18.87414	19.01482	18.79229	19.1636	20.51621
Uganda	0.70227	0.4453	0.52984	0.51581	0.53077	0.57029	0.67142	0.56313	0.85369	0.79082	0.844	0.93523	0.966	1.00155	1.02737	1.02614	1.02021	1.05092	1.2209	1.2209	1.2643	1.39438	1.46217	1.59229	1.6085	1.68655	1.91606	2.03914	1.96576	3.27832	3.39006	3.24425
Western Sahara	0.15699	0.15726	0.17523	0.16945	0.17583	0.17993	0.19689	0.20332	0.20658	0.20661	0.21616	0.21616	0.22157	0.21526	0.21526	0.23119	0.23115	0.23114	0.23112	0.23112	0.26633	0.26951	0.26952	0.2695	0.26956	0.30484	0.2695	0.28345	0.3146	0.2695	0.2695	0.31665
Zambia	3.63004	3.22424	3.39277	3.02931	3.00691	2.86444	3.07807	2.97288	3.26952	2.97548	2.72549	2.44088	2.97517	2.4331	1.9501	1.9251	2.19419	2.37691	2.2222	1.95828	1.8966	2.05702	2.1319	2.23244	2.23603	2.44161	2.30993	2.2494	2.2498	1.95342	2.19568	2.43373
Zimbabwe	8.87762	8.7091	8.17476	9.78631	9.25142	9.64826	12.47173	14.69693	14.95044	14.2041	15.14183	16.26943	16.53519	15.73616	15.22408	14.76066	14.80326	14.02544	14.02643	15.4203	13.71982	13.14709	12.52968	11.23029	9.84978	10.73974	10.03085	10.03041	8.13583	8.43746	9.13347	8.87463
Afghanistan	1.36105	1.5647	1.69949	2.10583	2.12793	2.17438	2.39826	3.945	6.542	6.41877	6.31929	2.97959	1.77021	1.71907	1.68365	1.4524	1.47146	1.42586	1.39268	1.41284	1.33551	0.84677	0.84782	0.67863	0.72232	0.76961	0.76614	1.31364	1.59156	6.40949	6.62528	6.58917
American Samoa	0.40232	0.46106	0.63732	0.40022	0.46088	0.43178	0.48232	0.49173	0.48545	0.55557	0.5775	0.57743	0.59897	0.59574	0.57979	0.56739	0.57689	0.57684	0.57677	0.57677	0.56412	0.5641	0.57366	0.5736	0.57365	0.60847	0.60258	0.65556	0.66442	0.60258	0.2846	0.42623
Australia	198.83496	204.61733	207.95607	218.25929	235.42329	237.70251	234.54928	250.92843	246.23108	261.51021	267.60124	268.32067	274.86821	283.28608	281.62183	289.06545	302.31274	331.29517	337.44912	355.33823	356.31114	370.05808	374.58991	376.07884	387.85511	412.61375	419.27045	423.79086	425.2362	424.33208	423.70762	392.28605
Bangladesh	7.63726	8.31733	8.92728	8.10222	9.33892	9.83248	11.18552	12.26322	13.35247	14.55608	14.92556	14.81087	16.50337	17.55212	19.38606	22.55571	22.75397	23.75784	24.14886	26.94437	29.35909	32.52105	34.22718	36.88772	39.12393	41.4297	45.13427	46.86245	51.02895	55.46474	56.97006	58.80612
Bhutan	0.00546	0.02601	0.03232	0.02976	0.02618	0.03336	0.03184	0.07866	0.08066	0.07786	0.12495	0.12468	0.13141	0.12927	0.20384	0.23952	0.26061	0.27022	0.27176	0.28914	0.2924	0.27495	0.30248	0.25724	0.21923	0.24904	0.23691	0.28865	0.28389	0.33163	0.33542	0.33568
Brunei	5.2355	5.57339	5.83571	4.86471	4.43341	4.99913	3.4608	5.1812	4.62921	5.25099	4.55982	2.28201	3.14001	2.94441	2.90415	3.5242	3.47518	3.66655	3.2683	3.66981	3.79427	4.22193	4.85702	5.18045	5.78367	6.78741	10.18528	10.4931	10.74226	7.34798	8.44944	8.6563
Burma (Myanmar)	4.01276	4.11705	4.54403	5.24231	5.71341	5.98213	4.89911	4.8198	4.57254	4.77443	4.66035	4.58636	4.61426	4.84124	5.82328	6.15464	6.26013	6.89863	8.09322	8.94566	10.0648	9.93131	10.88585	12.66781	12.73544	16.26988	15.02226	16.02392	14.84	11.90408	11.90701	13.6666
Cambodia	0.04096	0.04094	0.04094	0.35767	0.39884	0.41298	0.44841	0.45159	0.46875	0.46759	0.46759	0.4803	0.49939	0.49809	0.51105	1.40743	1.54692	1.86091	2.1155	2.13373	2.15153	2.53814	2.74804	3.01006	3.35192	3.56517	3.85899	4.20535	4.17976	4.08155	4.10147	4.39003
China	1448.46396	1439.85965	1506.94235	1593.38617	1724.48938	1765.57417	1878.66476	2010.69812	2148.31963	2183.13826	2177.70031	2295.66967	2375.6207	2498.76806	2681.7985	2722.71694	2841.26338	3129.77766	3197.55622	3115.97441	3271.8091	3353.64009	3776.82765	4235.69684	4744.9877	5463.70378	5936.03632	6326.36456	6684.65068	7573.37999	7997.04373	8715.30724
Cook Islands	0.02812	0.05604	0.05513	0.05551	0.05542	0.05539	0.05374	0.05373	0.05373	0.04739	0.04738	0.03862	0.04785	0.04783	0.0478	0.04763	0.04775	0.04775	0.04774	0.04774	0.05729	0.05729	0.05729	0.05728	0.06365	0.07001	0.07469	0.07011	0.09059	0.0731	0.0731	0.0754
Fiji	1.30563	0.88466	1.02168	1.0185	0.75558	0.77663	1.00369	0.77909	0.81477	0.96284	1.05055	0.85755	0.89486	0.95484	1.0047	1.073	1.11361	1.10811	1.06847	1.1833	1.43383	1.52552	1.7632	2.28772	2.63907	2.52662	2.26991	2.49023	2.34417	1.35972	1.33105	1.44473
French Polynesia	0.2109	0.31112	0.41742	0.55477	0.83887	0.72763	0.95866	0.9893	0.98322	0.97503	0.92082	0.91178	0.87443	0.85464	0.69197	0.71374	0.71356	0.71344	0.71329	0.71329	0.67652	0.67654	0.69475	0.86066	0.85777	0.92131	1.02381	1.00913	0.99214	1.06349	1.09638	1.21982
Guam	3.54373	5.00254	3.84191	3.6691	1.26899	0.63093	1.0999	0.76542	0.79699	0.74157	1.83566	2.07664	2.51385	3.35148	4.76173	3.60727	3.21466	3.66089	3.05061	3.42186	2.87128	3.05507	2.09615	2.43267	1.96239	2.06358	2.25959	2.0496	1.77352	1.07054	0.90672	1.10259
Hawaiian Trade Zone	6.34246	7.33791	6.7551	6.4471	7.65868	7.37628	4.54342	NA	NA	NA	NA	NA	NA	NA	NA	NA	NA	NA	NA	NA	NA	NA	NA	NA	NA	NA	NA	NA	NA	NA	NA	NA
Hong Kong	18.17024	18.82631	21.37562	24.94874	26.62235	28.33023	32.13741	36.11053	39.88552	41.40708	40.05502	42.5538	45.13192	48.21915	45.23002	47.37965	48.41484	45.92274	51.65576	61.71965	55.71562	60.25155	66.01416	70.00348	78.06931	80.46686	80.09784	84.12421	78.88333	89.55811	91.87274	92.90875
India	291.22527	337.77611	349.74444	367.40136	421.91298	447.38316	473.73862	486.58518	522.27784	553.47695	578.61869	620.84774	659.37011	690.76355	733.90595	870.23364	814.41588	856.06919	893.43079	951.13723	990.96774	1016.28487	1007.49483	1022.32432	1120.87657	1181.39759	1280.64642	1366.21314	1471.76923	1597.75246	1601.23599	1725.76176
Indonesia	85.79833	91.92724	92.44252	94.21754	98.04478	101.35491	110.19258	117.16868	125.39045	140.1579	155.97903	169.99759	180.42725	200.02132	210.05051	214.82434	238.50155	246.54413	240.43851	264.92303	266.20608	275.3219	285.81208	289.24595	313.94739	330.79493	355.51979	371.95977	370.19055	405.70127	414.54892	426.78954
Japan	947.01434	945.00641	899.7924	867.13384	935.73631	926.24682	877.5253	890.40412	959.76686	989.36875	1046.98292	1066.42158	1073.47265	1064.34265	1118.43193	1116.24029	1134.95314	1157.75101	1113.10929	1156.37645	1201.42927	1193.68892	1199.94533	1249.72008	1256.26116	1241.26229	1239.88936	1254.44044	1216.25207	1104.91381	1179.79865	1180.61513
Kiribati	0.02235	0.02651	0.02656	0.02673	0.0195	0.01952	0.01891	0.02206	0.02206	0.02206	0.02206	0.02612	0.02228	0.02228	0.02228	0.02227	0.02226	0.02226	0.02226	0.02226	0.02544	0.02544	0.03171	0.0317	0.03176	0.03807	0.03805	0.04138	0.04369	0.06237	0.06235	0.05934
Korea, North	110.5128	114.44618	120.27433	125.7373	129.52508	135.43745	134.87723	129.08061	161.19581	129.04944	124.17545	121.1137	105.76563	97.68802	90.52667	83.08368	71.60283	66.35007	59.77952	65.75251	69.40393	71.10661	68.38722	69.97915	71.60173	74.66165	75.7157	62.93854	69.58386	66.62802	64.66897	65.96026
Korea, South	131.73553	137.90447	138.94838	148.48953	163.61681	172.32428	180.29922	185.69014	207.80651	219.50688	242.13184	269.67444	293.46057	330.64101	351.42437	381.43365	396.90281	426.26	380.75153	423.58136	438.65426	450.44829	467.99524	477.8473	485.90995	493.80074	484.21004	503.09967	521.77008	524.43921	581.09961	610.9538
Laos	0.41487	0.16498	0.15157	0.16376	0.15196	0.17156	0.20633	0.20546	0.20268	0.22543	0.22454	0.24439	0.26764	0.2672	0.28784	0.36005	0.44609	0.57127	0.70308	0.8435	0.84534	0.75619	0.94555	0.91574	1.15631	1.18612	1.25688	1.33051	1.41818	1.45311	1.42521	1.40443
Macau	0.46886	0.44022	0.46877	0.66071	0.72803	0.58663	0.90356	1.00144	0.99416	1.06228	1.09044	1.08449	1.13148	1.25071	1.32871	1.28617	1.47644	1.50235	1.6242	1.73246	1.57788	1.66013	1.83729	1.90244	2.32451	1.98224	2.303	2.30199	2.39395	1.79714	1.51678	1.80545
Malaysia	26.33026	27.49148	28.97487	35.75997	41.80845	44.52485	49.03139	46.14219	47.12512	52.57481	64.98051	67.1076	72.85223	77.25776	86.26498	89.49545	101.74091	102.18988	102.78618	106.47902	117.57432	125.41484	137.63802	144.65554	145.25779	147.60514	150.2426	166.64197	170.84802	175.4414	190.6754	191.44414
Maldives	0.01406	0.01388	0.01384	0.01392	0.05624	0.06245	0.08191	0.08191	0.08823	0.08822	0.09766	0.09766	0.10183	0.12404	0.24252	0.3439	0.35618	0.31473	0.34014	0.34014	0.48319	0.51815	0.95001	1.06798	0.75014	0.602	0.8265	0.93243	0.88832	1.0618	1.0616	1.07077
Mongolia	7.103	6.34679	7.52144	7.79701	7.93336	8.85744	9.76007	10.27055	10.61978	10.07266	9.58423	11.46197	9.88226	8.93249	8.31437	8.7711	6.55362	5.47584	5.48264	5.45854	5.61684	5.73584	6.1257	5.83156	6.19244	6.2513	7.13271	7.37908	7.42255	7.81318	7.99235	10.21165
Nauru	0.12621	0.12746	0.12746	0.12746	0.13214	0.13081	0.14873	0.14872	0.14873	0.14875	0.15527	0.15527	0.16014	0.16014	0.16014	0.16336	0.16333	0.16332	0.1633	0.1633	0.1632	0.1632	0.1697	0.16968	0.17298	0.17615	0.17298	0.17647	0.18592	0.18149	0.18149	0.16876
Nepal	0.47668	0.38104	0.5283	0.53048	0.67698	0.54549	0.69296	0.81899	0.81054	0.80937	0.62942	0.92897	1.11115	1.03867	1.31244	1.39614	1.66627	1.92465	2.79675	3.17968	3.0982	3.24799	2.65605	2.79557	2.79026	3.22247	2.79354	2.91636	2.95019	3.27722	3.54378	3.17291
New Caledonia	1.72019	1.63137	1.15292	1.06488	1.2307	1.28252	1.3765	1.48673	1.44121	1.62802	1.5631	1.70196	1.77129	1.77103	1.72185	1.72117	1.82265	1.67301	1.699	1.67776	1.99916	2.01096	2.29278	2.3799	2.54683	2.48388	2.96291	2.88422	3.18474	2.95339	2.95339	3.02639
New Zealand	20.04018	19.57843	20.69341	21.38981	22.78427	23.07399	25.03951	25.07428	27.6253	27.51961	28.76051	28.89048	29.93641	30.01759	31.56672	30.72239	30.65468	33.68311	32.78343	35.65059	35.83992	38.20021	37.48815	39.59535	40.06176	40.38699	40.76812	39.53562	40.73084	37.41837	37.02598	37.16929
Niue	0.00281	0.00281	0.00281	0.00281	0.00281	0.00287	0.00315	0.00315	0.00315	0.00315	0.00315	0.00315	0.00318	0.00318	0.00318	0.00318	0.00318	0.00318	0.00318	0.00318	0.00318	0.00318	0.00318	0.00318	0.00318	0.00413	0.00477	0.00509	0.00544	0.00345	0.00345	0.00305
Pakistan	33.67436	36.36111	42.41566	41.57043	42.47693	46.60734	50.78731	56.03242	58.21763	62.08641	66.98368	68.08817	70.16798	77.79346	84.9598	87.69051	95.22354	95.79467	97.37388	105.5983	108.14919	103.14854	102.60983	104.55507	109.05768	115.50873	129.92558	140.10869	138.77242	141.01884	141.8863	139.66443
Papua New Guinea	1.71931	1.71524	1.71524	1.71524	1.95084	2.05479	2.2878	2.53661	2.37511	2.43005	2.46492	2.4424	2.57499	2.60486	2.4916	2.61735	2.67548	2.67795	2.5808	2.57844	2.59959	2.5996	3.68903	4.2685	4.31183	4.23604	4.30007	4.32091	4.54869	3.23463	3.28344	3.27862
Philippines	33.86376	32.14625	31.89941	30.9747	28.54539	27.09716	28.72238	33.77237	35.65862	40.03625	41.3911	41.70028	46.09045	50.6554	53.1634	57.8252	60.29424	65.74424	66.87724	69.35815	70.87829	71.71361	72.2576	73.97204	76.05266	76.30121	75.20144	73.81891	74.41465	69.35039	78.27515	81.15055
Samoa	0.0929	0.09943	0.10769	0.10769	0.14027	0.11087	0.11644	0.11644	0.11647	0.12283	0.12911	0.12911	0.13362	0.13364	0.12733	0.1367	0.13665	0.13662	0.13657	0.13657	0.14295	0.14295	0.14933	0.14927	0.15563	0.16515	0.16197	0.16587	0.1769	0.16833	0.16833	0.14656
Singapore	29.4139	30.89084	32.68624	32.48649	34.44295	33.44138	41.34473	46.02848	49.00648	53.35277	57.73271	61.17564	68.11151	75.84987	81.88517	82.96833	98.49233	100.25249	104.54146	104.89132	107.64434	111.95998	110.25876	112.66122	126.39769	133.51974	139.7681	148.3495	155.24037	192.37832	228.61664	212.39236
Solomon Islands	0.09768	0.13931	0.12583	0.13951	0.1407	0.1223	0.13219	0.15093	0.16222	0.17085	0.17389	0.17382	0.17238	0.16918	0.16602	0.17163	0.1716	0.17159	0.17155	0.17155	0.17792	0.17792	0.18429	0.18429	0.19066	0.20968	0.19378	0.2133	0.22975	0.19378	0.21235	0.20324
Sri Lanka	4.87856	4.88493	5.06724	5.17624	5.72551	4.80865	5.22008	5.9564	5.22732	4.79884	5.26068	5.28202	5.63375	6.3461	6.67675	7.12989	8.02786	8.94379	8.99076	9.79014	11.3287	11.08015	11.34888	11.72361	11.84578	12.88635	12.74367	13.05646	12.44213	12.89685	11.83923	13.09805
Taiwan	70.63707	63.97477	63.30952	70.88079	81.5391	81.59389	88.54423	91.66399	106.21655	117.26322	118.31089	124.3427	131.65938	150.58079	162.10682	182.42864	197.21327	209.22036	223.61008	225.18516	256.12685	247.83937	273.02054	289.01352	285.20821	288.81832	297.07758	293.61683	290.38297	259.55702	286.89904	293.25528
Thailand	33.56324	34.39728	33.1427	35.55033	39.44479	44.55418	45.50545	51.51013	58.98676	69.96382	83.92848	92.92252	100.77534	114.61158	127.98835	145.12699	170.23501	176.77658	162.70113	171.44265	161.75206	172.03792	187.04917	205.67222	225.4608	241.77711	237.22011	246.84584	255.0851	267.88461	273.09223	269.62279
Timor-Leste (East Timor)	NA	NA	NA	NA	NA	NA	NA	NA	NA	NA	NA	NA	NA	NA	NA	NA	NA	NA	NA	NA	NA	NA	NA	0.28758	0.3027	0.30512	0.3083	0.3374	0.352	0.19068	0.19068	0.21113
Tonga	0.02911	0.04286	0.04005	0.04286	0.04298	0.04468	0.04728	0.06937	0.08109	0.08744	0.08743	0.09762	0.10033	0.10348	0.11612	0.11599	0.12864	0.13178	0.12855	0.12855	0.13175	0.12545	0.11443	0.11438	0.12391	0.14617	0.18113	0.18639	0.20155	0.18586	0.18586	0.1546
U.S. Pacific Islands	0.14736	0.14706	0.14693	0.14692	0.13915	0.12584	0.13229	0.13229	0.17952	0.27963	0.28905	0.28905	0.2951	0.28876	0.28877	0.29737	0.30364	0.2979	0.29716	0.29716	0.29719	0.29719	0.29723	0.29718	0.29721	0.29715	0.30074	0.30918	0.29446	0.30074	0.35276	0.29275
Vanuatu	0.11663	0.10217	0.10263	0.09951	0.10275	0.11115	0.12459	0.11919	0.14032	0.12401	0.13054	0.09619	0.06518	0.06519	0.06521	0.06516	0.06515	0.06514	0.06513	0.06513	0.08424	0.08421	0.09057	0.09055	0.09395	0.10009	0.09691	0.11152	0.11722	0.12478	0.12478	0.14896
Vietnam	13.39865	13.00855	14.17419	14.33387	14.8361	16.80411	14.95535	16.98346	14.8871	16.65251	16.84424	17.41041	17.39176	21.59764	22.93539	29.97254	35.96278	37.93692	40.26382	42.92633	46.11292	49.14527	56.20742	60.23345	68.8667	73.77181	84.45284	90.24243	103.44389	104.67512	121.34995	112.66128
Wake Island	1.23566	1.23297	1.23316	1.23305	1.24368	1.22093	1.28026	1.28001	1.26948	1.26947	1.23719	1.23719	1.26676	1.26629	1.27318	1.28507	1.29113	1.29733	1.29733	1.29733	1.30693	1.3068	1.32903	1.32903	1.32907	1.31956	1.27036	1.37166	1.34309	1.27036	1.28562	1.27486
