# Supplementary material
Source: MDPI journal article supplement (https://www.mdpi.com/1099-4300/15/12/5565)
Supplement: s2 [file s2 › Sources/data/Total Energy Production.csv]

Region	1980	1981	1982	1983	1984	1985	1986	1987	1988	1989	1990	1991	1992	1993	1994	1995	1996	1997	1998	1999	2000	2001	2002	2003	2004	2005	2006	2007	2008	2009	2010
Bermuda	0	0	0	0	0	0	0	0	0	0	0	0	0	0	0	0	0	0	0	0	0	0	0	0	0	0	0	0	0	0	0
Canada	10.27567	10.09397	10.09746	10.3579	11.33985	12.01997	11.92503	12.56707	13.41195	13.32737	13.40615	13.95945	14.4636	15.37952	16.34096	16.83307	17.22615	17.47867	17.43772	17.68126	18.12827	18.02149	18.35776	18.30739	18.66418	18.89322	19.22733	19.5439	19.01963	18.32485	18.3558
Greenland	0	0	0	0	0	0	0	0	0	0	0	0	0	0	0	0	0	0	0	0	0	0	0	0	0	0	0	0	0	0	0
Mexico	5.72474	6.75331	7.8072	7.67598	7.9055	7.84801	7.12104	7.38652	7.38719	7.41127	7.65919	7.97524	7.97549	8.07602	8.15155	8.08957	8.78602	9.09402	9.34467	9.09376	9.37574	9.58779	9.64878	10.09708	10.00562	10.02794	10.30752	9.75793	9.17026	8.61485	8.77764
Saint Pierre and Miquelon	0	0	0	0	0	0	0	0	0	0	0	0	0	0	0	0	0	0	0	0	0	0	0	0	0	0	0	0	0	0	0
United States	67.17577	66.95184	66.56902	64.11473	68.83957	67.6974	67.06656	67.54337	68.92002	69.32086	70.70513	70.36238	69.95571	68.31472	70.72565	71.17437	72.48599	72.47155	72.87642	71.74203	71.33218	71.73429	70.71322	69.96265	70.22242	69.44372	70.75387	71.40003	73.21778	72.64094	74.79513
Antarctica	0	0	0	0	0	0	0	0	0	0	0	0	0	0	0	0	0	0	0	0	0	0	0	0	0	0.00002	0.00002	0.00002	0.00002	0.00004	0.00004
Antigua and Barbuda	0	0	0	0	0	0	0	0	0	0	0	0	0	0	0	0	0	0	0	0	0	0	0	0	0	0	0	0	0	0	0
Argentina	1.59757	1.6708	1.7293	1.78501	1.85245	1.83444	1.84348	1.83397	1.90555	1.98481	2.01466	2.10401	2.28036	2.47743	2.68689	2.91098	3.02718	3.28326	3.37629	3.40713	3.49153	3.65955	3.57399	3.74536	3.755	3.74632	3.8218	3.66273	3.64405	3.55311	3.42873
Aruba	NA	NA	NA	NA	NA	NA	0	0	0	0	0	0	0	0	0	0	0	0	0	0	0	0	0	0	0	0	0	0	0	0.00029	0.00098
Bahamas, The	0	0	0	0	0	0	0	0	0	0	0	0	0	0	0	0	0	0	0	0	0	0	0	0	0	0	0	0	0	0	0
Barbados	0.00037	0.00037	0.00251	0.00256	0.00472	0.0047	0.0047	0.00322	0.00374	0.0034	0.00371	0.0034	0.00371	0.00383	0.00345	0.00375	0.00322	0.003	0.00451	0.00523	0.00436	0.0038	0.00322	0.00322	0.00323	0.00322	0.00329	0.00341	0.00355	0.00238	0.00288
Belize	0.00042	0.00042	0.00042	0.00042	0.00042	0.00042	0.00042	0.00042	0.00041	0.00042	0.00042	0.00042	0.00041	0.00041	0.00041	0.00082	0.00103	0.0011	0.00107	0.00118	0.00136	0.00136	0.00131	0.00104	0.00104	0.00109	0.00688	0.00842	0.00977	0.01262	0.01393
Bolivia	0.14792	0.13575	0.15157	0.1507	0.15659	0.15109	0.14833	0.14822	0.15788	0.16899	0.17032	0.16895	0.17833	0.17348	0.17638	0.19746	0.20112	0.20525	0.21099	0.18601	0.21619	0.27679	0.32105	0.3631	0.50477	0.59087	0.62026	0.65635	0.65736	0.57174	0.63945
Brazil	1.90238	1.99755	2.21678	2.53638	3.04125	3.37817	3.40767	3.44631	3.53616	3.7218	3.75862	3.91162	3.96296	4.09494	4.26429	4.4674	4.83357	5.06074	5.47494	5.87916	6.36028	6.15465	6.70199	7.05625	7.1452	7.67172	8.01022	8.31825	8.56489	8.92527	9.4673
Cayman Islands	0	0	0	0	0	0	0	0	0	0	0	0	0	0	0	0	0	0	0	0	0	0	0	0	0	0	0	0	0	0	0
Chile	0.28095	0.29549	0.2704	0.26663	0.27733	0.28542	0.2684	0.27513	0.27485	0.27416	0.31879	0.3115	0.33835	0.34006	0.33706	0.35828	0.3419	0.344	0.29826	0.22932	0.28219	0.31875	0.31778	0.34394	0.30488	0.38924	0.40649	0.33708	0.36245	0.39076	0.34388
Colombia	0.66083	0.67285	0.74996	0.78786	0.93196	1.0209	1.38934	1.55572	1.61884	1.78465	1.93152	1.87488	1.89984	1.99168	2.01266	2.37845	2.61502	2.84233	3.05122	3.20289	3.0757	3.0826	2.89052	3.11979	3.2301	3.3786	3.61104	3.75504	4.04401	4.19508	4.50611
Costa Rica	0.02179	0.02363	0.02469	0.02951	0.0311	0.02872	0.02994	0.03099	0.03118	0.03429	0.03483	0.03787	0.04157	0.04524	0.04513	0.04128	0.04458	0.05511	0.05	0.06128	0.0693	0.0701	0.0743	0.0731	0.07918	0.07901	0.08019	0.08155	0.08594	0.08576	0.08654
Cuba	0.02426	0.03061	0.03616	0.04105	0.04798	0.05409	0.05749	0.05792	0.05216	0.05269	0.05388	0.05135	0.05771	0.05996	0.07063	0.07323	0.08548	0.11291	0.10118	0.12039	0.13025	0.13816	0.13394	0.1511	0.15802	0.14165	0.14026	0.14544	0.17215	0.16233	0.16891
Dominica	0.00009	0.0001	0.00009	0.00016	0.00017	0.00015	0.00014	0.00015	0.00017	0.00017	0.00017	0.00017	0.00017	0.00016	0.00018	0.0002	0.0002	0.0002	0.00028	0.00033	0.00033	0.00028	0.00031	0.0003	0.00034	0.00027	0.00027	0.00021	0.0002	0.0002	0.0003
Dominican Republic	0.00671	0.00923	0.00869	0.00908	0.00667	0.01122	0.00982	0.01031	0.00898	0.0065	0.00434	0.00603	0.00574	0.01189	0.00591	0.00659	0.00924	0.00721	0.00773	0.0115	0.00808	0.00758	0.00926	0.01268	0.01674	0.01913	0.01765	0.01719	0.01392	0.01458	0.01424
Ecuador	0.46306	0.47481	0.476	0.54282	0.60657	0.66153	0.69176	0.43247	0.71737	0.66711	0.68234	0.71301	0.76344	0.82095	0.87375	0.91937	0.94378	0.92356	0.89684	0.89752	0.95361	0.98458	0.94188	0.98126	1.24176	1.24597	1.26308	1.2298	1.23549	1.17019	1.16721
El Salvador	0.01603	0.01611	0.01737	0.01555	0.01787	0.01666	0.01684	0.01628	0.01784	0.01948	0.01941	0.01334	0.01441	0.01599	0.01652	0.01964	0.02393	0.01963	0.02064	0.02424	0.02009	0.02208	0.0218	0.02579	0.02451	0.02792	0.03199	0.03211	0.03657	0.03168	0.03777
Falkland Islands (Islas Malvinas)	0	0	0	0	0	0	0	0	0	0	0	0	0	0	0	0	0	0	0	0	0	0	0	0	0	0	0	0	0.00002	0.00002	0.00002
French Guiana	0	0	0	0	0	0	0	0	0	0	0	0	0	0	0	0	0	0	0	0	0	0.00548	0.00558	0.00585	0.00594	0.00616	0.00634	0.00655	0.00689	0.00701	0.00722
Grenada	0	0	0	0	0	0	0	0	0	0	0	0	0	0	0	0	0	0	0	0	0	0	0	0	0	0	0	0	0	0	0
Guadeloupe	0	0	0	0	0	0	0.00031	0.00031	0.00031	0.00031	0.00031	0.00031	0.00031	0.00032	0.00032	0.00032	0.00032	0.00036	0.00041	0.00041	0.00051	0.00052	0.00061	0.00154	0.0015	0.0015	0.00149	0.00148	0.00148	0.00146	0.00146
Guatemala	0.01677	0.01497	0.01867	0.02417	0.01774	0.01413	0.02921	0.02689	0.02621	0.03117	0.03376	0.03518	0.03263	0.03861	0.04286	0.0446	0.05166	0.05785	0.07425	0.08185	0.0785	0.07639	0.06705	0.0832	0.09011	0.08892	0.0919	0.08282	0.08477	0.08007	0.08564
Guyana	0.00005	0.00005	0.00005	0.00005	0.00005	0.00005	0.00005	0.00005	0.00005	0.00005	0.00005	0.00005	0.00005	0.00005	0.00005	0.00005	0.00005	0.00005	0.00006	0.00006	0	0	0	0	0	0	0	0	0	0	0
Haiti	0.00238	0.00245	0.0027	0.00282	0.0029	0.00321	0.00349	0.00346	0.00343	0.00346	0.00383	0.0036	0.00329	0.00279	0.00238	0.00258	0.00278	0.00202	0.00309	0.00271	0.00286	0.00289	0.00261	0.00258	0.00258	0.00262	0.00266	0.0015	0.00176	0.002	0.00171
Honduras	0.00802	0.00858	0.00884	0.00874	0.00903	0.00905	0.01329	0.01178	0.01795	0.01904	0.02149	0.02189	0.02244	0.0231	0.01857	0.01708	0.02088	0.02108	0.01942	0.02158	0.02283	0.01957	0.01638	0.01802	0.01464	0.0186	0.02173	0.0231	0.02429	0.0284	0.03
Jamaica	0.00179	0.00179	0.00195	0.00215	0.0014	0.0013	0.0017	0.00194	0.0019	0.00223	0.00215	0.00173	0.00207	0.00222	0.00249	0.00225	0.00236	0.00244	0.00219	0.00222	0.00221	0.00149	0.00126	0.00151	0.00201	0.00236	0.00254	0.00244	0.0023	0.0023	0.0026
Martinique	0	0	0	0	0	0	0	0	0	0	0	0	0	0	0	0	0	0	0	0	0	0	0	0	0	0.00002	0.00002	0.00002	0.00002	0.00002	0.00002
Montserrat	0	0	0	0	0	0	0	0	0	0	0	0	0	0	0	0	0	0	0	0	0	0	0	0	0	0	0	0	0	0	0
Netherlands Antilles	0	0	0	0	0	0	0	0	0	0	0	0	0	0.00001	0.00007	0.00007	0.00007	0.00007	0.00007	0.00007	0.00031	0.00031	0.00031	0.00031	0.0003	0.0003	0.0003	0.0003	0.0003	0.00059	0.00059
Nicaragua	0.00561	0.00547	0.00476	0.00367	0.00556	0.00586	0.00486	0.00623	0.0061	0.00979	0.00817	0.00827	0.00747	0.00911	0.00762	0.00735	0.00742	0.00639	0.00459	0.00536	0.00383	0.00449	0.00616	0.00712	0.00705	0.009	0.00799	0.00777	0.01036	0.00889	0.01152
Panama	0.01034	0.0153	0.0128	0.0105	0.01691	0.02096	0.02276	0.02195	0.0238	0.02322	0.02337	0.02146	0.01984	0.02386	0.02471	0.02484	0.03093	0.02957	0.02184	0.03194	0.03477	0.0258	0.03444	0.02884	0.03773	0.0371	0.03587	0.03662	0.03955	0.03832	0.04122
Paraguay	0.00745	0.00788	0.00706	0.00832	0.00943	0.04247	0.12439	0.19274	0.20544	0.25276	0.28298	0.30648	0.28086	0.32089	0.37187	0.43003	0.46383	0.51415	0.51354	0.52607	0.54021	0.46358	0.48556	0.52488	0.51525	0.50649	0.52815	0.52571	0.54107	0.53103	0.52218
Peru	0.53914	0.55663	0.56237	0.50417	0.53734	0.55963	0.54358	0.51177	0.4549	0.4267	0.40517	0.38458	0.36982	0.42523	0.43894	0.44176	0.42727	0.39696	0.4024	0.38994	0.38713	0.39937	0.40313	0.40186	0.40712	0.47211	0.50517	0.53865	0.5879	0.62269	0.80832
Puerto Rico	0.00212	0.0013	0.00109	0.00116	0.00141	0.00191	0.00233	0.00268	0.00281	0.00284	0.00142	0.00124	0.0014	0.00124	0.0007	0.0009	0.0014	0.00104	0.00105	0.00162	0.00155	0.00137	0.00116	0.00105	0.00141	0.00138	0.00141	0.00162	0.00154	0.0017	0.00149
Saint Kitts and Nevis	0	0	0	0	0	0	0	0	0	0	0	0	0	0	0	0	0	0	0	0	0	0	0	0	0	0	0	0	0	0	0
Saint Lucia	0	0	0	0	0	0	0	0	0	0	0	0	0	0	0	0	0	0	0	0	0	0	0	0	0	0	0	0	0	0	0
Saint Vincent/Grenadines	0.00018	0.00018	0.00019	0.00019	0.00023	0.00027	0.00029	0.00032	0.00036	0.00038	0.00025	0.00014	0.00021	0.00024	0.00022	0.00022	0.00022	0.00021	0.00022	0.00022	0.00026	0.0002	0.00022	0.00022	0.00027	0.00026	0.00023	0.00022	0.00023	0.00022	0.00025
Suriname	0.00917	0.00862	0.01099	0.00751	0.00883	0.01236	0.01251	0.00798	0.01195	0.02057	0.02118	0.02261	0.02643	0.02648	0.02893	0.02934	0.03059	0.0247	0.02934	0.03648	0.03038	0.03056	0.03061	0.03077	0.03079	0.03128	0.03531	0.03975	0.04515	0.04534	0.04535
Trinidad and Tobago	0.55003	0.61244	0.50248	0.48461	0.57552	0.61061	0.52843	0.4952	0.50726	0.50858	0.51505	0.54702	0.51431	0.53455	0.56088	0.58101	0.61576	0.6283	0.62523	0.7314	0.81517	0.8427	0.9435	1.25259	1.35401	1.47733	1.71229	1.75802	1.76304	1.80613	1.85795
Turks and Caicos Islands	0	0	0	0	0	0	0	0	0	0	0	0	0	0	0	0	0	0	0	0	0	0	0	0	0	0	0	0	0	0	0
Uruguay	0.02336	0.02634	0.02531	0.07485	0.07342	0.06669	0.07539	0.07487	0.05538	0.04028	0.07278	0.06374	0.08178	0.07509	0.07685	0.06022	0.05947	0.06589	0.09284	0.05616	0.07157	0.09445	0.09645	0.08688	0.04779	0.06656	0.03581	0.08031	0.05224	0.05897	0.09299
Venezuela	5.76591	5.66743	5.25069	5.03204	5.05581	4.8169	5.21455	5.16944	5.58386	5.76615	6.30585	6.96108	6.9551	7.26089	7.69874	8.07865	8.61848	9.4829	9.44805	8.53973	9.37129	9.22927	8.15865	7.32645	8.06229	8.02834	8.08533	7.64915	7.59524	7.05004	7.00349
Virgin Islands, U.S.	0	0	0	0	0	0	0	0	0	0	0	0	0	0	0	0	0	0	0	0	0	0	0	0	0	0	0	0	0	0	0
Virgin Islands, British	0	0	0	0	0	0	0	0	0	0	0	0	0	0	0	0	0	0	0	0	0	0	0	0	0	0	0	0	0	0	0
Albania	0.15556	0.15826	0.20594	0.23428	0.19082	0.19173	0.1966	0.20228	0.18613	0.19463	0.12711	0.09511	0.06442	0.06284	0.06766	0.06778	0.0827	0.07317	0.06576	0.06754	0.06085	0.05137	0.05187	0.06976	0.07157	0.07103	0.06866	0.04305	0.05283	0.06405	0.09844
Austria	0.47051	0.46393	0.46539	0.45463	0.43889	0.45569	0.45495	0.39712	0.49775	0.4985	0.46314	0.46927	0.49498	0.51172	0.49048	0.51853	0.48535	0.49279	0.51301	0.548	0.55978	0.55187	0.55051	0.49011	0.5148	0.50407	0.51381	0.54143	0.54093	0.56751	0.54973
Belgium	0.28175	0.39753	0.42596	0.47825	0.52898	0.59126	0.60838	0.58124	0.51676	0.49986	0.47835	0.4732	0.46352	0.44328	0.4257	0.4332	0.4496	0.48784	0.47608	0.50818	0.50312	0.48353	0.49155	0.48952	0.4943	0.4987	0.49754	0.51909	0.50221	0.53037	0.54758
Bosnia and Herzegovina	NA	NA	NA	NA	NA	NA	NA	NA	NA	NA	NA	NA	0.16728	0.13819	0.0476	0.08254	0.07641	0.12359	0.14306	0.15115	0.17616	0.17774	0.1897	0.19282	0.20527	0.20778	0.2197	0.19808	0.23048	0.24696	0.253
Bulgaria	0.33975	0.36186	0.39343	0.4149	0.42863	0.40701	0.42949	0.44638	0.45712	0.4551	0.41266	0.3523	0.33124	0.34806	0.35646	0.39967	0.43258	0.41631	0.41817	0.37248	0.40542	0.40542	0.42746	0.39759	0.38828	0.40611	0.42059	0.38788	0.39827	0.38552	0.42187
Croatia	NA	NA	NA	NA	NA	NA	NA	NA	NA	NA	NA	NA	0.20176	0.21109	0.21515	0.20963	0.21586	0.1879	0.19221	0.18817	0.18173	0.18978	0.1652	0.17121	0.17905	0.16573	0.15939	0.15491	0.16152	0.17783	0.18895
Cyprus	0	0	0	0	0	0	0	0	0	0	0	0	0	0	0	0	0	0	0	0	0	0	0	0	0	0.00001	0.00001	0.00003	0.00014	0.0001	0.00118
Czech Republic	NA	NA	NA	NA	NA	NA	NA	NA	NA	NA	NA	NA	NA	1.20062	1.11561	1.0606	1.11301	0.89473	0.84072	0.76037	0.81381	0.83901	0.86848	0.9154	0.90973	0.89783	0.92133	1.0685	1.05125	1.00594	1.02311
Denmark	0.01278	0.0314	0.07281	0.09551	0.10792	0.16822	0.23852	0.30512	0.31139	0.36698	0.38207	0.46097	0.51351	0.55643	0.59513	0.61495	0.70895	0.8169	0.83987	0.98184	1.1449	1.11831	1.17875	1.18428	1.28484	1.30134	1.21929	1.11977	1.1007	0.97579	0.96039
Faroe Islands	0.00051	0.00051	0.00051	0.00052	0.00051	0.00051	0.00051	0.00051	0.00064	0.00074	0.00077	0.00077	0.00086	0.00076	0.00078	0.00078	0.00073	0.00077	0.00079	0.00072	0.00077	0.00078	0.00098	0.0009	0.00101	0.00108	0.00114	0.00118	0.00106	0.00104	0.00078
Finland	0.17443	0.2847	0.2995	0.31471	0.32141	0.31393	0.31468	0.33441	0.32778	0.32125	0.35467	0.37903	0.39396	0.39359	0.37684	0.38657	0.37393	0.40186	0.46293	0.44161	0.45564	0.44327	0.418	0.41639	0.47752	0.4606	0.44504	0.4677	0.49623	0.44073	0.45782
Former Czechoslovakia	1.66636	1.64526	1.67563	1.72966	1.77445	1.80665	1.87446	1.91643	1.90232	1.84288	1.6751	1.55915	1.48033	NA	NA	NA	NA	NA	NA	NA	NA	NA	NA	NA	NA	NA	NA	NA	NA	NA	NA
Former Serbia and Montenegro	NA	NA	NA	NA	NA	NA	NA	NA	NA	NA	NA	NA	0.53634	0.51561	0.49311	0.44361	0.59975	0.58052	0.59725	0.49505	0.53768	0.54541	0.5528	0.54196	0.55085	0.5206	NA	NA	NA	NA	NA
Former Yugoslavia	1.04746	1.14904	1.1843	1.22998	1.35369	1.42134	1.46354	1.44013	1.45955	1.44267	1.3885	1.29072	NA	NA	NA	NA	NA	NA	NA	NA	NA	NA	NA	NA	NA	NA	NA	NA	NA	NA	NA
France	2.33296	2.66161	2.62741	2.96622	3.3718	3.5489	3.80346	3.95824	4.04951	4.03841	4.24685	4.44925	4.6134	4.83851	4.86432	4.94188	5.0287	4.92414	4.77703	4.92164	5.02484	5.14588	5.13049	5.15313	5.1695	5.10224	5.14042	5.06872	5.13225	4.79201	5.06788
Germany	NA	NA	NA	NA	NA	NA	NA	NA	NA	NA	NA	6.3591	6.17629	5.84931	5.71644	5.66677	5.49839	5.5714	5.26857	5.31983	5.32689	5.29479	5.3131	5.30126	5.3846	5.26697	5.27371	5.20216	5.03071	4.74467	4.7991
Germany, East	2.423	2.50096	2.55479	2.60895	2.77718	2.92252	2.88311	2.85581	2.87731	2.78734	2.48737	NA	NA	NA	NA	NA	NA	NA	NA	NA	NA	NA	NA	NA	NA	NA	NA	NA	NA	NA	NA
Germany, West	4.77949	4.919	4.93276	4.81234	5.02623	5.3512	5.16001	5.1942	5.24192	5.12603	5.05376	NA	NA	NA	NA	NA	NA	NA	NA	NA	NA	NA	NA	NA	NA	NA	NA	NA	NA	NA	NA
Gibraltar	0	0	0	0	0	0	0	0	0	0	0	0	0	0	0	0	0	0	0	0	0	0	0	0	0	0	0	0	0	0	0
Greece	0.17449	0.21675	0.25165	0.26604	0.28754	0.30472	0.32362	0.35638	0.36877	0.37665	0.37067	0.39023	0.33158	0.35184	0.34717	0.35758	0.35231	0.38478	0.39526	0.38672	0.39963	0.39456	0.40484	0.41609	0.4174	0.41723	0.40406	0.37976	0.38709	0.40622	0.39041
Hungary	0.59967	0.59552	0.625	0.63092	0.65526	0.68746	0.67844	0.70189	0.69452	0.66335	0.60705	0.56841	0.5575	0.52719	0.52941	0.52204	0.5147	0.5267	0.47918	0.45884	0.45343	0.44885	0.41802	0.39141	0.39692	0.40015	0.39574	0.38472	0.38848	0.40745	0.40498
Iceland	0.03223	0.03363	0.03737	0.03966	0.04094	0.0402	0.04239	0.04326	0.04557	0.04667	0.04641	0.04639	0.04651	0.04822	0.04879	0.05079	0.05242	0.05648	0.06343	0.07284	0.07768	0.08228	0.08484	0.08626	0.08567	0.0861	0.09773	0.11753	0.16103	0.16308	0.16518
Ireland	0.04282	0.0604	0.08291	0.08823	0.09175	0.09784	0.07078	0.0678	0.08177	0.08956	0.0906	0.09257	0.09219	0.10319	0.10644	0.10681	0.10346	0.0922	0.07385	0.06004	0.05552	0.04045	0.04353	0.03629	0.04429	0.03905	0.04258	0.04383	0.05086	0.05405	0.05024
Italy	1.08469	1.11703	1.16611	1.11838	1.16586	1.16672	1.25363	1.19188	1.26337	1.18802	1.18699	1.28485	1.31793	1.34769	1.42142	1.35838	1.42766	1.41925	1.40315	1.34437	1.32441	1.29522	1.22013	1.18062	1.25546	1.19173	1.16001	1.08257	1.14737	1.1659	1.28897
Luxembourg	0.00119	0.00134	0.00122	0.00121	0.00128	0.00109	0.00121	0.00149	0.00146	0.00113	0.00108	0.00126	0.00104	0.00109	0.00163	0.00144	0.00104	0.00134	0.00173	0.00159	0.00206	0.00208	0.00187	0.00172	0.00229	0.00239	0.00278	0.003	0.00317	0.003	0.00304
Macedonia	NA	NA	NA	NA	NA	NA	NA	NA	NA	NA	NA	NA	0.06949	0.06584	0.06719	0.07159	0.07121	0.07484	0.08315	0.0792	0.06223	0.06078	0.06131	0.06621	0.06602	0.06351	0.06323	0.05599	0.06224	0.06487	0.07109
Malta	0	0	0	0	0	0	0	0	0	0	0	0	0	0	0	0	0	0	0	0	0	0	0	0	0	0	0	0	0	0.00001	0.00002
Montenegro	NA	NA	NA	NA	NA	NA	NA	NA	NA	NA	NA	NA	NA	NA	NA	NA	NA	NA	NA	NA	NA	NA	NA	NA	NA	NA	0.03057	0.02321	0.03042	0.02848	0.04397
Netherlands	3.15555	2.93671	2.53892	2.72447	2.76318	2.92124	2.7408	2.73001	2.4225	2.60429	2.63501	2.95075	2.92717	2.97687	2.91287	2.90712	3.24814	2.88062	2.76941	2.55531	2.47272	2.62971	2.61547	2.52719	2.94062	2.7042	2.65197	2.646	2.88505	2.72398	3.02291
Norway	2.92913	3.02015	3.01558	3.43669	3.67444	3.77109	3.91	4.33576	4.68478	5.58781	5.80362	6.17502	6.86308	7.12045	7.77376	8.34888	9.26151	9.58339	9.33133	9.53233	10.29967	10.30065	10.68987	10.64352	10.79273	10.65661	10.12339	9.91874	10.12592	9.87777	9.44588
Poland	4.78572	4.08336	4.65675	4.72645	4.80354	4.86512	4.9189	4.97737	4.97228	4.60421	3.86027	3.7221	3.65886	3.6713	3.72343	3.58836	3.82824	3.83374	3.35664	3.50316	3.05651	3.07383	3.07707	3.05648	3.0363	2.96598	2.89804	2.72128	2.65802	2.51188	2.50051
Portugal	0.08783	0.05765	0.0777	0.09014	0.10718	0.11913	0.09723	0.10414	0.13441	0.07043	0.10539	0.10565	0.05983	0.0993	0.12103	0.09597	0.16176	0.14401	0.14299	0.08851	0.13274	0.16384	0.10088	0.18254	0.1251	0.08517	0.15789	0.16213	0.14643	0.18063	0.27824
Romania	2.2898	2.35684	2.47625	2.57569	2.51444	2.41449	2.48679	2.48799	2.47888	2.28382	1.87267	1.62151	1.50616	1.45788	1.42327	1.44876	1.43002	1.40253	1.25241	1.20713	1.19067	1.25059	1.20088	1.13888	1.14455	1.15166	1.17748	1.16289	1.19168	1.13885	1.14168
Serbia	NA	NA	NA	NA	NA	NA	NA	NA	NA	NA	NA	NA	NA	NA	NA	NA	NA	NA	NA	NA	NA	NA	NA	NA	NA	NA	0.51474	0.50476	0.51997	0.53731	0.56004
Slovakia	NA	NA	NA	NA	NA	NA	NA	NA	NA	NA	NA	NA	NA	0.23196	0.2422	0.23676	0.23512	0.22558	0.23146	0.24543	0.28355	0.29535	0.30525	0.28407	0.27451	0.28198	0.2847	0.2515	0.26603	0.24031	0.25379
Slovenia	NA	NA	NA	NA	NA	NA	NA	NA	NA	NA	NA	NA	0.13456	0.12521	0.12975	0.13854	0.13855	0.13672	0.13838	0.13866	0.13907	0.14005	0.14484	0.13955	0.15139	0.14602	0.14345	0.14025	0.1546	0.15413	0.15245
Spain	0.86618	0.91924	1.02635	1.13214	1.28212	1.3315	1.36727	1.35649	1.48623	1.43904	1.42504	1.43464	1.34103	1.33401	1.32682	1.18776	1.34779	1.27961	1.30495	1.2568	1.33594	1.51374	1.33535	1.51364	1.46138	1.28833	1.39109	1.38327	1.39127	1.42555	1.722
Sweden	0.87311	0.98832	0.95362	1.07081	1.20975	1.30937	1.31774	1.40352	1.39002	1.39142	1.41575	1.41002	1.3929	1.37407	1.3293	1.39111	1.26501	1.39885	1.49598	1.45974	1.39141	1.54579	1.37188	1.24485	1.4272	1.50711	1.35047	1.40854	1.41629	1.27967	1.36035
Switzerland	0.47541	0.51526	0.52227	0.52057	0.49033	0.5489	0.55892	0.58063	0.59973	0.54193	0.55368	0.56842	0.57927	0.60849	0.65386	0.61329	0.55185	0.60642	0.60541	0.67387	0.64805	0.70332	0.6398	0.64097	0.61809	0.55827	0.59904	0.64066	0.64597	0.63927	0.63019
Turkey	0.42914	0.46927	0.51297	0.49122	0.54243	0.61885	0.70011	0.77913	0.80585	0.81742	0.85381	0.8705	0.94822	0.98966	0.94924	0.98529	1.04515	1.09851	1.16474	1.05768	1.00392	0.89666	0.9431	0.91919	1.00106	1.06457	1.15442	1.17343	1.19349	1.2319	1.35082
United Kingdom	8.65992	8.96749	9.5911	10.09708	8.8077	10.20138	10.64475	10.34599	10.00148	9.02875	9.00071	9.3107	9.11058	9.41593	10.20971	10.78276	11.56496	11.33258	11.53202	11.89134	11.08667	11.16134	10.99953	10.48221	9.40022	8.56018	7.79401	7.3094	6.9551	6.58007	6.17228
Armenia	NA	NA	NA	NA	NA	NA	NA	NA	NA	NA	NA	NA	0.03116	0.0438	0.03589	0.01959	0.04071	0.03082	0.03217	0.03654	0.0343	0.0332	0.0412	0.04143	0.04568	0.04692	0.04633	0.04568	0.04498	0.04733	0.05249
Azerbaijan	NA	NA	NA	NA	NA	NA	NA	NA	NA	NA	NA	NA	0.77937	0.71728	0.6616	0.64496	0.65114	0.61945	0.73061	0.84005	0.83656	0.88026	0.87882	0.90504	0.88762	1.18145	1.65684	2.23326	2.51491	2.78701	2.87242
Belarus	NA	NA	NA	NA	NA	NA	NA	NA	NA	NA	NA	NA	0.09672	0.09666	0.09632	0.09377	0.08944	0.08557	0.08657	0.08654	0.08726	0.08704	0.08559	0.08427	0.08513	0.08208	0.08262	0.0822	0.08208	0.07815	0.07494
Estonia	NA	NA	NA	NA	NA	NA	NA	NA	NA	NA	NA	NA	0.17355	0.10059	0.10139	0.09128	0.13553	0.11215	0.10403	0.08923	0.09791	0.09884	0.10363	0.12459	0.1172	0.12269	0.11874	0.13929	0.13624	0.12976	0.15962
Former U.S.S.R.	56.46276	56.85634	58.73827	60.25127	63.32875	65.26372	67.73998	69.72014	72.26761	71.89522	72.11085	66.43792	NA	NA	NA	NA	NA	NA	NA	NA	NA	NA	NA	NA	NA	NA	NA	NA	NA	NA	NA
Georgia	NA	NA	NA	NA	NA	NA	NA	NA	NA	NA	NA	NA	0.07624	0.07446	0.07644	0.05586	0.06428	0.06919	0.07146	0.07241	0.06583	0.06323	0.07191	0.07305	0.06518	0.06663	0.05485	0.06946	0.07256	0.07692	0.0949
Kazakhstan	NA	NA	NA	NA	NA	NA	NA	NA	NA	NA	NA	NA	3.64083	3.26044	2.60841	2.32566	2.40957	2.47204	2.4282	2.62636	3.38294	3.68688	3.98398	4.16245	4.65221	4.8642	5.13403	5.28115	5.54924	5.56977	5.82175
Kyrgyzstan	NA	NA	NA	NA	NA	NA	NA	NA	NA	NA	NA	NA	0.13306	0.12112	0.13597	0.12541	0.13669	0.12263	0.11087	0.13319	0.14957	0.1394	0.11938	0.14731	0.15075	0.15162	0.1563	0.14522	0.11543	0.10751	0.11112
Latvia	NA	NA	NA	NA	NA	NA	NA	NA	NA	NA	NA	NA	0.02583	0.02934	0.03375	0.02999	0.01905	0.02986	0.03051	0.02793	0.02851	0.02905	0.02502	0.02371	0.03172	0.03381	0.02737	0.02769	0.03135	0.03436	0.03512
Lithuania	NA	NA	NA	NA	NA	NA	NA	NA	NA	NA	NA	NA	0.15108	0.13805	0.08892	0.12408	0.14492	0.1269	0.15326	0.11404	0.10159	0.13895	0.16583	0.17688	0.17038	0.11869	0.09979	0.11192	0.11258	0.12086	0.01313
Moldova	NA	NA	NA	NA	NA	NA	NA	NA	NA	NA	NA	NA	0.00746	0.00715	0.0049	0.0039	0.00429	0.00456	0.00096	0.00092	0.00058	0.00074	0.00122	0.00065	0.00058	0.00062	0.0026	0.00033	0.0008	0.00053	0.00076
Russia	NA	NA	NA	NA	NA	NA	NA	NA	NA	NA	NA	NA	47.99039	44.68718	42.30319	41.41806	39.94612	38.7414	39.0652	40.80881	41.69541	42.6263	44.16275	47.18234	49.86482	51.07959	52.05575	52.55992	52.54599	50.4291	53.22323
Tajikistan	NA	NA	NA	NA	NA	NA	NA	NA	NA	NA	NA	NA	0.17322	0.17934	0.17471	0.15243	0.15436	0.14171	0.14642	0.15975	0.14321	0.14832	0.15479	0.16873	0.16582	0.17186	0.16788	0.17213	0.16926	0.15824	0.15868
Turkmenistan	NA	NA	NA	NA	NA	NA	NA	NA	NA	NA	NA	NA	2.34412	2.58223	1.49372	1.36122	1.54939	1.15967	0.74996	1.14739	2.04777	2.13305	2.38175	2.60554	2.61661	2.66389	2.62798	2.83698	2.91382	1.77312	2.03627
Ukraine	NA	NA	NA	NA	NA	NA	NA	NA	NA	NA	NA	NA	4.03475	3.69069	3.22211	3.3142	3.0448	3.02061	3.0417	3.04805	3.04794	3.05833	3.05747	3.19921	3.21008	3.2314	3.29192	3.22316	3.21639	3.0739	3.08873
Uzbekistan	NA	NA	NA	NA	NA	NA	NA	NA	NA	NA	NA	NA	1.78593	1.90014	2.04044	2.14555	2.1533	2.17794	2.3863	2.38508	2.4104	2.65369	2.45486	2.46131	2.54567	2.50468	2.59007	2.66543	2.79091	2.54626	2.5095
Bahrain	0.22023	0.23687	0.24305	0.25079	0.24159	0.27123	0.2954	0.33089	0.29706	0.29963	0.31258	0.33331	0.28675	0.351	0.34785	0.34311	0.33392	0.39892	0.40301	0.40835	0.41491	0.42459	0.44511	0.45209	0.45737	0.47654	0.50043	0.51664	0.5396	0.54188	0.5492
Iran	3.94373	3.2865	5.1356	5.67815	5.30488	5.5867	5.06388	5.66893	5.70867	7.01523	7.67034	8.26544	8.52727	8.83295	9.16213	9.34723	9.64608	9.83963	9.89555	9.99916	10.39818	10.66825	10.44413	11.35726	12.05583	13.11545	13.12405	12.9965	13.35729	14.25932	14.60561
Iraq	5.44998	2.16341	2.18917	2.16796	2.61053	3.09038	3.65927	4.5772	5.97032	6.47154	4.54242	0.69195	1.0183	1.21122	1.32841	1.35231	1.39037	2.60395	4.7062	5.475	5.62238	5.21719	4.42167	2.84408	4.37814	4.12414	4.39253	4.56197	5.18267	5.17126	5.20917
Israel	0.08111	0.08307	0.00528	0.00424	0.00425	0.00424	0.00361	0.00292	0.00234	0.00217	0.00156	0.0016	0.00149	0.00174	0.00163	0.00121	0.00142	0.00163	0.00142	0.00112	0.00086	0.00075	0.00089	0.00128	0.02807	0.0271	0.0352	0.04128	0.05203	0.04342	0.05714
Jordan	0	0	0	0	0	0	0.00221	0.00129	0.00137	0.00361	0.00571	0.00554	0.00582	0.0077	0.01056	0.01098	0.01029	0.01101	0.01058	0.01061	0.01124	0.01128	0.01212	0.01202	0.01212	0.01077	0.01216	0.00976	0.00832	0.00863	0.00865
Kuwait	3.98985	2.62777	1.94451	2.51342	2.76084	2.44003	3.36252	3.76674	3.62745	4.31565	2.83247	0.42947	2.44216	4.28436	4.72709	4.81243	4.94199	4.84719	5.01541	4.59658	5.0356	4.81399	4.58056	5.14197	5.70635	6.10784	6.12513	5.97294	6.28005	5.6817	5.62367
Lebanon	0.00874	0.00879	0.00672	0.00583	0.00604	0.00605	0.00579	0.00629	0.00613	0.00516	0.00309	0.00517	0.00564	0.00735	0.00835	0.00732	0.00817	0.00911	0.00792	0.00336	0.00454	0.00341	0.00683	0.01382	0.01111	0.01036	0.00682	0.00572	0.00364	0.00601	0.00811
Oman	0.63842	0.72125	0.74034	0.86006	0.94353	1.13109	1.2796	1.34033	1.41194	1.49303	1.58777	1.64273	1.72201	1.81675	1.90235	1.99453	2.06667	2.13079	2.19684	2.16611	2.42716	2.47904	2.48393	2.34919	2.25829	2.38494	2.44763	2.3978	2.50239	2.64139	2.83647
Palestinian Territories	NA	NA	NA	NA	NA	NA	NA	NA	NA	NA	NA	NA	NA	NA	NA	NA	NA	0	0	0	0	0	0	0	0	0	0	0	0	0	0
Qatar	1.1995	1.05173	0.93208	0.8389	1.09073	0.87617	0.88195	0.85843	0.98986	1.05965	1.2004	1.24548	1.39076	1.44609	1.44338	1.50724	1.65525	1.89992	2.30829	2.37092	2.81917	2.71167	2.74406	2.9468	3.44967	3.92422	4.16911	4.61907	5.32855	5.82077	6.55231
Saudi Arabia	22.43421	22.43699	15.10441	11.92263	11.28964	8.64186	12.03622	10.84182	12.85643	12.80877	15.92029	19.74695	20.39209	20.108	20.39034	20.65907	20.81526	21.2433	21.41514	20.17832	21.59311	20.94557	20.26962	23.0489	24.15902	25.44005	24.61052	23.73599	25.16818	22.83698	24.74423
Syria	0.41093	0.4091	0.39891	0.41301	0.42618	0.43947	0.47585	0.56909	0.64495	0.82995	1.00242	1.25601	1.23646	1.40996	1.4264	1.43832	1.51129	1.47877	1.50249	1.47965	1.46229	1.36589	1.4207	1.40259	1.3801	1.28683	1.23044	1.15751	1.12626	1.13277	1.22779
United Arab Emirates	3.88781	3.45406	2.99906	2.90859	3.0035	3.29178	3.67804	4.20936	4.22196	4.9942	5.51239	6.24061	6.11006	5.78346	5.83578	6.14019	6.34013	6.50094	6.60659	6.25346	6.76686	6.59336	6.49905	7.12961	7.42447	7.59008	7.86848	7.91494	8.12802	7.5188	7.64098
Yemen	0	0	0	0	0	0	0.02085	0.04193	0.3627	0.40564	0.40331	0.41078	0.38153	0.45974	0.70005	0.72086	0.71336	0.75733	0.81039	0.85469	0.91729	0.92129	0.91812	0.89731	0.84735	0.83619	0.78345	0.66597	0.62513	0.62592	0.7781
Algeria	2.80332	3.03742	3.22547	3.60602	3.85789	3.9071	3.96829	4.21747	4.29745	4.50276	4.75332	4.91623	5.03106	4.88426	4.7356	5.0482	5.24834	5.59212	5.74876	6.01955	6.19057	6.17016	6.39056	6.78907	6.90113	7.47971	7.41833	7.32433	7.37697	7.06014	7.12205
Angola	0.33508	0.29133	0.27626	0.39581	0.46249	0.51127	0.62143	0.78933	0.98944	0.99075	1.03779	1.09201	1.15235	1.11255	1.16856	1.40407	1.54205	1.54876	1.59583	1.61454	1.62241	1.60922	1.94122	1.95654	2.29303	2.72101	3.09019	3.80233	4.33183	4.17418	4.25945
Benin	0	0	0	0.00896	0.01573	0.01793	0.01793	0.01569	0.01124	0.00897	0.00897	0.00897	0.01258	0.01295	0.01329	0.00673	0.00451	0.00298	0.00226	0.00226	0.00157	0.00159	0.00181	0.00092	0.00001	0.00001	0.00005	0.00004	0.00004	0.00002	0.00002
Botswana	0.009	0.00922	0.01004	0.00958	0.00953	0.0106	0.01211	0.01405	0.01486	0.01608	0.01926	0.01901	0.02186	0.02158	0.02183	0.02496	0.02053	0.01991	0.02378	0.02421	0.02427	0.02383	0.02442	0.02109	0.02339	0.02524	0.02465	0.02122	0.02332	0.01891	0.02532
Burkina Faso	0	0	0	0	0	0	0	0	0	0	0.00009	0.00014	0.00021	0.00048	0.00074	0.00097	0.00118	0.00117	0.0008	0.00126	0.00099	0.00055	0.00065	0.00098	0.00101	0.00099	0.00079	0.00109	0.00133	0.00128	0.00117
Burundi	0.00002	0.00002	0.00002	0.00024	0.00041	0.00048	0.00064	0.00098	0.00106	0.00106	0.00111	0.00115	0.00108	0.00111	0.00118	0.00121	0.00121	0.00123	0.00111	0.00099	0.001	0.00118	0.00128	0.00102	0.0009	0.00095	0.00091	0.00115	0.00109	0.00117	0.00146
Cameroon	0.14028	0.20759	0.25784	0.26857	0.31588	0.42564	0.40828	0.40175	0.38056	0.39624	0.37669	0.36038	0.33271	0.30251	0.26182	0.2691	0.26449	0.30049	0.29309	0.25088	0.21945	0.20194	0.18362	0.18123	0.18255	0.21604	0.2329	0.21894	0.21981	0.20718	0.1904
Cape Verde	0	0	0	0	0	0	0	0	0	0	0	0	0	0.00002	0.00005	0.00006	0.00007	0.00007	0.00008	0.00008	0.00008	0.00006	0.00006	0.00005	0.00006	0.00006	0.00007	0.00007	0.00006	0.00007	0.00007
Central African Republic	0.00069	0.00068	0.00071	0.00067	0.00072	0.00063	0.00079	0.00076	0.00076	0.00077	0.00079	0.00078	0.0008	0.00079	0.00081	0.00082	0.00084	0.00085	0.00083	0.00083	0.00085	0.00085	0.00083	0.00085	0.00124	0.00133	0.00138	0.00134	0.00134	0.00132	0.00132
Chad	0	0	0	0	0	0	0	0	0	0	0	0	0	0	0	0	0	0	0	0	0	0	0	0.08215	0.38959	0.40236	0.35967	0.32844	0.29002	0.26192	0.28736
Comoros	0.00002	0.00002	0.00002	0.00002	0.00002	0.00002	0.00002	0.00002	0.00002	0.00002	0.00002	0.00002	0.00002	0.00002	0.00002	0.00002	0.00002	0.00002	0.00002	0.00002	0.00002	0.00002	0.00003	0.00004	0.00005	0.00005	0.00005	0.00005	0.00005	0.00005	0.00005
Congo (Brazzaville)	0.13906	0.1768	0.19021	0.18668	0.25929	0.25826	0.25424	0.26445	0.30758	0.35009	0.35315	0.33406	0.37245	0.3856	0.38304	0.40021	0.42988	0.55731	0.581	0.5927	0.61463	0.55982	0.54721	0.53852	0.51381	0.5022	0.52947	0.46191	0.52161	0.5985	0.69223
Congo (Kinshasa)	0.09029	0.08974	0.09525	0.10326	0.12055	0.12598	0.12617	0.12593	0.12215	0.12386	0.12221	0.11652	0.12015	0.11249	0.11234	0.12988	0.12946	0.11392	0.10656	0.1037	0.11894	0.11509	0.11273	0.11229	0.1183	0.11857	0.11985	0.12725	0.11919	0.12592	0.12437
Cote dIvoire (IvoryCoast)	0.01613	0.03311	0.03748	0.06075	0.06215	0.07434	0.05539	0.05143	0.03858	0.01735	0.01792	0.01727	0.01397	0.01228	0.02667	0.03691	0.07312	0.08159	0.08654	0.0996	0.09255	0.09202	0.09062	0.10686	0.12051	0.14526	0.1954	0.18372	0.20399	0.20269	0.1641
Djibouti	0	0	0	0	0	0	0	0	0	0	0	0	0	0	0	0	0	0	0	0	0	0	0	0	0	0	0	0	0	0	0
Egypt	1.45253	1.48126	1.69107	1.84143	2.07993	2.23297	2.09272	2.29913	2.23788	2.31967	2.3613	2.39558	2.38828	2.48069	2.52162	2.59908	2.64948	2.51307	2.47665	2.59377	2.54665	2.69116	2.66743	2.85199	2.85779	3.12929	3.19001	3.24947	3.76189	3.92275	3.85434
Equatorial Guinea	0.00002	0.00002	0.00002	0.00002	0.00002	0.00002	0.00002	0.00002	0.00002	0.00002	0.00002	0.00022	0.00312	0.009	0.00999	0.00999	0.0342	0.10458	0.1663	0.20419	0.3361	0.36298	0.47093	0.45991	0.7387	0.79029	0.7615	0.83106	0.92684	0.90958	0.87262
Eritrea	NA	NA	NA	NA	NA	NA	NA	NA	NA	NA	NA	NA	NA	NA	0	0	0	0.00001	0.00001	0.00001	0.00001	0.00001	0.00001	0.00001	0.00001	0.00001	0.00002	0.00002	0.00002	0.00002	0.00002
Ethiopia	0.00491	0.00525	0.006	0.00655	0.00713	0.0078	0.00858	0.00923	0.00987	0.01037	0.01132	0.01145	0.01166	0.0129	0.01382	0.01458	0.01546	0.01583	0.0162	0.01645	0.01668	0.02038	0.02038	0.02311	0.02501	0.02805	0.032	0.03312	0.03229	0.03429	0.04781
Gabon	0.38239	0.331	0.34239	0.34865	0.3502	0.37864	0.36474	0.34436	0.35325	0.45758	0.5907	0.64295	0.65255	0.68263	0.71751	0.7963	0.80548	0.80801	0.76846	0.72355	0.68997	0.59228	0.55256	0.53136	0.52779	0.58404	0.52275	0.53563	0.54639	0.53186	0.53917
Gambia, The	0	0	0	0	0	0	0	0	0	0	0	0	0	0	0	0	0	0	0	0	0	0	0	0	0	0	0	0	0	0	0
Ghana	0.05913	0.06014	0.05596	0.03114	0.0231	0.03345	0.0465	0.04821	0.04967	0.05402	0.05892	0.0634	0.06996	0.06767	0.06527	0.07091	0.08086	0.0801	0.0495	0.06533	0.08196	0.08278	0.06589	0.05455	0.0676	0.06872	0.06818	0.04947	0.07347	0.07945	0.08314
Guinea	0.00154	0.00155	0.00155	0.00161	0.00162	0.00168	0.0017	0.00172	0.00173	0.00177	0.0018	0.00184	0.00184	0.00186	0.00188	0.00197	0.00202	0.00291	0.00313	0.004	0.00414	0.00564	0.00599	0.00406	0.0055	0.00489	0.00452	0.00527	0.00516	0.00505	0.00506
Guinea-Bissau	0	0	0	0	0	0	0	0	0	0	0	0	0	0	0	0	0	0	0	0	0	0	0	0	0	0	0	0	0	0	0
Kenya	0.01228	0.01613	0.01691	0.01957	0.01931	0.02237	0.02334	0.02418	0.02874	0.0306	0.03161	0.03388	0.03365	0.03562	0.03528	0.03757	0.03965	0.03793	0.03827	0.02982	0.02098	0.03281	0.03856	0.04434	0.042	0.04316	0.04537	0.04734	0.04254	0.03727	0.05054
Lesotho	0	0	0	0	0	0	0	0	0	0	0	0	0	0	0	0	0	0	0	0.00199	0.00294	0.00294	0.00319	0.00333	0.00298	0.00347	0.00196	0.00196	0.00197	0.00195	0.00195
Liberia	0.00344	0.00328	0.00343	0.00337	0.00233	0.00271	0.00329	0.00329	0.00331	0.00324	0	0	0	0	0	0	0	0	0	0	0	0	0	0	0	0	0	0	0	0	0
Libya	4.02923	2.57372	2.61321	2.52341	2.52606	2.46198	2.43448	2.29436	2.73466	2.70148	3.18319	3.43161	3.34229	3.16907	3.20515	3.22788	3.27629	3.386	3.26037	3.06773	3.29768	3.20746	3.11209	3.30084	3.60892	3.99044	4.22291	4.36583	4.46458	4.27305	4.30594
Madagascar	0.00152	0.00159	0.00236	0.00258	0.00263	0.00266	0.00278	0.00298	0.0031	0.00328	0.00352	0.00346	0.00354	0.00355	0.00358	0.00381	0.00435	0.0046	0.0051	0.00527	0.00551	0.00546	0.00544	0.00619	0.00635	0.00641	0.00626	0.00704	0.00682	0.00716	0.00694
Malawi	0.00403	0.00396	0.00423	0.00466	0.00484	0.00491	0.00529	0.00581	0.00581	0.0059	0.00725	0.00775	0.00794	0.00795	0.00837	0.00858	0.00875	0.00884	0.01015	0.01146	0.01245	0.01203	0.01265	0.01336	0.0139	0.01422	0.01469	0.01505	0.01633	0.01758	0.01819
Mali	0.00086	0.00086	0.0011	0.00128	0.00139	0.00139	0.00165	0.00167	0.00171	0.00175	0.00188	0.0019	0.00215	0.00225	0.00227	0.0023	0.00217	0.00232	0.00235	0.00235	0.00238	0.00242	0.0024	0.0024	0.00249	0.00255	0.00261	0.00265	0.00274	0.00275	0.00293
Mauritania	0.00026	0.00031	0.0004	0.00041	0.00038	0.00032	0.00019	0.00026	0.00026	0.00026	0.00026	0.00026	0.00027	0.00027	0.00029	0.00029	0.00029	0.00031	0.00029	0.00031	0.00033	0.00035	0.00035	0.00042	0.00044	0.00049	0.06594	0.03257	0.02809	0.02511	0.01872
Mauritius	0.00085	0.00062	0.00097	0.00037	0.00068	0.00119	0.00114	0.00145	0.00102	0.00153	0.00087	0.00077	0.00116	0.00106	0.00077	0.00138	0.00105	0.00094	0.00106	0.00317	0.00515	0.00537	0.00524	0.0056	0.00573	0.00543	0.00492	0.00517	0.00559	0.00568	0.00608
Morocco	0.0427	0.03956	0.03564	0.03537	0.03578	0.0358	0.03639	0.03267	0.03379	0.03152	0.03252	0.03323	0.03035	0.02611	0.03167	0.02918	0.03819	0.03555	0.02892	0.01795	0.01214	0.01384	0.01293	0.0191	0.02078	0.01493	0.01498	0.0141	0.01528	0.0319	0.0432
Mozambique	0.14486	0.04353	0.03634	0.05427	0.00684	0.0025	0.00147	0.00141	0.00172	0.00165	0.004	0.00447	0.00441	0.00459	0.00481	0.00492	0.00514	0.01032	0.01783	0.08042	0.10009	0.12405	0.13095	0.11408	0.11914	0.13858	0.20497	0.25287	0.25429	0.26126	0.27412
Namibia	NA	NA	NA	NA	NA	NA	NA	NA	NA	NA	0	0	0	0	0	0.01155	0.00874	0.00617	0.01001	0.01183	0.01393	0.01401	0.01471	0.01533	0.01589	0.01641	0.01577	0.01542	0.01454	0.01362	0.01205
Niger	0.00056	0.00083	0.00125	0.00361	0.00417	0.00419	0.00344	0.00456	0.00431	0.00475	0.00478	0.00478	0.00472	0.00478	0.00478	0.00481	0.00465	0.00446	0.00446	0.00448	0.00405	0.00418	0.00469	0.00484	0.00606	0.00466	0.00452	0.00439	0.00469	0.00577	0.00577
Nigeria	4.49512	3.18214	2.85824	2.76943	3.1177	3.3565	3.31135	3.05266	3.30309	3.9016	4.06938	4.30004	4.42704	4.4509	4.36981	4.52545	4.56371	4.84978	4.89851	4.89075	5.17804	5.45362	5.15444	5.70931	5.89869	6.52299	6.32475	6.27464	5.89862	5.71368	6.37551
Reunion	0.00314	0.00387	0.00441	0.0045	0.00422	0.00505	0.00519	0.00546	0.00432	0.00513	0.00566	0.00476	0.00507	0.00508	0.00509	0.00513	0.0062	0.00653	0.00766	0.0077	0.00769	0.00781	0.00782	0.00791	0.00781	0.00784	0.00779	0.00856	0.00959	0.00942	0.00937
Rwanda	0.00115	0.00108	0.00139	0.00159	0.00168	0.00169	0.00156	0.00171	0.00172	0.00178	0.00172	0.0017	0.00176	0.00158	0.00161	0.00163	0.00145	0.00163	0.00163	0.0013	0.00112	0.00091	0.00099	0.00119	0.00083	0.00065	0.00038	0.00042	0.00067	0.00096	0.00108
Saint Helena	0	0	0	0	0	0	0	0	0	0	0	0	0	0	0	0	0	0	0	0	0	0	0	0	0	0	0	0	0	0	0
Sao Tome and Principe	0.00007	0.00007	0.00008	0.00006	0.00008	0.00008	0.00007	0.00008	0.00008	0.00008	0.00008	0.00008	0.00008	0.00008	0.00008	0.00008	0.00008	0.00008	0.00007	0.00009	0.0001	0.00004	0.00006	0.00007	0.00006	0.00004	0.00008	0.0001	0.00012	0.00012	0.0001
Senegal	0	0	0	0	0	0	0	0	0	0	0.00046	0.00046	0.00046	0.0011	0.00173	0.00207	0.00239	0.00176	0.00177	0.00178	0.00213	0.00223	0.00425	0.00558	0.00494	0.00478	0.00442	0.00375	0.00414	0.00442	0.00358
Seychelles	0	0	0	0	0	0	0	0	0	0	0	0	0	0	0	0	0	0	0	0	0	0	0	0	0	0	0	0	0	0	0
Sierra Leone	0	0	0	0	0	0	0	0	0	0	0	0	0	0	0	0	0	0	0	0	0.00015	0.00015	0.00016	0.00016	0.00016	0.00018	0.00004	0.00018	0.0002	0.00049	0.00098
Somalia	0	0	0	0	0	0	0	0	0	0	0	0	0	0	0	0	0	0	0	0	0	0	0	0.0001	0	0	0	0	0	0	0
South Africa	2.71516	3.06821	3.17324	3.28133	3.71563	3.97925	4.09735	4.06884	4.23474	4.1214	4.04577	4.11971	4.21439	4.3043	4.59804	4.84064	4.85562	5.43784	5.52473	5.43444	5.57823	5.61823	5.52086	5.91416	6.06469	6.05236	6.03843	6.04461	6.13933	6.06113	6.1797
Sudan and South Sudan	0.00514	0.00772	0.00799	0.00804	0.00783	0.00955	0.00955	0.00954	0.00948	0.00966	0.01517	0.01605	0.01698	0.01695	0.01691	0.01555	0.01999	0.02514	0.03429	0.14551	0.36325	0.40631	0.46122	0.51756	0.65343	0.66706	0.72015	0.87984	0.90836	0.93329	0.99094
Swaziland	0.00585	0.00558	0.00521	0.00332	0.00457	0.00622	0.00601	0.00616	0.00626	0.00652	0.00571	0.00528	0.00468	0.00337	0.00678	0.00656	0.00563	0.01089	0.01086	0.0134	0.01091	0.01349	0.01511	0.01177	0.01238	0.01312	0.01289	0.01352	0.01373	0.01431	0.01464
Tanzania	0.01028	0.01071	0.0108	0.0113	0.0115	0.01175	0.01127	0.01219	0.01281	0.01501	0.01606	0.01794	0.01701	0.01851	0.01648	0.01694	0.01936	0.01537	0.02213	0.02384	0.02366	0.02862	0.02942	0.02726	0.02944	0.03421	0.03431	0.04587	0.04843	0.05162	0.05565
Togo	0.00039	0.0004	0.0006	0.0002	0.0004	0.00079	0.00079	0.00079	0.00078	0.00099	0.00099	0.00201	0.00132	0.00237	0.00153	0.00263	0.00196	0.00095	0.00175	0.00208	0.00101	0.00052	0.00087	0.00126	0.00082	0.00075	0.00092	0.00099	0.00091	0.00093	0.00096
Tunisia	0.24451	0.26206	0.27131	0.26812	0.27474	0.25465	0.24907	0.24208	0.23764	0.24149	0.21584	0.23432	0.25259	0.2251	0.21118	0.2004	0.2158	0.24518	0.2474	0.25329	0.24552	0.24304	0.25185	0.25646	0.27034	0.26405	0.26645	0.24373	0.2371	0.26533	0.25834
Uganda	0.00658	0.00536	0.0058	0.0054	0.00639	0.00656	0.00669	0.00638	0.006	0.00707	0.00792	0.00801	0.01006	0.00988	0.01029	0.01067	0.01145	0.01266	0.0128	0.01286	0.01582	0.01597	0.01697	0.01794	0.01892	0.01839	0.01231	0.01461	0.01686	0.0145	0.01546
Western Sahara	0	0	0	0	0	0	0	0	0	0	0	0	0	0	0	0	0	0	0	0	0	0	0	0	0	0	0	0	0	0	0
Zambia	0.10831	0.11426	0.11926	0.11617	0.11541	0.1161	0.11552	0.09898	0.09911	0.08051	0.09015	0.08943	0.09053	0.08831	0.08365	0.08391	0.07719	0.08416	0.08088	0.08272	0.08304	0.08573	0.08683	0.08919	0.08686	0.09162	0.09824	0.09625	0.09432	0.10035	0.1089
Zimbabwe	0.1255	0.11969	0.11179	0.12834	0.11936	0.11579	0.14148	0.15611	0.1637	0.15864	0.17237	0.18788	0.17902	0.16037	0.14874	0.1436	0.14079	0.12906	0.13079	0.15414	0.14736	0.14202	0.14495	0.1497	0.14652	0.15503	0.13467	0.13462	0.10701	0.11265	0.12207
Afghanistan	0.07309	0.09328	0.09593	0.10015	0.10049	0.12165	0.12127	0.11579	0.12196	0.12031	0.1193	0.02092	0.01704	0.01709	0.01717	0.01302	0.01374	0.01342	0.01329	0.01351	0.01376	0.00766	0.00803	0.00809	0.00727	0.00748	0.00795	0.0151	0.01676	0.02198	0.02678
American Samoa	0	0	0	0	0	0	0	0	0	0	0	0	0	0	0	0	0	0	0	0	0	0	0	0	0	0	0	0	0	0	0
Australia	3.24549	3.71959	3.73669	4.13781	4.54319	4.99634	5.20336	5.71826	5.275	5.57147	6.15646	6.43652	6.62589	6.65152	6.91856	7.42946	7.58233	8.31145	8.6614	8.84458	9.65711	10.24805	10.45625	10.3256	10.51958	11.21398	11.58874	11.89493	11.86428	12.38437	12.91574
Bangladesh	0.05354	0.06163	0.06809	0.07198	0.09963	0.10319	0.11246	0.13037	0.14972	0.16539	0.16351	0.17329	0.20443	0.22201	0.24416	0.26365	0.27221	0.27474	0.2957	0.32458	0.35052	0.37372	0.40765	0.45666	0.49525	0.5347	0.59122	0.62385	0.69297	0.75483	0.76325
Bhutan	0.00006	0.00007	0.00009	0.00009	0.00009	0.00009	0.00315	0.0122	0.01582	0.01599	0.01607	0.01629	0.01767	0.01747	0.01841	0.01957	0.02087	0.01997	0.01946	0.0195	0.01956	0.02202	0.02443	0.02732	0.0241	0.02838	0.04689	0.06688	0.07107	0.06886	0.07182
Brunei	0.94578	0.8059	0.76411	0.78974	0.73602	0.71032	0.73572	0.68908	0.68177	0.67202	0.7236	0.68119	0.70466	0.71122	0.72212	0.75137	0.72705	0.7413	0.70295	0.7752	0.81625	0.83679	0.79287	0.82807	0.85055	0.88785	0.99211	0.88344	0.8424	0.75403	0.78395
Burma (Myanmar)	0.08633	0.08161	0.09327	0.09711	0.10659	0.10714	0.10508	0.09135	0.07892	0.08776	0.08339	0.08559	0.08568	0.08998	0.10111	0.10022	0.09542	0.09425	0.10055	0.08939	0.16654	0.27682	0.38026	0.43438	0.45857	0.57129	0.56937	0.60379	0.56444	0.53502	0.5597
Cambodia	0.00051	0.00055	0.00057	0.00042	0.00031	0.00037	0.00042	0.00047	0.00052	0.00056	0.00064	0.00067	0.00069	0.00071	0.00073	0.00075	0.0008	0.00058	0.00051	0.00045	0.00048	0.00032	0.00031	0.0005	0.00042	0.00059	0.00064	0.00064	0.00061	0.00057	0.00048
China	18.12198	17.9451	18.92106	20.2361	22.12683	23.3052	24.04332	24.94118	26.14834	27.77795	28.38778	28.82386	29.52686	30.58422	32.50675	33.53872	35.10367	38.4407	38.88761	37.5003	38.78412	41.67305	46.22965	51.24905	55.92328	63.95241	68.2333	73.28089	78.35991	84.06435	90.39177
Cook Islands	0	0	0	0	0	0	0	0	0	0	0	0	0	0	0	0	0	0	0	0	0	0	0	0	0	0	0	0	0	0	0
Fiji	0	0	0	0.00052	0.00298	0.00304	0.00365	0.00381	0.00358	0.00362	0.00417	0.00418	0.0042	0.00419	0.00439	0.00459	0.00461	0.0046	0.00447	0.00481	0.00443	0.00499	0.00478	0.00373	0.00388	0.00359	0.00358	0.00532	0.00527	0.00488	0.00443
French Polynesia	0	0	0	0.00017	0.00025	0.00033	0.00037	0.00036	0.0006	0.00067	0.00072	0.00077	0.00093	0.00097	0.00099	0.00129	0.00138	0.00136	0.00154	0.00089	0.00118	0.00108	0.00133	0.00158	0.00178	0.00177	0.00196	0.00217	0.00206	0.00203	0.00168
Guam	0	0	0	0	0	0	0	0	0	0	0	0	0	0	0	0	0	0	0	0	0	0	0	0	0	0	0	0	0	0	0
Hawaiian Trade Zone	0	0	0	0	0	0	0	NA	NA	NA	NA	NA	NA	NA	NA	NA	NA	NA	NA	NA	NA	NA	NA	NA	NA	NA	NA	NA	NA	NA	NA
Hong Kong	0	0	0	0	0	0	0	0	0	0	0	0	0	0	0	0	0	0	0	0	0	0	0	0	0	0	0.00001	0.00001	0.00001	0.00001	0.00001
India	3.10139	3.72959	3.97552	4.33795	4.95498	5.26619	5.67757	5.64275	6.16515	6.46779	6.82097	7.16245	7.33294	7.4851	8.00116	9.48442	8.74731	9.16678	9.36894	9.58659	9.83335	10.29344	9.94791	10.50927	11.08758	11.7386	12.39041	13.02888	13.5655	14.56757	15.29438
Indonesia	4.22713	4.3349	3.71025	3.84971	4.29466	4.19652	4.39746	4.39443	4.56944	4.98064	5.30246	5.8978	6.08234	6.31535	6.65181	6.94953	7.43122	7.38603	7.5064	7.96615	7.68644	7.56632	7.76478	8.07966	8.46661	9.05921	10.77281	11.31123	11.43057	12.57762	13.78099
Japan	2.35261	2.3552	2.48792	2.63441	2.75303	3.0949	3.1025	3.34973	3.34297	3.34943	3.52272	3.70024	3.62057	3.98664	3.8644	4.25542	4.34437	4.58148	4.68939	4.4706	4.51402	4.4759	4.17453	3.75124	4.15686	4.22103	4.32446	3.83189	3.79091	3.98551	4.14117
Kiribati	0	0	0	0	0	0	0	0	0	0	0	0	0	0	0	0	0	0	0	0	0	0	0	0	0	0	0	0	0	0	0
Korea, North	1.21016	1.25139	1.31266	1.32527	1.35957	1.42365	1.41666	1.39641	1.72229	1.37727	1.31551	1.27369	1.10018	1.01042	0.96089	0.90919	0.81704	0.75206	0.68433	0.76066	0.80628	0.83046	0.80191	0.83494	0.87693	0.95389	0.9589	0.85468	0.90694	0.8725	0.89422
Korea, South	0.38113	0.40548	0.4109	0.46793	0.5198	0.60003	0.74339	0.86058	0.84809	0.87078	0.86259	0.84462	0.78723	0.76896	0.71593	0.77189	0.81909	0.84291	0.97558	1.10282	1.15655	1.18055	1.22683	1.34134	1.34387	1.49644	1.51217	1.46379	1.53563	1.51575	1.53337
Laos	0.00956	0.01139	0.0119	0.01073	0.00982	0.00898	0.0086	0.00556	0.00505	0.00692	0.00852	0.00917	0.0089	0.00896	0.00882	0.0114	0.01371	0.01446	0.02209	0.03069	0.04018	0.04011	0.04082	0.03619	0.0402	0.04175	0.04323	0.04776	0.0491	0.0471	0.04564
Macau	0	0	0	0	0	0	0	0	0	0	0	0	0	0	0	0	0	0	0	0	0	0	0	0	0	0	0	0	0	0	0
Malaysia	0.66094	0.63012	0.70799	0.93106	1.30802	1.42628	1.65591	1.67885	1.80991	1.92322	2.03265	2.19211	2.26333	2.33823	2.41047	2.59193	2.83647	3.00953	3.14305	3.15873	3.31433	3.34123	3.43291	3.6602	3.77393	3.6043	3.58031	3.66826	3.78166	3.71599	3.69959
Maldives	0	0	0	0	0	0	0	0	0	0	0	0	0	0	0	0	0	0	0	0	0	0	0	0	0	0	0	0	0	0	0
Mongolia	0.05377	0.04801	0.06005	0.06073	0.06117	0.0727	0.07848	0.08746	0.09654	0.09077	0.08052	0.09697	0.08113	0.07063	0.06381	0.07003	0.04594	0.0421	0.04351	0.04302	0.04481	0.04453	0.04838	0.04669	0.04794	0.10065	0.11203	0.1386	0.16307	0.25426	0.52721
Nauru	0	0	0	0	0	0	0	0	0	0	0	0	0	0	0	0	0	0	0	0	0	0	0	0	0	0	0	0	0	0	0
Nepal	0.0019	0.00225	0.00223	0.00338	0.00357	0.00353	0.00456	0.00566	0.00575	0.00559	0.00912	0.00945	0.00861	0.00897	0.00968	0.01198	0.01229	0.01113	0.0117	0.01474	0.01691	0.01917	0.02164	0.02321	0.02406	0.02522	0.02736	0.02758	0.02772	0.03035	0.03135
New Caledonia	0.00287	0.0028	0.00427	0.00292	0.00414	0.005	0.00416	0.00265	0.00544	0.00538	0.00474	0.00355	0.00354	0.00353	0.00388	0.00433	0.00403	0.00368	0.00401	0.00478	0.00454	0.00382	0.00331	0.00333	0.00334	0.00356	0.00312	0.00421	0.00476	0.00422	0.00466
New Zealand	0.33037	0.34695	0.37548	0.4061	0.43893	0.46312	0.5355	0.51985	0.56091	0.5774	0.59022	0.61233	0.59702	0.61376	0.63249	0.63448	0.6557	0.6944	0.64686	0.67495	0.68323	0.68203	0.71078	0.64666	0.64881	0.60664	0.63342	0.66545	0.68881	0.70334	0.75036
Niue	0	0	0	0	0	0	0	0	0	0	0	0	0	0	0	0	0	0	0	0	0	0	0	0	0	0	0	0	0	0	0
Pakistan	0.42704	0.4611	0.513	0.52024	0.54458	0.5919	0.6478	0.68987	0.74189	0.77732	0.81844	0.88798	0.93657	0.94407	1.0149	1.03809	1.05649	1.06969	1.06017	1.09577	1.14589	1.12375	1.14273	1.25274	1.31914	1.48741	1.64768	1.64187	1.6443	1.65906	1.73372
Papua New Guinea	0.00324	0.00321	0.00315	0.00401	0.00424	0.00435	0.00472	0.00451	0.00454	0.00469	0.00473	0.00516	0.11569	0.26526	0.23172	0.21724	0.22658	0.17497	0.17463	0.21107	0.15724	0.15173	0.12631	0.11845	0.10809	0.09795	0.10747	0.10335	0.09524	0.08713	0.07839
Philippines	0.09641	0.07788	0.10444	0.1226	0.15172	0.15421	0.15275	0.13897	0.15442	0.15797	0.15708	0.14789	0.15692	0.16636	0.17134	0.15873	0.16742	0.15895	0.16421	0.20989	0.22722	0.23032	0.29921	0.35521	0.3971	0.39895	0.38278	0.41154	0.43423	0.45662	0.48245
Samoa	0.00007	0.00007	0.00013	0.00013	0.00017	0.00018	0.00021	0.00019	0.00019	0.00021	0.00021	0.00021	0.00026	0.00026	0.00026	0.00027	0.00031	0.00034	0.00039	0.00044	0.00036	0.0005	0.00063	0.00055	0.0005	0.0005	0.00051	0.00052	0.00052	0.00053	0.00054
Singapore	0	0	0	0	0	0	0	0	0	0	0.00177	0.00511	0.00507	0.00505	0.00505	0.00505	0.00507	0.005	0.005	0.00501	0.005	0.00978	0.00962	0.01014	0.0096	0.00918	0.00946	0.00963	0.01033	0.01038	0.01145
Solomon Islands	0	0	0	0	0	0	0	0	0	0	0	0	0	0	0	0	0	0	0	0	0	0	0	0	0	0	0	0	0	0	0
Sri Lanka	0.01521	0.01626	0.01663	0.01267	0.0216	0.02476	0.02734	0.02244	0.02653	0.02893	0.03239	0.0322	0.02969	0.03874	0.04176	0.04544	0.03328	0.03486	0.03952	0.04224	0.0324	0.03193	0.02726	0.03356	0.02952	0.03434	0.03837	0.03881	0.04049	0.03793	0.05462
Taiwan	0.23774	0.29162	0.30515	0.36043	0.4084	0.4564	0.42368	0.47765	0.41419	0.40858	0.49706	0.42748	0.43898	0.41371	0.4316	0.43531	0.4566	0.44326	0.45769	0.46424	0.46456	0.44403	0.46711	0.4613	0.46877	0.47551	0.46479	0.4769	0.47996	0.4829	0.48955
Thailand	0.02982	0.09129	0.1316	0.15172	0.19852	0.32974	0.33594	0.34759	0.42001	0.44775	0.51678	0.57088	0.59183	0.65407	0.72879	0.8079	0.97443	1.1298	1.12288	1.16594	1.27243	1.30818	1.40481	1.56132	1.59496	1.73512	1.81896	1.93058	2.07455	2.16374	2.35386
Timor-Leste (East Timor)	NA	NA	NA	NA	NA	NA	NA	NA	NA	NA	NA	NA	NA	NA	NA	NA	NA	NA	NA	NA	NA	NA	NA	0	0.10126	0.1837	0.1963	0.15269	0.19509	0.18728	0.17022
Tonga	0	0	0	0	0	0	0	0	0	0	0	0	0	0	0	0	0	0	0	0	0	0	0	0	0	0	0	0	0	0	0
U.S. Pacific Islands	0	0	0	0	0	0.00017	0.00031	0.00031	0.00031	0.00031	0.00031	0.00031	0.00031	0.00031	0.00031	0.00031	0.00031	0.00031	0.00031	0.00026	0.00026	0.00026	0.00018	0.00018	0.00018	0.00018	0.00018	0.00018	0.00018	0.00018	0.00018
Vanuatu	0	0	0	0	0	0	0	0	0	0	0	0	0	0	0	0	0	0	0	0	0	0	0	0	0	0	0	0	0	0	0
Vietnam	0.13366	0.1538	0.16282	0.16389	0.13408	0.14774	0.16259	0.17745	0.19376	0.23046	0.27555	0.36356	0.43399	0.49939	0.55341	0.71647	0.77598	0.81236	0.95008	1.03766	1.15634	1.32039	1.38336	1.45572	1.76884	1.96771	2.10943	2.15879	2.13827	2.31247	2.32287
Wake Island	0	0	0	0	0	0	0	0	0	0	0	0	0	0	0	0	0	0	0	0	0	0	0	0	0	0	0	0	0	0	0
