# Supplementary material
Source: MDPI journal article supplement (https://www.mdpi.com/1099-4300/15/12/5565)
Supplement: s2 [file s2 › Sources/data/Total Energy Use.csv]

Region	1980	1981	1982	1983	1984	1985	1986	1987	1988	1989	1990	1991	1992	1993	1994	1995	1996	1997	1998	1999	2000	2001	2002	2003	2004	2005	2006	2007	2008	2009	2010	2011
North America	91.60003	89.82128	86.64257	86.22497	90.60321	90.96346	91.24179	94.12101	98.32298	100.79731	100.14346	100.54434	102.33431	104.28844	106.48095	108.52211	112.07239	112.91289	113.32481	115.69359	118.46755	115.34801	117.04469	117.93194	120.71982	121.20333	120.76222	122.86815	120.10351	114.62372	118.34544	NA
Bermuda	0.00793	0.00686	0.00727	0.00771	0.00752	0.00741	0.007	0.00988	0.0108	0.01315	0.00928	0.00805	0.00647	0.00695	0.00743	0.00739	0.0075	0.00752	0.00752	0.00752	0.0075	0.00744	0.00752	0.00814	0.00869	0.00927	0.00922	0.01018	0.00981	0.00971	0.00955	NA
Canada	9.79686	9.58952	9.20637	9.18989	9.78461	10.15233	10.25423	10.5858	11.05397	11.20107	10.98094	11.11813	11.46111	11.70439	12.0236	12.21439	12.55314	12.64884	12.34528	12.96829	13.30484	12.87242	13.09648	13.52567	14.11424	14.17242	13.8183	14.02585	13.54625	13.09711	13.00072	13.49477
Greenland	0.00791	0.00746	0.00722	0.00505	0.00799	0.00714	0.00462	0.00335	0.00777	0.00671	0.00787	0.00779	0.00687	0.00708	0.00719	0.00719	0.00728	0.00746	0.00756	0.00756	0.00772	0.00796	0.00805	0.00809	0.00813	0.00829	0.00846	0.00826	0.00917	0.00893	0.00893	NA
Mexico	3.71845	4.10949	4.32049	4.04957	4.16918	4.40226	4.32653	4.46445	4.53802	4.78677	4.65663	4.96898	5.07372	5.14468	5.34952	5.26286	5.48104	5.64601	5.94557	6.05728	6.33194	6.29111	6.28657	6.41137	6.42585	6.73068	7.29561	7.5267	7.26255	6.94764	7.28397	7.8079
Saint Pierre and Miquelon	0.0022	0.00221	0.00203	0.00221	0.00216	0.00191	0.0024	0.00306	0.00319	0.00365	0.00359	0.00341	0.00318	0.00174	0.00183	0.00122	0.00121	0.00083	0.00096	0.00096	0.00105	0.00096	0.00096	0.00105	0.00113	0.00117	0.00118	0.00122	0.00123	0.00122	0.00122	NA
United States	78.06668	76.10575	73.09919	72.97055	76.63174	76.3924	76.64702	79.05446	82.70921	84.78595	84.48516	84.43798	85.78297	87.42359	89.09138	91.02906	94.02221	94.60223	95.01791	96.65197	98.8145	96.16811	97.6451	97.97761	100.16178	100.28151	99.62944	101.29594	99.27451	94.55912	98.04105	97.26245
Central & South America	11.53539	11.48711	11.47884	11.34359	12.08147	12.31643	13.07322	13.36335	13.70194	14.16146	14.49671	15.10208	15.30328	13.88973	16.8368	17.58997	18.50591	19.43301	20.1041	20.26858	20.79795	21.10569	21.09502	21.54205	22.48281	23.22909	24.34095	24.66038	25.7009	25.28353	26.86867	NA
Antarctica	0.00213	0.00213	0.00212	0.00213	0.0027	0.00304	0.00275	0.00283	0.00291	0.00288	0.00292	0.00305	0.00304	0.00304	0.00305	0.00314	0.00313	0.00314	0.00314	0.00314	0.00313	0.00318	0.00318	0.00327	0.00325	0.0035	0.0035	0.00337	0.00376	0.00339	0.00105	NA
Antigua and Barbuda	0.00598	0.00531	0.00711	0.00415	0.0047	0.00461	0.00462	0.00564	0.0058	0.00582	0.00608	0.006	0.00598	0.00588	0.00661	0.00679	0.00677	0.00705	0.00705	0.00705	0.00725	0.00727	0.00732	0.00776	0.00836	0.00909	0.00927	0.00891	0.00973	0.00943	0.00941	NA
Argentina	1.64051	1.59727	1.67291	1.69301	1.83715	1.74184	1.89741	1.95164	1.95674	1.93995	1.87408	1.97165	2.04721	1.97028	2.243	2.31176	2.39434	2.46399	2.5753	2.60422	2.66876	2.61239	2.48186	2.66675	2.7809	2.95491	3.13524	3.27338	3.35163	3.30164	3.34874	NA
Aruba	NA	NA	NA	NA	NA	NA	0.00146	0.00146	0.00556	0.00747	0.00787	0.00858	0.00921	0.0089	0.0104	0.01201	0.0079	0.01264	0.01277	0.01277	0.01349	0.01353	0.01353	0.01442	0.01452	0.01487	0.01597	0.01461	0.01407	0.01449	0.01517	NA
Bahamas, The	0.0599	0.06326	0.0541	0.04065	0.03669	0.03321	0.03275	0.03622	0.0338	0.03847	0.04116	0.0365	0.03061	0.02965	0.03625	0.04254	0.04778	0.04751	0.0536	0.04834	0.04749	0.0466	0.0469	0.0566	0.0572	0.0658	0.06591	0.06274	0.07109	0.04867	0.04867	NA
Barbados	0.01446	0.0153	0.01527	0.01613	0.01555	0.01715	0.01826	0.01731	0.01645	0.01773	0.0184	0.01857	0.01877	0.01777	0.018	0.01844	0.0164	0.02033	0.02098	0.0215	0.02378	0.02293	0.02293	0.02335	0.01599	0.0216	0.0206	0.01865	0.01746	0.02054	0.0193	NA
Belize	0.00371	0.00344	0.00325	0.00325	0.00351	0.00352	0.00421	0.00348	0.00262	0.00362	0.00495	0.00548	0.00474	0.00442	0.00449	0.00552	0.00495	0.0075	0.00747	0.00767	0.01074	0.01431	0.01376	0.01409	0.01513	0.01598	0.01709	0.01752	0.01782	0.01193	0.0125	NA
Bolivia	0.07454	0.0834	0.07371	0.07562	0.07319	0.06694	0.06835	0.06706	0.07765	0.08738	0.09259	0.09112	0.09799	0.08437	0.10828	0.12332	0.12122	0.13546	0.12563	0.14117	0.16192	0.14481	0.157	0.19835	0.20213	0.20023	0.22594	0.23317	0.24958	0.22976	0.23258	NA
Brazil	4.02179	3.88321	3.94323	3.94192	4.30882	4.59267	4.9686	5.11182	5.28481	5.44799	5.75431	5.99591	6.07731	5.0104	6.62072	7.02034	7.45336	7.85629	8.11133	8.25842	8.53326	8.44866	8.55386	8.66412	8.99638	9.35596	9.69969	10.12882	10.33828	10.42654	11.29911	11.6573
Cayman Islands	0.00144	0.00155	0.00155	0.00151	0.00155	0.00159	0.0016	0.00163	0.00382	0.00388	0.00396	0.00422	0.0043	0.00386	0.00445	0.00483	0.00486	0.00487	0.00496	0.00496	0.0049	0.00496	0.00496	0.00514	0.00551	0.00578	0.00657	0.00757	0.00925	0.00774	0.00778	NA
Chile	0.42668	0.41949	0.37365	0.37945	0.39224	0.39888	0.38895	0.41039	0.44866	0.50603	0.57143	0.5706	0.61665	0.62062	0.70588	0.78044	0.84226	0.95505	0.93508	0.98803	1.01272	1.04667	1.0647	1.11922	1.19658	1.27932	1.31642	1.0911	1.34684	1.29926	1.33341	1.35782
Colombia	0.69636	0.71547	0.76684	0.77864	0.85268	0.86345	0.90079	0.82399	0.91932	0.95303	0.88984	0.96652	0.97614	1.00023	1.09987	1.09449	1.18949	1.22756	1.23964	1.17921	1.17201	1.16349	1.16015	1.20249	1.21593	1.26835	1.31278	1.33293	1.34274	1.33538	1.36665	NA
Costa Rica	0.05545	0.0572	0.0558	0.06133	0.05911	0.05935	0.05825	0.06449	0.06984	0.07579	0.0744	0.07934	0.093	0.0976	0.10293	0.1059	0.10708	0.11854	0.12158	0.13348	0.14104	0.14556	0.15333	0.15957	0.16397	0.16188	0.17481	0.18426	0.19038	0.18469	0.18718	NA
Cuba	0.45633	0.46398	0.50137	0.45973	0.47576	0.48409	0.50085	0.49279	0.50004	0.51029	0.50176	0.46286	0.40903	0.37085	0.41167	0.41897	0.42871	0.47225	0.44953	0.4568	0.45968	0.46595	0.46699	0.46354	0.51958	0.45093	0.35559	0.37219	0.35797	0.41463	0.39997	NA
Dominica	0.00048	0.00061	0.0006	0.00067	0.00068	0.00073	0.00072	0.00077	0.00096	0.00101	0.00101	0.00101	0.00101	0.001	0.0012	0.00135	0.00135	0.00136	0.00147	0.00153	0.00148	0.00175	0.00191	0.00203	0.00188	0.0016	0.00195	0.00193	0.00204	0.00204	0.00214	NA
Dominican Republic	0.08726	0.08641	0.09122	0.10872	0.09397	0.10676	0.10905	0.12611	0.13375	0.12745	0.13872	0.14124	0.14654	0.12852	0.14665	0.15912	0.1726	0.18204	0.18805	0.21787	0.23415	0.24458	0.25249	0.28608	0.27171	0.27188	0.28134	0.29372	0.29398	0.28108	0.28926	NA
Ecuador	0.18651	0.19313	0.21098	0.19725	0.2079	0.2206	0.23703	0.2338	0.2423	0.2372	0.25381	0.26809	0.29819	0.25434	0.31462	0.30813	0.3324	0.34286	0.35013	0.33588	0.34462	0.3609	0.36515	0.37612	0.3921	0.40707	0.44521	0.47334	0.57449	0.53288	0.56297	NA
El Salvador	0.04527	0.04153	0.04156	0.0424	0.04507	0.04512	0.04824	0.04681	0.05113	0.05198	0.05371	0.05309	0.06031	0.05704	0.06857	0.08432	0.08619	0.08659	0.09891	0.10382	0.10082	0.10523	0.10397	0.1135	0.11117	0.11716	0.12156	0.12288	0.12097	0.11837	0.12442	NA
Falkland Islands (Islas Malvinas)	0.00017	0.00017	0.00017	0.00017	0.00017	0.00022	0.00022	0.00022	0.00043	0.00039	0.00035	0.00035	0.00035	0.00035	0.00035	0.00039	0.00044	0.00048	0.00039	0.00039	0.00039	0.0004	0.00044	0.00044	0.00048	0.00053	0.00057	0.00065	0.00068	0.00067	0.00067	NA
French Guiana	0.00515	0.00443	0.00565	0.00581	0.00463	0.00465	0.00542	0.00598	0.00706	0.00796	0.00951	0.01075	0.00861	0.01128	0.01169	0.01332	0.01329	0.01332	0.01355	0.01355	0.01369	0.01921	0.01969	0.02057	0.02019	0.021	0.02132	0.02097	0.0203	0.01847	0.02087	NA
Grenada	0.00067	0.00077	0.00085	0.00083	0.00085	0.00088	0.00098	0.00102	0.00111	0.00115	0.00178	0.00178	0.00183	0.00181	0.00237	0.00221	0.00244	0.00308	0.00278	0.00278	0.00181	0.00318	0.00345	0.00349	0.00352	0.00361	0.00381	0.00377	0.0039	0.00398	0.00397	NA
Guadeloupe	0.00707	0.0101	0.01275	0.01339	0.01483	0.01341	0.01378	0.01567	0.01712	0.01916	0.02063	0.0216	0.02005	0.02142	0.02398	0.0246	0.02436	0.02481	0.02486	0.02486	0.02632	0.02679	0.02733	0.02931	0.02985	0.03126	0.03275	0.03631	0.03707	0.03188	0.03188	NA
Guatemala	0.06717	0.05719	0.05804	0.063	0.05405	0.06058	0.06525	0.06536	0.07126	0.07487	0.08019	0.07816	0.08511	0.08435	0.10313	0.10917	0.11322	0.12286	0.14229	0.15264	0.15753	0.16974	0.1687	0.17628	0.19425	0.20438	0.20222	0.20965	0.19736	0.21336	0.21337	NA
Guyana	0.02142	0.02434	0.01956	0.01726	0.01973	0.02005	0.01933	0.0147	0.01461	0.00977	0.00942	0.01085	0.01239	0.01523	0.01556	0.0133	0.01421	0.01557	0.0197	0.02096	0.0229	0.02354	0.02393	0.02341	0.02101	0.02313	0.022	0.02186	0.02235	0.02256	0.02244	NA
Haiti	0.015	0.01088	0.0143	0.01285	0.01307	0.01495	0.01467	0.0213	0.02316	0.02134	0.01413	0.01418	0.01531	0.01099	0.01	0.01564	0.01822	0.02185	0.02161	0.02341	0.02408	0.02601	0.02652	0.02639	0.02686	0.02719	0.02785	0.02907	0.03579	0.03339	0.03097	NA
Honduras	0.03317	0.03085	0.0315	0.0329	0.03382	0.03222	0.03763	0.03635	0.04547	0.05259	0.0593	0.05895	0.06051	0.05982	0.0609	0.06496	0.07339	0.07457	0.08028	0.08749	0.08601	0.09293	0.09775	0.10039	0.10937	0.11675	0.12283	0.13443	0.13243	0.12509	0.13198	NA
Jamaica	0.11805	0.09955	0.08658	0.09239	0.07545	0.06769	0.06822	0.07341	0.08471	0.09729	0.10347	0.10548	0.11568	0.1129	0.12196	0.13443	0.1378	0.14507	0.14803	0.15221	0.14637	0.14699	0.15054	0.15637	0.15835	0.15258	0.17143	0.18033	0.17854	0.12778	0.12696	NA
Martinique	0.00934	0.00919	0.00917	0.00906	0.00813	0.00979	0.01053	0.01194	0.01429	0.02028	0.02189	0.01806	0.02012	0.02504	0.02706	0.02766	0.02769	0.02772	0.02777	0.02777	0.02815	0.02841	0.02879	0.03002	0.03085	0.03266	0.03259	0.03382	0.03016	0.03605	0.0361	NA
Montserrat	0.00026	0.00028	0.00028	0.00028	0.00028	0.00031	0.00031	0.00035	0.0004	0.0004	0.00053	0.00049	0.00057	0.00057	0.00057	0.00066	0.00062	0.00066	0.00071	0.00071	0.00075	0.00075	0.00075	0.00084	0.00092	0.00097	0.00106	0.00115	0.00117	0.00115	0.00115	NA
Netherlands Antilles	0.23781	0.22241	0.21486	0.19761	0.18614	0.15532	0.1517	0.15405	0.14343	0.15139	0.14774	0.14015	0.13817	0.11235	0.14504	0.15289	0.1525	0.16189	0.16162	0.15601	0.15593	0.15784	0.15109	0.14478	0.14548	0.15318	0.16036	0.16864	0.19364	0.17341	0.16436	NA
Nicaragua	0.03277	0.03356	0.03337	0.03173	0.03214	0.03573	0.03478	0.03609	0.03669	0.03994	0.03701	0.03531	0.03978	0.03772	0.04204	0.04486	0.04705	0.04856	0.05237	0.05658	0.05537	0.0591	0.06114	0.06242	0.06628	0.07106	0.07053	0.07157	0.07145	0.07015	0.07232	NA
Panama	0.18343	0.18621	0.17593	0.17807	0.18243	0.16576	0.17099	0.17813	0.1752	0.17082	0.18065	0.17912	0.18153	0.17581	0.20398	0.21583	0.19331	0.19884	0.20818	0.2049	0.20637	0.20344	0.20284	0.19682	0.2272	0.22021	0.2299	0.23553	0.23881	0.25028	0.27683	NA
Paraguay	0.0279	0.02715	0.02639	0.02846	0.03129	0.05515	0.11264	0.1677	0.17444	0.21662	0.23076	0.2449	0.23047	0.25682	0.30165	0.34792	0.36317	0.40086	0.40787	0.42376	0.42971	0.37938	0.39444	0.4241	0.41508	0.40976	0.42508	0.4253	0.4405	0.43597	0.43752	NA
Peru	0.40399	0.43033	0.42903	0.40122	0.41196	0.41853	0.4496	0.45514	0.45353	0.40696	0.38495	0.38181	0.37605	0.39742	0.45232	0.47403	0.50359	0.48611	0.50307	0.51302	0.52873	0.53776	0.54613	0.55734	0.58274	0.61903	0.67681	0.68496	0.76281	0.74815	0.84796	NA
Puerto Rico	0.42761	0.45014	0.33107	0.3207	0.35934	0.31086	0.33724	0.35071	0.3202	0.3123	0.30014	0.37303	0.33257	0.30891	0.35589	0.36377	0.37427	0.38432	0.39356	0.32745	0.44069	0.47836	0.48162	0.51986	0.53042	0.51355	0.51434	0.42645	0.44085	0.39426	0.43966	NA
Saint Kitts and Nevis	0.00075	0.00079	0.00091	0.00074	0.00075	0.00075	0.00075	0.00079	0.00092	0.00092	0.00092	0.00106	0.00105	0.00118	0.00141	0.00128	0.00145	0.00145	0.00145	0.00145	0.00145	0.00145	0.00145	0.00163	0.00179	0.00189	0.00249	0.00354	0.00355	0.00372	0.00372	NA
Saint Lucia	0.00164	0.0013	0.00155	0.00143	0.00143	0.00176	0.00177	0.00198	0.00242	0.00243	0.00243	0.00243	0.00251	0.00229	0.00278	0.00283	0.00282	0.00296	0.00296	0.00296	0.00471	0.00494	0.00504	0.00552	0.00533	0.00532	0.00548	0.00577	0.00603	0.00587	0.00587	NA
Saint Vincent/Grenadines	0.00073	0.00069	0.00074	0.00074	0.00074	0.00085	0.00087	0.00095	0.00112	0.00149	0.00141	0.00125	0.0014	0.00125	0.002	0.00209	0.00208	0.00221	0.00261	0.00261	0.00269	0.00268	0.00284	0.00296	0.00318	0.00317	0.0031	0.00314	0.00316	0.00314	0.00317	NA
Suriname	0.04058	0.03563	0.03487	0.0247	0.02339	0.02843	0.02605	0.01907	0.02224	0.03013	0.03454	0.03523	0.03449	0.03413	0.03533	0.03394	0.03357	0.03409	0.03431	0.03452	0.02927	0.03074	0.032	0.03275	0.03364	0.03496	0.03608	0.03571	0.03577	0.03637	0.03585	NA
Trinidad and Tobago	0.17413	0.16712	0.16779	0.18491	0.25078	0.27406	0.20582	0.19155	0.19772	0.21256	0.22627	0.25308	0.24797	0.26419	0.31133	0.32539	0.35887	0.3891	0.3875	0.3986	0.42055	0.47354	0.49998	0.53889	0.59	0.67327	0.82112	0.82411	0.89599	0.85012	0.93624	NA
Turks and Caicos Islands	0	0	0	0	0	0	0	0	0	0	0	0	0	0	0	0.00019	0.00019	0.00019	0.00021	0.00021	0.00039	0.00023	0.00018	0.00018	0.00017	0.00018	0.00017	0.001	0.00222	0.00226	0.00226	NA
Uruguay	0.10936	0.10367	0.0985	0.12028	0.11708	0.10847	0.11381	0.12167	0.11877	0.10472	0.13414	0.11965	0.13687	0.13013	0.13842	0.12476	0.12886	0.14186	0.17754	0.15973	0.16448	0.16221	0.16845	0.16337	0.14096	0.15679	0.14879	0.1778	0.18452	0.18958	0.21154	NA
Venezuela	1.5883	1.72323	1.7466	1.6837	1.71362	1.74239	1.88679	1.92305	1.93668	2.06224	2.08687	2.21113	2.2178	2.06923	2.43677	2.46985	2.57638	2.66169	2.85389	2.647	2.76891	3.03054	2.93435	2.72196	2.93675	2.91656	3.15857	3.06615	3.22512	3.03864	3.32096	NA
Virgin Islands, U.S.	0.24982	0.22395	0.16259	0.1143	0.13365	0.1496	0.09966	0.11733	0.08209	0.12507	0.11595	0.11875	0.12131	0.08506	0.12289	0.12184	0.12054	0.12303	0.12754	0.30632	0.13864	0.19195	0.19075	0.22458	0.23458	0.22889	0.23891	0.21603	0.22305	0.2232	0.22814	NA
Virgin Islands, British	0.00032	0.00051	0.00051	0.00051	0.00047	0.00048	0.00053	0.00062	0.00066	0.0007	0.0007	0.0007	0.00075	0.00075	0.00075	0.00075	0.00084	0.00084	0.00084	0.00084	0.00084	0.00084	0.00084	0.00097	0.00123	0.00132	0.00141	0.00153	0.0016	0.00157	0.00157	NA
Europe	71.74653	69.5103	68.77485	69.12386	70.81606	72.94136	74.54776	76.01821	76.4533	77.01517	76.31812	75.91577	74.80426	74.95099	74.84892	76.70031	79.42477	79.47567	80.10749	80.13441	81.52783	82.65567	82.51751	84.08542	85.94542	85.76249	86.31168	86.69852	85.64615	81.21917	83.82449	NA
Albania	0.15475	0.15461	0.15416	0.15878	0.16072	0.16086	0.15769	0.1573	0.16167	0.1503	0.10797	0.09283	0.08337	0.05894	0.0692	0.07627	0.08487	0.07729	0.08352	0.09466	0.09619	0.0916	0.09516	0.11449	0.11651	0.12092	0.11852	0.10319	0.10963	0.11511	0.12509	NA
Austria	1.09577	1.08623	1.03457	1.04021	1.06518	1.08788	1.08336	1.03252	1.11489	1.13012	1.16472	1.22261	1.2003	1.24066	1.23269	1.28864	1.33825	1.35389	1.37968	1.38403	1.38594	1.43983	1.45087	1.4705	1.50963	1.55066	1.53621	1.5442	1.53367	1.47479	1.52707	1.46997
Belgium	2.06423	2.05095	1.93514	1.84186	1.90722	2.00146	2.0658	2.10008	2.09054	2.15121	2.18895	2.27438	2.23941	2.24185	2.37609	2.43884	2.58689	2.64582	2.69823	2.65509	2.7338	2.70258	2.6794	2.78228	2.80785	2.77869	2.7376	2.73626	2.91486	2.65429	2.74807	2.69109
Bosnia and Herzegovina	NA	NA	NA	NA	NA	NA	NA	NA	NA	NA	NA	NA	0.2585	0.19454	0.10419	0.17611	0.11437	0.15959	0.18607	0.19127	0.22358	0.22112	0.2316	0.22736	0.25338	0.27251	0.27846	0.25997	0.29093	0.30239	0.32508	NA
Bulgaria	1.32139	1.31357	1.35888	1.37968	1.39121	1.42884	1.41493	1.40928	1.40933	1.31732	1.18045	0.91293	0.90167	0.80713	0.84447	0.92138	0.94847	0.91626	0.84782	0.77174	0.86773	0.90406	0.8746	0.88654	0.87492	0.91869	0.94058	0.84127	0.81712	0.72108	0.76948	NA
Croatia	NA	NA	NA	NA	NA	NA	NA	NA	NA	NA	NA	NA	0.31231	0.30039	0.33778	0.34423	0.34821	0.35472	0.37228	0.37461	0.3756	0.38411	0.37378	0.39311	0.40806	0.404	0.41504	0.3948	0.40653	0.38864	0.39557	NA
Cyprus	0.04202	0.03622	0.03868	0.04296	0.04405	0.04677	0.04851	0.05427	0.05423	0.06548	0.06967	0.07014	0.08134	0.07297	0.09299	0.09256	0.09056	0.09221	0.09985	0.10526	0.10312	0.1125	0.11064	0.11157	0.11762	0.11984	0.12625	0.12657	0.13154	0.12457	0.12146	NA
Czech Republic	NA	NA	NA	NA	NA	NA	NA	NA	NA	NA	NA	NA	NA	1.60239	1.5408	1.565	1.65351	1.4628	1.42265	1.33374	1.40621	1.45203	1.45139	1.51756	1.51531	1.55617	1.58825	1.64613	1.61534	1.53063	1.59118	1.57418
Denmark	0.86306	0.74856	0.73866	0.69914	0.71871	0.814	0.81503	0.83236	0.80544	0.75262	0.76934	0.84526	0.79464	0.84161	0.8776	0.88374	0.97945	0.94273	0.9219	0.89472	0.87642	0.88917	0.8576	0.89932	0.86591	0.84618	0.90184	0.88542	0.84197	0.79435	0.83053	0.78282
Faroe Islands	0.00663	0.00051	0.00051	0.00052	0.00051	0.00051	0.00764	0.00801	0.00848	0.0093	0.00995	0.0092	0.00927	0.00892	0.00933	0.00977	0.00994	0.01003	0.01009	0.01002	0.01022	0.01022	0.01049	0.0105	0.01068	0.01086	0.01172	0.0113	0.01139	0.01133	0.0109	NA
Finland	0.97218	0.98988	0.90641	0.90382	0.94532	0.95667	0.98873	1.06452	1.06046	1.0708	1.11584	1.13321	1.13548	1.14658	1.1855	1.13069	1.1434	1.1787	1.22525	1.21317	1.21661	1.22831	1.24334	1.31717	1.3526	1.26539	1.32564	1.35083	1.29482	1.20685	1.30311	1.22339
Former Czechoslovakia	2.74465	2.72524	2.71119	2.73763	2.78659	2.84158	2.92215	2.98367	2.89939	2.92971	2.90599	2.56488	2.38451	NA	NA	NA	NA	NA	NA	NA	NA	NA	NA	NA	NA	NA	NA	NA	NA	NA	NA	NA
Former Serbia and Montenegro	NA	NA	NA	NA	NA	NA	NA	NA	NA	NA	NA	NA	0.6656	0.52887	0.55562	0.47592	0.74418	0.75552	0.78056	0.62643	0.6587	0.70203	0.77788	0.78073	0.79528	0.76979	NA	NA	NA	NA	NA	NA
Former Yugoslavia	1.66547	1.74257	1.78375	1.82429	2.12645	2.19666	2.20724	2.22166	2.22773	2.23046	2.13426	1.90296	NA	NA	NA	NA	NA	NA	NA	NA	NA	NA	NA	NA	NA	NA	NA	NA	NA	NA	NA	NA
France	8.38888	8.06714	7.7905	7.91184	8.17075	8.34985	8.48675	8.61137	8.59016	8.87517	9.12628	9.739	9.91544	9.80301	9.78224	10.0532	10.53032	10.36364	10.5916	10.71685	10.95781	11.09223	11.00065	11.12078	11.40251	11.35578	11.3806	11.29532	11.29373	10.73373	11.02554	10.78072
Germany	NA	NA	NA	NA	NA	NA	NA	NA	NA	NA	NA	14.30271	14.0417	14.07585	14.01695	14.38832	14.4	14.34602	14.33425	14.11612	14.41007	14.76009	14.44915	14.70252	14.81923	14.42205	14.68168	14.22641	14.39583	13.52424	13.93671	13.08189
Germany, East	3.59379	3.56468	3.60263	3.5452	3.60512	3.80455	3.8116	3.82739	3.81678	3.71624	3.39701	NA	NA	NA	NA	NA	NA	NA	NA	NA	NA	NA	NA	NA	NA	NA	NA	NA	NA	NA	NA	NA
Germany, West	11.27028	10.76921	10.49559	10.49458	10.80876	11.02438	11.40743	11.40608	11.47327	11.1784	11.45957	NA	NA	NA	NA	NA	NA	NA	NA	NA	NA	NA	NA	NA	NA	NA	NA	NA	NA	NA	NA	NA
Gibraltar	0.00738	0.00827	0.00736	0.00581	0.0054	0.01246	0.01868	0.01898	0.02451	0.02104	0.02185	0.02252	0.03988	0.04068	0.04172	0.04181	0.04186	0.04181	0.04825	0.04203	0.09355	0.05126	0.05216	0.0535	0.05489	0.05644	0.05775	0.05952	0.06104	0.06265	0.06368	NA
Greece	0.75171	0.74718	0.72815	0.74775	0.76766	0.80896	0.83651	0.89817	0.9576	1.00161	1.03846	1.05581	1.02027	1.07296	1.08683	1.12394	1.14511	1.19909	1.27422	1.26643	1.338	1.35539	1.35968	1.43748	1.42721	1.44302	1.4855	1.50936	1.47097	1.40269	1.3418	1.29289
Hungary	1.20988	1.20101	1.19572	1.20769	1.18705	1.23217	1.24261	1.27868	1.24846	1.24638	1.18139	1.13205	1.05496	1.02682	1.02824	1.03449	1.06992	1.0458	1.05257	1.05058	1.02243	1.05724	1.06097	1.08511	1.08542	1.15794	1.14796	1.12415	1.10717	1.03658	1.05124	NA
Iceland	0.05649	0.05619	0.05982	0.06287	0.06693	0.06615	0.06864	0.07091	0.07335	0.07658	0.07833	0.07622	0.07781	0.08151	0.08296	0.08444	0.09067	0.09451	0.10388	0.11282	0.1199	0.12267	0.12659	0.12829	0.12972	0.1306	0.14327	0.16695	0.20929	0.2039	0.20542	NA
Ireland	0.32304	0.31186	0.30854	0.29988	0.30755	0.31388	0.3391	0.33993	0.334	0.34706	0.36766	0.38463	0.39173	0.40324	0.42272	0.43221	0.4589	0.48859	0.53077	0.56486	0.60027	0.62845	0.62447	0.61908	0.64429	0.66413	0.70269	0.70299	0.69324	0.62099	0.62811	0.59332
Italy	6.11717	6.00108	5.85958	5.75121	6.01082	6.02781	6.1078	6.331	6.48621	6.67551	6.72365	6.87508	6.83769	6.82577	6.73242	7.04419	7.0722	7.17685	7.38134	7.50781	7.58182	7.62301	7.65325	7.90469	8.16668	8.07918	8.00936	8.03926	7.83857	7.35131	7.62586	7.40538
Luxembourg	0.14196	0.12669	0.12047	0.11458	0.1236	0.12541	0.125	0.12441	0.12894	0.13885	0.14474	0.15658	0.15566	0.16262	0.1567	0.13923	0.14186	0.14123	0.13841	0.14602	0.15384	0.16143	0.16988	0.17893	0.19745	0.20597	0.20346	0.1993	0.19594	0.18552	0.19874	0.19426
Macedonia	NA	NA	NA	NA	NA	NA	NA	NA	NA	NA	NA	NA	0.11972	0.12041	0.11189	0.11526	0.12501	0.12249	0.13989	0.12905	0.11505	0.10637	0.1066	0.1156	0.11805	0.11917	0.11709	0.11407	0.11367	0.1128	0.12055	NA
Malta	0.01888	0.02056	0.02211	0.01587	0.02247	0.01833	0.021	0.02361	0.02654	0.02898	0.03049	0.03103	0.03098	0.03471	0.03589	0.03366	0.03497	0.03735	0.03905	0.04454	0.03919	0.0329	0.03939	0.03925	0.03973	0.04122	0.03904	0.04138	0.04255	0.08783	0.10438	NA
Montenegro	NA	NA	NA	NA	NA	NA	NA	NA	NA	NA	NA	NA	NA	NA	NA	NA	NA	NA	NA	NA	NA	NA	NA	NA	NA	NA	0.04016	0.03602	0.04311	0.03953	0.04752	NA
Netherlands	3.20502	3.00721	2.87289	2.81453	2.88156	3.00962	3.14291	3.23155	3.24036	3.25926	3.31155	3.49597	3.46819	3.53956	3.50861	3.57411	3.73196	3.69864	3.69078	3.68216	3.79343	3.92944	3.93986	4.02199	4.13271	4.23416	4.14183	4.35459	4.14045	4.07681	4.2662	4.07899
Norway	1.34103	1.38834	1.34656	1.47001	1.53129	1.54751	1.54194	1.57291	1.60034	1.67164	1.71032	1.61945	1.71221	1.71023	1.68012	1.78719	1.68984	1.74909	1.80677	1.88487	1.98845	1.89297	1.94002	1.82	1.92523	2.0028	1.84424	1.97706	1.94232	1.89931	1.86836	1.86774
Poland	5.06796	4.57704	4.58383	4.59384	4.75503	4.91312	5.00005	5.16208	5.0579	4.86104	3.95022	3.87079	3.83475	3.96796	3.81655	3.70105	4.14003	4.08498	3.8487	3.97659	3.62445	3.45492	3.45339	3.57188	3.74765	3.67445	3.85182	3.91829	3.89067	3.78329	4.05529	4.09296
Portugal	0.43149	0.36906	0.48664	0.50029	0.52866	0.53583	0.56926	0.5882	0.65129	0.70028	0.74771	0.74822	0.75685	0.76917	0.80845	0.84072	0.87647	0.91333	0.97411	1.02381	1.07048	1.08598	1.08306	1.11732	1.11244	1.12608	1.1019	1.12765	1.06227	1.0649	1.12574	1.074
Romania	2.75196	2.7643	2.88751	2.94744	2.87816	2.88837	2.96275	3.03482	2.99265	3.10534	2.81496	2.20882	2.05098	1.86929	1.86797	2.01514	2.05075	2.02501	1.73668	1.59261	1.58611	1.71549	1.68366	1.63078	1.68956	1.6655	1.67453	1.66212	1.64164	1.41096	1.42516	NA
Serbia	NA	NA	NA	NA	NA	NA	NA	NA	NA	NA	NA	NA	NA	NA	NA	NA	NA	NA	NA	NA	NA	NA	NA	NA	NA	NA	0.77822	0.76824	0.74762	0.74543	0.77456	NA
Slovakia	NA	NA	NA	NA	NA	NA	NA	NA	NA	NA	NA	NA	NA	0.77884	0.7458	0.80378	0.78591	0.77533	0.77298	0.76946	0.78498	0.82957	0.84408	0.82019	0.80533	0.83036	0.81948	0.79151	0.80208	0.72467	0.77205	0.73283
Slovenia	NA	NA	NA	NA	NA	NA	NA	NA	NA	NA	NA	NA	0.22947	0.23469	0.24616	0.27732	0.30619	0.29136	0.29111	0.29421	0.29282	0.29895	0.30204	0.30098	0.31417	0.3193	0.31761	0.31862	0.33989	0.30802	0.30953	0.30403
Spain	3.04408	3.09005	3.33173	3.41925	3.25094	3.33717	3.39223	3.49437	3.74424	3.85778	3.92295	4.14693	4.11966	4.02096	4.18134	4.31443	4.40675	4.6969	4.92156	5.1666	5.54154	5.78945	5.83067	6.13748	6.34354	6.44556	6.4938	6.76091	6.52779	6.10063	6.23946	6.0968
Sweden	2.0745	2.04197	1.88243	1.93752	2.03011	2.16753	2.19951	2.26714	2.23013	2.19853	2.21898	2.21453	2.24492	2.24428	2.25953	2.30952	2.27326	2.31767	2.40288	2.36802	2.27081	2.40492	2.27707	2.16972	2.30924	2.33275	2.21398	2.28591	2.22166	2.05075	2.22204	2.14353
Switzerland	1.13929	1.05743	1.03484	1.08662	1.06238	1.15513	1.16494	1.16849	1.18795	1.1524	1.18118	1.22301	1.23497	1.22616	1.24585	1.23972	1.21469	1.23543	1.26465	1.32588	1.29678	1.35071	1.28496	1.30302	1.31289	1.26341	1.28603	1.3027	1.31995	1.2873	1.26518	1.25502
Turkey	1.04087	0.97646	1.12445	1.16247	1.22581	1.33405	1.49782	1.65551	1.70408	1.80295	1.97311	2.06439	2.12734	2.32763	2.22973	2.48993	2.74792	2.92616	2.99442	2.90565	3.16279	2.89384	3.14597	3.31735	3.51199	3.73432	4.07083	4.4552	4.29029	4.29655	4.48981	4.95162
United Kingdom	8.84074	8.51623	8.37158	8.40572	8.45009	8.73387	8.90013	9.04893	9.05235	9.29279	9.27058	9.51965	9.27266	9.56983	9.53401	9.4535	10.0481	9.75484	9.74074	9.79273	9.72914	9.88082	9.93318	9.97834	10.02772	9.84463	9.72876	9.56105	9.28664	8.78475	8.91401	8.51752
Eurasia	46.73513	47.22093	49.26201	50.41837	53.41549	55.68861	57.47549	58.82369	60.75979	60.06916	60.97528	57.60298	52.99779	47.60436	44.03279	42.22312	39.75196	37.60099	37.07495	38.14429	39.18995	38.86752	40.23104	41.64453	42.91998	43.00702	42.59499	44.02493	45.06215	40.37198	42.83648	NA
Armenia	NA	NA	NA	NA	NA	NA	NA	NA	NA	NA	NA	NA	0.19984	0.14554	0.13423	0.13419	0.16968	0.14562	0.15267	0.15564	0.16247	0.1646	0.16393	0.17541	0.18063	0.20159	0.2038	0.22112	0.21598	0.20127	0.21196	NA
Azerbaijan	NA	NA	NA	NA	NA	NA	NA	NA	NA	NA	NA	NA	0.9918	0.76598	0.76195	0.73143	0.64552	0.63778	0.5443	0.56342	0.52002	0.52053	0.59178	0.60157	0.63699	0.65892	0.69878	0.59244	0.71848	0.56673	0.55567	NA
Belarus	NA	NA	NA	NA	NA	NA	NA	NA	NA	NA	NA	NA	1.52941	1.24347	1.07594	1.00994	1.00954	0.99603	0.97627	0.98677	1.05214	0.96268	0.90747	0.98457	0.95177	1.12403	1.15433	1.15134	1.12029	1.05118	1.13123	NA
Estonia	NA	NA	NA	NA	NA	NA	NA	NA	NA	NA	NA	NA	0.29165	0.18966	0.18979	0.1756	0.22544	0.21632	0.23121	0.19226	0.19633	0.2039	0.2034	0.22366	0.23265	0.23315	0.22655	0.23105	0.22402	0.19773	0.22299	0.23283
Former U.S.S.R.	46.73513	47.22093	49.26201	50.41837	53.41549	55.68861	57.47549	58.82369	60.75979	60.06916	60.97528	57.60298	NA	NA	NA	NA	NA	NA	NA	NA	NA	NA	NA	NA	NA	NA	NA	NA	NA	NA	NA	NA
Georgia	NA	NA	NA	NA	NA	NA	NA	NA	NA	NA	NA	NA	0.32759	0.19109	0.1548	0.15086	0.15873	0.16348	0.16531	0.14406	0.13752	0.12619	0.14833	0.13288	0.1357	0.15153	0.13936	0.16648	0.1737	0.17753	0.19191	NA
Kazakhstan	NA	NA	NA	NA	NA	NA	NA	NA	NA	NA	NA	NA	3.42894	2.85513	2.29445	1.90435	1.96301	1.68726	1.62533	1.79159	1.83351	1.93523	1.99277	1.82516	2.18332	2.23411	2.37702	2.38347	2.36741	2.14318	2.25517	NA
Kyrgyzstan	NA	NA	NA	NA	NA	NA	NA	NA	NA	NA	NA	NA	0.29244	0.24353	0.2343	0.19044	0.22943	0.21813	0.21854	0.23592	0.24136	0.22777	0.19289	0.20385	0.21189	0.21021	0.21543	0.20304	0.17757	0.20701	0.20166	NA
Latvia	NA	NA	NA	NA	NA	NA	NA	NA	NA	NA	NA	NA	0.22314	0.16423	0.16171	0.17263	0.17215	0.16175	0.16027	0.14799	0.15412	0.16092	0.154	0.16071	0.17574	0.18543	0.18448	0.17261	0.16337	0.16488	0.16082	NA
Lithuania	NA	NA	NA	NA	NA	NA	NA	NA	NA	NA	NA	NA	0.47702	0.37634	0.35493	0.37862	0.3609	0.35896	0.39095	0.30442	0.2973	0.31679	0.34054	0.35264	0.35316	0.35257	0.35277	0.38586	0.37472	0.32429	0.26217	NA
Moldova	NA	NA	NA	NA	NA	NA	NA	NA	NA	NA	NA	NA	0.28316	0.20184	0.15647	0.1392	0.15137	0.15359	0.13853	0.11022	0.11014	0.10728	0.11896	0.1305	0.12268	0.1293	0.13827	0.12851	0.13351	0.11866	0.1186	NA
Russia	NA	NA	NA	NA	NA	NA	NA	NA	NA	NA	NA	NA	34.11636	30.58451	29.22575	27.9412	25.9227	24.39344	24.26904	25.33501	26.13934	25.70645	26.66264	27.4133	28.14579	27.92219	27.68692	28.69019	29.63247	27.68958	29.32178	32.77096
Tajikistan	NA	NA	NA	NA	NA	NA	NA	NA	NA	NA	NA	NA	0.28994	0.25421	0.25274	0.20849	0.22971	0.21884	0.2264	0.24174	0.23909	0.24705	0.25201	0.27054	0.27419	0.28425	0.28025	0.27243	0.25661	0.18682	0.19051	NA
Turkmenistan	NA	NA	NA	NA	NA	NA	NA	NA	NA	NA	NA	NA	0.31126	0.27038	0.28682	0.30405	0.29793	0.30586	0.28061	0.31785	0.40112	0.50227	0.58452	0.75923	0.80707	0.83243	0.84142	0.89993	0.93194	0.88651	0.92312	NA
Ukraine	NA	NA	NA	NA	NA	NA	NA	NA	NA	NA	NA	NA	8.57337	8.08747	7.00352	6.91332	6.33645	6.06835	5.85075	5.75359	5.75077	5.64106	5.82163	6.2826	6.25436	6.32588	5.86877	6.29988	6.22468	4.45821	5.09354	NA
Uzbekistan	NA	NA	NA	NA	NA	NA	NA	NA	NA	NA	NA	NA	1.66187	2.03098	1.74539	1.8688	1.8794	1.87558	1.84477	1.86382	1.95472	2.04481	2.09616	2.12792	2.25405	2.1614	2.22683	2.22658	2.34739	1.99839	1.99535	NA
Middle East	5.83749	6.15628	6.37354	7.18191	7.85076	8.55686	9.16563	9.74435	10.32518	10.87565	11.21824	11.35877	12.27241	11.38602	13.57767	13.80819	14.56596	15.61828	16.2905	16.64119	17.35068	17.97316	19.01498	19.81524	20.96458	22.8694	23.94168	23.94363	26.09924	27.44746	28.73368	NA
Bahrain	0.13752	0.15787	0.16794	0.17792	0.17157	0.20492	0.22078	0.26522	0.22898	0.23439	0.25635	0.28713	0.24078	0.27663	0.28338	0.28363	0.28439	0.33517	0.35172	0.35646	0.36474	0.37722	0.39762	0.40773	0.41884	0.44726	0.48868	0.51317	0.53474	0.54327	0.55759	NA
Iran	1.58261	1.48862	1.70731	2.09302	2.22534	2.39652	2.42887	2.54105	2.70365	2.98498	3.10319	3.23565	3.35666	3.23408	3.68642	3.82582	3.96101	4.43353	4.58254	4.84077	5.02081	5.38611	5.88847	6.1875	6.40678	7.33526	7.67976	7.89703	8.09856	9.04268	9.10777	NA
Iraq	0.52402	0.48294	0.4624	0.55081	0.53817	0.56653	0.62292	0.63925	0.76751	0.82522	0.91771	0.6001	0.83887	0.84464	1.10244	1.13058	1.12469	1.04127	1.05605	1.07373	1.08419	1.13411	1.14428	1.0122	1.12508	1.23888	1.22646	1.30916	1.34034	1.45744	1.50018	NA
Israel	0.35096	0.36699	0.37468	0.36977	0.3814	0.35678	0.37165	0.39237	0.42507	0.44373	0.45182	0.47963	0.54028	0.53244	0.61975	0.62197	0.66144	0.71418	0.7261	0.73572	0.81131	0.87409	0.84092	0.85309	0.8555	0.87197	0.88416	0.91127	0.83252	0.87707	0.94537	0.97415
Jordan	0.07704	0.09157	0.10455	0.11201	0.11582	0.12027	0.12935	0.14108	0.13173	0.13508	0.14553	0.1376	0.16057	0.14067	0.1836	0.1931	0.20535	0.19888	0.21528	0.21447	0.22545	0.2202	0.23062	0.25148	0.27821	0.29423	0.30837	0.30975	0.30782	0.31309	0.32667	NA
Kuwait	0.48089	0.35214	0.35013	0.3885	0.4067	0.40268	0.45144	0.53896	0.61897	0.6963	0.44637	0.21583	0.3488	0.41377	0.57307	0.59178	0.74935	0.798	0.84566	0.86067	0.90963	0.88264	0.88761	0.96046	1.00698	1.14679	1.13313	1.12475	1.16169	1.21498	1.28347	NA
Lebanon	0.10473	0.09745	0.09447	0.09773	0.09399	0.10834	0.10323	0.10697	0.09781	0.07744	0.07142	0.11807	0.11896	0.14042	0.17031	0.18276	0.19219	0.21977	0.22429	0.23013	0.23433	0.22499	0.22859	0.23803	0.22844	0.21854	0.19424	0.17922	0.18233	0.28324	0.27604	NA
Oman	0.06467	0.06873	0.08358	0.09677	0.10035	0.11874	0.13477	0.13861	0.13042	0.16839	0.18358	0.20997	0.20445	0.22356	0.23685	0.22439	0.23107	0.26757	0.34683	0.30098	0.34089	0.34692	0.36024	0.3566	0.38096	0.48045	0.55125	0.58188	0.68767	0.75002	0.86701	NA
Palestinian Territories	NA	NA	NA	NA	NA	NA	NA	NA	NA	NA	NA	NA	NA	NA	NA	NA	NA	0.00957	0.01476	0.01499	0.01978	0.0266	0.02469	0.02643	0.04029	0.04934	0.05351	0.05453	0.05852	0.04525	0.04585	NA
Qatar	0.2143	0.202	0.23742	0.22323	0.26846	0.24321	0.25573	0.26227	0.26799	0.27809	0.34252	0.39711	0.47494	0.53468	0.55856	0.5629	0.57852	0.61006	0.62262	0.5938	0.64476	0.5025	0.5271	0.58437	0.70528	0.88637	0.95057	0.99146	1.01462	1.08657	1.10456	NA
Saudi Arabia	1.66331	2.02483	1.96743	2.12312	2.46675	2.71018	3.01461	3.07255	3.18356	3.12648	3.3474	3.49904	3.6636	2.90916	3.90046	3.82572	4.10441	4.3656	4.54323	4.60224	4.85276	5.1387	5.38353	5.76125	6.20771	6.52548	6.8456	6.18472	7.45005	7.22524	7.84894	8.75755
Syria	0.27405	0.28914	0.29523	0.33399	0.36831	0.38492	0.38388	0.43466	0.45274	0.48254	0.56278	0.52102	0.53779	0.5452	0.63357	0.60911	0.65218	0.69498	0.7525	0.77364	0.78206	0.76222	0.8197	0.82694	0.84518	0.80437	0.80649	0.80705	0.81778	0.9479	1.03228	NA
United Arab Emirates	0.26731	0.43622	0.41384	0.5109	0.58179	0.79708	0.90726	1.07115	1.17287	1.2686	1.22933	1.49165	1.61408	1.46204	1.49157	1.60656	1.66878	1.77107	1.83821	1.86471	1.8663	1.89112	2.05573	2.1047	2.21903	2.31365	2.53901	2.82421	3.29263	3.37142	3.53612	NA
Yemen	0.09609	0.09778	0.11456	0.10413	0.13211	0.14669	0.14115	0.14022	0.14387	0.15439	0.16025	0.16598	0.17264	0.12871	0.13769	0.14988	0.15258	0.15864	0.17072	0.17888	0.19367	0.20573	0.22587	0.24444	0.2463	0.25679	0.28046	0.25545	0.31997	0.28928	0.30183	NA
Africa	6.79621	6.99771	7.56437	7.91308	8.32584	8.50477	8.74902	8.97317	9.32286	9.27496	9.46917	9.84775	9.93929	9.3472	10.40208	10.65258	10.92841	11.40171	11.29667	11.63274	12.03873	12.62643	12.7111	13.34942	13.95348	14.48942	14.58177	14.99456	16.09403	15.92452	16.32675	NA
Algeria	0.80085	0.68005	0.9578	1.07399	1.15572	1.04784	1.0604	1.1349	1.20786	1.17025	1.2169	1.35505	1.29959	1.08345	1.23763	1.30333	1.26434	1.2026	1.25334	1.25165	1.23857	1.25615	1.27659	1.2927	1.26393	1.48134	1.54318	1.61954	1.72123	1.7988	1.79829	NA
Angola	0.05816	0.05805	0.0618	0.06667	0.05992	0.07307	0.07392	0.07532	0.07828	0.07641	0.07983	0.08283	0.08553	0.08089	0.08235	0.0876	0.08436	0.09326	0.08492	0.09419	0.09094	0.1193	0.12741	0.13525	0.14463	0.14764	0.1659	0.1862	0.19718	0.20883	0.23924	NA
Benin	0.00659	0.00662	0.00469	0.00686	0.00669	0.00787	0.00764	0.00598	0.00716	0.00768	0.00889	0.01017	0.01141	0.01244	0.01308	0.01428	0.01534	0.01668	0.01787	0.01954	0.02426	0.02449	0.02594	0.03053	0.03556	0.03725	0.04391	0.04767	0.05046	0.06582	0.07364	NA
Botswana	0.01518	0.01542	0.01436	0.014	0.01442	0.01906	0.02021	0.02299	0.02467	0.0282	0.03297	0.0342	0.03907	0.0369	0.03956	0.04291	0.03967	0.04159	0.04732	0.04831	0.05755	0.05139	0.05201	0.05007	0.05715	0.06134	0.06223	0.06069	0.06339	0.06514	0.0743	NA
Burkina Faso	0.00613	0.00617	0.00618	0.00621	0.00621	0.00591	0.00692	0.00722	0.00738	0.0066	0.00705	0.00812	0.00821	0.00866	0.01017	0.0104	0.01089	0.01705	0.01562	0.01608	0.01662	0.01662	0.01729	0.01803	0.01832	0.01877	0.01862	0.02082	0.02012	0.02564	0.02599	NA
Burundi	0.00159	0.0018	0.00159	0.00202	0.00259	0.00277	0.00281	0.00319	0.00471	0.00505	0.00548	0.00606	0.00577	0.00427	0.00674	0.00658	0.00668	0.00676	0.00671	0.00661	0.00658	0.00712	0.00727	0.00729	0.00667	0.00664	0.00644	0.00615	0.00406	0.00439	0.00468	NA
Cameroon	0.04713	0.05217	0.06048	0.06024	0.06116	0.06392	0.06991	0.06649	0.06631	0.07724	0.07769	0.07856	0.0788	0.05979	0.07455	0.07634	0.07601	0.08	0.08001	0.07822	0.08132	0.08165	0.07808	0.08387	0.08674	0.08577	0.09881	0.09902	0.10565	0.10857	0.12487	NA
Cape Verde	0.00454	0.00453	0.002	0.00196	0.00239	0.00236	0.0008	0.00089	0.00128	0.00137	0.00146	0.0015	0.00159	0.00137	0.00178	0.00174	0.00184	0.00184	0.00185	0.00185	0.00318	0.00214	0.00228	0.00227	0.00433	0.00373	0.0042	0.00493	0.00507	0.00552	0.00552	NA
Central African Republic	0.00274	0.00334	0.00358	0.00376	0.00363	0.00358	0.00427	0.0039	0.00412	0.00396	0.00424	0.00441	0.0045	0.00459	0.00484	0.00484	0.00489	0.005	0.00507	0.00507	0.00539	0.00549	0.00565	0.00567	0.00577	0.00565	0.00592	0.00633	0.00647	0.00609	0.00609	NA
Chad	0.00407	0.00389	0.00389	0.00389	0.00186	0.00222	0.00399	0.00348	0.00232	0.00238	0.00493	0.00461	0.00464	0.00194	0.00248	0.00247	0.00255	0.00257	0.00257	0.00257	0.00278	0.00284	0.00293	0.00293	0.00272	0.00302	0.00325	0.00379	0.00362	0.00364	0.00364	NA
Comoros	0.00063	0.00063	0.00063	0.00063	0.00064	0.00055	0.00055	0.00087	0.00091	0.00092	0.00118	0.00114	0.00114	0.0009	0.00118	0.00118	0.00118	0.00118	0.00123	0.00123	0.00136	0.00141	0.00146	0.00147	0.00151	0.00161	0.00163	0.00204	0.00214	0.00214	0.00186	NA
Congo (Brazzaville)	0.01194	0.01421	0.01282	0.01141	0.01205	0.01726	0.01512	0.01842	0.01503	0.01726	0.01927	0.01766	0.01681	0.01302	0.01455	0.01472	0.01546	0.01529	0.01435	0.01184	0.01302	0.016	0.0154	0.01722	0.01848	0.02482	0.02843	0.03386	0.03906	0.04784	0.06727	NA
Congo (Kinshasa)	0.09072	0.09277	0.09408	0.09741	0.09554	0.09769	0.10398	0.09915	0.10981	0.11239	0.10628	0.10518	0.11521	0.1074	0.09838	0.10828	0.10937	0.09877	0.09347	0.09292	0.09171	0.08267	0.07982	0.08113	0.09578	0.09882	0.1004	0.10656	0.10331	0.10511	0.11299	NA
Cote dIvoire (IvoryCoast)	0.07388	0.08135	0.07638	0.07388	0.06544	0.07711	0.07858	0.08658	0.0905	0.09075	0.07791	0.06585	0.06377	0.06313	0.07474	0.08127	0.10143	0.09546	0.09637	0.12522	0.13277	0.10998	0.10706	0.10877	0.11505	0.11335	0.114	0.11957	0.13064	0.12995	0.12381	NA
Djibouti	0.02205	0.0177	0.01779	0.01314	0.01096	0.01082	0.00974	0.00996	0.00973	0.02304	0.02326	0.02353	0.02359	0.02266	0.02427	0.02416	0.02416	0.0245	0.0245	0.0245	0.02465	0.02502	0.02506	0.02559	0.0259	0.02565	0.02374	0.02319	0.01642	0.01667	0.01667	NA
Egypt	0.70639	0.82834	0.92715	1.05147	1.15066	1.21268	1.24476	1.29745	1.30184	1.34836	1.43795	1.43262	1.42707	1.37148	1.55635	1.58777	1.72707	1.78967	1.84917	1.92281	2.0052	2.22517	2.25765	2.43298	2.58248	2.68931	2.53821	2.70984	3.1936	3.20306	3.30724	NA
Equatorial Guinea	0.00085	0.00084	0.00106	0.00106	0.00106	0.0012	0.00121	0.00116	0.00116	0.00168	0.00173	0.00182	0.00172	0.00181	0.00186	0.00185	0.0019	0.00204	0.00278	0.00278	0.00433	0.00354	0.04942	0.05064	0.0059	0.05036	0.05045	0.0588	0.05765	0.06384	0.06934	NA
Eritrea	NA	NA	NA	NA	NA	NA	NA	NA	NA	NA	NA	NA	NA	NA	0.01373	0.0152	0.01553	0.01574	0.01685	0.01422	0.00888	0.01052	0.00977	0.01103	0.01037	0.01036	0.01035	0.00973	0.01108	0.00714	0.00701	NA
Ethiopia	0.03009	0.03056	0.03403	0.03878	0.03855	0.04553	0.04451	0.05018	0.04922	0.05208	0.05321	0.04599	0.06159	0.05553	0.044	0.04756	0.03972	0.04016	0.0521	0.06112	0.06451	0.06956	0.0745	0.08134	0.08518	0.09097	0.10302	0.11177	0.13166	0.13029	0.13678	NA
Gabon	0.02842	0.03203	0.03022	0.04146	0.03733	0.03172	0.02869	0.03333	0.0353	0.04399	0.04332	0.0443	0.04559	0.04055	0.04429	0.04181	0.04339	0.04574	0.04426	0.03995	0.03684	0.0382	0.03796	0.03898	0.0393	0.03826	0.04223	0.04342	0.05311	0.04194	0.04543	NA
Gambia, The	0.00224	0.00223	0.00223	0.00223	0.00246	0.00242	0.00225	0.0026	0.00269	0.00265	0.00271	0.00282	0.00282	0.00299	0.00331	0.00309	0.00308	0.00309	0.00327	0.00327	0.00365	0.00392	0.00401	0.00406	0.00408	0.00423	0.00453	0.00559	0.00583	0.00623	0.00677	NA
Ghana	0.08608	0.08299	0.08261	0.05537	0.05144	0.05842	0.07788	0.08511	0.09327	0.10297	0.10037	0.10433	0.11333	0.10665	0.115	0.11703	0.12352	0.12183	0.09528	0.11604	0.14286	0.1419	0.13071	0.12545	0.14495	0.14937	0.15015	0.13327	0.14904	0.17244	0.19467	NA
Guinea	0.01374	0.0135	0.01372	0.01373	0.01406	0.01239	0.016	0.01676	0.01713	0.01665	0.02186	0.01738	0.01777	0.01674	0.0187	0.01865	0.01884	0.01978	0.0201	0.02096	0.02176	0.02345	0.02392	0.02207	0.02363	0.02358	0.02306	0.02344	0.02427	0.02445	0.02447	NA
Guinea-Bissau	0.00123	0.00123	0.00125	0.00125	0.00168	0.00181	0.00142	0.00262	0.00293	0.00307	0.00388	0.00397	0.004	0.00343	0.00437	0.00432	0.00436	0.00437	0.00437	0.00437	0.00485	0.0049	0.00508	0.00521	0.00518	0.00538	0.00533	0.00551	0.00541	0.00557	0.00557	NA
Kenya	0.09913	0.10191	0.10094	0.10042	0.09909	0.10318	0.10949	0.10052	0.1132	0.12209	0.12431	0.11496	0.12362	0.12181	0.13247	0.13777	0.14337	0.13408	0.14811	0.14138	0.14224	0.14413	0.14934	0.16118	0.16875	0.18298	0.20102	0.2022	0.18836	0.19759	0.21986	NA
Lesotho	0.00212	0.00192	0.00212	0.00212	0.00212	0.00219	0.0022	0.0022	0.0015	0.0022	0.00285	0.0029	0.00306	0.00311	0.00352	0.00357	0.0036	0.00355	0.0032	0.00467	0.00588	0.00598	0.00615	0.00635	0.00595	0.00662	0.00531	0.00566	0.00587	0.00552	0.00993	NA
Liberia	0.03184	0.02937	0.02955	0.02942	0.02581	0.0262	0.02118	0.01655	0.02054	0.01685	0.00814	0.00476	0.00483	0.0049	0.00533	0.00533	0.00553	0.00559	0.00577	0.00577	0.00616	0.00652	0.00705	0.00727	0.00735	0.00745	0.00858	0.00942	0.00844	0.00775	0.00753	NA
Libya	0.39743	0.3575	0.3539	0.38078	0.38419	0.42109	0.44198	0.45225	0.46429	0.48088	0.51011	0.53234	0.49646	0.44235	0.53086	0.55334	0.58466	0.61762	0.59319	0.55764	0.62988	0.66709	0.69699	0.68428	0.75794	0.77201	0.73147	0.75824	0.73771	0.77865	0.83996	NA
Madagascar	0.01891	0.01648	0.0152	0.01936	0.01928	0.02096	0.01523	0.02076	0.02275	0.01724	0.01698	0.01744	0.01853	0.01785	0.0209	0.02168	0.02227	0.02273	0.02332	0.02339	0.03093	0.03335	0.03755	0.03941	0.04278	0.04156	0.04108	0.04182	0.04563	0.03285	0.03292	NA
Malawi	0.01192	0.01244	0.01174	0.01072	0.01064	0.01132	0.01148	0.01196	0.01164	0.01306	0.0149	0.01725	0.01741	0.0165	0.01847	0.01906	0.01936	0.01949	0.02077	0.02152	0.02275	0.02291	0.02391	0.0244	0.02697	0.02836	0.02907	0.02984	0.03121	0.02984	0.03061	NA
Mali	0.00704	0.00907	0.00726	0.00741	0.00754	0.00814	0.00675	0.00767	0.00482	0.00835	0.00844	0.00868	0.00904	0.0093	0.00953	0.00956	0.00958	0.00988	0.01	0.01001	0.01023	0.01029	0.01102	0.0111	0.01144	0.0125	0.01163	0.01188	0.01213	0.01239	0.01256	NA
Mauritania	0.0092	0.00898	0.00909	0.00904	0.01316	0.01301	0.00741	0.01022	0.01311	0.01524	0.01356	0.0143	0.04602	0.03934	0.04727	0.04792	0.04817	0.04856	0.04874	0.04874	0.04976	0.04976	0.04748	0.04879	0.04151	0.04908	0.04206	0.03878	0.0438	0.02784	0.0279	NA
Mauritius	0.01366	0.01206	0.012	0.01287	0.01342	0.01444	0.01754	0.0155	0.0212	0.0251	0.02774	0.02774	0.03286	0.03086	0.03249	0.03554	0.03538	0.03581	0.03691	0.04068	0.05334	0.05851	0.05433	0.0567	0.05767	0.06037	0.06368	0.06784	0.06984	0.06384	0.0668	NA
Morocco	0.22621	0.21636	0.2182	0.22408	0.20998	0.22413	0.25189	0.25296	0.26609	0.29726	0.30899	0.31944	0.32663	0.30248	0.39049	0.37388	0.39885	0.40594	0.41548	0.43711	0.44701	0.4813	0.48821	0.49124	0.4923	0.49773	0.51652	0.52846	0.59814	0.64331	0.67296	NA
Mozambique	0.17546	0.06689	0.06445	0.08622	0.03419	0.03311	0.01812	0.01736	0.02463	0.02016	0.02036	0.02085	0.02042	0.02184	0.02133	0.02241	0.02159	0.02587	0.03217	0.07782	0.10073	0.13093	0.13324	0.13221	0.14246	0.15798	0.17698	0.18214	0.16984	0.18321	0.18078	NA
Namibia	NA	NA	NA	NA	NA	NA	NA	NA	NA	NA	0.03435	0.01809	0.01694	0.01796	0.0203	0.03191	0.03087	0.03002	0.03332	0.03856	0.0415	0.04742	0.0503	0.05393	0.0569	0.05861	0.0626	0.06488	0.0726	0.06967	0.06538	NA
Niger	0.00915	0.00951	0.00999	0.01031	0.01085	0.01088	0.00918	0.01015	0.01359	0.01419	0.01457	0.01466	0.01486	0.015	0.0154	0.01536	0.01526	0.01508	0.01515	0.01495	0.01511	0.0155	0.01645	0.01691	0.0182	0.01724	0.0169	0.01752	0.01309	0.01809	0.01834	NA
Nigeria	0.42228	0.51801	0.51696	0.51838	0.55649	0.59952	0.58736	0.61963	0.66323	0.71807	0.69886	0.7694	0.78635	0.74862	0.7432	0.83268	0.8494	0.85069	0.81581	0.81752	0.80941	0.91104	0.93475	0.97853	0.98351	1.08137	1.02946	0.98637	1.0381	0.67651	0.72951	NA
Reunion	0.01195	0.01261	0.01375	0.01546	0.01624	0.01672	0.01671	0.01822	0.01952	0.02169	0.02318	0.02508	0.02604	0.02653	0.03262	0.03241	0.0335	0.03404	0.04271	0.04275	0.04413	0.04593	0.04587	0.04595	0.04641	0.04728	0.0478	0.04898	0.05047	0.05208	0.05203	NA
Rwanda	0.00354	0.00645	0.00646	0.00729	0.01097	0.01128	0.01098	0.0113	0.01132	0.01174	0.01199	0.01214	0.01245	0.00873	0.01151	0.01169	0.01151	0.01186	0.01221	0.01184	0.01234	0.01233	0.01248	0.01278	0.01204	0.01248	0.01237	0.01108	0.0113	0.01213	0.01219	NA
Saint Helena	0	0.00004	0.00004	0.00004	0.00004	0.00004	0.00004	0.00009	0.00009	0.00009	0.00009	0.00004	0.00004	0.00009	0.00009	0.00009	0.00009	0.00009	0.00009	0.00009	0.00031	0.00018	0.00018	0.00018	0.00013	0.00018	0.00016	0.00018	0.00014	0.00013	0.00013	NA
Sao Tome and Principe	0.00054	0.00054	0.00055	0.00053	0.00055	0.00057	0.00056	0.00057	0.00057	0.00057	0.00105	0.0011	0.00114	0.00109	0.00119	0.00119	0.00118	0.00119	0.00118	0.0012	0.00138	0.00132	0.00139	0.0014	0.00138	0.00141	0.00158	0.00194	0.00196	0.00196	0.00195	NA
Senegal	0.03698	0.03586	0.03666	0.03503	0.04167	0.04088	0.04037	0.04066	0.03474	0.03616	0.03623	0.03353	0.04079	0.03462	0.05136	0.05531	0.05551	0.05104	0.05428	0.05974	0.06366	0.06364	0.06656	0.0685	0.07829	0.08372	0.0858	0.08716	0.08835	0.08611	0.08664	NA
Seychelles	0.00316	0.00253	0.00234	0.00405	0.00426	0.00437	0.00438	0.00467	0.00647	0.00686	0.0063	0.00678	0.00697	0.0071	0.00725	0.00729	0.00727	0.00782	0.00782	0.00782	0.0081	0.00835	0.01215	0.01185	0.01228	0.01209	0.016	0.01338	0.01472	0.01593	0.01342	NA
Sierra Leone	0.01057	0.01063	0.01141	0.01076	0.01071	0.01167	0.01259	0.01352	0.01472	0.01469	0.01482	0.01553	0.01135	0.00935	0.01052	0.01216	0.01213	0.01243	0.01247	0.01247	0.01335	0.01366	0.01389	0.01421	0.01682	0.01674	0.01659	0.01786	0.02122	0.01985	0.02034	NA
Somalia	0.01656	0.01929	0.01893	0.0185	0.0192	0.01888	0.02008	0.0149	0.01508	0.01535	0.01402	0.00835	0.00776	0.00767	0.00803	0.00803	0.00803	0.00803	0.00803	0.00803	0.00998	0.00998	0.00998	0.01009	0.00996	0.0101	0.01059	0.01194	0.01138	0.01125	0.01125	NA
South Africa	2.72828	2.95592	3.15803	3.18719	3.4528	3.51604	3.61766	3.66845	3.78098	3.55047	3.52342	3.67624	3.76193	3.67461	4.08411	4.10982	4.16526	4.55692	4.34929	4.46324	4.58373	4.64708	4.53578	4.87605	5.21505	5.12043	5.28755	5.41603	5.72952	5.62826	5.59303	NA
Sudan and South Sudan	0.05224	0.05595	0.06067	0.05867	0.05436	0.06154	0.06886	0.06705	0.07187	0.06886	0.06892	0.09321	0.08713	0.07537	0.07559	0.07125	0.07188	0.07335	0.07365	0.07956	0.10796	0.13557	0.13991	0.1539	0.1649	0.17682	0.19666	0.19178	0.2123	0.29356	0.30792	NA
Swaziland	0.01009	0.00962	0.00926	0.00736	0.00863	0.01076	0.01038	0.01143	0.01206	0.01258	0.01225	0.01219	0.0122	0.01112	0.01575	0.01567	0.01456	0.01122	0.01122	0.01677	0.01637	0.0165	0.0166	0.01529	0.01457	0.01435	0.01595	0.01813	0.01825	0.0174	0.01729	NA
Tanzania	0.03903	0.04366	0.04296	0.03983	0.04243	0.04312	0.04934	0.04561	0.04835	0.04975	0.0545	0.04977	0.05194	0.05324	0.04931	0.04887	0.05138	0.04795	0.05498	0.0582	0.0582	0.06861	0.07525	0.07626	0.08168	0.0904	0.09356	0.10957	0.11714	0.12382	0.12017	NA
Togo	0.00961	0.00903	0.00899	0.00932	0.01099	0.01074	0.00911	0.00872	0.00909	0.01039	0.01032	0.01682	0.01229	0.01038	0.01126	0.01229	0.01183	0.01119	0.01226	0.01739	0.02191	0.01588	0.02058	0.03206	0.03397	0.03354	0.03483	0.03759	0.04271	0.02184	0.02309	NA
Tunisia	0.12811	0.14107	0.13426	0.1532	0.16706	0.17057	0.18062	0.16845	0.17914	0.20375	0.20195	0.1976	0.19069	0.19936	0.2375	0.21225	0.23096	0.26778	0.28711	0.28948	0.30098	0.33625	0.33847	0.33078	0.33365	0.35827	0.33345	0.29423	0.3135	0.30028	0.30913	NA
Uganda	0.01594	0.01135	0.01296	0.01232	0.01351	0.01423	0.01522	0.01369	0.01772	0.01779	0.01941	0.0209	0.02324	0.02214	0.02433	0.02472	0.02541	0.02708	0.02918	0.02925	0.03282	0.03501	0.0365	0.03925	0.04059	0.04166	0.03901	0.04344	0.04429	0.05992	0.0625	NA
Western Sahara	0.00236	0.00235	0.00264	0.00256	0.00265	0.0027	0.00271	0.00279	0.00283	0.00283	0.00296	0.00296	0.003	0.00281	0.00292	0.00313	0.00313	0.00313	0.00313	0.00313	0.0036	0.00366	0.00366	0.00366	0.00364	0.00412	0.00365	0.00383	0.00364	0.00365	0.00365	NA
Zambia	0.13273	0.13411	0.13764	0.13438	0.13155	0.13022	0.12981	0.12025	0.12248	0.10338	0.1115	0.1076	0.11238	0.10341	0.1003	0.10138	0.09752	0.10684	0.10194	0.09909	0.09924	0.10487	0.10799	0.11254	0.11469	0.12143	0.12701	0.12644	0.12723	0.12534	0.13719	NA
Zimbabwe	0.15492	0.15579	0.1451	0.16407	0.155	0.15409	0.18422	0.19653	0.20166	0.20237	0.21972	0.23299	0.22742	0.20708	0.19898	0.19764	0.20376	0.19988	0.19983	0.22761	0.21215	0.19942	0.19982	0.19783	0.17606	0.19331	0.17486	0.17422	0.15068	0.15486	0.16368	NA
Asia & Oceania	48.89995	49.7354	50.42565	52.13463	56.59595	58.08453	60.46696	63.49111	68.15192	70.62057	73.40244	76.84082	79.54237	80.70657	88.98503	93.45342	96.85298	102.76842	103.85691	106.6436	110.69924	113.69411	119.59693	127.50517	137.70834	148.73139	157.61473	165.67443	171.98377	182.7097	193.6155	NA
Afghanistan	0.02698	0.03036	0.03234	0.0387	0.03913	0.03872	0.03976	0.06343	0.11162	0.1103	0.10904	0.04788	0.03233	0.03116	0.03132	0.02652	0.02645	0.02533	0.02461	0.02484	0.02384	0.01768	0.01823	0.01629	0.01612	0.01698	0.01854	0.0265	0.02967	0.09823	0.10445	NA
American Samoa	0.00593	0.00692	0.00962	0.00603	0.00695	0.00652	0.00673	0.00686	0.00676	0.00776	0.00807	0.00807	0.00827	0.00797	0.00803	0.0079	0.00801	0.00803	0.00803	0.00803	0.00784	0.00786	0.00799	0.00799	0.00795	0.00846	0.00861	0.00922	0.00856	0.00861	0.00417	NA
Australia	2.74282	2.82451	2.89413	2.95852	3.23291	3.26402	3.24834	3.43414	3.41915	3.61846	3.71364	3.70926	3.8123	3.91522	3.92119	4.03627	4.21412	4.54984	4.58179	4.80368	4.83335	5.00345	5.07292	5.1165	5.41692	5.64958	5.72146	5.9419	5.7874	5.76642	5.81146	5.60117
Bangladesh	0.12797	0.13932	0.15025	0.13998	0.16701	0.17329	0.18801	0.20723	0.22947	0.25175	0.25342	0.25726	0.28648	0.29877	0.33952	0.38176	0.38902	0.40315	0.41911	0.46537	0.50385	0.55256	0.584	0.63488	0.6751	0.71835	0.78022	0.81363	0.88801	0.96407	0.98901	NA
Bhutan	0.00015	0.00045	0.00058	0.00053	0.00048	0.00062	0.00278	0.00965	0.01213	0.01228	0.01303	0.01324	0.01349	0.01323	0.01482	0.01579	0.01751	0.01757	0.01704	0.0172	0.01725	0.01865	0.02075	0.02275	0.02039	0.02296	0.03515	0.04958	0.05312	0.05402	0.05681	NA
Brunei	0.08202	0.08518	0.09301	0.07288	0.06434	0.07673	0.05094	0.08183	0.07133	0.08277	0.07026	0.03869	0.05491	0.04865	0.05032	0.06192	0.05773	0.06159	0.05578	0.06268	0.0649	0.07311	0.08476	0.09008	0.10042	0.11918	0.18266	0.18816	0.19556	0.12763	0.14779	NA
Burma (Myanmar)	0.0695	0.07165	0.07937	0.09098	0.09891	0.10365	0.08891	0.08835	0.08415	0.08858	0.08565	0.08442	0.08816	0.09019	0.1107	0.11753	0.11905	0.12728	0.13868	0.14191	0.1675	0.16576	0.18845	0.2121	0.21775	0.28673	0.26736	0.28979	0.28615	0.24095	0.24075	NA
Cambodia	0.00455	0.0048	0.00534	0.00562	0.00614	0.00626	0.00653	0.00663	0.00691	0.00694	0.00702	0.00722	0.00744	0.00744	0.00763	0.02116	0.02339	0.02741	0.03201	0.03263	0.03411	0.0398	0.04281	0.04672	0.05206	0.05528	0.06078	0.06562	0.06871	0.06622	0.06118	NA
China	17.28743	17.19205	17.93384	19.00967	20.45343	21.00821	22.23982	23.76152	25.44871	25.96036	26.001	27.35981	28.46801	28.6451	32.4849	33.24969	34.98918	38.27189	39.54078	39.0181	40.93559	42.58023	47.29373	52.96116	59.47403	67.91528	74.28128	79.37118	84.94611	94.37119	100.88144	109.61959
Cook Islands	0.00042	0.00084	0.00082	0.00083	0.00083	0.00083	0.00076	0.00076	0.00076	0.00067	0.00067	0.00056	0.00067	0.00067	0.00067	0.00067	0.00067	0.00067	0.00067	0.00067	0.0008	0.0008	0.0008	0.0008	0.00089	0.00098	0.00103	0.00096	0.00101	0.00101	0.00101	NA
Fiji	0.01529	0.01577	0.01546	0.0132	0.01452	0.01464	0.01766	0.01474	0.01498	0.01718	0.01895	0.01619	0.0166	0.01577	0.0182	0.01939	0.01996	0.01987	0.0193	0.02123	0.02432	0.02626	0.03022	0.03655	0.03957	0.03893	0.04065	0.0405	0.04348	0.02431	0.02342	NA
French Polynesia	0.00312	0.00461	0.00624	0.00842	0.01271	0.01117	0.01396	0.01424	0.01435	0.01439	0.01375	0.01363	0.01333	0.01245	0.01081	0.01142	0.01148	0.01149	0.01167	0.01102	0.01072	0.01065	0.01126	0.01361	0.01366	0.01478	0.01609	0.0161	0.01742	0.01682	0.0169	NA
Guam	0.05329	0.0745	0.05799	0.05546	0.01909	0.0094	0.01564	0.01085	0.01126	0.01071	0.02594	0.02942	0.0351	0.04637	0.06643	0.05038	0.04479	0.05113	0.0422	0.047	0.03928	0.04231	0.02882	0.0331	0.0263	0.02938	0.03058	0.02752	0.02386	0.01457	0.01304	NA
Hawaiian Trade Zone	0.09468	0.10902	0.10042	0.09487	0.11496	0.1103	0.06534	NA	NA	NA	NA	NA	NA	NA	NA	NA	NA	NA	NA	NA	NA	NA	NA	NA	NA	NA	NA	NA	NA	NA	NA	NA
Hong Kong	0.2724	0.28356	0.31099	0.34283	0.35351	0.37015	0.39209	0.44013	0.49405	0.51427	0.50653	0.49495	0.55623	0.56629	0.59318	0.62864	0.68003	0.69036	0.72987	0.86455	0.80565	0.85755	0.92558	0.95826	1.06668	1.11214	1.09962	1.13409	1.0887	1.21474	1.26287	NA
India	4.04087	4.62703	4.73881	4.99261	5.65399	5.91415	6.35848	6.44899	7.04691	7.46151	7.87916	8.37387	8.85036	8.74138	9.95544	11.44322	10.89724	11.48628	12.02733	12.86891	13.33329	13.83718	13.66474	14.11354	15.31959	16.33149	17.63085	18.81378	19.90302	21.41704	21.9198	23.61068
Indonesia	1.16582	1.27211	1.30572	1.38502	1.46096	1.53516	1.65327	1.72279	1.84744	2.09257	2.30874	2.53466	2.63828	2.77514	3.10456	3.24227	3.53148	3.62664	3.50553	3.86352	3.87305	3.93491	4.08854	4.104	4.43032	4.64683	5.0977	5.32105	5.43696	5.80577	6.05509	NA
Japan	15.19765	15.12096	14.57132	14.29306	15.64557	15.69054	15.70954	16.1997	17.21189	17.74972	18.76828	19.31878	19.35087	19.53318	20.33497	20.942	21.30911	21.84425	21.46463	21.9438	22.41466	22.20305	22.11821	22.60477	23.242	23.1348	22.86986	23.04962	21.89256	20.69509	21.77269	20.82308
Kiribati	0.00034	0.0004	0.0004	0.0004	0.00029	0.00029	0.00026	0.00031	0.00031	0.00031	0.00031	0.00037	0.00031	0.00031	0.00031	0.00031	0.00031	0.00031	0.00031	0.00031	0.00035	0.00035	0.00045	0.00045	0.00045	0.00054	0.00054	0.00057	0.00053	0.00087	0.00087	NA
Korea, North	1.32754	1.37409	1.43933	1.50349	1.54723	1.62406	1.61938	1.56274	1.9215	1.57464	1.53212	1.49528	1.31677	1.21589	1.14549	1.06627	0.91771	0.83831	0.75979	0.82353	0.85941	0.88168	0.85064	0.87877	0.89887	0.93287	0.93706	0.80423	0.88522	0.8345	0.81923	NA
Korea, South	1.75836	1.82226	1.83276	2.01014	2.13481	2.30592	2.5749	2.81632	3.12305	3.39632	3.84131	4.34329	4.83041	5.39184	5.83614	6.3618	6.74567	7.32742	6.90261	7.47171	7.8348	8.10102	8.51247	8.76202	9.00854	9.33207	9.44994	9.83603	9.8871	9.97149	10.7827	11.16071
Laos	0.01311	0.01129	0.01159	0.01078	0.00965	0.00939	0.00969	0.0077	0.00724	0.00908	0.01017	0.01069	0.01087	0.01009	0.01107	0.0137	0.01608	0.01722	0.02297	0.02821	0.03448	0.03469	0.0359	0.03366	0.03681	0.03848	0.04005	0.04305	0.04681	0.04636	0.04524	NA
Macau	0.00698	0.00655	0.00699	0.00985	0.01087	0.00893	0.01241	0.01384	0.01374	0.01474	0.01513	0.0152	0.0157	0.01616	0.01852	0.01879	0.0209	0.0214	0.02302	0.02444	0.02211	0.02369	0.02586	0.02686	0.03248	0.02857	0.03522	0.03774	0.04144	0.03313	0.03069	NA
Malaysia	0.41839	0.43884	0.45554	0.51398	0.61396	0.69926	0.74984	0.75377	0.79964	0.86664	0.97969	1.0869	1.13703	1.16581	1.42724	1.4696	1.64099	1.67019	1.68847	1.74295	1.97785	2.10768	2.19218	2.26849	2.26098	2.28943	2.36515	2.59795	2.67668	2.78314	2.98849	NA
Maldives	0.00021	0.00021	0.00021	0.00021	0.00083	0.0009	0.00114	0.00114	0.00123	0.00123	0.00136	0.00136	0.00141	0.00171	0.00342	0.00483	0.0049	0.00433	0.00468	0.00468	0.00663	0.00713	0.01307	0.0147	0.01027	0.00823	0.01136	0.01279	0.01313	0.01459	0.01459	NA
Mongolia	0.08316	0.07573	0.09037	0.09304	0.0942	0.10401	0.11106	0.11697	0.1212	0.11563	0.10901	0.12917	0.11171	0.10046	0.0948	0.10003	0.07572	0.06211	0.06221	0.06154	0.06313	0.06517	0.06955	0.06646	0.07102	0.07177	0.08214	0.08515	0.09026	0.09005	0.09273	NA
Nauru	0.0019	0.00192	0.00192	0.00192	0.00198	0.00197	0.00197	0.00197	0.00196	0.00197	0.00205	0.00205	0.00209	0.00209	0.0021	0.00214	0.00213	0.00214	0.00214	0.00214	0.00213	0.00214	0.00223	0.00223	0.00226	0.00231	0.00226	0.0023	0.00231	0.00237	0.00237	NA
Nepal	0.00827	0.0076	0.00974	0.01093	0.01271	0.01102	0.01392	0.0165	0.01656	0.01667	0.01795	0.02188	0.02353	0.02274	0.02706	0.03035	0.03421	0.03694	0.04958	0.05684	0.05805	0.06212	0.0586	0.06154	0.0631	0.06936	0.06769	0.06982	0.07047	0.07898	0.08436	NA
New Caledonia	0.02755	0.02651	0.02087	0.01782	0.02156	0.02264	0.02233	0.02183	0.02386	0.02615	0.02489	0.02548	0.02623	0.02572	0.02599	0.02644	0.02728	0.02536	0.026	0.02653	0.02974	0.0292	0.03227	0.03324	0.03547	0.03513	0.04069	0.0412	0.04466	0.04242	0.04287	NA
New Zealand	0.49761	0.49292	0.50297	0.52849	0.56337	0.57527	0.62357	0.62883	0.67438	0.67436	0.70599	0.71003	0.70209	0.72462	0.771	0.77638	0.7685	0.78521	0.77319	0.81135	0.82614	0.83579	0.85376	0.84516	0.87666	0.84479	0.86117	0.86163	0.85232	0.84236	0.85742	0.86438
Niue	0.00004	0.00004	0.00004	0.00004	0.00004	0.00004	0.00004	0.00004	0.00004	0.00004	0.00004	0.00004	0.00004	0.00004	0.00004	0.00004	0.00004	0.00004	0.00004	0.00004	0.00004	0.00004	0.00004	0.00004	0.00004	0.00006	0.00007	0.00007	0.00005	0.00005	0.00005	NA
Pakistan	0.63141	0.68508	0.78194	0.79211	0.81937	0.87242	0.93272	1.00649	1.07839	1.13443	1.17658	1.24869	1.30998	1.35773	1.5331	1.58131	1.66887	1.69189	1.71871	1.80415	1.84612	1.79929	1.81339	1.91194	1.96634	2.13909	2.38416	2.48149	2.47811	2.50371	2.55969	NA
Papua New Guinea	0.02903	0.02892	0.02886	0.02972	0.0335	0.03514	0.03586	0.03907	0.0368	0.03777	0.03829	0.03802	0.03996	0.04005	0.03886	0.04525	0.04704	0.04448	0.04474	0.04526	0.04557	0.04578	0.06074	0.06931	0.06853	0.06962	0.07245	0.07309	0.08396	0.05778	0.05858	NA
Philippines	0.55327	0.53651	0.54076	0.52365	0.5028	0.48589	0.49218	0.55121	0.59046	0.65935	0.67806	0.67665	0.71794	0.7397	0.8428	0.90459	0.96042	1.01646	1.04219	1.1119	1.13956	1.12599	1.14734	1.18464	1.21389	1.2158	1.20589	1.17952	1.20299	1.14336	1.21734	NA
Samoa	0.00145	0.00154	0.00171	0.00171	0.00222	0.00181	0.00184	0.00182	0.00182	0.00193	0.00202	0.00202	0.00211	0.00211	0.00202	0.00217	0.0022	0.00224	0.00229	0.00234	0.00234	0.00248	0.0027	0.00263	0.00265	0.00279	0.00275	0.00281	0.00282	0.00286	0.00287	NA
Singapore	0.44171	0.46278	0.49037	0.48736	0.51378	0.49804	0.57213	0.63386	0.67652	0.7329	0.80437	0.85962	0.97456	0.96674	1.17263	1.19025	1.35675	1.45578	1.50448	1.49027	1.52664	1.62081	1.60212	1.69219	1.90294	2.03676	2.08333	2.26036	2.53059	2.89374	3.37195	NA
Solomon Islands	0.00147	0.00208	0.00189	0.00209	0.0021	0.00183	0.00184	0.00212	0.00233	0.00242	0.00247	0.00247	0.00242	0.00223	0.00234	0.00242	0.00242	0.00242	0.00242	0.00242	0.0025	0.00251	0.0026	0.0026	0.00267	0.00294	0.00273	0.00303	0.00294	0.00273	0.003	NA
Sri Lanka	0.0883	0.08934	0.09251	0.09056	0.10712	0.09586	0.09848	0.10326	0.09914	0.09549	0.10563	0.10529	0.10714	0.11889	0.13631	0.14655	0.14603	0.16136	0.16774	0.17986	0.18938	0.18644	0.18871	0.20061	0.19925	0.2195	0.21647	0.22235	0.22215	0.22402	0.22781	NA
Taiwan	1.11685	1.07033	1.0703	1.22045	1.41214	1.45643	1.55603	1.66344	1.79761	1.91653	2.02747	2.08166	2.19362	2.12023	2.57914	2.83434	3.03307	3.1756	3.3658	3.5464	3.80833	3.85665	4.09014	4.2601	4.39973	4.435	4.56696	4.61181	4.56075	4.49634	4.82987	NA
Thailand	0.50786	0.54449	0.53202	0.56767	0.6305	0.70186	0.7224	0.79284	0.90767	1.07364	1.25451	1.37084	1.46711	1.5766	1.86981	2.11672	2.44968	2.59492	2.43736	2.50252	2.57173	2.69236	2.93221	3.20772	3.44176	3.65174	3.70545	3.83697	3.95005	4.05101	4.32479	NA
Timor-Leste (East Timor)	NA	NA	NA	NA	NA	NA	NA	NA	NA	NA	NA	NA	NA	NA	NA	NA	NA	NA	NA	NA	NA	NA	NA	0.0023	0.0025	0.00249	0.00254	0.00462	0.00479	0.00262	0.00262	NA
Tonga	0.00043	0.00064	0.00059	0.00064	0.00064	0.00066	0.00066	0.00097	0.00115	0.00125	0.00125	0.00142	0.00141	0.00141	0.00165	0.00165	0.00183	0.00188	0.00183	0.00183	0.00187	0.00178	0.00159	0.00159	0.00171	0.00208	0.00246	0.00252	0.00253	0.00252	0.00252	NA
U.S. Pacific Islands	0.00219	0.00218	0.00218	0.00218	0.00206	0.00202	0.00217	0.00217	0.00286	0.00425	0.00438	0.00438	0.00441	0.00423	0.00434	0.00447	0.00454	0.00446	0.00446	0.00441	0.0044	0.00442	0.00434	0.00434	0.00431	0.00432	0.00442	0.0045	0.00507	0.00441	0.00513	NA
Vanuatu	0.00172	0.0015	0.00151	0.00147	0.00154	0.00167	0.00167	0.0016	0.00189	0.00168	0.00177	0.00139	0.00092	0.00087	0.00092	0.00092	0.00092	0.00092	0.00092	0.00092	0.00118	0.00118	0.00127	0.00127	0.00131	0.0014	0.00136	0.00158	0.00143	0.00175	0.00175	NA
Vietnam	0.17136	0.16951	0.18354	0.18621	0.19248	0.21448	0.1915	0.22003	0.20047	0.24265	0.26463	0.28084	0.29175	0.33307	0.367	0.47714	0.56711	0.58366	0.61132	0.68331	0.73608	0.81314	0.90187	0.97817	1.06511	1.17323	1.30862	1.4182	1.63544	1.67657	1.86492	NA
Wake Island	0.01857	0.01852	0.01852	0.01852	0.01874	0.01838	0.01843	0.01843	0.01824	0.01829	0.01784	0.01784	0.01806	0.01625	0.01823	0.01841	0.01845	0.01861	0.01861	0.01861	0.0187	0.01875	0.01907	0.01907	0.01896	0.01888	0.01937	0.01986	0.01888	0.01932	0.01916	NA
World	283.15073	280.929	280.52182	284.34042	299.68878	307.05602	314.71988	324.53488	337.03797	342.81426	346.02343	347.2125	347.19372	342.17331	355.16424	362.94968	372.10237	379.21096	382.05542	389.15842	400.07194	402.27059	412.21126	425.87377	444.69444	459.29216	470.14802	482.86461	490.68974	487.58009	510.55101	NA
