# Supplementary material
Source: MDPI journal article supplement (https://www.mdpi.com/1099-4300/15/12/5565)
Supplement: s2 [file s2 › Sources/Figure 1/Figure 1.csv]

	World Population (Billions)	World Total Power Consumption (TeraWatts)	World Total CO2 Emissions (Billion Metric Tons per Year)	World Power Consumption per Billion Capita (TeraWatts)	World CO2 Emissions per Billion Capita (Billion Metric Tons per Year)	Carbon Intensity (Grams per MegaJoule)
1980	4.44808407	9.466622409244	18.43301259	2.12824718693862	4.14403421786045	61.703500014337
1981	4.53087408	9.392342755796	18.19860076	2.07296486063369	4.0165761481502	61.4005977505199
1982	4.61079477	9.378730012652	18.09260439	2.03408099481556	3.92396653776893	61.1315753562874
1983	4.69180472	9.506397122222	18.24213085	2.02617067195883	3.88808399723849	60.8090401729959
1984	4.77040823	10.019525590074	19.10639996	2.10034971998067	4.00519180724288	60.4282810487805
1985	4.85205216	10.265827107536	19.44994508	2.11577014611813	4.00860181189808	60.0389333644307
1986	4.93596023	10.522064028476	19.84968569	2.13171572261149	4.02144360267668	59.7807320054405
1987	5.02243943	10.850210843472	20.40178352	2.16034677863143	4.06212634405031	59.5852124250887
1988	5.10956043	11.268225634666	21.07918947	2.20532192329233	4.12544087867848	59.2798242395711
1989	5.19615475	11.461349323424	21.38090413	2.20573671779579	4.11475507537569	59.1151575487588
1990	5.28488466	11.568641450366	21.52294564	2.18900547403167	4.07254784629491	58.9559826287452
1991	5.36789305	11.608392091296	21.43137397	2.1625602416382	3.99251135787812	58.5041239470667
1992	5.45284877	11.607766552382	21.3463229	2.12875270193529	3.91471023686578	58.2750887800452
1993	5.53524282	11.439917511022	21.50212438	2.06674176418913	3.88458556909343	59.5616899178977
1994	5.61943972	11.874247132748	21.64882699	2.11306602159761	3.85248851641743	57.774583164444
1995	5.70046576	12.13453718477	22.00960615	2.12869223246944	3.86101891961895	57.4774627715288
1996	5.78087764	12.440544402286	22.50737902	2.15201655821347	3.89341903109369	57.3316014718552
1997	5.85957354	12.678209069526	23.04398363	2.16367436691067	3.93270661639311	57.5981034266357
1998	5.93705618	12.77330903849	23.1461007	2.15145497216602	3.89858205788445	57.4226132689739
1999	6.01415946	13.010785141354	23.45902269	2.16335885802303	3.90063197459683	57.136672533357
2000	6.09086864	13.375661220922	24.14971881	2.19601866523294	3.96490553931894	57.2144005989813
2001	6.16765972	13.449165888158	24.24387495	2.18059466616586	3.93080618105177	57.1235539571273
2002	6.24444439	13.781516284536	24.92466295	2.20700440644584	3.99149410152726	57.3113747366691
2003	6.32092699	14.2382987747	25.98850606	2.25256497934965	4.11150233203374	57.8404612493947
2004	6.39784159	14.867536091408	27.13412683	2.32383623168263	4.24113764748589	57.8342867190201
2005	6.47466212	15.355580482242	28.26151217	2.37164197878514	4.36494007659507	58.3227094664917
2006	6.55241814	15.71853246964	29.02916361	2.39889032320517	4.43029779079392	58.5236037406206
2007	6.63084498	16.143691978414	29.73323828	2.4346357103969	4.48407983743876	58.3643809058531
2008	6.70759568	16.405302315402	30.2559584	2.44577984393388	4.51070097892364	58.443364669815
2009	6.78578966	16.301348179116	30.23590748	2.40227725819547	4.45576845068316	58.7770816012151
2010	6.86318973	17.069420363996	31.50230201	2.48709725878378	4.59003805071844	58.4833243957436
2020	7.66	20.728708	36	2.70609765013055	4.69973890339426	55.0349785428016
2030	8.32	24.406382	41	2.933459375	4.92788461538461	53.2339860942929
2040	8.87	27.415388	46	3.09079909808343	5.18602029312289	53.1706500013788
