# Supplementary material
Source: MDPI journal article supplement (https://www.mdpi.com/1099-4300/15/12/5565)
Supplement: s2 [file s2 › Sources/Figure 2/Figure_2a.csv]

		1980	1981	1982	1983	1984	1985	1986	1987	1988	1989	1990	1991	1992	1993	1994	1995	1996	1997	1998	1999	2000	2001	2002	2003	2004	2005	2006	2007	2008	2009	2010	2011
Bermuda		0.00793	0.00686	0.00727	0.00771	0.00752	0.00741	0.007	0.00988	0.0108	0.01315	0.00928	0.00805	0.00647	0.00695	0.00743	0.00739	0.0075	0.00752	0.00752	0.00752	0.0075	0.00744	0.00752	0.00814	0.00869	0.00927	0.00922	0.01018	0.00981	0.00971	0.00955	0
Ca0da		9.79686	9.58952	9.20637	9.18989	9.78461	10.15233	10.25423	10.5858	11.05397	11.20107	10.98094	11.11813	11.46111	11.70439	12.0236	12.21439	12.55314	12.64884	12.34528	12.96829	13.30484	12.87242	13.09648	13.52567	14.11424	14.17242	13.8183	14.02585	13.54625	13.09711	13.00072	13.49477
Greenland		0.00791	0.00746	0.00722	0.00505	0.00799	0.00714	0.00462	0.00335	0.00777	0.00671	0.00787	0.00779	0.00687	0.00708	0.00719	0.00719	0.00728	0.00746	0.00756	0.00756	0.00772	0.00796	0.00805	0.00809	0.00813	0.00829	0.00846	0.00826	0.00917	0.00893	0.00893	0
Mexico		3.71845	4.10949	4.32049	4.04957	4.16918	4.40226	4.32653	4.46445	4.53802	4.78677	4.65663	4.96898	5.07372	5.14468	5.34952	5.26286	5.48104	5.64601	5.94557	6.05728	6.33194	6.29111	6.28657	6.41137	6.42585	6.73068	7.29561	7.5267	7.26255	6.94764	7.28397	7.8079
Saint Pierre and Miquelon		0.0022	0.00221	0.00203	0.00221	0.00216	0.00191	0.0024	0.00306	0.00319	0.00365	0.00359	0.00341	0.00318	0.00174	0.00183	0.00122	0.00121	0.00083	0.00096	0.00096	0.00105	0.00096	0.00096	0.00105	0.00113	0.00117	0.00118	0.00122	0.00123	0.00122	0.00122	0
United States		78.06668	76.10575	73.09919	72.97055	76.63174	76.3924	76.64702	79.05446	82.70921	84.78595	84.48516	84.43798	85.78297	87.42359	89.09138	91.02906	94.02221	94.60223	95.01791	96.65197	98.8145	96.16811	97.6451	97.97761	100.16178	100.28151	99.62944	101.29594	99.27451	94.55912	98.04105	97.26245
Antarctica		0.00213	0.00213	0.00212	0.00213	0.0027	0.00304	0.00275	0.00283	0.00291	0.00288	0.00292	0.00305	0.00304	0.00304	0.00305	0.00314	0.00313	0.00314	0.00314	0.00314	0.00313	0.00318	0.00318	0.00327	0.00325	0.0035	0.0035	0.00337	0.00376	0.00339	0.00105	0
Antigua and Barbuda		0.00598	0.00531	0.00711	0.00415	0.0047	0.00461	0.00462	0.00564	0.0058	0.00582	0.00608	0.006	0.00598	0.00588	0.00661	0.00679	0.00677	0.00705	0.00705	0.00705	0.00725	0.00727	0.00732	0.00776	0.00836	0.00909	0.00927	0.00891	0.00973	0.00943	0.00941	0
Argenti0		1.64051	1.59727	1.67291	1.69301	1.83715	1.74184	1.89741	1.95164	1.95674	1.93995	1.87408	1.97165	2.04721	1.97028	2.243	2.31176	2.39434	2.46399	2.5753	2.60422	2.66876	2.61239	2.48186	2.66675	2.7809	2.95491	3.13524	3.27338	3.35163	3.30164	3.34874	0
Aruba		0	0	0	0	0	0	0.00146	0.00146	0.00556	0.00747	0.00787	0.00858	0.00921	0.0089	0.0104	0.01201	0.0079	0.01264	0.01277	0.01277	0.01349	0.01353	0.01353	0.01442	0.01452	0.01487	0.01597	0.01461	0.01407	0.01449	0.01517	0
Bahamas, The		0.0599	0.06326	0.0541	0.04065	0.03669	0.03321	0.03275	0.03622	0.0338	0.03847	0.04116	0.0365	0.03061	0.02965	0.03625	0.04254	0.04778	0.04751	0.0536	0.04834	0.04749	0.0466	0.0469	0.0566	0.0572	0.0658	0.06591	0.06274	0.07109	0.04867	0.04867	0
Barbados		0.01446	0.0153	0.01527	0.01613	0.01555	0.01715	0.01826	0.01731	0.01645	0.01773	0.0184	0.01857	0.01877	0.01777	0.018	0.01844	0.0164	0.02033	0.02098	0.0215	0.02378	0.02293	0.02293	0.02335	0.01599	0.0216	0.0206	0.01865	0.01746	0.02054	0.0193	0
Belize		0.00371	0.00344	0.00325	0.00325	0.00351	0.00352	0.00421	0.00348	0.00262	0.00362	0.00495	0.00548	0.00474	0.00442	0.00449	0.00552	0.00495	0.0075	0.00747	0.00767	0.01074	0.01431	0.01376	0.01409	0.01513	0.01598	0.01709	0.01752	0.01782	0.01193	0.0125	0
Bolivia		0.07454	0.0834	0.07371	0.07562	0.07319	0.06694	0.06835	0.06706	0.07765	0.08738	0.09259	0.09112	0.09799	0.08437	0.10828	0.12332	0.12122	0.13546	0.12563	0.14117	0.16192	0.14481	0.157	0.19835	0.20213	0.20023	0.22594	0.23317	0.24958	0.22976	0.23258	0
Brazil		4.02179	3.88321	3.94323	3.94192	4.30882	4.59267	4.9686	5.11182	5.28481	5.44799	5.75431	5.99591	6.07731	5.0104	6.62072	7.02034	7.45336	7.85629	8.11133	8.25842	8.53326	8.44866	8.55386	8.66412	8.99638	9.35596	9.69969	10.12882	10.33828	10.42654	11.29911	11.6573
Cayman Islands		0.00144	0.00155	0.00155	0.00151	0.00155	0.00159	0.0016	0.00163	0.00382	0.00388	0.00396	0.00422	0.0043	0.00386	0.00445	0.00483	0.00486	0.00487	0.00496	0.00496	0.0049	0.00496	0.00496	0.00514	0.00551	0.00578	0.00657	0.00757	0.00925	0.00774	0.00778	0
Chile		0.42668	0.41949	0.37365	0.37945	0.39224	0.39888	0.38895	0.41039	0.44866	0.50603	0.57143	0.5706	0.61665	0.62062	0.70588	0.78044	0.84226	0.95505	0.93508	0.98803	1.01272	1.04667	1.0647	1.11922	1.19658	1.27932	1.31642	1.0911	1.34684	1.29926	1.33341	1.35782
Colombia		0.69636	0.71547	0.76684	0.77864	0.85268	0.86345	0.90079	0.82399	0.91932	0.95303	0.88984	0.96652	0.97614	1.00023	1.09987	1.09449	1.18949	1.22756	1.23964	1.17921	1.17201	1.16349	1.16015	1.20249	1.21593	1.26835	1.31278	1.33293	1.34274	1.33538	1.36665	0
Costa Rica		0.05545	0.0572	0.0558	0.06133	0.05911	0.05935	0.05825	0.06449	0.06984	0.07579	0.0744	0.07934	0.093	0.0976	0.10293	0.1059	0.10708	0.11854	0.12158	0.13348	0.14104	0.14556	0.15333	0.15957	0.16397	0.16188	0.17481	0.18426	0.19038	0.18469	0.18718	0
Cuba		0.45633	0.46398	0.50137	0.45973	0.47576	0.48409	0.50085	0.49279	0.50004	0.51029	0.50176	0.46286	0.40903	0.37085	0.41167	0.41897	0.42871	0.47225	0.44953	0.4568	0.45968	0.46595	0.46699	0.46354	0.51958	0.45093	0.35559	0.37219	0.35797	0.41463	0.39997	0
Dominica		0.00048	0.00061	0.0006	0.00067	0.00068	0.00073	0.00072	0.00077	0.00096	0.00101	0.00101	0.00101	0.00101	0.001	0.0012	0.00135	0.00135	0.00136	0.00147	0.00153	0.00148	0.00175	0.00191	0.00203	0.00188	0.0016	0.00195	0.00193	0.00204	0.00204	0.00214	0
Dominican Republic		0.08726	0.08641	0.09122	0.10872	0.09397	0.10676	0.10905	0.12611	0.13375	0.12745	0.13872	0.14124	0.14654	0.12852	0.14665	0.15912	0.1726	0.18204	0.18805	0.21787	0.23415	0.24458	0.25249	0.28608	0.27171	0.27188	0.28134	0.29372	0.29398	0.28108	0.28926	0
Ecuador		0.18651	0.19313	0.21098	0.19725	0.2079	0.2206	0.23703	0.2338	0.2423	0.2372	0.25381	0.26809	0.29819	0.25434	0.31462	0.30813	0.3324	0.34286	0.35013	0.33588	0.34462	0.3609	0.36515	0.37612	0.3921	0.40707	0.44521	0.47334	0.57449	0.53288	0.56297	0
El Salvador		0.04527	0.04153	0.04156	0.0424	0.04507	0.04512	0.04824	0.04681	0.05113	0.05198	0.05371	0.05309	0.06031	0.05704	0.06857	0.08432	0.08619	0.08659	0.09891	0.10382	0.10082	0.10523	0.10397	0.1135	0.11117	0.11716	0.12156	0.12288	0.12097	0.11837	0.12442	0
Falkland Islands (Islas Malvi0s)		0.00017	0.00017	0.00017	0.00017	0.00017	0.00022	0.00022	0.00022	0.00043	0.00039	0.00035	0.00035	0.00035	0.00035	0.00035	0.00039	0.00044	0.00048	0.00039	0.00039	0.00039	0.0004	0.00044	0.00044	0.00048	0.00053	0.00057	0.00065	0.00068	0.00067	0.00067	0
French Guia0		0.00515	0.00443	0.00565	0.00581	0.00463	0.00465	0.00542	0.00598	0.00706	0.00796	0.00951	0.01075	0.00861	0.01128	0.01169	0.01332	0.01329	0.01332	0.01355	0.01355	0.01369	0.01921	0.01969	0.02057	0.02019	0.021	0.02132	0.02097	0.0203	0.01847	0.02087	0
Gre0da		0.00067	0.00077	0.00085	0.00083	0.00085	0.00088	0.00098	0.00102	0.00111	0.00115	0.00178	0.00178	0.00183	0.00181	0.00237	0.00221	0.00244	0.00308	0.00278	0.00278	0.00181	0.00318	0.00345	0.00349	0.00352	0.00361	0.00381	0.00377	0.0039	0.00398	0.00397	0
Guadeloupe		0.00707	0.0101	0.01275	0.01339	0.01483	0.01341	0.01378	0.01567	0.01712	0.01916	0.02063	0.0216	0.02005	0.02142	0.02398	0.0246	0.02436	0.02481	0.02486	0.02486	0.02632	0.02679	0.02733	0.02931	0.02985	0.03126	0.03275	0.03631	0.03707	0.03188	0.03188	0
Guatemala		0.06717	0.05719	0.05804	0.063	0.05405	0.06058	0.06525	0.06536	0.07126	0.07487	0.08019	0.07816	0.08511	0.08435	0.10313	0.10917	0.11322	0.12286	0.14229	0.15264	0.15753	0.16974	0.1687	0.17628	0.19425	0.20438	0.20222	0.20965	0.19736	0.21336	0.21337	0
Guya0		0.02142	0.02434	0.01956	0.01726	0.01973	0.02005	0.01933	0.0147	0.01461	0.00977	0.00942	0.01085	0.01239	0.01523	0.01556	0.0133	0.01421	0.01557	0.0197	0.02096	0.0229	0.02354	0.02393	0.02341	0.02101	0.02313	0.022	0.02186	0.02235	0.02256	0.02244	0
Haiti		0.015	0.01088	0.0143	0.01285	0.01307	0.01495	0.01467	0.0213	0.02316	0.02134	0.01413	0.01418	0.01531	0.01099	0.01	0.01564	0.01822	0.02185	0.02161	0.02341	0.02408	0.02601	0.02652	0.02639	0.02686	0.02719	0.02785	0.02907	0.03579	0.03339	0.03097	0
Honduras		0.03317	0.03085	0.0315	0.0329	0.03382	0.03222	0.03763	0.03635	0.04547	0.05259	0.0593	0.05895	0.06051	0.05982	0.0609	0.06496	0.07339	0.07457	0.08028	0.08749	0.08601	0.09293	0.09775	0.10039	0.10937	0.11675	0.12283	0.13443	0.13243	0.12509	0.13198	0
Jamaica		0.11805	0.09955	0.08658	0.09239	0.07545	0.06769	0.06822	0.07341	0.08471	0.09729	0.10347	0.10548	0.11568	0.1129	0.12196	0.13443	0.1378	0.14507	0.14803	0.15221	0.14637	0.14699	0.15054	0.15637	0.15835	0.15258	0.17143	0.18033	0.17854	0.12778	0.12696	0
Martinique		0.00934	0.00919	0.00917	0.00906	0.00813	0.00979	0.01053	0.01194	0.01429	0.02028	0.02189	0.01806	0.02012	0.02504	0.02706	0.02766	0.02769	0.02772	0.02777	0.02777	0.02815	0.02841	0.02879	0.03002	0.03085	0.03266	0.03259	0.03382	0.03016	0.03605	0.0361	0
Montserrat		0.00026	0.00028	0.00028	0.00028	0.00028	0.00031	0.00031	0.00035	0.0004	0.0004	0.00053	0.00049	0.00057	0.00057	0.00057	0.00066	0.00062	0.00066	0.00071	0.00071	0.00075	0.00075	0.00075	0.00084	0.00092	0.00097	0.00106	0.00115	0.00117	0.00115	0.00115	0
Netherlands Antilles		0.23781	0.22241	0.21486	0.19761	0.18614	0.15532	0.1517	0.15405	0.14343	0.15139	0.14774	0.14015	0.13817	0.11235	0.14504	0.15289	0.1525	0.16189	0.16162	0.15601	0.15593	0.15784	0.15109	0.14478	0.14548	0.15318	0.16036	0.16864	0.19364	0.17341	0.16436	0
Nicaragua		0.03277	0.03356	0.03337	0.03173	0.03214	0.03573	0.03478	0.03609	0.03669	0.03994	0.03701	0.03531	0.03978	0.03772	0.04204	0.04486	0.04705	0.04856	0.05237	0.05658	0.05537	0.0591	0.06114	0.06242	0.06628	0.07106	0.07053	0.07157	0.07145	0.07015	0.07232	0
Pa0ma		0.18343	0.18621	0.17593	0.17807	0.18243	0.16576	0.17099	0.17813	0.1752	0.17082	0.18065	0.17912	0.18153	0.17581	0.20398	0.21583	0.19331	0.19884	0.20818	0.2049	0.20637	0.20344	0.20284	0.19682	0.2272	0.22021	0.2299	0.23553	0.23881	0.25028	0.27683	0
Paraguay		0.0279	0.02715	0.02639	0.02846	0.03129	0.05515	0.11264	0.1677	0.17444	0.21662	0.23076	0.2449	0.23047	0.25682	0.30165	0.34792	0.36317	0.40086	0.40787	0.42376	0.42971	0.37938	0.39444	0.4241	0.41508	0.40976	0.42508	0.4253	0.4405	0.43597	0.43752	0
Peru		0.40399	0.43033	0.42903	0.40122	0.41196	0.41853	0.4496	0.45514	0.45353	0.40696	0.38495	0.38181	0.37605	0.39742	0.45232	0.47403	0.50359	0.48611	0.50307	0.51302	0.52873	0.53776	0.54613	0.55734	0.58274	0.61903	0.67681	0.68496	0.76281	0.74815	0.84796	0
Puerto Rico		0.42761	0.45014	0.33107	0.3207	0.35934	0.31086	0.33724	0.35071	0.3202	0.3123	0.30014	0.37303	0.33257	0.30891	0.35589	0.36377	0.37427	0.38432	0.39356	0.32745	0.44069	0.47836	0.48162	0.51986	0.53042	0.51355	0.51434	0.42645	0.44085	0.39426	0.43966	0
Saint Kitts and Nevis		0.00075	0.00079	0.00091	0.00074	0.00075	0.00075	0.00075	0.00079	0.00092	0.00092	0.00092	0.00106	0.00105	0.00118	0.00141	0.00128	0.00145	0.00145	0.00145	0.00145	0.00145	0.00145	0.00145	0.00163	0.00179	0.00189	0.00249	0.00354	0.00355	0.00372	0.00372	0
Saint Lucia		0.00164	0.0013	0.00155	0.00143	0.00143	0.00176	0.00177	0.00198	0.00242	0.00243	0.00243	0.00243	0.00251	0.00229	0.00278	0.00283	0.00282	0.00296	0.00296	0.00296	0.00471	0.00494	0.00504	0.00552	0.00533	0.00532	0.00548	0.00577	0.00603	0.00587	0.00587	0
Saint Vincent/Gre0dines		0.00073	0.00069	0.00074	0.00074	0.00074	0.00085	0.00087	0.00095	0.00112	0.00149	0.00141	0.00125	0.0014	0.00125	0.002	0.00209	0.00208	0.00221	0.00261	0.00261	0.00269	0.00268	0.00284	0.00296	0.00318	0.00317	0.0031	0.00314	0.00316	0.00314	0.00317	0
Suri0me		0.04058	0.03563	0.03487	0.0247	0.02339	0.02843	0.02605	0.01907	0.02224	0.03013	0.03454	0.03523	0.03449	0.03413	0.03533	0.03394	0.03357	0.03409	0.03431	0.03452	0.02927	0.03074	0.032	0.03275	0.03364	0.03496	0.03608	0.03571	0.03577	0.03637	0.03585	0
Trinidad and Tobago		0.17413	0.16712	0.16779	0.18491	0.25078	0.27406	0.20582	0.19155	0.19772	0.21256	0.22627	0.25308	0.24797	0.26419	0.31133	0.32539	0.35887	0.3891	0.3875	0.3986	0.42055	0.47354	0.49998	0.53889	0.59	0.67327	0.82112	0.82411	0.89599	0.85012	0.93624	0
Turks and Caicos Islands		0	0	0	0	0	0	0	0	0	0	0	0	0	0	0	0.00019	0.00019	0.00019	0.00021	0.00021	0.00039	0.00023	0.00018	0.00018	0.00017	0.00018	0.00017	0.001	0.00222	0.00226	0.00226	0
Uruguay		0.10936	0.10367	0.0985	0.12028	0.11708	0.10847	0.11381	0.12167	0.11877	0.10472	0.13414	0.11965	0.13687	0.13013	0.13842	0.12476	0.12886	0.14186	0.17754	0.15973	0.16448	0.16221	0.16845	0.16337	0.14096	0.15679	0.14879	0.1778	0.18452	0.18958	0.21154	0
Venezuela		1.5883	1.72323	1.7466	1.6837	1.71362	1.74239	1.88679	1.92305	1.93668	2.06224	2.08687	2.21113	2.2178	2.06923	2.43677	2.46985	2.57638	2.66169	2.85389	2.647	2.76891	3.03054	2.93435	2.72196	2.93675	2.91656	3.15857	3.06615	3.22512	3.03864	3.32096	0
Virgin Islands, U.S.		0.24982	0.22395	0.16259	0.1143	0.13365	0.1496	0.09966	0.11733	0.08209	0.12507	0.11595	0.11875	0.12131	0.08506	0.12289	0.12184	0.12054	0.12303	0.12754	0.30632	0.13864	0.19195	0.19075	0.22458	0.23458	0.22889	0.23891	0.21603	0.22305	0.2232	0.22814	0
Virgin Islands, British		0.00032	0.00051	0.00051	0.00051	0.00047	0.00048	0.00053	0.00062	0.00066	0.0007	0.0007	0.0007	0.00075	0.00075	0.00075	0.00075	0.00084	0.00084	0.00084	0.00084	0.00084	0.00084	0.00084	0.00097	0.00123	0.00132	0.00141	0.00153	0.0016	0.00157	0.00157	0
Albania		0.15475	0.15461	0.15416	0.15878	0.16072	0.16086	0.15769	0.1573	0.16167	0.1503	0.10797	0.09283	0.08337	0.05894	0.0692	0.07627	0.08487	0.07729	0.08352	0.09466	0.09619	0.0916	0.09516	0.11449	0.11651	0.12092	0.11852	0.10319	0.10963	0.11511	0.12509	0
Austria		1.09577	1.08623	1.03457	1.04021	1.06518	1.08788	1.08336	1.03252	1.11489	1.13012	1.16472	1.22261	1.2003	1.24066	1.23269	1.28864	1.33825	1.35389	1.37968	1.38403	1.38594	1.43983	1.45087	1.4705	1.50963	1.55066	1.53621	1.5442	1.53367	1.47479	1.52707	1.46997
Belgium		2.06423	2.05095	1.93514	1.84186	1.90722	2.00146	2.0658	2.10008	2.09054	2.15121	2.18895	2.27438	2.23941	2.24185	2.37609	2.43884	2.58689	2.64582	2.69823	2.65509	2.7338	2.70258	2.6794	2.78228	2.80785	2.77869	2.7376	2.73626	2.91486	2.65429	2.74807	2.69109
Bosnia and Herzegovi0		0	0	0	0	0	0	0	0	0	0	0	0	0.2585	0.19454	0.10419	0.17611	0.11437	0.15959	0.18607	0.19127	0.22358	0.22112	0.2316	0.22736	0.25338	0.27251	0.27846	0.25997	0.29093	0.30239	0.32508	0
Bulgaria		1.32139	1.31357	1.35888	1.37968	1.39121	1.42884	1.41493	1.40928	1.40933	1.31732	1.18045	0.91293	0.90167	0.80713	0.84447	0.92138	0.94847	0.91626	0.84782	0.77174	0.86773	0.90406	0.8746	0.88654	0.87492	0.91869	0.94058	0.84127	0.81712	0.72108	0.76948	0
Croatia		0	0	0	0	0	0	0	0	0	0	0	0	0.31231	0.30039	0.33778	0.34423	0.34821	0.35472	0.37228	0.37461	0.3756	0.38411	0.37378	0.39311	0.40806	0.404	0.41504	0.3948	0.40653	0.38864	0.39557	0
Cyprus		0.04202	0.03622	0.03868	0.04296	0.04405	0.04677	0.04851	0.05427	0.05423	0.06548	0.06967	0.07014	0.08134	0.07297	0.09299	0.09256	0.09056	0.09221	0.09985	0.10526	0.10312	0.1125	0.11064	0.11157	0.11762	0.11984	0.12625	0.12657	0.13154	0.12457	0.12146	0
Czech Republic		0	0	0	0	0	0	0	0	0	0	0	0	0	1.60239	1.5408	1.565	1.65351	1.4628	1.42265	1.33374	1.40621	1.45203	1.45139	1.51756	1.51531	1.55617	1.58825	1.64613	1.61534	1.53063	1.59118	1.57418
Denmark		0.86306	0.74856	0.73866	0.69914	0.71871	0.814	0.81503	0.83236	0.80544	0.75262	0.76934	0.84526	0.79464	0.84161	0.8776	0.88374	0.97945	0.94273	0.9219	0.89472	0.87642	0.88917	0.8576	0.89932	0.86591	0.84618	0.90184	0.88542	0.84197	0.79435	0.83053	0.78282
Faroe Islands		0.00663	0.00051	0.00051	0.00052	0.00051	0.00051	0.00764	0.00801	0.00848	0.0093	0.00995	0.0092	0.00927	0.00892	0.00933	0.00977	0.00994	0.01003	0.01009	0.01002	0.01022	0.01022	0.01049	0.0105	0.01068	0.01086	0.01172	0.0113	0.01139	0.01133	0.0109	0
Finland		0.97218	0.98988	0.90641	0.90382	0.94532	0.95667	0.98873	1.06452	1.06046	1.0708	1.11584	1.13321	1.13548	1.14658	1.1855	1.13069	1.1434	1.1787	1.22525	1.21317	1.21661	1.22831	1.24334	1.31717	1.3526	1.26539	1.32564	1.35083	1.29482	1.20685	1.30311	1.22339
Former Czechoslovakia		2.74465	2.72524	2.71119	2.73763	2.78659	2.84158	2.92215	2.98367	2.89939	2.92971	2.90599	2.56488	2.38451	0	0	0	0	0	0	0	0	0	0	0	0	0	0	0	0	0	0	0
Former Serbia and Montenegro		0	0	0	0	0	0	0	0	0	0	0	0	0.6656	0.52887	0.55562	0.47592	0.74418	0.75552	0.78056	0.62643	0.6587	0.70203	0.77788	0.78073	0.79528	0.76979	0	0	0	0	0	0
Former Yugoslavia		1.66547	1.74257	1.78375	1.82429	2.12645	2.19666	2.20724	2.22166	2.22773	2.23046	2.13426	1.90296	0	0	0	0	0	0	0	0	0	0	0	0	0	0	0	0	0	0	0	0
France		8.38888	8.06714	7.7905	7.91184	8.17075	8.34985	8.48675	8.61137	8.59016	8.87517	9.12628	9.739	9.91544	9.80301	9.78224	10.0532	10.53032	10.36364	10.5916	10.71685	10.95781	11.09223	11.00065	11.12078	11.40251	11.35578	11.3806	11.29532	11.29373	10.73373	11.02554	10.78072
Germany		0	0	0	0	0	0	0	0	0	0	0	14.30271	14.0417	14.07585	14.01695	14.38832	14.4	14.34602	14.33425	14.11612	14.41007	14.76009	14.44915	14.70252	14.81923	14.42205	14.68168	14.22641	14.39583	13.52424	13.93671	13.08189
Germany, East		3.59379	3.56468	3.60263	3.5452	3.60512	3.80455	3.8116	3.82739	3.81678	3.71624	3.39701	0	0	0	0	0	0	0	0	0	0	0	0	0	0	0	0	0	0	0	0	0
Germany, West		11.27028	10.76921	10.49559	10.49458	10.80876	11.02438	11.40743	11.40608	11.47327	11.1784	11.45957	0	0	0	0	0	0	0	0	0	0	0	0	0	0	0	0	0	0	0	0	0
Gibraltar		0.00738	0.00827	0.00736	0.00581	0.0054	0.01246	0.01868	0.01898	0.02451	0.02104	0.02185	0.02252	0.03988	0.04068	0.04172	0.04181	0.04186	0.04181	0.04825	0.04203	0.09355	0.05126	0.05216	0.0535	0.05489	0.05644	0.05775	0.05952	0.06104	0.06265	0.06368	0
Greece		0.75171	0.74718	0.72815	0.74775	0.76766	0.80896	0.83651	0.89817	0.9576	1.00161	1.03846	1.05581	1.02027	1.07296	1.08683	1.12394	1.14511	1.19909	1.27422	1.26643	1.338	1.35539	1.35968	1.43748	1.42721	1.44302	1.4855	1.50936	1.47097	1.40269	1.3418	1.29289
Hungary		1.20988	1.20101	1.19572	1.20769	1.18705	1.23217	1.24261	1.27868	1.24846	1.24638	1.18139	1.13205	1.05496	1.02682	1.02824	1.03449	1.06992	1.0458	1.05257	1.05058	1.02243	1.05724	1.06097	1.08511	1.08542	1.15794	1.14796	1.12415	1.10717	1.03658	1.05124	0
Iceland		0.05649	0.05619	0.05982	0.06287	0.06693	0.06615	0.06864	0.07091	0.07335	0.07658	0.07833	0.07622	0.07781	0.08151	0.08296	0.08444	0.09067	0.09451	0.10388	0.11282	0.1199	0.12267	0.12659	0.12829	0.12972	0.1306	0.14327	0.16695	0.20929	0.2039	0.20542	0
Ireland		0.32304	0.31186	0.30854	0.29988	0.30755	0.31388	0.3391	0.33993	0.334	0.34706	0.36766	0.38463	0.39173	0.40324	0.42272	0.43221	0.4589	0.48859	0.53077	0.56486	0.60027	0.62845	0.62447	0.61908	0.64429	0.66413	0.70269	0.70299	0.69324	0.62099	0.62811	0.59332
Italy		6.11717	6.00108	5.85958	5.75121	6.01082	6.02781	6.1078	6.331	6.48621	6.67551	6.72365	6.87508	6.83769	6.82577	6.73242	7.04419	7.0722	7.17685	7.38134	7.50781	7.58182	7.62301	7.65325	7.90469	8.16668	8.07918	8.00936	8.03926	7.83857	7.35131	7.62586	7.40538
Luxembourg		0.14196	0.12669	0.12047	0.11458	0.1236	0.12541	0.125	0.12441	0.12894	0.13885	0.14474	0.15658	0.15566	0.16262	0.1567	0.13923	0.14186	0.14123	0.13841	0.14602	0.15384	0.16143	0.16988	0.17893	0.19745	0.20597	0.20346	0.1993	0.19594	0.18552	0.19874	0.19426
Macedonia		0	0	0	0	0	0	0	0	0	0	0	0	0.11972	0.12041	0.11189	0.11526	0.12501	0.12249	0.13989	0.12905	0.11505	0.10637	0.1066	0.1156	0.11805	0.11917	0.11709	0.11407	0.11367	0.1128	0.12055	0
Malta		0.01888	0.02056	0.02211	0.01587	0.02247	0.01833	0.021	0.02361	0.02654	0.02898	0.03049	0.03103	0.03098	0.03471	0.03589	0.03366	0.03497	0.03735	0.03905	0.04454	0.03919	0.0329	0.03939	0.03925	0.03973	0.04122	0.03904	0.04138	0.04255	0.08783	0.10438	0
Montenegro		0	0	0	0	0	0	0	0	0	0	0	0	0	0	0	0	0	0	0	0	0	0	0	0	0	0	0.04016	0.03602	0.04311	0.03953	0.04752	0
Netherlands		3.20502	3.00721	2.87289	2.81453	2.88156	3.00962	3.14291	3.23155	3.24036	3.25926	3.31155	3.49597	3.46819	3.53956	3.50861	3.57411	3.73196	3.69864	3.69078	3.68216	3.79343	3.92944	3.93986	4.02199	4.13271	4.23416	4.14183	4.35459	4.14045	4.07681	4.2662	4.07899
Norway		1.34103	1.38834	1.34656	1.47001	1.53129	1.54751	1.54194	1.57291	1.60034	1.67164	1.71032	1.61945	1.71221	1.71023	1.68012	1.78719	1.68984	1.74909	1.80677	1.88487	1.98845	1.89297	1.94002	1.82	1.92523	2.0028	1.84424	1.97706	1.94232	1.89931	1.86836	1.86774
Poland		5.06796	4.57704	4.58383	4.59384	4.75503	4.91312	5.00005	5.16208	5.0579	4.86104	3.95022	3.87079	3.83475	3.96796	3.81655	3.70105	4.14003	4.08498	3.8487	3.97659	3.62445	3.45492	3.45339	3.57188	3.74765	3.67445	3.85182	3.91829	3.89067	3.78329	4.05529	4.09296
Portugal		0.43149	0.36906	0.48664	0.50029	0.52866	0.53583	0.56926	0.5882	0.65129	0.70028	0.74771	0.74822	0.75685	0.76917	0.80845	0.84072	0.87647	0.91333	0.97411	1.02381	1.07048	1.08598	1.08306	1.11732	1.11244	1.12608	1.1019	1.12765	1.06227	1.0649	1.12574	1.074
Romania		2.75196	2.7643	2.88751	2.94744	2.87816	2.88837	2.96275	3.03482	2.99265	3.10534	2.81496	2.20882	2.05098	1.86929	1.86797	2.01514	2.05075	2.02501	1.73668	1.59261	1.58611	1.71549	1.68366	1.63078	1.68956	1.6655	1.67453	1.66212	1.64164	1.41096	1.42516	0
Serbia		0	0	0	0	0	0	0	0	0	0	0	0	0	0	0	0	0	0	0	0	0	0	0	0	0	0	0.77822	0.76824	0.74762	0.74543	0.77456	0
Slovakia		0	0	0	0	0	0	0	0	0	0	0	0	0	0.77884	0.7458	0.80378	0.78591	0.77533	0.77298	0.76946	0.78498	0.82957	0.84408	0.82019	0.80533	0.83036	0.81948	0.79151	0.80208	0.72467	0.77205	0.73283
Slovenia		0	0	0	0	0	0	0	0	0	0	0	0	0.22947	0.23469	0.24616	0.27732	0.30619	0.29136	0.29111	0.29421	0.29282	0.29895	0.30204	0.30098	0.31417	0.3193	0.31761	0.31862	0.33989	0.30802	0.30953	0.30403
Spain		3.04408	3.09005	3.33173	3.41925	3.25094	3.33717	3.39223	3.49437	3.74424	3.85778	3.92295	4.14693	4.11966	4.02096	4.18134	4.31443	4.40675	4.6969	4.92156	5.1666	5.54154	5.78945	5.83067	6.13748	6.34354	6.44556	6.4938	6.76091	6.52779	6.10063	6.23946	6.0968
Sweden		2.0745	2.04197	1.88243	1.93752	2.03011	2.16753	2.19951	2.26714	2.23013	2.19853	2.21898	2.21453	2.24492	2.24428	2.25953	2.30952	2.27326	2.31767	2.40288	2.36802	2.27081	2.40492	2.27707	2.16972	2.30924	2.33275	2.21398	2.28591	2.22166	2.05075	2.22204	2.14353
Switzerland		1.13929	1.05743	1.03484	1.08662	1.06238	1.15513	1.16494	1.16849	1.18795	1.1524	1.18118	1.22301	1.23497	1.22616	1.24585	1.23972	1.21469	1.23543	1.26465	1.32588	1.29678	1.35071	1.28496	1.30302	1.31289	1.26341	1.28603	1.3027	1.31995	1.2873	1.26518	1.25502
Turkey		1.04087	0.97646	1.12445	1.16247	1.22581	1.33405	1.49782	1.65551	1.70408	1.80295	1.97311	2.06439	2.12734	2.32763	2.22973	2.48993	2.74792	2.92616	2.99442	2.90565	3.16279	2.89384	3.14597	3.31735	3.51199	3.73432	4.07083	4.4552	4.29029	4.29655	4.48981	4.95162
United Kingdom		8.84074	8.51623	8.37158	8.40572	8.45009	8.73387	8.90013	9.04893	9.05235	9.29279	9.27058	9.51965	9.27266	9.56983	9.53401	9.4535	10.0481	9.75484	9.74074	9.79273	9.72914	9.88082	9.93318	9.97834	10.02772	9.84463	9.72876	9.56105	9.28664	8.78475	8.91401	8.51752
Armenia		0	0	0	0	0	0	0	0	0	0	0	0	0.19984	0.14554	0.13423	0.13419	0.16968	0.14562	0.15267	0.15564	0.16247	0.1646	0.16393	0.17541	0.18063	0.20159	0.2038	0.22112	0.21598	0.20127	0.21196	0
Azerbaijan		0	0	0	0	0	0	0	0	0	0	0	0	0.9918	0.76598	0.76195	0.73143	0.64552	0.63778	0.5443	0.56342	0.52002	0.52053	0.59178	0.60157	0.63699	0.65892	0.69878	0.59244	0.71848	0.56673	0.55567	0
Belarus		0	0	0	0	0	0	0	0	0	0	0	0	1.52941	1.24347	1.07594	1.00994	1.00954	0.99603	0.97627	0.98677	1.05214	0.96268	0.90747	0.98457	0.95177	1.12403	1.15433	1.15134	1.12029	1.05118	1.13123	0
Estonia		0	0	0	0	0	0	0	0	0	0	0	0	0.29165	0.18966	0.18979	0.1756	0.22544	0.21632	0.23121	0.19226	0.19633	0.2039	0.2034	0.22366	0.23265	0.23315	0.22655	0.23105	0.22402	0.19773	0.22299	0.23283
Former U.S.S.R.		46.73513	47.22093	49.26201	50.41837	53.41549	55.68861	57.47549	58.82369	60.75979	60.06916	60.97528	57.60298	0	0	0	0	0	0	0	0	0	0	0	0	0	0	0	0	0	0	0	0
Georgia		0	0	0	0	0	0	0	0	0	0	0	0	0.32759	0.19109	0.1548	0.15086	0.15873	0.16348	0.16531	0.14406	0.13752	0.12619	0.14833	0.13288	0.1357	0.15153	0.13936	0.16648	0.1737	0.17753	0.19191	0
Kazakhstan		0	0	0	0	0	0	0	0	0	0	0	0	3.42894	2.85513	2.29445	1.90435	1.96301	1.68726	1.62533	1.79159	1.83351	1.93523	1.99277	1.82516	2.18332	2.23411	2.37702	2.38347	2.36741	2.14318	2.25517	0
Kyrgyzstan		0	0	0	0	0	0	0	0	0	0	0	0	0.29244	0.24353	0.2343	0.19044	0.22943	0.21813	0.21854	0.23592	0.24136	0.22777	0.19289	0.20385	0.21189	0.21021	0.21543	0.20304	0.17757	0.20701	0.20166	0
Latvia		0	0	0	0	0	0	0	0	0	0	0	0	0.22314	0.16423	0.16171	0.17263	0.17215	0.16175	0.16027	0.14799	0.15412	0.16092	0.154	0.16071	0.17574	0.18543	0.18448	0.17261	0.16337	0.16488	0.16082	0
Lithuania		0	0	0	0	0	0	0	0	0	0	0	0	0.47702	0.37634	0.35493	0.37862	0.3609	0.35896	0.39095	0.30442	0.2973	0.31679	0.34054	0.35264	0.35316	0.35257	0.35277	0.38586	0.37472	0.32429	0.26217	0
Moldova		0	0	0	0	0	0	0	0	0	0	0	0	0.28316	0.20184	0.15647	0.1392	0.15137	0.15359	0.13853	0.11022	0.11014	0.10728	0.11896	0.1305	0.12268	0.1293	0.13827	0.12851	0.13351	0.11866	0.1186	0
Russia		0	0	0	0	0	0	0	0	0	0	0	0	34.11636	30.58451	29.22575	27.9412	25.9227	24.39344	24.26904	25.33501	26.13934	25.70645	26.66264	27.4133	28.14579	27.92219	27.68692	28.69019	29.63247	27.68958	29.32178	32.77096
Tajikistan		0	0	0	0	0	0	0	0	0	0	0	0	0.28994	0.25421	0.25274	0.20849	0.22971	0.21884	0.2264	0.24174	0.23909	0.24705	0.25201	0.27054	0.27419	0.28425	0.28025	0.27243	0.25661	0.18682	0.19051	0
Turkmenistan		0	0	0	0	0	0	0	0	0	0	0	0	0.31126	0.27038	0.28682	0.30405	0.29793	0.30586	0.28061	0.31785	0.40112	0.50227	0.58452	0.75923	0.80707	0.83243	0.84142	0.89993	0.93194	0.88651	0.92312	0
Ukraine		0	0	0	0	0	0	0	0	0	0	0	0	8.57337	8.08747	7.00352	6.91332	6.33645	6.06835	5.85075	5.75359	5.75077	5.64106	5.82163	6.2826	6.25436	6.32588	5.86877	6.29988	6.22468	4.45821	5.09354	0
Uzbekistan		0	0	0	0	0	0	0	0	0	0	0	0	1.66187	2.03098	1.74539	1.8688	1.8794	1.87558	1.84477	1.86382	1.95472	2.04481	2.09616	2.12792	2.25405	2.1614	2.22683	2.22658	2.34739	1.99839	1.99535	0
Bahrain		0.13752	0.15787	0.16794	0.17792	0.17157	0.20492	0.22078	0.26522	0.22898	0.23439	0.25635	0.28713	0.24078	0.27663	0.28338	0.28363	0.28439	0.33517	0.35172	0.35646	0.36474	0.37722	0.39762	0.40773	0.41884	0.44726	0.48868	0.51317	0.53474	0.54327	0.55759	0
Iran		1.58261	1.48862	1.70731	2.09302	2.22534	2.39652	2.42887	2.54105	2.70365	2.98498	3.10319	3.23565	3.35666	3.23408	3.68642	3.82582	3.96101	4.43353	4.58254	4.84077	5.02081	5.38611	5.88847	6.1875	6.40678	7.33526	7.67976	7.89703	8.09856	9.04268	9.10777	0
Iraq		0.52402	0.48294	0.4624	0.55081	0.53817	0.56653	0.62292	0.63925	0.76751	0.82522	0.91771	0.6001	0.83887	0.84464	1.10244	1.13058	1.12469	1.04127	1.05605	1.07373	1.08419	1.13411	1.14428	1.0122	1.12508	1.23888	1.22646	1.30916	1.34034	1.45744	1.50018	0
Israel		0.35096	0.36699	0.37468	0.36977	0.3814	0.35678	0.37165	0.39237	0.42507	0.44373	0.45182	0.47963	0.54028	0.53244	0.61975	0.62197	0.66144	0.71418	0.7261	0.73572	0.81131	0.87409	0.84092	0.85309	0.8555	0.87197	0.88416	0.91127	0.83252	0.87707	0.94537	0.97415
Jordan		0.07704	0.09157	0.10455	0.11201	0.11582	0.12027	0.12935	0.14108	0.13173	0.13508	0.14553	0.1376	0.16057	0.14067	0.1836	0.1931	0.20535	0.19888	0.21528	0.21447	0.22545	0.2202	0.23062	0.25148	0.27821	0.29423	0.30837	0.30975	0.30782	0.31309	0.32667	0
Kuwait		0.48089	0.35214	0.35013	0.3885	0.4067	0.40268	0.45144	0.53896	0.61897	0.6963	0.44637	0.21583	0.3488	0.41377	0.57307	0.59178	0.74935	0.798	0.84566	0.86067	0.90963	0.88264	0.88761	0.96046	1.00698	1.14679	1.13313	1.12475	1.16169	1.21498	1.28347	0
Lebanon		0.10473	0.09745	0.09447	0.09773	0.09399	0.10834	0.10323	0.10697	0.09781	0.07744	0.07142	0.11807	0.11896	0.14042	0.17031	0.18276	0.19219	0.21977	0.22429	0.23013	0.23433	0.22499	0.22859	0.23803	0.22844	0.21854	0.19424	0.17922	0.18233	0.28324	0.27604	0
Oman		0.06467	0.06873	0.08358	0.09677	0.10035	0.11874	0.13477	0.13861	0.13042	0.16839	0.18358	0.20997	0.20445	0.22356	0.23685	0.22439	0.23107	0.26757	0.34683	0.30098	0.34089	0.34692	0.36024	0.3566	0.38096	0.48045	0.55125	0.58188	0.68767	0.75002	0.86701	0
Palestine		0	0	0	0	0	0	0	0	0	0	0	0	0	0	0	0	0	0.00957	0.01476	0.01499	0.01978	0.0266	0.02469	0.02643	0.04029	0.04934	0.05351	0.05453	0.05852	0.04525	0.04585	0
Qatar		0.2143	0.202	0.23742	0.22323	0.26846	0.24321	0.25573	0.26227	0.26799	0.27809	0.34252	0.39711	0.47494	0.53468	0.55856	0.5629	0.57852	0.61006	0.62262	0.5938	0.64476	0.5025	0.5271	0.58437	0.70528	0.88637	0.95057	0.99146	1.01462	1.08657	1.10456	0
Saudi Arabia		1.66331	2.02483	1.96743	2.12312	2.46675	2.71018	3.01461	3.07255	3.18356	3.12648	3.3474	3.49904	3.6636	2.90916	3.90046	3.82572	4.10441	4.3656	4.54323	4.60224	4.85276	5.1387	5.38353	5.76125	6.20771	6.52548	6.8456	6.18472	7.45005	7.22524	7.84894	8.75755
Syria		0.27405	0.28914	0.29523	0.33399	0.36831	0.38492	0.38388	0.43466	0.45274	0.48254	0.56278	0.52102	0.53779	0.5452	0.63357	0.60911	0.65218	0.69498	0.7525	0.77364	0.78206	0.76222	0.8197	0.82694	0.84518	0.80437	0.80649	0.80705	0.81778	0.9479	1.03228	0
United Arab Emirates		0.26731	0.43622	0.41384	0.5109	0.58179	0.79708	0.90726	1.07115	1.17287	1.2686	1.22933	1.49165	1.61408	1.46204	1.49157	1.60656	1.66878	1.77107	1.83821	1.86471	1.8663	1.89112	2.05573	2.1047	2.21903	2.31365	2.53901	2.82421	3.29263	3.37142	3.53612	0
Yemen		0.09609	0.09778	0.11456	0.10413	0.13211	0.14669	0.14115	0.14022	0.14387	0.15439	0.16025	0.16598	0.17264	0.12871	0.13769	0.14988	0.15258	0.15864	0.17072	0.17888	0.19367	0.20573	0.22587	0.24444	0.2463	0.25679	0.28046	0.25545	0.31997	0.28928	0.30183	0
Algeria		0.80085	0.68005	0.9578	1.07399	1.15572	1.04784	1.0604	1.1349	1.20786	1.17025	1.2169	1.35505	1.29959	1.08345	1.23763	1.30333	1.26434	1.2026	1.25334	1.25165	1.23857	1.25615	1.27659	1.2927	1.26393	1.48134	1.54318	1.61954	1.72123	1.7988	1.79829	0
Angola		0.05816	0.05805	0.0618	0.06667	0.05992	0.07307	0.07392	0.07532	0.07828	0.07641	0.07983	0.08283	0.08553	0.08089	0.08235	0.0876	0.08436	0.09326	0.08492	0.09419	0.09094	0.1193	0.12741	0.13525	0.14463	0.14764	0.1659	0.1862	0.19718	0.20883	0.23924	0
Benin		0.00659	0.00662	0.00469	0.00686	0.00669	0.00787	0.00764	0.00598	0.00716	0.00768	0.00889	0.01017	0.01141	0.01244	0.01308	0.01428	0.01534	0.01668	0.01787	0.01954	0.02426	0.02449	0.02594	0.03053	0.03556	0.03725	0.04391	0.04767	0.05046	0.06582	0.07364	0
Botswa0		0.01518	0.01542	0.01436	0.014	0.01442	0.01906	0.02021	0.02299	0.02467	0.0282	0.03297	0.0342	0.03907	0.0369	0.03956	0.04291	0.03967	0.04159	0.04732	0.04831	0.05755	0.05139	0.05201	0.05007	0.05715	0.06134	0.06223	0.06069	0.06339	0.06514	0.0743	0
Burki0 Faso		0.00613	0.00617	0.00618	0.00621	0.00621	0.00591	0.00692	0.00722	0.00738	0.0066	0.00705	0.00812	0.00821	0.00866	0.01017	0.0104	0.01089	0.01705	0.01562	0.01608	0.01662	0.01662	0.01729	0.01803	0.01832	0.01877	0.01862	0.02082	0.02012	0.02564	0.02599	0
Burundi		0.00159	0.0018	0.00159	0.00202	0.00259	0.00277	0.00281	0.00319	0.00471	0.00505	0.00548	0.00606	0.00577	0.00427	0.00674	0.00658	0.00668	0.00676	0.00671	0.00661	0.00658	0.00712	0.00727	0.00729	0.00667	0.00664	0.00644	0.00615	0.00406	0.00439	0.00468	0
Cameroon		0.04713	0.05217	0.06048	0.06024	0.06116	0.06392	0.06991	0.06649	0.06631	0.07724	0.07769	0.07856	0.0788	0.05979	0.07455	0.07634	0.07601	0.08	0.08001	0.07822	0.08132	0.08165	0.07808	0.08387	0.08674	0.08577	0.09881	0.09902	0.10565	0.10857	0.12487	0
Cape Verde		0.00454	0.00453	0.002	0.00196	0.00239	0.00236	0.0008	0.00089	0.00128	0.00137	0.00146	0.0015	0.00159	0.00137	0.00178	0.00174	0.00184	0.00184	0.00185	0.00185	0.00318	0.00214	0.00228	0.00227	0.00433	0.00373	0.0042	0.00493	0.00507	0.00552	0.00552	0
Central African Republic		0.00274	0.00334	0.00358	0.00376	0.00363	0.00358	0.00427	0.0039	0.00412	0.00396	0.00424	0.00441	0.0045	0.00459	0.00484	0.00484	0.00489	0.005	0.00507	0.00507	0.00539	0.00549	0.00565	0.00567	0.00577	0.00565	0.00592	0.00633	0.00647	0.00609	0.00609	0
Chad		0.00407	0.00389	0.00389	0.00389	0.00186	0.00222	0.00399	0.00348	0.00232	0.00238	0.00493	0.00461	0.00464	0.00194	0.00248	0.00247	0.00255	0.00257	0.00257	0.00257	0.00278	0.00284	0.00293	0.00293	0.00272	0.00302	0.00325	0.00379	0.00362	0.00364	0.00364	0
Comoros		0.00063	0.00063	0.00063	0.00063	0.00064	0.00055	0.00055	0.00087	0.00091	0.00092	0.00118	0.00114	0.00114	0.0009	0.00118	0.00118	0.00118	0.00118	0.00123	0.00123	0.00136	0.00141	0.00146	0.00147	0.00151	0.00161	0.00163	0.00204	0.00214	0.00214	0.00186	0
Congo (Brazzaville)		0.01194	0.01421	0.01282	0.01141	0.01205	0.01726	0.01512	0.01842	0.01503	0.01726	0.01927	0.01766	0.01681	0.01302	0.01455	0.01472	0.01546	0.01529	0.01435	0.01184	0.01302	0.016	0.0154	0.01722	0.01848	0.02482	0.02843	0.03386	0.03906	0.04784	0.06727	0
Congo (Kinshasa)		0.09072	0.09277	0.09408	0.09741	0.09554	0.09769	0.10398	0.09915	0.10981	0.11239	0.10628	0.10518	0.11521	0.1074	0.09838	0.10828	0.10937	0.09877	0.09347	0.09292	0.09171	0.08267	0.07982	0.08113	0.09578	0.09882	0.1004	0.10656	0.10331	0.10511	0.11299	0
Cote dIvoire (IvoryCoast)		0.07388	0.08135	0.07638	0.07388	0.06544	0.07711	0.07858	0.08658	0.0905	0.09075	0.07791	0.06585	0.06377	0.06313	0.07474	0.08127	0.10143	0.09546	0.09637	0.12522	0.13277	0.10998	0.10706	0.10877	0.11505	0.11335	0.114	0.11957	0.13064	0.12995	0.12381	0
Djibouti		0.02205	0.0177	0.01779	0.01314	0.01096	0.01082	0.00974	0.00996	0.00973	0.02304	0.02326	0.02353	0.02359	0.02266	0.02427	0.02416	0.02416	0.0245	0.0245	0.0245	0.02465	0.02502	0.02506	0.02559	0.0259	0.02565	0.02374	0.02319	0.01642	0.01667	0.01667	0
Egypt		0.70639	0.82834	0.92715	1.05147	1.15066	1.21268	1.24476	1.29745	1.30184	1.34836	1.43795	1.43262	1.42707	1.37148	1.55635	1.58777	1.72707	1.78967	1.84917	1.92281	2.0052	2.22517	2.25765	2.43298	2.58248	2.68931	2.53821	2.70984	3.1936	3.20306	3.30724	0
Equatorial Guinea		0.00085	0.00084	0.00106	0.00106	0.00106	0.0012	0.00121	0.00116	0.00116	0.00168	0.00173	0.00182	0.00172	0.00181	0.00186	0.00185	0.0019	0.00204	0.00278	0.00278	0.00433	0.00354	0.04942	0.05064	0.0059	0.05036	0.05045	0.0588	0.05765	0.06384	0.06934	0
Eritrea		0	0	0	0	0	0	0	0	0	0	0	0	0	0	0.01373	0.0152	0.01553	0.01574	0.01685	0.01422	0.00888	0.01052	0.00977	0.01103	0.01037	0.01036	0.01035	0.00973	0.01108	0.00714	0.00701	0
Ethiopia		0.03009	0.03056	0.03403	0.03878	0.03855	0.04553	0.04451	0.05018	0.04922	0.05208	0.05321	0.04599	0.06159	0.05553	0.044	0.04756	0.03972	0.04016	0.0521	0.06112	0.06451	0.06956	0.0745	0.08134	0.08518	0.09097	0.10302	0.11177	0.13166	0.13029	0.13678	0
Gabon		0.02842	0.03203	0.03022	0.04146	0.03733	0.03172	0.02869	0.03333	0.0353	0.04399	0.04332	0.0443	0.04559	0.04055	0.04429	0.04181	0.04339	0.04574	0.04426	0.03995	0.03684	0.0382	0.03796	0.03898	0.0393	0.03826	0.04223	0.04342	0.05311	0.04194	0.04543	0
Gambia, The		0.00224	0.00223	0.00223	0.00223	0.00246	0.00242	0.00225	0.0026	0.00269	0.00265	0.00271	0.00282	0.00282	0.00299	0.00331	0.00309	0.00308	0.00309	0.00327	0.00327	0.00365	0.00392	0.00401	0.00406	0.00408	0.00423	0.00453	0.00559	0.00583	0.00623	0.00677	0
Gha0		0.08608	0.08299	0.08261	0.05537	0.05144	0.05842	0.07788	0.08511	0.09327	0.10297	0.10037	0.10433	0.11333	0.10665	0.115	0.11703	0.12352	0.12183	0.09528	0.11604	0.14286	0.1419	0.13071	0.12545	0.14495	0.14937	0.15015	0.13327	0.14904	0.17244	0.19467	0
Guinea		0.01374	0.0135	0.01372	0.01373	0.01406	0.01239	0.016	0.01676	0.01713	0.01665	0.02186	0.01738	0.01777	0.01674	0.0187	0.01865	0.01884	0.01978	0.0201	0.02096	0.02176	0.02345	0.02392	0.02207	0.02363	0.02358	0.02306	0.02344	0.02427	0.02445	0.02447	0
Guinea-Bissau		0.00123	0.00123	0.00125	0.00125	0.00168	0.00181	0.00142	0.00262	0.00293	0.00307	0.00388	0.00397	0.004	0.00343	0.00437	0.00432	0.00436	0.00437	0.00437	0.00437	0.00485	0.0049	0.00508	0.00521	0.00518	0.00538	0.00533	0.00551	0.00541	0.00557	0.00557	0
Kenya		0.09913	0.10191	0.10094	0.10042	0.09909	0.10318	0.10949	0.10052	0.1132	0.12209	0.12431	0.11496	0.12362	0.12181	0.13247	0.13777	0.14337	0.13408	0.14811	0.14138	0.14224	0.14413	0.14934	0.16118	0.16875	0.18298	0.20102	0.2022	0.18836	0.19759	0.21986	0
Lesotho		0.00212	0.00192	0.00212	0.00212	0.00212	0.00219	0.0022	0.0022	0.0015	0.0022	0.00285	0.0029	0.00306	0.00311	0.00352	0.00357	0.0036	0.00355	0.0032	0.00467	0.00588	0.00598	0.00615	0.00635	0.00595	0.00662	0.00531	0.00566	0.00587	0.00552	0.00993	0
Liberia		0.03184	0.02937	0.02955	0.02942	0.02581	0.0262	0.02118	0.01655	0.02054	0.01685	0.00814	0.00476	0.00483	0.0049	0.00533	0.00533	0.00553	0.00559	0.00577	0.00577	0.00616	0.00652	0.00705	0.00727	0.00735	0.00745	0.00858	0.00942	0.00844	0.00775	0.00753	0
Libya		0.39743	0.3575	0.3539	0.38078	0.38419	0.42109	0.44198	0.45225	0.46429	0.48088	0.51011	0.53234	0.49646	0.44235	0.53086	0.55334	0.58466	0.61762	0.59319	0.55764	0.62988	0.66709	0.69699	0.68428	0.75794	0.77201	0.73147	0.75824	0.73771	0.77865	0.83996	0
Madagascar		0.01891	0.01648	0.0152	0.01936	0.01928	0.02096	0.01523	0.02076	0.02275	0.01724	0.01698	0.01744	0.01853	0.01785	0.0209	0.02168	0.02227	0.02273	0.02332	0.02339	0.03093	0.03335	0.03755	0.03941	0.04278	0.04156	0.04108	0.04182	0.04563	0.03285	0.03292	0
Malawi		0.01192	0.01244	0.01174	0.01072	0.01064	0.01132	0.01148	0.01196	0.01164	0.01306	0.0149	0.01725	0.01741	0.0165	0.01847	0.01906	0.01936	0.01949	0.02077	0.02152	0.02275	0.02291	0.02391	0.0244	0.02697	0.02836	0.02907	0.02984	0.03121	0.02984	0.03061	0
Mali		0.00704	0.00907	0.00726	0.00741	0.00754	0.00814	0.00675	0.00767	0.00482	0.00835	0.00844	0.00868	0.00904	0.0093	0.00953	0.00956	0.00958	0.00988	0.01	0.01001	0.01023	0.01029	0.01102	0.0111	0.01144	0.0125	0.01163	0.01188	0.01213	0.01239	0.01256	0
Mauritania		0.0092	0.00898	0.00909	0.00904	0.01316	0.01301	0.00741	0.01022	0.01311	0.01524	0.01356	0.0143	0.04602	0.03934	0.04727	0.04792	0.04817	0.04856	0.04874	0.04874	0.04976	0.04976	0.04748	0.04879	0.04151	0.04908	0.04206	0.03878	0.0438	0.02784	0.0279	0
Mauritius		0.01366	0.01206	0.012	0.01287	0.01342	0.01444	0.01754	0.0155	0.0212	0.0251	0.02774	0.02774	0.03286	0.03086	0.03249	0.03554	0.03538	0.03581	0.03691	0.04068	0.05334	0.05851	0.05433	0.0567	0.05767	0.06037	0.06368	0.06784	0.06984	0.06384	0.0668	0
Morocco		0.22621	0.21636	0.2182	0.22408	0.20998	0.22413	0.25189	0.25296	0.26609	0.29726	0.30899	0.31944	0.32663	0.30248	0.39049	0.37388	0.39885	0.40594	0.41548	0.43711	0.44701	0.4813	0.48821	0.49124	0.4923	0.49773	0.51652	0.52846	0.59814	0.64331	0.67296	0
Mozambique		0.17546	0.06689	0.06445	0.08622	0.03419	0.03311	0.01812	0.01736	0.02463	0.02016	0.02036	0.02085	0.02042	0.02184	0.02133	0.02241	0.02159	0.02587	0.03217	0.07782	0.10073	0.13093	0.13324	0.13221	0.14246	0.15798	0.17698	0.18214	0.16984	0.18321	0.18078	0
0mibia		0	0	0	0	0	0	0	0	0	0	0.03435	0.01809	0.01694	0.01796	0.0203	0.03191	0.03087	0.03002	0.03332	0.03856	0.0415	0.04742	0.0503	0.05393	0.0569	0.05861	0.0626	0.06488	0.0726	0.06967	0.06538	0
Niger		0.00915	0.00951	0.00999	0.01031	0.01085	0.01088	0.00918	0.01015	0.01359	0.01419	0.01457	0.01466	0.01486	0.015	0.0154	0.01536	0.01526	0.01508	0.01515	0.01495	0.01511	0.0155	0.01645	0.01691	0.0182	0.01724	0.0169	0.01752	0.01309	0.01809	0.01834	0
Nigeria		0.42228	0.51801	0.51696	0.51838	0.55649	0.59952	0.58736	0.61963	0.66323	0.71807	0.69886	0.7694	0.78635	0.74862	0.7432	0.83268	0.8494	0.85069	0.81581	0.81752	0.80941	0.91104	0.93475	0.97853	0.98351	1.08137	1.02946	0.98637	1.0381	0.67651	0.72951	0
Reunion		0.01195	0.01261	0.01375	0.01546	0.01624	0.01672	0.01671	0.01822	0.01952	0.02169	0.02318	0.02508	0.02604	0.02653	0.03262	0.03241	0.0335	0.03404	0.04271	0.04275	0.04413	0.04593	0.04587	0.04595	0.04641	0.04728	0.0478	0.04898	0.05047	0.05208	0.05203	0
Rwanda		0.00354	0.00645	0.00646	0.00729	0.01097	0.01128	0.01098	0.0113	0.01132	0.01174	0.01199	0.01214	0.01245	0.00873	0.01151	0.01169	0.01151	0.01186	0.01221	0.01184	0.01234	0.01233	0.01248	0.01278	0.01204	0.01248	0.01237	0.01108	0.0113	0.01213	0.01219	0
Saint Hele0		0	0.00004	0.00004	0.00004	0.00004	0.00004	0.00004	0.00009	0.00009	0.00009	0.00009	0.00004	0.00004	0.00009	0.00009	0.00009	0.00009	0.00009	0.00009	0.00009	0.00031	0.00018	0.00018	0.00018	0.00013	0.00018	0.00016	0.00018	0.00014	0.00013	0.00013	0
Sao Tome and Principe		0.00054	0.00054	0.00055	0.00053	0.00055	0.00057	0.00056	0.00057	0.00057	0.00057	0.00105	0.0011	0.00114	0.00109	0.00119	0.00119	0.00118	0.00119	0.00118	0.0012	0.00138	0.00132	0.00139	0.0014	0.00138	0.00141	0.00158	0.00194	0.00196	0.00196	0.00195	0
Senegal		0.03698	0.03586	0.03666	0.03503	0.04167	0.04088	0.04037	0.04066	0.03474	0.03616	0.03623	0.03353	0.04079	0.03462	0.05136	0.05531	0.05551	0.05104	0.05428	0.05974	0.06366	0.06364	0.06656	0.0685	0.07829	0.08372	0.0858	0.08716	0.08835	0.08611	0.08664	0
Seychelles		0.00316	0.00253	0.00234	0.00405	0.00426	0.00437	0.00438	0.00467	0.00647	0.00686	0.0063	0.00678	0.00697	0.0071	0.00725	0.00729	0.00727	0.00782	0.00782	0.00782	0.0081	0.00835	0.01215	0.01185	0.01228	0.01209	0.016	0.01338	0.01472	0.01593	0.01342	0
Sierra Leone		0.01057	0.01063	0.01141	0.01076	0.01071	0.01167	0.01259	0.01352	0.01472	0.01469	0.01482	0.01553	0.01135	0.00935	0.01052	0.01216	0.01213	0.01243	0.01247	0.01247	0.01335	0.01366	0.01389	0.01421	0.01682	0.01674	0.01659	0.01786	0.02122	0.01985	0.02034	0
Somalia		0.01656	0.01929	0.01893	0.0185	0.0192	0.01888	0.02008	0.0149	0.01508	0.01535	0.01402	0.00835	0.00776	0.00767	0.00803	0.00803	0.00803	0.00803	0.00803	0.00803	0.00998	0.00998	0.00998	0.01009	0.00996	0.0101	0.01059	0.01194	0.01138	0.01125	0.01125	0
South Africa		2.72828	2.95592	3.15803	3.18719	3.4528	3.51604	3.61766	3.66845	3.78098	3.55047	3.52342	3.67624	3.76193	3.67461	4.08411	4.10982	4.16526	4.55692	4.34929	4.46324	4.58373	4.64708	4.53578	4.87605	5.21505	5.12043	5.28755	5.41603	5.72952	5.62826	5.59303	0
Sudan and South Sudan		0.05224	0.05595	0.06067	0.05867	0.05436	0.06154	0.06886	0.06705	0.07187	0.06886	0.06892	0.09321	0.08713	0.07537	0.07559	0.07125	0.07188	0.07335	0.07365	0.07956	0.10796	0.13557	0.13991	0.1539	0.1649	0.17682	0.19666	0.19178	0.2123	0.29356	0.30792	0
Swaziland		0.01009	0.00962	0.00926	0.00736	0.00863	0.01076	0.01038	0.01143	0.01206	0.01258	0.01225	0.01219	0.0122	0.01112	0.01575	0.01567	0.01456	0.01122	0.01122	0.01677	0.01637	0.0165	0.0166	0.01529	0.01457	0.01435	0.01595	0.01813	0.01825	0.0174	0.01729	0
Tanzania		0.03903	0.04366	0.04296	0.03983	0.04243	0.04312	0.04934	0.04561	0.04835	0.04975	0.0545	0.04977	0.05194	0.05324	0.04931	0.04887	0.05138	0.04795	0.05498	0.0582	0.0582	0.06861	0.07525	0.07626	0.08168	0.0904	0.09356	0.10957	0.11714	0.12382	0.12017	0
Togo		0.00961	0.00903	0.00899	0.00932	0.01099	0.01074	0.00911	0.00872	0.00909	0.01039	0.01032	0.01682	0.01229	0.01038	0.01126	0.01229	0.01183	0.01119	0.01226	0.01739	0.02191	0.01588	0.02058	0.03206	0.03397	0.03354	0.03483	0.03759	0.04271	0.02184	0.02309	0
Tunisia		0.12811	0.14107	0.13426	0.1532	0.16706	0.17057	0.18062	0.16845	0.17914	0.20375	0.20195	0.1976	0.19069	0.19936	0.2375	0.21225	0.23096	0.26778	0.28711	0.28948	0.30098	0.33625	0.33847	0.33078	0.33365	0.35827	0.33345	0.29423	0.3135	0.30028	0.30913	0
Uganda		0.01594	0.01135	0.01296	0.01232	0.01351	0.01423	0.01522	0.01369	0.01772	0.01779	0.01941	0.0209	0.02324	0.02214	0.02433	0.02472	0.02541	0.02708	0.02918	0.02925	0.03282	0.03501	0.0365	0.03925	0.04059	0.04166	0.03901	0.04344	0.04429	0.05992	0.0625	0
Western Sahara		0.00236	0.00235	0.00264	0.00256	0.00265	0.0027	0.00271	0.00279	0.00283	0.00283	0.00296	0.00296	0.003	0.00281	0.00292	0.00313	0.00313	0.00313	0.00313	0.00313	0.0036	0.00366	0.00366	0.00366	0.00364	0.00412	0.00365	0.00383	0.00364	0.00365	0.00365	0
Zambia		0.13273	0.13411	0.13764	0.13438	0.13155	0.13022	0.12981	0.12025	0.12248	0.10338	0.1115	0.1076	0.11238	0.10341	0.1003	0.10138	0.09752	0.10684	0.10194	0.09909	0.09924	0.10487	0.10799	0.11254	0.11469	0.12143	0.12701	0.12644	0.12723	0.12534	0.13719	0
Zimbabwe		0.15492	0.15579	0.1451	0.16407	0.155	0.15409	0.18422	0.19653	0.20166	0.20237	0.21972	0.23299	0.22742	0.20708	0.19898	0.19764	0.20376	0.19988	0.19983	0.22761	0.21215	0.19942	0.19982	0.19783	0.17606	0.19331	0.17486	0.17422	0.15068	0.15486	0.16368	0
Afghanistan		0.02698	0.03036	0.03234	0.0387	0.03913	0.03872	0.03976	0.06343	0.11162	0.1103	0.10904	0.04788	0.03233	0.03116	0.03132	0.02652	0.02645	0.02533	0.02461	0.02484	0.02384	0.01768	0.01823	0.01629	0.01612	0.01698	0.01854	0.0265	0.02967	0.09823	0.10445	0
American Samoa		0.00593	0.00692	0.00962	0.00603	0.00695	0.00652	0.00673	0.00686	0.00676	0.00776	0.00807	0.00807	0.00827	0.00797	0.00803	0.0079	0.00801	0.00803	0.00803	0.00803	0.00784	0.00786	0.00799	0.00799	0.00795	0.00846	0.00861	0.00922	0.00856	0.00861	0.00417	0
Australia		2.74282	2.82451	2.89413	2.95852	3.23291	3.26402	3.24834	3.43414	3.41915	3.61846	3.71364	3.70926	3.8123	3.91522	3.92119	4.03627	4.21412	4.54984	4.58179	4.80368	4.83335	5.00345	5.07292	5.1165	5.41692	5.64958	5.72146	5.9419	5.7874	5.76642	5.81146	5.60117
Bangladesh		0.12797	0.13932	0.15025	0.13998	0.16701	0.17329	0.18801	0.20723	0.22947	0.25175	0.25342	0.25726	0.28648	0.29877	0.33952	0.38176	0.38902	0.40315	0.41911	0.46537	0.50385	0.55256	0.584	0.63488	0.6751	0.71835	0.78022	0.81363	0.88801	0.96407	0.98901	0
Bhutan		0.00015	0.00045	0.00058	0.00053	0.00048	0.00062	0.00278	0.00965	0.01213	0.01228	0.01303	0.01324	0.01349	0.01323	0.01482	0.01579	0.01751	0.01757	0.01704	0.0172	0.01725	0.01865	0.02075	0.02275	0.02039	0.02296	0.03515	0.04958	0.05312	0.05402	0.05681	0
Brunei		0.08202	0.08518	0.09301	0.07288	0.06434	0.07673	0.05094	0.08183	0.07133	0.08277	0.07026	0.03869	0.05491	0.04865	0.05032	0.06192	0.05773	0.06159	0.05578	0.06268	0.0649	0.07311	0.08476	0.09008	0.10042	0.11918	0.18266	0.18816	0.19556	0.12763	0.14779	0
Burma (Myanmar)		0.0695	0.07165	0.07937	0.09098	0.09891	0.10365	0.08891	0.08835	0.08415	0.08858	0.08565	0.08442	0.08816	0.09019	0.1107	0.11753	0.11905	0.12728	0.13868	0.14191	0.1675	0.16576	0.18845	0.2121	0.21775	0.28673	0.26736	0.28979	0.28615	0.24095	0.24075	0
Cambodia		0.00455	0.0048	0.00534	0.00562	0.00614	0.00626	0.00653	0.00663	0.00691	0.00694	0.00702	0.00722	0.00744	0.00744	0.00763	0.02116	0.02339	0.02741	0.03201	0.03263	0.03411	0.0398	0.04281	0.04672	0.05206	0.05528	0.06078	0.06562	0.06871	0.06622	0.06118	0
Chi0		17.28743	17.19205	17.93384	19.00967	20.45343	21.00821	22.23982	23.76152	25.44871	25.96036	26.001	27.35981	28.46801	28.6451	32.4849	33.24969	34.98918	38.27189	39.54078	39.0181	40.93559	42.58023	47.29373	52.96116	59.47403	67.91528	74.28128	79.37118	84.94611	94.37119	100.88144	109.61959
Cook Islands		0.00042	0.00084	0.00082	0.00083	0.00083	0.00083	0.00076	0.00076	0.00076	0.00067	0.00067	0.00056	0.00067	0.00067	0.00067	0.00067	0.00067	0.00067	0.00067	0.00067	0.0008	0.0008	0.0008	0.0008	0.00089	0.00098	0.00103	0.00096	0.00101	0.00101	0.00101	0
Fiji		0.01529	0.01577	0.01546	0.0132	0.01452	0.01464	0.01766	0.01474	0.01498	0.01718	0.01895	0.01619	0.0166	0.01577	0.0182	0.01939	0.01996	0.01987	0.0193	0.02123	0.02432	0.02626	0.03022	0.03655	0.03957	0.03893	0.04065	0.0405	0.04348	0.02431	0.02342	0
French Polynesia		0.00312	0.00461	0.00624	0.00842	0.01271	0.01117	0.01396	0.01424	0.01435	0.01439	0.01375	0.01363	0.01333	0.01245	0.01081	0.01142	0.01148	0.01149	0.01167	0.01102	0.01072	0.01065	0.01126	0.01361	0.01366	0.01478	0.01609	0.0161	0.01742	0.01682	0.0169	0
Guam		0.05329	0.0745	0.05799	0.05546	0.01909	0.0094	0.01564	0.01085	0.01126	0.01071	0.02594	0.02942	0.0351	0.04637	0.06643	0.05038	0.04479	0.05113	0.0422	0.047	0.03928	0.04231	0.02882	0.0331	0.0263	0.02938	0.03058	0.02752	0.02386	0.01457	0.01304	0
Hawaiian Trade Zone		0.09468	0.10902	0.10042	0.09487	0.11496	0.1103	0.06534	0	0	0	0	0	0	0	0	0	0	0	0	0	0	0	0	0	0	0	0	0	0	0	0	0
Hong Kong		0.2724	0.28356	0.31099	0.34283	0.35351	0.37015	0.39209	0.44013	0.49405	0.51427	0.50653	0.49495	0.55623	0.56629	0.59318	0.62864	0.68003	0.69036	0.72987	0.86455	0.80565	0.85755	0.92558	0.95826	1.06668	1.11214	1.09962	1.13409	1.0887	1.21474	1.26287	0
India		4.04087	4.62703	4.73881	4.99261	5.65399	5.91415	6.35848	6.44899	7.04691	7.46151	7.87916	8.37387	8.85036	8.74138	9.95544	11.44322	10.89724	11.48628	12.02733	12.86891	13.33329	13.83718	13.66474	14.11354	15.31959	16.33149	17.63085	18.81378	19.90302	21.41704	21.9198	23.61068
Indonesia		1.16582	1.27211	1.30572	1.38502	1.46096	1.53516	1.65327	1.72279	1.84744	2.09257	2.30874	2.53466	2.63828	2.77514	3.10456	3.24227	3.53148	3.62664	3.50553	3.86352	3.87305	3.93491	4.08854	4.104	4.43032	4.64683	5.0977	5.32105	5.43696	5.80577	6.05509	0
Japan		15.19765	15.12096	14.57132	14.29306	15.64557	15.69054	15.70954	16.1997	17.21189	17.74972	18.76828	19.31878	19.35087	19.53318	20.33497	20.942	21.30911	21.84425	21.46463	21.9438	22.41466	22.20305	22.11821	22.60477	23.242	23.1348	22.86986	23.04962	21.89256	20.69509	21.77269	20.82308
Kiribati		0.00034	0.0004	0.0004	0.0004	0.00029	0.00029	0.00026	0.00031	0.00031	0.00031	0.00031	0.00037	0.00031	0.00031	0.00031	0.00031	0.00031	0.00031	0.00031	0.00031	0.00035	0.00035	0.00045	0.00045	0.00045	0.00054	0.00054	0.00057	0.00053	0.00087	0.00087	0
Korea, North		1.32754	1.37409	1.43933	1.50349	1.54723	1.62406	1.61938	1.56274	1.9215	1.57464	1.53212	1.49528	1.31677	1.21589	1.14549	1.06627	0.91771	0.83831	0.75979	0.82353	0.85941	0.88168	0.85064	0.87877	0.89887	0.93287	0.93706	0.80423	0.88522	0.8345	0.81923	0
Korea, South		1.75836	1.82226	1.83276	2.01014	2.13481	2.30592	2.5749	2.81632	3.12305	3.39632	3.84131	4.34329	4.83041	5.39184	5.83614	6.3618	6.74567	7.32742	6.90261	7.47171	7.8348	8.10102	8.51247	8.76202	9.00854	9.33207	9.44994	9.83603	9.8871	9.97149	10.7827	11.16071
Laos		0.01311	0.01129	0.01159	0.01078	0.00965	0.00939	0.00969	0.0077	0.00724	0.00908	0.01017	0.01069	0.01087	0.01009	0.01107	0.0137	0.01608	0.01722	0.02297	0.02821	0.03448	0.03469	0.0359	0.03366	0.03681	0.03848	0.04005	0.04305	0.04681	0.04636	0.04524	0
Macau		0.00698	0.00655	0.00699	0.00985	0.01087	0.00893	0.01241	0.01384	0.01374	0.01474	0.01513	0.0152	0.0157	0.01616	0.01852	0.01879	0.0209	0.0214	0.02302	0.02444	0.02211	0.02369	0.02586	0.02686	0.03248	0.02857	0.03522	0.03774	0.04144	0.03313	0.03069	0
Malaysia		0.41839	0.43884	0.45554	0.51398	0.61396	0.69926	0.74984	0.75377	0.79964	0.86664	0.97969	1.0869	1.13703	1.16581	1.42724	1.4696	1.64099	1.67019	1.68847	1.74295	1.97785	2.10768	2.19218	2.26849	2.26098	2.28943	2.36515	2.59795	2.67668	2.78314	2.98849	0
Maldives		0.00021	0.00021	0.00021	0.00021	0.00083	0.0009	0.00114	0.00114	0.00123	0.00123	0.00136	0.00136	0.00141	0.00171	0.00342	0.00483	0.0049	0.00433	0.00468	0.00468	0.00663	0.00713	0.01307	0.0147	0.01027	0.00823	0.01136	0.01279	0.01313	0.01459	0.01459	0
Mongolia		0.08316	0.07573	0.09037	0.09304	0.0942	0.10401	0.11106	0.11697	0.1212	0.11563	0.10901	0.12917	0.11171	0.10046	0.0948	0.10003	0.07572	0.06211	0.06221	0.06154	0.06313	0.06517	0.06955	0.06646	0.07102	0.07177	0.08214	0.08515	0.09026	0.09005	0.09273	0
0uru		0.0019	0.00192	0.00192	0.00192	0.00198	0.00197	0.00197	0.00197	0.00196	0.00197	0.00205	0.00205	0.00209	0.00209	0.0021	0.00214	0.00213	0.00214	0.00214	0.00214	0.00213	0.00214	0.00223	0.00223	0.00226	0.00231	0.00226	0.0023	0.00231	0.00237	0.00237	0
Nepal		0.00827	0.0076	0.00974	0.01093	0.01271	0.01102	0.01392	0.0165	0.01656	0.01667	0.01795	0.02188	0.02353	0.02274	0.02706	0.03035	0.03421	0.03694	0.04958	0.05684	0.05805	0.06212	0.0586	0.06154	0.0631	0.06936	0.06769	0.06982	0.07047	0.07898	0.08436	0
New Caledonia		0.02755	0.02651	0.02087	0.01782	0.02156	0.02264	0.02233	0.02183	0.02386	0.02615	0.02489	0.02548	0.02623	0.02572	0.02599	0.02644	0.02728	0.02536	0.026	0.02653	0.02974	0.0292	0.03227	0.03324	0.03547	0.03513	0.04069	0.0412	0.04466	0.04242	0.04287	0
New Zealand		0.49761	0.49292	0.50297	0.52849	0.56337	0.57527	0.62357	0.62883	0.67438	0.67436	0.70599	0.71003	0.70209	0.72462	0.771	0.77638	0.7685	0.78521	0.77319	0.81135	0.82614	0.83579	0.85376	0.84516	0.87666	0.84479	0.86117	0.86163	0.85232	0.84236	0.85742	0.86438
Niue		0.00004	0.00004	0.00004	0.00004	0.00004	0.00004	0.00004	0.00004	0.00004	0.00004	0.00004	0.00004	0.00004	0.00004	0.00004	0.00004	0.00004	0.00004	0.00004	0.00004	0.00004	0.00004	0.00004	0.00004	0.00004	0.00006	0.00007	0.00007	0.00005	0.00005	0.00005	0
Pakistan		0.63141	0.68508	0.78194	0.79211	0.81937	0.87242	0.93272	1.00649	1.07839	1.13443	1.17658	1.24869	1.30998	1.35773	1.5331	1.58131	1.66887	1.69189	1.71871	1.80415	1.84612	1.79929	1.81339	1.91194	1.96634	2.13909	2.38416	2.48149	2.47811	2.50371	2.55969	0
Papua New Guinea		0.02903	0.02892	0.02886	0.02972	0.0335	0.03514	0.03586	0.03907	0.0368	0.03777	0.03829	0.03802	0.03996	0.04005	0.03886	0.04525	0.04704	0.04448	0.04474	0.04526	0.04557	0.04578	0.06074	0.06931	0.06853	0.06962	0.07245	0.07309	0.08396	0.05778	0.05858	0
Philippines		0.55327	0.53651	0.54076	0.52365	0.5028	0.48589	0.49218	0.55121	0.59046	0.65935	0.67806	0.67665	0.71794	0.7397	0.8428	0.90459	0.96042	1.01646	1.04219	1.1119	1.13956	1.12599	1.14734	1.18464	1.21389	1.2158	1.20589	1.17952	1.20299	1.14336	1.21734	0
Samoa		0.00145	0.00154	0.00171	0.00171	0.00222	0.00181	0.00184	0.00182	0.00182	0.00193	0.00202	0.00202	0.00211	0.00211	0.00202	0.00217	0.0022	0.00224	0.00229	0.00234	0.00234	0.00248	0.0027	0.00263	0.00265	0.00279	0.00275	0.00281	0.00282	0.00286	0.00287	0
Singapore		0.44171	0.46278	0.49037	0.48736	0.51378	0.49804	0.57213	0.63386	0.67652	0.7329	0.80437	0.85962	0.97456	0.96674	1.17263	1.19025	1.35675	1.45578	1.50448	1.49027	1.52664	1.62081	1.60212	1.69219	1.90294	2.03676	2.08333	2.26036	2.53059	2.89374	3.37195	0
Solomon Islands		0.00147	0.00208	0.00189	0.00209	0.0021	0.00183	0.00184	0.00212	0.00233	0.00242	0.00247	0.00247	0.00242	0.00223	0.00234	0.00242	0.00242	0.00242	0.00242	0.00242	0.0025	0.00251	0.0026	0.0026	0.00267	0.00294	0.00273	0.00303	0.00294	0.00273	0.003	0
Sri Lanka		0.0883	0.08934	0.09251	0.09056	0.10712	0.09586	0.09848	0.10326	0.09914	0.09549	0.10563	0.10529	0.10714	0.11889	0.13631	0.14655	0.14603	0.16136	0.16774	0.17986	0.18938	0.18644	0.18871	0.20061	0.19925	0.2195	0.21647	0.22235	0.22215	0.22402	0.22781	0
Taiwan		1.11685	1.07033	1.0703	1.22045	1.41214	1.45643	1.55603	1.66344	1.79761	1.91653	2.02747	2.08166	2.19362	2.12023	2.57914	2.83434	3.03307	3.1756	3.3658	3.5464	3.80833	3.85665	4.09014	4.2601	4.39973	4.435	4.56696	4.61181	4.56075	4.49634	4.82987	0
Thailand		0.50786	0.54449	0.53202	0.56767	0.6305	0.70186	0.7224	0.79284	0.90767	1.07364	1.25451	1.37084	1.46711	1.5766	1.86981	2.11672	2.44968	2.59492	2.43736	2.50252	2.57173	2.69236	2.93221	3.20772	3.44176	3.65174	3.70545	3.83697	3.95005	4.05101	4.32479	0
Timor-Leste (East Timor)		0	0	0	0	0	0	0	0	0	0	0	0	0	0	0	0	0	0	0	0	0	0	0	0.0023	0.0025	0.00249	0.00254	0.00462	0.00479	0.00262	0.00262	0
Tonga		0.00043	0.00064	0.00059	0.00064	0.00064	0.00066	0.00066	0.00097	0.00115	0.00125	0.00125	0.00142	0.00141	0.00141	0.00165	0.00165	0.00183	0.00188	0.00183	0.00183	0.00187	0.00178	0.00159	0.00159	0.00171	0.00208	0.00246	0.00252	0.00253	0.00252	0.00252	0
U.S. Pacific Islands		0.00219	0.00218	0.00218	0.00218	0.00206	0.00202	0.00217	0.00217	0.00286	0.00425	0.00438	0.00438	0.00441	0.00423	0.00434	0.00447	0.00454	0.00446	0.00446	0.00441	0.0044	0.00442	0.00434	0.00434	0.00431	0.00432	0.00442	0.0045	0.00507	0.00441	0.00513	0
Vanuatu		0.00172	0.0015	0.00151	0.00147	0.00154	0.00167	0.00167	0.0016	0.00189	0.00168	0.00177	0.00139	0.00092	0.00087	0.00092	0.00092	0.00092	0.00092	0.00092	0.00092	0.00118	0.00118	0.00127	0.00127	0.00131	0.0014	0.00136	0.00158	0.00143	0.00175	0.00175	0
Viet0m		0.17136	0.16951	0.18354	0.18621	0.19248	0.21448	0.1915	0.22003	0.20047	0.24265	0.26463	0.28084	0.29175	0.33307	0.367	0.47714	0.56711	0.58366	0.61132	0.68331	0.73608	0.81314	0.90187	0.97817	1.06511	1.17323	1.30862	1.4182	1.63544	1.67657	1.86492	0
world		283.13222	280.91055	280.50338	284.32194	299.67007	307.0377	314.70146	324.51648	337.01966	342.79595	346.00557	347.19465	347.17571	342.15712	355.14604	362.93128	372.08397	379.19242	382.03688	389.13984	400.05326	402.2518	412.19215	425.8547	444.67541	459.27325	470.12873	482.84472	490.67091	487.56081	510.53183
