# Supplementary material
Source: MDPI journal article supplement (https://www.mdpi.com/1099-4300/15/12/5565)
Supplement: s2 [file s2 › Sources/Figure 2/Figure_2b.csv]

		1980	1981	1982	1983	1984	1985	1986	1987	1988	1989	1990	1991	1992	1993	1994	1995	1996	1997	1998	1999	2000	2001	2002	2003	2004	2005	2006	2007	2008	2009	2010	2011
Bermuda		0.05473	0.05491	0.05517	0.05551	0.05585	0.05618	0.05651	0.05683	0.05717	0.05749	0.05778	0.0581	0.0587	0.05924	0.05975	0.06029	0.06087	0.06145	0.06198	0.06251	0.06306	0.06361	0.06418	0.06476	0.06534	0.06591	0.06644	0.06692	0.06739	0.06784	0.06827	0.06868
Ca0da		24.5933	24.9	25.2019	25.4563	25.7018	25.9416	26.2038	26.5497	26.8948	27.3793	27.7906	28.1179	28.54489	28.95334	29.33081	29.69053	30.02632	30.3056	30.55166	30.82026	31.09956	31.37674	31.64096	31.88931	32.13476	32.38638	32.65668	32.93596	33.2127	33.48721	33.75974	34.03059
Greenland		0.05021	0.05103	0.05166	0.05211	0.05263	0.05315	0.05364	0.0541	0.05485	0.05541	0.05563	0.05554	0.05549	0.05564	0.05592	0.05619	0.05634	0.05651	0.05661	0.0567	0.05689	0.05713	0.05736	0.05754	0.0577	0.05778	0.05764	0.05753	0.05756	0.0576	0.05764	0.05767
Mexico		68.34748	69.96926	71.6409	73.36288	75.08014	76.76723	78.44243	80.12249	81.78182	83.36684	84.91365	86.48803	88.11103	89.74914	91.3379	92.88035	94.39858	95.89515	97.32506	98.61691	99.92662	101.24696	102.47993	103.71806	104.95959	106.2029	107.44953	108.70089	109.9554	111.21179	112.46886	113.72423
Saint Pierre and Miquelon		0.00599	0.00601	0.00605	0.00607	0.00611	0.00616	0.00621	0.00625	0.00628	0.00631	0.00632	0.00633	0.00636	0.00638	0.0064	0.0064	0.00641	0.00642	0.00642	0.00643	0.00641	0.00637	0.00633	0.00629	0.00625	0.0062	0.00615	0.0061	0.00605	0.006	0.00594	0.00589
United States		227.22468	229.46571	231.66446	233.79199	235.8249	237.9238	240.13289	242.28892	244.49898	246.81923	249.62281	252.98094	256.51422	259.91859	263.12582	266.27839	269.39428	272.64693	275.8541	279.04017	282.16241	284.96896	287.62519	290.10793	292.8053	295.5166	298.37991	301.23121	304.09397	306.77153	309.33022	311.59192
Antarctica		0	0	0	0	0	0	0	0	0	0	0	0	0	0	0	0	0	0	0	0	0	0	0	0	0	0	0	0	0	0	0	0
Antigua and Barbuda		0.06855	0.06826	0.06801	0.06562	0.06447	0.0644	0.0644	0.06442	0.06443	0.06439	0.06416	0.06403	0.06518	0.06633	0.06749	0.06871	0.07006	0.07145	0.07278	0.07402	0.07535	0.07673	0.07794	0.07907	0.08019	0.08128	0.08234	0.08343	0.08452	0.08563	0.08675	0.08788
Argenti0		28.3698	28.84806	29.32988	29.79355	30.23064	30.67176	31.14499	31.62462	32.09932	32.57162	33.03558	33.50441	33.96685	34.40715	34.84689	35.27384	35.68296	36.10216	36.51792	36.92342	37.33565	37.69417	37.99945	38.33688	38.74183	39.18126	39.61443	40.04882	40.482	40.91358	41.3432	41.76973
Aruba		0	0	0	0	0	0	0.0598	0.05918	0.0595	0.06069	0.06303	0.0663	0.06948	0.07407	0.07785	0.07996	0.08307	0.08621	0.0882	0.08926	0.09	0.09097	0.09217	0.09372	0.09546	0.09698	0.0985	0.10002	0.10154	0.10307	0.10459	0.10611
Bahamas, The		0.20976	0.21345	0.21713	0.22086	0.22462	0.2282	0.23143	0.23448	0.23771	0.24124	0.24513	0.24931	0.25356	0.25766	0.26151	0.26518	0.26888	0.27256	0.27599	0.27931	0.28259	0.28569	0.28858	0.29135	0.29406	0.29671	0.29929	0.30197	0.30473	0.30755	0.31043	0.31331
Barbados		0.25197	0.25236	0.25348	0.25485	0.25611	0.25725	0.25827	0.25912	0.25995	0.26109	0.26226	0.26334	0.2646	0.2657	0.26663	0.26767	0.26881	0.27006	0.27129	0.2725	0.27368	0.27491	0.27622	0.27755	0.27882	0.28004	0.28121	0.28236	0.2835	0.28459	0.28565	0.28671
Belize		0.14442	0.14921	0.1533	0.15685	0.16081	0.16556	0.17124	0.17635	0.1814	0.18643	0.19087	0.19575	0.20082	0.20609	0.21155	0.21717	0.22297	0.22895	0.23513	0.24148	0.248	0.25464	0.2613	0.26796	0.27462	0.28129	0.28795	0.29461	0.30127	0.3079	0.31452	0.32112
Bolivia		5.4413	5.54522	5.64222	5.73743	5.83429	5.93494	6.04135	6.15637	6.28316	6.42314	6.5739	6.73148	6.89345	7.05434	7.21481	7.37487	7.5344	7.69515	7.8589	8.02556	8.1951	8.36745	8.54249	8.71906	8.89597	9.07294	9.24971	9.42594	9.60126	9.77525	9.94742	10.11868
Brazil		121.0637	123.96152	126.89022	129.82126	132.79307	135.73318	138.56722	141.35247	144.09625	146.79795	149.40948	151.9442	154.46082	156.96384	159.44837	161.91145	164.36947	166.84021	169.32208	171.81474	174.31539	176.78996	179.20483	181.55317	183.82754	186.02	188.13106	190.16742	192.13027	194.01906	195.83419	197.5955
Cayman Islands		0.01708	0.0179	0.01852	0.01909	0.02002	0.02085	0.02144	0.02207	0.0245	0.02507	0.02636	0.02751	0.02868	0.03001	0.0313	0.03249	0.03368	0.03487	0.03606	0.03725	0.03844	0.03962	0.0408	0.04199	0.04316	0.04434	0.04552	0.04669	0.04786	0.04904	0.05021	0.05138
Chile		10.99851	11.17585	11.36892	11.56765	11.76167	11.95215	12.14493	12.34445	12.55462	12.77425	13.00785	13.25059	13.48908	13.72236	13.95214	14.17253	14.38333	14.59102	14.79408	14.99047	15.17457	15.34773	15.51481	15.67516	15.82868	15.97915	16.13039	16.28304	16.44103	16.60195	16.7599	16.91502
Colombia		26.63129	27.21489	27.82604	28.45499	29.09546	29.74762	30.41039	31.0853	31.77087	32.46085	33.14725	33.83221	34.52032	35.2056	35.88762	36.53183	37.09791	37.61994	38.13259	38.56386	38.91035	39.31245	39.80495	40.35102	40.92215	41.48778	42.04625	42.59732	43.14111	43.67737	44.20529	44.72554
Costa Rica		2.29912	2.35729	2.42437	2.49435	2.5676	2.64431	2.72338	2.79934	2.87412	2.94989	3.02327	3.09302	3.16836	3.25653	3.3512	3.44474	3.536	3.62532	3.71374	3.80017	3.88258	3.95621	4.02095	4.08382	4.1467	4.20869	4.26977	4.33113	4.39324	4.45505	4.51622	4.57656
Cuba		9.65298	9.71198	9.78922	9.88115	9.9733	10.06467	10.14267	10.21415	10.30169	10.4027	10.50665	10.60254	10.68128	10.74381	10.79795	10.84748	10.89085	10.92884	10.97376	11.02594	11.07185	11.10382	11.13159	11.16718	11.19518	11.19844	11.17983	11.16014	11.13489	11.10972	11.09842	11.08733
Dominica		0.07389	0.07352	0.07381	0.07429	0.07399	0.07311	0.07238	0.07182	0.07134	0.07051	0.07001	0.07012	0.07028	0.07042	0.07092	0.07142	0.071	0.07028	0.07004	0.07035	0.07082	0.07121	0.07153	0.07173	0.07193	0.07212	0.07225	0.07238	0.07251	0.07266	0.07281	0.07297
Dominican Republic		5.69686	5.83171	5.96874	6.10582	6.24155	6.37855	6.51682	6.65696	6.79877	6.94187	7.08362	7.2248	7.36293	7.49428	7.62413	7.75897	7.89898	8.03994	8.18221	8.3252	8.46891	8.61355	8.7569	8.89658	9.03239	9.16447	9.29504	9.42623	9.55818	9.69079	9.82382	9.95665
Ecuador		7.9205	8.14108	8.36585	8.59349	8.82583	9.06166	9.30108	9.54516	9.79412	10.04822	10.31804	10.42992	10.55381	10.75368	11.01255	11.26561	11.52648	11.79247	12.05063	12.26831	12.44584	12.62912	12.82728	13.07418	13.3684	13.66232	13.91706	14.13496	14.35447	14.5731	14.79061	15.00734
El Salvador		4.57041	4.51972	4.47992	4.52671	4.59375	4.67105	4.75832	4.85014	4.93899	5.02478	5.10982	5.19624	5.28601	5.33415	5.3952	5.47983	5.56411	5.63681	5.71157	5.78837	5.84982	5.8837	5.90183	5.91985	5.93512	5.95622	5.97089	5.98175	6.00645	6.0306	6.05206	6.07177
Falkland Islands (Islas Malvi0s)		0.002	0.002	0.002	0.002	0.002	0.002	0.002	0.002	0.002	0.002	0.002	0.002	0.002	0.002	0.002	0.002	0.002	0.00243	0.0026	0.0028	0.00285	0.0029	0.00293	0.00297	0.00297	0.00297	0.00297	0.00297	0.00314	0.00314	0.00314	0.00314
French Guia0		0.07	0.07	0.07	0.08	0.08	0.09	0.09	0.1	0.11	0.11	0.12	0.12	0.13	0.13	0.14	0.15	0.15	0.16	0.17	0.17436	0.17883	0.18342	0.18812	0.19294	0.19789	0.20296	0.20817	0.2135	0.21898	0.22459	0.23035	0.23625
Gre0da		0.09016	0.09235	0.09241	0.09253	0.09274	0.09306	0.09355	0.09406	0.09429	0.0943	0.0942	0.09406	0.09465	0.09576	0.09675	0.09774	0.09865	0.09957	0.10039	0.10099	0.10161	0.10229	0.10284	0.10332	0.10397	0.10459	0.1052	0.10589	0.10656	0.1072	0.10782	0.10842
Guadeloupe		0.337	0.339	0.341	0.345	0.35	0.354	0.358	0.363	0.367	0.38	0.39	0.4	0.40332	0.40666	0.41004	0.41344	0.41687	0.42033	0.42382	0.42733	0.43088	0.43445	0.43806	0.44169	0.44535	0.44905	0.45278	0.45676	0.46078	0.46483	0.46892	0.47305
Guatemala		6.64959	6.82868	6.98272	7.18865	7.38034	7.58084	7.82	8.15988	8.49582	8.73058	8.96555	9.21325	9.36708	9.52288	9.77911	10.02782	10.26795	10.49612	10.70814	10.90342	11.08503	11.28435	11.50667	11.72521	11.93999	12.18255	12.45475	12.72811	13.00221	13.27652	13.55044	13.82446
Guya0		0.75935	0.76193	0.76286	0.76216	0.76207	0.76225	0.76338	0.76496	0.76655	0.7686	0.77153	0.77053	0.7673	0.7669	0.76765	0.76916	0.76889	0.76841	0.7726	0.78005	0.78556	0.78626	0.78273	0.77981	0.77948	0.7765	0.77021	0.76381	0.75806	0.75294	0.74849	0.74477
Haiti		5.5077	5.62287	5.74042	5.86229	5.98898	6.11992	6.25386	6.38967	6.51878	6.65269	6.79794	6.92983	7.06997	7.23284	7.39969	7.5704	7.74067	7.90968	8.08056	8.24971	8.41289	8.56858	8.72319	8.88367	9.04569	9.20467	9.35756	9.50049	9.63908	9.77797	9.64892	9.71993
Honduras		3.40247	3.54306	3.67004	3.79614	3.93299	4.07731	4.22692	4.37326	4.51498	4.65602	4.79403	4.93323	5.07988	5.23262	5.38981	5.55079	5.71284	5.87503	6.0391	6.19088	6.3594	6.52698	6.69369	6.86205	7.02944	7.19307	7.35516	7.51621	7.67585	7.8337	7.98942	8.14356
Jamaica		2.2288	2.25837	2.29831	2.30639	2.31306	2.31818	2.32255	2.32587	2.32943	2.33666	2.34701	2.35772	2.37785	2.40685	2.43644	2.46907	2.50125	2.53118	2.56043	2.58887	2.61563	2.64051	2.66498	2.68915	2.713	2.73651	2.75961	2.78222	2.80433	2.82593	2.84723	2.86838
Martinique		0.326	0.3272	0.32857	0.33229	0.33606	0.33987	0.34372	0.34762	0.35156	0.35554	0.35957	0.36194	0.36432	0.36672	0.36913	0.37156	0.374	0.37646	0.37894	0.38143	0.385	0.38709	0.3892	0.39131	0.39344	0.39558	0.39773	0.4	0.40199	0.40399	0.406	0.40914
Montserrat		0.01177	0.01179	0.01166	0.01156	0.01144	0.01132	0.01121	0.01109	0.01097	0.01085	0.01073	0.01061	0.0105	0.01041	0.01034	0.01027	0.00795	0.00595	0.00338	0.00338	0.00395	0.00424	0.00481	0.00449	0.00496	0.00453	0.00463	0.00451	0.00508	0.0051	0.00512	0.00514
Netherlands Antilles		0.23244	0.23449	0.23757	0.24092	0.24385	0.24443	0.18433	0.18567	0.18669	0.18763	0.18879	0.19014	0.192	0.1945	0.19679	0.19891	0.20124	0.20354	0.20581	0.20802	0.21018	0.21229	0.21434	0.21632	0.21824	0.2201	0.22189	0.22365	0.22537	0.22705	0.22869	0.2305
Nicaragua		2.80303	2.89865	2.97608	3.04391	3.11424	3.18014	3.24809	3.32238	3.40356	3.49206	3.64356	3.83888	4.00651	4.15638	4.28936	4.40189	4.50278	4.59821	4.68884	4.77785	4.86617	4.95223	5.03565	5.11614	5.19339	5.26715	5.33829	5.40778	5.4755	5.54117	5.60445	5.6663
Pa0ma		1.95957	1.9989	2.0395	2.08079	2.12346	2.16762	2.21216	2.25674	2.30168	2.3472	2.39344	2.44075	2.48923	2.53836	2.58771	2.63817	2.68979	2.74368	2.79723	2.84779	2.89951	2.95229	3.00342	3.05361	3.10418	3.15503	3.20648	3.25833	3.30968	3.36047	3.41068	3.46046
Paraguay		3.1716	3.25084	3.33837	3.43192	3.53055	3.63346	3.7399	3.84989	3.96344	4.08056	4.20049	4.32234	4.44589	4.57099	4.69758	4.82556	4.95484	5.08116	5.20018	5.31154	5.41824	5.5234	5.62689	5.72855	5.82816	5.92554	6.02047	6.113	6.2032	6.29088	6.37583	6.45906
Peru		17.2953	17.7548	18.16126	18.5668	18.97073	19.37918	19.79825	20.22705	20.66492	21.11116	21.565	22.02556	22.49191	22.96304	23.42364	23.8633	24.28642	24.69215	25.07883	25.44484	25.79696	26.14228	26.47998	26.80935	27.12967	27.44239	27.74915	28.04973	28.34788	28.64737	28.94797	29.24894
Puerto Rico		3.20965	3.23897	3.279	3.31603	3.35004	3.38211	3.4133	3.44447	3.47499	3.5056	3.53691	3.56211	3.58518	3.6155	3.64924	3.6831	3.72466	3.75943	3.7811	3.80008	3.81061	3.81877	3.8237	3.8261	3.82688	3.82136	3.80521	3.783	3.76087	3.74041	3.72198	3.70669
Saint Kitts and Nevis		0.04357	0.04348	0.04338	0.04323	0.04309	0.04293	0.04273	0.04248	0.04219	0.04192	0.04166	0.04141	0.04154	0.04206	0.04261	0.04313	0.04358	0.04407	0.04461	0.04513	0.04566	0.04619	0.04669	0.04714	0.04753	0.0479	0.04828	0.04866	0.04906	0.04948	0.0499	0.05031
Saint Lucia		0.12248	0.124	0.12558	0.12729	0.12912	0.13101	0.13271	0.13418	0.1355	0.1365	0.13756	0.13917	0.14099	0.14279	0.14464	0.1465	0.14817	0.14971	0.15102	0.15211	0.1533	0.1544	0.1553	0.15601	0.15666	0.15737	0.15813	0.15887	0.15959	0.16027	0.16092	0.16156
Saint Vincent/Gre0dines		0.09814	0.0992	0.10048	0.10181	0.10289	0.10385	0.10476	0.1055	0.10614	0.10675	0.10739	0.10796	0.10822	0.10854	0.10869	0.10879	0.10877	0.10861	0.1084	0.10812	0.10786	0.10761	0.10726	0.10688	0.10648	0.10607	0.10569	0.10531	0.10494	0.10457	0.10422	0.10387
Suri0me		0.35408	0.36117	0.37021	0.37914	0.38702	0.39447	0.40014	0.40391	0.40791	0.41293	0.41608	0.41752	0.41957	0.421	0.42307	0.42774	0.43318	0.43968	0.44743	0.45574	0.46404	0.47185	0.48001	0.48813	0.4959	0.50364	0.5119	0.52093	0.52982	0.53813	0.54586	0.55316
Trinidad and Tobago		1.09051	1.10784	1.12732	1.14815	1.16888	1.18903	1.20833	1.22499	1.23838	1.24816	1.25519	1.26039	1.2635	1.26512	1.26525	1.26432	1.26246	1.26015	1.25764	1.25463	1.25178	1.24905	1.24584	1.24243	1.23933	1.23669	1.23456	1.23281	1.23132	1.22995	1.22869	1.22751
Turks and Caicos Islands		0.00747	0.00779	0.00815	0.00852	0.00891	0.00932	0.00973	0.01016	0.01061	0.01106	0.01151	0.01214	0.0128	0.01349	0.0142	0.01494	0.01572	0.01654	0.01742	0.01834	0.01927	0.02022	0.02141	0.02292	0.02495	0.02759	0.03058	0.03391	0.03762	0.04098	0.04321	0.04482
Uruguay		2.93049	2.94813	2.96835	2.98883	3.00827	3.01887	3.03226	3.04498	3.05763	3.07118	3.08512	3.09871	3.11143	3.12383	3.13703	3.15004	3.16414	3.18092	3.19592	3.20795	3.21979	3.23119	3.24159	3.25065	3.25847	3.26491	3.27131	3.27888	3.28637	3.29377	3.30108	3.30854
Venezuela		14.76789	15.16626	15.62077	16.08442	16.54452	16.99751	17.45016	17.91018	18.37853	18.85072	19.32522	19.79068	20.24606	20.69145	21.12604	21.549	21.96076	22.3618	22.75136	23.12864	23.49275	23.84387	24.19177	24.54543	24.90462	25.26918	25.64146	26.02353	26.41482	26.81484	27.22323	27.63574
Virgin Islands, U.S.		0.09964	0.09985	0.10007	0.10035	0.1006	0.10076	0.10084	0.1009	0.10095	0.10104	0.10396	0.10481	0.10571	0.10658	0.10732	0.10782	0.10809	0.10836	0.10854	0.1086	0.10864	0.10839	0.10821	0.10809	0.10795	0.10786	0.1077	0.10742	0.10709	0.10671	0.10627	0.10578
Virgin Islands, British		0.011	0.01142	0.01182	0.01226	0.01273	0.01318	0.01363	0.0141	0.01462	0.01514	0.01569	0.01627	0.01699	0.01769	0.01838	0.01906	0.01974	0.02044	0.02113	0.02181	0.02251	0.0232	0.02386	0.02449	0.02514	0.02587	0.02668	0.02746	0.02818	0.0289	0.02964	0.03039
Albania		2.67141	2.72427	2.7801	2.83732	2.896	2.9567	3.01544	3.07532	3.13684	3.1958	3.24493	3.18105	3.07201	3.06629	3.11116	3.15815	3.2036	3.22541	3.21277	3.18733	3.15835	3.128	3.09803	3.06967	3.04564	3.02453	3.00578	2.99158	2.98412	2.98254	2.98695	2.99467
Austria		7.54943	7.56463	7.57461	7.5529	7.55413	7.55978	7.56824	7.5789	7.59979	7.62786	7.72295	7.81842	7.91497	7.9886	8.02754	8.04743	8.06085	8.06988	8.07862	8.09416	8.11341	8.13169	8.14831	8.16266	8.17476	8.18469	8.19288	8.19978	8.20553	8.21028	8.21416	8.21728
Belgium		9.8468	9.8524	9.8563	9.85552	9.8553	9.8582	9.8618	9.8702	9.884	9.9377	9.96931	10.00449	10.04562	10.08543	10.12291	10.15546	10.17893	10.19979	10.21703	10.23566	10.26362	10.29168	10.31197	10.33082	10.34828	10.36439	10.37907	10.39223	10.40395	10.41434	10.42349	10.43148
Bosnia and Herzegovi0		0	0	0	0	0	0	0	0	0	0	0	0	4.12913	3.81656	3.63497	3.54665	3.55909	3.59069	3.62223	3.71723	3.80551	3.82236	3.82664	3.84273	3.87689	3.8931	3.89441	3.89185	3.88895	3.88694	3.8849	3.88236
Bulgaria		8.84353	8.86944	8.8921	8.91028	8.92827	8.94357	8.95877	8.97196	8.98203	8.99006	8.89403	8.77237	8.65851	8.44187	8.35334	8.25581	8.16103	8.06606	7.97177	7.89323	7.8185	7.73842	7.6618	7.5884	7.51797	7.45035	7.38537	7.32286	7.26268	7.20469	7.14879	7.09364
Croatia		0	0	0	0	0	0	0	0	0	0	0	0	4.49401	4.48607	4.51119	4.49668	4.46403	4.44459	4.42019	4.40838	4.41083	4.43911	4.48102	4.49778	4.49687	4.4959	4.49475	4.49331	4.49154	4.48941	4.48688	4.4838
Cyprus		0.63027	0.63805	0.64532	0.6565	0.66797	0.67922	0.69043	0.70162	0.71303	0.72686	0.74506	0.76623	0.78847	0.80976	0.82921	0.84735	0.8643	0.87985	0.89373	0.90688	0.91968	0.93263	0.94681	0.96465	0.98719	1.01074	1.03103	1.04891	1.06682	1.08475	1.10268	1.12049
Czech Republic		0	0	0	0	0	0	0	0	0	0	0	0	0	10.32643	10.33016	10.32383	10.31182	10.30071	10.29095	10.28044	10.27013	10.26231	10.2563	10.25109	10.24618	10.24114	10.23546	10.22874	10.22091	10.2119	10.20171	10.19021
Denmark		5.12303	5.12157	5.11781	5.1143	5.11162	5.11369	5.12053	5.12702	5.12952	5.13259	5.14095	5.15435	5.17139	5.18839	5.2056	5.23261	5.26208	5.28366	5.30277	5.32013	5.33742	5.35583	5.37469	5.39414	5.41339	5.43234	5.45066	5.46812	5.48472	5.50051	5.51558	5.52989
Faroe Islands		0.04345	0.04386	0.04425	0.04457	0.04506	0.04557	0.04605	0.04668	0.04709	0.04728	0.04744	0.04757	0.04778	0.04609	0.0445	0.04354	0.04359	0.04405	0.04456	0.04512	0.04579	0.04659	0.04735	0.04795	0.04829	0.04831	0.04832	0.04849	0.04867	0.04886	0.04906	0.04927
Finland		4.77954	4.79996	4.82693	4.85579	4.88179	4.90178	4.91739	4.93173	4.94663	4.96244	4.98643	5.01379	5.04104	5.06485	5.08604	5.10465	5.12031	5.13441	5.14698	5.1581	5.1686	5.18031	5.19304	5.20441	5.21451	5.22344	5.23137	5.23846	5.24475	5.25028	5.25507	5.25925
Former Czechoslovakia		15.25468	15.3116	15.35175	15.38826	15.4233	15.45479	15.48092	15.51092	15.537	15.55901	15.57213	15.58677	15.61859	0	0	0	0	0	0	0	0	0	0	0	0	0	0	0	0	0	0	0
Former Serbia and Montenegro		0	0	0	0	0	0	0	0	0	0	0	0	10.26585	10.30694	10.35104	10.39051	10.45074	10.47286	10.34279	10.1599	10.03677	9.99537	10.00203	9.99637	9.98628	9.96876	0	0	0	0	0	0
Former Yugoslavia		21.76903	21.90219	22.04711	22.1733	22.28131	22.40615	22.52349	22.63202	22.73373	22.82747	22.90716	22.97654	0	0	0	0	0	0	0	0	0	0	0	0	0	0	0	0	0	0	0	0
France		55.16317	55.4547	55.75647	55.99228	56.31292	56.56097	56.79954	57.06637	57.33527	57.90528	58.25547	58.60482	58.95411	59.26843	59.54813	59.82304	60.09495	60.36574	60.64372	60.93525	61.25536	61.60593	61.96362	62.3119	62.67843	63.05974	63.45687	63.85286	64.22025	64.57993	64.94083	65.29609
Germany		0	0	0	0	0	0	0	0	0	0	0	79.98424	80.59776	81.13227	81.41416	81.6537	81.89067	82.01107	82.02367	82.07478	82.18367	82.32066	82.45842	82.50455	82.48721	82.43942	82.34636	82.23686	82.06537	81.8377	81.64445	81.47183
Germany, East		16.737	16.727	16.721	16.711	16.688	16.644	16.577	16.49	16.396	16.311	16.249	0	0	0	0	0	0	0	0	0	0	0	0	0	0	0	0	0	0	0	0	0
Germany, West		61.5609	61.67483	61.61427	61.41066	61.16742	61.04091	61.13649	61.2283	61.63457	62.33391	63.13139	0	0	0	0	0	0	0	0	0	0	0	0	0	0	0	0	0	0	0	0	0
Gibraltar		0.02883	0.02927	0.02885	0.02835	0.02823	0.02865	0.02907	0.02953	0.03003	0.03042	0.02911	0.0281	0.02809	0.02722	0.02678	0.02677	0.02678	0.02675	0.02675	0.02676	0.02727	0.02802	0.0282	0.02832	0.02841	0.02846	0.02854	0.02861	0.02871	0.0288	0.02888	0.02896
Greece		9.64251	9.72935	9.78648	9.84053	9.88717	9.92325	9.95137	9.97449	9.98272	10.03077	10.1296	10.25088	10.32543	10.38299	10.42983	10.45755	10.47942	10.50237	10.52007	10.53675	10.55911	10.58152	10.60386	10.62595	10.64753	10.66835	10.68806	10.70629	10.72282	10.73743	10.74994	10.76014
Hungary		10.71112	10.71185	10.70554	10.68946	10.6681	10.64871	10.63056	10.61274	10.4425	10.39796	10.37188	10.39781	10.38305	10.33003	10.29655	10.28081	10.2593	10.22955	10.2004	10.17161	10.14743	10.12993	10.11278	10.09199	10.07261	10.05762	10.04627	10.03423	10.02048	10.00717	9.99234	9.97606
Iceland		0.22816	0.2308	0.234	0.23704	0.2395	0.2414	0.243	0.24468	0.24989	0.25275	0.25472	0.25683	0.25901	0.26127	0.26608	0.26753	0.269	0.27119	0.274	0.27728	0.28104	0.28481	0.28803	0.29106	0.29397	0.29674	0.29939	0.30193	0.30437	0.30669	0.30891	0.31106
Ireland		3.401	3.4434	3.48	3.504	3.529	3.54	3.5405	3.5399	3.5296	3.5132	3.5082	3.53077	3.55776	3.57835	3.59554	3.61389	3.63618	3.68123	3.72801	3.77486	3.8222	3.8727	3.93313	4.00217	4.09116	4.19919	4.30902	4.41998	4.51771	4.58	4.62292	4.67098
Italy		56.45125	56.50249	56.53237	56.62359	56.68714	56.71812	56.71746	56.71005	56.7111	56.71133	56.71341	56.71471	56.90894	57.08655	57.19807	57.29451	57.40605	57.4929	57.56702	57.65553	57.78437	57.93105	58.0767	58.33602	58.716	59.03781	59.27288	59.62672	60.09131	60.46159	60.74897	61.0168
Luxembourg		0.3644	0.3654	0.36572	0.36589	0.36627	0.36717	0.36902	0.37166	0.37562	0.37762	0.38297	0.38715	0.39255	0.39808	0.40376	0.4097	0.41557	0.42101	0.4265	0.43253	0.43878	0.44478	0.45079	0.45676	0.46269	0.46857	0.47441	0.48022	0.48601	0.49178	0.49754	0.5033
Macedonia		0	0	0	0	0	0	0	0	0	0	0	0	1.88936	1.91756	1.93503	1.95405	1.9711	1.98486	1.99547	2.00499	2.01451	2.02391	2.03044	2.03515	2.04009	2.04526	2.05055	2.05592	2.06132	2.06672	2.07209	2.07733
Malta		0.364	0.36365	0.36022	0.35577	0.35138	0.34704	0.34663	0.34905	0.35195	0.35532	0.35911	0.36258	0.3659	0.37001	0.37361	0.37689	0.37996	0.38295	0.38561	0.3878	0.38995	0.39187	0.39352	0.39518	0.39685	0.39853	0.40021	0.40188	0.40353	0.40517	0.40677	0.40833
Montenegro		0	0	0	0	0	0	0	0	0	0	0	0	0	0	0	0	0	0	0	0	0	0	0	0	0	0	0.69187	0.68474	0.67818	0.67218	0.66673	0.66181
Netherlands		14.15529	14.25772	14.32241	14.37476	14.43353	14.50437	14.58513	14.67877	14.77497	14.86268	14.96587	15.08117	15.18979	15.29108	15.39893	15.47637	15.54531	15.62214	15.71709	15.81991	15.93018	16.04681	16.14547	16.21661	16.26634	16.2991	16.32044	16.35102	16.41006	16.49041	16.57384	16.65373
Norway		4.08562	4.0997	4.11479	4.12843	4.14009	4.15242	4.1666	4.18615	4.20873	4.22614	4.24201	4.26173	4.28636	4.31196	4.33664	4.3591	4.38128	4.40567	4.43272	4.46338	4.4924	4.5152	4.53559	4.5554	4.57456	4.59304	4.61082	4.62793	4.64446	4.66054	4.67631	4.69185
Poland		35.57802	35.90196	36.22738	36.57142	36.90413	37.22579	37.50428	37.74071	37.86684	37.97016	38.11941	38.25322	38.3707	38.46775	38.5483	38.60064	38.62984	38.65496	38.66876	38.66554	38.65416	38.64364	38.62598	38.60285	38.58044	38.55798	38.53687	38.51824	38.5007	38.48292	38.46369	38.44159
Portugal		9.7778	9.85008	9.85965	9.87224	9.88539	9.89719	9.90741	9.91529	9.92061	9.92315	9.92269	9.91901	9.92768	9.96783	10.02769	10.06554	10.09992	10.15642	10.22483	10.28338	10.3356	10.38675	10.43387	10.47996	10.52415	10.56621	10.60587	10.64284	10.67691	10.70792	10.73577	10.76031
Romania		22.13004	22.25655	22.35673	22.40728	22.45379	22.5212	22.59968	22.68637	22.7689	22.85212	22.86595	22.82556	22.79703	22.76576	22.73302	22.68741	22.62247	22.55774	22.51138	22.47629	22.44735	22.4155	22.36575	22.30468	22.24763	22.19716	22.15048	22.10615	22.06081	22.01182	21.95928	21.90455
Serbia		0	0	0	0	0	0	0	0	0	0	0	0	0	0	0	0	0	0	0	0	0	0	0	0	0	0	9.2528	9.23257	7.41388	7.37934	7.34485	7.31056
Slovakia		0	0	0	0	0	0	0	0	0	0	0	0	0	5.32358	5.34526	5.36159	5.37319	5.38301	5.39024	5.39574	5.40032	5.40468	5.41005	5.41641	5.42357	5.43136	5.43945	5.4475	5.45541	5.46305	5.47031	5.47704
Slovenia		0	0	0	0	0	0	0	0	0	0	0	0	1.99921	1.99993	2.00104	2.00283	2.00743	2.01161	2.01081	2.00965	2.01056	2.01118	2.0115	2.0116	2.01147	2.01107	2.01035	2.00925	2.00771	2.00569	2.00314	2.00009
Spain		37.48836	37.7508	37.98331	38.18417	38.36286	38.53485	38.70756	38.8807	39.05388	39.21452	39.35077	39.46142	39.55243	39.6377	39.70788	39.76471	39.82056	39.90724	40.0461	40.25144	40.589	41.04689	41.63961	42.32103	43.00016	43.70437	44.43175	45.21164	45.91037	46.29524	46.50596	46.75478
Sweden		8.31047	8.32049	8.32526	8.32903	8.34262	8.35634	8.38407	8.4214	8.46934	8.52628	8.60082	8.66811	8.71887	8.76928	8.83149	8.87789	8.89223	8.89762	8.90268	8.90979	8.92357	8.93991	8.95417	8.97031	8.9864	9.00177	9.0166	9.03109	9.04539	9.05965	9.07406	9.08873
Switzerland		6.38523	6.4261	6.46943	6.50304	6.53231	6.56707	6.60718	6.65463	6.70951	6.76978	6.84351	6.92508	7.00061	7.06402	7.12099	7.16421	7.18878	7.20216	7.21705	7.2425	7.27725	7.31222	7.34865	7.38454	7.41734	7.44822	7.47865	7.52953	7.611	7.69323	7.76986	7.8501
Turkey		45.04797	46.25323	47.46418	48.66062	49.83974	50.99701	52.12734	53.24267	54.35553	55.46248	56.56068	57.65023	58.73117	59.80053	60.86709	61.94015	63.0178	64.09769	65.17718	66.254	67.3293	68.4049	69.47904	70.54864	71.61354	72.67381	73.72612	74.76784	75.79384	76.80552	77.80412	78.78555
United Kingdom		56.314	56.3826	56.33071	56.36462	56.43518	56.58408	56.75092	56.92704	57.09573	57.25127	57.41072	57.57361	57.73594	57.85424	58.00569	58.1868	58.34457	58.49407	58.68037	58.90968	59.13997	59.37473	59.60152	59.82362	60.12695	60.48735	60.84681	61.24926	61.6426	61.99685	62.34845	62.69836
Armenia		0	0	0	0	0	0	0	0	0	0	0	0	3.37833	3.23157	3.12609	3.06875	3.0634	3.059	3.04915	3.04762	3.04256	3.02759	3.01382	3.00171	2.99136	2.9829	2.97637	2.97165	2.96859	2.967	2.9668	2.96798
Azerbaijan		0	0	0	0	0	0	0	0	0	0	0	0	7.71804	7.83912	7.95214	8.05059	8.13833	8.22351	8.30867	8.38845	8.46308	8.53231	8.59765	8.66291	8.73781	8.82544	8.91917	9.01504	9.11109	9.20678	9.30167	9.39728
Belarus		0	0	0	0	0	0	0	0	0	0	0	0	10.22756	10.25014	10.23804	10.20492	10.17066	10.12853	10.09173	10.06364	10.03339	9.99948	9.95488	9.9049	9.85565	9.80645	9.76371	9.73333	9.71205	9.69633	9.68007	9.66151
Estonia		0	0	0	0	0	0	0	0	0	0	0	0	1.52872	1.49143	1.46754	1.44651	1.42783	1.41335	1.40097	1.38976	1.37984	1.36998	1.36012	1.35072	1.34166	1.33289	1.32433	1.31591	1.3076	1.29937	1.29117	1.28296
Former U.S.S.R.		265.99283	268.2582	270.59504	273.09424	275.6818	278.24046	280.80264	283.30631	285.68984	287.2161	289.11606	290.64642	0	0	0	0	0	0	0	0	0	0	0	0	0	0	0	0	0	0	0	0
Georgia		0	0	0	0	0	0	0	0	0	0	0	0	5.35529	5.24762	5.12081	5.01295	4.93457	4.88348	4.8485	4.81567	4.77721	4.74616	4.72836	4.71092	4.69389	4.6774	4.66147	4.646	4.63084	4.61581	4.60083	4.58587
Kazakhstan		0	0	0	0	0	0	0	0	0	0	0	0	16.96463	16.90239	16.66307	16.38986	16.23655	16.05238	15.84079	15.70948	15.68725	15.73694	15.80213	15.88251	15.98862	16.12267	16.28372	16.45983	16.64964	16.86328	17.08482	17.30451
Kyrgyzstan		0	0	0	0	0	0	0	0	0	0	0	0	4.59206	4.58271	4.57529	4.62002	4.68547	4.75046	4.81667	4.88311	4.93713	4.97683	5.01396	5.05935	5.11354	5.16425	5.21277	5.25556	5.29869	5.35818	5.41047	5.45078
Latvia		0	0	0	0	0	0	0	0	0	0	0	0	2.61587	2.56571	2.52353	2.48801	2.46028	2.43597	2.41317	2.39366	2.37618	2.35823	2.34021	2.32294	2.30631	2.29024	2.27474	2.25981	2.24542	2.2315	2.21797	2.20471
Lithuania		0	0	0	0	0	0	0	0	0	0	0	0	3.70028	3.689	3.67964	3.67358	3.66832	3.66437	3.66117	3.65845	3.65439	3.64575	3.63323	3.62009	3.6079	3.59662	3.58591	3.57544	3.56521	3.55518	3.54532	3.53555
Moldova		0	0	0	0	0	0	0	0	0	0	0	0	4.38231	4.38077	4.37195	4.35507	4.33397	4.30436	4.2662	4.22486	4.18021	4.13509	4.08889	4.04095	3.99461	3.94826	3.90108	3.85544	3.81176	3.7707	3.7318	3.69412
Russia		0	0	0	0	0	0	0	0	0	0	0	0	148.44431	148.48877	148.62186	148.75804	148.59684	148.37355	148.15479	147.69891	147.05397	146.33416	145.52979	144.73728	144.00005	143.31952	142.73575	142.44128	142.39315	142.46149	142.5269	142.52559
Tajikistan		0	0	0	0	0	0	0	0	0	0	0	0	5.50003	5.54663	5.60449	5.67823	5.76436	5.86469	5.98349	6.11086	6.2297	6.3391	6.45201	6.56785	6.68843	6.81479	6.94406	7.0766	7.21188	7.34915	7.48749	7.6272
Turkmenistan		0	0	0	0	0	0	0	0	0	0	0	0	3.83023	3.91796	4.0039	4.07873	4.14267	4.20061	4.26226	4.32469	4.38549	4.44458	4.50262	4.55613	4.60847	4.66416	4.71951	4.77423	4.82933	4.88489	4.94092	4.9975
Ukraine		0	0	0	0	0	0	0	0	0	0	0	0	51.86728	51.88423	51.63555	51.24484	50.81005	50.36745	49.9372	49.48506	49.00522	48.50792	48.05682	47.66708	47.30539	46.95942	46.62033	46.29986	45.99429	45.7004	45.4156	45.13471
Uzbekistan		0	0	0	0	0	0	0	0	0	0	0	0	21.60964	22.1276	22.60382	23.06733	23.52386	23.95222	24.34233	24.70155	25.04182	25.37238	25.69631	25.99214	26.2681	26.53989	26.81046	27.07927	27.34503	27.60601	27.86574	28.1286
Bahrain		0.34757	0.36352	0.3778	0.39264	0.40771	0.42322	0.43941	0.45578	0.47198	0.48863	0.50567	0.52252	0.53802	0.55264	0.5675	0.58207	0.59647	0.61085	0.62521	0.63996	0.65486	0.67209	0.71483	0.781	0.84812	0.91597	0.98439	1.05358	1.10729	1.14437	1.18008	1.2147
Iran		39.70873	41.45082	43.21824	44.98932	46.79208	48.61894	50.46435	52.34019	54.17826	55.92667	58.1001	60.49643	62.31008	63.09966	63.46037	64.21727	65.11578	66.04188	66.95374	67.80393	68.63155	69.53153	70.28374	70.81183	71.4395	72.28271	73.1844	74.09327	75.02536	75.96761	76.9233	77.89122
Iraq		13.23284	13.7031	14.17332	14.65222	15.16055	15.69362	16.24734	16.54319	17.04056	17.57254	18.13996	17.47737	17.86828	18.41148	18.97609	19.56361	20.16797	20.78125	21.40271	22.0356	22.67908	23.33473	24.00405	24.68518	25.37625	26.07609	26.78418	27.50016	28.22144	28.94557	29.67161	30.39957
Israel		5.09743	5.19025	5.2843	5.40155	5.52187	5.64483	5.77007	5.90159	6.04039	6.17702	6.37648	6.64832	6.92977	7.21701	7.52463	7.86008	8.18692	5.66009	5.80873	5.96029	6.11457	6.25134	6.36954	6.49192	6.61773	6.74292	6.86688	6.99006	7.11236	7.2337	7.35399	7.47305
Jordan		2.16278	2.25377	2.34764	2.44068	2.53438	2.63036	2.7275	2.8239	2.92078	3.0235	3.26656	3.63483	3.87091	3.98707	4.08473	4.17643	4.28166	4.38525	4.48522	4.58483	4.68762	4.79335	4.90206	5.01378	5.12826	5.2454	5.61722	5.99719	6.13263	6.26929	6.40709	6.50827
Kuwait		1.36977	1.43219	1.49749	1.56582	1.63731	1.73282	1.80938	1.88722	1.96672	2.04819	2.13116	0.94094	1.40272	1.48804	1.57533	1.66435	1.74074	1.80173	1.85985	1.91633	1.97226	2.02773	2.08331	2.13982	2.19729	2.25666	2.31688	2.3758	2.43319	2.489	2.54317	2.59563
Lebanon		2.8987	2.9517	3.0056	3.06024	3.11544	3.17096	3.22558	3.27798	3.32778	3.37448	3.44018	3.50613	3.54803	3.58539	3.62071	3.6539	3.68504	3.71429	3.74182	3.76753	3.7915	3.81411	3.83546	3.85548	3.87449	3.89239	3.8511	3.89556	4.03802	4.09932	4.12525	4.1431
Oman		1.18548	1.24951	1.3136	1.37675	1.43812	1.49723	1.55439	1.61167	1.67076	1.73179	1.79438	1.86607	1.93949	2.01457	2.07679	2.13857	2.19966	2.25973	2.31861	2.37618	2.43238	2.4873	2.54108	2.59379	2.64561	2.69689	2.7482	2.80028	2.85388	2.90963	2.96772	3.02796
Palestinian Territories		0	0	0	0	0	0	0	0	0	0	0	0	0	0	0	0	0	2.8338	2.92452	3.01665	3.11009	3.20475	3.30059	3.398	3.49718	3.59785	3.69993	3.80337	3.90788	4.01313	4.11908	4.22571
Qatar		0.22909	0.24079	0.25049	0.28183	0.31238	0.34238	0.372	0.38676	0.40196	0.41765	0.43341	0.4486	0.46351	0.47896	0.49445	0.50971	0.52483	0.5476	0.5782	0.60896	0.6399	0.67144	0.70339	0.73564	0.82545	0.97253	1.11991	1.26826	1.41796	1.56853	1.71947	1.84926
Saudi Arabia		10.02152	10.65493	11.28881	11.95226	12.60694	13.33007	13.9983	14.61975	15.23313	15.82936	16.06076	16.30577	17.06075	17.63636	18.20242	18.75504	19.29336	19.81838	20.32909	20.82455	21.3119	21.79609	22.27404	22.74289	23.20004	23.64221	24.0732	24.49852	24.91741	25.32887	25.73178	26.1317
Syria		8.75241	9.04923	9.38665	9.73512	10.09494	10.46614	10.84857	11.24297	11.64601	12.05294	12.5	12.93313	13.31165	13.68518	14.06143	14.44857	14.8437	15.24445	15.64985	16.05894	16.47124	16.88507	17.29982	17.71535	18.13682	18.56267	19.32269	20.48772	21.32486	21.76298	22.19811	22.51775
United Arab Emirates		1.00029	1.06972	1.13755	1.2091	1.28439	1.36348	1.44657	1.53044	1.62275	1.72206	1.82625	1.93669	2.05629	2.1842	2.31918	2.45798	2.59958	2.74633	2.8985	3.05608	3.2193	3.38733	3.5581	3.7317	3.90795	4.0866	4.26591	4.44401	4.6214	4.79849	4.97559	5.14866
Yemen		9.13255	9.39014	9.65762	9.93626	10.22927	10.53993	10.86958	11.21934	11.59107	11.98639	12.41608	12.88242	13.368	13.88576	14.39475	14.86156	15.32572	15.81571	16.3272	16.85909	17.40726	17.97054	18.5462	19.13411	19.73383	20.34467	20.96452	21.59104	22.22285	22.85824	23.49536	24.13349
Algeria		18.80606	19.40704	20.03375	20.68098	21.34055	22.00845	22.64254	23.25496	23.91767	24.56172	25.19045	25.82598	26.49363	27.15475	27.75851	28.3217	28.8376	29.31818	29.76886	30.20485	30.63802	31.07728	31.52371	31.97542	32.45085	32.91757	33.42097	34.0024	34.61942	35.26813	35.94987	36.65429
Angola		7.20581	7.40839	7.61454	7.90661	8.17792	8.38989	8.62405	8.82447	9.03291	9.25035	9.48536	9.73972	10.01666	10.32998	10.65847	10.99959	11.33701	11.67004	12.0133	12.35751	12.6825	12.99797	13.3649	13.81576	14.31526	14.76956	15.20227	15.65176	16.10206	16.56553	17.04287	17.54473
Benin		3.45806	3.56485	3.67513	3.78904	3.90705	4.03048	4.15785	4.28791	4.42211	4.56116	4.70544	4.85506	5.01014	5.25036	5.48815	5.64683	5.82023	6.00623	6.20232	6.40677	6.61912	6.83901	7.06449	7.29371	7.52683	7.77771	8.03171	8.27816	8.53255	8.79183	9.05601	9.32503
Botswa0		0.90048	0.93444	0.97065	1.00702	1.0434	1.07969	1.11576	1.15201	1.18894	1.22652	1.26461	1.3031	1.34473	1.38935	1.43369	1.47759	1.52091	1.56319	1.60401	1.64294	1.67968	1.71401	1.74618	1.77709	1.80783	1.84012	1.87578	1.91342	1.95205	1.99088	2.02931	2.0654
Burki0 Faso		6.31819	6.47437	6.63723	6.80728	6.98504	7.17093	7.3711	7.59181	7.83349	8.09154	8.36104	8.64225	8.93497	9.2377	9.57065	9.90278	10.22018	10.54257	10.87271	11.22531	11.58775	12.03936	12.58496	13.06539	13.47809	13.90389	14.34353	14.79717	15.26474	15.74623	16.24181	16.75146
Burundi		4.29821	4.47776	4.58491	4.7052	4.81683	4.92176	5.01886	5.14452	5.27884	5.40437	5.53564	5.67438	5.85649	5.68543	5.74968	6.16495	6.20373	6.24364	6.41743	6.63114	6.8227	7.04302	7.28679	7.55265	7.85873	8.16194	8.46451	8.78294	9.13931	9.51133	9.86312	10.21619
Cameroon		8.76249	9.04792	9.28255	9.56272	9.86713	10.19137	10.53015	10.8671	11.20098	11.54012	11.8845	12.2303	12.57475	12.92047	13.26417	13.60316	13.94474	14.29013	14.63798	14.9885	15.34304	15.70686	16.09444	16.48901	16.87275	17.26147	17.65786	18.06038	18.46769	18.8793	19.29415	19.71129
Cape Verde		0.29645	0.3002	0.30409	0.3082	0.31249	0.31689	0.32134	0.32587	0.3305	0.33517	0.33976	0.34683	0.35649	0.36624	0.37592	0.38543	0.3948	0.404	0.41297	0.42168	0.43013	0.43845	0.4467	0.45483	0.4628	0.4706	0.47831	0.48599	0.49362	0.50118	0.50866	0.5161
Central African Republic		2.34878	2.41277	2.47757	2.54328	2.62927	2.71415	2.77536	2.84088	2.91718	2.99987	3.08497	3.17449	3.26652	3.36703	3.46585	3.54441	3.62161	3.70738	3.79796	3.88922	3.97986	4.05393	4.12842	4.21492	4.28875	4.36304	4.44895	4.54373	4.64132	4.74192	4.84493	4.95003
Chad		4.52239	4.51494	4.73288	4.97116	5.02517	5.06604	5.2142	5.39152	5.55634	5.71491	5.84141	6.02822	6.26327	6.3791	6.49669	6.76969	7.051	7.26171	7.47932	7.70874	7.94268	8.17941	8.43619	8.74574	9.09766	9.40066	9.64896	9.88566	10.11134	10.32921	10.54346	10.75895
Comoros		0.33976	0.34769	0.35598	0.36462	0.37363	0.38282	0.39206	0.40143	0.41093	0.42059	0.43043	0.44047	0.45073	0.46118	0.47184	0.48268	0.49395	0.50585	0.51834	0.53143	0.54514	0.55949	0.57447	0.59006	0.60626	0.62306	0.64008	0.65694	0.6736	0.69001	0.70612	0.72189
Congo (Brazzaville)		1.67429	1.72374	1.77516	1.82856	1.88398	1.94177	2.00214	2.06497	2.13006	2.19717	2.266	2.3374	2.4104	2.48894	2.57029	2.65	2.73125	2.80247	2.88	2.97232	3.10394	3.23999	3.33042	3.41425	3.50374	3.604	3.70406	3.80233	3.90501	4.01281	4.12592	4.24393
Congo (Kinshasa)		29.01086	29.80632	30.64715	31.44574	32.34153	33.34763	34.38593	35.50415	36.66927	37.87211	39.15107	40.51418	41.84615	43.29002	44.8203	46.70458	47.68471	48.28893	49.34873	50.88995	52.4452	54.05772	55.70164	57.30328	58.94255	60.69805	62.52221	64.35501	66.18715	68.01571	69.85129	71.71287
Cote dIvoire (IvoryCoast)		8.59326	8.92247	9.25983	9.60646	9.96343	10.33168	10.71206	11.10527	11.51174	11.93065	12.49088	13.03952	13.42214	13.86057	14.37992	14.8458	15.28145	15.68623	16.04536	16.45688	16.88458	17.31097	17.68765	18.068	18.50438	18.9205	19.3268	19.74695	20.1796	20.61707	21.0588	21.50416
Djibouti		0.32687	0.34483	0.35616	0.37012	0.37461	0.38222	0.39651	0.40946	0.41715	0.44245	0.49919	0.55198	0.54709	0.53443	0.54689	0.55303	0.56843	0.59249	0.62088	0.64626	0.66942	0.69299	0.71635	0.69078	0.65741	0.6664	0.67914	0.69438	0.7092	0.72462	0.74053	0.75707
Egypt		42.63422	44.1961	45.68181	47.09303	48.55016	50.05238	51.59343	52.3751	53.16221	53.94841	54.90738	55.86165	56.62499	57.3843	58.15695	58.94503	59.75782	61.07191	62.41172	63.77347	65.15855	66.57408	68.02312	69.50186	71.00947	72.54351	74.10059	75.67654	77.26669	78.86664	80.47187	82.07964
Equatorial Guinea		0.25601	0.27178	0.28548	0.29958	0.31464	0.32519	0.33365	0.34247	0.35165	0.36119	0.3711	0.38138	0.39202	0.40304	0.41444	0.42623	0.43842	0.45103	0.46406	0.47754	0.49148	0.50592	0.52076	0.53593	0.55142	0.56723	0.58335	0.59976	0.61646	0.63344	0.6507	0.66823
Eritrea		0	0	0	0	0	0	0	0	0	0	0	0	0	0	3.37969	3.565	3.73306	3.84158	3.96311	4.07957	4.19731	4.33799	4.50543	4.70002	4.90734	5.06956	5.21433	5.35768	5.50203	5.64717	5.79298	5.93948
Ethiopia		36.03646	37.72009	39.47854	40.67392	40.07273	40.68374	41.64255	43.0586	44.59611	46.09369	47.55412	49.44758	51.20519	52.52504	54.03015	55.72546	57.42403	59.07627	60.76488	62.53843	64.36522	66.23045	68.16789	70.17483	72.23899	74.3543	76.53528	78.79945	81.13565	83.54843	86.04293	88.58876
Gabon		0.71383	0.73084	0.75424	0.77902	0.80526	0.83304	0.85945	0.88092	0.89974	0.91884	0.93808	0.96043	0.98637	1.01316	1.04081	1.06907	1.09771	1.12694	1.15717	1.19565	1.23643	1.26915	1.30042	1.33262	1.36441	1.39569	1.42639	1.45645	1.48583	1.51499	1.54526	1.57667
Gambia, The		0.65246	0.67137	0.69084	0.71086	0.74106	0.77252	0.8053	0.83945	0.87508	0.91225	0.95103	0.99149	1.03373	1.07689	1.11959	1.16146	1.20242	1.24246	1.28157	1.31963	1.35658	1.3933	1.43071	1.46892	1.508	1.54791	1.5885	1.62965	1.6713	1.71328	1.75546	1.79786
Gha0		11.15257	11.3626	11.63809	12.43718	13.13132	13.57248	14.14271	14.49772	14.85072	15.20128	15.54881	15.89234	16.23304	16.63795	17.02208	17.32147	17.61719	17.92744	18.26142	18.61154	18.981	19.36667	19.77879	20.21137	20.65025	21.10698	21.58302	22.06857	22.55447	23.05197	23.5712	24.10786
Guinea		4.44737	4.54036	4.63601	4.7344	4.95358	5.22674	5.39433	5.52841	5.66683	5.80969	6.11845	6.55247	6.80052	6.98911	7.20949	7.4457	7.70157	7.79106	7.90661	8.1544	8.35041	8.41692	8.5203	8.75554	8.97198	9.15373	9.34573	9.56922	9.80651	10.05798	10.32403	10.60101
Guinea-Bissau		0.7889	0.80706	0.82577	0.84501	0.86478	0.88506	0.90593	0.92741	0.94954	0.97239	0.99599	1.02022	1.051	1.08446	1.11651	1.14333	1.16626	1.19411	1.22224	1.25041	1.27886	1.30645	1.33312	1.35992	1.38693	1.41416	1.44275	1.47278	1.50318	1.53396	1.56513	1.59668
Kenya		16.3307	16.98747	17.66034	18.34848	19.0508	19.76232	20.47846	21.19784	21.91873	22.63893	23.36094	24.13287	25.03958	25.8445	26.48717	27.163	27.83655	28.51363	29.18822	29.8743	30.6059	31.42309	32.31348	33.24483	34.22344	35.24631	36.31615	37.40888	38.54081	39.7077	40.84314	41.9435
Lesotho		1.35857	1.39518	1.43282	1.47148	1.51111	1.55164	1.5866	1.61569	1.64484	1.67402	1.70326	1.7325	1.76171	1.79079	1.8195	1.84757	1.86905	1.88354	1.8966	1.90767	1.91632	1.92234	1.92564	1.92635	1.9249	1.92212	1.9192	1.91686	1.91547	1.91613	1.91955	1.92489
Liberia		1.8571	1.913	1.97148	2.03237	2.09577	2.16175	2.23038	2.30176	2.37595	2.45297	2.13859	1.81471	1.89388	1.95263	1.91753	1.90028	1.93223	2.09745	2.34951	2.49539	2.60067	2.67979	2.75304	2.76968	2.79594	2.93008	3.10761	3.26994	3.44037	3.58339	3.68508	3.78676
Libya		3.06043	3.19789	3.3364	3.47528	3.61396	3.66003	3.6809	3.77572	3.88324	3.99098	4.09844	4.20512	4.31051	4.41405	4.51709	4.58391	4.61364	4.68516	4.79878	4.91216	5.02475	5.13595	5.24512	5.35327	5.46163	5.57003	5.67821	5.78615	5.89411	6.00225	6.11036	5.76716
Madagascar		8.69125	8.93876	9.19587	9.46302	9.74054	10.02863	10.32739	10.63688	10.95734	11.28916	11.63287	11.98871	12.35668	12.73661	13.12841	13.53236	13.94848	14.3766	14.81658	15.26371	15.71242	16.16861	16.6389	17.12306	17.62109	18.13178	18.65342	19.18567	19.72871	20.28244	20.84662	21.42095
Malawi		6.25893	6.45967	6.66854	6.88393	7.10435	7.33001	7.60855	8.05274	8.58662	9.09083	9.546	9.93081	10.3096	10.49511	10.32045	10.26405	10.52681	10.83884	11.15534	11.47685	11.80151	12.12867	12.46009	12.7968	13.14014	13.49211	13.85568	14.23279	14.62368	15.02876	15.4475	15.87925
Mali		6.86802	7.01105	7.15768	7.30823	7.46315	7.62294	7.78808	7.95896	8.13153	8.31369	8.48685	8.67315	8.90299	9.112	9.3317	9.48832	9.66487	9.92461	10.17851	10.47594	10.78766	11.11158	11.44696	11.79433	12.15423	12.52723	12.91249	13.30921	13.71883	14.14402	14.58261	15.0324
Mauritania		1.54491	1.57765	1.61189	1.64759	1.68477	1.72347	1.76368	1.80539	1.8485	1.88583	1.92498	1.97343	2.04282	2.11924	2.18334	2.23479	2.27068	2.31522	2.3741	2.43691	2.50087	2.56579	2.63185	2.69924	2.76795	2.83794	2.9091	2.98145	3.05493	3.12949	3.20506	3.28163
Mauritius		0.9637	0.97905	0.99204	1.00218	1.01204	1.02054	1.02823	1.03627	1.04494	1.0534	1.0616	1.07172	1.08481	1.09864	1.1113	1.12312	1.13534	1.14835	1.16066	1.17313	1.18593	1.19788	1.20959	1.221	1.23206	1.24282	1.25343	1.2639	1.27419	1.28426	1.2941	1.30372
Morocco		19.48727	19.84622	20.19873	20.6794	21.16079	21.64379	22.12744	22.61059	23.08648	23.5498	23.99997	24.43372	24.86108	25.29264	25.72317	26.1476	26.56357	26.96872	27.36105	27.74199	28.11304	28.47748	28.8389	29.19706	29.55151	29.90096	30.24777	30.59445	30.94046	31.28517	31.62743	31.96836
Mozambique		12.10262	12.36752	12.61346	12.86213	13.0836	13.29305	13.43271	13.22959	12.90366	12.85624	12.98918	13.20776	13.40648	13.88065	14.94023	15.88821	16.38341	16.81139	17.21955	17.60524	17.99679	18.39579	18.80188	19.21533	19.63708	20.06862	20.51167	20.96882	21.43923	21.9217	22.41745	22.94886
0mibia		0	0	0	0	0	0	0	0	0	0	1.47057	1.51199	1.5525	1.59514	1.63833	1.68148	1.72432	1.76614	1.80653	1.8467	1.89344	1.9351	1.96067	1.98343	2.00665	2.02836	2.04915	2.06903	2.08867	2.10866	2.12847	2.14759
Niger		6.09347	6.239	6.38918	6.54413	6.70405	6.86921	7.03981	7.21596	7.39913	7.6023	7.82547	8.05715	8.29818	8.55448	8.82206	9.11028	9.41429	9.7167	10.03565	10.37256	10.72532	11.09919	11.49086	11.90138	12.33168	12.78209	13.25332	13.74043	14.23866	14.74879	15.27002	15.80175
Nigeria		74.82879	77.15766	79.51951	81.17398	82.732	84.89758	87.10096	89.41932	91.78944	94.21272	96.69031	99.22185	101.80561	104.43833	107.11575	109.83332	112.58762	115.37749	118.20337	121.12629	124.20729	127.4507	130.863	134.45082	138.13818	141.8518	145.62752	149.48791	153.4334	157.47338	161.60474	165.82257
Reunion		0.51	0.5129	0.51581	0.52542	0.5352	0.54516	0.55531	0.56564	0.57617	0.5869	0.59782	0.609	0.62039	0.63199	0.64381	0.65585	0.66811	0.68061	0.69334	0.7063	0.71634	0.72653	0.73686	0.74734	0.75796	0.76874	0.77967	0.79076	0.802	0.81431	0.82681	0.8395
Rwanda		5.13984	5.30899	5.48328	5.66317	5.83374	5.98659	6.16171	6.3728	6.59722	6.81686	6.99932	7.14374	7.29857	7.59668	6.50553	5.47298	6.54646	7.64742	8.04184	8.22235	8.39841	8.61098	8.85737	9.09847	9.36125	9.61107	9.85722	10.14108	10.44077	10.74631	11.05598	11.37043
Saint Hele0		0.00647	0.00658	0.00664	0.00675	0.00749	0.00794	0.00831	0.00654	0.00659	0.00663	0.00668	0.00673	0.00678	0.00684	0.00689	0.00695	0.007	0.00706	0.00712	0.00718	0.00723	0.00728	0.00734	0.00739	0.00743	0.00748	0.00752	0.00756	0.0076	0.00764	0.00767	0.0077
Sao Tome and Principe		0.09407	0.09644	0.09824	0.10013	0.10212	0.10419	0.10635	0.1086	0.11094	0.11338	0.11593	0.1186	0.12091	0.12285	0.12492	0.12714	0.12953	0.13209	0.1348	0.13767	0.14069	0.14385	0.14713	0.15051	0.15397	0.15751	0.16111	0.16475	0.16842	0.1721	0.17581	0.17951
Senegal		5.61133	5.75446	5.90285	6.05554	6.2137	6.37841	6.54979	6.72784	6.91257	7.12729	7.34761	7.55397	7.75925	7.961	8.16615	8.37806	8.59491	8.80985	9.03714	9.25282	9.46928	9.7162	9.97244	10.24014	10.51912	10.80412	11.09611	11.3943	11.69834	12.00807	12.32325	12.6438
Seychelles		0.06395	0.0647	0.06528	0.06585	0.0665	0.06718	0.06784	0.06846	0.0692	0.07001	0.0708	0.07165	0.0725	0.07332	0.07413	0.07493	0.07571	0.07641	0.07717	0.07814	0.07916	0.08017	0.08113	0.08205	0.08297	0.08389	0.0848	0.0857	0.0866	0.08748	0.08834	0.08919
Sierra Leone		3.33503	3.40215	3.47225	3.54564	3.62254	3.70309	3.78739	3.87558	3.96778	4.06415	4.2282	4.3349	4.24628	4.09967	3.97796	3.88144	3.8105	3.76521	3.74573	3.73557	3.80906	4.04341	4.28683	4.46568	4.6022	4.70805	4.81762	4.91833	5.023	5.13214	5.2457	5.36367
Somalia		5.79356	5.8288	5.8345	6.01035	6.21774	6.45854	6.71493	6.93908	6.91829	6.76633	6.69204	6.46448	6.11621	6.10102	6.26444	6.40072	6.57426	6.75108	6.99166	7.24166	7.50056	7.76577	8.01676	8.27177	8.53664	8.79016	9.00859	9.23811	9.45476	9.61321	9.76789	9.92564
South Africa		29.25159	30.16868	31.14003	32.14396	33.18159	34.25409	35.10138	35.9477	36.79488	37.63933	38.47627	39.29952	40.09107	40.94061	41.66156	42.22792	42.79396	43.35363	43.96192	44.52627	45.0641	45.57622	46.07695	46.56663	47.03287	47.48345	47.92567	48.36713	48.78276	49.05249	49.10911	49.00403
Sudan and South Sudan		19.45078	20.21155	21.0064	21.70901	22.25525	22.82642	23.4234	24.04714	24.69861	25.37882	26.08881	26.82968	27.60256	28.37303	29.03296	29.70972	30.40379	31.11568	31.84588	32.59493	33.36337	34.15176	34.96068	35.79073	36.64253	37.5167	38.41392	39.29106	40.31773	41.4801	42.58099	43.69745
Swaziland		0.61146	0.63131	0.64981	0.67241	0.69634	0.72157	0.74942	0.77759	0.81499	0.8493	0.8816	0.92247	0.95902	0.98872	0.99492	1.00364	1.03245	1.06106	1.0894	1.11714	1.14393	1.16952	1.19371	1.21644	1.23795	1.25898	1.2798	1.29991	1.3191	1.33719	1.35405	1.37042
Tanzania		18.65345	19.18772	19.73408	20.30176	20.88673	21.484	22.10567	22.78816	23.47749	24.13786	24.80477	25.50356	26.24031	27.11459	28.15991	29.06455	29.6744	30.37657	31.26357	32.18724	33.1933	34.19057	35.22678	36.30671	37.38243	38.48614	39.61806	40.78796	41.96741	43.09472	44.2882	45.59086
Togo		2.62551	2.71957	2.8166	2.9175	3.02179	3.12943	3.24072	3.35592	3.47514	3.59714	3.72079	3.84605	3.97281	3.95258	3.98199	4.20291	4.40207	4.57245	4.71517	4.85245	4.99183	5.13457	5.27793	5.42496	5.57821	5.71452	5.8654	6.04238	6.22035	6.40501	6.58724	6.77199
Tunisia		6.44318	6.60571	6.7341	6.85989	7.18453	7.3637	7.547	7.72769	7.89783	8.05491	8.207	8.36104	8.51448	8.66619	8.81166	8.94655	9.07299	9.19313	9.30414	9.40737	9.50799	9.60957	9.71022	9.81165	9.91368	10.01291	10.11197	10.21286	10.31584	10.42055	10.52504	10.62919
Uganda		12.01971	12.29571	12.61766	12.97433	13.38435	13.81099	14.27111	14.81129	15.39726	15.98565	16.54896	17.12577	17.7353	18.40414	19.09025	19.64027	20.19744	20.8131	21.46131	22.19062	22.91608	23.63761	24.39105	25.20012	26.04698	26.91658	27.81069	28.7102	29.59863	30.52092	31.50723	32.56022
Western Sahara		0.12404	0.13909	0.15455	0.16568	0.1724	0.17933	0.18648	0.19385	0.20143	0.20926	0.21737	0.22575	0.2344	0.2433	0.25244	0.26387	0.27767	0.29184	0.30635	0.32118	0.3363	0.35169	0.36739	0.3834	0.39974	0.4154	0.43032	0.4454	0.46063	0.47601	0.49152	0.50716
Zambia		5.54036	5.7115	5.91251	6.13271	6.33956	6.53543	6.75716	6.98553	7.19486	7.39671	7.60338	7.81778	8.03505	8.25252	8.47128	8.6901	8.91542	9.16924	9.42865	9.69259	9.98388	10.28461	10.55841	10.8199	11.08825	11.37246	11.67831	12.00069	12.33773	12.67812	13.04188	13.4246
Zimbabwe		7.16997	7.42922	7.63652	7.92834	8.24121	8.56049	8.87678	9.21648	9.56005	9.8682	10.15604	10.43742	10.72025	10.97637	11.08648	11.15949	11.31695	11.46939	11.60692	11.73308	11.82003	11.86786	11.86602	11.81552	11.73505	11.63947	11.54433	11.44319	11.35011	11.39263	11.65186	12.0843
Afghanistan		15.04429	13.67623	12.58276	12.43928	12.76866	13.11994	13.12592	13.05645	13.16873	13.50272	13.56828	13.67192	15.02332	17.00344	18.48604	19.44501	20.11051	20.76936	21.45155	22.20567	22.46135	22.50746	23.60009	25.00539	25.69764	26.3347	27.15439	27.38708	27.70572	28.48363	29.12073	29.75757
American Samoa		0.03242	0.0336	0.03471	0.03584	0.03709	0.03863	0.04016	0.04188	0.04362	0.04538	0.0472	0.04857	0.04995	0.05138	0.05273	0.05391	0.05496	0.05597	0.05693	0.05785	0.05777	0.05761	0.0574	0.05718	0.05709	0.05695	0.05665	0.05635	0.05605	0.05575	0.05547	0.0552
Australia		14.6159	14.92326	15.16178	15.34807	15.51048	15.69524	15.90042	16.13672	16.40073	16.6806	16.95624	17.20212	17.41893	17.6078	17.78109	17.97563	18.19585	18.41526	18.62084	18.83025	19.05319	19.29426	19.53494	19.76654	19.99508	20.23235	20.48947	20.74963	21.00731	21.26264	21.51575	21.76671
Bangladesh		87.93733	94.14314	96.18533	98.23486	100.27995	102.30835	104.34543	106.38194	108.37452	110.31623	112.21257	113.91068	115.75094	117.62067	119.51509	121.44231	123.43252	125.50582	127.66013	129.87906	132.15077	134.47753	136.86984	139.30503	141.7344	144.13874	146.51711	148.89374	151.28999	153.70033	156.11846	158.57054
Bhutan		0.44604	0.46195	0.47824	0.49489	0.51189	0.5292	0.54681	0.56472	0.58289	0.59961	0.61474	0.62504	0.60166	0.57669	0.57472	0.56631	0.56533	0.57484	0.58527	0.59563	0.60587	0.61598	0.62594	0.63576	0.64541	0.6549	0.66421	0.67335	0.68232	0.69114	0.69985	0.70843
Brunei		0.18522	0.19283	0.19886	0.20495	0.21122	0.21784	0.22473	0.23182	0.23888	0.24585	0.25289	0.25925	0.26576	0.27311	0.2805	0.28799	0.29557	0.30311	0.31053	0.3179	0.3253	0.33265	0.33999	0.34726	0.35431	0.36111	0.36782	0.37458	0.38137	0.38819	0.39503	0.40189
Burma (Myanmar)		33.33642	33.98181	34.64219	35.32599	36.03536	36.76587	37.51768	38.28766	39.02532	39.73446	40.46361	41.18056	41.79115	42.43742	43.21759	43.99398	44.72671	45.42617	46.11082	46.78168	47.43887	48.08106	48.71575	49.34468	49.9622	50.57209	51.16167	51.75584	52.22815	52.82612	53.41437	53.9998
Cambodia		6.88852	7.0792	7.29713	7.53065	7.69058	7.84124	8.10142	8.40395	8.71641	9.03814	9.36752	9.70681	10.14276	10.62423	10.97424	11.23414	11.48458	11.72171	11.94447	12.15466	12.35115	12.53961	12.7292	12.92071	13.10994	13.2974	13.49871	13.71869	13.95701	14.20623	14.45368	14.70172
Chi0		984.73646	997.00072	1012.49049	1028.35653	1042.75605	1058.00772	1074.52256	1093.72571	1112.86641	1130.72941	1148.36447	1163.61039	1177.53561	1190.76183	1203.80174	1216.37844	1227.88219	1238.12566	1247.50222	1255.9925	1263.63753	1270.74423	1277.59472	1284.30332	1291.0018	1297.76532	1304.26188	1310.58354	1317.06568	1323.59158	1330.14129	1336.71801
Cook Islands		0.01801	0.01765	0.01744	0.01749	0.01774	0.01749	0.01765	0.01767	0.01791	0.01815	0.01839	0.01864	0.01858	0.01851	0.01842	0.01831	0.01818	0.01787	0.01738	0.01686	0.01631	0.01573	0.01515	0.0146	0.01409	0.0136	0.01313	0.01269	0.01227	0.01187	0.01149	0.01112
Fiji		0.63451	0.64677	0.65891	0.67191	0.68557	0.69894	0.71299	0.71967	0.72637	0.73303	0.73962	0.74617	0.75274	0.75933	0.76592	0.77252	0.77889	0.78561	0.79269	0.79908	0.80493	0.81073	0.81667	0.82318	0.82982	0.83656	0.84395	0.85211	0.86054	0.8685	0.87598	0.88313
French Polynesia		0.1509	0.15569	0.16042	0.16532	0.17027	0.17541	0.18064	0.18583	0.19116	0.19577	0.19953	0.20326	0.20683	0.21032	0.21368	0.21684	0.21986	0.22339	0.22745	0.23157	0.23587	0.2401	0.24419	0.24775	0.2508	0.25376	0.2568	0.25984	0.26288	0.26592	0.26882	0.27169
Guam		0.10687	0.10917	0.10928	0.11408	0.1173	0.12062	0.12288	0.12572	0.12755	0.13095	0.13413	0.13816	0.14233	0.14383	0.14316	0.14419	0.14532	0.1468	0.14972	0.15259	0.15532	0.15634	0.15706	0.15758	0.15802	0.1584	0.15871	0.15897	0.15917	0.15932	0.15943	0.1596
Hawaiian Trade Zone		0	0	0	0	0	0	0	0	0	0	0	0	0	0	0	0	0	0	0	0	0	0	0	0	0	0	0	0	0	0	0	0
Hong Kong		5.0631	5.1834	5.2645	5.3451	5.3979	5.4562	5.5246	5.58451	5.62841	5.66072	5.68796	5.752	5.8297	5.93451	6.06729	6.22535	6.39156	6.49592	6.54456	6.59931	6.65872	6.71338	6.76248	6.80974	6.85513	6.89869	6.94043	6.98041	7.01864	7.05507	7.08971	7.12251
India		684.8877	699.15377	713.71094	728.52155	744.01697	759.61221	775.06324	790.64043	806.3794	822.21883	838.15883	853.72439	870.11319	886.74371	903.57929	920.58497	937.72548	954.92605	972.11281	989.25019	1006.3003	1023.29508	1040.28482	1057.25112	1074.15902	1090.97303	1107.62435	1124.1348	1140.56621	1156.89777	1173.10802	1189.17291
Indonesia		150.87866	154.04034	157.21405	160.3946	163.57042	166.71812	169.82297	172.9165	176.03815	179.18505	182.33887	185.51485	188.70448	191.89548	195.14222	198.47091	201.87993	205.18251	208.42599	211.68037	214.85766	218.03563	221.18809	223.34763	226.40309	229.24475	232.19925	235.09899	237.93881	240.71469	243.42274	246.06516
Japan		116.80731	117.64809	118.45497	119.26995	120.0347	120.75434	121.49191	122.09133	122.613	123.1075	123.5374	123.96254	124.37869	124.73816	125.04655	125.32706	125.61671	125.92456	126.23662	126.51286	126.77561	127.1086	127.37138	127.55225	127.69375	127.71536	127.72757	127.77904	127.78774	127.70429	127.57915	127.46954
Kiribati		0.05754	0.05845	0.05935	0.06025	0.06115	0.06203	0.06377	0.06559	0.06748	0.06939	0.07129	0.07266	0.07363	0.07467	0.07561	0.07654	0.0779	0.07969	0.08153	0.08334	0.08512	0.08676	0.08826	0.0897	0.09112	0.09259	0.09406	0.09548	0.09686	0.09819	0.09948	0.10074
Korea, North		17.39046	17.67467	17.95219	18.23708	18.52995	18.83068	19.13745	19.44869	19.76891	20.10294	20.45148	20.81256	21.18194	21.56295	21.85159	22.10725	22.32357	22.44328	22.4828	22.59431	22.78497	22.97736	23.16503	23.33047	23.47673	23.62092	23.76438	23.90767	24.05064	24.19092	24.3257	24.45749
Korea, South		38.124	38.723	39.326	39.91	40.406	40.806	41.214	41.622	42.031	42.449	42.869	43.33991	43.83712	44.30704	44.7189	45.10508	45.46797	45.80783	46.15151	46.48542	46.83884	47.17781	47.43728	47.65663	47.85385	48.00516	48.12356	48.25015	48.37939	48.50897	48.63607	48.75466
Laos		3.29316	3.33698	3.41116	3.49496	3.57671	3.65717	3.76177	3.86931	3.97988	4.09357	4.21045	4.33063	4.45418	4.58122	4.71183	4.84612	4.94763	5.0549	5.16765	5.28581	5.39741	5.49852	5.57803	5.654	5.74604	5.83636	5.93079	6.03541	6.14518	6.25687	6.36816	6.47721
Macau		0.25577	0.26093	0.27081	0.28545	0.29898	0.30584	0.3122	0.32298	0.33214	0.34124	0.35176	0.36386	0.37533	0.3844	0.39294	0.4013	0.4104	0.41699	0.42161	0.42777	0.43174	0.43478	0.43898	0.44418	0.45523	0.47403	0.49943	0.52553	0.54567	0.55985	0.56796	0.573
Malaysia		13.46009	13.87521	14.30829	14.75262	15.19792	15.64911	16.11117	16.5789	17.05511	17.47198	17.88222	18.37607	18.86191	19.33822	19.83502	20.33903	20.85669	21.40715	21.97723	22.55341	23.15128	23.73736	24.28261	24.8804	25.47547	25.96812	26.43216	26.89556	27.35776	27.81787	28.27473	28.72861
Maldives		0.15287	0.15725	0.1619	0.16685	0.1721	0.1773	0.18461	0.19221	0.20008	0.2082	0.21661	0.22722	0.23785	0.24691	0.25338	0.26058	0.27053	0.27571	0.28118	0.29148	0.29998	0.30591	0.31186	0.31849	0.3266	0.33625	0.34812	0.36497	0.38593	0.39633	0.39565	0.395
Mongolia		1.66238	1.70883	1.75603	1.805	1.85569	1.9077	1.9608	2.01513	2.07072	2.1606	2.21754	2.27038	2.31795	2.35969	2.40065	2.44704	2.49485	2.53922	2.58152	2.62305	2.66376	2.70447	2.74455	2.78408	2.82457	2.86599	2.9084	2.95179	2.99608	3.04114	3.08692	3.13332
0uru		0.00771	0.00785	0.008	0.00815	0.00833	0.00852	0.00871	0.00891	0.0091	0.0093	0.00949	0.00967	0.00983	0.00982	0.00982	0.00982	0.00983	0.00987	0.00989	0.00987	0.00986	0.00989	0.00992	0.00993	0.00997	0.01001	0.00957	0.00912	0.00916	0.00921	0.00927	0.00932
Nepal		14.66525	15.01086	15.37507	15.75685	16.15506	16.56998	17.00221	17.45269	17.92208	18.41093	18.91826	19.44833	20.03337	20.64137	21.24674	21.87667	22.50257	23.10934	23.70029	24.26987	24.81816	25.33561	25.81505	26.27538	26.70832	27.09387	27.45895	27.82789	28.19696	28.56338	28.95185	29.39188
New Caledonia		0.1394	0.1425	0.145	0.14658	0.14966	0.15259	0.15558	0.15873	0.16194	0.16512	0.1689	0.17333	0.17776	0.18246	0.18745	0.19178	0.19553	0.19938	0.20324	0.20718	0.21119	0.21528	0.21944	0.22369	0.22802	0.2324	0.23651	0.24045	0.24445	0.24841	0.25235	0.25627
New Zealand		3.17015	3.18545	3.2169	3.25845	3.29809	3.32381	3.34063	3.35249	3.36131	3.37754	3.41368	3.4552	3.49355	3.53664	3.5863	3.64218	3.69701	3.73842	3.76431	3.78376	3.8024	3.83788	3.89846	3.96028	4.00817	4.04822	4.08996	4.13234	4.17346	4.21342	4.25228	4.29035
Niue		0.002	0.002	0.002	0.002	0.002	0.002	0.002	0.002	0.002	0.002	0.002	0.002	0.002	0.002	0.002	0.002	0.002	0.002	0.002	0.002	0.002	0.00212	0.00213	0.00215	0.00216	0.00198	0.00182	0.00166	0.00153	0.0014	0.0014	0.0014
Pakistan		85.21912	90.97508	94.09612	96.88143	99.35434	102.07865	105.23962	108.58408	112.02109	115.41922	118.81619	122.24818	124.96177	127.56273	130.74625	134.18537	137.91117	141.4455	144.88529	148.3792	152.42904	156.79544	160.26923	163.16564	166.22361	169.27864	172.38187	175.49508	178.47939	181.45728	184.40479	187.34272
Papua New Guinea		2.8464	2.91716	2.991	3.0676	3.1469	3.22893	3.31375	3.40147	3.49213	3.58588	3.68283	3.78309	3.8866	3.99325	4.1031	4.21589	4.33107	4.44837	4.5678	4.68932	4.81279	4.93745	5.0626	5.18811	5.31389	5.43977	5.56556	5.69109	5.81623	5.94078	6.06452	6.18759
Philippines		50.94018	52.2276	53.55718	54.88541	56.25788	57.70569	59.18595	60.64811	62.08071	63.55467	65.08772	66.57223	67.97776	69.41697	70.94455	72.59743	74.33582	76.05706	77.74055	79.44813	81.22208	83.09528	84.93641	86.75169	88.62179	90.43579	92.26694	94.15747	96.06168	97.9766	99.90018	101.83394
Samoa		0.15904	0.16092	0.16074	0.16066	0.16066	0.16074	0.16086	0.1611	0.16152	0.1621	0.16283	0.16369	0.1648	0.16612	0.16748	0.16889	0.17033	0.17181	0.17331	0.17476	0.17621	0.17779	0.17943	0.18109	0.18277	0.18449	0.18625	0.18796	0.1895	0.1909	0.192	0.19316
Singapore		2.4139	2.53537	2.65187	2.68926	2.7433	2.7499	2.75007	2.79455	2.86927	2.95775	3.0471	3.15203	3.25601	3.36025	3.46415	3.56668	3.66847	3.76976	3.86848	3.96508	4.06333	4.16948	4.28121	4.39062	4.49823	4.60574	4.71356	4.82192	4.93061	5.0359	5.14011	5.24679
Solomon Islands		0.23077	0.23874	0.24693	0.25535	0.26401	0.27293	0.28212	0.29154	0.30118	0.31104	0.32113	0.33147	0.34204	0.35284	0.36385	0.37507	0.38649	0.39809	0.40984	0.42172	0.43373	0.44591	0.45822	0.47065	0.48317	0.49575	0.50838	0.52107	0.53378	0.54649	0.5592	0.57189
Sri Lanka		15.05597	15.31549	15.51455	15.63714	15.7142	15.84702	16.06984	16.28754	16.48023	16.68749	16.86168	17.00337	17.20286	17.44871	17.70882	17.94107	18.1508	18.36745	18.5698	18.79287	19.04117	19.26306	19.47873	19.70872	19.93359	20.10299	20.31105	20.50759	20.69751	20.8792	21.08383	21.28391
Taiwan		17.84832	18.17743	18.50139	18.80339	19.08335	19.33736	19.55558	19.7578	19.9761	20.20754	20.27825	20.49209	20.6872	20.88606	21.09325	21.29041	21.45771	21.63853	21.83444	22.00781	22.18455	22.34141	22.46193	22.56145	22.64641	22.72755	22.81727	22.90937	22.98702	23.0651	23.12658	23.17427
Thailand		47.02576	47.9365	48.82716	49.69425	50.53378	51.34181	52.12948	52.91034	53.68343	54.44569	55.19672	55.93939	56.6834	57.42207	58.15361	58.88276	59.58796	60.24759	60.87985	61.43199	61.90427	62.38007	62.85695	63.324	63.78395	64.23528	64.67749	65.10989	65.53104	65.93991	66.33626	66.72015
Timor-Leste (East Timor)		0	0	0	0	0	0	0	0	0	0	0	0	0	0	0	0	0	0	0	0	0	0	0	0.95597	0.97146	0.9842	0.99959	1.01755	1.03816	1.06153	1.08767	1.11542
Tonga		0.09181	0.09233	0.09288	0.09342	0.09379	0.09438	0.09489	0.09535	0.0957	0.09599	0.09624	0.09647	0.09671	0.09695	0.09718	0.0974	0.0976	0.09805	0.09875	0.09944	0.10013	0.1008	0.10145	0.10209	0.1027	0.1033	0.10387	0.10441	0.10488	0.10529	0.10563	0.10592
U.S. Pacific Islands		0	0	0	0	0	0	0	0	0	0	0	0	0	0	0	0	0	0	0	0	0	0	0	0	0	0	0	0	0	0	0	0
Vanuatu		0.11679	0.12026	0.12379	0.12738	0.13103	0.13473	0.13848	0.14227	0.14612	0.15	0.15387	0.15769	0.16147	0.1652	0.16886	0.17245	0.17599	0.17949	0.18294	0.18634	0.19138	0.19651	0.20173	0.20703	0.21241	0.21785	0.22333	0.22882	0.2343	0.23978	0.24525	0.25072
Viet0m		53.7152	54.90268	56.14218	57.43635	58.76204	60.09307	61.43983	62.82649	64.21135	65.86848	67.25811	68.63827	69.97972	71.28515	72.55954	73.78339	74.94655	76.05286	77.1075	78.14167	79.17798	80.20948	81.25796	82.29659	83.35245	84.42493	85.47054	86.51885	87.55836	88.57676	89.57113	90.54939
Wake Island		0	0	0	0	0	0	0	0	0	0	0	0	0	0	0	0	0	0	0	0	0	0	0	0	0	0	0	0	0	0	0	0
World		4448.08393	4530.874	4610.79463	4691.80463	4770.40823	4852.05209	4935.96018	5022.43934	5109.56034	5196.15468	5284.88456	5367.89295	5452.8487	5535.2427	5619.43962	5700.4657	5780.87755	5859.57347	5937.05612	6014.15936	6090.86856	6167.65964	6244.44428	6320.9269	6397.8415	6474.66202	6552.41803	6630.84486	6707.59554	6785.7895	6863.18955	6940.14288
