# Supplementary material
Source: MDPI journal article supplement (https://www.mdpi.com/1099-4300/15/12/5565)
Supplement: s2 [file s2 › Sources/Figure 2/README.txt]

Figure 2a and 2b are plotted by Qin Liu (qinliu.christoph@gmail.com).

Figure_2a.csv is the global energy consumption data, which is the same file with Global_ectot.csv appears in other folders.
Figure_2b.csv is the global population data, which is the same file with Global_pop.csv appears in other folders.
