# Supplementary material
Source: MDPI journal article supplement (https://www.mdpi.com/1099-4300/15/12/5565)
Supplement: s2 [file s2 › Sources/Figure 3a/Figure 3a.csv]

2010 Energy consumption per capita (KiloWatts per Capita)	2010 Cumulative fraction of world population
0.0115423324032149	0.998463736536392
0.0158637875236234	0.997026603859531
0.0287958383307241	0.994901805079335
0.0368622473991451	0.993290863497693
0.0385058850990337	0.991867606566521
0.0401545787104405	0.989642646846035
0.0404567821742868	0.988798564967846
0.0420247495835853	0.988092621288756
0.0527958182189727	0.985055107925428
0.0531474897472692	0.972517989212902
0.0534991894376304	0.970151432192165
0.0540805283624683	0.959973560344321
0.0662491749474025	0.957722740418597
0.0663200954193688	0.953131893932862
0.068316153244977	0.952594949346884
0.0792428450905315	0.951090658527154
0.0805340406557136	0.950932176616902
0.0880663060103099	0.950829289485266
0.090715892946654	0.944376157066785
0.097417190265907	0.94015764916152
0.10730942012163	0.938751727077187
0.117191414006473	0.937791915389372
0.118981688422048	0.93756386387357
0.119917215330797	0.933320748849414
0.128935669283265	0.933064964784238
0.129635171664411	0.932300625824252
0.141516274056157	0.930194613139737
0.15068968799969	0.922411727344882
0.150921983043319	0.898864669964493
0.172951832460733	0.89858497672038
0.179361587982833	0.898503496966215
0.179970966482988	0.892552336367985
0.196561044788877	0.889483906741712
0.211797959895326	0.866736242683356
0.216375362998629	0.86392493617616
0.235054479946443	0.862129343578672
0.237511136654858	0.861201453537034
0.23856371049949	0.861165718719958
0.241767261869675	0.85496133996941
0.24827158610026	0.854889721713389
0.269612187826894	0.851623326300284
0.271864333188678	0.850303795777186
0.276116706404426	0.84686929008803
0.29103377159866	0.846402288119352
0.292387515078408	0.846387793115875
0.322944790354389	0.845504145764786
0.35168804420835	0.843603843232149
0.361242323145273	0.840531766541772
0.362816340974325	0.840457650855517
0.370822763210284	0.840432033982163
0.372146947862144	0.839831852247924
0.407399948828921	0.825275625303274
0.426909323880211	0.825078329771931
0.429492563212481	0.821654874555872
0.431420489075645	0.82083826295317
0.464077509971406	0.793969062387961
0.469317134966118	0.791485784745136
0.469651492551404	0.789788018850347
0.499753697916667	0.789760042969089
0.526447791363232	0.787785639320968
0.545099737755458	0.78718446094596
0.552291322774369	0.786020340814483
0.566661016949152	0.78601922323631
0.62470348928311	0.615088334325909
0.687325284283368	0.614206502492947
0.696093376961974	0.601155297820755
0.71137843574391	0.596546937267691
0.752607065210052	0.596439036333585
0.781694865603342	0.594989620496359
0.797606361829026	0.594974229390436
0.831638917424066	0.559505658193381
0.85066168101727	0.558414673135238
0.893857005867714	0.558287036091151
0.979337987430552	0.554069093531819
0.981957625814249	0.55253551400432
0.982648262601291	0.552524905025599
0.982916266518256	0.552299748722092
0.984426585584834	0.550868342358426
1.00233339122767	0.550759281590909
1.0043156576782	0.550309493531669
1.01691239685281	0.550294307873623
1.02695811545382	0.549984173373717
1.03361406406337	0.543543121581877
1.06253116458545	0.54299936953146
1.12594155933848	0.539454927371421
1.19403571428571	0.53945472338062
1.20487393791188	0.537837597963559
1.21956071339796	0.537814150678079
1.2240968112314	0.537518464555181
1.23102402151734	0.537502754349361
1.23287620371541	0.537445105091966
1.24612072149	0.536656757871799
1.27254900304991	0.534501651886907
1.32873108228412	0.53445582389642
1.37403237827082	0.522730451605996
1.3856696396544	0.522072403509867
1.39455859703575	0.521402027083981
1.40013524498234	0.520966805424998
1.49080112249449	0.520551942047939
1.55473674290289	0.517317506165017
1.67239073660072	0.512079332756814
1.69035377385993	0.507755950266681
1.70460507188131	0.506822387823703
1.7257742060119	0.506633827469867
1.74863642675307	0.506627531439507
1.77091126855601	0.506623212662837
1.80656871962814	0.50654045650909
1.92899485340124	0.478005904187345
1.92930422874778	0.466669243653312
1.94506423466162	0.466367324154371
1.99724513017555	0.465011999074033
2.10184398482256	0.464972829926117
2.10389205500659	0.464852357330371
2.1424554448847	0.46437136450691
2.16526573675593	0.447983783920308
2.16980585337953	0.444784147410933
2.17966318978489	0.43511844255215
2.19575174953285	0.435038906538902
2.23716024968184	0.434437825788062
2.25890740416594	0.434396204379304
2.27297628593363	0.434327879117639
2.2942277570136	0.433398871497828
2.38287786660267	0.433301723793081
2.38858658487259	0.432869438144553
2.3939983847549	0.428809184845504
2.42415139068608	0.428486009505115
2.4723098648359	0.42796942902937
2.4924	0.427962158214397
2.51335154137372	0.427954075807452
2.53564730970798	0.234142227964039
2.65991423158849	0.231700181233296
2.70802512674394	0.225676158035159
2.71361059671385	0.225179195646146
2.71390830892334	0.225077222101882
2.73453126764097	0.225053991920898
2.7976008751834	0.224487932019331
2.93884508268059	0.224486257837687
2.94750289956495	0.223832484805913
2.97273719211823	0.223773327473668
3.02907189060126	0.223739763701544
3.50574438722141	0.222175479187286
3.51730494758985	0.220719518159507
3.52489609213261	0.215115061783466
3.52571726856233	0.214044860473775
3.53369196345995	0.209925014176414
3.56269282311357	0.209830202166336
3.5986544352261	0.208788568311226
3.62656518731988	0.208775928166959
3.68263882540719	0.208615259183907
3.74964379684514	0.201997855887662
3.80767991906186	0.194842279689403
3.90703916293994	0.193431818809752
3.9492831181253	0.192889497609095
3.95848948771049	0.181681179344489
4.07848942539148	0.177714544709333
4.17308370093228	0.176148195516755
4.19686749223896	0.167296601916285
4.29787845917658	0.16622506883808
4.41310465138058	0.163735678756616
4.48552972952284	0.156959401596366
4.54249730257067	0.156285806487058
4.59586385744866	0.155395479894318
4.67680020506811	0.155385532428623
4.71855299791054	0.154588466058797
4.77994394936843	0.145503815882519
4.84920747681423	0.145488576312619
5.03430455002012	0.14468491375454
5.07890944079692	0.144672041935007
5.16614739359206	0.144380168983007
5.17967886884108	0.144371770390321
5.18041704839673	0.144364454405956
5.21460823136513	0.142877986553911
5.24171024063396	0.142832754507979
5.44395432350132	0.141700625962383
5.67619598979563	0.132238246020185
5.67970164454131	0.132201476678333
5.70568423421852	0.113612210264544
5.70701407664575	0.101715984021797
5.7740070401264	0.101527850591566
5.95532577637167	0.100494825148251
6.21542936952774	0.0992979586649302
6.2463409567449	0.0985780285022883
6.74135354680313	0.0979584385004264
6.86671043771044	0.0979575729966
6.87810561192308	0.0771903040876006
6.98231401746389	0.0738205829626376
7.13379299363057	0.0738201254404128
7.41215334832769	0.0667334748196043
7.42804117407256	0.0667263263991119
7.509365234375	0.0667255803756117
8.18701477839027	0.0654034198282596
8.29044648881937	0.0646377155869857
8.54759546925566	0.0646363648764687
8.57913941539445	0.0645770953492839
8.60584297905615	0.0621621589959729
8.81434378600641	0.0606433760869202
9.03034020101554	0.0575083653203294
9.76734507635491	0.0570759456207035
10.1980356982688	0.0533266267569156
10.5964636259917	0.00825482725506754
12.5080704503455	0.00819726833645551
12.8748939346097	0.00327821376585935
13.354653736383	0.0032057183493942
13.3577286108064	0.00252434390518863
15.7971548284862	0.00235239714500424
16.872742486739	0.00198183765573379
21.4768239515665	0.00173129761121615
21.9322941240557	0.000982343928845775
22.2323876209899	0.00093733335863988
23.7606193355964	0.000212351509522701
24.0283697581879	0.000179029612205173
25.4753533600827	0
