# Supplementary material
Source: MDPI journal article supplement (https://www.mdpi.com/1099-4300/15/12/5565)
Supplement: s2 [file s2 › Sources/Figure 3b/Global_ecpercap.csv]

		1980	1981	1982	1983	1984	1985	1986	1987	1988	1989	1990	1991	1992	1993	1994	1995	1996	1997	1998	1999	2000	2001	2002	2003	2004	2005	2006	2007	2008	2009	2010	2011
Bermuda		144.99507	124.85659	131.74304	138.84985	134.69285	131.85953	123.82718	173.92252	188.9909	228.79749	160.53691	138.57255	110.23853	117.25706	124.38382	122.59727	123.24501	122.41823	121.36946	120.34428	118.96492	117.04571	117.20732	125.76214	133.05066	140.64392	138.71009	152.11966	145.63108	143.1295	139.8506	0
Ca0da		398.35478	385.12116	365.30462	361.00634	380.69733	391.35332	391.32617	398.71649	411.00785	409.10717	395.13149	395.41107	401.51159	404.25024	409.93087	411.39024	418.0711	417.37619	404.07896	420.77178	427.81451	410.25348	413.90891	424.14428	439.22021	437.60444	423.13868	425.8522	407.8635	391.10771	385.0955	396.54812
Greenland		157.53692	146.15335	139.70256	96.94705	151.90734	134.32146	86.04597	61.99515	141.72183	121.09299	141.54832	140.31618	123.89525	127.33865	128.5979	127.99823	129.24865	131.95518	133.61064	133.41504	135.70245	139.36854	140.31681	140.64	140.95177	143.42677	146.85465	143.55009	159.34193	155.0137	155.01426	0
Mexico		54.40504	58.73276	60.30758	55.19914	55.52967	57.34561	55.15554	55.72029	55.48931	57.41821	54.83954	57.45279	57.5832	57.3229	58.56845	56.66276	58.06273	58.87694	61.0898	61.42233	63.36589	62.13628	61.34443	61.81538	61.22213	63.37564	67.89806	69.24229	66.04992	62.47212	64.76434	68.65647
Saint Pierre and Miquelon		366.44407	366.97705	335.70365	363.18736	354.11553	310.76473	385.89639	489.64025	508.46265	579.01861	567.22395	537.84276	499.80162	272.68993	285.23787	189.84663	189.18022	129.41915	149.85835	149.7884	163.57035	151.0813	152.0357	166.90575	181.25675	188.57905	191.65624	200	202.5936	203.82594	205.64367	0
United States		343.56604	331.66502	315.53909	312.11742	324.95187	321.07928	319.18583	326.28178	338.2804	343.51436	338.45128	333.7721	334.41799	336.34991	338.5885	341.85672	349.01339	346.97708	344.44987	346.37296	350.20433	337.46873	339.48731	337.72815	342.07639	339.34306	333.90131	336.27305	326.45997	308.23956	316.94623	312.14689
Antarctica		0	0	0	0	0	0	0	0	0	0	0	0	0	0	0	0	0	0	0	0	0	0	0	0	0	0	0	0	0	0	0	0
Antigua and Barbuda		87.26986	77.84484	104.48771	63.25815	72.91764	71.52396	71.75434	87.59687	90.06309	90.36875	94.82585	93.64953	91.7373	88.70782	97.9894	98.81747	96.65545	98.71985	96.91856	95.30142	96.27062	94.80757	93.8928	98.11036	104.24747	111.84012	112.60531	106.83264	115.13057	110.09229	108.50278	0
Argenti0		57.82593	55.36829	57.03772	56.8246	60.77123	56.78955	60.92196	61.71267	60.95879	59.55942	56.72928	58.84756	60.27095	57.26359	64.36715	65.53751	67.10031	68.2506	70.52149	70.53042	71.48013	69.30477	65.31318	69.56101	71.78019	75.41631	79.14387	81.73482	82.793	80.69791	80.99859	0
Aruba		0	0	0	0	0	0	24.37519	24.63346	93.45205	123.07632	124.82871	129.39173	132.60517	120.12491	133.59398	150.21145	95.09214	146.57367	144.82043	143.10872	149.87734	148.67557	146.74152	153.85148	152.10326	153.37754	162.12541	146.08044	138.57259	140.56015	145.04041	0
Bahamas, The		285.58352	296.39161	249.15641	184.03764	163.35807	145.54466	141.4933	154.46796	142.18925	159.48162	167.93008	146.41411	120.70441	115.0592	138.61511	160.41347	177.68366	174.3077	194.19146	173.05945	168.04827	163.11071	162.52653	194.26011	194.52535	221.77358	220.22079	207.75534	233.28277	158.25419	156.78903	0
Barbados		57.39445	60.62922	60.24835	63.29602	60.72218	66.65112	70.71065	66.78359	63.29631	67.90717	70.15168	70.51443	70.94598	66.8755	67.5039	68.90067	61.02228	75.28968	77.32185	78.88236	86.87332	83.40615	83.00998	84.14113	57.36598	77.13373	73.26884	66.0658	61.58353	72.1578	67.56285	0
Belize		25.72097	23.02922	21.18881	20.70694	21.84939	21.27279	24.55966	19.73053	14.4692	19.39366	25.91541	27.99323	23.60917	21.43423	21.21891	25.40986	22.21583	32.76631	31.78853	31.76086	43.28725	56.20207	52.66602	52.59665	55.08596	56.80323	59.33974	59.46424	59.14297	38.75819	39.7346	0
Bolivia		13.6992	15.03987	13.06344	13.18067	12.54425	11.27959	11.3129	10.89337	12.35916	13.60455	14.08431	13.53607	14.21478	11.96014	15.00859	16.72193	16.0889	17.60281	15.9851	17.58976	19.75822	17.30593	18.37894	22.74923	22.72193	22.06882	24.42627	24.73753	25.99485	23.50449	23.38116	0
Brazil		33.22044	31.32595	31.0759	30.36419	32.44759	33.83605	35.85697	36.16362	36.67557	37.11214	38.51369	39.46127	39.34533	31.92072	41.52266	43.35913	45.34514	47.08871	47.90475	48.06583	48.95297	47.78927	47.73233	47.7222	48.93927	50.29547	51.55814	53.26267	53.80871	53.73975	57.69735	58.99576
Cayman Islands		84.53343	86.43424	83.54034	78.85361	77.47253	76.36957	74.56152	73.89905	156.07917	154.67413	150.38498	153.43366	150.0053	128.47793	142.11746	148.77117	144.16764	139.62931	137.48401	133.09905	127.50217	125.12742	121.49969	122.33775	127.73378	130.37873	144.38717	162.15846	193.31155	157.8063	155.00887	0
Chile		38.79403	37.53505	32.86614	32.80249	33.34891	33.37313	32.02582	33.24524	35.73696	39.61361	43.9299	43.06187	45.71445	45.22697	50.59317	55.06714	58.55781	65.45481	63.20634	65.91084	66.73778	68.19708	68.62453	71.40069	75.59545	80.06182	81.611	67.00815	81.9196	78.25954	79.55941	80.27307
Colombia		26.14817	26.28961	27.55848	27.36409	29.30622	29.02572	29.62113	26.50746	28.93606	29.35927	26.84516	28.5679	28.2773	28.41105	30.64766	29.95979	32.06342	32.63065	32.50872	30.57816	30.1208	29.5959	29.14593	29.80082	29.71332	30.57169	31.22224	31.2915	31.12438	30.57367	30.91598	0
Costa Rica		24.12001	24.26652	23.01555	24.58702	23.02108	22.44308	21.38743	23.03712	24.29912	25.69261	24.61051	25.65032	29.35318	29.97096	30.71296	30.74391	30.28339	32.69883	32.7377	35.12406	36.32548	36.79268	38.13254	39.07332	39.54292	38.46364	40.94061	42.54353	43.33413	41.45666	41.44709	0
Cuba		47.2732	47.77418	51.21702	46.52558	47.70289	48.09756	49.3804	48.2463	48.53969	49.05363	47.75689	43.65585	38.29401	34.51748	38.1249	38.62391	39.36442	43.21167	40.96395	41.42917	41.51758	41.9628	41.95156	41.50929	46.41069	40.26713	31.80636	33.34983	32.14805	37.32179	36.03825	0
Dominica		6.44893	8.35879	8.18401	8.98958	9.17708	9.93391	9.91605	10.75977	13.49621	14.34762	14.44323	14.42792	14.34145	14.24105	16.88448	18.8647	18.98512	19.33331	21.05641	21.70247	20.92045	24.56282	26.68247	28.35389	26.17651	22.14136	26.93485	26.63227	28.08688	28.12216	29.40182	0
Dominican Republic		15.31664	14.81708	15.28268	17.80599	15.05629	16.73811	16.73373	18.94369	19.6732	18.3592	19.58388	19.54925	19.90278	17.14875	19.23459	20.50832	21.85032	22.64167	22.98247	26.1702	27.64788	28.39527	28.83375	32.15653	30.08147	29.66681	30.26752	31.16015	30.75708	29.00512	29.44474	0
Ecuador		23.54789	23.723	25.21968	22.95356	23.55549	24.34422	25.48443	24.49383	24.73885	23.60585	24.59874	25.7043	28.25457	23.65122	28.56886	27.35176	28.83816	29.0748	29.05498	27.37781	27.68984	28.57644	28.46635	28.76802	29.33016	29.79479	31.9904	33.48745	40.02137	36.56587	38.06297	0
El Salvador		9.90524	9.18827	9.27649	9.36653	9.81014	9.66034	10.13827	9.65033	10.35287	10.34383	10.51109	10.21683	11.41007	10.69361	12.70904	15.38792	15.48951	15.36147	17.3178	17.93637	17.23548	17.88576	17.61659	19.17287	18.73147	19.67017	20.35897	20.54166	20.14006	19.62812	20.55862	0
Falkland Islands (Islas Malvi0s)		86	86.5	86.5	86.5	87	107.5	108.02512	108.02512	216.36622	196.75964	174.97286	174.97286	174.4948	174.47631	174.97286	196.75964	218.81339	198.51823	151.49804	140.67675	138.54698	136.77427	150.00104	148.15781	161.92675	176.99729	192.04094	219.8536	215.34112	214.71003	214.70748	0
French Guia0		73.57143	63.27143	80.64286	72.625	57.9125	51.7	60.23424	59.77909	64.19042	72.33297	79.22202	89.59779	66.21117	86.80625	83.48138	88.82092	88.57824	83.26961	79.69024	77.69797	76.56797	104.7165	104.6523	106.60362	102.04597	103.47567	102.39621	98.24152	92.71805	82.23275	90.60337	0
Gre0da		7.41981	8.29417	9.20856	8.95964	9.19796	9.43487	10.42243	10.8935	11.74313	12.23524	18.92016	18.94912	19.32496	18.8712	24.52534	22.60383	24.71728	30.95884	27.66122	27.49687	17.76633	31.10982	33.56459	33.80959	33.84648	34.55643	36.18789	35.63762	36.62326	37.14551	36.77716	0
Guadeloupe		20.97033	29.80826	37.39589	38.8	42.38286	37.86723	38.48986	43.1804	46.65575	50.40794	52.89578	53.99112	49.71837	52.67673	58.48204	59.49318	58.42767	59.01406	58.64749	58.16767	61.08387	61.67541	62.3944	66.36017	67.02717	69.61409	72.32286	79.49728	80.4618	68.59431	67.99474	0
Guatemala		10.10108	8.37477	8.31218	8.76385	7.32325	7.99104	8.34417	8.01018	8.38714	8.57596	8.94419	8.48298	9.08615	8.85751	10.54619	10.88701	11.02682	11.70501	13.28798	13.999	14.21112	15.04163	14.66138	15.03413	16.26882	16.77665	16.23666	16.47181	15.17898	16.0704	15.74654	0
Guya0		28.20555	31.94944	25.6355	22.6457	25.88755	26.30812	25.31519	19.21498	19.06369	12.71794	12.20405	14.08347	16.14646	19.8534	20.26616	17.2906	18.4781	20.2618	25.50134	26.86929	29.14698	29.9449	30.57603	30.01538	26.96023	29.78182	28.5619	28.62595	29.48422	29.96569	29.98249	0
Haiti		2.72289	1.93531	2.49122	2.19219	2.18226	2.44303	2.34578	3.33304	3.55284	3.20813	2.07883	2.04682	2.16514	1.51927	1.35111	2.06531	2.35401	2.76246	2.67392	2.83827	2.86237	3.03599	3.03977	2.97034	2.96937	2.95414	2.97598	3.05994	3.71334	3.41523	3.20975	0
Honduras		9.74819	8.70818	8.58394	8.66709	8.59895	7.90254	8.90302	8.31101	10.0706	11.29594	12.36853	11.94985	11.91099	11.43149	11.29919	11.70198	12.84621	12.69196	13.29286	14.13207	13.52537	14.23744	14.60373	14.63039	15.55873	16.2314	16.69963	17.88526	17.25248	15.96877	16.51982	0
Jamaica		52.96658	44.07997	37.66983	40.05708	32.61826	29.20159	29.37279	31.56085	36.3646	41.63643	44.08674	44.73941	48.64832	46.90627	50.05676	54.44642	55.09199	57.31422	57.81301	58.79557	55.96011	55.66879	56.48797	58.14917	58.36877	55.75722	62.11944	64.81397	63.66654	45.21704	44.59013	0
Martinique		28.66564	28.08985	27.9122	27.27128	24.1834	28.79656	30.63719	34.33903	40.65316	57.0367	60.87086	49.90274	55.23817	68.27042	73.31873	74.44055	74.02513	73.63092	73.27933	72.80077	73.11984	73.38659	73.96517	76.72828	78.42224	82.55039	81.93103	84.54963	75.02414	89.2458	88.90922	0
Montserrat		21.75021	24.0095	24.26685	24.48097	24.82084	27.20127	27.58472	31.84233	36.18192	36.68235	49.28108	45.86755	54.50701	54.96813	55.49713	64.4841	77.45131	111.05301	208.72413	208.90949	189.8076	177.39666	156.33772	187.14959	186.16234	214.40686	228.5013	254.87589	229.36791	226.31855	225.43415	0
Netherlands Antilles		1023.12044	948.51314	904.41133	820.20662	763.34319	635.41897	822.9975	829.73776	768.31361	806.83252	782.58345	737.08196	719.62185	577.66665	737.04106	768.61423	757.78509	795.34004	785.30154	749.95832	741.86776	743.51332	704.92157	669.26527	666.58605	695.95461	722.67731	754.01854	859.21699	763.74464	718.69771	0
Nicaragua		11.68978	11.57697	11.21382	10.42556	10.31896	11.23562	10.70913	10.86171	10.78035	11.43861	10.15719	9.19713	9.9297	9.07457	9.80002	10.19115	10.4495	10.56059	11.1692	11.84116	11.3783	11.93355	12.14236	12.20098	12.76248	13.49032	13.21195	13.23472	13.04829	12.65984	12.90397	0
Pa0ma		93.60795	93.1545	86.26307	85.58009	85.91074	76.47222	77.29642	78.93069	76.12007	72.77678	75.47889	73.38864	72.9262	69.26157	78.8255	81.80861	71.86901	72.47234	74.42406	71.95095	71.17351	68.90903	67.53506	64.45618	73.19237	69.7961	71.69706	72.28682	72.15378	74.47654	81.16585	0
Paraguay		8.79556	8.35033	7.90403	8.29289	8.86183	15.17788	30.11966	43.55942	44.01328	53.08554	54.93574	56.65898	51.83786	56.1844	64.21414	72.09978	73.29558	78.8906	78.4343	79.78119	79.30807	68.68601	70.09848	74.03314	71.22053	69.15098	70.60548	69.57283	71.01146	69.30191	68.62108	0
Peru		23.35824	24.23746	23.6235	21.60951	21.71549	21.59698	22.70919	22.5014	21.94706	19.27711	17.8506	17.33507	16.71917	17.30683	19.31029	19.86435	20.7354	19.68672	20.05936	20.16222	20.49597	20.57033	20.62438	20.78906	21.47982	22.55742	24.39032	24.41962	26.90906	26.11588	29.29269	0
Puerto Rico		133.22556	138.97549	100.96588	96.71324	107.26417	91.91236	98.80236	101.81777	92.14306	89.08477	84.85848	104.72087	92.76138	85.44062	97.52458	98.76783	100.48334	102.22764	104.08655	86.1688	115.64836	125.26468	125.95719	135.87238	138.60501	134.3902	135.16691	112.72906	117.22134	105.4057	118.12497	0
Saint Kitts and Nevis		17.12148	18.07561	21.07205	17.21027	17.31341	17.37672	17.51242	18.64213	21.84802	22.05161	22.18765	25.48811	25.33587	28.16228	33.00909	29.64755	33.21209	32.9373	32.53783	32.16005	31.70199	31.42407	31.08954	34.52433	37.73754	39.3872	51.6609	72.75418	72.35197	75.09548	74.4664	0
Saint Lucia		13.4066	10.4601	12.36701	11.20268	11.07514	13.44213	13.34465	14.75132	17.85736	17.77457	17.63735	17.43331	17.78714	16.00534	19.25326	19.30611	19.03559	19.77321	19.60209	19.46137	30.72851	32.00463	32.42464	35.40393	34.03415	33.8151	34.63872	36.30141	37.80126	36.60533	36.45634	0
Saint Vincent/Gre0dines		7.4445	6.93254	7.36666	7.28216	7.20819	8.14249	8.30992	8.96729	10.56663	13.93709	13.16378	11.55857	12.9632	11.52094	18.3911	19.19924	19.16186	20.30741	24.07338	24.14296	24.89694	24.86344	26.45947	27.72384	29.82835	29.8763	29.30211	29.82898	30.09279	30.01063	30.39339	0
Suri0me		114.59756	98.66037	94.20119	65.15396	60.43212	72.06437	65.0991	47.21055	54.51901	72.96711	83.0203	84.37776	82.19419	81.05912	83.50671	79.34034	77.49144	77.52296	76.68895	75.75422	63.07594	65.14261	66.66407	67.09137	67.8427	69.42137	70.49173	68.55762	67.51652	67.58582	65.67013	0
Trinidad and Tobago		159.67503	150.84746	148.84342	161.04729	214.54304	230.49014	170.3342	156.37023	159.66165	170.29471	180.26959	200.79471	196.25823	208.82749	246.06279	257.36469	284.26401	308.77173	308.11555	317.70389	335.96325	379.11601	401.31965	433.74185	476.06213	544.4151	665.11076	668.48194	727.6646	691.17722	761.98457	0
Turks and Caicos Islands		0	0	0	0	0	0	0	0	0	0	0	0	0	0	0	12.6571	12.0628	11.4313	11.94144	11.34053	20.33132	11.24425	8.20222	7.66042	6.99847	6.3464	5.49833	29.48896	59.07572	55.13589	52.29182	0
Uruguay		37.31676	35.16329	33.18281	40.24278	38.9189	35.9312	37.53462	39.95843	38.84513	34.09921	43.48023	38.61343	43.9901	41.65686	44.12572	39.60541	40.72361	44.59803	55.55264	49.79192	51.08531	50.20271	51.96443	50.25717	43.25956	48.02202	45.48474	54.22573	56.14836	57.55575	64.08096	0
Venezuela		107.5507	113.62239	111.81251	104.67922	103.57604	102.50874	108.12441	107.3719	105.37742	109.39863	107.98703	111.72576	109.54239	100.00394	115.34448	114.61557	117.31756	119.02825	125.43832	114.44691	117.86217	127.09929	121.2954	110.89464	117.91986	115.41969	123.18201	117.82231	122.09501	113.31919	121.99005	0
Virgin Islands, U.S.		2507.33671	2242.76687	1624.74517	1138.98633	1328.51889	1484.73601	988.31589	1162.78684	813.17326	1237.81753	1115.26692	1133.08131	1147.5528	798.10402	1145.12263	1130.05868	1115.16627	1135.4424	1175.13791	2820.77293	1276.11515	1770.94985	1762.81895	2077.76655	2172.99843	2122.00214	2218.25096	2011.05082	2082.78894	2091.73756	2146.87095	0
Virgin Islands, British		29.4599	44.65067	43.22084	41.59191	36.85369	36.63809	38.78567	43.77558	45.08793	46.51251	44.88809	43.29598	43.98532	42.24702	40.75884	39.31318	42.39305	41.04738	39.70904	38.47286	37.17797	36.16479	35.17339	39.66549	48.88614	51.05057	52.78016	55.71741	56.83158	54.49702	53.12724	0
Albania		57.9299	56.75174	55.45018	55.96309	55.49845	54.40434	52.29452	51.15072	51.54023	47.03169	33.27445	29.18087	27.1392	19.22118	22.2424	24.15168	26.49093	23.96268	25.99616	29.69816	30.45457	29.28425	30.71569	37.29669	38.25494	39.97817	39.43053	34.49421	36.73802	38.59412	41.87883	0
Austria		145.14581	143.59268	136.58322	137.72356	141.00572	143.90382	143.14514	136.23602	146.70016	148.15624	150.81286	156.37564	151.64995	155.30387	153.55748	160.13007	166.01852	167.77048	170.78132	170.99106	170.82144	177.06448	178.0577	180.14966	184.66949	189.45917	187.5056	188.32177	186.90712	179.62711	185.90759	178.88809
Belgium		209.63472	208.16805	196.33516	186.88603	193.52176	203.02452	209.47471	212.76982	211.50788	216.46928	219.56863	227.33574	222.92367	222.28582	234.724	240.15098	254.14136	259.39949	264.09104	259.39574	266.35848	262.59885	259.83409	269.31808	271.33485	268.09939	263.76141	263.29902	280.16831	254.86866	263.64173	257.97795
Bosnia and Herzegovi0		0	0	0	0	0	0	0	0	0	0	0	0	62.60363	50.9737	28.66344	49.65596	32.13427	44.44626	51.36846	51.45485	58.75126	57.84884	60.52394	59.1664	65.35689	69.99739	71.50227	66.79772	74.80893	77.79618	83.67808	0
Bulgaria		149.41878	148.10048	152.81871	154.84084	155.8208	159.76147	157.93743	157.07568	156.90575	146.53113	132.72385	104.06865	104.13724	95.60994	101.09413	111.60336	116.21895	113.59472	106.35325	97.77187	110.98433	116.82782	114.15076	116.82857	116.37751	123.30802	127.35703	114.88314	112.50933	100.08554	107.63813	0
Croatia		0	0	0	0	0	0	0	0	0	0	0	0	69.49406	66.9611	74.87575	76.55193	78.00297	79.80943	84.22168	84.97649	85.15439	86.52834	83.41339	87.40116	90.74306	89.85963	92.33823	87.86482	90.50966	86.56899	88.16058	0
Cyprus		66.66201	56.76698	59.93123	65.43376	65.93966	68.8536	70.26145	77.34392	76.06122	90.09243	93.50376	91.5356	103.1656	90.11134	112.13839	109.22999	104.77889	104.80114	111.72758	116.07184	112.12899	120.62325	116.86021	115.65805	119.14398	118.56589	122.44637	120.67296	123.29787	114.83358	110.15063	0
Czech Republic		0	0	0	0	0	0	0	0	0	0	0	0	0	155.17374	149.15572	151.5912	160.35078	142.00936	138.24306	129.73577	136.92199	141.49177	141.51192	148.03898	147.89001	151.95253	155.17168	160.93198	158.04262	149.8869	155.97227	154.47953
Denmark		168.46592	146.15759	144.33196	136.70381	140.60279	159.17987	159.16865	162.34693	157.02062	146.6357	149.64874	163.99011	153.66064	162.20954	168.58777	168.89017	186.13299	178.42303	173.85199	168.17609	164.20263	166.0183	159.5632	166.72241	159.95786	155.76645	165.45446	161.92493	153.51129	144.41377	150.57908	141.56161
Faroe Islands		152.64079	11.67853	11.57723	11.56539	11.35211	11.23235	165.96274	171.68722	180.16497	196.67848	209.64331	193.45899	193.9527	193.62159	209.67266	224.29829	227.92809	227.61118	226.34492	222.01606	223.24158	219.42285	221.518	218.94008	221.10077	224.87485	242.61686	233.01457	233.95933	231.8956	222.09382	0
Finland		203.40507	206.22664	187.78103	186.13173	193.64176	195.16876	201.06918	215.8522	214.38075	215.78188	223.77607	226.01927	225.24739	226.37937	233.08813	221.50276	223.3069	229.56848	238.05147	235.1963	235.38533	237.11189	239.42381	253.08829	259.39185	242.25265	253.40269	257.86789	246.87994	229.86462	247.97123	232.61666
Former Czechoslovakia		179.92158	177.9853	176.60479	177.90404	180.67401	183.86412	188.75805	192.35966	186.61167	188.29695	186.61482	164.55487	152.67098	0	0	0	0	0	0	0	0	0	0	0	0	0	0	0	0	0	0	0
Former Serbia and Montenegro		0	0	0	0	0	0	0	0	0	0	0	0	64.83649	51.31217	53.67749	45.80346	71.20796	72.1405	75.46886	61.65688	65.62876	70.23582	77.77177	78.10125	79.63724	77.21983	0	0	0	0	0	0
Former Yugoslavia		76.5063	79.56155	80.90635	82.27409	95.4363	98.03827	97.99738	98.16431	97.99232	97.70946	93.16996	82.82176	0	0	0	0	0	0	0	0	0	0	0	0	0	0	0	0	0	0	0	0
France		152.07389	145.47264	139.72372	141.30234	145.09548	147.62569	149.41589	150.90103	149.82336	153.27047	156.65956	166.1808	168.18909	165.40019	164.27453	168.04896	175.22796	171.68078	174.65284	175.87282	178.88729	180.05128	177.53408	178.46961	181.92082	180.07974	179.34387	176.89608	175.85928	166.20847	169.77827	165.10516
Germany		0	0	0	0	0	0	0	0	0	0	0	178.81914	174.21945	173.49256	172.16848	176.2115	175.84424	174.92779	174.75744	171.99094	175.33987	179.29997	175.22957	178.20259	179.65483	174.94113	178.29177	172.9931	175.41902	165.25688	170.69997	160.56951
Germany, East		214.72122	213.10956	215.45535	212.1476	216.03066	228.5838	229.93294	232.104	232.78733	227.83639	209.05969	0	0	0	0	0	0	0	0	0	0	0	0	0	0	0	0	0	0	0	0	0
Germany, West		183.07521	174.61272	170.34352	170.89181	176.70773	180.60641	186.58949	186.28778	186.14996	179.33096	181.51943	0	0	0	0	0	0	0	0	0	0	0	0	0	0	0	0	0	0	0	0	0
Gibraltar		255.94061	282.67405	255.02634	204.86858	191.24367	434.97993	642.47433	642.86808	816.33114	691.8312	750.5396	801.43716	1419.63227	1494.46096	1558.08855	1561.98477	1563.44165	1563.30818	1803.74722	1570.67937	3429.9189	1829.54677	1849.71318	1889.09822	1932.43614	1982.78727	2023.73657	2080.49935	2126.25754	2175.56966	2205.17259	0
Greece		77.95795	76.7966	74.40349	75.98631	77.64183	81.5217	84.06016	90.0471	95.92551	99.8542	102.51706	102.99695	98.81151	103.33864	104.2045	107.47651	109.2725	114.1734	121.12311	120.19195	126.71533	128.09076	128.22544	135.28063	134.04155	135.26184	138.98717	140.97849	137.18097	130.63546	124.81914	120.15554
Hungary		112.95589	112.11971	111.6917	112.97981	111.27071	115.71055	116.89023	120.48514	119.55601	119.86796	113.90299	108.87347	101.60427	99.40119	99.86231	100.62355	104.28752	102.23282	103.18903	103.28573	100.75749	104.36813	104.91408	107.52171	107.75972	115.13026	114.26731	112.03203	110.49094	103.58417	105.20436	0
Iceland		247.59157	243.46171	255.62678	265.20896	279.45114	274.03552	282.48603	289.81117	293.55397	303.00727	307.53355	296.76248	300.4019	311.95814	311.79256	315.63703	337.07576	348.49143	379.11635	406.87309	426.61725	430.69691	439.49869	440.76344	441.27887	440.11186	478.53015	552.95293	687.61547	664.81988	664.99854	0
Ireland		94.98384	90.56795	88.66073	85.58125	87.15021	88.66556	95.77835	96.02815	94.62821	98.78719	104.8007	108.93596	110.10712	112.68834	117.56811	119.59567	126.20323	132.72363	142.37298	149.63739	157.04859	162.2759	158.77255	154.68565	157.48304	158.15586	163.07373	159.04847	153.44866	135.58807	135.86863	127.02285
Italy		108.36195	106.20907	103.65007	101.56918	106.03492	106.27668	107.68826	111.6381	114.3728	117.7104	118.55488	121.2222	120.15149	119.56874	117.70357	122.94697	123.19609	124.83018	128.22173	130.2184	131.20877	131.58771	131.77825	135.50271	139.08784	136.84753	135.12687	134.82645	130.44432	121.58645	125.53075	121.3663
Luxembourg		389.56574	346.7197	329.40231	313.16497	337.45627	341.56818	338.74102	334.72984	343.27012	367.68649	377.93368	404.4473	396.53548	408.50236	388.11159	339.83997	341.36455	335.45935	324.53085	337.59615	350.6221	362.93742	376.85676	391.73773	426.74378	439.56308	428.86282	415.01128	403.15874	377.24462	399.43902	385.97832
Macedonia		0	0	0	0	0	0	0	0	0	0	0	0	63.36772	62.79259	57.82413	58.98703	63.42131	61.71349	70.10467	64.36358	57.1104	52.55484	52.50183	56.80161	57.86532	58.26796	57.10362	55.48265	55.14481	54.57766	58.17661	0
Malta		51.86375	56.54158	61.38155	44.60653	63.95095	52.81835	60.58382	67.62736	75.4074	81.55104	84.89318	85.57033	84.67354	93.80981	96.05797	89.29982	92.02526	97.53389	101.2634	114.84583	100.49768	83.94837	100.0998	99.32382	100.12153	103.42671	97.55434	102.95814	105.44102	216.78234	256.60989	0
Montenegro		0	0	0	0	0	0	0	0	0	0	0	0	0	0	0	0	0	0	0	0	0	0	0	0	0	0	58.04827	52.59735	63.57285	58.81024	71.27709	0
Netherlands		226.41869	210.91819	200.58676	195.79692	199.64316	207.49744	215.48727	220.15154	219.31448	219.29182	221.27335	231.81049	228.32412	231.47901	227.84741	230.93984	240.07002	236.75615	234.82592	232.75447	238.12865	244.87366	244.02273	248.01701	254.06525	259.77898	253.78157	266.3191	252.31203	247.2228	257.40588	244.9297
Norway		328.2326	338.64408	327.24783	356.06965	369.86817	372.67696	370.07215	375.74149	380.24249	395.54694	403.18612	379.99773	399.45586	396.62343	387.42376	409.99033	385.69552	397.00935	407.59817	422.29613	442.62453	419.24331	427.73159	399.52637	420.85603	436.04996	399.98126	427.20218	418.20156	407.52943	399.53743	398.08263
Poland		142.44643	127.48728	126.52945	125.6129	128.8482	131.98152	133.31949	136.77747	133.57056	128.02265	103.62762	101.18864	99.93959	103.15036	99.00694	95.88055	107.17193	105.67805	99.53009	102.84597	93.76619	89.40461	89.40585	92.52898	97.13865	95.29685	99.95156	101.72563	101.05455	98.31077	105.43167	106.47227
Portugal		44.12957	37.46722	49.35695	50.67659	53.47855	54.13926	57.45751	59.32247	65.65061	70.57051	75.35347	75.43262	76.23612	77.16549	80.62157	83.52433	86.77981	89.92597	95.269	99.55938	103.5719	104.55441	103.80268	106.61489	105.70349	106.57376	103.89519	105.95415	99.49198	99.44986	104.85919	99.811
Romania		124.35393	124.20146	129.15605	131.53952	128.18135	128.25102	131.09694	133.77281	131.43574	135.88849	123.10717	96.76944	89.96678	82.10963	82.16997	88.82205	90.65116	89.77019	77.1469	70.85748	70.65909	76.53144	75.27846	73.11359	75.94344	75.03202	75.59788	75.18794	74.4141	64.10033	64.90035	0
Serbia		0	0	0	0	0	0	0	0	0	0	0	0	0	0	0	0	0	0	0	0	0	0	0	0	0	0	84.10615	83.2093	100.84065	101.01584	105.45581	0
Slovakia		0	0	0	0	0	0	0	0	0	0	0	0	0	146.29935	139.52483	149.9142	146.26425	144.03342	143.40287	142.60456	145.3587	153.49174	156.0202	151.42615	148.48723	152.88302	150.65435	145.29742	147.02526	132.64884	141.13522	133.80128
Slovenia		0	0	0	0	0	0	0	0	0	0	0	0	114.78136	117.34995	123.01429	138.46593	152.53079	144.83818	144.77152	146.40019	145.64079	148.64626	150.15889	149.62097	156.18912	158.77149	157.98785	158.57595	169.29056	153.57257	154.52447	152.00714
Spain		81.20063	81.85397	87.71564	89.5464	84.74176	86.60126	87.6375	89.87415	95.87376	98.37643	99.6918	105.08826	104.15701	101.44273	105.30239	108.49905	110.6652	117.69556	122.89724	128.35804	136.52812	141.04469	140.02705	145.02205	147.52366	147.48094	146.1522	149.53907	142.18547	131.77656	134.16467	130.39957
Sweden		249.62463	245.41476	226.11037	232.62291	243.34173	259.38744	262.34429	269.2116	263.31799	257.85345	257.99672	255.47965	257.4783	255.92531	255.84879	260.14237	255.64607	260.48204	269.9048	265.77785	254.47279	269.00964	254.30212	241.87825	256.97046	259.14352	245.54527	253.11548	245.61278	226.36098	244.87859	235.84514
Switzerland		178.42588	164.55171	159.95802	167.09407	162.63448	175.89708	176.31453	175.59035	177.05508	170.22665	172.59875	176.606	176.40869	173.57767	174.95493	173.04384	168.96964	171.53584	175.23138	183.0695	178.19672	184.71949	174.85711	176.45263	177.00318	169.62549	171.96017	173.01164	173.42609	167.32945	162.83141	159.87344
Turkey		23.10571	21.11115	23.69044	23.88928	24.59509	26.15935	28.73394	31.09369	31.35062	32.5075	34.8848	35.80882	36.22173	38.92318	36.63277	40.19894	43.60546	45.65162	45.94274	43.85626	46.97498	42.3046	45.27936	47.02217	49.04087	51.38473	55.2155	59.58716	56.60473	55.94063	57.70662	62.84932
United Kingdom		156.99008	151.04355	148.61485	149.13121	149.73094	154.35205	156.82798	158.95655	158.54684	162.3158	161.47829	165.34745	160.6047	165.41269	164.36335	162.46809	172.2199	166.76633	165.99658	166.23297	164.51041	166.41455	166.65977	166.79594	166.77575	162.75514	159.88933	156.10069	150.65304	141.69677	142.97089	135.84915
Armenia		0	0	0	0	0	0	0	0	0	0	0	0	59.1546	45.03702	42.9374	43.72719	55.39003	47.60412	50.07025	51.06781	53.39789	54.36554	54.39309	58.43516	60.38476	67.58304	68.47422	74.4106	72.75488	67.83725	71.44406	0
Azerbaijan		0	0	0	0	0	0	0	0	0	0	0	0	128.50433	97.71245	95.81695	90.85389	79.31872	77.55626	65.50958	67.16653	61.44558	61.0072	68.83037	69.44219	72.90005	74.66169	78.34546	65.71645	78.85825	61.55582	59.73855	0
Belarus		0	0	0	0	0	0	0	0	0	0	0	0	149.53807	121.31298	105.09261	98.96637	99.26006	98.33921	96.7394	98.05284	104.86354	96.2729	91.15853	99.40191	96.57144	114.62197	118.22694	118.28856	115.35028	108.4099	116.862	0
Estonia		0	0	0	0	0	0	0	0	0	0	0	0	190.78234	127.1659	129.32318	121.39827	157.88929	153.0531	165.03295	138.33733	142.2887	148.83106	149.54374	165.58681	173.40497	174.92398	171.06877	175.58024	171.31795	152.17401	172.70665	181.47484
Former U.S.S.R.		175.70071	176.02789	182.05067	184.61896	193.75775	200.14561	204.68289	207.63282	212.67746	209.14272	210.90244	198.18919	0	0	0	0	0	0	0	0	0	0	0	0	0	0	0	0	0	0	0	0
Georgia		0	0	0	0	0	0	0	0	0	0	0	0	61.17171	36.41391	30.22879	30.09472	32.1668	33.47696	34.09574	29.9143	28.78766	26.58755	31.37123	28.20703	28.90908	32.39724	29.89641	35.83393	37.50936	38.46163	41.71213	0
Kazakhstan		0	0	0	0	0	0	0	0	0	0	0	0	202.1226	168.91851	137.69649	116.19086	120.90044	105.10977	102.604	114.04499	116.87884	122.97384	126.10739	114.91657	136.55452	138.56961	145.97531	144.8052	142.19009	127.09173	131.99877	0
Kyrgyzstan		0	0	0	0	0	0	0	0	0	0	0	0	63.68334	53.14009	51.21087	41.22124	48.96685	45.91724	45.37101	48.3136	48.88677	45.76559	38.47072	40.29084	41.43773	40.70527	41.3276	38.63326	33.51247	38.6346	37.27208	0
Latvia		0	0	0	0	0	0	0	0	0	0	0	0	85.30147	64.00847	64.08043	69.38397	69.97062	66.40086	66.41589	61.82684	64.86253	68.23957	65.80459	69.18426	76.19767	80.96754	81.09796	76.38218	72.75679	73.88855	72.50579	0
Lithuania		0	0	0	0	0	0	0	0	0	0	0	0	128.91346	102.01771	96.4588	103.06612	98.38341	97.95842	106.7831	83.20941	81.35321	86.89285	93.73055	97.41068	97.88419	98.0283	98.3755	107.9197	105.10343	91.21572	73.94813	0
Moldova		0	0	0	0	0	0	0	0	0	0	0	0	64.61396	46.07316	35.78994	31.96284	34.92626	35.68134	32.47207	26.0891	26.34779	25.94316	29.09421	32.29359	30.71037	32.74864	35.44498	33.3318	35.02587	31.47023	31.78015	0
Russia		0	0	0	0	0	0	0	0	0	0	0	0	229.82598	205.97187	196.64501	187.82982	174.44985	164.4056	163.8087	171.53146	177.75335	175.66948	183.21087	189.40043	195.45684	194.82476	193.97329	201.41768	208.1032	194.36537	205.72805	229.93036
Tajikistan		0	0	0	0	0	0	0	0	0	0	0	0	52.71565	45.83129	45.09605	36.71753	39.85057	37.31523	37.83688	39.55957	38.37915	38.97198	39.05888	41.19096	40.99463	41.71008	40.35791	38.49683	35.58215	25.42066	25.44346	0
Turkmenistan		0	0	0	0	0	0	0	0	0	0	0	0	81.26406	69.01122	71.63504	74.54408	71.91672	72.8138	65.83615	73.49618	91.4664	113.00663	129.8172	166.63914	175.12789	178.47455	178.28609	188.49828	192.97576	181.47981	186.83102	0
Ukraine		0	0	0	0	0	0	0	0	0	0	0	0	165.29446	155.87539	135.63377	134.90765	124.70854	120.4815	117.16222	116.26914	117.35023	116.29153	121.14064	131.80163	132.21251	134.70951	125.8844	136.06696	135.33587	97.55308	112.15408	0
Uzbekistan		0	0	0	0	0	0	0	0	0	0	0	0	76.90431	91.78512	77.21654	81.01483	79.8935	78.30498	75.78436	75.45369	78.05824	80.59215	81.57447	81.86778	85.80925	81.43976	83.05821	82.22446	85.84347	72.38951	71.60581	0
Bahrain		395.65207	434.28422	444.52267	453.1375	420.80684	484.18568	502.44091	581.89764	485.16164	479.69409	506.94111	549.50583	447.52078	500.56341	499.34611	487.27602	476.79871	548.69229	562.5643	556.99281	556.97608	561.26207	556.24298	522.06013	493.84228	488.2956	496.42294	487.06949	482.92344	474.73914	472.50406	0
Iran		39.85542	35.91281	39.50427	46.52259	47.55806	49.29184	48.13038	48.54869	49.90288	53.37303	53.41102	53.48499	53.87027	51.25352	58.09018	59.57614	60.83029	67.13203	68.44339	71.39363	73.15594	77.4629	83.78142	87.37947	89.68126	101.48011	104.93711	106.58224	107.94432	119.03337	118.40062	0
Iraq		39.59992	35.24302	32.62486	37.59214	35.49787	36.09953	38.33966	38.64127	45.0402	46.96099	50.59077	34.33568	46.94757	45.87593	58.09632	57.7901	55.76616	50.10607	49.34165	48.72695	47.8059	48.60183	47.67023	41.00429	44.33589	47.51038	45.79058	47.60538	47.4937	50.35096	50.5595	0
Israel		68.85061	70.70674	70.9035	68.45642	69.07124	63.20464	64.40961	66.48515	70.37139	71.83631	70.85657	72.14325	77.96573	73.77601	82.36335	79.12964	80.79222	126.17823	125.00116	123.43656	132.68493	139.82399	132.02227	131.40867	129.27363	129.31698	128.7575	130.36696	117.05271	121.24824	128.55196	130.35508
Jordan		35.62175	40.631	44.53281	45.89209	45.69986	45.72567	47.42501	49.95782	45.10201	44.67725	44.55222	37.8561	41.48238	35.28261	44.94798	46.23487	47.96001	45.35179	47.99788	46.779	48.09583	45.9387	47.04469	50.15785	54.25109	56.09312	54.8982	51.64912	50.19321	49.94039	50.98574	0
Kuwait		351.07553	245.87603	233.80728	248.11377	248.39279	232.38194	249.5	285.58562	314.7214	339.95869	209.44977	229.37201	248.6578	278.06118	363.77927	355.56071	430.48109	442.90782	454.69078	449.12547	461.21238	435.28265	426.05849	448.85209	458.28488	508.17917	489.07736	473.42046	477.43647	488.13919	504.67238	0
Lebanon		36.13005	33.0165	31.43238	31.9367	30.16968	34.16755	32.0038	32.63301	29.39265	22.9502	20.76017	33.67629	33.52732	39.16429	47.03667	50.01779	52.15458	59.16872	59.94173	61.08229	61.80288	58.98911	59.5995	61.73775	58.96092	56.14672	50.43629	46.00537	45.15389	69.09541	66.91524	0
Oman		54.55055	55.00597	63.62841	70.29103	69.78162	79.30471	86.70128	86.00341	78.06106	97.23712	102.30574	112.52112	105.41178	110.97416	114.04554	104.9231	105.04767	118.40837	149.58481	126.66532	140.14553	139.47596	141.76855	137.48279	143.99531	178.14854	200.58384	207.79186	240.95996	257.77277	292.1469	0
Palestine		0	0	0	0	0	0	0	0	0	0	0	0	0	0	0	0	0	3.37836	5.04622	4.97021	6.35985	8.30038	7.4818	7.77766	11.52034	13.71264	14.46149	14.33633	14.97572	11.27484	11.1306	0
Qatar		935.44951	838.90728	947.81113	792.08817	859.42857	710.34938	687.45375	678.10397	666.71265	665.84933	790.28654	885.22048	1024.64849	1116.34077	1129.65714	1104.35196	1102.28412	1114.05924	1076.82262	975.10969	1007.58088	748.39078	749.36706	794.36483	854.42696	911.40877	848.78755	781.74536	715.54965	692.73263	642.38497	0
Saudi Arabia		165.97342	190.03666	174.2814	177.63367	195.66636	203.31331	215.3558	210.16433	208.98929	197.51154	208.42105	214.58901	214.73829	164.95214	214.28243	203.9835	212.7367	220.28021	223.48403	221.00049	227.70207	235.76262	241.69505	253.32108	267.57308	276.00993	284.36606	252.45283	298.98963	285.25724	305.0291	335.13136
Syria		31.31133	31.95177	31.45248	34.30795	36.48466	36.77792	35.38496	38.6608	38.87496	40.03542	45.0227	40.2853	40.39985	39.839	45.0571	42.15725	43.93683	45.58874	48.08374	48.17531	47.48022	45.14187	47.38206	46.67953	46.60007	43.33289	41.73787	39.39197	38.34851	43.55556	46.50298	0
United Arab Emirates		267.22884	407.78913	363.80323	422.54156	452.97041	584.59045	627.17939	699.89324	722.76566	736.67303	673.14261	770.20818	784.9496	669.37309	643.14448	653.61095	641.94213	644.88639	634.19191	610.16383	579.7237	558.29408	577.76212	564.00646	567.82449	566.1559	595.18446	635.50892	712.47513	702.59924	710.69286	0
Yemen		10.5216	10.41284	11.86245	10.4798	12.91441	13.91727	12.98583	12.49845	12.41215	12.88045	12.90664	12.8841	12.91453	9.26939	9.56534	10.08503	9.95585	10.03065	10.4563	10.61058	11.12593	11.44823	12.17895	12.77529	12.48101	12.62222	13.37787	11.83142	14.39831	12.65526	12.84637	0
Algeria		42.58489	35.04165	47.80934	51.93137	54.15619	47.61069	46.83215	48.80239	50.50089	47.64537	48.30785	52.46843	49.05304	39.8991	44.58555	46.01861	43.84362	41.01903	42.10229	41.43868	40.42605	40.42029	40.49605	40.42788	38.94902	45.00144	46.17394	47.63014	49.71854	51.00367	50.02219	0
Angola		8.07121	7.83572	8.11611	8.43219	7.32741	8.70968	8.57169	8.53574	8.66611	8.2607	8.41573	8.5046	8.53862	7.83057	7.72592	7.96381	7.44091	7.9913	7.0685	7.62195	7.1702	9.17841	9.53341	9.78925	10.10302	9.99647	10.91271	11.89637	12.2459	12.60629	14.03743	0
Benin		1.90633	1.85759	1.27544	1.81127	1.71176	1.95183	1.83735	1.39573	1.61881	1.68379	1.88901	2.09457	2.27714	2.37016	2.38408	2.52897	2.63586	2.77671	2.88079	3.04948	3.66465	3.58101	3.67257	4.18607	4.72406	4.78976	5.46686	5.75793	5.91391	7.48681	8.1312	0
Botswa0		16.86115	16.5013	14.79691	13.90071	13.82142	17.65206	18.11557	19.9569	20.74637	22.99111	26.07308	26.24239	29.05391	26.56155	27.5922	29.03721	26.08498	26.60806	29.50289	29.40172	34.26115	29.98348	29.78616	28.17789	31.61451	33.33466	33.17303	31.7173	32.47321	32.72051	36.61155	0
Burki0 Faso		0.97053	0.95222	0.93126	0.91152	0.8889	0.82416	0.93925	0.95113	0.94212	0.81594	0.84379	0.93925	0.91913	0.93765	1.06249	1.04973	1.0656	1.6173	1.43658	1.43265	1.43391	1.38073	1.374	1.37988	1.35954	1.34975	1.29816	1.40689	1.31775	1.6281	1.60038	0
Burundi		0.36989	0.40194	0.34682	0.42927	0.53823	0.56298	0.56059	0.62063	0.89159	0.93403	0.99039	1.06864	0.98574	0.75027	1.17174	1.0681	1.07668	1.08259	1.04612	0.99746	0.96441	1.01054	0.99779	0.96579	0.84901	0.81347	0.76054	0.70008	0.44369	0.46182	0.47419	0
Cameroon		5.37825	5.76562	6.51553	6.29953	6.19852	6.27175	6.63858	6.11865	5.92029	6.69316	6.53714	6.42338	6.26618	4.62774	5.62011	5.61202	5.45105	5.59799	5.46605	5.21841	5.30035	5.19858	4.85121	5.08655	5.14112	4.96873	5.59558	5.48272	5.72074	5.75075	6.47196	0
Cape Verde		15.31139	15.07985	6.56387	6.35634	7.63554	7.43798	2.49326	2.72297	3.88361	4.10005	4.30116	4.33911	4.45372	3.75222	4.7247	4.50892	4.66085	4.56446	4.48973	4.39759	7.38698	4.89113	5.10432	4.99156	9.34713	7.9307	8.79008	10.14684	10.26707	11.00415	10.84234	0
Central African Republic		1.1664	1.38573	1.44612	1.47734	1.37999	1.31784	1.53981	1.37275	1.41114	1.31844	1.37414	1.38782	1.37705	1.36188	1.39607	1.36485	1.35123	1.34998	1.33511	1.30439	1.35405	1.35364	1.36928	1.34493	1.34639	1.29529	1.33113	1.39231	1.39367	1.28341	1.25601	0
Chad		0.89952	0.86048	0.82085	0.78151	0.37034	0.43742	0.76604	0.64506	0.41844	0.41567	0.84332	0.76498	0.74073	0.30476	0.38142	0.36504	0.36162	0.35345	0.34316	0.33295	0.35041	0.3467	0.34683	0.33456	0.29849	0.32124	0.33689	0.38312	0.35821	0.35224	0.34508	0
Comoros		1.86538	1.81742	1.77514	1.73344	1.71797	1.43121	1.40022	2.17114	2.22054	2.17585	2.74912	2.58683	2.52077	1.94736	2.50671	2.44379	2.38816	2.33777	2.36804	2.30982	2.4884	2.51189	2.54205	2.49258	2.49734	2.57974	2.55415	3.10534	3.17046	3.10539	2.63856	0
Congo (Brazzaville)		7.13145	8.24382	7.21959	6.24013	6.39602	8.89106	7.55283	8.92044	7.0549	7.85748	8.50371	7.55634	6.97475	5.23166	5.66132	5.55477	5.66046	5.45582	4.98123	3.98392	4.19506	4.93742	4.62266	5.04446	5.27506	6.88805	7.67505	8.90527	10.00266	11.92095	16.30393	0
Congo (Kinshasa)		3.12696	3.11227	3.06969	3.0978	2.95418	2.92957	3.024	2.79253	2.99457	2.96775	2.71459	2.59614	2.75306	2.48085	2.19503	2.31846	2.29367	2.04531	1.89415	1.82599	1.74871	1.52936	1.43296	1.41587	1.62503	1.62809	1.60579	1.65582	1.56092	1.54539	1.6176	0
Cote dIvoire (IvoryCoast)		8.5973	9.11764	8.24863	7.69054	6.56836	7.46352	7.33588	7.7961	7.86145	7.60612	6.23697	5.0497	4.75129	4.55439	5.19746	5.47447	6.63716	6.08578	6.006	7.60869	7.86314	6.35315	6.05269	6.02012	6.21734	5.99112	5.8987	6.0551	6.47383	6.30299	5.87912	0
Djibouti		67.45739	51.34429	49.93879	35.49688	29.24359	28.31107	24.57221	24.31303	23.31338	52.0632	46.59824	42.61999	43.11628	42.39641	44.3719	43.69223	42.50828	41.34986	39.45867	37.90911	36.82444	36.10737	34.98848	37.04642	39.39289	38.49356	34.95961	33.40146	23.14925	23.00586	22.51171	0
Egypt		16.56862	18.74231	20.29581	22.32761	23.70045	24.22814	24.12626	24.77221	24.48808	24.99356	26.18869	25.64594	25.2021	23.89987	26.76119	26.93637	28.90116	29.30428	29.62853	30.15056	30.77423	33.4239	33.18947	35.00593	36.36809	37.07175	34.25363	35.80819	41.33215	40.61368	41.09814	0
Equatorial Guinea		3.3076	3.10881	3.70568	3.5251	3.36858	3.70515	3.621	3.39635	3.29827	4.66323	4.65699	4.76019	4.39622	4.49388	4.48496	4.34912	4.32745	4.53365	5.99974	5.83059	8.8004	6.9919	94.89191	94.48159	10.69884	88.78528	86.48884	98.03337	93.52128	100.78676	106.55663	0
Eritrea		0	0	0	0	0	0	0	0	0	0	0	0	0	0	4.06341	4.26334	4.16028	4.09737	4.25168	3.48483	2.11558	2.42508	2.16833	2.34729	2.11221	2.04424	1.9843	1.81687	2.01425	1.26458	1.21082	0
Ethiopia		0.83506	0.81016	0.8621	0.95353	0.96194	1.11914	1.06874	1.16539	1.10378	1.12997	1.11899	0.93002	1.20282	1.05723	0.81443	0.8535	0.6917	0.67977	0.85745	0.97733	1.0023	1.05021	1.09283	1.15904	1.17919	1.22348	1.34605	1.41845	1.62268	1.5594	1.58963	0
Gabon		39.8147	43.82491	40.07317	53.22384	46.35367	38.07401	33.38322	37.83426	39.23758	47.8747	46.18187	46.12966	46.21714	40.02212	42.55627	39.11037	39.5265	40.58514	38.24755	33.41449	29.79938	30.1018	29.18698	29.24878	28.80622	27.41546	29.60691	29.8137	35.74444	27.68115	29.3968	0
Gambia, The		3.4255	3.32006	3.22653	3.13563	3.31416	3.13131	2.79847	3.10212	3.06855	2.90383	2.84486	2.8489	2.72502	2.77879	2.95637	2.65976	2.56214	2.48635	2.5489	2.47538	2.69193	2.81582	2.80594	2.76355	2.70687	2.73052	2.85087	3.43019	3.48771	3.63743	3.85595	0
Gha0		7.71865	7.30343	7.09812	4.45159	3.91716	4.30422	5.50695	5.8706	6.28033	6.77347	6.45537	6.56485	6.98168	6.41022	6.75569	6.75639	7.01142	6.79559	5.21766	6.23498	7.5267	7.32719	6.60843	6.20714	7.01936	7.07665	6.95669	6.03895	6.60803	7.48066	8.25862	0
Guinea		3.08979	2.97268	2.95905	2.89932	2.8388	2.3703	2.96549	3.03169	3.02321	2.86594	3.57339	2.65295	2.61296	2.39564	2.59448	2.50511	2.4462	2.53882	2.54156	2.57076	2.6053	2.78553	2.80783	2.52118	2.63421	2.57633	2.46732	2.44952	2.47486	2.43102	2.37006	0
Guinea-Bissau		1.56167	1.52158	1.51132	1.47691	1.94733	2.04844	1.57134	2.82792	3.08278	3.15481	3.89995	3.88965	3.80523	3.16091	3.91112	3.78135	3.73684	3.65966	3.57545	3.4949	3.78863	3.75212	3.80898	3.83105	3.73594	3.80374	3.69562	3.74062	3.60183	3.63331	3.56097	0
Kenya		6.06999	5.99932	5.71586	5.47298	5.20142	5.22117	5.34665	4.74197	5.16461	5.39274	5.32145	4.7637	4.937	4.71308	5.00134	5.07199	5.15049	4.70238	5.07437	4.73245	4.64743	4.58687	4.62164	4.84827	4.93076	5.19159	5.53532	5.40521	4.88738	4.97615	5.38306	0
Lesotho		1.5612	1.37402	1.47681	1.43801	1.40361	1.41141	1.38441	1.35948	0.91078	1.31211	1.67421	1.67352	1.73822	1.73777	1.93342	1.9299	1.9278	1.88218	1.6896	2.44965	3.06612	3.10987	3.19155	3.29891	3.09148	3.44181	2.76526	2.95416	3.06518	2.88274	5.17414	0
Liberia		17.14737	15.35455	14.98823	14.47396	12.31436	12.11924	9.49406	7.1899	8.64318	6.86941	3.80451	2.62239	2.54904	2.50945	2.77774	2.80295	2.86128	2.66388	2.45459	2.31109	2.36997	2.43273	2.56227	2.62552	2.6304	2.5413	2.76204	2.88019	2.45294	2.16172	2.04403	0
Libya		129.86103	111.79236	106.07118	109.56841	106.308	115.05027	120.07252	119.77897	119.56353	120.49071	124.46559	126.59433	115.17516	100.21439	117.52296	120.71255	126.72326	131.82476	123.61339	113.52255	125.35533	129.88725	132.88386	127.82501	138.77578	138.60052	128.81961	131.04358	125.16091	129.72566	137.46548	0
Madagascar		2.17589	1.84403	1.65249	2.04622	1.97906	2.0898	1.47499	1.95136	2.07609	1.52713	1.45963	1.45456	1.49946	1.40141	1.5923	1.60182	1.59635	1.58121	1.57398	1.53216	1.9682	2.06267	2.25663	2.30182	2.42802	2.29191	2.20251	2.17993	2.31266	1.61972	1.57929	0
Malawi		1.90421	1.92606	1.76084	1.5571	1.49767	1.54402	1.50854	1.48461	1.35556	1.4369	1.56132	1.73652	1.68871	1.57189	1.78933	1.85664	1.83919	1.79774	1.86147	1.87484	1.92782	1.88922	1.91907	1.90666	2.05245	2.10217	2.09785	2.09664	2.13452	1.9855	1.9813	0
Mali		1.02478	1.29426	1.01453	1.01371	1.00983	1.06802	0.8666	0.96418	0.59283	1.00378	0.99476	1.00106	1.01512	1.02074	1.02116	1.00737	0.99162	0.99569	0.98234	0.95509	0.94832	0.92631	0.96251	0.94107	0.94136	0.99797	0.90087	0.89299	0.88408	0.87584	0.86146	0
Mauritania		5.95273	5.6935	5.64086	5.48589	7.80998	7.54587	4.20388	5.6625	7.09136	8.08391	7.04365	7.24472	22.52913	18.56543	21.65259	21.44247	21.21438	20.9759	20.5298	19.9989	19.89674	19.39529	18.04145	18.07651	14.99593	17.29339	14.45797	13.00609	14.33858	8.89618	8.70454	0
Mauritius		14.17273	12.32052	12.101	12.84165	13.26084	14.14966	17.0537	14.95675	20.2866	23.8292	26.12711	25.88177	30.29448	28.0872	29.23304	31.64181	31.1638	31.1856	31.79835	34.67832	44.97744	48.84725	44.91526	46.43732	46.80451	48.57531	50.80213	53.67698	54.81175	49.70927	51.61907	0
Morocco		11.60797	10.90185	10.80254	10.83605	9.9233	10.35523	11.38381	11.18749	11.52574	12.62263	12.87449	13.07373	13.13803	11.95908	15.1804	14.29869	15.01476	15.05237	15.18491	15.75635	15.90032	16.90109	16.92902	16.8249	16.65907	16.64582	17.07641	17.27291	19.33187	20.56288	21.27771	0
Mozambique		14.49781	5.40818	5.10976	6.70357	2.61324	2.49114	1.34902	1.31206	1.90874	1.56812	1.5677	1.57893	1.52338	1.5731	1.42766	1.41063	1.318	1.53874	1.86805	4.42045	5.59686	7.11759	7.08626	6.88035	7.2548	7.872	8.62827	8.68631	7.92173	8.3573	8.0643	0
0mibia		0	0	0	0	0	0	0	0	0	0	23.35915	11.96367	10.90856	11.26133	12.38796	18.97724	17.90425	17.00007	18.44664	20.88137	21.91995	24.50365	25.65314	27.18958	28.35699	28.89568	30.54746	31.35918	34.7595	33.04045	30.71715	0
Niger		1.50174	1.52505	1.56424	1.57565	1.61915	1.58427	1.30369	1.40624	1.83607	1.86712	1.86144	1.81912	1.79102	1.75293	1.74566	1.68655	1.62131	1.55215	1.50928	1.44135	1.40927	1.39647	1.43185	1.42085	1.47566	1.34896	1.27486	1.27508	0.91898	1.22654	1.20112	0
Nigeria		5.64332	6.71359	6.50109	6.38605	6.72645	7.06172	6.74345	6.92945	7.22555	7.62179	7.2278	7.75437	7.72406	7.16803	6.93829	7.58133	7.5443	7.37306	6.90171	6.74932	6.5166	7.14817	7.14294	7.27798	7.11978	7.62323	7.0691	6.59833	6.76577	4.29601	4.51418	0
Reunion		23.43172	24.58888	26.66386	29.41967	30.3361	30.6661	30.09808	32.20858	33.8759	36.94985	38.77001	41.18512	41.97977	41.97052	50.67239	49.41668	50.1429	50.00738	61.59591	60.52504	61.6085	63.22055	62.25447	61.49115	61.22714	61.50329	61.31079	61.94641	62.9294	63.95594	62.92552	0
Rwanda		0.68968	1.21415	1.17731	1.28801	1.87992	1.88395	1.78224	1.77355	1.71649	1.72281	1.71345	1.69904	1.70554	1.14924	1.76997	2.13609	1.75805	1.551	1.51834	1.44038	1.46881	1.43211	1.40879	1.40423	1.28622	1.29826	1.25515	1.09254	1.08263	1.12831	1.1022	0
Saint Hele0		0	6.0818	6.32625	6.22407	5.60897	5.41494	5.24351	13.54826	13.42101	13.36446	13.27044	6.47453	6.40733	12.90607	12.84534	12.74178	12.60354	12.53426	12.43389	12.33511	42.87282	24.16959	23.99825	23.83254	17.66979	23.47188	21.62678	23.80008	18.11467	17.22829	17.15416	0
Sao Tome and Principe		5.75859	5.6113	5.61526	5.30415	5.41071	5.44772	5.26205	5.24723	5.11753	5.02657	9.0483	9.28341	9.43647	8.86442	9.50346	9.33734	9.1432	8.98143	8.72421	8.69268	9.80326	9.19002	9.41524	9.27486	8.94434	8.92263	9.82946	11.76015	11.64931	11.36427	11.08885	0
Senegal		6.59078	6.23186	6.21022	5.78396	6.70647	6.40912	6.16378	6.04349	5.02547	5.07379	4.93029	4.43935	5.25675	4.34895	6.28975	6.60236	6.45852	5.79303	6.00618	6.45635	6.72329	6.55038	6.6745	6.68922	7.44302	7.74889	7.73265	7.64902	7.55205	7.17072	7.03077	0
Seychelles		49.47306	39.16841	35.81385	61.47678	64.016	64.97953	64.58974	68.16802	93.50126	97.9811	88.97081	94.62512	96.07019	96.81094	97.75972	97.34551	96.07558	102.3358	101.31608	100.06741	102.38476	104.12072	149.75395	144.4482	147.96811	144.15781	188.6837	156.13497	169.97764	182.10464	151.89504	0
Sierra Leone		3.16999	3.1245	3.2849	3.03444	2.95731	3.15007	3.32297	3.48959	3.7106	3.61428	3.50481	3.5835	2.67197	2.28138	2.64518	3.13348	3.18309	3.30063	3.33034	3.3394	3.50611	3.37744	3.24115	3.18208	3.65436	3.5557	3.44346	3.63074	4.22397	3.86738	3.87661	0
Somalia		2.85749	3.30874	3.24381	3.07719	3.08778	2.92264	2.98968	2.14701	2.17964	2.26789	2.09497	1.29136	1.26929	1.25702	1.28168	1.25439	1.22128	1.18929	1.14837	1.10872	1.33115	1.28568	1.24543	1.21942	1.16639	1.14924	1.17589	1.29247	1.20374	1.16996	1.15143	0
South Africa		93.26935	97.97962	101.41383	99.15355	104.0576	102.64584	103.06316	102.04952	102.75835	94.3287	91.57378	93.54417	93.8347	89.7546	98.03061	97.3247	97.33297	105.11038	98.93316	100.23839	101.71578	101.96284	98.43929	104.71121	110.88106	107.83603	110.32818	111.97743	117.44967	114.73951	113.88982	0
Sudan and South Sudan		2.68591	2.76801	2.88835	2.70235	2.44239	2.69602	2.93965	2.78822	2.9098	2.71315	2.64168	3.47412	3.15644	2.65648	2.60345	2.3981	2.36415	2.35723	2.31262	2.44072	3.23577	3.96975	4.00204	4.29994	4.50021	4.71312	5.11937	4.88112	5.26563	7.07709	7.23133	0
Swaziland		16.50531	15.24123	14.24463	10.9431	12.39851	14.91762	13.85294	14.69842	14.79691	14.81339	13.89924	13.21462	12.71775	11.24359	15.83463	15.6149	14.10568	10.57691	10.30181	15.01592	14.30868	14.10963	13.90993	12.56774	11.76721	11.39679	12.4654	13.95068	13.83872	13.01445	12.77248	0
Tanzania		2.09233	2.27533	2.17677	1.9618	2.03129	2.00701	2.23215	2.00168	2.05961	2.06118	2.19723	1.95148	1.9795	1.96338	1.75122	1.68137	1.73154	1.57865	1.75844	1.80824	1.75344	2.00681	2.13627	2.10032	2.18504	2.34885	2.36165	2.68643	2.79126	2.87315	2.71328	0
Togo		3.65913	3.32002	3.1917	3.19613	3.63663	3.43243	2.80964	2.59782	2.61477	2.88763	2.77393	4.37248	3.09233	2.62587	2.827	2.92521	2.68783	2.44766	2.5991	3.58408	4.38927	3.09352	3.89855	5.90989	6.08962	5.86954	5.9374	6.22035	6.86678	3.40957	3.50494	0
Tunisia		19.88358	21.35503	19.93712	22.33268	23.25331	23.16427	23.93247	21.79851	22.68204	25.29522	24.60756	23.63387	22.39591	23.00485	26.9524	23.72437	25.45541	29.12799	30.85818	30.77173	31.65596	34.99094	34.85695	33.71319	33.65551	35.78064	32.97588	28.8101	30.39064	28.81654	29.3707	0
Uganda		1.32637	0.92346	1.02707	0.94995	1.00904	1.03042	1.0665	0.92453	1.15068	1.11305	1.17291	1.22066	1.31039	1.20321	1.27457	1.2587	1.25796	1.30099	1.35958	1.31792	1.43224	1.48103	1.49643	1.55734	1.55839	1.54783	1.40283	1.51311	1.49648	1.96328	1.98381	0
Western Sahara		19.00148	16.88847	17.07571	15.42101	15.34829	15.05072	14.51297	14.40345	14.03142	13.54301	13.63179	13.12601	12.78577	11.53188	11.55481	11.87803	11.25707	10.73998	10.23119	9.75886	10.71622	10.39903	9.95473	9.53891	9.09925	9.92628	8.47576	8.58844	7.91067	7.66219	7.42039	0
Zambia		23.9568	23.48073	23.27875	21.9124	20.75123	19.92592	19.21126	17.21458	17.02312	13.977	14.6644	13.76289	13.98563	12.53108	11.84051	11.66582	10.93888	11.65223	10.81172	10.22299	9.94009	10.1966	10.22778	10.40155	10.34381	10.67768	10.87556	10.53588	10.31259	9.88649	10.51923	0
Zimbabwe		21.60644	20.96932	19.00059	20.6936	18.80816	17.99967	20.75273	21.32334	21.09353	20.50739	21.63437	22.32215	21.21447	18.86572	17.94835	17.71076	18.00479	17.42718	17.21668	19.39937	17.94816	16.80363	16.84001	16.74291	15.00307	16.60839	15.14663	15.22479	13.27532	13.59258	14.04733	0
Afghanistan		1.79355	2.21961	2.56999	3.1114	3.06473	2.95086	3.02906	4.85777	8.47601	8.16836	8.03658	3.5018	2.15198	1.83274	1.69451	1.36386	1.31544	1.21975	1.14732	1.11861	1.06121	0.78571	0.77258	0.65144	0.62722	0.64488	0.68274	0.96743	1.07073	3.44869	3.58678	0
American Samoa		182.83053	205.98303	277.1855	168.36877	187.45282	168.68998	167.57688	163.85648	154.87237	171.07113	171.07007	166.24465	165.54325	155.11829	152.26234	146.51427	145.71392	143.48155	141.05448	138.81846	135.65562	136.40979	139.19326	139.71663	139.1635	148.60154	151.92368	163.60159	152.76928	154.37894	75.25932	0
Australia		187.65985	189.26865	190.88352	192.76188	208.43422	207.96262	204.29278	212.81519	208.47542	216.92646	219.0131	215.62781	218.85936	222.35735	220.52608	224.54107	231.59782	247.06881	246.05699	255.10458	253.67648	259.32313	259.6846	258.84653	270.91259	279.23519	279.23881	286.36164	275.49463	271.19967	270.10256	257.32738
Bangladesh		1.45529	1.47992	1.56209	1.42496	1.66542	1.69381	1.80177	1.94795	2.11734	2.28206	2.25837	2.25847	2.47497	2.54015	2.84082	3.14358	3.15166	3.21219	3.28305	3.58313	3.8127	4.10894	4.26683	4.55746	4.76311	4.98373	5.32514	5.4645	5.86958	6.2724	6.33497	0
Bhutan		0.3296	0.97423	1.20256	1.06756	0.93629	1.17763	5.07515	17.09126	20.81832	20.47954	21.19643	21.18169	22.4175	22.94013	25.78689	27.88768	30.96963	30.5676	29.11336	28.88495	28.47551	30.27245	33.14887	35.78991	31.59954	35.0604	52.92563	73.63573	77.85731	78.1573	81.18146	0
Brunei		442.81942	441.73914	467.71128	355.60695	304.62592	352.21451	226.66529	352.98123	298.61742	336.64711	277.82432	149.24576	206.60733	178.14267	179.39014	215.00731	195.30847	203.19829	179.63182	197.15426	199.5228	219.77648	249.30961	259.40647	283.43434	330.03579	496.60173	502.31761	512.77814	328.77115	374.13869	0
Burma (Myanmar)		2.08488	2.10843	2.29123	2.57531	2.74481	2.81912	2.3698	2.30764	2.15636	2.22934	2.11666	2.05004	2.10942	2.12521	2.56145	2.67139	2.66174	2.80182	3.00746	3.03335	3.53077	3.44758	3.86829	4.29835	4.35826	5.66967	5.2258	5.59925	5.47889	4.56119	4.50718	0
Cambodia		0.65989	0.67761	0.73125	0.74605	0.79781	0.79802	0.80649	0.7887	0.79301	0.76806	0.74976	0.74385	0.73331	0.70007	0.69552	1.88385	2.03646	2.33816	2.68018	2.6845	2.7613	3.17372	3.36278	3.6161	3.97122	4.15751	4.50249	4.78354	4.92288	4.66101	4.23279	0
Chi0		17.55539	17.24377	17.7126	18.48548	19.61478	19.85639	20.6974	21.7253	22.86772	22.95895	22.64177	23.51286	24.17592	24.05612	26.98526	27.33499	28.49555	30.91115	31.69596	31.06555	32.39504	33.5081	37.01779	41.23726	46.06812	52.33248	56.95273	60.56171	64.49649	71.29933	75.84265	82.00652
Cook Islands		23.1538	47.43285	47.19849	47.4584	46.77901	47.33322	42.99191	42.93109	42.24243	36.82551	36.33901	29.92617	35.93066	36.07202	36.34964	36.46429	36.72318	37.45753	38.51559	39.70831	49.11015	51.06797	53.01563	54.99483	62.97833	72.02382	78.37635	75.7454	82.32901	84.87702	87.69931	0
Fiji		24.08983	24.37544	23.45997	19.65104	21.17899	20.94704	24.76489	20.48051	20.61786	23.43019	25.62047	21.7033	22.04916	20.76897	23.76103	25.09351	25.62699	25.29593	24.34326	26.5631	30.20836	32.39281	37.0024	44.398	47.67991	46.53389	48.17175	47.52771	50.5225	27.98721	26.74007	0
French Polynesia		20.68312	29.59804	38.91133	50.91563	74.65356	63.67007	77.261	76.61554	75.08165	73.52378	68.93848	67.07134	64.43229	59.19155	50.56748	52.65472	52.19869	51.4212	51.30163	47.58161	45.45301	44.35143	46.11488	54.9182	54.46042	58.25102	62.67407	61.96561	66.2777	63.24254	62.85799	0
Guam		498.61981	682.41943	530.67033	486.15007	162.74212	77.96709	127.25094	86.31842	88.30843	81.77554	193.39441	212.96317	246.63949	322.41569	464.06625	349.43002	308.21164	348.31669	281.82449	308.04264	252.90137	270.62668	183.49669	210.04597	166.44888	185.50819	192.68595	173.11769	149.89386	91.46871	81.79928	0
Hawaiian Trade Zone		0	0	0	0	0	0	0	0	0	0	0	0	0	0	0	0	0	0	0	0	0	0	0	0	0	0	0	0	0	0	0	0
Hong Kong		53.80133	54.70603	59.07215	64.13854	65.49069	67.84076	70.97222	78.812	87.7779	90.84878	89.05271	86.04862	95.41291	95.42366	97.7676	100.98138	106.39437	106.2761	111.52376	131.00596	120.99217	127.73746	136.86975	140.71958	155.6035	161.2105	158.43626	162.46756	155.11548	172.17993	178.12764	0
India		5.90005	6.61804	6.63968	6.85306	7.59928	7.78575	8.20383	8.15667	8.73895	9.07485	9.40055	9.80864	10.1715	9.85784	11.01778	12.43038	11.62093	12.02845	12.37236	13.00875	13.24981	13.52218	13.13557	13.34928	14.26193	14.96965	15.91772	16.73623	17.45012	18.51247	18.68523	19.85471
Indonesia		7.72687	8.2583	8.30537	8.6351	8.93171	9.20811	9.73527	9.96311	10.49456	11.67826	12.66179	13.66282	13.98104	14.46171	15.90922	16.33623	17.49299	17.67519	16.81909	18.25165	18.02613	18.0471	18.48447	18.37493	19.56828	20.27017	21.95401	22.63323	22.85025	24.11887	24.87478	0
Japan		130.10871	128.52703	123.01143	119.83792	130.34206	129.93767	129.3052	132.6851	140.37575	144.18064	151.9239	155.84368	155.58024	156.59346	162.61923	167.09879	169.63595	173.47095	170.03489	173.45118	176.80575	174.67783	173.65132	177.21972	182.0136	181.14342	179.05187	180.38656	171.31973	162.05478	170.66026	163.35727
Kiribati		5.83982	6.80982	6.67217	6.58888	4.77538	4.7071	4.14463	4.69423	4.55041	4.43683	4.31852	5.06044	4.17037	4.11154	4.07207	4.02254	3.94156	3.86334	3.77643	3.69415	4.11765	4.05097	5.0855	5.00403	4.89911	5.78977	5.6977	6.01235	5.47911	8.85848	8.74114	0
Korea, North		76.33697	77.74321	80.17555	82.44154	83.49868	86.24547	84.6185	80.35211	97.19782	78.32897	74.9147	71.8452	62.16492	56.38796	52.42131	48.23178	41.10933	37.35238	33.7941	36.44874	37.71842	38.37178	36.72104	37.66618	38.28751	39.49331	39.43111	33.63901	36.8063	34.49639	33.67746	0
Korea, South		46.12223	47.05878	46.60416	50.36694	52.8339	56.50932	62.47634	67.6641	74.30358	80.00935	89.60582	100.21461	110.19004	121.69256	130.50714	141.04402	148.36092	159.95991	149.5642	160.73236	167.27139	171.71251	179.44696	183.85729	188.25103	194.39732	196.36818	203.85484	204.36597	205.55969	221.70176	228.91575
Laos		3.98209	3.38409	3.39743	3.08324	2.69803	2.56765	2.57489	1.98948	1.81815	2.21895	2.41568	2.46933	2.43964	2.20295	2.34979	2.82656	3.25084	3.40572	4.44548	5.33749	6.38815	6.30926	6.43601	5.95335	6.40578	6.59233	6.75273	7.13282	7.61742	7.40991	7.10353	0
Macau		27.2782	25.11797	25.804	34.51733	36.35773	29.18283	39.74445	42.83903	41.38331	43.20463	43.02212	41.77294	41.82328	42.03095	47.13092	46.81251	50.91799	51.32959	54.59172	57.12358	51.20354	54.48327	58.91771	60.47027	71.34274	60.27766	70.52471	71.80805	75.94149	59.17753	54.03777	0
Malaysia		31.084	31.62797	31.83722	34.83997	40.39741	44.68351	46.54145	45.46576	46.8856	49.60143	54.78547	59.14743	60.28184	60.28529	71.95541	72.25536	78.67949	78.02009	76.82821	77.28081	85.43143	88.79183	90.27795	91.17569	88.75118	88.16319	89.48015	96.59387	97.83981	100.04849	105.69469	0
Maldives		1.39334	1.31641	1.27857	1.25264	4.79948	5.09879	6.19115	5.94651	6.13897	5.91548	6.29821	6.00405	5.90909	6.91941	13.48638	18.52311	18.12116	15.69242	16.62686	16.03955	22.1047	23.31287	41.90431	46.14163	31.43158	24.46954	32.62317	35.04498	34.03024	36.8126	36.87088	0
Mongolia		50.02196	44.31759	51.46509	51.54686	50.76519	54.51878	56.64213	58.04671	58.52897	53.51698	49.16013	56.8947	48.19287	42.57278	39.48825	40.87744	30.35161	24.4585	24.0995	23.46178	23.69956	24.09778	25.34	23.87038	25.14535	25.04245	28.24068	28.84856	30.12633	29.61104	30.04028	0
0uru		246.1738	243.88691	239.49475	235.05585	238.20387	230.71504	226.14763	221.1447	215.81461	211.8659	216.4066	212.44344	212.65288	212.71488	213.27891	217.61919	216.82591	216.5827	216.21023	216.45109	216.32053	216.27714	224.49106	224.2649	226.26771	230.3426	236.47075	252.33132	252.13116	257.48732	255.98691	0
Nepal		0.56362	0.50632	0.6334	0.69372	0.78689	0.66495	0.81843	0.9456	0.92409	0.90553	0.9486	1.12521	1.17469	1.10151	1.27362	1.38734	1.52007	1.59846	2.09193	2.34217	2.3392	2.45198	2.27019	2.34211	2.36257	2.56012	2.46516	2.50912	2.49926	2.76508	2.91385	0
New Caledonia		197.64267	186.06252	143.90791	121.59484	144.04388	148.39144	143.50963	137.5001	147.32121	158.36541	147.38275	147.00965	147.55021	140.96121	138.65664	137.8812	139.54316	127.1735	127.91022	128.07529	140.82632	135.65809	147.04144	148.58746	155.57499	151.15143	172.05778	171.35086	182.71208	170.76263	169.86365	0
New Zealand		156.96779	154.74004	156.3515	162.1912	170.81565	173.0757	186.66194	187.5713	200.62978	199.65896	206.81216	205.49707	200.96682	204.88853	214.98412	213.16338	207.87059	210.03868	205.39938	214.4292	217.26739	217.77335	218.99897	213.40846	218.71837	208.68249	210.55713	208.50923	204.22322	199.92208	201.63898	201.47145
Niue		21.5	21.5	21.5	21.5	21.5	21.5	21.78678	21.78678	21.72725	21.78678	21.78678	21.78678	21.72725	21.71837	21.78678	21.78678	21.72725	21.78678	21.78678	21.78678	21.72725	20.55356	20.45707	20.26677	20.06286	28.53073	35.91281	42.06731	31.23559	34.0753	34.0753	0
Pakistan		7.40921	7.53045	8.31005	8.17608	8.24692	8.54655	8.86284	9.26924	9.62667	9.82881	9.90254	10.21437	10.48303	10.64359	11.72576	11.78452	12.10102	11.96146	11.86252	12.15907	12.11132	11.47541	11.31465	11.71779	11.8295	12.63648	13.83071	14.13994	13.88455	13.79778	13.8808	0
Papua New Guinea		10.1971	9.91481	9.64917	9.68906	10.6453	10.88207	10.822	11.48693	10.53776	10.53371	10.39653	10.04925	10.28042	10.02986	9.46979	10.73369	10.86035	9.99871	9.79478	9.65202	9.46911	9.27247	11.99687	13.35989	12.89576	12.79919	13.0173	12.84374	14.43606	9.72532	9.65966	0
Philippines		10.86123	10.27255	10.0968	9.54079	8.93744	8.42016	8.31576	9.08862	9.51112	10.37459	10.41766	10.16417	10.56141	10.65594	11.87975	12.46042	12.92	13.36449	13.40596	13.99529	14.03023	13.55056	13.50826	13.65549	13.69743	13.44385	13.06958	12.52706	12.52307	11.66969	12.18561	0
Samoa		9.10902	9.55245	10.63513	10.64522	13.83035	11.23325	11.45583	11.30627	11.23864	11.90992	12.39019	12.3294	12.78263	12.67583	12.0838	12.82586	12.93385	13.00908	13.1877	13.37717	13.26346	13.95788	15.07428	14.50704	14.51639	15.12284	14.77105	14.92873	14.87695	14.99512	14.95858	0
Singapore		182.98486	182.52957	184.91402	181.22371	187.28674	181.11347	208.04111	226.82131	235.78067	247.79027	263.98033	272.72001	299.31138	287.70014	338.50543	333.71445	369.84026	386.17349	388.90785	375.84868	375.71208	388.73186	374.22119	385.411	423.04274	442.22276	441.98718	468.76705	513.2406	574.62182	656.0072	0
Solomon Islands		6.3527	8.72089	7.63788	8.18494	7.95424	6.71596	6.51709	7.28416	7.73835	7.78941	7.68021	7.4407	7.06402	6.32228	6.41925	6.45952	6.25152	6.08604	5.91155	5.74509	5.77419	5.63191	5.67367	5.52381	5.53241	5.93547	5.36432	5.82041	5.50922	4.98678	5.36081	0
Sri Lanka		5.86463	5.83348	5.96279	5.79104	6.81706	6.04897	6.12797	6.33974	6.01557	5.72197	6.26463	6.19257	6.22781	6.81358	7.69729	8.16853	8.04532	8.78499	9.0332	9.57069	9.94561	9.67877	9.68823	10.17853	9.99544	10.91873	10.65793	10.84211	10.7334	10.72928	10.80506	0
Taiwan		62.57435	58.88211	57.84976	64.90608	73.99849	75.31705	79.56948	84.19149	89.98798	94.84245	99.98248	101.58371	106.03772	101.51417	122.27348	133.12745	141.35122	146.75659	154.15082	161.1426	171.66567	172.62328	182.0919	188.82205	194.27951	195.13761	200.15353	201.30673	198.40546	194.94122	208.84502	0
Thailand		10.7997	11.3586	10.89606	11.42317	12.4768	13.67031	13.85774	14.98453	16.90778	19.71938	22.72789	24.50578	25.88259	27.45637	32.15299	35.94805	41.11028	43.07095	40.03565	40.73636	41.54362	43.1606	46.64891	50.65562	53.95965	56.84951	57.29125	58.93065	60.27752	61.43488	65.19501	0
Timor-Leste (East Timor)		0	0	0	0	0	0	0	0	0	0	0	0	0	0	0	0	0	0	0	0	0	0	0	2.40131	2.57343	2.53317	2.53765	4.54032	4.61492	2.47273	2.4133	0
Tonga		4.72731	6.88841	6.38479	6.80789	6.80229	7.02479	6.99686	10.22267	12.05867	12.97892	12.94561	14.71739	14.6049	14.53686	17.0223	16.98788	18.71527	19.13288	18.51798	18.38893	18.66112	17.6354	15.67159	15.5738	16.67886	20.11667	23.66978	24.13631	24.10968	23.95063	23.87286	0
U.S. Pacific Islands		0	0	0	0	0	0	0	0	0	0	0	0	0	0	0	0	0	0	0	0	0	0	0	0	0	0	0	0	0	0	0	0
Vanuatu		14.73572	12.50644	12.19	11.50066	11.78329	12.38774	12.09585	11.2234	12.90979	11.21059	11.47459	8.80718	5.68107	5.29566	5.44733	5.33387	5.21239	5.12475	5.02803	4.93637	6.16275	6.01825	6.30128	6.13993	6.14708	6.40883	6.07149	6.88458	6.08591	7.30061	7.13766	0
Viet0m		3.19012	3.08748	3.26929	3.24194	3.27562	3.56912	3.11691	3.50219	3.12204	3.68381	3.93456	4.09166	4.16905	4.67242	5.05796	6.46682	7.5669	7.67441	7.92812	8.74449	9.2965	10.13774	11.0989	11.88591	12.77844	13.89668	15.31078	16.39175	18.67827	18.92786	20.82052	0
