# Supplementary material
Source: MDPI journal article supplement (https://www.mdpi.com/1099-4300/15/12/5565)
Supplement: s2 [file s2 › Sources/Figure 3b/README.txt]

Figure_3b is plotted by Qin Liu (qinliu.christoph@gmail.com).

Comments on .csv files:
- Global_pop.csv contains population data for all countries, which is same with Population_(Millions).xls in /Raw Data but has deleted data for regions and replaced all 'NA' by 0s.
- Global_ectot.csv contains energy consumption data for all countries, which is same with Total_Primary_Consumption_(Quadrillion_Btu).xls in /Raw Data but has deleted data for regions and replaced all 'NA' by 0s.
- Global_ecpercap.csv contains energy consumption per capita data for all countries, which is calculated using Global_pop and Global_ectot. Consumption Per Capita for A=(Energy Consumption of A)/(Population of A).
