# Supplementary material
Source: MDPI journal article supplement (https://www.mdpi.com/1099-4300/15/12/5565)
Supplement: s2 [file s2 › Sources/Figure 4/Figure_4b.csv]

		1980 empirical population	1980 theoretical population	1990 empirical	1990 theoretical	2000 empirical	2000 theoretical	2010 empirical	2010 theoretical	year	*Cumulative energy consumption data are input when solving for theoretical population data	1980 cumulative energy consumption	1990 cumulative energy consumption	2000 cumulative energy consumption	2010 cumulative energy consumption
Antarctica		0	0	0.00E+00	0	0.00E+00	0	0.00E+00	0	1980		0	0.00E+00	0.00E+00	0.00E+00
Aruba		0	0	0.00E+00	0	0.00E+00	0	0.00E+00	0	1981		0	0.00E+00	0.00E+00	0.00E+00
Turks and Caicos Islands		0	0	0.00E+00	0	0.00E+00	0	0.00E+00	0	1982		0	0.00E+00	0.00E+00	0.00E+00
Bosnia and Herzegovi0		0	0	0.00E+00	0	0.00E+00	0	0.00E+00	0	1983		0	0.00E+00	0.00E+00	0.00E+00
Croatia		0	0	0.00E+00	0	0.00E+00	0	0.00E+00	0	1984		0	0.00E+00	0.00E+00	0.00E+00
Czech Republic		0	0	0.00E+00	0	0.00E+00	0	0.00E+00	0	1985		0	0.00E+00	0.00E+00	0.00E+00
Former Serbia and Montenegro		0	0	0.00E+00	0	0.00E+00	0	0.00E+00	0	1986		0	0.00E+00	0.00E+00	0.00E+00
Germany		0	0	0.00E+00	0	0.00E+00	0	0.00E+00	0	1987		0	0.00E+00	0.00E+00	0.00E+00
Macedonia		0	0	0.00E+00	0	0.00E+00	0	0.00E+00	0	1988		0	0.00E+00	0.00E+00	0.00E+00
Montenegro		0	0	0.00E+00	0	0.00E+00	0	0.00E+00	0	1989		0	0.00E+00	0.00E+00	0.00E+00
Serbia		0	0	0.00E+00	0	0.00E+00	0	0.00E+00	0	1990		0	0.00E+00	0.00E+00	0.00E+00
Slovakia		0	0	0.00E+00	0	0.00E+00	0	0.00E+00	0	1991		0	0.00E+00	0.00E+00	0.00E+00
Slovenia		0	0	0.00E+00	0	0.00E+00	0	0.00E+00	0	1992		0	0.00E+00	0.00E+00	0.00E+00
Armenia		0	0	0.00E+00	0	0.00E+00	0	0.00E+00	0	1993		0	0.00E+00	0.00E+00	0.00E+00
Azerbaijan		0	0	0.00E+00	0	0.000229045	0.0213	0.00013484	0.0163	1994		0	0.00E+00	0.000229045	0.00013484
Belarus		0	0	0.00E+00	0	0.000288637	0.0239	0.000148571	0.0173	1995		0	0.00E+00	0.000288637	0.000148571
Estonia		0	0	0.00E+00	0	0.000313583	0.02496	0.000160499	0.0178	1996		0	0.00E+00	0.000313583	0.000160499
Georgia		0	0	0.00E+00	0	0.000327056	0.0254	0.000224981	0.02114	1997		0	0.00E+00	0.000327056	0.000224981
Kazakhstan		0	0	0.00E+00	0	0.000364826	0.0269	0.000492898	0.03124	1998		0	0.00E+00	0.000364826	0.000492898
Kyrgyzstan		0	0	0.00E+00	0	0.000446865	0.0298	0.000543805	0.0328	1999		0	0.00E+00	0.000446865	0.000543805
Latvia		0	0	0.00E+00	0	0.00048841	0.0311	0.000765124	0.0389	2000		0	0.00E+00	0.00048841	0.000765124
Lithuania		0	0	0.00E+00	0	0.000519256	0.032	0.000825081	0.0403	2001		0	0.00E+00	0.000519256	0.000825081
Moldova		0	0	0.00E+00	0	0.0007485	0.0385	0.000947502	0.0432	2002		0	0.00E+00	0.0007485	0.000947502
Russia		0	0	0.00E+00	0	0.000893981	0.042	0.000962251	0.0435	2003		0	0.00E+00	0.000893981	0.000962251
Tajikistan		0	0	0.00E+00	0	0.000950848	0.0433	0.001010182	0.04436	2004		0	0.00E+00	0.000950848	0.001010182
Turkmenistan		0	0	0.00E+00	0	0.001028163	0.045	0.001015314	0.04437	2005		0	0.00E+00	0.001028163	0.001015314
Ukraine		0	0	0.00E+00	0	0.00105036	0.0455	0.001018957	0.04439	2006		0	0.00E+00	0.00105036	0.001018957
Uzbekistan		0	0	0.00E+00	0	0.001195466	0.0485	0.001254339	0.0496	2007		0	0.00E+00	0.001195466	0.001254339
Palestinian Territories		0	0	0.00E+00	0	0.001210864	0.0488	0.001419578	0.0528	2008		0	0.00E+00	0.001210864	0.001419578
Eritrea		0	0	0.00E+00	0	0.001214263	0.0489	0.001480241	0.0539	2009		0	0.00E+00	0.001214263	0.001480241
0mibia		0	0	0.00E+00	0	0.001268656	0.0499	0.001525468	0.05472	2010		0	0.00E+00	0.001268656	0.001525468
Saint Hele0		0	0	0.00E+00	0	0.00127778	0.0501	0.001536378	0.055			0	0.00E+00	0.00127778	0.001536378
Hawaiian Trade Zone		0	0	0.00E+00	0	0.001363044	0.0518	0.001740969	0.0584			0	0.00E+00	0.001363044	0.001740969
Timor-Leste (East Timor)		0	0	0.00E+00	0	0.001423235	0.0529	0.00175423	0.0586			0	0.00E+00	0.001423235	0.00175423
U.S. Pacific Islands		0	0	0.00E+00	0	0.001437934	0.0531	0.00179407	0.0592			0	0.00E+00	0.001437934	0.00179407
Bhutan		0.0001	0	0.000127888	0.016	0.001707798	0.0579	0.001913906	0.0612			5.29973E-07	0.000127888	0.001707798	0.001913906
Burundi		0.0011	3.41E-03	0.000143726	0.0169	0.001741168	0.0584	0.002385473	0.0683			6.14769E-06	0.000143726	0.001741168	0.002385473
Nepal		0.0044	8.37E-03	0.000168119	0.0183	0.002159862	0.065	0.003814395	0.086			3.53669E-05	0.000168119	0.002159862	0.003814395
Cambodia		0.0059	1.01E-02	0.000321902	0.0253	0.002220504	0.0659	0.003833845	0.0862			5.14428E-05	0.000321902	0.002220504	0.003833845
Rwanda		0.0071	1.13E-02	0.000378	0.0274	0.002232628	0.066	0.003839721	0.0863			6.39502E-05	0.000378	0.002232628	0.003839721
Ethiopia		0.0152	1.84E-02	0.000390254	0.0278	0.003492085	0.0824	0.00427037	0.091			0.000170263	0.000390254	0.003492085	0.00427037
Chad		0.0162	1.91E-02	0.000439328	0.0295	0.00349296	0.0825	0.004512882	0.0935			0.000184643	0.000439328	0.00349296	0.004512882
Burki0 Faso		0.0176	2.02E-02	0.000482391	0.0309	0.003525506	0.0828	0.006450097	0.1114			0.000206301	0.000482391	0.003525506	0.006450097
Mali		0.0192	2.14E-02	0.000541234	0.0327	0.003580273	0.0834	0.006694685	0.1135			0.000231175	0.000541234	0.003580273	0.006694685
Central African Republic		0.0197	2.19E-02	0.000549471	0.033	0.003935826	0.0874	0.006864391	0.1148			0.000240856	0.000549471	0.003935826	0.006864391
Uganda		0.0224	2.43E-02	0.000584124	0.034	0.004139099	0.0896	0.006953004	0.1156			0.000297174	0.000584124	0.004139099	0.006953004
Maldives		0.0224	2.43E-02	0.000626233	0.0352	0.00439089	0.0922	0.006956432	0.1156			0.000297916	0.000626233	0.00439089	0.006956432
Bangladesh		0.0422	3.85E-02	0.000651926	0.0359	0.00439714	0.0923	0.007559568	0.1206			0.000750054	0.000651926	0.00439714	0.007559568
Niger		0.0436	3.85E-02	0.000692763	0.0369	0.004400089	0.0923	0.007566717	0.1207			0.000782382	0.000692763	0.004400089	0.007566717
Lesotho		0.0439	3.95E-02	0.000733283	0.038	0.004449533	0.0928	0.007920819	0.123			0.000789873	0.000733283	0.004449533	0.007920819
Guinea-Bissau		0.044	3.96E-02	0.000980822	0.0439	0.004535721	0.0934	0.00806506	0.1243			0.000794218	0.000980822	0.004535721	0.00806506
Afghanistan		0.0474	4.19E-02	0.001138334	0.0465	0.006558977	0.1127	0.008446369	0.1272			0.000889543	0.001138334	0.006558977	0.008446369
Comoros		0.0475	4.19E-02	0.00187075	0.061	0.006718105	0.1135	0.008501017	0.1275			0.000891769	0.00187075	0.006718105	0.008501017
Malawi		0.0489	4.29E-02	0.001900143	0.061	0.006945425	0.1152	0.008502722	0.1275			0.000933884	0.001900143	0.006945425	0.008502722
Benin		0.0497	4.34E-02	0.00209933	0.0641	0.006953374	0.116	0.008617465	0.1284			0.000957168	0.00209933	0.006953374	0.008617465
Burma (Myanmar)		0.0572	4.86E-02	0.002406493	0.0684	0.007310477	0.1184	0.008886184	0.1303			0.001202722	0.002406493	0.007310477	0.008886184
Tanzania		0.0614	5.13E-02	0.002409903	0.0684	0.007642357	0.121	0.009332405	0.13345			0.001340621	0.002409903	0.007642357	0.009332405
Madagascar		0.0633	5.26E-02	0.00243973	0.0685	0.007653181	0.1215	0.009343218	0.1335			0.001407432	0.00243973	0.007653181	0.009343218
Sudan and South Sudan		0.0677	5.59E-02	0.002447562	0.0685	0.009493136	0.1346	0.009347037	0.1336			0.001592004	0.002447562	0.009493136	0.009347037
Haiti		0.0689	5.68E-02	0.002490393	0.0699	0.009607046	0.1353	0.009436845	0.1342			0.001645002	0.002490393	0.009607046	0.009436845
Somalia		0.0702	5.78E-02	0.002553572	0.071	0.009610495	0.1353	0.0118213	0.1498			0.001703511	0.002553572	0.009610495	0.0118213
Guinea		0.0712	5.86E-02	0.002577097	0.0711	0.009858562	0.1374	0.011855167	0.15			0.001752056	0.002577097	0.009858562	0.011855167
Congo (Kinshasa)		0.0778	6.37E-02	0.002588311	0.0712	0.010331949	0.14	0.012446374	0.1536			0.002072584	0.002588311	0.010331949	0.012446374
Sierra Leone		0.0785	6.43E-02	0.003353125	0.0813	0.010340948	0.14	0.01258803	0.1544			0.00210993	0.003353125	0.010340948	0.01258803
Viet0m		0.0906	7.28E-02	0.003357345	0.0813	0.010825059	0.1433	0.017601802	0.1817			0.002715371	0.003357345	0.010825059	0.017601802
Equatorial Guinea		0.0906	7.28E-02	0.003358241	0.0813	0.010963465	0.1446	0.018070411	0.184			0.002718374	0.003358241	0.010963465	0.018070411
Gambia, The		0.0908	7.29E-02	0.003363241	0.0813	0.015578151	0.1761	0.018391018	0.1855			0.002726288	0.003363241	0.015578151	0.018391018
Togo		0.0914	7.34E-02	0.00346795	0.0823	0.048906938	0.296	0.018396639	0.1856			0.002760242	0.00346795	0.048906938	0.018396639
Laos		0.0921	7.40E-02	0.003827222	0.0859	0.048912787	0.296	0.018814576	0.1875			0.002806561	0.003827222	0.048912787	0.018814576
Tonga		0.0921	7.40E-02	0.004052391	0.0864	0.049127784	0.2965	0.018946341	0.188			0.002808081	0.004052391	0.049127784	0.018946341
Cameroon		0.0941	7.61E-02	0.004357676	0.0919	0.051976304	0.3046	0.019204855	0.1894			0.002974599	0.004357676	0.051976304	0.019204855
Nigeria		0.1109	9.30E-02	0.004361606	0.0919	0.052370077	0.3057	0.01920511	0.1894			0.004466579	0.004361606	0.052370077	0.01920511
Sao Tome and Principe		0.111	9.30E-02	0.004651688	0.0954	0.052410996	0.3057	0.062140337	0.3311			0.004468487	0.004651688	0.052410996	0.062140337
Kiribati		0.111	9.30E-02	0.004876222	0.0967	0.053528373	0.3087	0.062384044	0.3318			0.004469688	0.004876222	0.053528373	0.062384044
Sri Lanka		0.1144	9.62E-02	0.004915412	0.0973	0.053780389	0.3096	0.06603694	0.3408			0.004781666	0.004915412	0.053780389	0.06603694
India		0.2683	0.188774645	0.006935206	0.1152	0.053784914	0.3096	0.067355095	0.3438			0.019058683	0.006935206	0.053784914	0.067355095
Mauritania		0.2687	0.188929945	0.006942345	0.1152	0.054315218	0.3109	0.067387747	0.3439			0.019091188	0.006942345	0.054315218	0.067387747
Kenya		0.2723	0.190594375	0.007257484	0.1184	0.063996554	0.3357	0.067843312	0.3449			0.01944143	0.007257484	0.063996554	0.067843312
Solomon Islands		0.2724	0.190618936	0.007488203	0.1199	0.064001228	0.3357	0.067848248	0.3449			0.019446624	0.007488203	0.064001228	0.067848248
Dominica		0.2724	0.190626951	0.007543896	0.1199	0.064405974	0.3367	0.079708605	0.3717			0.019448319	0.007543896	0.064405974	0.079708605
Senegal		0.2737	0.191243612	0.007775655	0.1223	0.064530358	0.337	0.080081765	0.3725			0.019578975	0.007775655	0.064530358	0.080081765
Congo (Brazzaville)		0.2741	0.191442246	0.00777869	0.1223	0.064531333	0.337	0.080127639	0.3725			0.019621161	0.00777869	0.064531333	0.080127639
Pakistan		0.2932	0.201636596	0.030550462	0.2366	0.065852982	0.3403	0.081788573	0.3762			0.02185203	0.030550462	0.065852982	0.081788573
Gre0da		0.2932	0.201647111	0.033950927	0.249	0.065856681	0.3406	0.082394079	0.3774			0.021854398	0.033950927	0.065856681	0.082394079
Saint Vincent/Gre0dines		0.2933	0.201658563	0.034057891	0.2495	0.065856781	0.3406	0.082483065	0.3777			0.021856977	0.034057891	0.065856781	0.082483065
Gha0		0.2958	0.20300392	0.034168554	0.2499	0.065960517	0.3406	0.082487256	0.3777			0.022161111	0.034168554	0.065960517	0.082487256
Indonesia		0.3297	0.220321687	0.036128233	0.2564	0.06597709	0.3406	0.083053842	0.3788			0.026280133	0.036128233	0.06597709	0.083053842
Angola		0.3313	0.221145609	0.036283462	0.2571	0.066134894	0.3408	0.083097796	0.3789			0.026485621	0.036283462	0.066134894	0.083097796
Cote dIvoire (IvoryCoast)		0.3332	0.222187224	0.036288578	0.2571	0.066141618	0.3409	0.08327943	0.3793			0.02674665	0.036288578	0.066141618	0.08327943
Paraguay		0.3339	0.222579139	0.036315803	0.2571	0.066416932	0.3415	0.08328564	0.3793			0.026845225	0.036315803	0.066416932	0.08328564
Samoa		0.334	0.222599486	0.036487187	0.2577	0.067002229	0.343	0.083413702	0.3795			0.026850348	0.036487187	0.067002229	0.083413702
Honduras		0.3347	0.223064363	0.036493025	0.2577	0.067863664	0.3451	0.086090617	0.3851			0.026967543	0.036493025	0.067863664	0.086090617
El Salvador		0.3358	0.223064363	0.043165577	0.2792	0.067906783	0.3451	0.086322923	0.3856			0.027127489	0.043165577	0.067906783	0.086322923
Guatemala		0.3373	0.224632069	0.044058597	0.2819	0.068250537	0.346	0.087927583	0.3888			0.027364811	0.044058597	0.068250537	0.087927583
Papua New Guinea		0.3379	0.225034802	0.04452174	0.283	0.06830778	0.346	0.087927681	0.3888			0.027467378	0.04452174	0.06830778	0.087927681
Yemen		0.34	0.226362046	0.044525353	0.283	0.068399868	0.3463	0.088711119	0.3904			0.027806879	0.044525353	0.068399868	0.088711119
Thailand		0.3505	0.233234154	0.044529428	0.2831	0.071329502	0.353	0.088722617	0.3904			0.029601227	0.044529428	0.071329502	0.088722617
Philippines		0.362	0.240465954	0.044529688	0.2831	0.071390294	0.3533	0.088868151	0.3904			0.031556015	0.044529688	0.071390294	0.088868151
Morocco		0.3664	0.243351776	0.044538243	0.2831	0.071630737	0.3537	0.088875928	0.3906			0.03235525	0.044538243	0.071630737	0.088875928
Nicaragua		0.367	0.243766567	0.044573647	0.2834	0.071642511	0.3645	0.088904506	0.3909			0.032471031	0.044573647	0.071642511	0.088904506
Saint Lucia		0.367	0.243787303	0.044841243	0.284	0.076654843	0.3652	0.089299506	0.3917			0.032476825	0.044841243	0.076654843	0.089299506
Bolivia		0.3682	0.244727694	0.044844162	0.284	0.077407193	0.3666	0.090402218	0.3939			0.032740186	0.044844162	0.077407193	0.090402218
Mauritius		0.3685	0.244899577	0.045166412	0.2852	0.077410818	0.3667	0.090426703	0.3939			0.032788449	0.045166412	0.077410818	0.090426703
Mozambique		0.3712	0.247095099	0.045173435	0.2852	0.179736168	0.536	0.096904732	0.4066			0.033408376	0.045173435	0.179736168	0.096904732
Vanuatu		0.3712	0.247116509	0.046285989	0.2884	0.179880024	0.5364	0.097271369	0.4072			0.033414453	0.046285989	0.179880024	0.097271369
Cape Verde		0.3713	0.247173015	0.046291133	0.2884	0.180232577	0.5366	0.097647271	0.4079			0.033430494	0.046291133	0.180232577	0.097647271
Dominican Republic		0.3726	0.24825615	0.046692052	0.2896	0.180294194	0.5368	0.09789229	0.4085			0.033738797	0.046692052	0.180294194	0.09789229
Swaziland		0.3727	0.24838104	0.046898465	0.2902	0.180296294	0.5368	0.098140972	0.4089			0.033774446	0.046898465	0.180296294	0.098140972
Egypt		0.3823	0.256950314	0.046936123	0.2902	0.182444533	0.5395	0.100162942	0.4128			0.036270231	0.046936123	0.182444533	0.100162942
Botswa0		0.3825	0.257130828	0.047571142	0.2919	0.183042178	0.5403	0.103685328	0.4193			0.036323864	0.047571142	0.183042178	0.103685328
Saint Kitts and Nevis		0.3825	0.257139743	0.047571257	0.2919	0.186138191	0.5442	0.106623793	0.4246			0.036326514	0.047571257	0.186138191	0.106623793
Liberia		0.3829	0.257517878	0.047573916	0.2919	0.187287238	0.5458	0.107263655	0.4259			0.03643901	0.047573916	0.187287238	0.107263655
Chi0		0.6043	0.407758346	0.122720105	0.4525	0.193715707	0.5538	0.107394499	0.4261			0.097518165	0.122720105	0.193715707	0.107394499
Western Sahara		0.6043	0.407774264	0.126345798	0.4584	0.193716482	0.5538	0.107398926	0.4261			0.097526504	0.126345798	0.193716482	0.107398926
Tunisia		0.6058	0.408637084	0.126445074	0.4586	0.193743328	0.5538	0.107402001	0.4261			0.097979136	0.126445074	0.193743328	0.107402001
French Polynesia		0.6058	0.408658066	0.127178617	0.4599	0.19387666	0.554	0.107462115	0.4263			0.097990159	0.127178617	0.19387666	0.107462115
Guadeloupe		0.6059	0.408705609	0.127762279	0.4609	0.193903457	0.554	0.129594153	0.4638			0.098015138	0.127762279	0.193903457	0.129594153
Niue		0.6059	0.408705879	0.127977304	0.4611	0.201809379	0.5637	0.138388531	0.4776			0.09801528	0.127977304	0.201809379	0.138388531
Zimbabwe		0.6075	0.409745844	0.128032072	0.4612	0.203764269	0.5661	0.138624657	0.4779			0.098562636	0.128032072	0.203764269	0.138624657
Montserrat		0.6075	0.409747585	0.128046378	0.4612	0.206474383	0.5693	0.139713071	0.4796			0.098563554	0.128046378	0.206474383	0.139713071
Turkey		0.6176	0.416646382	0.128141665	0.4614	0.207037933	0.5699	0.139746174	0.4796			0.102241108	0.128141665	0.207037933	0.139746174
Cook Islands		0.6176	0.416649135	0.128221838	0.4615	0.207641253	0.5706	0.139848087	0.4798			0.102242592	0.128221838	0.207641253	0.139848087
Peru		0.6215	0.419286384	0.132377696	0.4682	0.228971562	0.5951	0.14026244	0.4805			0.103669951	0.132377696	0.228971562	0.14026244
Reunion		0.6216	0.419364058	0.134949446	0.4722	0.228973562	0.5951	0.154529856	0.5015			0.103712172	0.134949446	0.228973562	0.154529856
Ecuador		0.6234	0.4205739	0.135261493	0.4728	0.229384707	0.5954	0.157321376	0.5055			0.104371141	0.135261493	0.229384707	0.157321376
Zambia		0.6247	0.421432073	0.140964031	0.4816	0.229439975	0.5955	0.165792523	0.5174			0.104840097	0.140964031	0.229439975	0.165792523
Fiji		0.6248	0.421530783	0.140965968	0.4816	0.229846096	0.596	0.165862744	0.5175			0.104894119	0.140965968	0.229846096	0.165862744
Costa Rica		0.6253	0.421888498	0.157596654	0.506	0.230211972	0.5964	0.166403435	0.5181			0.105090032	0.157596654	0.230211972	0.166403435
Belize		0.6253	0.421912417	0.157663647	0.506	0.230499559	0.5967	0.166441238	0.5182			0.10510314	0.157663647	0.230499559	0.166441238
Colombia		0.6313	0.42637041	0.157707374	0.5061	0.231058435	0.5974	0.166503683	0.5184			0.107563487	0.157707374	0.231058435	0.166503683
Macau		0.6314	0.426414781	0.158095056	0.5067	0.231124226	0.5974	0.167360672	0.5195			0.107588149	0.158095056	0.231124226	0.167360672
Guya0		0.6316	0.426550904	0.159746561	0.5089	0.232424103	0.5988	0.167453751	0.5197			0.107663829	0.159746561	0.232424103	0.167453751
Martinique		0.6316	0.426610242	0.160045603	0.5094	0.232534413	0.5989	0.167868926	0.5203			0.107696829	0.160045603	0.232534413	0.167868926
Virgin Islands, British		0.6316	0.426612274	0.160466203	0.5101	0.23312016	0.5996	0.171777301	0.5255			0.107697959	0.160466203	0.23312016	0.171777301
Malaysia		0.6347	0.429259048	0.160468226	0.5101	0.233193325	0.5997	0.172092306	0.526			0.109176195	0.160468226	0.233193325	0.172092306
Syria		0.6366	0.430980922	0.162094732	0.5123	0.249021068	0.6166	0.172605829	0.5266			0.110144456	0.162094732	0.249021068	0.172605829
Brazil		0.6639	0.455251036	0.162219932	0.5124	0.249406317	0.617	0.172613116	0.5266			0.12435406	0.162219932	0.249406317	0.172613116
Jordan		0.6643	0.45569884	0.162287156	0.5126	0.251052847	0.6187	0.172621284	0.5266			0.124626254	0.162287156	0.251052847	0.172621284
Lebanon		0.665	0.456306626	0.163737306	0.5145	0.25358431	0.6213	0.37022197	0.7252			0.124996281	0.163737306	0.25358431	0.37022197
Uruguay		0.6656	0.456940095	0.167254302	0.5195	0.257549057	0.6253	0.372833776	0.7272			0.125382667	0.167254302	0.257549057	0.372833776
Chile		0.6681	0.459400141	0.167569354	0.5199	0.258064914	0.6259	0.379393093	0.7322			0.126890193	0.167569354	0.258064914	0.379393093
Iraq		0.6711	0.462396718	0.167570886	0.5199	0.264735925	0.6326	0.379935331	0.7326			0.128741636	0.167570886	0.264735925	0.379935331
Gabon		0.6713	0.462558468	0.170223185	0.5234	0.264806291	0.6327	0.380046607	0.7327			0.128842048	0.170223185	0.264806291	0.380046607
Iran		0.6802	0.471444634	0.170282808	0.5235	0.277356645	0.645	0.380072149	0.7328			0.134433653	0.170282808	0.277356645	0.380072149
Algeria		0.6844	0.475853439	0.179251421	0.5355	0.277390865	0.645	0.380708897	0.7332			0.13726318	0.179251421	0.277390865	0.380708897
Portugal		0.6866	0.478205258	0.182082849	0.5391	0.282277015	0.6498	0.380710876	0.7332			0.138787701	0.182082849	0.282277015	0.380710876
Korea, South		0.6952	0.48762448	0.195541101	0.556	0.283351147	0.6508	0.381485695	0.7338			0.145000258	0.195541101	0.283351147	0.381485695
Cuba		0.6973	0.490027123	0.196208026	0.5569	0.284094298	0.6515	0.381556406	0.7339			0.146612542	0.196208026	0.284094298	0.381556406
Seychelles		0.6974	0.490043703	0.201624355	0.5634	0.285033173	0.6523	0.381597285	0.7339			0.146623707	0.201624355	0.285033173	0.381597285
Mongolia		0.6977	0.490479725	0.20168762	0.5636	0.28997714	0.657	0.383802318	0.7355			0.146917524	0.20168762	0.28997714	0.383802318
Malta		0.6978	0.49057864	0.201727359	0.5636	0.290036582	0.657	0.385861426	0.7371			0.14698423	0.201727359	0.290036582	0.385861426
Jamaica		0.6983	0.49119647	0.201780538	0.5637	0.291039248	0.658	0.393804692	0.743			0.147401319	0.201780538	0.291039248	0.393804692
Hong Kong		0.6995	0.49261789	0.203086355	0.5652	0.300099167	0.6663	0.395321855	0.7441			0.14836375	0.203086355	0.300099167	0.395321855
Mexico		0.7148	0.51145914	0.207514376	0.5711	0.300117289	0.6663	0.401175535	0.7484			0.161501607	0.207514376	0.300117289	0.401175535
Oman		0.7151	0.511777965	0.209675353	0.573	0.300215251	0.6664	0.401311354	0.7485			0.161730096	0.209675353	0.300215251	0.401311354
Barbados		0.7151	0.511849214	0.210197454	0.5737	0.302770986	0.6688	0.402818567	0.7495			0.161781185	0.210197454	0.302770986	0.402818567
Argenti0		0.7215	0.519839962	0.210224939	0.5737	0.314228785	0.679	0.402836998	0.7495			0.16757736	0.210224939	0.314228785	0.402836998
Albania		0.7221	0.520584444	0.210324764	0.5738	0.314249033	0.679	0.403074907	0.7498			0.168124116	0.210324764	0.314249033	0.403074907
Taiwan		0.7261	0.525911382	0.211192207	0.5748	0.316924876	0.6813	0.413051837	0.7568			0.172070119	0.211192207	0.316924876	0.413051837
Cyprus		0.7263	0.526110242	0.211280327	0.5748	0.319554876	0.684	0.424007138	0.765			0.172218582	0.211280327	0.319554876	0.424007138
Djibouti		0.7264	0.526214549	0.211298535	0.575	0.321723912	0.6855	0.426222925	0.766			0.172296488	0.211298535	0.321723912	0.426222925
Israel		0.7275	0.527870636	0.212762471	0.5767	0.321981678	0.6858	0.427084106	0.7667			0.173536484	0.212762471	0.321981678	0.427084106
French Guia0		0.7275	0.527870636	0.223864344	0.5894	0.323083256	0.6867	0.444923875	0.7787			0.17355468	0.223864344	0.323083256	0.444923875
Korea, North		0.7314	0.534089748	0.234047475	0.6006	0.327666421	0.6907	0.451428778	0.783			0.178245083	0.234047475	0.327666421	0.451428778
Former Yugoslavia		0.7363	0.541712104	0.240215757	0.6073	0.342041432	0.7025	0.454057017	0.7847			0.184129445	0.240215757	0.342041432	0.454057017
Greece		0.7385	0.5450999	0.240417112	0.6075	0.348962786	0.7084	0.468994108	0.7943			0.186785352	0.240417112	0.348962786	0.468994108
Spain		0.7469	0.55850112	0.240434684	0.6075	0.348981533	0.7084	0.470845843	0.7954			0.197540556	0.240434684	0.348981533	0.470845843
Cayman Islands		0.7469	0.558507343	0.251772508	0.6195	0.35099539	0.71	0.475263139	0.7982			0.197545644	0.251772508	0.35099539	0.475263139
Falkland Islands (Islas Malvi0s)		0.7469	0.558508078	0.257632153	0.6254	0.35256988	0.7113	0.48748463	0.8058			0.197546245	0.257632153	0.35256988	0.48748463
Antigua and Barbuda		0.7469	0.558533919	0.258162723	0.626	0.355914435	0.7139	0.488714935	0.8065			0.197567373	0.258162723	0.355914435	0.488714935
South Africa		0.7535	0.570134976	0.261164004	0.6291	0.355926683	0.7139	0.490360199	0.8075			0.207206807	0.261164004	0.355926683	0.490360199
Pa0ma		0.754	0.570901782	0.272580641	0.6404	0.37487871	0.7288	0.490378905	0.8075			0.207854893	0.272580641	0.37487871	0.490378905
Ireland		0.7547	0.570901782	0.273643225	0.6414	0.376906715	0.7303	0.491891152	0.8085			0.208996243	0.273643225	0.376906715	0.491891152
Venezuela		0.758	0.578797084	0.279674544	0.6473	0.376926312	0.7303	0.509351395	0.8189			0.214607952	0.279674544	0.376926312	0.509351395
Italy		0.7707	0.602975102	0.283088911	0.6505	0.37694561	0.7303	0.509381109	0.8189			0.236220857	0.283088911	0.37694561	0.509381109
Hungary		0.7731	0.607573672	0.302521113	0.6685	0.390797615	0.7408	0.511007903	0.8198			0.24049555	0.302521113	0.390797615	0.511007903
Suri0me		0.7732	0.607726915	0.310656704	0.6759	0.394312672	0.7434	0.51103419	0.8198			0.240638925	0.310656704	0.394312672	0.51103419
Romania		0.7782	0.617972844	0.312130987	0.6771	0.394313647	0.7434	0.511640479	0.8202			0.250362024	0.312130987	0.394313647	0.511640479
Libya		0.7789	0.619429204	0.312153732	0.6772	0.395165759	0.744	0.511655718	0.8202			0.251766205	0.312153732	0.395165759	0.511655718
Japan		0.8051	0.67118915	0.315565382	0.6802	0.395240099	0.744	0.511673209	0.8202			0.305461845	0.315565382	0.395240099	0.511673209
Puerto Rico		0.8059	0.672544944	0.315588128	0.6802	0.395730858	0.7444	0.51478992	0.822			0.306972657	0.315588128	0.395730858	0.51478992
Poland		0.8139	0.688241339	0.315660063	0.6803	0.397693047	0.7458	0.514885252	0.8221			0.324878541	0.315660063	0.397693047	0.514885252
Bermuda		0.8139	0.688265377	0.317883553	0.6822	0.398425	0.7464	0.517363413	0.8235			0.324906559	0.317883553	0.398425	0.517363413
Austria		0.8156	0.691571758	0.317894998	0.6822	0.39845872	0.7464	0.538959598	0.8357			0.328778083	0.317894998	0.39845872	0.538959598
Bulgaria		0.8176	0.695519253	0.321261187	0.6852	0.399959195	0.7475	0.53904357	0.8357			0.333446758	0.321261187	0.399959195	0.53904357
France		0.83	0.71961986	0.375503897	0.7293	0.39996182	0.7475	0.581690646	0.8584			0.363085964	0.375503897	0.39996182	0.581690646
Faroe Islands		0.83	0.719638281	0.401880004	0.7489	0.402152578	0.7491	0.608989061	0.8721			0.363109389	0.401880004	0.402152578	0.608989061
New Zealand		0.8307	0.72101814	0.401906825	0.7489	0.42647219	0.7663	0.609425841	0.8723			0.364867522	0.401906825	0.42647219	0.609425841
United Kingdom		0.8433	0.744676841	0.428699977	0.7678	0.446056583	0.7795	0.611899477	0.8735			0.396103219	0.428699977	0.446056583	0.611899477
Greenland		0.8434	0.744697311	0.428818935	0.7678	0.446175292	0.7795	0.614890613	0.8749			0.396131166	0.428818935	0.446175292	0.614890613
Trinidad and Tobago		0.8436	0.745147636	0.428842258	0.7678	0.44963968	0.7818	0.616698767	0.8758			0.396746394	0.428842258	0.44963968	0.616698767
Saudi Arabia		0.8459	0.749420068	0.432256018	0.7702	0.459159238	0.788	0.618378231	0.8766			0.402623125	0.432256018	0.459159238	0.618378231
Denmark		0.847	0.751616397	0.43225703	0.7702	0.495179617	0.8104	0.618380621	0.8766			0.405672449	0.43225703	0.495179617	0.618380621
Former U.S.S.R.		0.9068	0.852812856	0.432910979	0.7706	0.551208807	0.8424	0.675814415	0.9026			0.570794868	0.432910979	0.551208807	0.675814415
Switzerland		0.9082	0.854905877	0.46603059	0.7924	0.616548457	0.8757	0.685274883	0.9067			0.574820155	0.46603059	0.616548457	0.685274883
Former Czechoslovakia		0.9117	0.859884635	0.47442927	0.7977	0.619789975	0.8773	0.685276195	0.9067			0.584517427	0.47442927	0.619789975	0.685276195
American Samoa		0.9117	0.859895295	0.47450424	0.7977	0.647180853	0.89	0.70639672	0.9154			0.584538378	0.47450424	0.647180853	0.70639672
Singapore		0.9122	0.860688218	0.476544641	0.799	0.647182728	0.89	0.70641807	0.9154			0.586099008	0.476544641	0.647182728	0.70641807
Germany, West		0.9261	0.880165147	0.486219051	0.805	0.647344956	0.89	0.706420323	0.9154			0.625918645	0.486219051	0.647344956	0.706420323
Australia		0.9293	0.884691931	0.496036841	0.8109	0.64735028	0.89	0.710772725	0.9172			0.635609451	0.496036841	0.64735028	0.710772725
New Caledonia		0.9294	0.884736988	0.497326907	0.8117	0.649415355	0.891	0.713325181	0.9181			0.63570679	0.497326907	0.649415355	0.713325181
Finland		0.9304	0.88632174	0.497355664	0.8118	0.649440902	0.891	0.713329823	0.91815			0.639141652	0.497355664	0.649440902	0.713329823
Belgium		0.9327	0.8897	0.67358196	0.9017	0.661571187	0.8964	0.713534277	0.9182			0.646434895	0.67358196	0.661571187	0.713534277
Germany, East		0.9364	0.8954	0.673587885	0.9017	0.664612307	0.8978	0.721890661	0.9276			0.659132309	0.673587885	0.664612307	0.721890661
Netherlands		0.9396	0.9004	0.684320776	0.9062	0.674094619	0.9019	0.72727342	0.9237			0.670456139	0.684320776	0.674094619	0.72727342
0uru		0.9396	0.9004	0.690647119	0.9089	0.674192806	0.9019	0.738656569	0.9281			0.670462852	0.690647119	0.674192806	0.738656569
Iceland		0.9397	0.9005	0.700217918	0.9129	0.686274573	0.9071	0.740354818	0.9287			0.67066244	0.700217918	0.686274573	0.740354818
Sweden		0.9415	0.9036	0.703442838	0.9142	0.691950842	0.9095	0.755728864	0.9344			0.677991968	0.703442838	0.691950842	0.755728864
Gibraltar		0.9415	0.9036	0.709855971	0.9168	0.698784432	0.9123	0.94776596	0.9909			0.678018042	0.709855971	0.698784432	0.94776596
United Arab Emirates		0.9418	0.904	0.712180703	0.9177	0.699835667	0.9127	0.948055442	0.9909			0.678962489	0.712180703	0.699835667	0.948055442
Bahamas, The		0.9418	0.9041	0.712383763	0.9178	0.946839028	0.9906	0.973520495	0.9959			0.679174125	0.712383763	0.946839028	0.973520495
Norway		0.9427	0.9061	0.712610147	0.9179	0.947223577	0.9907	0.973909776	0.996			0.683912191	0.712610147	0.947223577	0.973909776
United States		0.9938	0.9933	0.956782979	0.9927	0.951039669	0.9915	0.97756941	1			0.959733807	0.956782979	0.951039669	0.97756941
Kuwait		0.9941	0.9936	0.957201296	0.9928	0.951339379	0.9916	0.978661585	1			0.961432866	0.957201296	0.951339379	0.978661585
Saint Pierre and Miquelon		0.9941	0.9936	0.988937606	1	0.984597051	1	0.981175571	1			0.961440639	0.988937606	0.984597051	0.981175571
Luxembourg		0.9942	0.9937	0.993880648	1	0.989567514	1	0.983339119	1			0.961942206	0.993880648	0.989567514	0.983339119
Bahrain		0.9943	0.9938	0.994621532	1	0.991841286	1	0.989943898	1			0.962428085	0.994621532	0.991841286	0.989943898
Ca0da		0.9998	1	0.994631907	1	0.992753015	1	0.990346263	1			0.997041902	0.994631907	0.992753015	0.990346263
Brunei		0.9998	1	0.998184827	1	0.997418144	1	0.997272609	1			0.997331691	0.998184827	0.997418144	0.997272609
Guam		0.9999	1	0.998247976	1	0.997807917	1	0.997594548	1			0.997519973	0.998247976	0.997807917	0.997594548
Qatar		0.9999	1	0.998674964	1	0.999419602	1	0.9994284	1			0.998277128	0.998674964	0.999419602	0.9994284
Netherlands Antilles		1	1	0.99966489	1	0.999766156	1	0.999875267	1			0.999117347	0.99966489	0.999766156	0.999875267
Virgin Islands, U.S.		1	1									1	1	1	1
