# Supplementary material
Source: MDPI journal article supplement (https://www.mdpi.com/1099-4300/15/12/5565)
Supplement: s2 [file s2 › Sources/Figure 5a/Figure 5a.csv]

	Gini Coefficient of Global Energy Consumption
1980	0.663476976239104
1981	0.660218551795623
1982	0.654752020706956
1983	0.652258966308668
1984	0.651920570162977
1985	0.651346835142278
1986	0.648542890659139
1987	0.648599043056367
1988	0.646682874018466
1989	0.645158153964026
1990	0.643389288356512
1991	0.638173169120753
1992	0.638401097165495
1993	0.640670067271526
1994	0.627675432330636
1995	0.622553122076622
1996	0.623023004013054
1997	0.617638659157221
1998	0.615819803095581
1999	0.61628626771693
2000	0.615594994042538
2001	0.610396099217546
2002	0.607278114146774
2003	0.601411775252475
2004	0.595712455975313
2005	0.58515552890364
2006	0.576442346903113
2007	0.572934385177683
2008	0.566069345113837
2009	0.553347567197424
2010	0.554701041770936
