# Supplementary material
Source: MDPI journal article supplement (https://www.mdpi.com/1099-4300/15/12/5565)
Supplement: s2 [file s2 › Sources/Figure 5b/Figure 5b.csv]

	Gini Coefficient of Global CO2 Emission
1980	0.645232548703457
1981	0.642197816210251
1982	0.635493265897274
1983	0.632616587725222
1984	0.631477538681953
1985	0.629952082855294
1986	0.625838120781693
1987	0.625318830146765
1988	0.624629839180781
1989	0.621265723206454
1990	0.618928567127634
1991	0.610741027907449
1992	0.609385078944375
1993	0.602863780920974
1994	0.595692406890566
1995	0.58750170030851
1996	0.590162261438705
1997	0.584516202733391
1998	0.582893380575803
1999	0.583678121383863
2000	0.584770880535448
2001	0.581666758148569
2002	0.577489528989781
2003	0.574742441936382
2004	0.5683890774936
2005	0.558460230737374
2006	0.550437941597824
2007	0.545783155213158
2008	0.538899872440868
2009	0.524730329873643
2010	0.528509342878496
