# Supplementary material
Source: MDPI journal article supplement (https://www.mdpi.com/1099-4300/15/12/5565)
Supplement: s2 [file s2 › Sources/Figure 6a/Figure 6a.csv]

2010 CO2 emission per capita (Metric tons per year per capita)	2010 Cumulative fraction of world population
0.0201508244855583	0.998562867323139
0.0240964541051989	0.997026603859531
0.0448890779254041	0.986848732011687
0.0478309438433861	0.984723933231491
0.0624806603010196	0.982473113305767
0.0688071071040288	0.980862171724125
0.0702961652696737	0.980156228045035
0.0749410788312299	0.967619109332509
0.0832963925678934	0.966195852401337
0.084575527733428	0.963970892680851
0.0877941922810022	0.963126810802662
0.0902376500363128	0.960089297439333
0.106495519895874	0.957722740418597
0.107596256478275	0.953131893932862
0.113903677715351	0.949865498519757
0.122402540770279	0.945646990614491
0.138846942521477	0.944142699794761
0.145406225586048	0.93768956737628
0.145554506279375	0.937152622790303
0.168356095900284	0.935252320257666
0.175310526170622	0.935093838347414
0.184260465643233	0.934990951215778
0.214344702789028	0.934031139527962
0.219685726485451	0.93262521744363
0.222917727944746	0.924842331648774
0.22380247983719	0.923914441607136
0.22751078012124	0.91967132658298
0.260642885894462	0.919443275067179
0.266643155346284	0.918678936107193
0.274184544222027	0.918423152042017
0.283766487150677	0.916317139357502
0.287161053371884	0.916037446113389
0.301286335967313	0.910086285515159
0.314252948885976	0.907017855888886
0.354534029427752	0.905926870830743
0.364915590379254	0.883179206772387
0.379738912732475	0.883097727018222
0.386406292424654	0.879663221329066
0.436147914832417	0.873458842578518
0.44306331193652	0.870647536071322
0.456006859699784	0.847100478690933
0.479274130170751	0.846998505146669
0.482947274460877	0.845202912549182
0.495858298454995	0.844602730814943
0.508786952089704	0.844566995997867
0.541417952286413	0.843683348646777
0.548299153645833	0.843611730390756
0.558461176610892	0.842292199867657
0.561531277761204	0.839220123177281
0.590475685322584	0.838753121208603
0.62675914756735	0.838738626205126
0.696903775665286	0.837809618585315
0.731413167903696	0.837612323053972
0.745606102308025	0.837538207367717
0.766679938570047	0.837512590494363
0.769428494780423	0.810643389929153
0.783533623262741	0.796087162984503
0.783863692148721	0.794389397089714
0.795915745523646	0.793572785487013
0.838241415038921	0.791598381838893
0.87671875	0.791570405957634
0.8931167685875	0.788146950741575
0.949841164940634	0.786982830610098
0.977577882572215	0.786100998777136
1.2477183833116	0.786099881198963
1.27261587907397	0.78566465953998
1.33284610481914	0.784215243702754
1.35478864674365	0.771164039030562
1.36495187374135	0.600233150120161
1.36883015787245	0.595624789567097
1.38199638848381	0.594836442346929
1.38642810101656	0.594166065921044
1.44692149397695	0.589948123361712
1.48915808215694	0.589902295371225
1.49208839032614	0.583461243579386
1.51949816205849	0.583333606535299
1.55562395100327	0.58267555843917
1.56026185730455	0.580192280796345
1.56610805774243	0.580084379862239
1.56741227266534	0.579774245362332
1.646696979098	0.579173066987324
1.70299997444774	0.543704495790269
1.75953801003503	0.543689104684346
1.77370437858406	0.543145352633929
1.7807993407499	0.543134743655208
1.82076267643638	0.541601164127708
1.87564766839378	0.541585978469663
1.90022822079395	0.540154572105997
2.18292829563521	0.54004551133848
2.21093382896311	0.537890405353588
2.30271864172441	0.509355853031843
2.36836959300188	0.497630480741419
2.46428571428571	0.497630276750619
2.48856507877062	0.49733459062772
2.49962901131515	0.497318880421901
2.55329227043129	0.495701755004839
2.56436681328535	0.495220762181378
2.56481481481481	0.495197314895899
2.589101758387	0.494747526836658
2.65846286026712	0.491203084676619
2.67057539263328	0.491120328522872
2.68317957790977	0.491062679265477
2.93587486895409	0.490837522961969
2.95165669509701	0.487603087079048
3.04474074962879	0.487505939374301
3.13114790123024	0.482267765966098
3.17153371383848	0.480912440885761
3.22310104908982	0.480497577508702
3.22400965180761	0.479564015065723
3.46209827962838	0.46822735453169
3.47647737084276	0.465027718022315
3.537054153122	0.464704542681926
3.55002963195897	0.46458407008618
3.56740595928273	0.464151784437652
3.57189552584808	0.463963224083816
3.67848898985088	0.463883688070568
3.68724814076609	0.463581768571626
3.80966304860377	0.459521515272577
3.82527192779449	0.459515219242217
3.82652845598874	0.455191836752084
3.83670715249663	0.455187517975414
3.84293074545256	0.438799937388812
4.02269752800875	0.438283356913067
4.07849118369169	0.438244187765151
4.11678665634752	0.428578482906368
4.21817759631572	0.422554459708231
4.28369871934013	0.422520895936107
4.36541204578683	0.421867122904332
4.5337157724132	0.421798797642667
4.65044300345434	0.421197716891828
4.72527879044624	0.418755670161085
4.93488534920357	0.418714048752327
5.04948876512816	0.417149764238069
5.13070127997116	0.417141681831124
5.13195609086751	0.416644719442112
5.13564690552964	0.415188758414333
5.40750798598688	0.414056629868737
5.41162324649299	0.414049359053764
5.64569744394965	0.413483299152198
5.68726086683811	0.413460068971213
5.98487607873198	0.403997689029015
6.01217614258106	0.210185841185602
6.18921075577555	0.203568437889357
6.36205395996519	0.203566763707713
6.37632662310685	0.202525129852603
6.39738120715286	0.198558495217446
6.50288009271869	0.19776142884762
6.52289383142717	0.196439268300268
6.59295566502463	0.196380110968023
6.6482308495703	0.194969650088372
6.71745793442389	0.188193372928123
6.74366828613394	0.184073526630762
6.86132291625685	0.175221933030292
7.34007394378556	0.164013614765686
7.53698986364596	0.162943413455995
7.67538904899135	0.162930773311728
7.9223475438784	0.157326316935687
7.98185349002067	0.157034443983687
8.04102731526826	0.156873775000635
8.27215699168491	0.156200179891328
8.31772905116053	0.155396517333248
8.41744275395728	0.155301705323171
8.43676529310362	0.154104838839851
8.48286509127332	0.145020188663573
8.63992915309295	0.143453839470995
8.69228206492243	0.142911518270338
8.7073240708514	0.142291928268477
9.24758199125798	0.123702661854687
9.28145085480767	0.122216194002642
9.59580717406469	0.121144660924436
9.63476348889239	0.113989084726177
9.6450342257036	0.113307710281972
9.71659629037859	0.101411484039225
9.94205947031265	0.101396244469325
10.0955852028358	0.100505917876585
10.244909916508	0.10049597041089
10.3994295033177	0.0997302661696157
10.460050500971	0.0972408760881515
10.5427309084138	0.0965209459255094
10.5829205917581	0.0964759353553035
11.079067914758	0.0964686193709391
11.1109350237718	0.0964557475514058
11.249306037474	0.0964473489587198
11.522669334701	0.0756800800497204
11.6066746126341	0.0756348480037878
11.703546661383	0.075598078661936
11.9479145827366	0.0685114280411274
12.4055973689149	0.0651417069161644
12.9586033843415	0.0641086814728493
13.0712841860068	0.0625898985637966
14.9200978393804	0.0625827501433043
14.9814814814815	0.0625818846394778
14.9848277143986	0.0623937512092465
15.171974522293	0.0623932936870218
15.3779208680668	0.0599783573337107
16.1924232828807	0.0550593027631145
16.2578125	0.0550585567396144
17.7732265847182	0.0546261370399884
18.2159022811481	0.0508768181762005
18.2224005789024	0.00580501867435246
19.5782092772384	0.00580366796383547
19.6775081741525	0.00574439843665064
19.6929049649675	0.00260938767005992
21.3893628332025	0.00255182875144788
24.4305784459541	0.00247933333498274
25.9254287844892	0.00230738657479834
34.0090792200285	0.00193682708552789
39.6846353818328	0.00168628704101026
42.565708193279	0.00150725742880509
43.0931165952179	0.000782275579688019
44.4769936830146	3.33218973176397e-05
50.5270453452272	0
