# Supplementary material
Source: MDPI journal article supplement (https://www.mdpi.com/1099-4300/15/12/5565)
Supplement: s2 [file s2 › Sources/Figure 6b/cepercap.csv]

		1980	1981	1982	1983	1984	1985	1986	1987	1988	1989	1990	1991	1992	1993	1994	1995	1996	1997	1998	1999	2000	2001	2002	2003	2004	2005	2006	2007	2008	2009	2010	2011
Bermuda		9.696692856	8.371334912	8.851187239	9.291479013	9.014145031	8.819864721	8.921960715	12.47263769	13.54993878	16.39972169	11.37781239	9.433390706	7.640715503	8.85938555	8.598158996	8.492784873	8.567274519	8.485760781	8.411907067	8.340585506	8.270535997	8.172142745	8.1243378	8.667850525	9.281144781	9.845546958	9.677603853	11.22086073	11.13295741	10.48806014	10.24490992	11.31158998
Canada		18.60054324	17.75446667	16.79528091	16.13132741	16.87115922	17.10267023	16.32649578	16.76956538	17.77489217	17.99047383	16.9333091	16.56568449	16.98995547	16.76689494	16.88751044	17.13460353	17.3177802	17.98046533	17.97941814	18.37695269	18.4334743	17.90750856	17.93750917	18.72113037	19.03129477	19.25964649	18.32026281	18.00735852	17.41045775	16.41473864	16.19242328	16.23705378
Greenland		0	0	0	0	0	0	0	0	0	0	0	0	9.014597225	9.290438533	9.329220315	9.282078662	9.395101171	9.565386657	9.68627451	9.670899471	9.862541747	10.09924733	10.16997908	10.1925617	10.30658579	10.42523364	10.67123525	10.42603859	11.14836692	11.24774306	11.24930604	10.59615051
Mexico		3.516354224	3.808988118	3.938288185	3.55474049	3.717891576	3.656448852	3.410037527	3.46567075	3.38525396	3.487889909	3.558409867	3.582021235	3.556318204	3.530143353	3.68294005	3.460081061	3.523970805	3.643566333	3.815125416	3.684810952	3.831778759	3.748783075	3.699065563	3.740520793	3.60164288	3.745714853	4.066595266	4.087089443	4.117975925	3.786682779	3.842930745	4.065034514
Saint Pierre and Miquelon		24.55759599	24.53577371	22.22644628	24.39209226	23.54664484	20.57467532	27.76811594	35.6544	37.10509554	42.08082409	41.28006329	39.15955766	36.49056604	19.93416928	20.371875	13.4125	13.39157566	9.408099688	10.89096573	10.87402799	11.90015601	10.97802198	11.04739336	12.12718601	13.2208	13.32903226	13.95284553	14.61311475	15.13884298	14.83166667	14.98148148	15.5229202
United States		21.01803343	20.25161659	19.04160707	18.77216786	19.58720237	19.35557006	19.21069396	19.69094286	20.41118642	20.5480451	20.19192661	19.75418116	19.85626489	19.96002425	19.99495458	19.9755311	20.43255247	20.4568573	20.3606559	20.3480491	20.779736	20.19361474	20.16196266	20.17536511	20.40341213	20.30087254	19.85487026	20.00550892	19.21965878	17.71767827	18.22240058	17.62122468
Antarctica		0	0	0	0	0	0	0	0	0	0	0	0	0	0	0	0	0	0	0	0	0	0	0	0	0	0	0	0	0	0	0	0
Antigua and Barbuda		5.942815463	5.319367126	7.150272019	4.388448644	5.008065767	4.794099379	5.011490683	6.076994722	6.138289617	6.275198012	6.588061097	6.478681868	6.426050936	6.652193578	6.867091421	6.926502692	6.79089352	6.927081875	6.799258038	6.685355309	6.780623756	6.679525609	6.596997691	6.90666498	7.391445317	7.958415354	7.952999757	7.563226657	7.796616186	7.781385029	7.675389049	8.324874829
Argentina		3.272369562	3.125869123	3.288460437	3.296510822	3.434247836	3.177292402	3.324003636	3.481717409	3.478548144	3.454193252	3.107619724	3.248874103	3.235704812	3.483380925	3.343909313	3.396046475	3.646272619	3.609646625	3.725749714	3.793807291	3.706306975	3.404754634	3.188864576	3.499601428	3.635600074	3.875934822	3.970311071	4.218272598	4.235856924	4.167173589	4.218177596	4.563238977
Aruba		0	0	0	0	0	0	1.804849498	1.823758026	7.078655462	9.177623991	9.425670316	9.553695324	9.871473805	9.499392467	9.63403982	10.91458229	6.908751655	10.60410625	10.45340136	10.32926283	10.64166667	10.52742662	10.39058262	10.85029876	10.77047978	10.81140441	11.47380711	10.47220556	10.55958243	10.0886776	9.94205947	11.65733673
Bahamas, The		19.02207285	19.98402436	16.67075024	12.27886444	10.9297035	9.754513585	10.43153437	11.40630331	10.28597871	11.63546676	12.19397871	10.35120934	8.757769364	9.015951254	10.25249512	11.98913945	13.30690271	12.99225859	14.65611073	12.97024811	12.38922113	11.9834786	11.8542172	14.36921229	14.45534925	16.562401	16.38778442	15.43749379	16.66038788	11.71536336	11.60667461	15.10966774
Barbados		3.842005001	4.071604058	4.029943191	4.23119482	4.059037132	4.456404276	5.015177915	4.716926521	4.463358338	4.781492972	4.963013803	4.97979798	5.101851852	5.101505457	4.771331058	4.991071095	3.910233994	5.348255943	5.439971986	5.550422018	6.232826659	5.999490742	5.972521903	6.056170059	4.15163905	5.458184545	5.292023754	4.863649242	5.262469136	5.306475983	4.934885349	5.028391057
Belize		1.561418086	1.383620401	1.258382257	1.242078419	1.314408308	1.276334863	1.535856108	1.18355543	0.831863286	1.173094459	1.640645466	1.786564496	1.513793447	1.459119802	1.346348381	1.516415711	1.216262277	1.918235423	1.866669502	1.843920822	2.660201613	3.390355011	3.09188672	3.167599642	3.298958561	3.435280316	3.361903108	3.491395404	3.448833272	1.522215005	1.489158082	1.670092177
Bolivia		0.820190028	0.838964009	0.722579056	0.782580354	0.728818759	0.637721696	0.636102858	0.605642611	0.664831072	0.747187513	0.770898553	0.731974246	0.904922789	0.956684821	1.129267437	1.038090163	0.967224995	1.034883011	0.962189365	1.089421797	1.129501775	0.960691728	1.096713019	1.341826986	1.3187196	1.274214312	1.384478	1.375339754	1.458434622	1.330368021	1.332846105	1.381232532
Brazil		1.533603136	1.41349017	1.361425175	1.261711371	1.362029359	1.419407178	1.534804047	1.550441885	1.536862063	1.544742076	1.588468817	1.616974258	1.536955262	1.643469222	1.687552466	1.785463598	1.865817843	1.950664891	1.914184671	1.953903606	1.975923354	1.971326539	1.934224764	1.904674096	1.93512539	1.993101226	2.04033199	2.109573869	2.224544107	2.097560157	2.302718642	2.4059721
Cayman Islands		5.725995316	5.891620112	5.696544276	5.371398638	5.285214785	5.213908873	5.132462687	4.94698686	10.85428571	10.76505784	10.40933232	10.70919666	10.5474198	9.543818727	9.968370607	10.39704524	10.10035629	9.755090336	9.607321131	9.300402685	8.931061394	8.745078243	8.493627451	8.555370326	8.947405005	9.176138926	10.15883128	11.31784108	10.1456331	11.27875204	11.07906791	11.53678474
Chile		2.168742857	2.071502391	1.723274506	1.719945711	1.755773627	1.716247704	1.583291135	1.651477385	1.904708386	2.317857408	2.449753034	2.303240082	2.33881258	2.433711111	2.633920675	2.833281708	3.160285553	3.687988228	3.663462006	3.967351924	3.599599857	3.523468291	3.408180957	3.622236073	3.998069959	4.196152486	4.333955968	3.747308242	4.058460449	4.448390701	4.72527879	4.735218758
Colombia		1.489152046	1.505500849	1.500956298	1.508711126	1.568644043	1.521228925	1.48402569	1.372893297	1.485110102	1.466910756	1.24972328	1.414134637	1.554016301	1.564869225	1.500086938	1.478567594	1.533433015	1.669191126	1.687517947	1.497191153	1.482757158	1.43765779	1.391996222	1.415376365	1.36450382	1.448439516	1.452349734	1.419359011	1.463546256	1.453386502	1.49208839	1.590896611
Costa Rica		0.986277358	0.959792813	0.874379736	0.90343376	0.768639975	0.788644297	0.73201316	0.827955875	0.945304998	0.978328005	0.90598921	0.935383541	1.15039642	1.220728813	1.203974696	1.369014788	1.263888575	1.234724107	1.346529375	1.351434278	1.289132484	1.3200639	1.340081324	1.458154375	1.380015434	1.343118643	1.5540275	1.667012997	1.624725715	1.555300165	1.555623951	1.487090741
Cuba		3.10175407	3.140679861	3.376121897	3.053815598	3.139984759	3.178743069	3.44794418	3.370225618	3.406970118	3.486938006	3.367436814	3.067887506	2.703160108	2.6636184	2.696897096	2.843367307	2.776326917	3.067627488	2.970950704	3.021102963	2.967944833	2.995089077	3.064327738	2.976905539	2.960532122	2.552883259	2.255649683	2.36299903	2.613930627	2.634703665	2.55329227	2.562423054
Dominica		0.362565976	0.475788901	0.474461455	0.470857451	0.47317205	0.545889755	0.555678364	0.603870788	0.777684329	0.831371437	0.835880588	0.833571021	0.840779738	0.883839818	1.012831359	1.134276113	1.143521127	1.154809334	1.203597944	1.198294243	1.123693872	1.429995787	1.557248707	1.684790185	1.502015849	1.281198003	1.627404844	1.675186516	1.752723762	1.78447564	1.780799341	1.940112375
Dominican Republic		0.954083478	0.895919036	0.935065022	1.10469683	0.947224648	1.039146828	1.053653469	1.213663594	1.258248183	1.174172089	1.279183525	1.276388274	1.404272484	1.225988354	1.296523013	1.420295477	1.470510116	1.522002652	1.549334471	1.724953154	1.865369924	1.925655508	1.957254279	2.196893638	2.005592097	1.902882545	1.98294144	2.032617494	2.029346591	1.878265859	1.900228221	2.072954257
Ecuador		1.614078657	1.650808001	1.742567701	1.502674699	1.450988746	1.492960451	1.588989666	1.424402524	1.495401322	1.38614899	1.462248644	1.522105635	1.74276683	1.545283103	1.634442522	1.712043999	1.712028304	1.709185607	1.780213981	1.594724131	1.613453973	1.704012631	1.693687204	1.715589047	1.76003411	1.804561012	1.907814582	1.875636012	1.889049195	2.08691356	2.210933829	1.941178117
El Salvador		0.435868992	0.382435195	0.368571314	0.404026324	0.402359728	0.414609135	0.45957817	0.445230447	0.469112106	0.443066164	0.46786971	0.52972534	0.609230781	0.606259666	0.671774911	0.848743483	0.789103738	0.831048057	0.959655576	0.947042086	0.941772567	0.969135068	0.977027464	1.026919601	1.014872488	1.042706616	1.044189392	1.057270866	0.987576688	0.983726329	0.977577883	1.105580416
Falkland Islands (Islas Malvinas)		5.84	5.755	5.755	5.755	5.77	7.21	7.99	7.99	15.855	14.165	12.595	12.595	12.72	12.72	12.725	14.305	15.89	14.38683128	11	10.21428571	10.03508772	9.862068966	10.84641638	10.6969697	11.8013468	12.83838384	13.9023569	16.05387205	14.57961783	15.17197452	15.17197452	14.56687898
French Guiana		4.998714286	4.318	5.491285714	4.882375	3.898625	3.487555556	4.273222222	4.336	4.674181818	5.242636364	5.707666667	6.45425	4.865461538	6.683153846	6.206071429	6.455866667	6.454533333	6.05075	5.788705882	5.643955036	5.574568025	5.43501254	5.425685733	5.523219654	5.252412957	5.226793457	5.35845703	5.027775176	4.822266874	3.667794648	4.283698719	4.503746032
Grenada		0.507320319	0.568922577	0.630667677	0.608667459	0.629286176	0.639802278	0.741314805	0.755794174	0.821402057	0.854612937	1.307749469	1.308207527	1.346645536	1.463345865	1.694366925	1.579087375	1.698124683	2.112684544	1.898894312	1.887612635	1.161893514	1.965783557	2.270517308	2.304974835	2.328075406	2.369251362	2.475475285	2.468410615	2.692192192	2.525466418	2.499629011	2.480723114
Guadeloupe		1.440029674	2.029469027	2.560879765	2.661884058	2.8944	2.616666667	2.618324022	3.013553719	3.275013624	3.511736842	3.697846154	3.775475	3.445452742	3.982614469	4.062506097	4.133126935	4.066999304	4.083148954	4.04855835	4.015304332	4.193255663	4.221797675	4.260238324	4.385247572	4.479959582	4.628103775	4.840518574	5.424030125	5.104344807	4.573607555	4.533715772	5.205538527
Guatemala		0.625017482	0.528898704	0.50574418	0.509603333	0.435730603	0.477706956	0.412783887	0.396994809	0.412710015	0.410201842	0.422073381	0.387979269	0.464943184	0.503375029	0.556585415	0.605788696	0.615004943	0.662648674	0.792285121	0.797104028	0.817294135	0.886845055	0.892332882	0.886277517	0.890620511	0.910208454	0.895650254	0.924933081	0.844904828	0.892773106	0.838241415	0.846856948
Guyana		1.871969448	2.151733099	1.733738825	1.536278472	1.754300786	1.773919318	1.829757133	1.388752353	1.374365664	0.907077804	0.872927819	1.030018299	1.148716278	1.505554831	1.503614929	1.260986011	1.346226378	1.466235473	1.857908361	1.962694699	2.14542492	2.201523669	2.245256985	2.191662072	1.971057628	2.17757888	2.074317394	2.085557927	2.005566842	2.18102372	2.182928296	2.245820857
Haiti		0.154273109	0.100711914	0.139974079	0.121996694	0.121554923	0.136487078	0.13029393	0.201544055	0.218536291	0.187694	0.109334593	0.114129784	0.124866159	0.085913694	0.073000355	0.123891736	0.143857056	0.182659728	0.165271961	0.179562676	0.180450475	0.192695873	0.195948959	0.191656151	0.193213564	0.191097562	0.192757514	0.209272364	0.208072762	0.230053886	0.219685726	0.216368842
Honduras		0.4989875	0.426368732	0.41827337	0.431259121	0.423202195	0.385170615	0.409541699	0.391097259	0.433888965	0.509626247	0.56887629	0.540315371	0.538861154	0.520202117	0.557123535	0.625143448	0.681475413	0.651086037	0.721306155	0.78580428	0.72061987	0.814064085	0.89072395	0.874498146	0.997342605	1.011116255	1.020733743	1.105119468	1.036928809	0.92666556	0.949841165	0.979285472
Jamaica		3.494880653	2.964943743	2.461208453	2.606679703	2.164881153	1.939163482	2.093836516	2.244648239	2.620963068	3.020482227	3.211554275	3.318218448	3.582244465	3.586658911	3.639371378	4.034612222	4.029577211	4.161426686	4.255418035	4.33321874	4.14003892	4.128876619	4.185104579	4.306260342	4.282045706	4.107253399	4.559118861	4.756079677	4.500197908	3.269454657	3.223101049	3.331758693
Martinique		1.946533742	1.930715159	1.912103966	1.86692347	1.642801881	1.979227352	2.209909228	2.465364478	2.935572875	4.096276087	4.363795645	3.591534508	4.030687308	5.484620419	5.361688294	5.431639574	5.414171123	5.37066355	5.343458067	5.308575623	5.341766234	5.311297114	5.343139774	5.547136541	5.700310085	5.970220941	5.984713248	6.1717	6.103261275	6.617441026	6.592955665	6.972845481
Montserrat		1.43415463	1.642917727	1.661234991	1.675605536	1.695804196	1.85335689	1.966101695	2.270513977	2.583409298	2.612903226	3.521901212	3.2667295	3.94	3.975024015	4.003868472	4.64459591	5.597484277	8.011764706	15.03846154	15.03846154	13.67594937	12.74056604	11.23284823	13.44320713	13.44959677	15.42825607	16.46868251	18.40798226	18.24212598	16.32156863	16.2578125	17.09338521
Netherlands Antilles		68.7783514	63.08273274	59.63223471	54.52004815	51.03206889	42.601481	54.76818749	55.95551247	50.78825861	52.38181527	51.61459823	48.42957821	49.73859375	47.5566581	49.02815184	57.35578905	56.70050686	59.21003243	58.36261601	56.28511682	55.27338472	55.15615432	50.33381543	49.80200629	49.89813966	49.13866424	54.02938393	48.4017438	47.00008874	53.75582471	50.52704535	46.91635575
Nicaragua		0.657363639	0.658599693	0.642207199	0.597783772	0.557943511	0.620227411	0.645785677	0.628392899	0.62167554	0.602681512	0.552124845	0.501510857	0.585299924	0.553967635	0.587931533	0.630744975	0.649849648	0.656505466	0.739475009	0.782921188	0.760980401	0.796600723	0.804712401	0.803861896	0.851705726	0.872659788	0.891261059	0.87109128	0.822279244	0.810848611	0.795915746	0.888502197
Panama		2.753114204	2.621361749	2.320799215	2.410776676	2.306739943	1.664918205	5.095060936	5.19600397	4.911091029	4.748453476	4.929586704	4.847686162	4.915154486	4.740883878	5.231544493	5.476800206	4.616854847	4.656271868	4.997390275	4.586819955	4.461953916	4.557631533	4.222246639	4.130196718	4.559262027	4.696871345	4.639620394	4.65419402	4.526797153	4.723145869	5.131956091	4.594750409
Paraguay		0.437003405	0.392015602	0.374398284	0.384513625	0.408086559	0.401493342	0.406960079	0.500671448	0.435182569	0.566042406	0.522981843	0.468077477	0.523089865	0.540211202	0.617530729	0.692048177	0.544824858	0.58211314	0.648785234	0.717643094	0.657167272	0.625252562	0.639385167	0.651824633	0.643836134	0.622749994	0.612045239	0.610613447	0.617007351	0.650815148	0.696903776	0.617252356
Peru		1.262192041	1.282734247	1.439346169	1.293834694	1.202374922	1.177827958	1.286608665	1.216347416	1.198444514	1.014271599	0.931848829	0.857428824	0.895413062	0.969128216	0.991608478	1.036337388	1.058820938	1.027136965	1.037979842	1.046819316	1.043476053	0.998183785	0.988460339	0.987496153	1.090251006	1.140325606	1.217731714	1.202759527	1.280046691	1.29315815	1.446921494	1.289276808
Puerto Rico		8.997348621	9.580277063	6.920494053	6.659173771	7.2760176	6.229924515	6.729021768	6.994097786	6.218731565	5.834892743	5.718355853	6.743458231	6.510931111	6.771174111	6.920717738	6.591021151	6.500923574	6.641932421	7.275639364	6.931488284	7.273268584	9.045114003	9.212200225	9.787148794	9.982066331	9.889735592	9.951230024	9.033135078	9.139050273	7.751238501	8.692282065	7.695555873
Saint Kitts and Nevis		1.159972458	1.227920883	1.420009221	1.16747629	1.172893943	1.17423713	1.252281769	1.333568738	1.566721972	1.577290076	1.587133941	1.824438541	1.837265286	2.041607228	2.388406477	2.139809877	2.405920147	2.37871568	2.349473212	2.32240195	2.295663601	2.269322364	2.245234526	2.492787442	2.739532927	2.851148225	3.750207125	5.297780518	5.567468406	5.45755861	5.411623246	6.016497714
Saint Lucia		0.912883736	0.707903226	0.842888995	0.762353681	0.752942999	0.924127929	0.932258308	0.994112386	1.23800738	1.228791209	1.217868566	1.202773586	1.244910987	1.206527068	1.334900442	1.3378157	1.322129986	1.371985839	1.359555026	1.349812636	2.168819309	2.256411917	2.285061172	2.487596949	2.358866335	2.387748618	2.388035161	2.577138541	2.699542578	2.575216822	2.564814815	2.629982669
Saint Vincent/Grenadines		0.38648869	0.352620968	0.377786624	0.372360279	0.340266304	0.383245065	0.379438717	0.405592417	0.483794988	0.711850117	0.727442034	0.70072249	0.765754944	0.704256495	1.121170301	1.153966357	1.153626919	1.229536875	1.510055351	1.513965964	1.546634526	1.579778831	1.659332463	1.739053144	1.852084899	1.872725559	1.819566657	1.862406229	2.155040976	1.8693698	1.875647668	1.914797343
Suriname		5.907902169	5.002464214	4.339320926	3.073060083	2.525580073	3.155702588	3.29777078	2.883266074	2.731411341	2.887462766	3.621659296	3.567541675	3.42309984	3.553396675	3.516037535	3.532122317	3.452467796	3.461381004	3.431531189	3.368960372	3.468149297	3.595655399	3.723651591	3.755167681	3.854204477	3.914045747	3.965071303	3.831704836	3.685176098	3.810454723	3.67848899	4.220641406
Trinidad and Tobago		9.681809429	9.12104636	8.76056488	13.11488046	13.73459209	15.01676997	13.8889459	13.85882334	13.89637268	13.96831336	14.48804563	14.76713557	13.77475267	15.23892595	17.18612922	17.89567515	19.17306687	20.39830179	20.30344137	20.93008297	21.97720047	24.0261799	24.79302318	23.96856966	26.27307497	31.73712895	38.23317619	37.83483262	40.24596368	38.8860035	42.56570819	42.4180414
Turks and Caicos Islands		0	0	0	0	0	0	0	0	0	0	0	0	0	0	0	0	0	0	0	0	0	0.821463897	0.599719757	0.560209424	0.514629259	0.465386009	0.404839765	2.15600118	2.066985646	4.033430942	3.825271928	3.470102633
Uruguay		1.965722456	1.762086475	1.657708828	1.302650201	1.228127794	1.142881277	1.137959806	1.307328784	1.542665398	1.590437552	1.458264184	1.368734086	1.453813841	1.584100287	1.484917263	1.480378027	1.563704514	1.642961785	2.00346692	2.265543416	2.024709686	1.531262476	1.656606789	1.710470214	1.853296179	1.925765182	2.253085155	2.144921437	2.434716724	2.750911569	2.564366813	2.516545062
Venezuela		6.383123791	6.694563459	6.504598045	5.974387637	5.811130211	5.671441876	5.978621973	5.902155646	5.662184081	5.730169458	5.677933809	5.632892857	5.51819959	5.487356855	5.652093341	5.77325862	6.069320461	6.03525879	6.254128544	5.56124009	5.722983048	6.23622256	6.063987464	5.44478463	5.757216934	5.772961766	5.871433998	5.866617634	6.125136571	5.875843003	6.397381207	6.609589249
Virgin Islands, U.S.		170.0065235	151.5978968	109.9253523	77.13791729	89.50238569	100.4481937	65.98938913	78.68453915	52.09153046	76.88093824	71.68333975	75.989314	78.91713178	78.77284669	77.91604547	79.30921907	78.87602923	76.4988003	80.56965174	81.76325967	90.53902798	125.8068087	120.6628777	134.8802849	163.6264937	144.8266271	153.9874652	137.2850493	120.77701	142.5436229	146.4559142	175.7780299
Virgin Islands, British		2.015454545	3.063047285	2.934010152	2.853181077	2.521602514	2.484825493	2.771093177	3.125531915	3.230506156	3.328269485	3.211599745	3.097111248	3.184226015	3.058790277	2.945048966	2.836306401	3.059777102	2.954500978	2.856601988	2.767537827	2.682363394	2.602586207	2.53101425	2.854226215	3.538186158	3.684190182	3.810344828	4.04806992	4.19694819	3.934948097	3.836707152	4.843369529
Albania		3.316069042	3.255907087	3.17533542	3.203498372	3.187320442	3.148195623	3.088497864	2.865334339	2.919524107	2.567582452	1.87205271	1.379990884	1.230471255	0.920164107	0.726092519	0.741928027	0.613940567	0.59617537	0.714673008	0.924014771	1.032836766	1.141445013	1.212476961	1.373945734	1.428543754	1.528379616	1.514006348	1.466586219	1.465185716	0.944077867	1.272615879	1.396721509
Austria		7.396731939	7.203524825	6.742385417	6.760777979	7.196174808	7.284602197	7.113752999	7.252200187	6.933129731	6.930958355	7.213310976	7.699979024	7.194091702	7.306878552	7.198250024	7.365010941	8.052736374	7.972518798	8.321946075	7.99959724	7.868299519	8.328107687	8.671826428	9.079545148	9.24087435	9.468422139	8.932543867	8.850943562	8.675378678	7.987771428	8.436765293	8.175719946
Belgium		13.78053987	14.011992	13.10456155	11.59705018	12.05144947	12.09572031	12.23745665	12.1433284	11.83959834	12.42916369	12.5657543	12.98849217	12.38509619	12.46544867	13.3651292	13.67100358	14.01416554	14.2665898	14.75188386	13.97394208	14.42989218	14.11742203	13.79129691	14.60828182	14.81925016	14.55275612	13.71307545	13.63692297	14.87356917	12.74661284	13.07128419	12.56419511
Bosnia and Herzegovina		0	0	0	0	0	0	0	0	0	0	0	0	4.594486006	3.977600247	1.379142056	2.496290866	1.268641703	2.643319251	3.255687795	3.140626219	3.974941598	3.867317573	4.158096921	4.197492408	4.421845861	4.721034651	4.900118375	4.789231342	5.409472994	5.516444813	5.645697444	5.71693506
Bulgaria		10.01365631	9.745830627	10.05153901	10.04005822	10.1202327	10.34503224	10.81776739	10.71813182	10.27825336	9.504827554	8.566243874	6.474788455	6.651538198	6.165498876	6.108218988	6.308059415	6.566448108	6.704791435	6.254850554	5.664915377	6.270475155	6.767465452	6.260149051	6.807624796	6.799730512	7.013424873	7.163431216	7.087291031	6.969056877	5.902148462	6.376326623	7.393166273
Croatia		0	0	0	0	0	0	0	0	0	0	0	0	3.689878305	3.776744456	3.941303736	4.080025708	3.906107262	4.208581669	4.494051161	4.559003534	4.55756853	4.559697777	4.70704661	4.97770678	4.818613836	4.666287062	5.07474498	4.876968204	4.969286703	4.46370904	4.365412046	4.984838753
Cyprus		4.489091976	3.822615782	4.032650468	4.381416603	4.45900265	4.721062395	5.164665498	5.719050198	5.629889345	6.71448422	6.829288916	6.695822403	7.656144178	7.593299249	8.321908805	7.993816015	7.788360523	7.685253168	8.12983787	8.710479887	8.189304976	8.786024468	8.558802716	8.40619914	8.709154266	8.739458219	9.077058863	8.888913253	9.190416378	8.50466006	8.041027315	8.480896751
Czech Republic		0	0	0	0	0	0	0	0	0	0	0	0	0	11.30997547	10.67112997	10.7528146	11.3017285	9.64831065	9.207350147	8.327875071	9.210721773	9.313047452	9.022882521	9.110670182	8.812181711	9.170140238	9.460479549	10.1229868	9.695871503	9.018712482	9.281450855	9.067193905
Denmark		12.68136044	11.77563325	10.8322935	10.06619283	10.65881267	12.39188336	12.66345085	12.53685182	11.53557643	11.52023248	11.10830489	12.44624249	11.8506243	11.40608166	12.43219225	13.22711037	13.77324746	14.13452607	11.32484532	10.82376746	10.21048184	10.46427164	9.886947898	11.43735795	10.40229136	9.547951711	10.88178679	10.40128783	9.884765312	8.964130599	8.317729051	8.438641637
Faroe Islands		0	0	0	0	0	0	0	0	0	0	0	0	12.83068229	13.30180082	13.95573034	14.95728066	15.35375086	15.22338252	14.83662478	14.65248227	14.71587683	14.4636188	14.23189018	14.18540146	14.25947401	14.34278617	16.28083609	14.66157971	14.37641257	14.83155956	14.92009784	15.93789324
Finland		11.57858706	10.85265502	9.709548305	9.106872414	8.766227142	9.548088654	10.23870793	10.32538683	9.950855431	10.41799397	10.67492575	10.22243453	9.817043705	10.34638736	11.40487295	9.765082817	10.36089026	10.49084121	9.746124912	9.299152789	9.697448052	10.25029776	10.31395676	12.80738259	11.78702505	9.940569816	11.07154149	11.10148784	10.45877878	9.829854789	10.3994295	10.27826401
Former Czechoslovakia		13.67585816	13.53663236	13.4476545	13.54540214	13.86761782	13.65242038	13.39787493	13.64744967	13.199041	12.9829745	12.61099734	11.07516054	10.26439455	0	0	0	0	0	0	0	0	0	0	0	0	0	0	0	0	0	0	0
Former Serbia and Montenegro		0	0	0	0	0	0	0	0	0	0	0	0	4.443107	0	0	0	0	0	0	0	0	0	0	0	0	0	0	0	0	0	0	0
Former Yugoslavia		4.866214985	5.261496681	5.365167589	5.577132407	6.445380456	6.704241469	6.574865174	6.630350715	6.697351908	6.692491108	6.547186557	5.829871251	0	0	0	0	0	0	0	0	0	0	0	0	0	0	0	0	0	0	0	0
France		8.863111746	8.001654323	7.592152803	7.296398896	7.010210445	7.014717216	6.387793105	6.22794108	5.935842981	6.306797239	6.311545336	6.702387278	6.480804816	6.218612	6.066489409	6.227357219	6.497404524	6.363372502	6.751615831	6.61796973	6.55699893	6.584357382	6.483278414	6.553859054	6.555908787	6.564601281	6.561429834	6.62548741	6.673061846	5.979417444	5.984876079	5.732768072
Germany		0	0	0	0	0	0	0	0	0	0	0	11.61416587	11.10517029	11.00592403	10.75167944	10.90972656	10.87176744	10.82408375	10.60550814	10.22098092	10.39935695	10.66540951	10.37286829	10.56824345	10.51636854	10.27856188	10.32978653	10.05287288	10.03238321	9.438466135	9.71659629	9.187047965
Germany, East		17.73254705	17.75396545	17.93910292	17.67490096	18.62607383	19.59173336	19.22934729	19.40014433	19.44757136	18.98892281	18.00073235	0	0	0	0	0	0	0	0	0	0	0	0	0	0	0	0	0	0	0	0	0
Germany, West		12.33337833	11.68441437	11.30578484	11.34971404	11.62387232	11.27353819	11.75390017	11.50843956	11.32934423	10.8594513	11.05852208	0	0	0	0	0	0	0	0	0	0	0	0	0	0	0	0	0	0	0	0	0
Gibraltar		16.95490808	18.7273659	16.91265165	13.6	12.65285158	28.67399651	49.38321293	49.26244497	62.63303363	52.92143327	57.41772587	61.34733096	110.1648273	118.0547392	120.5892457	120.864774	121.3058252	121.0201869	139.011215	121.2675635	267.5449212	141.5695931	142.8666667	146.243291	150.8194298	153.8176388	157.0847933	161.5519049	158.5363985	168.8836806	171.2624654	169.3691298
Greece		5.389782328	5.403209875	5.225457979	5.534805544	5.649200934	6.109041897	6.400238359	6.989842087	7.492630265	7.787361289	8.045528945	7.94246055	7.707740985	8.022300898	8.123646311	8.208640647	8.275807249	8.681067226	9.219190557	9.077263862	9.592440083	9.745345659	9.65631289	9.992936161	9.876440827	9.873052534	9.89178298	10.22456052	9.88931643	9.297074812	8.639929153	8.484864509
Hungary		7.818773387	7.73580754	7.691085176	7.569153166	7.650056711	7.744406599	7.269375273	7.24730277	6.932428058	6.860398578	6.43567897	6.358894806	6.038806516	5.70739872	5.720411206	5.600713368	5.786231029	5.738126311	5.694782558	5.726975376	5.454825508	5.663978922	5.681346771	5.905626145	5.76314282	5.915780274	5.824270102	5.643434524	5.593773951	5.091057712	5.135646906	4.968177818
Iceland		7.224228612	6.741637782	6.649529915	6.827919339	7.058705637	7.642833471	8.072139918	8.318865457	8.498019128	8.952720079	9.26660647	8.636802554	8.951777924	9.391319325	9.573549308	9.280005981	10.36858736	10.41863638	11.00288321	10.74127236	11.29575861	10.66588252	11.0024303	10.9528276	11.28445079	11.17894453	11.37382678	12.84327493	12.14183395	10.96576347	10.58292059	12.24439015
Ireland		6.30358424	5.991917872	5.796304598	5.616084475	5.413921791	5.654242938	6.690939133	6.900946354	6.662618994	6.918971308	7.335465481	7.595380045	7.752630869	7.866907932	8.163163252	8.392485659	8.727117469	9.345055864	9.816575063	10.21244232	10.64366857	11.18202804	10.77312725	10.34745151	10.64486356	10.60658603	10.69204831	10.21056656	10.06830673	8.584052402	8.272156992	7.828836775
Italy		6.586015722	6.472981987	6.285001496	6.116449169	6.185995095	6.448365002	6.549786785	6.909421522	7.00108462	7.273651314	7.324704157	7.342761164	7.294114598	7.220608882	7.058565962	7.530120949	7.377124885	7.374640521	7.657983686	7.641635416	7.748166502	7.678214015	7.77982926	8.094888201	7.986327066	7.992935205	7.887014264	7.706759654	7.484419794	6.741967917	6.861322916	6.570963407
Luxembourg		31.94799671	27.52785988	25.74048452	24.16280849	26.63278456	26.64193698	26.330226	24.73925093	25.73097812	27.50341613	27.99237538	29.34547333	28.65023564	29.91142484	27.18820586	21.71391262	21.71684674	20.51250564	18.77948417	19.66552609	20.56192169	21.53876074	23.09033031	24.04523163	26.57911345	26.93725591	26.24805548	25.28945067	24.61083105	23.25582578	24.43057845	23.58174051
Macedonia		0	0	0	0	0	0	0	0	0	0	0	0	4.938487107	5.111641878	4.640822106	4.763675443	5.021556491	4.948792358	5.43683443	4.958353907	4.178197179	4.105612404	3.998921416	4.034940913	3.998553985	3.913507329	3.869747141	3.931276509	4.206537558	3.876683828	3.687248141	3.344090732
Malta		3.458571429	3.784655575	4.154294598	3.10709166	4.508537765	3.96101314	4.669474656	5.180403954	5.882341242	6.361983564	6.604772911	6.591372938	6.479803225	7.486743602	7.361874682	6.671999788	6.874644699	7.279984332	7.518399419	8.524419804	7.473111937	6.304897032	7.459265095	7.401007136	7.515207257	7.739141344	7.351865271	7.725266249	7.872921468	16.4926574	19.67750817	16.72666716
Montenegro		0	0	0	0	0	0	0	0	0	0	0	0	0	0	0	0	0	0	0	0	0	0	0	0	0	0	2.56074118	2.360706253	3.181441505	2.305394388	3.04474075	3.27314486
Netherlands		14.20650654	13.55573682	12.68327747	12.10797885	12.74186356	13.18175764	13.39224402	13.67161417	13.79676913	13.66891637	14.10645689	14.49523744	13.98596491	14.52844076	14.42490485	14.38416567	14.67153695	15.26562174	15.13793648	14.88782363	15.45916995	16.29499009	15.74381916	15.88542735	16.26355468	16.47189661	16.53908841	15.7851816	15.20392186	14.78188474	15.37792087	15.19154748
Norway		8.216510591	7.599760958	6.973998673	7.131003796	7.413747044	8.168927999	8.752611242	8.23841955	8.083673697	8.520706839	8.199893447	7.593155831	8.322133465	7.919904174	8.322401675	8.686288454	9.093792225	9.477026196	9.472924074	9.875338869	9.183961802	9.195555014	9.350282984	9.979632963	10.51896139	9.157081149	8.901618367	9.109794228	8.618564914	9.594808756	9.645034226	9.776329167
Poland		12.05649162	10.76844635	10.77001621	10.69424868	11.07709435	11.33738465	11.40608672	11.6814008	11.35166916	10.87122625	8.756399168	8.611249458	8.54239563	8.803311345	8.349377275	7.983255977	8.916112518	8.706710859	8.11642499	8.442489617	7.568753014	7.152996974	7.134381056	7.377398819	7.573415181	7.458612977	7.762599557	7.68334197	7.654398232	7.44409182	7.922347544	8.009838303
Portugal		2.409857023	2.141155199	2.78242534	2.84032094	2.737602664	2.951131584	3.169144105	3.286156028	3.429487703	4.334013897	4.42570815	4.470928046	4.794186557	4.598855518	4.63840725	5.049444938	4.794206291	5.163970178	5.495448824	6.169323705	6.147731143	5.883357162	6.324287153	5.902845049	6.023004233	6.252711237	5.796243967	5.601316002	5.220169506	5.454527116	5.049488765	5.034609598
Romania		7.722481749	7.800654189	8.025866037	8.312370801	8.055620009	8.113949079	8.311306178	8.488356224	8.36881404	8.613701923	7.701394431	5.943332825	5.695139235	5.40969245	5.143866499	5.449530819	5.593586377	5.3339151	4.466535592	4.056526233	4.155389389	4.550537798	4.470719739	4.469882554	4.50837415	4.376118837	4.482894276	4.466166203	4.257394901	3.564707507	3.476477371	3.934797108
Serbia		0	0	0	0	0	0	0	0	0	0	0	0	0	0	0	0	0	0	0	0	0	0	0	0	0	0	6.224135397	5.962558638	7.555935623	7.42949776	7.536989864	8.001857587
Slovakia		0	0	0	0	0	0	0	0	0	0	0	0	0	8.052137847	7.519196447	7.940148352	8.162696648	7.705491909	7.181196014	6.903983513	6.740172805	7.331066779	7.228554265	7.267442827	7.049235098	7.291842191	7.295107042	6.925505278	6.858956522	6.305960956	6.502880093	6.368872603
Slovenia		0	0	0	0	0	0	0	0	0	0	0	0	6.212368886	6.784982474	6.533512573	7.633383762	8.463393493	8.267392785	8.070479061	8.148986142	7.797941867	7.991025169	8.21606264	8.349875721	8.357330708	8.494488009	8.495744522	8.423934304	8.676571816	8.034058105	7.98185349	7.914623842
Spain		5.201510816	5.436456181	5.816718448	5.908013975	5.490212669	5.320993594	5.147246688	5.177920922	5.176569396	5.650784199	5.69584585	6.005964306	6.113708311	5.818194043	5.965577361	6.120445993	5.961278546	6.649012811	6.867629807	7.42004932	7.776594644	7.802867647	8.11144773	8.184423205	8.531371046	8.680545904	8.378549573	8.580789593	7.843617248	7.080659264	6.717457934	6.815212049
Sweden		9.902767232	8.754903858	7.597076848	7.129470058	6.864648036	7.401954684	7.834684109	7.604768803	7.26281741	6.816319661	6.636312584	6.515416856	6.765258571	6.907593326	7.332519201	7.228010259	7.574762461	7.388810716	7.433673905	7.267969279	6.797105867	6.738214367	6.377410748	6.773147193	6.717964925	6.399806927	6.291945966	6.25802644	6.037253231	5.49989238	6.522893831	5.847445133
Switzerland		7.394964629	6.201016168	5.716321221	6.123560673	6.073373738	6.253376315	6.690562388	6.410411999	6.345846418	6.210907888	6.353667928	6.516337717	6.539345857	6.162631193	6.015079364	6.158694399	6.256150557	6.106234796	6.34719172	6.372849154	6.244042736	6.278723835	6.032095691	6.10395502	6.129605762	6.142331993	6.089783584	5.827491225	5.957692813	5.72877192	5.407507986	5.524006064
Turkey		1.522690368	1.364658209	1.543628479	1.613013768	1.645355092	1.82574547	2.027693721	2.060452641	1.903403573	2.162891201	2.289149105	2.381463526	2.350651281	2.417642118	2.299254162	2.473187747	2.683534652	2.84381512	2.825127138	2.741078878	2.999082717	2.69249659	2.799884253	2.920355091	2.939003993	3.177176757	3.403915464	3.747475118	3.600561075	3.50317373	3.46209828	3.761288967
United Kingdom		10.89548585	10.62960913	10.15323489	10.24839536	9.996531596	10.41390246	10.48869499	10.6580495	10.49823288	10.69170361	10.48279032	10.59477771	9.994356548	10.07046484	9.865324247	9.626467171	10.09270323	9.689902583	9.574024329	9.453342473	9.474791414	9.645485377	9.423838352	9.57106942	9.70310651	9.639430724	9.622507408	9.30451372	9.147444787	8.326083664	8.482865091	7.923639789
Armenia		0	0	0	0	0	0	0	0	0	0	0	0	3.29607232	2.064089591	1.944934407	2.392687576	2.695335248	2.484269369	2.63110703	2.621918087	2.830356673	2.899180536	2.785949393	3.006123176	3.070235612	3.473418485	3.478824877	3.849221813	3.764834484	3.406926188	3.567405959	3.955629755
Azerbaijan		0	0	0	0	0	0	0	0	0	0	0	0	7.792618333	6.434616386	5.799877769	5.622682313	4.782153095	4.676490939	5.755349532	5.826036991	5.170873961	3.659555267	3.976376103	3.913495581	4.111755692	4.214257873	4.472623574	3.750391568	4.225432961	3.340133032	3.171533714	3.886168125
Belarus		0	0	0	0	0	0	0	0	0	0	0	0	8.954592298	7.929236088	6.455846041	6.10918263	5.957944715	5.809519249	5.623590802	5.779627451	5.985218356	5.450099405	5.119250056	5.620380822	5.562563606	6.560012033	6.803228486	6.796810547	6.892574688	6.305778578	6.64823085	6.95106769
Estonia		0	0	0	0	0	0	0	0	0	0	0	0	16.90479617	11.23297775	11.31379724	10.21418449	13.74620928	12.93765168	13.25691485	11.54373417	11.79638944	12.15479788	12.13820839	13.79305111	14.36290864	14.21567421	14.10650669	15.19596325	14.42503059	12.42016516	14.98482771	15.79385951
Former U.S.S.R.		11.58629043	11.59533233	11.9160193	12.03767527	12.41263152	12.70733534	13.06236206	13.12665768	13.33000306	13.0183732	13.21562621	12.11571056	0	0	0	0	0	0	0	0	0	0	0	0	0	0	0	0	0	0	0	0
Georgia		0	0	0	0	0	0	0	0	0	0	0	0	2.892429728	1.474235939	0.974150574	1.080463599	1.151618074	1.214445436	1.228381974	1.001798296	0.96938171	0.852385929	0.960489472	0.790363666	0.884309176	1.039772096	1.051013951	1.225281963	1.243731159	1.409678908	1.386428101	1.279497674
Kazakhstan		0	0	0	0	0	0	0	0	0	0	0	0	15.38312359	13.35659395	10.02383834	8.488208563	8.707770432	7.424456685	7.288822085	8.421137428	8.459815455	8.894991021	9.098360791	8.6909865	10.30009532	10.50627781	11.05979469	11.05620653	11.10649239	10.06864797	10.4600505	11.28922576
Kyrgyzstan		0	0	0	0	0	0	0	0	0	0	0	0	3.054361224	2.27374632	1.841887618	1.199730737	1.509381129	1.522627282	1.606614113	1.525611752	1.460243097	1.30977349	1.15246432	1.030695643	1.147391044	1.068526892	1.042927273	0.97509685	0.972368642	1.471277561	1.381996388	1.429688962
Latvia		0	0	0	0	0	0	0	0	0	0	0	0	4.874783533	3.589275483	3.473119004	3.743176273	4.032565399	3.492481435	3.423961014	3.121959677	3.104318696	3.252146737	3.17980865	3.388408655	3.550034471	3.759972754	4.096652804	3.804616317	3.586758825	3.556527	3.537054153	3.843870622
Lithuania		0	0	0	0	0	0	0	0	0	0	0	0	6.283327208	4.775039306	5.022330989	4.800625003	4.326852619	4.460477517	4.759869113	3.749246265	3.631842797	3.571106082	3.660373827	3.754390084	3.712356218	4.35391284	4.616044463	4.972590786	5.11327804	3.798319635	4.022697528	4.539585072
Moldova		0	0	0	0	0	0	0	0	0	0	0	0	4.690747574	3.410507742	2.527576939	2.065144762	2.169802744	2.063733052	1.878929727	1.433564662	1.408579952	1.407749287	1.55049659	1.719152674	1.639101189	1.731912285	1.857147252	1.798453614	1.906158835	1.741461798	1.773704379	1.750611783
Russia		0	0	0	0	0	0	0	0	0	0	0	0	13.60910405	12.54867691	11.36328122	10.77630278	10.13536903	9.406066108	9.344953207	9.877725029	10.19199509	9.855926805	10.31250777	10.7227574	11.10844045	11.07682917	11.46123596	11.09658942	11.55671997	10.9120973	11.52266933	12.54607302
Tajikistan		0	0	0	0	0	0	0	0	0	0	0	0	1.446873926	0.941831346	0.90418932	0.633507273	0.816558994	0.812368599	0.856184267	0.906949267	0.955712153	0.974714076	0.93891206	1.015929109	1.063004322	1.089251466	1.068246818	1.021291298	0.952905484	0.331721356	0.354534029	0.343204584
Turkmenistan		0	0	0	0	0	0	0	0	0	0	0	0	5.339585351	4.873709788	4.5563076	4.548094627	4.393248798	4.623933191	4.127451164	4.410397046	5.459747942	6.695640533	7.592184106	9.660347707	10.20169167	10.28853213	10.33419359	10.89475999	11.59176532	10.38448153	10.54273091	10.3758099
Ukraine		0	0	0	0	0	0	0	0	0	0	0	0	10.27780076	9.527536402	8.001261921	8.224151154	7.171018332	6.794530396	6.635187195	6.581425384	6.629227254	6.529707726	6.75611162	7.453426138	7.285849245	7.477255682	7.107106063	7.602527524	7.621187978	5.377553151	6.189210756	6.745344326
Uzbekistan		0	0	0	0	0	0	0	0	0	0	0	0	4.440112376	5.233460927	4.330769312	4.554803699	4.398814225	4.307890041	4.182301366	4.173558744	4.301896188	4.437317666	4.488863187	4.46354244	4.663264187	4.412737581	4.518775508	4.538337259	4.648711301	3.881368586	3.809663049	4.119742184
Bahrain		22.32399229	24.30666813	24.78570672	27.32258557	23.48215643	26.84936912	27.8727612	32.33445961	26.79403788	26.72222336	28.25838986	30.48599097	25.2300658	29.00065142	27.90637885	27.28932946	26.59620769	30.237456	31.0723277	31.65027502	30.94539291	30.9410942	30.56525328	28.74098592	27.28537235	26.98856949	27.67510844	27.13858464	27.00877819	26.39849	25.92542878	24.44805302
Iran		2.942420974	2.608201961	3.092898508	3.467268009	3.228000978	3.289749427	3.277746964	3.328460214	3.335641455	3.492793689	3.478677317	3.748584669	3.768374074	3.768907471	3.953989395	4.084921393	4.038263075	4.401967055	4.400241868	4.688565397	4.68378785	4.805770706	5.194836387	5.475640723	5.710180222	6.240189805	6.522803494	6.604521841	6.825011569	7.405591541	7.340073944	8.02215423
Iraq		3.904625916	2.755758186	2.596091812	2.917220053	2.826783989	3.032315043	3.454121105	3.221631983	3.520450619	3.656166382	3.814207418	2.4293638	3.228378445	3.608762576	4.053751326	3.940481844	3.816228406	3.360150617	3.372547215	3.423431175	3.244485667	3.329040447	3.315953766	2.899867451	3.090005024	3.638094515	3.414508116	3.615641145	3.691041988	3.889784171	3.826528456	4.584074051
Israel		4.609346278	4.78929724	4.927053725	5.045209245	4.984014473	4.697760606	4.861232186	5.175717053	5.453338278	5.48551405	5.484074285	5.435604784	6.038872863	6.379780546	6.458762756	6.243592941	6.058967231	9.635594134	9.712990619	9.661043338	9.866160662	10.73817933	10.29516103	9.956866382	9.995294459	10.17981972	9.994035137	9.894267002	9.405293039	9.067149591	9.595807174	9.647344792
Jordan		2.407618898	2.735035075	2.998998995	3.096059295	3.092878732	3.081236029	3.317213566	3.533634335	3.177767583	3.113963949	3.115534385	2.646057725	2.892859818	2.776783453	3.107923902	3.164611881	3.325981045	3.142676016	3.316385818	3.304344981	3.335298083	3.191114774	3.26332399	3.406274308	3.554897763	3.675742555	3.570878477	3.31177935	3.146330367	3.130373615	3.224009652	2.850848228
Kuwait		22.93206159	16.47653593	15.43208302	16.28418975	16.18058279	14.81581468	16.36951331	17.9456979	19.53922775	21.03206734	13.01623998	45.14743767	16.75923206	20.63769119	23.7743203	24.02679124	28.3313361	29.31725619	30.53324193	29.4797347	30.16772129	28.33706657	26.99042869	29.64573656	30.88970049	33.70206411	33.07963727	31.36692062	32.09723038	33.04033347	34.00907922	31.73384496
Lebanon		2.220764481	2.024880577	1.958124834	2.01663595	1.891232057	2.164710372	2.153290261	2.202929853	1.964033079	1.481852019	1.368099925	2.342756829	2.301017748	2.865448389	3.250738115	3.454788035	3.584427849	4.124473318	4.087759433	4.246217018	4.339902413	4.188633784	4.177444166	4.18794547	4.064096178	3.863122657	3.478380203	3.219085318	3.628657114	4.841112672	4.650443003	4.695710941
Oman		3.340419071	3.328400733	3.836921437	4.202033775	5.373466748	4.923692419	5.66515482	5.542400119	4.841413488	6.011808591	6.941417091	7.604880846	6.975483246	7.329306006	7.263550961	6.611165405	6.638739623	7.946152859	9.40990076	8.652391654	8.959171675	8.926611185	9.045948967	8.661152214	9.206576177	11.1879869	12.72318609	13.22730227	15.33299578	15.82511178	17.77322658	17.39600589
Palestinian Territories		0	0	0	0	0	0	0	0	0	0	0	0	0	0	0	0	0	0.143337568	0.171552939	0.177461754	0.201981293	0.390314377	0.316558555	0.346656857	0.599199927	0.737626638	0.781358026	0.760846302	0.77027442	0.508949374	0.495858298	0.591983359
Qatar		60.51503776	58.2526683	56.47782347	45.52336515	49.40934119	40.38466032	38.38935484	37.53733582	36.83349089	36.77059739	43.324358	49.72224699	55.20118228	62.47408969	60.69382142	59.46852132	59.10426233	59.62439737	57.77165341	52.30153048	54.22462885	41.0457822	41.85805883	44.15038606	46.81239324	56.50285338	52.11702726	46.99742955	44.78293464	43.59936374	39.68463538	34.85626142
Saudi Arabia		17.65424706	16.44473122	14.66665928	13.91529468	14.59618036	13.4445528	13.57920105	13.07500949	13.14559647	12.56388129	12.95233538	13.88696639	13.80152572	13.20723948	13.18134951	12.54536434	12.96198278	12.87264802	12.699991	12.67948311	13.63273007	13.82542282	13.99049297	15.26882467	16.7569974	17.00039125	16.71663634	16.02927524	16.92135298	17.28009106	18.21590228	19.65148727
Syria		1.877224673	1.937348261	1.885752638	2.089074403	2.212805623	2.245293871	2.213835556	2.461607565	2.448201573	2.56114027	2.954024	2.563197772	2.657629971	2.820939147	2.944065433	2.760318841	2.846684452	2.914683705	3.05076726	3.168299402	3.095952703	2.922230704	3.030875466	2.983142868	2.910894523	2.728358043	2.674231693	2.571047925	2.551502331	2.831797851	2.951656695	2.804101209
United Arab Emirates		30.30290216	32.81878435	31.39766164	35.31381193	37.03011546	43.49736703	46.37519788	46.54805807	48.20230473	47.58151284	43.30211088	48.84401737	49.62782001	43.85712847	40.70814253	41.06425602	39.89340586	40.80867558	40.31038813	38.73890081	35.94643245	34.04853675	34.79574211	34.07063001	34.16697757	34.20802134	36.4110518	38.60970835	42.3691587	42.87789075	43.0931166	47.65836548
Yemen		0.704537068	0.69776063	0.797342409	0.707505641	0.868197828	0.940200741	0.91922963	0.882321955	0.882412927	0.905020611	0.921522735	0.913015567	0.915157092	0.726763965	0.687793119	0.718112365	0.71192479	0.682900104	0.698154001	0.730324116	0.757061134	0.777195343	0.830235843	0.87036136	0.843792614	0.85409987	0.905150702	0.858965571	1.027554522	0.966424799	0.893116769	0.984048722
Algeria		3.561548777	2.818103121	3.294374243	3.461533738	3.511839198	3.240290434	3.168607409	3.318975393	3.369353704	3.210089114	3.299627438	3.322253405	3.097021435	3.029580092	3.03409513	3.10851891	2.934493162	2.757075644	2.850486045	2.799489817	2.729614055	2.547129285	2.590973588	2.555223669	2.480508523	2.738395331	2.83198064	2.974657965	3.085909007	3.227369866	3.131147901	3.198561205
Angola		0.47033158	0.456255678	0.471076388	0.487137977	0.417366519	0.511010275	0.532777523	0.527242996	0.535620304	0.511848741	0.75574148	0.768245904	0.749122961	0.743415767	0.693290876	1.104392073	1.071858453	1.11045292	1.029854411	1.090997296	1.027623891	1.152759239	1.17089765	1.368493662	1.384952142	1.354334185	1.376668747	1.514307017	1.433638926	1.477260915	1.560261857	1.537403539
Benin		0.121649133	0.116784717	0.075624536	0.111157444	0.106392291	0.123002719	0.120838895	0.087501837	0.106272797	0.110226346	0.124846986	0.138766565	0.15269234	0.159686193	0.160646119	0.170407113	0.177848642	0.187580229	0.196113712	0.206701661	0.249311087	0.241295158	0.247379499	0.281837364	0.31886332	0.324771687	0.374363616	0.398002696	0.393603319	0.512711233	0.558461177	0.499167295
Botswana		1.386327292	1.356577201	1.239890795	1.137306111	1.117749665	1.3901305	1.462178246	1.66178245	1.71476273	1.895264651	2.145293806	2.134126314	2.379035197	2.269370569	2.217132016	2.352154522	2.019856533	2.036591841	2.311475614	2.280984089	2.604222233	2.252513113	2.187855777	1.974480752	2.252319079	2.371204052	2.347993901	2.170338974	2.221018929	2.171135377	2.488565079	1.860511281
Burkina Faso		0.066197756	0.06460088	0.063178465	0.061971889	0.060261645	0.056176814	0.066904533	0.068268305	0.065569752	0.058588353	0.059668414	0.066555584	0.065404808	0.068670773	0.071635678	0.069153308	0.069184691	0.102178122	0.09812825	0.095045927	0.091557032	0.089199924	0.087687208	0.087357515	0.086111608	0.07553138	0.08699811	0.093309734	0.090715597	0.108123659	0.10649552	0.086819895
Burundi		0.022823454	0.024925409	0.021400638	0.023835331	0.029185169	0.02957885	0.030002829	0.030486809	0.046188178	0.049413715	0.052687675	0.058397569	0.053917961	0.061680471	0.064462718	0.058517912	0.059172466	0.059314759	0.058687045	0.056795664	0.054563443	0.056214522	0.054840334	0.054997915	0.048553647	0.045409547	0.042560054	0.038097721	0.038870549	0.020964471	0.020150824	0.02003976
Cameroon		0.254431103	0.253217314	0.287537369	0.752899803	0.719266899	0.646745236	0.89144884	0.737986215	0.310782628	0.56628094	0.288596912	0.283685601	0.28528599	0.525044368	0.571526149	0.55395511	0.486289454	0.483017299	0.470730934	0.462432532	0.445346555	0.411827062	0.384248846	0.371242421	0.383428902	0.387841823	0.411273507	0.428317677	0.408273585	0.440098944	0.443063312	0.412264748
Cape Verde		1.009681228	0.99437042	0.437304745	0.424334848	0.507120228	0.495061378	0.165276654	0.176389358	0.250378215	0.269833219	0.283582529	0.28604792	0.299363236	0.290902141	0.308842307	0.292037465	0.297922999	0.291113861	0.284766448	0.278884462	0.406016786	0.311962596	0.323998209	0.31816283	0.64286949	0.540905227	0.611402647	0.708944628	0.657408533	0.756734108	0.745606102	0.833094362
Central African Republic		0.059337188	0.07518744	0.078500305	0.082220597	0.075420174	0.073651051	0.074476825	0.078876968	0.082223243	0.075756616	0.079832219	0.081546957	0.081995518	0.081436756	0.083690869	0.081548128	0.080886677	0.080725472	0.08045635	0.078568453	0.081558145	0.081666432	0.083283678	0.081557894	0.075691052	0.070783215	0.072990256	0.078638035	0.073235631	0.071823228	0.070296165	0.059377418
Chad		0.061076112	0.05825991	0.055591944	0.052913203	0.024641952	0.030260322	0.053279506	0.044009853	0.028916517	0.02901883	0.058141784	0.053433684	0.05239276	0.025636845	0.026147161	0.025018871	0.024522763	0.024247732	0.023535562	0.02283512	0.023974276	0.023661853	0.023697902	0.022855699	0.020592108	0.02208462	0.023366249	0.027020958	0.025892711	0.024596266	0.024096454	0.026932926
Comoros		0.121909583	0.118899019	0.11613012	0.113378312	0.112517731	0.092837365	0.096286283	0.125376778	0.130119485	0.127178487	0.16262807	0.151792404	0.149734875	0.146363676	0.149817735	0.1724538	0.16896447	0.164989621	0.167091099	0.162975368	0.176761933	0.177912027	0.179400143	0.174592414	0.174727015	0.180255513	0.178915136	0.220111426	0.177642518	0.218764945	0.184260466	0.205502223
Congo (Brazzaville)		0.430463062	0.505778134	0.410306677	0.330943475	0.325900487	0.470596415	0.406974537	0.491242004	0.372332235	0.41122899	0.503817299	0.369162317	0.35389147	1.26289103	1.214936836	1.171384906	1.129025172	1.322098006	1.273475694	1.065292432	0.971162458	0.988043173	0.896331394	0.899216519	0.877259728	1.467236404	1.46975211	1.518471569	1.526457039	1.610674316	1.646696979	1.616065769
Congo (Kinshasa)		0.117143029	0.120435867	0.120258817	0.115974692	0.105321239	0.09960288	0.111571215	0.097573946	0.115577158	0.104012689	0.093023511	0.094943795	0.103849697	0.105304179	0.079858234	0.082038635	0.081052186	0.076872898	0.071948153	0.062618454	0.051392501	0.036806029	0.032076075	0.03192278	0.04017115	0.0403209	0.038971111	0.042386599	0.040708204	0.038185884	0.044889078	0.037936008
Cote dIvoire (IvoryCoast)		0.467209185	0.476332226	0.424615787	0.441926579	0.415065896	0.413996562	0.448343269	0.480594348	0.490605243	0.471310448	0.37201222	0.291378057	0.287621795	0.315848482	0.316898842	0.305607647	0.374921882	0.333445959	0.337114281	0.426987983	0.436057041	0.338800772	0.328124991	0.320454948	0.342987444	0.336535504	0.324560714	0.312900473	0.316528573	0.316150161	0.314252949	0.310649195
Djibouti		4.461498455	3.402024186	3.305171833	2.358370258	1.934064761	1.880016744	1.811480164	1.784985102	1.713795997	3.878878969	3.467897995	3.169861227	3.247472993	3.365754168	3.330212657	3.27718207	3.196963566	3.097115563	2.955385904	2.839321635	2.765095157	2.699245299	2.61585817	2.763542662	2.949803015	2.883583433	2.473716759	2.373109825	2.404244219	1.600494052	1.566108058	1.518683873
Egypt		0.959686139	1.106836124	1.196553508	1.358946749	1.441139844	1.510464238	1.586201189	1.602485341	1.568579448	1.595816262	1.687083412	1.686845448	1.65655058	1.661847579	1.693861697	1.683685291	1.81560656	1.834888576	1.840991083	1.843506399	1.841402395	1.942110803	1.961333294	2.060760244	2.150667087	2.191682206	2.040645965	2.086544654	2.340350027	2.343561359	2.368369593	2.456971059
Equatorial Guinea		0.216749346	0.203730959	0.243099341	0.233627078	0.221681922	0.245302746	0.254548179	0.234239495	0.223688326	0.326725546	0.32646187	0.334181132	0.312126932	2.630905121	2.558512692	2.486755977	3.546850052	3.549519988	3.612830237	3.853938937	4.178420282	4.053743675	7.560718949	9.166756853	6.905244641	8.627329302	8.399794292	7.719004268	7.593615158	8.538140945	8.417442754	7.830133337
Eritrea		0	0	0	0	0	0	0	0	0	0	0	0	0	0	0.292088919	0.299955119	0.298532571	0.296401481	0.315429044	0.260672081	0.152783569	0.173884679	0.158737346	0.171724801	0.155438588	0.141716441	0.142750842	0.130905541	0.132478376	0.090969459	0.087794192	0.105325719
Ethiopia		0.047174722	0.045129002	0.047894375	0.053252059	0.052749588	0.062264679	0.06147126	0.067090895	0.061687892	0.064674145	0.063321538	0.049723566	0.07108713	0.063341027	0.040591411	0.042630065	0.02984639	0.029010464	0.043006256	0.052032806	0.05372389	0.053605857	0.057033597	0.059640045	0.060152142	0.061587292	0.067372328	0.072462054	0.079181839	0.083485351	0.074941079	0.07566163
Gabon		6.698429598	6.821397296	6.445481544	6.135298195	6.51805628	6.415814367	4.656280179	4.3960178	4.633649721	6.21894998	6.092838564	5.965546682	6.139572371	5.869013779	5.564781276	5.130936234	5.061063487	4.997515396	4.789616046	4.516940576	4.103184167	3.901611315	3.620830193	3.671204094	3.610989365	3.467675487	3.080489908	3.047231282	3.144208961	2.811483904	2.935874869	3.01773992
Gambia, The		0.233424271	0.226447413	0.220065428	0.21386771	0.226459396	0.213263087	0.199391531	0.221406874	0.219637062	0.207322554	0.202790659	0.203461457	0.1971598	0.201106891	0.213551389	0.191750039	0.185143294	0.179136552	0.183509289	0.178216621	0.194481711	0.203043135	0.202214285	0.199037388	0.196525199	0.197085102	0.204148568	0.246961004	0.226374678	0.258895219	0.274184544	0.236720323
Ghana		0.200034611	0.171535564	0.191283965	0.160192262	0.173150148	0.140536586	0.166970121	0.187875059	0.211110303	0.237008989	0.194834846	0.187568351	0.209984082	0.210135864	0.227206076	0.23010114	0.232585333	0.21356033	0.210423395	0.240226763	0.280212318	0.26726794	0.275890487	0.294146809	0.314337115	0.309560629	0.309633684	0.306902985	0.327609117	0.324752288	0.386406292	0.373545806
Guinea		0.183238633	0.176171053	0.175377102	0.173261659	0.167755442	0.140816264	0.196289437	0.202879309	0.201996531	0.191049781	0.242577777	0.176750142	0.173858764	0.173341098	0.172615539	0.16575876	0.161864399	0.1599885	0.158414289	0.15360051	0.15618754	0.156084411	0.155473399	0.151986057	0.150543135	0.150821578	0.146873492	0.141633278	0.137256781	0.142519671	0.138846943	0.133894789
Guinea-Bissau		0.105475979	0.102891978	0.101832229	0.099430776	0.132368926	0.140419859	0.111068184	0.203459096	0.222444552	0.227038534	0.283306057	0.282909569	0.279961941	0.289425152	0.286938765	0.277146581	0.274569993	0.26599727	0.261928917	0.256028023	0.277966314	0.274530215	0.279824772	0.281222425	0.276625352	0.279876393	0.270712182	0.274616711	0.307128887	0.265939138	0.260642886	0.287997595
Kenya		0.352182086	0.340552772	0.320839803	0.299768155	0.282908854	0.277127888	0.30340758	0.25908017	0.274151833	0.290291546	0.285189295	0.24152204	0.262164541	0.25903848	0.2677636	0.264151603	0.268978016	0.243773592	0.269290488	0.27107313	0.2842416	0.25373189	0.245585743	0.251437893	0.269074354	0.28766983	0.311789934	0.299424629	0.28646414	0.292411296	0.301286336	0.300980128
Lesotho		0.107414414	0.097808168	0.102546028	0.099376138	0.096571395	0.096117656	0.098449515	0.096664583	0.062699108	0.093326245	0.091712363	0.090152958	0.091797174	0.090295345	0.098636988	0.097030153	0.0961451	0.095129384	0.095998102	0.095441035	0.110539993	0.109892111	0.109719366	0.109642588	0.110026495	0.117979106	0.122248854	0.12437528	0.125201648	0.122444719	0.287161053	0.231498943
Liberia		1.016164988	0.907187663	0.882372634	0.857363571	0.749619472	0.730972592	0.574453681	0.42835048	0.472004882	0.401920937	0.270243478	0.187627775	0.183644159	0.196130347	0.199756979	0.201401899	0.206367772	0.191613626	0.176419764	0.1661063	0.169729339	0.174532333	0.18268169	0.187469311	0.189152843	0.183227079	0.196456441	0.207979351	0.200774917	0.154133376	0.145554506	0.1552673
Libya		10.60078812	8.339555144	8.330212205	7.900287171	7.261618834	7.562648394	8.180784591	8.189701567	8.970210443	9.366336088	10.34725896	9.896088578	8.48069254	8.35426649	8.443796781	8.63440818	9.05223858	9.309240239	8.725338524	8.080836129	8.33685258	8.459120513	9.222995851	8.666097544	9.585700606	10.13201006	9.17657149	9.274028499	9.633612199	9.662648174	10.0955852	8.612429688
Madagascar		0.134434057	0.11308168	0.095516792	0.120977236	0.116579779	0.123324921	0.088191692	0.119204128	0.12714856	0.087256271	0.08237778	0.082066377	0.086733653	0.086659637	0.09440214	0.094418121	0.092068096	0.090240391	0.087661255	0.084474875	0.115245774	0.122588151	0.138194833	0.138977496	0.149141739	0.139197034	0.133989906	0.130576623	0.142626659	0.091664021	0.09023765	0.08602653
Malawi		0.092004544	0.094939834	0.08249182	0.063857419	0.059114486	0.061922153	0.062538854	0.054423712	0.047674172	0.054557175	0.056007752	0.065752945	0.064187747	0.061223751	0.068613287	0.071354875	0.070623484	0.06858483	0.066278572	0.072931161	0.074821781	0.070595539	0.073539597	0.071098243	0.079061563	0.081053297	0.082894524	0.081423249	0.081638821	0.063907468	0.06248066	0.060259143
Mali		0.060864703	0.079794039	0.058468666	0.056885183	0.055866491	0.060148709	0.046738092	0.053646456	0.025904104	0.056588591	0.055148848	0.055788266	0.055884596	0.056369622	0.056080886	0.055075082	0.05537374	0.054875708	0.054111063	0.052574757	0.052538734	0.051005348	0.054241475	0.053178943	0.053443122	0.057438077	0.050555702	0.050444016	0.051029133	0.049314127	0.047830944	0.049380671
Mauritania		0.393375666	0.369397522	0.363064477	0.352569511	0.518070716	0.500786205	0.292025764	0.395775982	0.479816067	0.565035024	0.496597367	0.510912472	1.622002918	1.616220909	1.556106699	1.399285839	1.527511582	1.367368976	1.339042163	1.303560657	1.296984649	1.238012464	1.161753139	1.167373038	0.951263571	1.114188461	0.973826957	0.9104798	0.90262952	0.604734318	0.590475685	0.540441793
Mauritius		0.886385805	0.784393034	0.744163542	0.842902473	0.860628038	0.871372019	1.200636044	0.969139317	1.371284476	1.618634897	1.810050867	1.769034823	1.966749938	2.08905556	2.013785656	2.164132061	2.12693114	2.101937563	2.216480278	2.279414899	2.942585144	3.383126857	2.977231955	3.04009828	3.20481957	3.295465152	3.538394645	3.893757418	3.818661267	3.37536013	3.571895526	3.880848648
Morocco		0.843194044	0.810623887	0.82986158	0.840991035	0.785408295	0.804997184	0.900168298	0.864854477	0.875714704	0.924019312	0.943105346	0.959341025	0.954542602	1.046938161	1.126589374	1.069359329	1.083699217	1.053601357	1.052626635	1.117763722	1.109752627	1.185217934	1.168284851	1.179671172	1.123539203	1.157018704	1.179292226	1.180232362	1.203429102	1.336941433	1.368830158	1.36731756
Mozambique		0.216590292	0.189003131	0.196632803	0.180899276	0.15650509	0.162914455	0.093225418	0.089122187	0.13015687	0.103395705	0.091448421	0.090246946	0.088812276	0.085093998	0.075633374	0.077062174	0.065397863	0.065809549	0.072996681	0.073717257	0.071093234	0.081486036	0.089197995	0.094497466	0.108560947	0.117391729	0.135227897	0.119680554	0.110912099	0.115704074	0.113903678	0.149288461
Namibia		0	0	0	0	0	0	0	0	0	0	1.615509632	0.837188077	0.738492754	0.955414572	0.912166658	0.784320955	0.799961724	0.817647525	0.858707024	0.931196188	0.955409202	1.123068575	1.132189507	1.228094765	1.279615279	1.292482597	1.424151477	1.500819224	1.883399484	1.708871985	1.567412273	1.497879018
Niger		0.100151474	0.101777528	0.105827352	0.115159693	0.120175118	0.117849069	0.097748377	0.10743962	0.137687809	0.14066401	0.139664455	0.136663709	0.135362212	0.133423656	0.131573578	0.127277098	0.122113298	0.116319327	0.112606558	0.10917652	0.104883584	0.103601254	0.107146027	0.105963342	0.110735115	0.098656792	0.091969408	0.091609942	0.090811214	0.087352929	0.084575528	0.080508172
Nigeria		0.923955339	0.762282189	0.706579178	0.684516639	0.710194363	0.718555229	0.687670951	0.678589258	0.694717061	0.813564241	0.853037083	0.893259297	0.924211544	0.925395111	0.890142393	0.911882569	0.903690743	0.79762855	0.750854819	0.700250292	0.650141872	0.718037955	0.694889159	0.689994453	0.66791766	0.747241064	0.697340104	0.663126403	0.645899915	0.432014859	0.45600686	0.458100426
Reunion		1.177	1.163053227	1.247222815	1.425126565	1.547328102	1.476997579	1.427580991	1.561611626	1.854365899	1.985346737	2.051470342	2.352216749	2.259046729	2.930078008	2.928550349	2.842951894	2.799973058	2.761831298	3.478884818	3.415050262	3.504048357	3.59005134	3.51407323	3.459897771	3.479207346	3.536293155	3.513460823	3.52369872	3.520261845	3.604524076	3.550029632	3.579606909
Rwanda		0.029664348	0.066183963	0.061465036	0.068622344	0.10867471	0.111529268	0.104109087	0.102559315	0.094303358	0.099538497	0.100408325	0.099699877	0.10103349	0.089945871	0.10703048	0.128927933	0.107762058	0.091681901	0.090496702	0.088509976	0.091235127	0.089744721	0.087650172	0.086359575	0.081556416	0.084492153	0.084392963	0.073234803	0.069393349	0.071177921	0.068807107	0.076085953
Saint Helena		0	0.420972644	0.417168675	0.41037037	0.371161549	0.361460957	0.379061372	0.966360856	0.959028832	0.953242836	0.944610778	0.468053492	0.469026549	0.93128655	0.924528302	0.915107914	0.908571429	0.900849858	0.891853933	0.884401114	3.076071923	1.744505495	1.731607629	1.718538566	1.282637954	1.697860963	1.563829787	1.686507937	1.782894737	1.252617801	1.247718383	1.181818182
Sao Tome and Principe		0.34123525	0.332434674	0.326547231	0.320183761	0.314336075	0.317976773	0.325622943	0.318876611	0.312240851	0.305697654	0.597515742	0.615851602	0.636175668	0.626292226	0.641450528	0.624665723	0.618080753	0.601029601	0.58879822	0.576523571	0.654701827	0.640180744	0.647522599	0.632848316	0.619016692	0.624912704	0.669666687	0.810804249	0.802933143	0.775537478	0.766679939	0.844576904
Senegal		0.443374387	0.418595316	0.416558103	0.388059529	0.450002414	0.431847435	0.439198814	0.436571024	0.364356527	0.366304725	0.348420779	0.31196179	0.375863647	0.368095717	0.437845251	0.460225876	0.457966401	0.406168096	0.418864818	0.451703373	0.467730387	0.45387703	0.44703202	0.439193214	0.504119166	0.528254962	0.53167912	0.529918468	0.520057547	0.490481818	0.482947274	0.560620225
Seychelles		3.289444879	2.619783617	2.373621324	4.11070615	4.263909774	4.306043465	4.664652123	4.915863278	6.69132948	7.02013998	6.398022599	6.808653175	6.968827586	7.06355701	7.070281937	7.035232884	6.961960111	7.397330192	7.324089672	7.233171231	7.423446185	7.527878259	10.88697153	10.59731871	10.82716645	10.50995351	14.13242925	11.44107351	11.86374134	13.39506173	11.11093502	12.19643458
Sierra Leone		0.213191486	0.208750349	0.224174527	0.201546124	0.196682438	0.215852167	0.239674288	0.251650076	0.258880281	0.259823087	0.252055248	0.257094743	0.190865887	0.200421009	0.171032388	0.217561008	0.221571972	0.229543638	0.231589036	0.232218912	0.241096228	0.231962626	0.222504741	0.218329571	0.251660076	0.245985068	0.237725267	0.253230263	0.250953613	0.272543228	0.266643155	0.278231137
Somalia		0.193036751	0.221896445	0.217468506	0.206310781	0.206859727	0.196151143	0.214648552	0.15403627	0.155140938	0.162822387	0.150637175	0.092601416	0.092444504	0.095605325	0.093119257	0.091055381	0.088870839	0.086297304	0.083307827	0.080431835	0.096559457	0.093006875	0.090287099	0.087477045	0.085018227	0.083477434	0.0847036	0.09327882	0.091756956	0.084636661	0.083296393	0.075908455
South Africa		8.034630938	8.442442626	8.764838698	8.604528502	8.934684565	8.817821463	8.795357334	8.769264237	8.684723527	7.916978331	7.744429229	7.89762165	7.986651391	7.791514587	8.333187715	8.228352948	8.23192128	8.85269538	8.310186407	8.458960744	8.565894803	8.61683922	8.246567318	8.863307265	9.401878303	9.106602827	9.272421439	9.449015271	10.04391531	9.735661737	9.634763489	9.418919832
Sudan and South Sudan		0.1626197	0.160341488	0.168632893	0.156542836	0.140204671	0.153391991	0.184313977	0.173696747	0.182978313	0.168931416	0.149261695	0.209210471	0.18741921	0.173378381	0.149128439	0.134669058	0.130477812	0.1318586	0.129791986	0.136821279	0.195159841	0.218612745	0.247684542	0.273932105	0.293610185	0.304195732	0.322543495	0.304822013	0.300162236	0.437060663	0.436147915	0.42255944
Swaziland		1.193471364	1.084490979	1.053615672	0.788953168	0.844946434	1.008093463	0.949307464	0.94288764	0.910133867	0.899105145	0.860401543	0.766095374	0.67548122	0.586778866	0.945935352	0.909848153	0.797065233	0.933981113	0.90968423	0.903342464	0.849737309	0.837488884	0.780097344	0.725625596	0.705278888	0.592670257	0.718909205	0.807232808	0.783102115	0.733515806	0.731413168	0.747478875
Tanzania		0.102792245	0.115441022	0.110236707	0.09454796	0.100612207	0.098978775	0.121514525	0.105376652	0.108029862	0.104425993	0.113141142	0.091316663	0.098204251	0.102261181	0.08985327	0.084777504	0.084196816	0.080750723	0.080380775	0.083818308	0.082091265	0.090128945	0.099449339	0.101152377	0.112367762	0.131159685	0.13739643	0.143266297	0.147649807	0.156502699	0.145406226	0.158549323
Togo		0.221796908	0.198321794	0.185191365	0.194371894	0.221087501	0.200324021	0.167197413	0.147324728	0.15002561	0.164516811	0.156945165	0.266923207	0.182133049	0.137530423	0.157453936	0.148523285	0.143350742	0.143424204	0.139034224	0.206870756	0.280694655	0.195671692	0.244819465	0.396633339	0.406117733	0.39732471	0.397495482	0.422442812	0.441288673	0.20756564	0.214344703	0.213337586
Tunisia		1.316100124	1.412815579	1.297935879	1.460374729	1.488950565	1.47041433	1.580928846	1.410232553	1.499790449	1.621644438	1.59047886	1.551232861	1.504499394	1.744052461	1.823797105	1.609282908	1.695448799	1.884816162	1.990088283	2.029565118	2.068288881	2.229689778	2.17981261	2.120997997	2.13000924	2.226019209	2.104329819	1.848075857	1.843264339	1.803387537	1.820762676	1.930176241
Uganda		0.058426534	0.036215883	0.041991938	0.039756196	0.039656016	0.041292478	0.047047497	0.038020321	0.05544428	0.049470619	0.051000184	0.054609515	0.054467644	0.054419821	0.053816477	0.052246736	0.050511847	0.050493199	0.056888419	0.055018742	0.055170867	0.058989889	0.059946989	0.06318581	0.0617538	0.062658406	0.068896529	0.071024932	0.066413885	0.107412227	0.107596256	0.099638455
Western Sahara		1.265640116	1.130634841	1.133807829	1.022754708	1.019895592	1.003345787	1.055823681	1.048852205	1.025567195	0.987336328	0.994433454	0.95751938	0.945264505	0.884751336	0.852717477	0.876151135	0.832462996	0.79200932	0.754431206	0.719596488	0.791941719	0.7663283	0.733607338	0.702921231	0.67433832	0.733846895	0.626278119	0.636394252	0.682977661	0.566164576	0.548299154	0.624359177
Zambia		0.655199301	0.564517202	0.573829051	0.49395944	0.474308943	0.438294037	0.455527174	0.425576871	0.454424409	0.402270739	0.358457686	0.312221628	0.370273987	0.294831155	0.230201339	0.221527946	0.246111793	0.259226501	0.235685915	0.202038877	0.189966226	0.200009529	0.201914872	0.20632723	0.201657611	0.214694974	0.197796599	0.187439222	0.18235121	0.154078049	0.168356096	0.181288828
Zimbabwe		1.238166966	1.172276497	1.070482366	1.234345399	1.122580301	1.127068661	1.404983564	1.594635913	1.563845377	1.439381042	1.490918705	1.558759732	1.542425783	1.433639719	1.373211335	1.322700231	1.308060917	1.222858408	1.208454095	1.31425849	1.160726326	1.107789441	1.055929452	0.950469383	0.839347084	0.922700089	0.868898412	0.876539671	0.716806269	0.740606866	0.783863692	0.734393386
Afghanistan		0.09046954	0.114410185	0.135064962	0.169288737	0.16665257	0.165730941	0.182711764	0.302149512	0.496782909	0.475368666	0.465739946	0.217935008	0.117830812	0.101101307	0.091076834	0.074692685	0.073168706	0.068652091	0.064922115	0.063625191	0.059458136	0.037621749	0.035924439	0.027139349	0.028108418	0.02922418	0.028214222	0.047965683	0.057445177	0.225023636	0.22751078	0.221428363
American Samoa		12.40962369	13.72202381	18.36127917	11.16685268	12.42599083	11.17732332	12.00996016	11.74140401	11.12906923	12.24261789	12.23516949	11.88861437	11.99139139	11.59478396	10.99544851	10.52476349	10.49654294	10.30623548	10.13121377	9.970095073	9.764929894	9.791702829	9.994076655	10.03147954	10.04816956	10.68428446	10.6368932	11.63371783	11.85405888	10.80860987	5.13070128	7.721557971
Australia		13.60401754	13.71130236	13.71580843	14.22063426	15.17833684	15.14487896	14.75113739	15.55015084	15.01342196	15.6775062	15.78187381	15.59811639	15.77985617	16.08866979	15.83827707	16.0809635	16.61437855	17.99025211	18.12212124	18.87060607	18.70086531	19.179698	19.17538063	19.02603288	19.39752729	20.39376296	20.46272793	20.42402009	20.24229661	19.95669776	19.69290496	18.02229414
Bangladesh		0.086848896	0.088347701	0.092813322	0.082478053	0.093128487	0.09610633	0.107197028	0.115275394	0.123206728	0.131948672	0.13301148	0.130021785	0.142576553	0.149226492	0.162205961	0.185731892	0.184343397	0.189296719	0.189165247	0.207457384	0.222163594	0.241832595	0.250071016	0.264798191	0.27603694	0.28742932	0.308047777	0.314737544	0.337292309	0.360862856	0.36491559	0.370851484
Bhutan		0.012241055	0.056304795	0.067581131	0.060134575	0.0511438	0.063038549	0.058228635	0.139290268	0.138379454	0.12985107	0.203256661	0.199475234	0.218412392	0.22415856	0.35467706	0.422948562	0.460987388	0.470078631	0.464332701	0.485435589	0.482611781	0.446361895	0.483241205	0.404618095	0.339675555	0.380271797	0.356679363	0.428677508	0.416065776	0.479830425	0.47927413	0.473836512
Brunei		28.26638592	28.90312711	29.34582118	23.73608197	20.98953698	22.94863202	15.39981311	22.35009921	19.37880944	21.35851129	18.03084345	8.802352941	11.81520921	10.78104061	10.35347594	12.23723046	11.7575532	12.09643364	10.52490903	11.54391318	11.66391024	12.69180821	14.28577311	14.91807291	16.32375603	18.79596245	27.69093578	28.01297453	28.16755382	18.92882351	21.38936283	21.53897833
Burma (Myanmar)		0.120371654	0.121154524	0.131170402	0.148398106	0.158550102	0.162708784	0.130581369	0.125883901	0.117168546	0.120158422	0.115173856	0.111371968	0.110412372	0.114079508	0.134743284	0.139897322	0.139964017	0.151864663	0.175516723	0.191221435	0.21216357	0.206553474	0.22345648	0.256720887	0.254901506	0.321716583	0.293623332	0.309606027	0.28413796	0.225344583	0.222917728	0.253086123
Cambodia		0.005946125	0.005783139	0.005610425	0.047495236	0.051860848	0.05266769	0.055349556	0.053735446	0.053777874	0.051735202	0.049916093	0.049480725	0.049236105	0.046882456	0.046568145	0.125281508	0.134695392	0.158757553	0.177111249	0.175548308	0.174196735	0.202409804	0.215884737	0.232963978	0.255677753	0.268110307	0.285878428	0.30654166	0.299473884	0.287307048	0.283766487	0.298606558
China		1.470915335	1.444191184	1.488352103	1.549449168	1.653780268	1.668772483	1.74837163	1.838393394	1.930438021	1.93073448	1.896349432	1.97288516	2.01745126	2.098461671	2.227774235	2.238379809	2.313954387	2.527835228	2.563166757	2.48088616	2.589199056	2.639114946	2.956201674	3.298050214	3.675430739	4.210086135	4.55126107	4.827135674	5.07541179	5.721840562	6.012176143	6.51992954
Cook Islands		1.561354803	3.175070822	3.161123853	3.173813608	3.124013529	3.166952544	3.044759207	3.040747029	3	2.611019284	2.576400218	2.071888412	2.575349839	2.584008644	2.595005429	2.601310759	2.626512651	2.672076105	2.746835443	2.831553974	3.512568976	3.642085188	3.781518152	3.923287671	4.517388219	5.147794118	5.688499619	5.524822695	7.383048085	6.158382477	6.36205396	6.78057554
Fiji		2.057698066	1.36781236	1.550560775	1.515828013	1.102119404	1.111154033	1.407719603	1.08256562	1.121701061	1.313506951	1.420391552	1.149268933	1.188803571	1.257476986	1.311755797	1.388960804	1.429739758	1.410509031	1.347903973	1.480827952	1.781310176	1.881662206	2.159011596	2.779124857	3.180292112	3.020249594	2.689626163	2.922427856	2.724068608	1.565595855	1.519498162	1.635919966
French Polynesia		1.397614314	1.998330015	2.602044633	3.355734333	4.926704646	4.148167151	5.307019486	5.323682936	5.14344005	4.980487307	4.614945121	4.485781757	4.2277716	4.063522252	3.238347061	3.291551374	3.245519876	3.193697122	3.136029897	3.080234918	2.868190105	2.817742607	2.845120603	3.473905146	3.420135566	3.630635246	3.986799065	3.883659175	3.774117468	3.999285499	4.078491184	4.489749347
Guam		33.15925891	45.82339471	35.15657028	32.16251753	10.81832907	5.23072459	8.951009115	6.088291441	6.248451588	5.663001145	13.68567807	15.03068906	17.66212323	23.30167559	33.26159542	25.01747694	22.12124966	24.93794278	20.37543414	22.42519169	18.48622199	19.54119227	13.34617344	15.43768245	12.4186179	13.02765152	14.23722513	12.89299868	11.14230068	6.719432589	5.687260867	6.908458647
Hawaiian Trade Zone		0	0	0	0	0	0	0	0	0	0	0	0	0	0	0	0	0	0	0	0	0	0	0	0	0	0	0	0	0	0	0	0
Hong Kong		3.588757876	3.632038816	4.060332415	4.667590878	4.931982808	5.192300502	5.817146943	6.466194885	7.08646314	7.31480801	7.042071323	7.398087622	7.741722559	8.125211686	7.454731849	7.610760841	7.574808028	7.069474378	7.892930923	9.352439876	8.367316842	8.974845756	9.761827022	10.27990496	11.38845069	11.66407825	11.54076044	12.05147119	11.23911897	12.69414903	12.95860338	13.04438323
India		0.42521609	0.483121345	0.490036541	0.504310902	0.567074404	0.588962571	0.611225763	0.615431695	0.647682518	0.673150419	0.690344919	0.727222681	0.757798086	0.778988948	0.812220862	0.945305071	0.868501387	0.896476947	0.919060814	0.961472881	0.984763435	0.993149376	0.968479796	0.966964518	1.04349221	1.082884322	1.156210063	1.215346362	1.290384738	1.381066246	1.364951874	1.451228619
Indonesia		0.568657821	0.596773806	0.588004189	0.587410923	0.599404098	0.607941776	0.648867347	0.677602658	0.712291341	0.782196394	0.855434883	0.916355699	0.956136547	1.042345135	1.07639705	1.082397113	1.181402976	1.201584531	1.153591786	1.251523842	1.238988082	1.262738113	1.292167585	1.295048217	1.386674493	1.442977124	1.531097926	1.58214108	1.555822482	1.685403039	1.702999974	1.73445741
Japan		8.107492074	8.03248408	7.596071317	7.270346303	7.795548371	7.670505424	7.222911386	7.292934887	7.827610938	8.036624495	8.475027967	8.602772902	8.630679821	8.532614639	8.944124648	8.906618331	9.035049079	9.194004807	8.817641743	9.140386598	9.47681711	9.391094859	9.420839517	9.797710977	9.838078684	9.71897421	9.70729624	9.817262988	9.517752407	8.652127583	9.247581991	9.261939205
Kiribati		0.388425443	0.453550043	0.447514743	0.443651452	0.31888798	0.314686442	0.296534421	0.336331758	0.326911678	0.317913244	0.309440314	0.359482521	0.302594051	0.298379537	0.294670017	0.290958976	0.285750963	0.279332413	0.273028333	0.267098632	0.29887218	0.293222683	0.359279402	0.353400223	0.348551361	0.411167513	0.404529024	0.433389191	0.45106339	0.635197067	0.626759148	0.589041096
Korea, North		6.354794525	6.475152294	6.699702376	6.894596065	6.990039369	7.192382325	7.047816193	6.636982234	8.154005962	6.419431188	6.071709725	5.819260101	4.993198451	4.530364352	4.142795559	3.758209637	3.207499069	2.956344616	2.658900137	2.910135782	3.046039999	3.094637939	2.952174895	2.999474507	3.04990218	3.160827351	3.186100374	2.632566871	2.8932228	2.754257383	2.65846286	2.696934968
Korea, South		3.455448799	3.561306459	3.533244673	3.720609622	4.049319655	4.223013282	4.374708109	4.461345923	4.944124813	5.171073052	5.64818027	6.222311952	6.694339637	7.462493771	7.858519999	8.456556335	8.729283713	9.305396043	8.250034073	9.112133654	9.365181973	9.547884694	9.865558059	10.02687979	10.1540409	10.28640963	10.06180839	10.42690375	10.78496608	10.81118008	11.94791458	12.53118779
Laos		0.125979303	0.049439913	0.044433565	0.046856044	0.042485972	0.046910589	0.05484918	0.053099907	0.050926159	0.055069292	0.053329217	0.056432898	0.060087379	0.058325075	0.061088791	0.074296551	0.090162361	0.113013116	0.136054106	0.159578191	0.156619564	0.137526098	0.169513251	0.161963212	0.201235982	0.20322941	0.21192455	0.22045064	0.230779245	0.232242319	0.22380248	0.21682638
Macau		1.833131329	1.687119151	1.730992209	2.314626029	2.435045822	1.918094428	2.894170404	3.100625426	2.99319564	3.112999648	3.099954514	2.980514484	3.014627128	3.253668054	3.381457729	3.205008722	3.597563353	3.602844193	3.852375418	4.04998013	3.654699588	3.81832191	4.18536152	4.283038408	5.106232015	4.181676265	4.611256833	4.380320819	4.387175399	3.210038403	2.670575393	3.1508726
Malaysia		1.956172656	1.98133794	2.025040728	2.423974182	2.750932364	2.845200142	3.043316531	2.783187666	2.763108535	3.009092845	3.633805534	3.651901631	3.862399407	3.995081243	4.349124932	4.400182801	4.87809475	4.773633109	4.676939724	4.721193824	5.07852352	5.283436743	5.668172408	5.814035948	5.701868896	5.684090338	5.684083329	6.195891441	6.244956458	6.306787687	6.743668286	6.663884539
Maldives		0.091973572	0.088267091	0.085484867	0.083428229	0.326786752	0.352227862	0.443692108	0.426148483	0.440973611	0.423727185	0.450856378	0.429803714	0.428126971	0.502369284	0.957139474	1.319748254	1.316600747	1.141525516	1.209687745	1.166941128	1.610740716	1.69379883	3.046270763	3.353260699	2.296815677	1.790334572	2.374181317	2.554812724	2.301764569	2.679080564	2.683179578	2.710810127
Mongolia		4.272789615	3.714114336	4.283207007	4.31967313	4.275153716	4.642994181	4.977595879	5.096718326	5.128544661	4.661973526	4.322009975	5.048480871	4.263362022	3.785450631	3.463382834	3.584371322	2.62685933	2.156504753	2.123803031	2.080989688	2.108613389	2.120873961	2.231950593	2.09460935	2.192347862	2.181200911	2.45245152	2.499866183	2.477420496	2.569161564	2.589101758	3.259051102
Nauru		16.36964981	16.23694268	15.9325	15.6392638	15.86314526	15.35328638	17.07577497	16.69135802	16.34395604	15.99462366	16.36143309	16.05687694	16.29094608	16.30753564	16.30753564	16.63543788	16.61546287	16.54711246	16.51162791	16.54508612	16.55172414	16.50151668	17.10685484	17.08761329	17.35005015	17.5974026	18.07523511	19.3497807	20.29694323	19.70575461	19.57820928	18.10729614
Nepal		0.032504049	0.025384288	0.034360819	0.033666628	0.041905137	0.032920378	0.040757055	0.04692629	0.045225777	0.043961386	0.033270502	0.047766055	0.055464957	0.050319819	0.061771359	0.063818671	0.074047987	0.083284507	0.118004885	0.131013475	0.124836007	0.128198611	0.102887657	0.106395036	0.104471565	0.118937236	0.101735136	0.104799897	0.104627946	0.114735021	0.122402541	0.107951924
New Caledonia		12.33995696	11.44821053	7.951172414	7.264838314	8.223306161	8.405006881	8.847538244	9.366408366	8.899654193	9.859617248	9.254588514	9.819188831	9.9645027	9.706401403	9.185649507	8.974710606	9.32158748	8.391062293	8.359574887	8.098078965	9.466167906	9.341137124	10.448323	10.63927757	11.16932725	10.68795181	12.52763097	11.99509253	13.02818572	11.88917515	11.70354666	11.80938073
New Zealand		6.321524218	6.146205403	6.432717834	6.564412527	6.908322696	6.942030381	7.49544547	7.47930046	8.218611196	8.147826525	8.425074992	8.36144941	8.569051538	8.487601226	8.802029947	8.435165203	8.291749278	9.009985502	8.709014401	9.422000867	9.425604881	9.953466497	9.616143298	9.99811882	9.995025161	9.976481021	9.967852986	9.56736861	9.759489728	8.880759573	8.707324071	8.663463354
Niue		1.405	1.405	1.405	1.405	1.405	1.435	1.575	1.575	1.575	1.575	1.575	1.575	1.59	1.59	1.59	1.59	1.59	1.59	1.59	1.59	1.59	1.5	1.492957746	1.479069767	1.472222222	2.085858586	2.620879121	3.06626506	3.555555556	2.464285714	2.464285714	2.178571429
Pakistan		0.39515029	0.399682089	0.45076949	0.429085636	0.427529688	0.456582645	0.482587356	0.516027948	0.519702406	0.537920894	0.563758861	0.556966738	0.561515574	0.609844741	0.649806782	0.653502763	0.690470105	0.677254985	0.672075681	0.711678591	0.709505157	0.657854208	0.640234124	0.640790978	0.656090191	0.682358566	0.753707916	0.798362495	0.777526301	0.777146224	0.769428495	0.745502307
Papua New Guinea		0.604029651	0.587982833	0.573467068	0.559147216	0.61992437	0.636368704	0.690396077	0.745739342	0.680132183	0.677671869	0.669300511	0.645609806	0.662530232	0.652315783	0.607248178	0.620829765	0.617741112	0.602007027	0.564998468	0.54985371	0.540141997	0.526506598	0.72868289	0.822746626	0.811426281	0.778716747	0.772621264	0.7592412	0.782068453	0.544479008	0.541417952	0.529870273
Philippines		0.664775036	0.615503106	0.595614071	0.564352166	0.507402519	0.469575184	0.485290512	0.556857749	0.574391304	0.629949774	0.635927945	0.626391515	0.678022489	0.729726463	0.749365526	0.796518554	0.81110614	0.864406802	0.860261987	0.872999151	0.872648053	0.863028682	0.850725855	0.85268702	0.858171111	0.843705904	0.815042094	0.783994196	0.774654888	0.707826052	0.783533623	0.796890997
Samoa		0.584129779	0.617884663	0.669963917	0.670297523	0.87308602	0.689747418	0.723859256	0.722780881	0.721087172	0.757742134	0.792912854	0.788747022	0.810800971	0.80447869	0.760269883	0.80940257	0.802266189	0.795180723	0.788009924	0.781471733	0.811247943	0.804038472	0.832246559	0.824286266	0.851507359	0.89517047	0.869637584	0.882474995	0.933509235	0.881770561	0.87671875	0.758749223
Singapore		12.18521894	12.18395737	12.32573241	12.08008523	12.55529836	12.16094403	15.03406459	16.4708021	17.0797729	18.038296	18.94677234	19.4083305	20.91870418	22.57268656	23.63788231	23.26206164	26.84834004	26.59386539	27.0239112	26.45377142	26.49165586	26.85226455	25.75411157	25.65952417	28.099428	28.98985614	29.65234345	30.76564937	31.48502315	38.20137811	44.47699368	40.48043852
Solomon Islands		0.423278589	0.583521823	0.509577613	0.54634815	0.532934359	0.448100245	0.468559478	0.517699115	0.538614782	0.549286265	0.541494099	0.524391348	0.503976143	0.479480784	0.456286931	0.457594582	0.443995964	0.431033183	0.418577982	0.406786493	0.410209116	0.399004283	0.402186723	0.391564857	0.394602314	0.422955119	0.381171565	0.409349991	0.430420773	0.354590203	0.379738913	0.355383028
Sri Lanka		0.324028276	0.318953556	0.326612116	0.331022169	0.364352624	0.303441909	0.324837086	0.365702862	0.317187321	0.287571109	0.311990264	0.310645478	0.32748915	0.363700239	0.377029638	0.397406063	0.442286841	0.486936946	0.484160303	0.520949701	0.594958188	0.575201967	0.58262936	0.594843805	0.594262248	0.641016585	0.627425465	0.636664767	0.601141393	0.617688896	0.561531278	0.615396795
Taiwan		3.957631306	3.519461772	3.421879113	3.769575061	4.272787535	4.219494802	4.527824283	4.639382421	5.317181532	5.802943852	5.834373775	6.067838859	6.364291929	7.209631209	7.685246228	8.568582756	9.190788299	9.668880465	10.24116396	10.23205671	11.54528039	11.09327343	12.15481216	12.81005964	12.59397008	12.70785104	13.01985645	12.81645152	12.63247563	11.25323627	12.40559737	12.65434812
Thailand		0.71372031	0.717559271	0.678775911	0.715381156	0.780562824	0.867795273	0.872931209	0.973536175	1.098788956	1.285020357	1.520533829	1.661128589	1.77786336	1.995949989	2.200866808	2.464677097	2.85686924	2.934168487	2.672495579	2.790771551	2.612938655	2.757898797	2.97579138	3.247934748	3.534757568	3.763930195	3.667738343	3.791218815	3.892584339	4.0625565	4.116786656	4.041099878
Timor-Leste (East Timor)		0	0	0	0	0	0	0	0	0	0	0	0	0	0	0	0	0	0	0	0	0	0	0	0.30082534	0.31159286	0.310018289	0.308426455	0.331580758	0.339061416	0.179627519	0.175310526	0.189282961
Tonga		0.317067858	0.464204484	0.43120155	0.458788268	0.45825781	0.473405382	0.498261144	0.727530152	0.847335423	0.910928222	0.908458022	1.011920804	1.037431496	1.067354306	1.194896069	1.190862423	1.318032787	1.344008159	1.301772152	1.29273934	1.315789474	1.244543651	1.1279448	1.120383975	1.206523856	1.41500484	1.743814383	1.785173834	1.921720061	1.765219869	1.75953801	1.459592145
U.S. Pacific Islands		0	0	0	0	0	0	0	0	0	0	0	0	0	0	0	0	0	0	0	0	0	0	0	0	0	0	0	0	0	0	0	0
Vanuatu		0.99863002	0.849575919	0.829065353	0.781205841	0.784171564	0.8249833	0.899696707	0.837773248	0.960306597	0.826733333	0.848378501	0.609994293	0.403666316	0.394612591	0.386177899	0.377848652	0.370191488	0.362917154	0.356018367	0.349522378	0.440171387	0.42852781	0.44896644	0.437376226	0.442304976	0.459444572	0.43393185	0.487369985	0.500298762	0.520393694	0.508786952	0.594128909
Vietnam		0.249438706	0.236938343	0.252469534	0.249560949	0.25247762	0.27963474	0.243414573	0.270323235	0.231845305	0.252814548	0.250441768	0.253654557	0.248525716	0.302975304	0.31609062	0.406223406	0.479845703	0.498823055	0.522177739	0.549339808	0.582395762	0.61271149	0.691715864	0.731906996	0.826210867	0.873815471	0.988092973	1.043037789	1.181427907	1.181744738	1.354788647	1.244197007
Wake Island		0	0	0	0	0	0	0	0	0	0	0	0	0	0	0	0	0	0	0	0	0	0	0	0	0	0	0	0	0	0	0	0
World		4.144065973	4.016607167	3.923998378	3.88811396	4.005230051	4.008643232	4.021483802	4.06216715	4.125482215	4.114795101	4.072587824	3.992552465	3.914751099	3.884625852	3.852528185	3.861059106	3.893458677	3.932745729	3.898620645	3.900670098	3.964943164	3.930843854	3.991531331	4.111540094	4.241174963	4.364979414	4.430336674	4.484116829	4.510740488	4.455804624	4.590048682	4.694232615
