# Supplementary material
Source: MDPI journal article supplement (https://www.mdpi.com/1099-4300/15/12/5565)
Supplement: s2 [file s2 › Sources/Figure 6b/Figure_6b.m]

%This script generates the Lorenz plot for CO_2 emission%
%Author: Qin Liu%

%read CO_2 emission data for all countries%
ce_mov=csvread('TotalCO2',0,0,[1,3,224,34]');
%read global population data%
pop_mov=csvread('Global_pop',0,0,[1,3,226,34]);
%read CO_2 emssion per capita for all countries%
cepercap_mov=csvread('cepercap',0,0,[1,3,226,34]);
format long;

%calculate cumulative population and emission for 31 years from 1980 to 2010%
for j=1:31;
    ce=ce_mov(:,j);
pop=pop_mov(:,j);
cepercap=cepercap_mov(:,j);
data=[cepercap,ce,pop];
lorentz=sortrows(data,1);
s_ce=lorentz(:,2);
s_pop=lorentz(:,3);
ceratio(:,j)=s_ce/sum(s_ce);
popratio(:,j)=s_pop/sum(s_pop);
for i=1:224;
    cm_ceratio(i,j)=sum(ceratio(1:i,j:j));
end
for i=1:224;
    cm_popratio(i,j)=sum(popratio(1:i,j:j));
end
end

%theory line (exponential)%
x4=0:0.0001:1;
y4=x4+(1-x4).*log(1-x4);
%diagonal line%
x5=0:0.0001:1;
y5=1-x5;
y6=x5;
plot(x4,y4,'k-','linewidth',1.5);
hold on
%Lorenz curve%
plot(cm_popratio(:,1),cm_ceratio(:,1),'.-','Color',[0 0 1]);
hold on
plot(cm_popratio(:,11),cm_ceratio(:,11),'.-','Color',[.3 .2 0]);
hold on
plot(cm_popratio(:,21),cm_ceratio(:,21),'.-','Color',[0 .4 .3]);
hold on
plot(cm_popratio(:,31),cm_ceratio(:,31),'r.-');
hold on

%diagonal line%
plot(x5,y5,'k--');
hold on
plot(x5,y6,'k.','markersize',1.5);
hold on

%highlight few points representing important countries%
highlitx1=[cm_popratio(86,1),cm_popratio(127,1),cm_popratio(130,1),cm_popratio(188,1),cm_popratio(195,1),cm_popratio(197,1),cm_popratio(214,1)];
highlity1=[cm_ceratio(86,1),cm_ceratio(127,1),cm_ceratio(130,1),cm_ceratio(188,1),cm_ceratio(195,1),cm_ceratio(197,1),cm_ceratio(214,1)];
plot(highlitx1,highlity1,'b.','Markersize',25);
hold on
highlitx32=[cm_popratio(79,31),cm_popratio(101,31),cm_popratio(151,31),cm_popratio(152,31),cm_popratio(174,31),cm_popratio(194,31),cm_popratio(210,31)];
highlity32=[cm_ceratio(79,31),cm_ceratio(101,31),cm_ceratio(151,31),cm_ceratio(152,31),cm_ceratio(174,31),cm_ceratio(194,31),cm_ceratio(210,31)];
plot(highlitx32,highlity32,'r.','Markersize',25);
hold off

%set axis properties%
axis([0,1,0,1]);
set(gca,'xtick',[0:0.1:1])
set(gca,'ytick',[0:0.1:1])
axis square;

%Labels, title and legend properties%
%Labels positions may not be acurate%
t6=text(0.03,0.6,'Data source: EIA');
t7=text(.88,.95,'USA');
t8=text(.665,.47,'CHN');
t9=text(.80,.72,'RUS');
t10=text(.46,.21,'FRA');
t11=text(.75,.54,'UK');
t12=text(.375,.15,'BRA');
t13=text(.31,.10,'IND');
t14=text(.23,.07,'IND');
t15=text(.57,.07,'CHN');
t16=text(.68,.1,'BRA');
t17=text(.845,.38,'UK');
t18=text(.83,.31,'FRA');
t18a=text(1.01,0.95,'USA');
t18b=text(0.915,0.57,'USSR');
set(t6,'Fontsize',15);
set(t7,'Fontsize',16,'Color','r');
set(t8,'Fontsize',16,'Color','r');
set(t9,'Fontsize',16,'Color','r');
set(t10,'Fontsize',16,'Color','r');
set(t11,'Fontsize',16,'Color','r');
set(t12,'Fontsize',16,'Color','r');
set(t13,'Fontsize',16,'Color','r');
set(t14,'Fontsize',16,'Color','b');
set(t15,'Fontsize',16,'Color','b');
set(t16,'Fontsize',16,'Color','b');
set(t17,'Fontsize',16,'Color','b');
set(t18,'Fontsize',16,'Color','b');
set(t18a,'Fontsize',16,'Color','b');
set(t18b,'Fontsize',16,'Color','b');

t=title('Lorenz Plot of Global CO_{2} Emission');
t19=xlabel('Fraction of the World Population');
t20=ylabel('Fraction of the World CO_{2} Emission');

set(t,'Fontsize',18);
set(t19,'Fontsize',18);
set(t20,'Fontsize',18);
h=legend('Exponential G=0.50','1980 G=0.64','1990 G=0.62','2000 G=0.58','2010 G=0.52',2);
set(h,'Fontsize',18);
tightinset=get(gca,'TightInset');
position(1)=tightinset(1);
position(2)=tightinset(2);
position(3)=1-tightinset(1)-tightinset(3);
position(4)=1-tightinset(2)-tightinset(4);
set(gca,'Position',position);
