# Supplementary material
Source: MDPI journal article supplement (https://www.mdpi.com/1099-4300/15/12/5565)
Supplement: s2 [file s2 › Sources/Figure 7/Figure_7b.csv]

		1980		1990		2000		2010		1980		*Theoretical data calculation will need cumulative emission data as input	1980	1990	2000	2010
		empirical population	theoretical population	emperical pop	theoretical population	empirical population	theoretical population	empirical pop	theoretical population	1981			CO2 emission cumulative data	CO2 emission cumulative data	CO2 emission cumulative data	CO2 emission cumulative data
Greenland		0	0	0	0	0	0	0	0	1982			0	0	0	0
Antarctica		0	0	0	0	0	0	0	0	1983			0	0	0	0
Aruba		0	0	0	0	0	0	0	0	1984			0	0	0	0
Turks and Caicos Islands		0	0	0	0	0	0	0	0	1985			0	0	0	0
Bosnia and Herzegovina		0	0	0	0	0	0	0	0	1986			0	0	0	0
Croatia		0	0	0	0	0	0	0	0	1987			0	0	0	0
Czech Republic		0	0	0	0	0	0	0	0	1988			0	0	0	0
Faroe Islands		0	0	0	0	0	0	0	0	1989			0	0	0	0
Former Serbia and Montenegro		0	0	0	0	0	0	0	0	1990			0	0	0	0
Germany		0	0	0	0	0	0	0	0	1991			0	0	0	0
Macedonia		0	0	0	0	0	0	0.001437104	0.01096735	1992			0	0	0	6.06053E-05
Montenegro		0	0	0	0	0	0	0.002973338	0.011696311	1993			0	0	0	6.86701E-05
Serbia		0	0	0	0	0	0	0.013151009	0.018285274	1994			0	0	0	0.000168204
Slovakia		0	0	0	0	0	0	0.015275766	0.019447727	1995			0	0	0	0.000190345
Slovenia		0	0	0	0	0.001306187	0.003845	0.017526542	0.020949197	1996			0	0	7.90056E-06	0.000220983
Armenia		0	0	0	0	0.00993089	0.01543	0.019137451	0.022060044	1997			0	0	0.000119729	0.000245132
Azerbaijan		0	0	0	0	0.011704939	0.016878	0.019843381	0.022539422	1998			0	0	0.000143244	0.000255943
Belarus		0	0	0	0	0.022289909	0.02385	0.032380253	0.030198363	1999			0	0	0.000286715	0.000460631
Estonia		0	0	0	0	0.023411914	0.024511	0.033803482	0.031029024	2000			0	0	0.000302161	0.000486458
Georgia		0	0	0	0	0.027180502	0.02651298	0.036028398	0.032303049	2001			0	0	0.000354617	0.000527454
Kazakhstan		0	0	0	0	0.030874309	0.02849958	0.036872463	0.032790984	2002			0	0	0.000410027	0.000543599
Kyrgyzstan		0	0	0	0	0.033833912	0.0303	0.039909917	0.034534831	2003			0	0	0.000463112	0.000603313
Latvia		0	0	0	0	0.03577469	0.0314478	0.042276427	0.036062702	2004			0	0	0.000499748	0.00065822
Lithuania		0	0	0	0	0.036429185	0.0318664	0.046867183	0.03888036	2005			0	0	0.000513215	0.000765832
Moldova		0	0	0	0	0.04188788	0.03518189	0.050133514	0.040872235	2006			0	0	0.000626271	0.000846888
Russia		0	0	0	0	0.043269013	0.0360584	0.054351939	0.043482678	2007			0	0	0.000658062	0.00095938
Tajikistan		0	0	0	0	0.045174638	0.0372374	0.0558562	0.044494186	2008			0	0	0.000702081	0.001004883
Turkmenistan		0	0	0	0	0.046408118	0.0380208	0.062309206	0.04877459	2009			0	0	0.00073213	0.001209305
Ukraine		0	0	0	0	0.048171915	0.039206	0.06284614	0.049113891	2010			0	0	0.000778803	0.001226332
Uzbekistan		0	0	0	0	0.048487057	0.0394251	0.064746405	0.050478429				0	0	0.000787592	0.001296031
Palestinian Territories		0	0	0	0	0.051070991	0.0412499	0.064904884	0.05059515				0	0	0.000862722	0.001302084
Eritrea		0	0	0	0	0.05515238	0.04416399	0.065007769	0.050674631				0	0	0.000991267	0.001306214
Namibia		0	0	0	0	0.055842635	0.04477868	0.065967561	0.051529097				0	0	0.001017874	0.001351034
Saint Helena		0	0	0	0	0.057215874	0.04594432	0.067373456	0.052785251				0	0	0.001071986	0.001418322
Hawaiian Trade Zone		0	0	0	0	0.058103487	0.04668395	0.075156188	0.059336397				0	0	0.00110706	0.001796294
Timor-Leste (East Timor)		0	0	0.003601373	0.014796	0.058531172	0.0470654	0.07608406	0.060071301				0	0.000109951	0.001125374	0.001841535
U.S. Pacific Islands		0	0	0.005373885	0.016204	0.06056234	0.04888118	0.080327092	0.063372402				0	0.000131676	0.001214641	0.002051846
Wake Island		0	0	0.00850526	0.018386	0.060651989	0.048960889	0.080555139	0.063569871				0	0.00017089	0.001218639	0.002064795
Cambodia		0.0015486	0.001637576	0.009552708	0.019122	0.062035503	0.05019953	0.081319463	0.064242211				2.22303E-06	0.000184441	0.001281626	0.002109196
Bhutan		0.0016488	2.24E-03	0.010349405	0.019683	0.063677369	0.05170424	0.081575242	0.064471897				2.51936E-06	0.000194873	0.001360316	0.002124475
Burundi		0.002639422	3.84E-03	0.011955277	0.020733	0.063900461	0.05191	0.083681213	0.06639578				7.84357E-06	0.000216619	0.001371263	0.00225467
Rwanda		0.00379494	5.57E-03	0.013761561	0.021874	0.069387124	0.05674616	0.0839609	0.066649968				1.61186E-05	0.00024146	0.001641413	0.002272168
Nepal		0.007091921	9.15E-03	0.014866866	0.022546	0.069898584	0.0571905	0.089911944	0.072083456				4.19896E-05	0.00025724	0.001667476	0.002662789
Ethiopia		0.01519349	1.63E-02	0.016448932	0.023571	0.077699987	0.0638777	0.092980313	0.074836759				0.000134255	0.000280419	0.002085066	0.002872862
Uganda		0.017895712	1.85E-02	0.02544707	0.028842	0.099432407	0.0801708	0.094071277	0.075912028				0.000172369	0.000420324	0.00330318	0.002957127
Central African Republic		0.018423755	1.89E-02	0.026030805	0.02925	0.100058813	0.080625	0.116818493	0.096025702				0.000179933	0.000431767	0.003341282	0.004765564
Mali		0.019967795	2.01E-02	0.028231963	0.030695	0.101147339	0.08143568	0.116899971	0.096092451				0.00020262	0.00047629	0.00340975	0.004772305
Chad		0.0209845	2.07E-02	0.030689762	0.032411	0.10135765	0.081609122	0.120334409	0.098910723				0.000217611	0.000531479	0.003424499	0.005061428
Burkina Faso		0.02240493	2.18E-02	0.031012051	0.032653	0.104479108	0.0841596	0.126538666	0.104409647				0.000240311	0.000538737	0.003645173	0.005650959
Bangladesh		0.042174639	3.60E-02	0.038420172	0.037393	0.105300023	0.0848182	0.129349917	0.106840532				0.00065481	0.000707949	0.003703308	0.00592232
Afghanistan		0.045556835	3.79E-02	0.039744576	0.038249	0.110333216	0.088793	0.15289651	0.125758174				0.000728678	0.000740601	0.004064251	0.0082616
Maldives		0.045591202	3.80E-02	0.041030875	0.039111	0.110347214	0.088804	0.152998482	0.125837367				0.000729442	0.000775134	0.004065307	0.008272247
Malawi		0.046998309	3.88E-02	0.045724406	0.042265	0.11041795	0.088882	0.154794039	0.12723381				0.000760695	0.000905526	0.004072553	0.008461169
Niger		0.048368218	3.96E-02	0.053380885	0.046995	0.110489278	0.0889615	0.155394209	0.127709286				0.000793816	0.001122053	0.004079935	0.008526005
Tanzania		0.05256181	4.21E-02	0.054271243	0.047553	0.113265976	0.09217917	0.155429943	0.127738273				0.000897881	0.001149347	0.004385412	0.008529966
Guinea-Bissau		0.052739167	4.22E-02	0.075503981	0.060095	0.113297448	0.0922153	0.156313573	0.128498497				0.000902397	0.001842812	0.004388907	0.008634194
Lesotho		0.053044595	4.24E-02	0.076984708	0.060912	0.115820637	0.095098237	0.15638519	0.128560682				0.000910317	0.001893592	0.004672408	0.008642749
Congo (Kinshasa)		0.059566698	4.64E-02	0.081921203	0.063725	0.117377876	0.0969188	0.157704695	0.129721705				0.001094761	0.002074516	0.004856171	0.00880329
Burma (Myanmar)		0.067061255	5.08E-02	0.083187464	0.0644197	0.117477513	0.097037756	0.160776711	0.132396946				0.001312546	0.002121353	0.004868302	0.00917911
Benin		0.067838682	5.12E-02	0.083891507	0.064824	0.118268985	0.098088415	0.161243704	0.13281923				0.001335377	0.002148485	0.004976159	0.009239186
Comoros		0.067915065	5.13E-02	0.083972953	0.064884	0.131289939	0.1150633	0.161258198	0.132833116				0.001337625	0.002151737	0.006889392	0.009241165
Laos		0.06865542	5.17E-02	0.086915081	0.066937	0.134421292	0.118842462	0.162187188	0.133818829				0.001360142	0.00229249	0.007359422	0.009382213
Madagascar		0.070609351	5.29E-02	0.087095034	0.067067	0.154847393	0.14273943	0.162384479	0.134037471				0.001423554	0.002301451	0.010709852	0.009413651
Haiti		0.07184757	5.37E-02	0.087211355	0.067153	0.154870529	0.142764248	0.162458593	0.134121097				0.00146967	0.002307256	0.010713674	0.00942569
Sudan and South Sudan		0.076220414	5.67E-02	0.088369081	0.068138	0.155761568	0.143719838	0.16248421	0.1341508				0.001641341	0.002376214	0.010861408	0.009429968
Guinea		0.077220254	5.75E-02	0.101095586	0.078426	0.180828784	0.170011205	0.189352881	0.162224523				0.001685569	0.003158824	0.015348538	0.013933956
Somalia		0.078522738	5.85E-02	0.101895641	0.079023	0.181874598	0.17102822	0.203908822	0.175651075				0.001746267	0.00320834	0.015538675	0.016418694
Ghana		0.081030013	6.05E-02	0.102300303	0.079351	0.184737252	0.173916412	0.205606554	0.177145035				0.001867345	0.003235192	0.016085448	0.016708624
Sierra Leone		0.081779781	6.11E-02	0.102488763	0.079508	0.185537502	0.173916412	0.20642315	0.177869629				0.001905933	0.003248302	0.016239089	0.016850221
Mozambique		0.084500642	6.33E-02	0.102553052	0.07968	0.185592808	0.174776059	0.208397514	0.179700167				0.0020482	0.003252779	0.016250139	0.017210783
Equatorial Guinea		0.084558197	6.34E-02	0.106973383	0.083208	0.185621786	0.17480693	0.20842549	0.179727138				0.002051212	0.003562319	0.01625607	0.017216126
Togo		0.085148454	6.38E-02	0.109222155	0.0850288	0.187444738	0.176751353	0.211848877	0.183055209				0.002082817	0.003721675	0.01663196	0.017882238
Gambia, The		0.085295137	6.40E-02	0.109235644	0.08504	0.187632859	0.176958575	0.213012975	0.184242391				0.002091083	0.0037227	0.01667229	0.01812313
Vietnam		0.097371168	7.41E-02	0.112426192	0.087741	0.200989969	0.19140404	0.213894789	0.185162103				0.002818271	0.003967119	0.019613043	0.018310937
Cameroon		0.099341115	7.57E-02	0.112496412	0.087806	0.201951982	0.192476575	0.213895907	0.185163588				0.00293927	0.003972748	0.019841621	0.018311241
Tonga		0.099361755	7.57E-02	0.113886718	0.089091	0.202263361	0.192827308	0.21433112	0.185751827				0.00294085	0.004091693	0.019916678	0.018431906
Sri Lanka		0.102746576	7.90E-02	0.115325421	0.090431	0.203287846	0.193976631	0.215780507	0.187787556				0.003205625	0.004218323	0.020163702	0.018852775
Sao Tome and Principe		0.102767725	7.90E-02	0.117688932	0.09268	0.204073466	0.194865365	0.228831455	0.205384619				0.003207368	0.004434219	0.020355841	0.022704864
Kenya		0.106439126	8.27E-02	0.119385383	0.094472	0.204583914	0.195441445	0.399758978	0.358106306				0.003519514	0.004610035	0.02048091	0.073533922
Dominica		0.106455737	8.27E-02	0.11942637	0.0945219	0.370071716	0.329790947	0.404367247	0.361189427				0.003520968	0.004614573	0.061596342	0.074908186
Saint Vincent/Grenadines		0.106477801	8.28E-02	0.121993745	0.0974258	0.372157375	0.331138836	0.405155579	0.361718574				0.003523026	0.004908177	0.062137077	0.075145541
Kiribati		0.106490737	8.28E-02	0.122960619	0.0985024	0.372676771	0.33147515	0.405825942	0.36216921				0.003524239	0.005019254	0.06227242	0.075348025
Mauritania		0.106838057	8.32E-02	0.123324862	0.0989322	0.376919125	0.334234529	0.410043802	0.365110847				0.003557223	0.005063669	0.063389274	0.076677621
Pakistan		0.12599667	0.101966144	0.123753632	0.0994427	0.381542362	0.337397873	0.410089629	0.365143573				0.005384839	0.005116711	0.064683706	0.076692489
Solomon Islands		0.126048551	0.10201543	0.124548444	0.10041163	0.381554008	0.337405893	0.416530554	0.369715427				0.005390141	0.005218777	0.064687007	0.078786242
India		0.280022192	0.198698876	0.124609208	0.100487205	0.382901706	0.338337382	0.416658188	0.369806952				0.021195879	0.005226856	0.065071056	0.078828495
Congo (Brazzaville)		0.280398599	0.198875369	0.125298638	0.101364386	0.38484553	0.339712223	0.417316224	0.370289554				0.021234995	0.005320323	0.065640294	0.079051511
El Salvador		0.281426099	0.199362294	0.147780905	0.127022891	0.38486224	0.339724025	0.419799452	0.372108978				0.021343113	0.008432491	0.065645193	0.079895617
Paraguay		0.282139126	0.199700282	0.148688026	0.127952005	0.420195949	0.365138385	0.419907351	0.372188073				0.021418335	0.008559202	0.076690132	0.079932432
Senegal		0.283400642	0.20030539	0.148709963	0.127975506	0.420834446	0.365595085	0.42021748	0.372415479				0.021553363	0.00856242	0.076897797	0.080038334
Cote dIvoire (IvoryCoast)		0.285332543	0.201277574	0.161025789	0.141274714	0.421245718	0.365890663	0.420818646	0.372878049				0.021771262	0.010485516	0.077032374	0.080254005
Angola		0.286952524	0.202094157	0.16172265	0.142024496	0.421262184	0.365902662	0.456286519	0.399821159				0.0219552	0.01060004	0.07703784	0.093413296
Honduras		0.287717453	0.202501842	0.320318132	0.26099858	0.421949627	0.366438438	0.45630191	0.399832716				0.022047345	0.037483583	0.077282141	0.093419196
Grenada		0.287737723	0.202512811	0.320338452	0.261010578	0.422761546	0.36709309	0.456845651	0.400243989				0.022049827	0.037487212	0.077581261	0.093629311
Indonesia		0.321657643	0.222026896	0.322133261	0.262109002	0.429160419	0.372279545	0.45685626	0.40025204				0.026706381	0.037820271	0.07997502	0.093633427
Samoa		0.321693398	0.222046978	0.323377167	0.2628823	0.429178157	0.372294407	0.458389809	0.40143962				0.026711423	0.03805573	0.079981941	0.094241749
Papua New Guinea		0.322333314	0.222418254	0.323407978	0.262901976	0.429178486	0.372294691	0.458404994	0.401451712				0.026804735	0.038061729	0.079982073	0.094247955
Guatemala		0.323828248	0.223312853	0.323421225	0.26291089	0.429227818	0.372337738	0.459836373	0.402604106				0.027030301	0.038064448	0.080002121	0.094840529
Zambia		0.325073809	0.224090892	0.32345034	0.262930772	0.431274558	0.374121129	0.459945431	0.402704766				0.027227315	0.038070513	0.080835277	0.094892395
Nicaragua		0.325703974	0.22448465	0.341745973	0.27515795	0.43140693	0.374248055	0.462100495	0.404712497				0.027327319	0.041902684	0.080894767	0.095930445
Philippines		0.337156137	0.231585713	0.376247931	0.296675675	0.442122365	0.384680348	0.490634485	0.431159676				0.029165215	0.049149717	0.085872888	0.110245273
Yemen		0.339209279	0.232907029	0.376414747	0.296775795	0.443515092	0.386027042	0.502359627	0.441709067				0.029514421	0.04918496	0.086528335	0.116295202
Thailand		0.349781417	0.239664534	0.376560735	0.29686465	0.472181555	0.413996547	0.502359831	0.441709254				0.031336007	0.049216251	0.100818958	0.116295311
Bolivia		0.351004708	0.24054668	0.377132794	0.29722571	0.472711055	0.414502249	0.502655511	0.441984168				0.031578223	0.049343512	0.101089438	0.116455619
Morocco		0.355385756	0.243762934	0.377151005	0.29723723	0.47427466	0.416022799	0.502671221	0.441998832				0.032470016	0.049347574	0.101905354	0.116464174
Mauritius		0.355602411	0.243928799	0.379500362	0.298739	0.47471272	0.416455754	0.504288314	0.443537095				0.032516377	0.049879173	0.102138398	0.11736371
Saint Lucia		0.355629947	0.243950499	0.383580867	0.3013569	0.474841907	0.416585548	0.504769298	0.44399521				0.032522445	0.050812834	0.102208324	0.117632425
Nigeria		0.372452648	0.256965742	0.388122115	0.304272416	0.474867118	0.416611145	0.504792745	0.444017531				0.036274813	0.051864468	0.102222118	0.117645527
Dominican Republic		0.373733393	0.257956708	0.388123379	0.30427322	0.474874627	0.416619215	0.505242524	0.444449439				0.036569804	0.051864762	0.102226467	0.117899233
Egypt		0.383318243	0.265278284	0.388164509	0.304300907	0.682681976	0.604868505	0.508786896	0.447923342				0.038790419	0.051874805	0.237974422	0.119952062
Costa Rica		0.383835122	0.265677163	0.388190538	0.304322356	0.682958202	0.60506391	0.508869651	0.44800438				0.038913487	0.051882588	0.238155911	0.12000021
Vanuatu		0.383861378	0.26569766	0.394462624	0.309571669	0.693138465	0.612217532	0.508927299	0.448061087				0.038919817	0.053807255	0.244867033	0.120033909
Cape Verde		0.383928025	0.265750255	0.395802979	0.310705632	0.693179249	0.612246426	0.509152451	0.44830331				0.038936062	0.054228255	0.244894406	0.12017792
Liberia		0.38434553	0.26608157	0.395820803	0.310721012	0.69318295	0.612249071	0.512386823	0.45178186				0.039038482	0.054233978	0.244896911	0.122257801
Saint Kitts and Nevis		0.384355325	0.266090437	0.39647175	0.311307996	0.698221425	0.615893436	0.512483969	0.451889049				0.039041225	0.05445265	0.248366734	0.122322241
Reunion		0.384469981	0.26619572	0.3966117	0.311438833	0.698331512	0.615973691	0.517722039	0.457778914				0.039073804	0.05450146	0.248443533	0.125895444
Swaziland		0.384607447	0.266323646	0.397195463	0.3119983	0.698831866	0.616346832	0.519077337	0.459305352				0.03911341	0.054710487	0.248800827	0.126831899
Zimbabwe		0.386219371	0.26787417	0.399147831	0.313866093	0.698870656	0.616376129	0.519492192	0.459778765				0.039595227	0.055411478	0.248828895	0.127123208
Peru		0.390107629	0.271642794	0.401069546	0.315727046	0.699065684	0.616527219	0.520425737	0.46084192				0.040780011	0.056114992	0.248973683	0.127778921
Western Sahara		0.390135515	0.271669675	0.411513808	0.32580832	0.700886469	0.617946918	0.531762174	0.474405079				0.040788532	0.060014442	0.250337077	0.136329562
Tunisia		0.391584044	0.273116963	0.411514186	0.32580869	0.711958887	0.626552544	0.534961747	0.478151756				0.041248762	0.060014589	0.258715029	0.138752902
Botswana		0.391786487	0.273329262	0.411522069	0.3258164	0.715705914	0.629464487	0.535284916	0.478534442				0.041316514	0.060017661	0.261594611	0.139001933
French Polynesia		0.391820411	0.273329262	0.439793165	0.3524346	0.715707103	0.629465416	0.535405386	0.478677512				0.041327961	0.071044496	0.261595534	0.139095107
Niue		0.391820861	0.273365587	0.441346084	0.3538269	0.718415827	0.631590351	0.535837664	0.479192894				0.041328113	0.071650962	0.263711292	0.139431075
Montserrat		0.391823507	0.273368456	0.441624344	0.354079	0.718806594	0.631896714	0.53602622	0.479417738				0.041329029	0.071761341	0.264017341	0.139577806
Guadeloupe		0.39189927	0.273450922	0.44166046	0.354112853	0.722536207	0.634938888	0.536105755	0.479515362				0.041355368	0.071775891	0.26707027	0.139641545
China		0.613283678	0.447950501	0.452049973	0.3637918	0.723307094	0.635582058	0.536407668	0.479886574				0.119968197	0.076079782	0.267718953	0.139884077
Colombia		0.619270816	0.451553471	0.452250848	0.3639892	0.723383406	0.635648199	0.540467842	0.485002964				0.122120568	0.076169061	0.267785726	0.143253952
Turkey		0.629398315	0.457693862	0.45286485	0.364612	0.723501209	0.635751335	0.540474138	0.485010871				0.125843392	0.0764513	0.26788987	0.143259199
Brazil		0.656615359	0.473767685	0.670157099	0.53328443	0.723503891	0.635753689	0.544797435	0.49039937				0.135919961	0.177630712	0.267892247	0.146863348
Cook Islands		0.656619408	0.473770062	0.670270217	0.5333592	0.725999375	0.637990892	0.544801754	0.490404725				0.135921487	0.177687692	0.270158539	0.146866958
Belize		0.656651876	0.473789124	0.670509505	0.53352453	0.726600346	0.63853244	0.561189011	0.510179842				0.135933725	0.177813741	0.270709204	0.160586878
Ecuador		0.65843253	0.474868067	0.681211854	0.5413273	0.726671346	0.63859677	0.561705582	0.51081358				0.136627571	0.183829393	0.27077467	0.161039598
Macau		0.658490032	0.474907572	0.683673185	0.5432218	0.732811257	0.644195056	0.56174475	0.510862251				0.136653018	0.185309939	0.276515973	0.161074401
Guyana		0.658660746	0.475027312	0.683676665	0.543224677	0.74924436	0.659255566	0.571410265	0.522780062				0.136730166	0.185312141	0.292402427	0.169743342
Syria		0.660628426	0.476408275	0.686041901	0.545407504	0.749870183	0.659838046	0.577434169	0.530185143				0.137621889	0.187027749	0.293030036	0.175279209
Martinique		0.660701716	0.476461498	0.686108461	0.54547176	0.750073516	0.660033195	0.577467732	0.530226605				0.137656329	0.187078412	0.293240528	0.175310532
Malaysia		0.663727759	0.478662543	0.692359417	0.5514706	0.750503661	0.660449389	0.578121492	0.531048632				0.139085357	0.191848253	0.293689817	0.175932297
Uruguay		0.664386579	0.479142191	0.692977511	0.552059	0.754195166	0.664014983	0.578189816	0.53113774				0.139398	0.192321096	0.297559917	0.175999783
Virgin Islands, British		0.664389052	0.479144035	0.69342161	0.552495	0.754526456	0.664335029	0.578790885	0.531940819				0.139399203	0.192671302	0.297909141	0.17660876
Fiji		0.6645317	0.479252653	0.693424579	0.5524986	0.754607281	0.664413073	0.581232884	0.535236973				0.139470064	0.192673644	0.297994346	0.179122704
Chile		0.66700434	0.481230941	0.698191088	0.557269	0.75467814	0.664481723	0.581274505	0.535295369				0.14076464	0.196535489	0.29806931	0.179167452
Lebanon		0.667656014	0.481762869	0.700179144	0.55928156	0.75879631	0.668551795	0.582838758	0.537533798				0.141114015	0.198179322	0.302538936	0.180888279
Jordan		0.668142241	0.482192537	0.700273601	0.559379	0.759419829	0.669169511	0.582846841	0.537545512				0.141396624	0.198259754	0.303221646	0.180897313
Portugal		0.670340446	0.484130109	0.711267237	0.570659	0.759896658	0.669654457	0.583343793	0.538265246				0.14267547	0.207650175	0.303758424	0.181452937
Panama		0.670780989	0.484572184	0.711269267	0.57066181	0.760622027	0.670406708	0.584799725	0.540367051				0.142968269	0.20765193	0.304592487	0.183081929
Iran		0.679708142	0.494009043	0.727336534	0.5868978	0.771908603	0.682229985	0.585931832	0.542078733				0.149309544	0.22169065	0.317929739	0.184415657
Cuba		0.681878286	0.496386208	0.727415264	0.586977	0.775715871	0.686460427	0.585939102	0.542089708				0.150934548	0.221760663	0.322807919	0.184424229
Argentina		0.688256268	0.503654757	0.730798918	0.5903755	0.777107639	0.688022532	0.586505151	0.542979968				0.155973084	0.224779761	0.324623592	0.185120461
Seychelles		0.688270645	0.503671055	0.730872713	0.590451	0.777170953	0.688095778	0.586528381	0.543016725				0.155984501	0.224846766	0.32470892	0.185149244
Albania		0.68887122	0.504356707	0.734305136	0.594034	0.778839715	0.690061666	0.595990574	0.558435384				0.156465285	0.228061423	0.327005504	0.197486816
Oman		0.689137735	0.504662773	0.734724737	0.594527	0.779560916	0.690908758	0.789798606	0.782926201				0.156680207	0.228506722	0.327998931	0.451342088
Korea, South		0.697708616	0.514694478	0.734792774	0.594608	0.779590325	0.690943984	0.796415879	0.788716505				0.16382992	0.228579624	0.328040292	0.460264803
Malta		0.697790449	0.514788971	0.736670334	0.596861	0.783453748	0.695663724	0.796417553	0.788717998				0.163898246	0.230619982	0.333618589	0.460267124
Jamaica		0.698291519	0.51537307	0.736708089	0.596908	0.785103756	0.697752108	0.797459166	0.789647471				0.164321001	0.230662764	0.336110159	0.461714095
Mexico		0.713657118	0.532935188	0.737160973	0.597511	0.786803463	0.699948755	0.801425723	0.793174576				0.177364703	0.231210949	0.338746466	0.467242484
Algeria		0.71788502	0.537678449	0.737210598	0.597578	0.78684847	0.700007543	0.802222773	0.793890346				0.180999854	0.231271424	0.33881724	0.468371693
Hong Kong		0.719023285	0.538954408	0.738417148	0.599358196	0.788045226	0.701570016	0.803544908	0.795077831				0.181986012	0.232896143	0.340702531	0.470250571
Barbados		0.719079932	0.53902226	0.746528773	0.611455576	0.789330992	0.703248254	0.803604064	0.795131431				0.182038552	0.244145972	0.342736617	0.470335541
Iraq		0.722054885	0.542625208	0.75018547	0.616809216	0.799404541	0.716710315	0.805014497	0.796417444				0.184842812	0.249244078	0.359401204	0.472378413
Taiwan		0.726067471	0.547492831	0.757631378	0.627508438	0.807463533	0.727239755	0.811790641	0.802588446				0.188676514	0.259657788	0.372879984	0.482295184
Mongolia		0.7264412	0.547978664	0.757654085	0.627540661	0.808351625	0.728400297	0.815910406	0.806297414				0.189062017	0.259689611	0.374390189	0.488347915
Djibouti		0.726514686	0.54807833	0.758323335	0.628490905	0.808364016	0.728416561	0.824761825	0.814257233				0.189141166	0.260629311	0.374411388	0.501579245
Cyprus		0.72665638	0.548271615	0.762160363	0.63400085	0.809831512	0.730341954	0.835969923	0.824725663				0.189294723	0.266126222	0.376927952	0.519502425
Israel		0.727802364	0.549872715	0.766030169	0.639696503	0.810458173	0.731218269	0.837040103	0.825733106				0.190569917	0.271895611	0.378077877	0.521259691
Former Yugoslavia		0.732696388	0.557004191	0.766207672	0.639956552	0.810471191	0.731236826	0.837052743	0.825745203				0.196319232	0.272161165	0.378102258	0.521280827
French Guiana		0.732712125	0.557027515	0.777230707	0.65631	0.810535319	0.731328834	0.842657089	0.831231422				0.196338223	0.289244256	0.378223166	0.530953835
Spain		0.741140104	0.569796646	0.778525628	0.658197	0.816892062	0.740445749	0.842948956	0.831516547				0.206921293	0.291264471	0.390361691	0.531461377
Greece		0.743307893	0.573125317	0.778539025	0.6582166	0.8263948	0.753952962	0.843109622	0.831674548				0.209741929	0.291285517	0.408937796	0.531742838
Cayman Islands		0.743311733	0.573131552	0.780501581	0.661094	0.83306973	0.763167827	0.843783204	0.832355045				0.209747237	0.294386832	0.422033931	0.532956763
Falkland Islands (Islas Malvinas)		0.743312183	0.573132297	0.784836048	0.667478111	0.83340037	0.763619133	0.844586851	0.833169379				0.209747871	0.301355022	0.422684424	0.534413069
Suriname		0.743391786	0.57326564	0.784848188	0.6674959	0.834734634	0.765450615	0.844681661	0.833266454				0.209861404	0.301374661	0.425333105	0.534586936
Antigua and Barbuda		0.743407197	0.573291602	0.784916139	0.667596	0.834885877	0.765666041	0.845878504	0.834491976				0.209883514	0.301484861	0.42564559	0.5367868
Ireland		0.744171796	0.574655248	0.786543576	0.6699958	0.834896248	0.765680953	0.854962975	0.843681234				0.21104705	0.304136782	0.425667229	0.553575804
New Zealand		0.744884496	0.575925342	0.786684556	0.670209	0.835722577	0.766876617	0.856529293	0.845265543				0.212134695	0.30437319	0.427405278	0.556524113
Korea, North		0.748794148	0.582850862	0.787024086	0.67073	0.836817615	0.768460382	0.857071604	0.845815374				0.218132583	0.304951894	0.429716929	0.557551099
Venezuela		0.752114204	0.588656	0.788100356	0.6724018	0.83939741	0.772203227	0.857691182	0.846443346				0.223248664	0.306812914	0.435223143	0.558726439
Italy		0.764805342	0.610694089	0.789561684	0.6747138	0.846808278	0.782858673	0.876280082	0.865754214				0.243426848	0.309401198	0.451238948	0.596177541
Gabon		0.764965823	0.610969068	0.800292932	0.6915068	0.846814599	0.782867999	0.877766521	0.867246866				0.243686357	0.328701756	0.451253192	0.599183241
Iceland		0.765017117	0.611063811	0.80095675	0.692522	0.847214608	0.783459489	0.878838033	0.868353923				0.243775815	0.329897412	0.452157351	0.601423309
Switzerland		0.766452618	0.613767587	0.805283419	0.699394	0.847953391	0.784576445	0.885993468	0.875659509				0.246338519	0.338079283	0.453869154	0.61644296
Austria		0.76814985	0.616939631	0.812563856	0.710732	0.849642331	0.787123209	0.886674829	0.876345373				0.249369196	0.351923756	0.457793931	0.617874699
Romania		0.773125034	0.62648086	0.814480568	0.7137719	0.857345058	0.798680917	0.898570821	0.888115921				0.258644429	0.355710282	0.475993776	0.643057123
Hungary		0.775533065	0.631067631	0.815283236	0.7150615	0.857970369	0.799607303	0.89858606	0.888130991				0.263189695	0.357326403	0.477480781	0.643090132
South Africa		0.782109287	0.6436424	0.815929169	0.716124	0.8580051	0.799658898	0.899476369	0.889023338				0.275945302	0.358662662	0.477563726	0.645048322
Japan		0.808369427	0.69034953	0.839304779	0.752788	0.867730769	0.813801299	0.899486317	0.889033438				0.327342837	0.40730715	0.500812288	0.645070525
Norway		0.809287939	0.691900346	0.840987697	0.7553118	0.888579234	0.842105731	0.900252006	0.889821228				0.329164765	0.410846985	0.550659807	0.646805306
France		0.821689497	0.71376365	0.84820061	0.7661548	0.890315698	0.844373587	0.902741347	0.892379615				0.355699892	0.426355341	0.554862249	0.652478151
Puerto Rico		0.822411077	0.71501438	0.848232569	0.7662048	0.891165683	0.845489308	0.903461263	0.893120256				0.357267213	0.426427965	0.556941829	0.654131702
Trinidad and Tobago		0.822656241	0.715470566	0.848280766	0.76628	0.891175183	0.845501841	0.903506272	0.893166662				0.357840236	0.426537633	0.556965235	0.654235477
Bermuda		0.822668545	0.715493481	0.848292693	0.766299	0.891184539	0.845514305	0.903513588	0.893174557				0.357869039	0.426565235	0.556988514	0.654253136
Sweden		0.824536871	0.719029238	0.849068195	0.7676519	0.89219009	0.846851378	0.90352646	0.893188488				0.362335545	0.428535561	0.559491506	0.654284293
Bulgaria		0.826525037	0.722795173	0.849073183	0.7676606	0.892190558	0.846852011	0.903534858	0.89319769				0.367141769	0.428548309	0.559492693	0.654304876
Libya		0.82721307	0.72416493	0.859936376	0.786292	0.916373834	0.878158074	0.924301718	0.915393524				0.368902554	0.456510032	0.621677072	0.706437148
United Kingdom		0.839873352	0.749116298	0.860879902	0.787891	0.917251582	0.879229977	0.924346949	0.915439829				0.402202898	0.458983172	0.623938189	0.706551523
Finland		0.840947869	0.751281615	0.872825554	0.808163	0.930766827	0.895762611	0.924383718	0.915477777				0.405206396	0.491419858	0.659398077	0.706645274
Former U.S.S.R.		0.900747285	0.85368549	0.873798319	0.809766	0.930781628	0.89578015	0.931470229	0.922810994				0.572469471	0.494073151	0.659437814	0.72509149
Poland		0.90874579	0.865541102	0.873809252	0.8097847	0.931410195	0.896523945	0.934839884	0.926334535				0.595749765	0.494103695	0.661125727	0.73419871
Singapore		0.909288473	0.86633554	0.873855635	0.809868	0.931456413	0.896581886	0.935872889	0.927449431				0.597346153	0.494242574	0.66125744	0.737115085
Germany, West		0.923128341	0.886051017	0.873864566	0.8098845	0.9351047	0.901209774	0.937391642	0.929090886				0.638553319	0.494269406	0.67188419	0.741440105
New Caledonia		0.923159681	0.886093997	0.875750948	0.813371	0.935158196	0.901277639	0.93739879	0.929099666				0.638646679	0.500089737	0.672041615	0.741463341
American Samoa		0.923166969	0.886104048	0.875751326	0.8133718	0.935385113	0.901568543	0.937399656	0.929100734				0.638668515	0.500090907	0.672716956	0.741466166
Denmark		0.924318708	0.887721758	0.878697867	0.8187604	0.935386167	0.901569906	0.937587785	0.929332661				0.642194484	0.509215038	0.672720121	0.74208034
Australia		0.927604594	#REF!	0.881736867	0.824368	0.935432639	0.901632428	0.937588243	0.929333232				0.652985901	0.518880179	0.672865381	0.742081853
Former Czechoslovakia		0.931034089	#REF!	0.882140122	0.825108	0.938937417	0.906761496	0.940003132	0.932361672				0.664308429	0.520169009	0.684919913	0.750172392
Belgium		0.933247806	#REF!	0.936846342	0.9118224	0.938938067	0.906762439	0.944922089	0.938690404				0.671672994	0.697691752	0.684922154	0.767525116
Netherlands		0.93643014	#REF!	0.936871722	0.9118575	0.940625937	0.909332146	0.944922835	0.938691351				0.682587191	0.69777704	0.691066972	0.767527758
Nauru		0.936431874	#REF!	0.939703547	0.915858	0.940633467	0.909343769	0.945355247	0.939290031				0.682594041	0.707585796	0.69109493	0.769202107
Gibraltar		0.936438355	#REF!	0.939941053	0.916199	0.943253212	0.913550199	0.949104492	0.944518117				0.682620571	0.708430712	0.701312608	0.784081227
Saudi Arabia		0.938691352	#REF!	0.943149493	0.9211536	0.943254834	0.913552959	0.994175404	0.993942835				0.692222722	0.72086389	0.701319379	0.963011842
Germany, East		0.942454096	#REF!	0.943151289	0.921156	0.94836921	0.923028665	0.994176754	0.993943963				0.708330457	0.720871104	0.725104578	0.963017603
Canada		0.94798306	#REF!	0.948409796	0.9295796	0.948394752	0.923075024	0.994236023	0.993993678				0.733157681	0.742735315	0.725223708	0.963271686
Bahamas, The		0.948030218	#REF!	0.951484413	0.9346315	0.951528082	0.928743774	0.997370972	1				0.733374235	0.756325045	0.740007122	0.976721708
United States		0.999113938	1	0.951532265	0.934709	0.95160024	0.928885153	0.997428529	1				0.992573231	0.756536902	0.740381453	0.976989924
Bahrain		0.999192077	1	0.952108834	0.935689	0.99800233	1	0.997501023	1				0.992994345	0.759219255	0.983649194	0.977375774
Kuwait		0.999500023	1	0.999342184	1	0.998208187	1	0.997672967	1				0.994699157	0.993402632	0.984790615	0.978346941
Saint Pierre and Miquelon		0.99950137	1	0.999414649	1	0.998876409	1	0.998043519	1				0.994707141	0.993900711	0.989256798	0.981092476
Brunei		0.99954301	1	0.999510332	1	0.999200751	1	0.998294054	1				0.994991288	0.99456462	0.991725405	0.983258553
United Arab Emirates		0.999767891	1	0.999511528	1	0.999308444	1	0.99847308	1				0.996636402	0.994576742	0.992566199	0.984918747
Luxembourg		0.999849814	1	0.999857089	1	0.999837863	1	0.999198048	1				0.997268243	0.998250946	0.99736754	0.991725017
Guam		0.99987384	1	0.999939098	1	0.999943096	1	0.999946987	1				0.997460573	0.999123365	0.99880718	0.998982141
Qatar		0.999925343	1	0.999974821	1	0.999977661	1	0.999980308	1				0.998212984	0.999576102	0.999289186	0.99934894
Netherlands Antilles		0.999977599	1	0.999980329	1	0.999995527	1	0.999995792	1				0.999080641	0.999653759	0.99969729	0.999842994
Virgin Islands, U.S.		1	1	1	1	1.000000011	1	1	1				1	1	1	1
				5284.88456				6863.18955
