# Supplementary material
Source: MDPI journal article supplement (https://www.mdpi.com/1099-4300/15/12/5565)
Supplement: s2 [file s2 › Sources/Figure 7/README.txt]

Figure 7a and 7b are plotted by Qin Liu (qinliu.christoph@gmail.com).

Comments on .csv files:
- Global_pop.csv contains population data for all countries, which is same with Population_(Millions).xls in /Raw Data but has deleted data for regions and replaced all 'NA' by 0s.
- TotalCO2.csv contains CO_2 emission data for all countries, which is same with Total_Carbon_Dioxide_Emission_from_Energy_Consumption_(Metric_Tons).xls in /Raw Data but has deleted data for regions and replaced all 'NA' by 0s.
- cepercap.csv contains CO_2 per capita data for all countries, which is calculated using Global_pop and TotalCO2. Emission Per Capita for A=(Emission of A)/(Population of A).
- Figure_7b.csv contains empirical population data and theoretical population data. Theoretical population data are calculated using OpenLu calculator (Download url:http://www.forcal.net/xiazai/lu1/openlu32.rar) by solving equation y=x+(1-x)*ln(1-x), given y (cumulative CO_2 emission).
