# Supplementary material
Source: MDPI journal article supplement (https://www.mdpi.com/1099-4300/15/12/5565)
Supplement: s2 [file s2 › Sources/Figure 8/Figure 8.csv]

	Coal	Natural Gas	Petroleum
1980	0.676568653740395	0.681285833203324	0.80907868096815
1981	0.671046930032414	0.679426401341385	0.807550464775138
1982	0.665235901130694	0.675214324905273	0.805386807883341
1983	0.663914325160369	0.673327733003324	0.79910849750996
1984	0.666565653092828	0.667442093664517	0.797170764124597
1985	0.663789228909436	0.666599792736701	0.794777720494276
1986	0.665560132825702	0.663324088881609	0.794599170870417
1987	0.664276955620919	0.662414477284603	0.794096044922236
1988	0.663439289594375	0.660845109007663	0.793930734987843
1989	0.660071958059409	0.654953628200888	0.792961827824827
1990	0.65983352205754	0.65059571244265	0.791101361679371
1991	0.657569229897649	0.629596799972946	0.787970690010815
1992	0.659666685495956	0.63667124535855	0.795675187024809
1993	0.677875456981218	0.631164782345831	0.793430580445026
1994	0.656801484636759	0.620966170963819	0.788113830958418
1995	0.650519408671857	0.614965411319239	0.784554766800667
1996	0.650239935862133	0.616394752865176	0.778223595792236
1997	0.647076102932152	0.614831633371875	0.774432221715211
1998	0.644911975315635	0.613014726152748	0.773079926513045
1999	0.643283583355507	0.611891779816197	0.769997410404609
2000	0.639587962707605	0.614586251267288	0.76915169977527
2001	0.637539684794609	0.610680428726094	0.76626006143636
2002	0.634154316656932	0.610181258887757	0.763613239229651
2003	0.634322432769903	0.608457255973653	0.761116008767344
2004	0.630951375018678	0.600604004492931	0.757640388647418
2005	0.627290439858763	0.597772085686306	0.749607270457505
2006	0.619831351611389	0.594681592521584	0.742958874076644
2007	0.617570499842898	0.593341143909713	0.739080804538403
2008	0.609524959308943	0.593457940761623	0.736595410769725
2009	0.598049063283327	0.592352868934901	0.727825740020742
2010	0.596073563745876	0.595528198686765	0.721020697233268
