# Supplementary material
Source: MDPI journal article supplement (https://www.mdpi.com/1099-4300/15/12/5565)
Supplement: s2 [file s2 › Sources/lib/eia.r]

# These are not countries or lack good data, and so are excluded from analysis.
exclude <- c("North America",
	     "Central & South America",
	     "Asia & Oceania",
	     "Europe",
	     "Eurasia",
	     "Africa",
	     "Middle East",
	     "Antarctica",
	     "World")

# Read in an eia data set, excluding exclusions listed above, and the year
# 2011 (which does not yet have good data available).
read.eia <- function (n) {
	raw <- read.csv(n)
	rownames(raw) <- raw$Region
	return(raw[!(raw$Region %in% exclude),][!(names(raw) %in% c("Region", "X2011"))])
}
