# Supplementary material
Source: MDPI journal article supplement (https://www.mdpi.com/1099-4300/15/12/5565)
Supplement: s2 [file s2 › Sources/lib/util.r]

# Functions to return the first and second elements of a vector.
fst <- function (v) v[1]
snd <- function (v) v[2]
