# Supplementary material
Source: MDPI journal article supplement (https://www.mdpi.com/1099-4300/15/12/5565)
Supplement: s2 [file s2 › Sources/Movies/ffmpeg toolbox/ffmpegpath.m]

function ffmpegexe = ffmpegpath
%FFMPEGPAT   Returns the FFMPEG exe path

% Copyright 2013 Takeshi Ikuma
% History:
% rev. - : (05-15-2013) original release


if ispref('ffmpeg','exepath')
   ffmpegexe = getpref('ffmpeg','exepath');
else
   error('FFMPEG path not set. Run ffmpegsetup first.');
end
