# Supplementary material
Source: MDPI journal article supplement (https://www.mdpi.com/1099-4300/15/12/5565)
Supplement: s2 [file s2 › Sources/Movies/README.txt]

Movies are made by Qin Liu (qinliu.christoph@gmail.com).
ffmpeg toolbox will be needed when making high resolution movies inside Matlab. Detailed instructions can be found in ffmpegsetup.m.
ffmpeg toolbox download url: http://www.mathworks.com/matlabcentral/fileexchange/42296-ffmpeg-toolbox.

Comments on .csv files:
- Global_pop.csv contains population data for all countries, which is same with Population_(Millions).xls in /Raw Data but has deleted data for regions and replaced all 'NA' by 0s.
- TotalCO2.csv contains CO_2 emission data for all countries, which is same with Total_Carbon_Dioxide_Emission_from_Energy_Consumption_(Metric_Tons).xls in /Raw Data but has deleted data for regions and replaced all 'NA' by 0s.
- cepercap.csv contains CO_2 per capita data for all countries, which is calculated using Global_pop and TotalCO2. Emission Per Capita for A=(Emission of A)/(Population of A).
- Global_ectot.csv contains energy consumption data for all countries, which is same with Total_Primary_Consumption_(Quadrillion_Btu).xls in /Raw Data but has deleted data for regions and replaced all 'NA' by 0s.
- Global_ecpercap.csv contains energy consumption per capita data for all countries, which is calculated using Global_pop and Global_ectot. Consumption Per Capita for A=(Energy Consumption of A)/(Population of A).
