# Supplementary material
Source: MDPI journal article supplement (https://www.mdpi.com/1099-4300/15/12/5565)
Supplement: s2 [file s2 › Sources/Raw Data/Dry_Natural_Gas_Consumption_(Quadrillion_Btu).xls]

## Sheet: Data3
Table: Dry Natural Gas Consumption (Quadrillion Btu)
		1980	1981	1982	1983	1984	1985	1986	1987	1988	1989	1990	1991	1992	1993	1994	1995	1996	1997	1998	1999	2000	2001	2002	2003	2004	2005	2006	2007	2008	2009	2010	2011
North America		22.9939	22.5228	21.25	20.1153	21.4469	20.9484	19.6761	20.722	21.7716	22.9873	23.033	23.5285	24.4178	25.0499	25.7016	26.7644	27.2995	27.4347	27.0582	27.4249	28.3433	27.4487	28.3631	28.0063	28.0372	27.7605	27.9359	28.9427	29.1003	28.7213	29.9643	30.8757
Bermuda		0	0	0	0	0	0	0	0	0	0	0	0	0	0	0	0	0	0	0	0	0	0	0	0	0	0	0	0	0	0	0	0
Canada		1.91491	1.86417	1.90217	1.90034	2.05577	2.20417	2.16031	2.14368	2.37063	2.46086	2.41091	2.43649	2.63982	2.73646	2.83341	2.9328	2.98429	2.95366	2.86465	3.17902	3.05118	3.19009	3.24322	3.45726	3.4245	3.49574	3.41591	3.2024	3.09189	3.15807	3.01182	3.27108
Greenland		0	0	0	0	0	0	0	0	0	0	0	0	0	0	0	0	0	0	0	0	0	0	0	0	0	0	0	0	0	0	0	0
Mexico		0.84352	0.91133	0.99157	0.99417	0.99753	1.04073	0.92441	0.93855	0.95259	0.92472	1.01898	1.05908	1.06431	1.0845	1.14013	1.16046	1.23059	1.25833	1.36329	1.33666	1.4681	1.48603	1.60983	1.71842	1.68968	1.69941	2.28124	2.07754	2.16548	2.14732	2.37778	2.74496
Saint Pierre and Miquelon		0	0	0	0	0	0	0	0	0	0	0	0	0	0	0	0	0	0	0	0	0	0	0	0	0	0	0	0	0	0	0	0
United States		20.2355	19.7473	18.3562	17.2208	18.3936	17.7035	16.5914	17.6398	18.4484	19.6017	19.6032	20.033	20.7136	21.2289	21.7281	22.6711	23.0846	23.2227	22.8302	22.9092	23.824	22.7726	23.5101	22.8306	22.9231	22.5654	22.2387	23.6628	23.8429	23.4159	24.5748	24.8596
Central & South America		1.38977	1.48129	1.58054	1.57959	1.88437	1.94045	1.97207	1.88586	2.01877	2.30458	2.20169	2.35601	2.33762	2.49707	2.65086	2.80192	3.00298	3.17318	3.39571	3.32456	3.56844	3.83434	3.7813	3.95009	4.38013	4.51973	4.85124	4.68869	4.98328	4.68082	5.48566	5.57816
Antarctica		0	0	0	0	0	0	0	0	0	0	0	0	0	0	0	0	0	0	0	0	0	0	0	0	0	0	0	0	0	0	0	0
Antigua and Barbuda		0	0	0	0	0	0	0	0	0	0	0	0	0	0	0	0	0	0	0	0	0	0	0	0	0	0	0	0	0	0	0	0
Argentina		0.36833	0.37141	0.46786	0.46067	0.58687	0.59303	0.64125	0.62042	0.73155	0.82176	0.73517	0.81595	0.82259	0.87057	0.89493	0.99604	1.05583	1.05325	1.12595	1.19422	1.22559	1.15215	1.11709	1.27615	1.39904	1.4924	1.54112	1.62083	1.63891	1.59205	1.59758	1.70276
Aruba		--	--	--	--	--	--	0	0	0	0	0	0	0	0	0	0	0	0	0	0	0	0	0	0	0	0	0	0	0	0	0	0
Bahamas, The		0	0	0	0	0	0	0	0	0	0	0	0	0	0	0	0	0	0	0	0	0	0	0	0	0	0	0	0	0	0	0	0
Barbados		0.00037	0.00037	0.00037	0.00042	0.00042	0.00042	0.00042	0.00037	0.00097	0.00105	0.00105	0.00083	0.0008	0.00112	0.00082	0.00097	0.00108	0.00108	0.00108	0.00108	0.00108	0.00108	0.00108	0.00108	0.00108	0.00108	0.00108	0.00104	0.00118	0.00074	0.00074	0
Belize		0	0	0	0	0	0	0	0	0	0	0	0	0	0	0	0	0	0	0	0	0	0	0	0	0	0	0	0	0	0	0	0
Bolivia		0.01306	0.01959	0.012	0.015	0.014	0.011	0.014	0.01367	0.01942	0.02614	0.03	0.026	0.032	0.03002	0.03496	0.045	0.03875	0.04945	0.03211	0.03321	0.0465	0.03026	0.03764	0.08267	0.07897	0.07787	0.08857	0.09263	0.10595	0.10444	0.10038	0.09115
Brazil		0.05662	0.05662	0.05092	0.0631	0.08192	0.10184	0.09963	0.11602	0.1079	0.13565	0.11398	0.13966	0.15299	0.15184	0.15829	0.16564	0.18547	0.20274	0.21302	0.2402	0.34671	0.41208	0.49178	0.51933	0.63245	0.69533	0.72261	0.74203	0.88364	0.69944	0.94155	0.93632
Cayman Islands		0	0	0	0	0	0	0	0	0	0	0	0	0	0	0	0	0	0	0	0	0	0	0	0	0	0	0	0	0	0	0	0
Chile		0.085	0.085	0.049	0.046	0.048	0.044	0.026	0.02578	0.03532	0.05686	0.066	0.052	0.05444	0.0618	0.06851	0.0671	0.06712	0.10383	0.11977	0.1702	0.19319	0.23509	0.23857	0.29303	0.30711	0.31637	0.27858	0.16458	0.10195	0.12024	0.19638	0.20834
Colombia		0.1188	0.1272	0.1272	0.1224	0.1716	0.1728	0.1728	0.13006	0.13582	0.13549	0.14028	0.144	0.14009	0.14585	0.15092	0.14927	0.15551	0.19586	0.20538	0.16994	0.187	0.1998	0.2021	0.1998	0.20275	0.21883	0.23687	0.24737	0.24606	0.2851	0.29789	0.29002
Costa Rica		0	0	0	0	0	0	0	0	0	0	0	0	0	0	0	0	0	0	0	0	0	0	0	0	0	0	0	0	0	0	0	0
Cuba		0.00062	0.00032	0.00032	0.00028	0.00013	0.00025	0.00021	0.00082	0.00074	0.00115	0.00119	0.00124	0.00128	0.00131	0.00128	0.00152	0.00159	0.02773	0.01479	0.01849	0.02218	0.01109	0.01294	0.01368	0.01368	0.01479	0.01479	0.02218	0.04289	0.04289	0.03956	0.03808
Dominica		0	0	0	0	0	0	0	0	0	0	0	0	0	0	0	0	0	0	0	0	0	0	0	0	0	0	0	0	0	0	0	0
Dominican Republic		0	0	0	0	0	0	0	0	0	0	0	0	0	0	0	0	0	0	0	0	0	0	0	0.01109	0.00481	0.00924	0.00924	0.01775	0.01738	0.02071	0.03032	0.03439
Ecuador		0.0039	0.0026	0.0026	0.0039	0.0052	0.0052	0.0039	0.00252	0.00367	0.00367	0.0052	0.00419	0.00459	0.00459	0.00459	0.00551	0.00551	0.00459	0.00459	0.00459	0.00643	0.00735	0.00459	0.00689	0.0078	0.01194	0.01285	0.01263	0.01194	0.01359	0.01515	0.01102
El Salvador		0	0	0	0	0	0	0	0	0	0	0	0	0	0	0	0	0	0	0	0	0	0	0	0	0	0	0	0	0	0	0	0
Falkland Islands (Islas Malvinas)		0	0	0	0	0	0	0	0	0	0	0	0	0	0	0	0	0	0	0	0	0	0	0	0	0	0	0	0	0	0	0	0
French Guiana		0	0	0	0	0	0	0	0	0	0	0	0	0	0	0	0	0	0	0	0	0	0	0	0	0	0	0	0	0	0	0	0
Grenada		0	0	0	0	0	0	0	0	0	0	0	0	0	0	0	0	0	0	0	0	0	0	0	0	0	0	0	0	0	0	0	0
Guadeloupe		0	0	0	0	0	0	0	0	0	0	0	0	0	0	0	0	0	0	0	0	0	0	0	0	0	0	0	0	0	0	0	0
Guatemala		0	0	0	0	0	0	0	0	0	0	0	0	0	0	0	0	0	0	0	0	0	0	0	0	0	0	0	0	0	0	0	0
Guyana		0	0	0	0	0	0	0	0	0	0	0	0	0	0	0	0	0	0	0	0	0	0	0	0	0	0	0	0	0	0	0	0
Haiti		0	0	0	0	0	0	0	0	0	0	0	0	0	0	0	0	0	0	0	0	0	0	0	0	0	0	0	0	0	0	0	0
Honduras		0	0	0	0	0	0	0	0	0	0	0	0	0	0	0	0	0	0	0	0	0	0	0	0	0	0	0	0	0	0	0	0
Jamaica		0	0	0	0	0	0	0	0	0	0	0	0	0	0	0	0	0	0	0	0	0	0	0	0	0	0	0	0	0	0	0	0
Martinique		0	0	0	0	0	0	0	0	0	0	0	0	0	0	0	0	0	0	0	0	0	0	0	0	0	0	0	0	0	0	0	0
Montserrat		0	0	0	0	0	0	0	0	0	0	0	0	0	0	0	0	0	0	0	0	0	0	0	0	0	0	0	0	0	0	0	0
Netherlands Antilles		0	0	0	0	0	0	0	0	0	0	0	0	0	0	0	0	0	0	0	0	0	0	0	0	0	0	0	0	0	0	0	0
Nicaragua		0	0	0	0	0	0	0	0	0	0	0	0	0	0	0	0	0	0	0	0	0	0	0	0	0	0	0	0	0	0	0	0
Panama		0	0	0	0	0	0	0	0	0	0	0	0	0	0	0	0	0	0	0	0	0	0	0	0	0	0	0	0	0	0	0	0
Paraguay		0	0	0	0	0	0	0	0	0	0	0	0	0	0	0	0	0	0	0	0	0	0	0	0	0	0	0	0	0	0	0	0
Peru		0.04268	0.05228	0.04908	0.04908	0.04908	0.05015	0.05228	0.04396	0.04101	0.03774	0.01765	0.01706	0.0166	0.03149	0.03215	0.03051	0.03182	0.00787	0.01345	0.01345	0.01115	0.01214	0.01444	0.01706	0.03663	0.06729	0.07581	0.11372	0.15545	0.14779	0.23382	0.24319
Puerto Rico		0	0	0	0	0	0	0	0	0	0	0	0	0	0	0	0	0	0	0	0	0.01294	0.02329	0.02329	0.02736	0.02514	0.02477	0.02662	0.02722	0.02982	0.02798	0.02847	0.02773
Saint Kitts and Nevis		0	0	0	0	0	0	0	0	0	0	0	0	0	0	0	0	0	0	0	0	0	0	0	0	0	0	0	0	0	0	0	0
Saint Lucia		0	0	0	0	0	0	0	0	0	0	0	0	0	0	0	0	0	0	0	0	0	0	0	0	0	0	0	0	0	0	0	0
Saint Vincent/Grenadines		0	0	0	0	0	0	0	0	0	0	0	0	0	0	0	0	0	0	0	0	0	0	0	0	0	0	0	0	0	0	0	0
Suriname		0	0	0	0	0	0	0	0	0	0	0	0	0	0	0	0	0	0	0	0	0	0	0	0	0	0	0	0	0	0	0	0
Trinidad and Tobago		0.08465	0.08465	0.10659	0.13272	0.20064	0.22572	0.15884	0.14976	0.1609	0.16976	0.18497	0.21005	0.20297	0.22781	0.26092	0.2801	0.31627	0.34321	0.34321	0.35207	0.37015	0.4148	0.44211	0.47348	0.52219	0.60043	0.7451	0.74731	0.80968	0.77351	0.86061	0.84732
Turks and Caicos Islands		0	0	0	0	0	0	0	0	0	0	0	0	0	0	0	0	0	0	0	0	0	0	0	0	0	0	0	0	0	0	0	0
Uruguay		0	0	0	0	0	0	0	0	0	0	0	0	0	0	0	0	0	0	0	0.00074	0.00148	0.00148	0.00074	0.00222	0.00444	0.00333	0.00444	0.00333	0.00259	0.00148	0.00296	0.00296
Venezuela		0.61575	0.68125	0.7146	0.68602	0.72651	0.73604	0.80273	0.78249	0.78147	0.91531	0.90621	0.94503	0.90926	0.97067	1.04351	1.06025	1.14404	1.18357	1.32237	1.12637	1.14404	1.33373	1.19493	1.02627	1.14404	0.98606	1.09356	0.87607	0.93584	0.85088	1.14025	1.14488
Virgin Islands, U.S.		0	0	0	0	0	0	0	0	0	0	0	0	0	0	0	0	0	0	0	0	0	0	0	0	0	0	0	0	0	0	0	0
Virgin Islands, British		0	0	0	0	0	0	0	0	0	0	0	0	0	0	0	0	0	0	0	0	0	0	0	0	0	0	0	0	0	0	0	0
Europe		10.6428	10.5141	10.5533	10.7876	11.3393	11.669	12.0108	12.5675	12.2934	12.9281	13.0277	13.5808	13.2648	13.8274	13.9581	15.3456	16.5494	16.2965	16.6121	17.327	17.7701	18.3628	18.5846	19.6343	20.3311	20.692	20.6554	20.5606	21.008	19.8476	20.9346	19.4661
Albania		0.01047	0.01109	0.01047	0.0111	0.01131	0.01047	0.01466	0.01665	0.02589	0.02589	0.00943	0.00522	0.00376	0.00111	0.00111	0.00111	0.00111	0.00074	0.00111	0.00074	0.00111	0.00111	0.00111	0.00111	0.00111	0.00111	0.00111	0.00037	0.00111	0.00111	0.00037	0.00037
Austria		0.18487	0.17273	0.16718	0.17055	0.18904	0.20285	0.19638	0.20516	0.1954	0.20943	0.23091	0.24168	0.23733	0.25032	0.25764	0.27855	0.29923	0.28838	0.29608	0.30107	0.2726	0.28868	0.29194	0.31567	0.31534	0.34193	0.31153	0.31843	0.33646	0.32967	0.36223	0.34297
Belgium		0.39502	0.36335	0.29983	0.31623	0.32623	0.32559	0.29009	0.32345	0.318	0.35376	0.36275	0.38512	0.39691	0.41654	0.42589	0.47116	0.5247	0.50052	0.55122	0.58687	0.58985	0.58232	0.60015	0.63938	0.65156	0.64051	0.65927	0.6642	0.65969	0.66616	0.74521	0.63494
Bosnia and Herzegovina		--	--	--	--	--	--	--	--	--	--	--	--	0.01754	0.01405	0.01451	0.08583	0.0049	0.0049	0.00701	0.00701	0.01051	0.01051	0.00561	0.00561	0.01051	0.01435	0.01435	0.01148	0.01112	0.00753	0.00825	0.00825
Bulgaria		0.16992	0.1567	0.16992	0.1737	0.17086	0.20674	0.21218	0.21062	0.20847	0.21013	0.22726	0.198	0.18414	0.17026	0.16642	0.20607	0.21707	0.18043	0.13409	0.11865	0.19224	0.20435	0.16723	0.18963	0.18627	0.19337	0.20053	0.11996	0.11495	0.07413	0.09096	0.10922
Croatia		--	--	--	--	--	--	--	--	--	--	--	--	0.10053	0.10863	0.0954	0.08578	0.09244	0.10353	0.09872	0.09835	0.10242	0.10501	0.09474	0.10954	0.09867	0.09642	0.09786	0.0999	0.10628	0.0961	0.10176	0.10295
Cyprus		0	0	0	0	0	0	0	0	0	0	0	0	0	0	0	0	0	0	0	0	0	0	0	0	0	0	0	0	0	0	0	0
Czech Republic		--	--	--	--	--	--	--	--	--	--	--	--	--	0.26141	0.241	0.28869	0.33238	0.33721	0.33769	0.3405	0.33041	0.35398	0.34239	0.34585	0.34347	0.33927	0.33373	0.31131	0.31261	0.29538	0.33559	0.32344
Denmark		0	0	0	0.00222	0.00741	0.02931	0.04955	0.06346	0.07016	0.07485	0.0795	0.08954	0.09421	0.1068	0.1184	0.13961	0.1621	0.18508	0.19095	0.2021	0.20643	0.20412	0.20404	0.20649	0.20554	0.19743	0.20118	0.17968	0.18117	0.17365	0.19664	0.16485
Faroe Islands		0	0	0	0	0	0	0	0	0	0	0	0	0	0	0	0	0	0	0	0	0	0	0	0	0	0	0	0	0	0	0	0
Finland		0.03251	0.02685	0.02409	0.02351	0.02803	0.0357	0.04377	0.058	0.06215	0.08187	0.09643	0.1015	0.10542	0.10911	0.12094	0.12496	0.1308	0.12861	0.14711	0.14711	0.15051	0.16313	0.16234	0.17962	0.17349	0.15897	0.17073	0.16395	0.1698	0.15362	0.16913	0.14819
Former Czechoslovakia		0.33508	0.3367	0.35328	0.35846	0.3771	0.39927	0.41889	0.4463	0.41851	0.45331	0.53519	0.4909	0.40031	--	--	--	--	--	--	--	--	--	--	--	--	--	--	--	--	--	--	--
Former Serbia and Montenegro		--	--	--	--	--	--	--	--	--	--	--	--	0.07491	0.03557	0.06028	0.04085	0.10283	0.10175	0.10871	0.06393	0.02008	0.02226	0.08467	0.08134	0.08652	0.08874	--	--	--	--	--	--
Former Yugoslavia		0.14249	0.16485	0.16275	0.15809	0.208	0.22069	0.23766	0.27866	0.27353	0.30462	0.26313	0.26207	--	--	--	--	--	--	--	--	--	--	--	--	--	--	--	--	--	--	--	--
France		0.9301	0.96246	0.931	0.97381	1.03164	1.0634	1.07456	1.08991	1.05268	1.07038	1.08773	1.23192	1.24621	1.25571	1.24951	1.27498	1.40763	1.39625	1.42975	1.50156	1.57677	1.65326	1.69464	1.66336	1.76562	1.88129	1.92473	1.79043	1.87709	1.79536	1.83204	1.87212
Germany		--	--	--	--	--	--	--	--	--	--	--	2.47897	2.44633	2.53269	2.65375	3.05739	3.06153	2.93357	3.04852	3.07851	3.04235	3.1811	3.15959	3.52304	3.49017	3.43319	3.48127	3.37001	3.44792	3.29233	3.26985	2.82529
Germany, East		0.19227	0.19422	0.1911	0.19344	0.22932	0.2262	0.23478	0.21645	0.23478	0.22932	0.13923	--	--	--	--	--	--	--	--	--	--	--	--	--	--	--	--	--	--	--	--	--
Germany, West		1.88966	1.78932	1.63747	1.68809	1.77245	1.74581	1.76978	1.93406	1.87723	1.99534	2.05297	--	--	--	--	--	--	--	--	--	--	--	--	--	--	--	--	--	--	--	--	--
Gibraltar		0	0	0	0	0	0	0	0	0	0	0	0	0	0	0	0	0	0	0	0	0	0	0	0	0	0	0	0	0	0	0	0
Greece		0	0	0.0032	0.00305	0.00335	0.00288	0.00431	0.00432	0.00577	0.00577	0.00561	0.00588	0.00578	0.00411	0.00209	0.00189	0.00215	0.00755	0.03199	0.05377	0.07515	0.07423	0.07947	0.08936	0.09848	0.10388	0.12106	0.14702	0.15574	0.12957	0.14249	0.17615
Hungary		0.35132	0.35924	0.37523	0.374	0.38079	0.38864	0.41231	0.40935	0.40507	0.41276	0.39203	0.38946	0.34194	0.36823	0.37198	0.40466	0.45117	0.42826	0.43097	0.43667	0.42456	0.47213	0.47345	0.5199	0.51241	0.53336	0.50656	0.47177	0.46597	0.40339	0.43273	0.41222
Iceland		0	0	0	0	0	0	0	0	0	0	0	0	0	0	0	0	0	0	0	0	0	0	0	0	0	0	0	0	0	0	0	0
Ireland		0.03232	0.04949	0.07373	0.07784	0.08274	0.08752	0.05935	0.05954	0.07169	0.0808	0.08266	0.08476	0.08374	0.09504	0.09671	0.10299	0.11681	0.12228	0.12363	0.13212	0.1515	0.15796	0.16143	0.16218	0.16559	0.15725	0.17819	0.19211	0.19548	0.18948	0.20728	0.18304
Italy		0.99437	0.96416	0.96041	0.98752	1.16322	1.18206	1.24952	1.38765	1.50408	1.62392	1.72255	1.83003	1.81312	1.84962	1.78659	1.96863	2.03176	2.09466	2.25524	2.4512	2.55582	2.56283	2.54545	2.8064	2.91218	3.11652	3.05214	3.06709	3.06659	2.81879	3.00207	2.81493
Luxembourg		0.01886	0.01434	0.01207	0.01145	0.01203	0.01309	0.01297	0.01511	0.0162	0.01834	0.0185	0.01969	0.02053	0.02133	0.02152	0.02457	0.02695	0.02763	0.0279	0.02892	0.02949	0.03062	0.04639	0.04694	0.05287	0.05197	0.05425	0.05064	0.04822	0.04907	0.05275	0.0455
Macedonia		--	--	--	--	--	--	--	--	--	--	--	--	0.00948	0.01048	0	0	0	0	0.00071	0.00143	0	0	0	0	0.00358	0.00357	0.00357	0.00285	0.0025	0.00285	0.00357	0
Malta		0	0	0	0	0	0	0	0	0	0	0	0	0	0	0	0	0	0	0	0	0	0	0	0	0	0	0	0	0	0	0	0
Montenegro		--	--	--	--	--	--	--	--	--	--	--	--	--	--	--	--	--	--	--	--	--	--	--	--	--	--	0	0	0	0	0	0
Netherlands		1.33474	1.27037	1.35083	1.29854	1.37712	1.45223	1.44828	1.49477	1.35262	1.3857	1.37229	1.53321	1.49201	1.53214	1.47901	1.52065	1.67519	1.57599	1.56617	1.52428	1.54253	1.58126	1.57987	1.58679	1.61921	1.55661	1.51274	1.47089	1.53379	1.54748	1.73361	1.51356
Norway		0.03832	0.03749	0.04176	0.04979	0.04416	0.05201	0.09377	0.06538	0.07602	0.07932	0.08728	0.08486	0.14274	0.09896	0.10338	0.11371	0.11327	0.14178	0.13794	0.16775	0.15198	0.1755	0.20519	0.23924	0.30389	0.20102	0.12772	0.16624	0.13101	0.2456	0.20708	0.15504
Poland		0.3733	0.36143	0.35474	0.36067	0.37501	0.38128	0.41101	0.4242	0.42481	0.41735	0.38985	0.34952	0.3421	0.35918	0.3678	0.3851	0.43292	0.43378	0.43031	0.40847	0.44048	0.4507	0.44129	0.48541	0.51933	0.53995	0.54287	0.54098	0.54645	0.53194	0.5719	0.56577
Portugal		0	0	0	0	0	0	0	0	0	0	0	0	0	0	0	0	0	0.0038	0.03048	0.08518	0.08913	0.09888	0.12038	0.11624	0.14566	0.16541	0.16038	0.16675	0.18102	0.18232	0.19797	0.19887
Romania		1.33857	1.35569	1.50977	1.54722	1.49265	1.42952	1.5087	1.50366	1.39699	1.48125	1.34927	1.04936	0.94427	0.9083	0.85074	0.90053	0.89382	0.82575	0.64655	0.61906	0.59795	0.69292	0.64239	0.63186	0.63122	0.5926	0.60628	0.55809	0.51706	0.41905	0.41905	0.44836
Serbia		--	--	--	--	--	--	--	--	--	--	--	--	--	--	--	--	--	--	--	--	--	--	--	--	--	--	0.08163	0.07808	0.07986	0.06176	0.07737	0.08412
Slovakia		--	--	--	--	--	--	--	--	--	--	--	--	--	0.22037	0.20607	0.27408	0.24222	0.24585	0.24997	0.25296	0.25478	0.27199	0.25859	0.25003	0.24254	0.26033	0.23707	0.22435	0.22789	0.19498	0.22077	0.20374
Slovenia		--	--	--	--	--	--	--	--	--	--	--	--	0.02336	0.02879	0.02777	0.03696	0.0479	0.03333	0.03496	0.03584	0.03624	0.03732	0.0348	0.03638	0.03886	0.04033	0.03965	0.04029	0.03871	0.03667	0.03803	0.03241
Spain		0.06395	0.0753	0.08136	0.08704	0.08266	0.0943	0.10005	0.1142	0.14745	0.19522	0.21888	0.24624	0.25967	0.2563	0.27303	0.34039	0.38093	0.49845	0.51173	0.58577	0.63612	0.68548	0.78374	0.88831	1.0312	1.21715	1.30595	1.40436	1.5392	1.37427	1.37519	1.2869
Sweden		0	0	0	0	0	0.00295	0.00792	0.01088	0.01282	0.01884	0.02275	0.02374	0.02699	0.02986	0.02937	0.02969	0.03074	0.03091	0.03007	0.0339	0.03121	0.03506	0.03537	0.03702	0.03549	0.03302	0.03306	0.03669	0.03135	0.04477	0.06025	0.05218
Switzerland		0.03781	0.04088	0.04354	0.04786	0.05336	0.05591	0.05723	0.06136	0.06181	0.06731	0.07197	0.08073	0.08492	0.08905	0.0878	0.0968	0.10474	0.10113	0.10413	0.10788	0.10727	0.11163	0.10958	0.11582	0.1195	0.12268	0.11928	0.11618	0.12387	0.11892	0.13289	0.11802
Turkey		0	0	0.00103	0.00258	0.00145	0.00206	0.01646	0.02675	0.0442	0.11719	0.1259	0.15382	0.16823	0.18696	0.19771	0.25518	0.30806	0.36754	0.38931	0.46189	0.548	0.58953	0.64969	0.78167	0.82507	1.00445	1.14528	1.34161	1.33812	1.27481	1.38416	1.62325
United Kingdom		1.77689	1.80746	1.79849	1.87084	1.91938	2.05849	2.08666	2.14761	2.03708	2.01538	2.08371	2.24462	2.19828	2.50645	2.65165	2.83483	3.35408	3.19687	3.25907	3.49351	3.60267	3.56496	3.60908	3.58011	3.74576	3.60531	3.43144	3.4549	3.56701	3.33686	3.56345	3.01942
Eurasia		13.8611	14.4256	15.5065	16.8052	19.1044	20.9517	22.0816	23.0463	24.7179	25.1663	25.61	25.3142	24.1978	24.0886	22.0248	20.916	19.7794	18.9414	18.8448	19.0297	19.8199	19.673	20.6667	21.5776	22.5084	22.3846	22.8617	23.1673	23.5517	19.6016	21.6647	25.4685
Armenia		--	--	--	--	--	--	--	--	--	--	--	--	0.06877	0.05176	0.05916	0.05916	0.06656	0.04807	0.05176	0.0477	0.05213	0.05176	0.0403	0.04881	0.04918	0.06286	0.06286	0.07595	0.07136	0.05731	0.06397	0.07543
Azerbaijan		--	--	--	--	--	--	--	--	--	--	--	--	0.54723	0.40673	0.34756	0.33278	0.34387	0.33869	0.20669	0.22185	0.20928	0.24847	0.32923	0.33627	0.36507	0.38123	0.41502	0.34061	0.44091	0.38186	0.36437	0.4613
Belarus		--	--	--	--	--	--	--	--	--	--	--	--	0.66981	0.62184	0.516	0.46876	0.5127	0.55299	0.56507	0.63026	0.71782	0.65919	0.62037	0.65772	0.60117	0.74342	0.76796	0.76027	0.77828	0.65003	0.79908	0.77784
Estonia		--	--	--	--	--	--	--	--	--	--	--	--	0.05276	0.02125	0.02267	0.02636	0.02885	0.03743	0.05656	0.03535	0.03967	0.04498	0.04737	0.04984	0.0509	0.0547	0.05294	0.03548	0.03404	0.0235	0.02523	0.02202
Former U.S.S.R.		13.8611	14.4256	15.5065	16.8052	19.1044	20.9517	22.0816	23.0463	24.7179	25.1663	25.61	25.3142	--	--	--	--	--	--	--	--	--	--	--	--	--	--	--	--	--	--	--	--
Georgia		--	--	--	--	--	--	--	--	--	--	--	--	0.18488	0.08874	0.05916	0.07765	0.06656	0.07025	0.06877	0.04289	0.04474	0.04289	0.05404	0.03787	0.04522	0.05495	0.05253	0.06296	0.06446	0.06371	0.06147	0.05551
Kazakhstan		--	--	--	--	--	--	--	--	--	--	--	--	0.74319	0.54723	0.55462	0.40145	0.53392	0.51765	0.49546	0.50286	0.51395	0.52874	0.55092	0.33632	0.50541	0.49909	0.54593	0.46185	0.32793	0.31872	0.3175	0.45664
Kyrgyzstan		--	--	--	--	--	--	--	--	--	--	--	--	0.08756	0.08187	0.06579	0.03253	0.06745	0.07099	0.07077	0.07062	0.07073	0.07454	0.04437	0.02725	0.03398	0.02736	0.02869	0.02841	0.02773	0.02423	0.0171	0.01479
Latvia		--	--	--	--	--	--	--	--	--	--	--	--	0.05673	0.02836	0.02482	0.03889	0.03532	0.04582	0.046	0.04565	0.05662	0.06016	0.0601	0.06357	0.06745	0.06858	0.06717	0.05833	0.04489	0.05515	0.05373	0.05585
Lithuania		--	--	--	--	--	--	--	--	--	--	--	--	0.14267	0.08561	0.08203	0.09898	0.092	0.10293	0.11403	0.07625	0.09173	0.09737	0.10196	0.1069	0.10302	0.10725	0.10266	0.12136	0.12454	0.09631	0.10972	0.11995
Moldova		--	--	--	--	--	--	--	--	--	--	--	--	0.08266	0.06764	0.0526	0.0526	0.07515	0.09018	0.0868	0.07891	0.08004	0.07703	0.08267	0.08724	0.07955	0.08531	0.09227	0.08496	0.08775	0.08113	0.07556	0.07347
Russia		--	--	--	--	--	--	--	--	--	--	--	--	16.6134	16.3143	15.3354	14.638	13.2034	12.4091	12.717	12.6956	13.1763	13.0217	13.6862	14.3322	14.9458	14.7031	15.6198	15.6227	15.9498	13.8559	15.3498	18.4427
Tajikistan		--	--	--	--	--	--	--	--	--	--	--	--	0.07025	0.05176	0.05916	0.02984	0.04541	0.04215	0.04141	0.04326	0.04622	0.04807	0.044	0.04992	0.05136	0.05151	0.04596	0.02377	0.01549	0.00818	0.00814	0.00717
Turkmenistan		--	--	--	--	--	--	--	--	--	--	--	--	0.1479	0.1516	0.15529	0.17748	0.17748	0.17008	0.16269	0.20706	0.27361	0.35496	0.42521	0.5805	0.61267	0.63615	0.64687	0.69619	0.75051	0.71656	0.72907	0.71835
Ukraine		--	--	--	--	--	--	--	--	--	--	--	--	3.61886	4.00599	3.4431	3.10958	3.07261	2.96538	2.72874	2.88403	2.90992	2.73983	2.90992	3.16504	3.19462	3.17801	2.56209	2.98121	2.94476	1.60941	2.04821	2.35435
Uzbekistan		--	--	--	--	--	--	--	--	--	--	--	--	1.11119	1.56392	1.24739	1.37196	1.45816	1.47971	1.43302	1.44739	1.53718	1.62337	1.67006	1.69811	1.80295	1.73112	1.799	1.81333	1.88915	1.65958	1.64173	1.83312
Middle East		1.37322	1.36163	1.27208	1.49705	1.99385	2.3848	2.65129	3.06968	3.436	3.75486	3.76656	3.76872	4.20387	4.47254	4.75215	4.95993	5.52249	6.12541	6.52893	6.7532	7.14447	7.38902	8.04722	8.39318	9.03441	10.2532	10.7121	11.142	12.1716	13.0232	13.8571	14.9582
Bahrain		0.1047	0.12564	0.13611	0.14658	0.13925	0.17171	0.18846	0.22668	0.19042	0.19485	0.21464	0.24395	0.19671	0.24477	0.23996	0.23996	0.24292	0.29469	0.30652	0.31096	0.31687	0.32908	0.34978	0.3557	0.3605	0.38579	0.40812	0.42433	0.44702	0.44955	0.45999	0.45459
Iran		0.24499	0.16368	0.2112	0.32736	0.50266	0.6336	0.56602	0.59664	0.74727	0.82946	0.88387	0.85642	0.93232	0.99087	1.18591	1.31269	1.49581	1.75648	1.92989	2.2301	2.34533	2.6172	2.9547	3.07291	3.19001	3.91498	4.05408	4.21556	4.44864	5.27318	5.39177	5.71845
Iraq		0.06491	0.02403	0.02513	0.01885	0.02094	0.02408	0.02827	0.03709	0.09244	0.09244	0.08062	0.04083	0.10575	0.09429	0.1172	0.11721	0.1198	0.11277	0.10908	0.11758	0.11647	0.10205	0.08726	0.04067	0.06471	0.05223	0.06484	0.05259	0.06772	0.04139	0.04683	0.0317
Israel		0.0052	0.00519	0.00312	0.00208	0.00208	0.00208	0.00145	0.00218	0.00147	0.00147	0.0011	0.0011	0.00079	0.0011	0.0011	0.00074	0.00073	0.00073	0.00073	0.00035	0.00037	0.00037	0.00035	0.00071	0.02752	0.02611	0.03474	0.04082	0.05162	0.10384	0.13161	0.11889
Jordan		0	0	0	0	0	0	0	0	0	0.00296	0.00481	0.00481	0.00555	0.00739	0.01035	0.01072	0.00998	0.01072	0.01035	0.01035	0.01072	0.01072	0.01146	0.0244	0.05213	0.05768	0.08319	0.09613	0.10834	0.11351	0.10131	0.03818
Kuwait		0.25547	0.1047	0.1047	0.12983	0.15077	0.14658	0.19998	0.29753	0.36752	0.43481	0.26803	0.01885	0.09687	0.2004	0.22074	0.22074	0.34387	0.34276	0.33277	0.31946	0.35496	0.31429	0.2958	0.33647	0.35866	0.44306	0.44702	0.43442	0.45747	0.41097	0.4547	0.51226
Lebanon		0	0	0	0	0	0	0	0	0	0	0	0	0	0	0	0	0	0	0	0	0	0	0	0	0	0	0	0	0	0.00147	0.00553	0
Oman		0.02932	0.03455	0.04293	0.0534	0.04921	0.05759	0.07329	0.08355	0.07653	0.10317	0.10365	0.12983	0.12239	0.14642	0.15345	0.1357	0.13385	0.16602	0.24255	0.19005	0.23183	0.23442	0.24182	0.23627	0.24736	0.33032	0.38795	0.39199	0.48701	0.53059	0.63325	0.63181
Palestinian Territories		--	--	--	--	--	--	--	--	--	--	--	--	--	--	--	--	--	0	0	0	0	0	0	0	0	0	0	0	0	0	0	0
Qatar		0.19265	0.16454	0.19474	0.18228	0.21882	0.19998	0.20207	0.20741	0.21668	0.22518	0.28897	0.34342	0.41966	0.49916	0.49915	0.49916	0.50655	0.53761	0.54686	0.5158	0.55684	0.40487	0.41079	0.45146	0.55573	0.73369	0.7694	0.77293	0.79259	0.82786	0.85532	0.76626
Saudi Arabia		0.3497	0.5905	0.45022	0.43765	0.64914	0.74965	0.93183	0.99078	1.0759	1.10185	1.12762	1.18311	1.25714	1.3274	1.39394	1.40652	1.52854	1.67644	1.73116	1.70824	1.84172	1.98518	2.09647	2.22071	2.42851	2.56616	2.64612	2.68071	2.89755	2.82587	3.15763	3.57439
Syria		0.01635	0.00849	0.00866	0.00847	0.00866	0.00481	0.00866	0.02106	0.01733	0.03398	0.09909	0.11929	0.1223	0.1257	0.12909	0.09988	0.13657	0.15492	0.19534	0.2052	0.20724	0.18991	0.25143	0.25328	0.26252	0.21801	0.22337	0.21443	0.21586	0.26518	0.34416	0.2902
United Arab Emirates		0.10994	0.1403	0.09528	0.19055	0.25233	0.39472	0.45126	0.60675	0.65045	0.73469	0.69417	0.82713	0.94439	0.83504	0.80125	0.91661	1.00387	1.07227	1.12366	1.14511	1.16212	1.20094	1.34736	1.40061	1.48676	1.52521	1.59324	1.81805	2.19778	2.16595	2.23845	2.78801
Yemen		0	0	0	0	0	0	0	0	0	0	0	0	0	0	0	0	0	0	0	0	0	0	0	0	0	0	0	0	0	0.01386	0.03657	0.03349
Africa		0.83315	0.68804	0.93403	1.14243	1.24561	1.208	1.28458	1.39222	1.47278	1.50167	1.51526	1.68664	1.65561	1.70642	1.78388	1.87281	1.94098	1.93786	1.99061	2.02983	2.20208	2.46163	2.54445	2.76462	2.81811	3.17277	3.07111	3.16835	3.73287	3.5748	3.74887	3.95955
Algeria		0.5428	0.40828	0.65254	0.77408	0.8024	0.68912	0.71036	0.77377	0.84051	0.77922	0.80358	0.9145	0.8614	0.77301	0.81468	0.87552	0.85888	0.80237	0.82983	0.84814	0.81829	0.81351	0.81232	0.8167	0.76734	0.95381	1.01888	1.05299	1.10147	1.14449	1.14704	1.22385
Angola		0.00961	0.00925	0.01047	0.01298	0.01256	0.01361	0.01466	0.01665	0.01849	0.0159	0.01989	0.02094	0.02108	0.02071	0.01922	0.0207	0.02071	0.02108	0.02145	0.02071	0.02108	0.0196	0.02292	0.02403	0.02773	0.02341	0.02449	0.0299	0.02449	0.02485	0.0264	0.02709
Benin		0	0	0	0	0	0	0	0	0	0	0	0	0	0	0	0	0	0	0	0	0	0	0	0	0	0	0	0	0	0	0	0
Botswana		0	0	0	0	0	0	0	0	0	0	0	0	0	0	0	0	0	0	0	0	0	0	0	0	0	0	0	0	0	0	0	0
Burkina Faso		0	0	0	0	0	0	0	0	0	0	0	0	0	0	0	0	0	0	0	0	0	0	0	0	0	0	0	0	0	0	0	0
Burundi		0	0	0	0	0	0	0	0	0	0	0	0	0	0	0	0	0	0	0	0	0	0	0	0	0	0	0	0	0	0	0	0
Cameroon		0	0	0	0	0	0	0	0	0	0	0	0	0	0	0	0	0	0	0	0	0	0	0	0	0	0	0.00072	0.00072	0.00072	0.00072	0.00756	0.0054
Cape Verde		0	0	0	0	0	0	0	0	0	0	0	0	0	0	0	0	0	0	0	0	0	0	0	0	0	0	0	0	0	0	0	0
Central African Republic		0	0	0	0	0	0	0	0	0	0	0	0	0	0	0	0	0	0	0	0	0	0	0	0	0	0	0	0	0	0	0	0
Chad		0	0	0	0	0	0	0	0	0	0	0	0	0	0	0	0	0	0	0	0	0	0	0	0	0	0	0	0	0	0	0	0
Comoros		0	0	0	0	0	0	0	0	0	0	0	0	0	0	0	0	0	0	0	0	0	0	0	0	0	0	0	0	0	0	0	0
Congo (Brazzaville)		0.00042	0.00063	0.00063	0.00073	0.00073	0.00209	0.00042	0.00209	0	0	0	0	0	0	0	0	0	0	0	0	0	0	0	0	0	0.00432	0.00648	0.01045	0.01333	0.01909	0.0335	0.04142
Congo (Kinshasa)		0	0	0	0	0	0	0	0	0	0	0	0	0	0	0	0	0	0	0	0	0	0	0	0	0	0	0	0	0	0	0	0
Cote dIvoire (IvoryCoast)		0	0	0	0	0	0	0	0	0	0	0	0	0	0	0	0.00148	0.02034	0.02218	0.02958	0.04955	0.04992	0.04992	0.04737	0.04737	0.04596	0.04596	0.04596	0.05303	0.05656	0.05656	0.05303	0.05303
Djibouti		0	0	0	0	0	0	0	0	0	0	0	0	0	0	0	0	0	0	0	0	0	0	0	0	0	0	0	0	0	0	0	0
Egypt		0.03141	0.05235	0.09842	0.11873	0.14972	0.18323	0.2094	0.23222	0.25585	0.28618	0.29944	0.33609	0.3654	0.41745	0.44332	0.45959	0.49546	0.49916	0.50803	0.54242	0.67664	0.90773	0.92437	1.09519	1.16323	1.23229	1.0194	1.10337	1.5147	1.59827	1.6631	1.82808
Equatorial Guinea		0	0	0	0	0	0	0	0	0	0	0	0	0	0	0	0	0	0	0.00074	0.00074	0.00111	0.00111	0.04696	0.04807	0.0037	0.04807	0.04807	0.05513	0.05509	0.05731	0.05842	0.0599
Eritrea		--	--	--	--	--	--	--	--	--	--	--	--	--	--	0	0	0	0	0	0	0	0	0	0	0	0	0	0	0	0	0	0
Ethiopia		0	0	0	0	0	0	0	0	0	0	0	0	0	0	0	0	0	0	0	0	0	0	0	0	0	0	0	0	0	0	0	0
Gabon		0.00259	0.00222	0.00209	0.00555	0.00555	0.00209	0.00105	0.00429	0.0037	0.00333	0.00314	0.00372	0.0037	0.0037	0.0037	0.0037	0.0037	0.0037	0.0037	0.0037	0.00296	0.00296	0.00333	0.00333	0.0037	0.00357	0.00357	0.00286	0.00286	0.00286	0.00286	0.0025
Gambia, The		0	0	0	0	0	0	0	0	0	0	0	0	0	0	0	0	0	0	0	0	0	0	0	0	0	0	0	0	0	0	0	0
Ghana		0	0	0	0	0	0	0	0	0	0	0	0	0	0	0	0	0	0	0	0	0	0	0	0	0	0	0	0	0	0	0	0
Guinea		0	0	0	0	0	0	0	0	0	0	0	0	0	0	0	0	0	0	0	0	0	0	0	0	0	0	0	0	0	0	0	0
Guinea-Bissau		0	0	0	0	0	0	0	0	0	0	0	0	0	0	0	0	0	0	0	0	0	0	0	0	0	0	0	0	0	0	0	0
Kenya		0	0	0	0	0	0	0	0	0	0	0	0	0	0	0	0	0	0	0	0	0	0	0	0	0	0	0	0	0	0	0	0
Lesotho		0	0	0	0	0	0	0	0	0	0	0	0	0	0	0	0	0	0	0	0	0	0	0	0	0	0	0	0	0	0	0	0
Liberia		0	0	0	0	0	0	0	0	0	0	0	0	0	0	0	0	0	0	0	0	0	0	0	0	0	0	0	0	0	0	0	0
Libya		0.18846	0.11517	0.09214	0.11726	0.12773	0.14972	0.1759	0.1683	0.16417	0.1725	0.18322	0.18338	0.18218	0.176	0.18154	0.17933	0.19301	0.20151	0.20151	0.15677	0.19227	0.19929	0.20632	0.17563	0.21926	0.21	0.16912	0.19163	0.19812	0.21649	0.24653	0.15089
Madagascar		0	0	0	0	0	0	0	0	0	0	0	0	0	0	0	0	0	0	0	0	0	0	0	0	0	0	0	0	0	0	0	0
Malawi		0	0	0	0	0	0	0	0	0	0	0	0	0	0	0	0	0	0	0	0	0	0	0	0	0	0	0	0	0	0	0	0
Mali		0	0	0	0	0	0	0	0	0	0	0	0	0	0	0	0	0	0	0	0	0	0	0	0	0	0	0	0	0	0	0	0
Mauritania		0	0	0	0	0	0	0	0	0	0	0	0	0	0	0	0	0	0	0	0	0	0	0	0	0	0	0	0	0	0	0	0
Mauritius		0	0	0	0	0	0	0	0	0	0	0	0	0	0	0	0	0	0	0	0	0	0	0	0	0	0	0	0	0	0	0	0
Morocco		0.00259	0.00333	0.00314	0.00335	0.00209	0.00314	0.00314	0.0022	0.00222	0.00222	0.00209	0.00144	0.00089	0.00111	0.00111	0.00074	0.00074	0.00185	0.00185	0.00185	0.00185	0.00185	0.00185	0.00185	0.00185	0.00186	0.00223	0.00134	0.02078	0.02078	0.02078	0.00779
Mozambique		0	0	0	0	0	0	0	0	0	0	0	0	0	0	0	0	0	0	0.00222	0.00222	0.00222	0.00222	0.00222	0.00296	0.00296	0.0072	0.01441	0.0072	0.00648	0.0054	0.00288	0.01873
Namibia		--	--	--	--	--	--	--	--	--	--	0	0	0	0	0	0	0	0	0	0	0	0	0	0	0	0	0	0	0	0	0	0
Niger		0	0	0	0	0	0	0	0	0	0	0	0	0	0	0	0	0	0	0	0	0	0	0	0	0	0	0	0	0	0	0	0
Nigeria		0.03957	0.07957	0.05235	0.08502	0.10156	0.11308	0.12145	0.13684	0.1394	0.17378	0.13716	0.1759	0.18118	0.18672	0.16823	0.19189	0.20188	0.2163	0.21815	0.22961	0.24884	0.22961	0.23516	0.31466	0.34461	0.37318	0.39335	0.38183	0.44216	0.14985	0.18119	0.19452
Reunion		0	0	0	0	0	0	0	0	0	0	0	0	0	0	0	0	0	0	0	0	0	0	0	0	0	0	0	0	0	0	0	0
Rwanda		0	0	0	0	0	0	0	0	0	0	0	0	0	0	0	0	0	0	0	0	0	0	0	0	0	0	0	0	0	0	0	0
Saint Helena		0	0	0	0	0	0	0	0	0	0	0	0	0	0	0	0	0	0	0	0	0	0	0	0	0	0	0	0	0	0	0	0
Sao Tome and Principe		0	0	0	0	0	0	0	0	0	0	0	0	0	0	0	0	0	0	0	0	0	0	0	0	0	0	0	0	0	0	0	0
Senegal		0	0	0	0	0	0	0	0	0	0	0	0	0	0.00063	0.00127	0.00159	0.0019	0.00127	0.00127	0.00127	0.00159	0.00159	0.00159	0.00159	0.00159	0.00159	0.00159	0.00159	0.00159	0.00159	0.00063	0.00063
Seychelles		0	0	0	0	0	0	0	0	0	0	0	0	0	0	0	0	0	0	0	0	0	0	0	0	0	0	0	0	0	0	0	0
Sierra Leone		0	0	0	0	0	0	0	0	0	0	0	0	0	0	0	0	0	0	0	0	0	0	0	0	0	0	0	0	0	0	0	0
Somalia		0	0	0	0	0	0	0	0	0	0	0	0	0	0	0	0	0	0	0	0	0	0	0	0	0	0	0	0	0	0	0	0
South Africa		0	0	0	0	0	0	0	0	0	0	0	0	0.00148	0.06655	0.0721	0.07247	0.06807	0.06471	0.05361	0.05176	0.06101	0.07765	0.08504	0.0843	0.08245	0.07925	0.15129	0.143	0.14841	0.12932	0.14445	0.16498
Sudan and South Sudan		0	0	0	0	0	0	0	0	0	0	0	0	0	0	0	0	0	0	0	0	0	0	0	0	0	0	0	0	0	0	0	0
Swaziland		0	0	0	0	0	0	0	0	0	0	0	0	0	0	0	0	0	0	0	0	0	0	0	0	0	0	0	0	0	0	0	0
Tanzania		0	0	0	0	0	0	0	0	0	0	0	0	0	0	0	0	0	0	0	0	0	0	0	0	0.0044	0.01469	0.01816	0.01909	0.02017	0.0237	0.0281	0.03098
Togo		0	0	0	0	0	0	0	0	0	0	0	0	0	0	0	0	0	0	0	0	0	0	0	0	0	0	0	0	0	0	0	0
Tunisia		0.01571	0.01724	0.02225	0.02472	0.04326	0.05191	0.0482	0.05585	0.04845	0.06854	0.06674	0.05068	0.03832	0.06054	0.07871	0.06579	0.07629	0.10374	0.11867	0.1211	0.12432	0.1546	0.155	0.14895	0.14935	0.17357	0.15339	0.11423	0.12594	0.12352	0.1324	0.14975
Uganda		0	0	0	0	0	0	0	0	0	0	0	0	0	0	0	0	0	0	0	0	0	0	0	0	0	0	0	0	0	0	0	0
Western Sahara		0	0	0	0	0	0	0	0	0	0	0	0	0	0	0	0	0	0	0	0	0	0	0	0	0	0	0	0	0	0	0	0
Zambia		0	0	0	0	0	0	0	0	0	0	0	0	0	0	0	0	0	0	0	0	0	0	0	0	0	0	0	0	0	0	0	0
Zimbabwe		0	0	0	0	0	0	0	0	0	0	0	0	0	0	0	0	0	0	0	0	0	0	0	0	0	0	0	0	0	0	0	0
Asia & Oceania		2.77078	2.90126	2.95689	3.22332	3.83011	4.2699	4.54838	4.87696	5.30162	5.58749	6.21214	6.66291	6.96343	7.39888	8.01236	8.47574	9.15061	9.60147	9.72263	10.4719	10.9589	11.1129	12.0865	12.6363	13.2878	14.4421	16.0185	17.6052	18.2411	19.1722	21.4485	23.0127
Afghanistan		0.00209	0.00314	0.00524	0.00524	0.00524	0	0	0.02255	0.07321	0.07149	0.07015	0.01152	0.01109	0.01109	0.01109	0.00739	0.0085	0.0085	0.0085	0.0085	0.0085	0.00185	0.00185	0.00074	0.00074	0.00074	0.00074	0.00148	0.00185	0.00111	0.00518	0.00518
American Samoa		0	0	0	0	0	0	0	0	0	0	0	0	0	0	0	0	0	0	0	0	0	0	0	0	0	0	0	0	0	0	0	0
Australia		0.33885	0.38726	0.42902	0.4346	0.46408	0.49544	0.54128	0.55488	0.57886	0.59451	0.6525	0.61028	0.63208	0.65789	0.68776	0.73808	0.74077	0.74599	0.78171	0.8092	0.84955	0.89577	0.94626	0.97736	1.04407	1.18708	1.20737	1.19281	1.21413	1.22653	1.28305	1.42265
Bangladesh		0.04705	0.05616	0.06117	0.06455	0.0894	0.0941	0.10633	0.12356	0.14123	0.15452	0.15244	0.16279	0.19407	0.2134	0.23226	0.2548	0.26379	0.26379	0.2835	0.31289	0.33536	0.35611	0.38376	0.43208	0.47003	0.50726	0.55509	0.58951	0.64857	0.71017	0.7214	0.72865
Bhutan		0	0	0	0	0	0	0	0	0	0	0	0	0	0	0	0	0	0	0	0	0	0	0	0	0	0	0	0	0	0	0	0
Brunei		0.07284	0.07527	0.08498	0.06313	0.05342	0.06434	0.04006	0.06942	0.05873	0.06904	0.05584	0.01731	0.04039	0.03301	0.02853	0.03954	0.03179	0.03586	0.03097	0.03845	0.04067	0.04992	0.06175	0.06397	0.07395	0.09054	0.15373	0.15801	0.16182	0.09594	0.11443	0.11636
Burma (Myanmar)		0.01152	0.01256	0.01665	0.01958	0.02408	0.02932	0.03979	0.04209	0.03845	0.0403	0.03979	0.03692	0.03635	0.04094	0.05323	0.06105	0.05956	0.05621	0.06551	0.05146	0.05872	0.06188	0.08189	0.09343	0.09938	0.1541	0.13474	0.15335	0.1433	0.12097	0.1206	0.12432
Cambodia		0	0	0	0	0	0	0	0	0	0	0	0	0	0	0	0	0	0	0	0	0	0	0	0	0	0	0	0	0	0	0	0
China		0.58126	0.51795	0.43853	0.49608	0.50414	0.52601	0.55708	0.56894	0.57929	0.58126	0.56902	0.58851	0.59481	0.62263	0.656	0.67573	0.75067	0.8103	0.84212	0.90911	0.94298	1.01808	1.10904	1.19488	1.41107	1.73558	2.09114	2.61207	2.85913	3.27841	3.95312	4.8501
Cook Islands		0	0	0	0	0	0	0	0	0	0	0	0	0	0	0	0	0	0	0	0	0	0	0	0	0	0	0	0	0	0	0	0
Fiji		0	0	0	0	0	0	0	0	0	0	0	0	0	0	0	0	0	0	0	0	0	0	0	0	0	0	0	0	0	0	0	0
French Polynesia		0	0	0	0	0	0	0	0	0	0	0	0	0	0	0	0	0	0	0	0	0	0	0	0	0	0	0	0	0	0	0	0
Guam		0	0	0	0	0	0	0	0	0	0	0	0	0	0	0	0	0	0	0	0	0	0	0	0	0	0	0	0	0	0	0	0
Hawaiian Trade Zone		0	0	0	0	0	0	0	--	--	--	--	--	--	--	--	--	--	--	--	--	--	--	--	--	--	--	--	--	--	--	--	--
Hong Kong		0	0	0	0	0	0	0	0	0	0	0.01427	0.01539	0.01726	0.0182	0.01965	0.02083	0.06892	0.10885	0.10144	0.11198	0.09976	0.10068	0.09569	0.07107	0.09332	0.11059	0.10801	0.0969	0.12103	0.11552	0.14481	0.11509
India		0.0587	0.07366	0.09995	0.11859	0.1269	0.1516	0.20718	0.26093	0.35681	0.36278	0.45925	0.5168	0.54874	0.61215	0.68328	0.72231	0.72009	0.74127	0.78655	0.77778	0.8216	0.88003	0.95671	1.0017	1.13012	1.31872	1.42329	1.51759	1.5741	1.95607	2.36629	2.34867
Indonesia		0.27309	0.2727	0.25911	0.34768	0.40595	0.48014	0.51782	0.53569	0.56871	0.63669	0.69264	0.84142	0.87638	0.92615	1.05201	1.15673	1.2391	1.22678	1.07127	1.22563	1.04394	0.79104	0.86879	0.87765	0.73599	0.78372	1.08166	1.22794	1.30223	1.46544	1.5228	1.44658
Japan		0.96711	0.99027	1.00267	1.07035	1.4368	1.53658	1.56422	1.61552	1.69405	1.81063	2.14168	2.29704	2.29898	2.34134	2.4643	2.54414	2.66568	2.73527	2.8254	2.9734	3.07709	3.06203	3.2734	3.2734	3.29616	3.28425	3.6291	3.95798	3.87258	3.85759	4.06307	4.60557
Kiribati		0	0	0	0	0	0	0	0	0	0	0	0	0	0	0	0	0	0	0	0	0	0	0	0	0	0	0	0	0	0	0	0
Korea, North		0	0	0	0	0	0	0	0	0	0	0	0	0	0	0	0	0	0	0	0	0	0	0	0	0	0	0	0	0	0	0	0
Korea, South		0	0	0	0	0	0	0.00281	0.08358	0.10798	0.10451	0.11973	0.13863	0.18174	0.22702	0.3022	0.36541	0.48275	0.58719	0.54929	0.66887	0.74815	0.80434	0.92167	0.96035	1.13218	1.20437	1.28741	1.3908	1.41469	1.35992	1.70262	1.81119
Laos		0	0	0	0	0	0	0	0	0	0	0	0	0	0	0	0	0	0	0	0	0	0	0	0	0	0	0	0	0	0	0	0
Macau		0	0	0	0	0	0	0	0	0	0	0	0	0	0	0	0	0	0	0	0	0	0	0	0	0	0	0	0	0	0	0	0
Malaysia		0.05841	0.06467	0.05528	0.08031	0.15854	0.23468	0.291	0.27634	0.30167	0.31015	0.32855	0.39947	0.40468	0.48194	0.50723	0.51057	0.59238	0.62065	0.64742	0.68795	0.8631	0.94305	1.03528	1.01929	0.92595	0.96239	0.98991	1.11932	1.19109	1.15799	1.21303	1.13866
Maldives		0	0	0	0	0	0	0	0	0	0	0	0	0	0	0	0	0	0	0	0	0	0	0	0	0	0	0	0	0	0	0	0
Mongolia		0	0	0	0	0	0	0	0	0	0	0	0	0	0	0	0	0	0	0	0	0	0	0	0	0	0	0	0	0	0	0	0
Nauru		0	0	0	0	0	0	0	0	0	0	0	0	0	0	0	0	0	0	0	0	0	0	0	0	0	0	0	0	0	0	0	0
Nepal		0	0	0	0	0	0	0	0	0	0	0	0	0	0	0	0	0	0	0	0	0	0	0	0	0	0	0	0	0	0	0	0
New Caledonia		0	0	0	0	0	0	0	0	0	0	0	0	0	0	0	0	0	0	0	0	0	0	0	0	0	0	0	0	0	0	0	0
New Zealand		0.03594	0.04402	0.07633	0.08133	0.10433	0.13499	0.15935	0.15375	0.16832	0.17227	0.17289	0.18455	0.19832	0.17937	0.18019	0.17199	0.19433	0.20893	0.18391	0.21052	0.21192	0.23765	0.22293	0.1706	0.14969	0.13663	0.15492	0.15815	0.14722	0.14987	0.15958	0.15433
Niue		0	0	0	0	0	0	0	0	0	0	0	0	0	0	0	0	0	0	0	0	0	0	0	0	0	0	0	0	0	0	0	0
Pakistan		0.2789	0.30771	0.34515	0.33345	0.33064	0.34091	0.36613	0.39153	0.41527	0.44364	0.45019	0.49876	0.51437	0.54452	0.5858	0.60328	0.65045	0.65243	0.66298	0.73225	0.79921	0.72334	0.70439	0.77425	0.8399	0.94304	1.10593	1.12675	1.16349	1.18523	1.2134	1.1987
Papua New Guinea		0	0	0	0	0	0	0	0	0	0	0	0	0.00222	0.00296	0.00185	0.0037	0.00481	0.00407	0.00407	0.00407	0.00407	0.00407	0.00407	0.00518	0.00518	0.0037	0.00518	0.00503	0.00481	0.0037	0.00407	0.0037
Philippines		0	0	0	0	0	0	0	0	0	0	0	0	0	0	0	0.00034	0.00035	0.00035	0.00035	0.00035	0.00035	0.0069	0.07254	0.10518	0.10518	0.10528	0.07987	0.10528	0.10673	0.11436	0.10383	0.10528
Samoa		0	0	0	0	0	0	0	0	0	0	0	0	0	0	0	0	0	0	0	0	0	0	0	0	0	0	0	0	0	0	0	0
Singapore		0	0	0	0	0	0	0	0	0	0	0	0	0.04068	0.05546	0.05546	0.05546	0.05546	0.05546	0.05546	0.05546	0.05546	0.04363	0.04326	0.19671	0.2444	0.2381	0.2381	0.3105	0.31663	0.29033	0.30258	0.31627
Solomon Islands		0	0	0	0	0	0	0	0	0	0	0	0	0	0	0	0	0	0	0	0	0	0	0	0	0	0	0	0	0	0	0	0
Sri Lanka		0	0	0	0	0	0	0	0	0	0	0	0	0	0	0	0	0	0	0	0	0	0	0	0	0	0	0	0	0	0	0	0
Taiwan		0.04502	0.05553	0.0335	0.04921	0.05444	0.05235	0.04188	0.04523	0.02514	0.05251	0.08376	0.105	0.11466	0.11124	0.14055	0.1508	0.17232	0.20568	0.24107	0.24328	0.26809	0.26692	0.31726	0.32428	0.38945	0.40623	0.41482	0.44447	0.45501	0.47218	0.59159	0.63256
Thailand		0	0.04	0.047	0.0569	0.07	0.128	0.112	0.1315	0.19281	0.18211	0.208	0.236	0.249	0.31042	0.34184	0.36763	0.41852	0.52548	0.55549	0.61415	0.68833	0.81806	0.90328	0.9954	1.03129	1.12341	1.14894	1.2214	1.2873	1.35147	1.55538	1.60679
Timor-Leste (East Timor)		--	--	--	--	--	--	--	--	--	--	--	--	--	--	--	--	--	--	--	--	--	--	--	0	0	0	0	0	0	0	0	0
Tonga		0	0	0	0	0	0	0	0	0	0	0	0	0	0	0	0	0	0	0	0	0	0	0	0	0	0	0	0	0	0	0	0
U.S. Pacific Islands		0	0	0	0	0	0	0	0	0	0	0	0	0	0	0	0	0	0	0	0	0	0	0	0	0	0	0	0	0	0	0	0
Vanuatu		0	0	0	0	0	0	0	0	0	0	0	0	0	0	0	0	0	0	0	0	0	0	0	0	0	0	0	0	0	0	0	0
Vietnam		0	0.00036	0.00232	0.00232	0.00218	0.00145	0.00145	0.00145	0.00109	0.00109	0.00145	0.00253	0.00761	0.00915	0.00915	0.02597	0.03037	0.00841	0.02561	0.03659	0.04207	0.04756	0.08269	0.09878	0.10976	0.14635	0.20854	0.21586	0.25537	0.2594	0.30769	0.28208
Wake Island		0	0	0	0	0	0	0	0	0	0	0	0	0	0	0	0	0	0	0	0	0	0	0	0	0	0	0	0	0	0	0	0
World		53.8648	53.8947	54.0532	55.1505	60.8446	63.3722	64.2248	67.5605	71.0121	74.2302	75.3664	76.8978	77.0409	79.0408	78.8837	81.1364	83.2454	83.5106	84.1529	86.3611	89.8073	90.2824	94.074	96.9624	100.397	103.225	106.106	109.275	112.789	108.622	117.104	123.319
