# Supplementary material
Source: MDPI journal article supplement (https://www.mdpi.com/1099-4300/15/12/5565)
Supplement: s2 [file s2 › Sources/Raw Data/Dry_Natural_Gas_Production_(Quadrillion_Btu).xls]

## Sheet: Data3
Table: Dry Natural Gas Production (Quadrillion Btu)
		1980	1981	1982	1983	1984	1985	1986	1987	1988	1989	1990	1991	1992	1993	1994	1995	1996	1997	1998	1999	2000	2001	2002	2003	2004	2005	2006	2007	2008	2009	2010	2011
Bermuda		0	0	0	0	0	0	0	0	0	0	0	0	0	0	0	0	0	0	0	0	0	0	0	0	0	0	0	0	0	0	0	0
Canada		2.8056	2.70157	2.7853	2.61255	2.83969	3.09618	2.90156	3.14955	3.63476	3.77911	3.90287	4.11836	4.59712	4.99342	5.45028	5.72063	5.83082	5.89488	6.11943	6.40933	6.5991	6.74197	6.77734	6.6148	6.64499	6.738	6.72472	6.59539	6.20899	5.8083	5.57303	5.39556
Greenland		0	0	0	0	0	0	0	0	0	0	0	0	0	0	0	0	0	0	0	0	0	0	0	0	0	0	0	0	0	0	0	0
Mexico		0.95018	1.02048	1.09983	1.08047	1.06426	1.04968	0.93083	0.94397	0.95381	0.90881	1.00323	1.00328	0.97529	1.05455	1.08308	1.06303	1.20769	1.24066	1.34714	1.36288	1.38281	1.39313	1.42825	1.49671	1.27714	1.38495	1.80845	1.72209	1.71104	1.72006	1.87601	1.89107
Saint Pierre and Miquelon		0	0	0	0	0	0	0	0	0	0	0	0	0	0	0	0	0	0	0	0	0	0	0	0	0	0	0	0	0	0	0	0
United States		19.9075	19.6989	18.319	16.5929	18.0074	16.9805	16.5408	17.1362	17.599	17.8476	18.3265	18.2287	18.3752	18.5836	19.348	19.0826	19.3442	19.3935	19.6137	19.3407	19.6615	20.1653	19.3823	19.6338	19.0744	18.5564	19.0221	19.7862	20.7033	21.1396	21.8063	23.4058
Antarctica		0	0	0	0	0	0	0	0	0	0	0	0	0	0	0	0	0	0	0	0	0	0	0	0	0	0	0	0	0	0	0	0
Antigua and Barbuda		0	0	0	0	0	0	0	0	0	0	0	0	0	0	0	0	0	0	0	0	0	0	0	0	0	0	0	0	0	0	0	0
Argentina		0.28728	0.355	0.40937	0.45657	0.50684	0.513	0.56122	0.5407	0.64889	0.73843	0.6464	0.7355	0.74141	0.79418	0.82185	0.92298	0.98054	1.01044	1.09199	1.27578	1.38059	1.37062	1.33261	1.51455	1.65626	1.68394	1.70128	1.65441	1.626	1.52643	1.47986	1.43077
Aruba		--	--	--	--	--	--	0	0	0	0	0	0	0	0	0	0	0	0	0	0	0	0	0	0	0	0	0	0	0	0	0	0
Bahamas, The		0	0	0	0	0	0	0	0	0	0	0	0	0	0	0	0	0	0	0	0	0	0	0	0	0	0	0	0	0	0	0	0
Barbados		0.00037	0.00037	0.00037	0.00042	0.00042	0.00042	0.00042	0.00031	0.00097	0.00105	0.00105	0.00083	0.0008	0.00112	0.00082	0.00097	0.00108	0.00108	0.00108	0.00108	0.00108	0.00108	0.00108	0.00108	0.00108	0.00108	0.00108	0.00104	0.00118	0.00074	0.00074	0
Belize		0	0	0	0	0	0	0	0	0	0	0	0	0	0	0	0	0	0	0	0	0	0	0	0	0	0	0	0	0	0	0	0
Bolivia		0.07371	0.07277	0.081	0.0843	0.092	0.089	0.092	0.0914	0.09818	0.10736	0.107	0.104	0.11	0.10311	0.10489	0.11744	0.11403	0.11699	0.11182	0.09115	0.12252	0.17271	0.21404	0.26645	0.37089	0.45577	0.48677	0.51998	0.54105	0.46573	0.53031	0.58272
Brazil		0.05662	0.05662	0.05092	0.0631	0.08192	0.10184	0.09963	0.11601	0.1079	0.13565	0.11398	0.13966	0.15299	0.15184	0.15829	0.16564	0.18547	0.20274	0.21302	0.22661	0.26774	0.24314	0.2986	0.32394	0.35479	0.36504	0.36915	0.36765	0.47152	0.38409	0.4704	0.54476
Cayman Islands		0	0	0	0	0	0	0	0	0	0	0	0	0	0	0	0	0	0	0	0	0	0	0	0	0	0	0	0	0	0	0	0
Chile		0.085	0.085	0.049	0.046	0.048	0.044	0.026	0.0258	0.03532	0.05686	0.066	0.052	0.05544	0.0618	0.06851	0.0671	0.06712	0.07898	0.07379	0.0445	0.04227	0.0445	0.04075	0.06853	0.04038	0.07557	0.07261	0.06587	0.0642	0.07203	0.0693	0.05531
Colombia		0.1188	0.1272	0.1272	0.1224	0.1716	0.1728	0.1728	0.13006	0.13582	0.13549	0.14028	0.144	0.14009	0.14585	0.15092	0.14927	0.15551	0.19586	0.20538	0.16994	0.187	0.1998	0.2021	0.1998	0.20275	0.21883	0.23687	0.25065	0.29527	0.34415	0.36941	0.35924
Costa Rica		0	0	0	0	0	0	0	0	0	0	0	0	0	0	0	0	0	0	0	0	0	0	0	0	0	0	0	0	0	0	0	0
Cuba		0.00062	0.00032	0.00032	0.00028	0.00013	0.00025	0.00021	0.00082	0.00074	0.00115	0.00119	0.00124	0.00128	0.00131	0.00128	0.00152	0.00159	0.02773	0.01479	0.01849	0.02218	0.01109	0.01294	0.01368	0.01368	0.01479	0.01479	0.02218	0.04289	0.04289	0.03956	0.03808
Dominica		0	0	0	0	0	0	0	0	0	0	0	0	0	0	0	0	0	0	0	0	0	0	0	0	0	0	0	0	0	0	0	0
Dominican Republic		0	0	0	0	0	0	0	0	0	0	0	0	0	0	0	0	0	0	0	0	0	0	0	0	0	0	0	0	0	0	0	0
Ecuador		0.0039	0.00252	0.0026	0.0039	0.0052	0.0052	0.0039	0.00247	0.00368	0.00367	0.0052	0.00419	0.00459	0.00459	0.00459	0.00551	0.00551	0.00459	0.00459	0.00459	0.00643	0.00735	0.00459	0.00689	0.0078	0.01194	0.01285	0.01263	0.01194	0.01359	0.01515	0.01102
El Salvador		0	0	0	0	0	0	0	0	0	0	0	0	0	0	0	0	0	0	0	0	0	0	0	0	0	0	0	0	0	0	0	0
Falkland Islands (Islas Malvinas)		0	0	0	0	0	0	0	0	0	0	0	0	0	0	0	0	0	0	0	0	0	0	0	0	0	0	0	0	0	0	0	0
French Guiana		0	0	0	0	0	0	0	0	0	0	0	0	0	0	0	0	0	0	0	0	0	0	0	0	0	0	0	0	0	0	0	0
Grenada		0	0	0	0	0	0	0	0	0	0	0	0	0	0	0	0	0	0	0	0	0	0	0	0	0	0	0	0	0	0	0	0
Guadeloupe		0	0	0	0	0	0	0	0	0	0	0	0	0	0	0	0	0	0	0	0	0	0	0	0	0	0	0	0	0	0	0	0
Guatemala		0	0	0	0	0	0	0	0	0	0	0	0	0	0	0	0	0	0	0	0	0	0	0	0	0	0	0	0	0	0	0	0
Guyana		0	0	0	0	0	0	0	0	0	0	0	0	0	0	0	0	0	0	0	0	0	0	0	0	0	0	0	0	0	0	0	0
Haiti		0	0	0	0	0	0	0	0	0	0	0	0	0	0	0	0	0	0	0	0	0	0	0	0	0	0	0	0	0	0	0	0
Honduras		0	0	0	0	0	0	0	0	0	0	0	0	0	0	0	0	0	0	0	0	0	0	0	0	0	0	0	0	0	0	0	0
Jamaica		0	0	0	0	0	0	0	0	0	0	0	0	0	0	0	0	0	0	0	0	0	0	0	0	0	0	0	0	0	0	0	0
Martinique		0	0	0	0	0	0	0	0	0	0	0	0	0	0	0	0	0	0	0	0	0	0	0	0	0	0	0	0	0	0	0	0
Montserrat		0	0	0	0	0	0	0	0	0	0	0	0	0	0	0	0	0	0	0	0	0	0	0	0	0	0	0	0	0	0	0	0
Netherlands Antilles		0	0	0	0	0	0	0	0	0	0	0	0	0	0	0	0	0	0	0	0	0	0	0	0	0	0	0	0	0	0	0	0
Nicaragua		0	0	0	0	0	0	0	0	0	0	0	0	0	0	0	0	0	0	0	0	0	0	0	0	0	0	0	0	0	0	0	0
Panama		0	0	0	0	0	0	0	0	0	0	0	0	0	0	0	0	0	0	0	0	0	0	0	0	0	0	0	0	0	0	0	0
Paraguay		0	0	0	0	0	0	0	0	0	0	0	0	0	0	0	0	0	0	0	0	0	0	0	0	0	0	0	0	0	0	0	0
Peru		0.04296	0.05228	0.04908	0.04908	0.04908	0.05015	0.05228	0.04394	0.04101	0.03774	0.01765	0.01706	0.0166	0.03149	0.03215	0.03051	0.03182	0.00787	0.01345	0.01345	0.01115	0.01214	0.01444	0.01706	0.0366	0.06729	0.07581	0.11372	0.15545	0.14779	0.30792	0.4834
Puerto Rico		0	0	0	0	0	0	0	0	0	0	0	0	0	0	0	0	0	0	0	0	0	0	0	0	0	0	0	0	0	0	0	0
Saint Kitts and Nevis		0	0	0	0	0	0	0	0	0	0	0	0	0	0	0	0	0	0	0	0	0	0	0	0	0	0	0	0	0	0	0	0
Saint Lucia		0	0	0	0	0	0	0	0	0	0	0	0	0	0	0	0	0	0	0	0	0	0	0	0	0	0	0	0	0	0	0	0
Saint Vincent/Grenadines		0	0	0	0	0	0	0	0	0	0	0	0	0	0	0	0	0	0	0	0	0	0	0	0	0	0	0	0	0	0	0	0
Suriname		0	0	0	0	0	0	0	0	0	0	0	0	0	0	0	0	0	0	0	0	0	0	0	0	0	0	0	0	0	0	0	0
Trinidad and Tobago		0.08465	0.08465	0.10659	0.13272	0.20064	0.22572	0.15884	0.14975	0.1609	0.16976	0.18497	0.21005	0.20297	0.22781	0.26092	0.2801	0.31627	0.34321	0.34321	0.43289	0.51555	0.56057	0.63844	0.91301	1.03664	1.11746	1.34479	1.43963	1.45033	1.502	1.56695	1.49831
Turks and Caicos Islands		0	0	0	0	0	0	0	0	0	0	0	0	0	0	0	0	0	0	0	0	0	0	0	0	0	0	0	0	0	0	0	0
Uruguay		0	0	0	0	0	0	0	0	0	0	0	0	0	0	0	0	0	0	0	0	0	0	0	0	0	0	0	0	0	0	0	0
Venezuela		0.61575	0.68125	0.7146	0.68602	0.72651	0.73604	0.80273	0.78249	0.78147	0.91531	0.90622	0.94503	0.90926	0.97067	1.04351	1.06025	1.14404	1.18357	1.32237	1.12637	1.14404	1.33373	1.19493	1.02627	1.14404	0.98606	1.09356	0.87187	0.87275	0.77513	1.04856	1.05613
Virgin Islands, U.S.		0	0	0	0	0	0	0	0	0	0	0	0	0	0	0	0	0	0	0	0	0	0	0	0	0	0	0	0	0	0	0	0
Virgin Islands, British		0	0	0	0	0	0	0	0	0	0	0	0	0	0	0	0	0	0	0	0	0	0	0	0	0	0	0	0	0	0	0	0
Albania		0.01047	0.01109	0.01047	0.0111	0.01131	0.01047	0.01466	0.01665	0.02589	0.02589	0.00943	0.00522	0.00376	0.00111	0.00111	0.00111	0.00111	0.00074	0.00111	0.00074	0.00111	0.00111	0.00111	0.00111	0.00111	0.00111	0.00111	0.00037	0.00111	0.00111	0.00037	0.00037
Austria		0.07439	0.05506	0.05077	0.04626	0.04851	0.04451	0.04249	0.04424	0.04771	0.05018	0.04833	0.04982	0.05406	0.05634	0.05086	0.05564	0.05601	0.05361	0.05886	0.0652	0.06406	0.06147	0.06672	0.07421	0.07029	0.05862	0.06533	0.07003	0.05804	0.06318	0.06552	0.06429
Belgium		0.00145	0.00121	0.00115	0.00068	0.0014	0.00151	0.00099	0.00105	0.00063	0.0005	0.00042	0.00036	0.00021	0.00017	5e-05	0	8e-05	0	0	0	6e-05	0	0	0	0	0	0	0	0	0	0	0
Bosnia and Herzegovina		--	--	--	--	--	--	--	--	--	--	--	--	0.00081	0	0	0.03153	0	0	0	0	0	0	0	0	0	0	0	0	0	0	0	0
Bulgaria		0.00425	0.004	0.00283	0.0033	0.00283	0.00378	0.00471	0.00415	0.00033	0.00033	0.00047	0.00032	0.00028	0.00245	0.0021	0.00175	0.0014	0.0014	0.00105	0.0007	0.00208	0.00014	7e-05	7e-05	3e-05	0	0	0.01013	0.00371	0.00034	0.00169	0.01384
Croatia		--	--	--	--	--	--	--	--	--	--	--	--	0.06729	0.07646	0.06656	0.07284	0.06656	0.05916	0.05805	0.05731	0.06138	0.06508	0.05583	0.06664	0.05884	0.0552	0.05663	0.07302	0.07294	0.07097	0.06789	0.0647
Cyprus		0	0	0	0	0	0	0	0	0	0	0	0	0	0	0	0	0	0	0	0	0	0	0	0	0	0	0	0	0	0	0	0
Czech Republic		--	--	--	--	--	--	--	--	--	--	--	--	--	0.0083	0.00981	0.00873	0.00803	0.0072	0.00746	0.00772	0.00746	0.00537	0.00506	0.00578	0.00716	0.00679	0.00649	0.00723	0.00707	0.00642	0.00737	0.0067
Denmark		0	0	0	0.00163	0.01164	0.04713	0.07931	0.10192	0.10224	0.11963	0.12232	0.15318	0.15983	0.17718	0.19147	0.20751	0.25189	0.30547	0.30195	0.31007	0.32828	0.33441	0.33508	0.31757	0.37431	0.41358	0.41117	0.36447	0.39747	0.33147	0.32367	0.27861
Faroe Islands		0	0	0	0	0	0	0	0	0	0	0	0	0	0	0	0	0	0	0	0	0	0	0	0	0	0	0	0	0	0	0	0
Finland		0	0	0	0	0	0	0	0	0	0	0	0	0	0	0	0	0	0	0	0	0	0	0	0	0	0	0	0	0	0	0	0
Former Czechoslovakia		0.01835	0.02341	0.02383	0.02196	0.02694	0.02453	0.02453	0.02354	0.0309	0.02984	0.02515	0.01948	0.00963	--	--	--	--	--	--	--	--	--	--	--	--	--	--	--	--	--	--	--
Former Serbia and Montenegro		--	--	--	--	--	--	--	--	--	--	--	--	0.03128	0.03557	0.02911	0.0335	0.02481	0.02544	0.03483	0.02511	0.02008	0.02226	0.02218	0.0122	0.00887	0.00924	--	--	--	--	--	--
Former Yugoslavia		0.07211	0.07035	0.06457	0.05963	0.07488	0.087	0.09125	0.0817	0.11316	0.10753	0.09973	0.09761	--	--	--	--	--	--	--	--	--	--	--	--	--	--	--	--	--	--	--	--
France		0.27882	0.26245	0.24374	0.24615	0.23381	0.19848	0.15604	0.1447	0.11889	0.11495	0.111	0.12551	0.12274	0.12717	0.13126	0.12315	0.10609	0.09379	0.081	0.07358	0.06632	0.06819	0.06651	0.05743	0.04964	0.04008	0.04422	0.03936	0.03418	0.03251	0.02749	0.02457
Germany		--	--	--	--	--	--	--	--	--	--	--	0.59652	0.60528	0.6065	0.62917	0.66592	0.71985	0.70913	0.69115	0.73692	0.6969	0.70269	0.70515	0.70221	0.64981	0.6274	0.61978	0.57709	0.49899	0.49004	0.42742	0.39681
Germany, East		0.09594	0.10803	0.09438	0.11817	0.1287	0.12948	0.11817	0.11349	0.11973	0.1092	0.05304	--	--	--	--	--	--	--	--	--	--	--	--	--	--	--	--	--	--	--	--	--
Germany, West		0.60295	0.61094	0.52392	0.55855	0.5843	0.53014	0.48574	0.56122	0.52303	0.51504	0.51415	--	--	--	--	--	--	--	--	--	--	--	--	--	--	--	--	--	--	--	--	--
Gibraltar		0	0	0	0	0	0	0	0	0	0	0	0	0	0	0	0	0	0	0	0	0	0	0	0	0	0	0	0	0	0	0	0
Greece		0	0	0.0032	0.00305	0.00335	0.00315	0.00432	0.00493	0.00591	0.00596	0.00561	0.00588	0.00578	0.00411	0.00209	0.00189	0.00204	0.00199	0.00178	0.00011	0.00187	0.00177	0.00187	0.00137	0.00127	0.00081	0.00115	0.00097	0.00065	0.00052	0.00031	0.00027
Hungary		0.22417	0.21759	0.23685	0.22817	0.2389	0.25688	0.24504	0.2414	0.21579	0.20797	0.1677	0.16984	0.16929	0.17129	0.16549	0.16703	0.15875	0.14812	0.13076	0.11566	0.10919	0.1092	0.10387	0.10078	0.1043	0.10276	0.10504	0.08838	0.08848	0.10083	0.09852	0.09329
Iceland		0	0	0	0	0	0	0	0	0	0	0	0	0	0	0	0	0	0	0	0	0	0	0	0	0	0	0	0	0	0	0	0
Ireland		0.03253	0.04958	0.07294	0.07802	0.08274	0.08768	0.0598	0.05955	0.07173	0.08125	0.08274	0.08484	0.08375	0.09507	0.09671	0.09919	0.09561	0.08401	0.06201	0.04863	0.04352	0.0299	0.02956	0.02469	0.03038	0.02038	0.0181	0.01628	0.01561	0.01404	0.0139	0.01252
Italy		0.45271	0.50733	0.52088	0.467	0.49399	0.5086	0.56993	0.58398	0.59389	0.60677	0.61894	0.62198	0.6493	0.69142	0.72953	0.72058	0.72165	0.69606	0.68674	0.63136	0.6009	0.55065	0.52829	0.50163	0.46825	0.43609	0.39664	0.35065	0.33436	0.28949	0.30369	0.30524
Luxembourg		0	0	0	0	0	0	0	0	0	0	0	0	0	0	0	0	0	0	0	0	0	0	0	0	0	0	0	0	0	0	0	0
Macedonia		--	--	--	--	--	--	--	--	--	--	--	--	0	0	0	0	0	0	0	0	0	0	0	0	0	0	0	0	0	0	0	0
Malta		0	0	0	0	0	0	0	0	0	0	0	0	0	0	0	0	0	0	0	0	0	0	0	0	0	0	0	0	0	0	0	0
Montenegro		--	--	--	--	--	--	--	--	--	--	--	--	--	--	--	--	--	--	--	--	--	--	--	--	--	--	0	0	0	0	0	0
Netherlands		3.03763	2.81982	2.40052	2.55337	2.57435	2.69	2.46723	2.47424	2.18643	2.38984	2.40754	2.72134	2.73328	2.78215	2.63926	2.66484	3.01253	2.6708	2.53949	2.36793	2.2879	2.4558	2.39237	2.30144	2.71352	2.47869	2.44306	2.40481	2.6468	2.49303	2.80202	2.55169
Norway		1.00437	1.0163	0.97477	0.98702	1.04022	1.03151	1.07082	1.13077	1.141	1.17805	1.06482	1.05427	1.13555	1.06265	1.15794	1.20625	1.60549	1.79434	1.77187	1.90419	2.02246	2.09763	2.57882	2.8926	3.17548	3.29976	3.31015	3.37366	3.73446	3.90209	3.99987	3.80729
Poland		0.20029	0.17814	0.16408	0.16043	0.17627	0.18217	0.16541	0.16625	0.16486	0.15267	0.10513	0.11673	0.11283	0.14431	0.13657	0.13973	0.1385	0.14123	0.14315	0.13684	0.14611	0.15393	0.15744	0.15914	0.17408	0.17219	0.17001	0.1715	0.16265	0.16209	0.16273	0.16965
Portugal		0	0	0	0	0	0	0	0	0	0	0	0	0	0	0	0	0	0	0	0	0	0	0	0	0	0	0	0	0	0	0	0
Romania		1.284	1.3268	1.4445	1.498	1.43166	1.35997	1.4338	1.40919	1.3696	1.20919	1.07107	0.88388	0.78392	0.74511	0.69113	0.68061	0.63109	0.61018	0.51251	0.49897	0.47788	0.50248	0.46828	0.43351	0.41505	0.41112	0.44696	0.43009	0.40128	0.3816	0.37212	0.37282
Serbia		--	--	--	--	--	--	--	--	--	--	--	--	--	--	--	--	--	--	--	--	--	--	--	--	--	--	0.00702	0.00351	0.00351	0.00667	0.01229	0.01825
Slovakia		--	--	--	--	--	--	--	--	--	--	--	--	--	0.00868	0.01001	0.01165	0.01065	0.0098	0.00881	0.00722	0.00586	0.00664	0.0064	0.00734	0.00626	0.00557	0.00776	0.00479	0.00385	0.00386	0.00389	0.00427
Slovenia		--	--	--	--	--	--	--	--	--	--	--	--	0.00055	0.00068	0.00034	0.00034	0.00037	0.00049	0.00033	0	0	0	0	0.00019	0.00019	0.00019	0.00015	0.00011	0.00011	0.00011	0.00026	8e-05
Spain		0	0	0	0.00278	0.00881	0.0101	0.01494	0.02858	0.03543	0.0627	0.05586	0.05244	0.04803	0.02627	0.00796	0.01673	0.01878	0.00718	0.00451	0.00577	0.00618	0.01968	0.01951	0.0082	0.01293	0.00603	0.00263	0.00069	0.00062	0.00054	0.00226	0.00201
Sweden		0	0	0	0	0	0	0	0	0	0	0	0	0	0	0	0	0	0	0	0	0	0	0	0	0	0	0	0	0	0	0	0
Switzerland		0	0	0	0	0	0.00104	0.00101	0.00032	0.00027	0.00016	0.00013	0.00011	0.0001	9e-05	4e-05	0	0	0	0	0	0	0	0	0	0	0	0	0	0	0	0	0
Turkey		0	0	0.00103	0.00258	0.00145	0.00206	0.01646	0.01029	0.00308	0.00617	0.0077	0.00737	0.00719	0.00726	0.00722	0.00661	0.00748	0.00919	0.02051	0.02654	0.0232	0.01133	0.01372	0.02033	0.02498	0.03256	0.03285	0.03242	0.03696	0.02486	0.02476	0.02757
United Kingdom		1.38121	1.37779	1.41801	1.45623	1.41599	1.57223	1.64867	1.73441	1.67036	1.63403	1.80487	2.00901	2.04305	2.40103	2.57209	2.80686	3.34494	3.19211	3.33551	3.69161	4.05139	3.94392	3.90704	3.87187	3.65164	3.32998	3.0218	2.71924	2.62404	2.24156	2.13735	1.65122
Armenia		--	--	--	--	--	--	--	--	--	--	--	--	0	0	0	0	0	0	0	0	0	0	0	0	0	0	0	0	0	0	0	0
Azerbaijan		--	--	--	--	--	--	--	--	--	--	--	--	0.2884	0.25143	0.2359	0.24289	0.24773	0.22037	0.20669	0.22185	0.20928	0.2115	0.18715	0.18751	0.18401	0.21375	0.25048	0.39567	0.61515	0.59965	0.61247	0.65595
Belarus		--	--	--	--	--	--	--	--	--	--	--	--	0.01062	0.01062	0.01062	0.01098	0.01098	0.00732	0.00806	0.00769	0.00736	0.00732	0.00696	0.00586	0.0066	0.0063	0.00623	0.00586	0.00557	0.00549	0.00806	0.00806
Estonia		--	--	--	--	--	--	--	--	--	--	--	--	0	0	0	0	0	0	0	0	0	0	0	0	0	0	0	0	0	0	0	0
Former U.S.S.R.		15.9848	16.4136	17.6623	18.908	21.4078	23.4336	24.8241	26.0173	27.899	28.8416	29.5303	28.9665	--	--	--	--	--	--	--	--	--	--	--	--	--	--	--	--	--	--	--	--
Georgia		--	--	--	--	--	--	--	--	--	--	--	--	0.00074	0	0	0	0	0.00222	0.00222	0.00222	0.00222	0.00222	0.00047	0.00073	0.00071	0.00051	0.00034	0.00034	0.00034	0.00034	0.00034	0
Kazakhstan		--	--	--	--	--	--	--	--	--	--	--	--	0.29949	0.24773	0.16639	0.17712	0.15678	0.22555	0.20336	0.17008	0.32908	0.37271	0.48437	0.26607	0.33163	0.35827	0.36385	0.36859	0.42438	0.4141	0.32703	0.42728
Kyrgyzstan		--	--	--	--	--	--	--	--	--	--	--	--	0.00365	0.00146	0.00128	0.00129	0.00089	0.00067	0.00052	0.00037	0.00048	0.00059	0.00037	0.001	0.00107	0.00111	0.00096	0.00068	0.00111	0.00057	0.00046	0.00037
Latvia		--	--	--	--	--	--	--	--	--	--	--	--	0	0	0	0	0	0	0	0	0	0	0	0	0	0	0	0	0	0	0	0
Lithuania		--	--	--	--	--	--	--	--	--	--	--	--	0	0	0	0	0	0	0	0	0	0	0	0	0	0	0	0	0	0	0	0
Moldova		--	--	--	--	--	--	--	--	--	--	--	--	0	0	0	0	0	0	0	0	0	0	0	0	0	0	0	0	0	0	0	0
Russia		--	--	--	--	--	--	--	--	--	--	--	--	22.7967	21.9886	21.6219	21.1734	20.0435	19.0707	19.7299	19.7691	19.509	19.395	19.8617	20.692	21.537	21.7762	22.3015	22.1566	22.0744	19.8049	22.0959	24.3016
Tajikistan		--	--	--	--	--	--	--	--	--	--	--	--	0.0037	0	0.00122	0.00144	0.00104	0.00148	0.00222	0.00222	0.00148	0.00185	0.00074	0.00148	0.00144	0.00148	0.0013	0.00072	0.00108	0.00137	0.00148	0.00068
Turkmenistan		--	--	--	--	--	--	--	--	--	--	--	--	2.11495	2.39597	1.3163	1.19428	1.36807	0.94286	0.48807	0.82454	1.71933	1.78219	1.97815	2.18521	2.16561	2.25154	2.25869	2.46169	2.51958	1.36343	1.61897	2.36591
Ukraine		--	--	--	--	--	--	--	--	--	--	--	--	0.76244	0.70043	0.66394	0.64902	0.67294	0.66924	0.66924	0.66185	0.66555	0.67294	0.68034	0.72101	0.70992	0.69676	0.70035	0.70035	0.71112	0.72765	0.69532	0.71112
Uzbekistan		--	--	--	--	--	--	--	--	--	--	--	--	1.53415	1.61302	1.69187	1.72394	1.72394	1.76704	1.96816	1.99689	2.02563	2.26626	2.07232	2.06445	2.14989	2.14379	2.25333	2.34129	2.42788	2.20549	2.15891	2.2641
Bahrain		0.1047	0.12564	0.13611	0.14658	0.13925	0.17171	0.18846	0.22668	0.19042	0.19485	0.21464	0.24395	0.19671	0.24477	0.23996	0.23996	0.24292	0.29469	0.30652	0.31096	0.31687	0.32908	0.34978	0.3557	0.3605	0.38579	0.40812	0.42433	0.44702	0.44955	0.45999	0.45459
Iran		0.264	0.22176	0.264	0.32736	0.50266	0.6336	0.56602	0.59664	0.74727	0.82946	0.88387	0.96941	0.93232	1.00951	1.18591	1.31642	1.49954	1.75275	1.86463	2.15551	2.24651	2.46131	2.79695	3.0207	3.12885	3.85979	4.05035	4.17305	4.33713	5.26561	5.45032	5.66102
Iraq		0.06491	0.02403	0.02513	0.01885	0.02094	0.02408	0.04712	0.13862	0.21186	0.22554	0.15495	0.04083	0.10575	0.09429	0.1172	0.11721	0.1198	0.11277	0.10908	0.11758	0.11647	0.10205	0.08726	0.04067	0.06471	0.05223	0.06484	0.05259	0.06772	0.04135	0.04683	0.0317
Israel		0.0052	0.00519	0.00312	0.00208	0.00208	0.00208	0.00145	0.00218	0.00147	0.00147	0.0011	0.0011	0.00079	0.0011	0.0011	0.00074	0.00073	0.00073	0.00073	0.00035	0.00037	0.00037	0.00035	0.00071	0.02752	0.0265	0.03474	0.04082	0.05157	0.04226	0.0555	0.0931
Jordan		0	0	0	0	0	0	0	0	0	0.00296	0.00481	0.00481	0.00555	0.00739	0.01035	0.01072	0.00998	0.01072	0.01035	0.01035	0.01072	0.01072	0.01146	0.01146	0.01146	0.01009	0.01153	0.00901	0.00756	0.00792	0.00792	0.00828
Kuwait		0.25547	0.1047	0.1047	0.12983	0.15077	0.14658	0.18113	0.196	0.24081	0.30171	0.19369	0.01885	0.09687	0.2004	0.22074	0.22074	0.34387	0.34276	0.33277	0.31946	0.35496	0.31429	0.2958	0.33647	0.35866	0.44306	0.44702	0.43442	0.45747	0.37891	0.42264	0.48748
Lebanon		0	0	0	0	0	0	0	0	0	0	0	0	0	0	0	0	0	0	0	0	0	0	0	0	0	0	0	0	0	0	0	0
Oman		0.02932	0.03455	0.04293	0.0534	0.04921	0.05759	0.07329	0.08355	0.07653	0.10317	0.10365	0.12983	0.12239	0.14642	0.15714	0.15419	0.15234	0.1845	0.25919	0.20669	0.33684	0.51654	0.55462	0.5842	0.63597	0.71286	0.85407	0.86595	0.86653	0.89207	0.97618	0.95528
Palestinian Territories		--	--	--	--	--	--	--	--	--	--	--	--	--	--	--	--	--	0	0	0	0	0	0	0	0	0	0	0	0	0	0	0
Qatar		0.19265	0.16454	0.19474	0.18228	0.21882	0.19998	0.20207	0.20741	0.21668	0.22518	0.28897	0.34342	0.41966	0.49916	0.49915	0.49916	0.50655	0.64336	0.72397	0.81529	1.07597	0.99832	1.09076	1.16101	1.4483	1.79696	1.98921	2.47965	3.02035	3.50368	3.7797	5.22727
Saudi Arabia		0.3497	0.5905	0.45022	0.43765	0.64914	0.74965	0.93183	0.99078	1.0759	1.10185	1.12762	1.18311	1.25714	1.3274	1.39394	1.40652	1.52854	1.67644	1.73116	1.70824	1.84172	1.98518	2.09647	2.22071	2.42851	2.56616	2.64612	2.68071	2.89755	2.82587	3.15763	3.32333
Syria		0.01635	0.00849	0.00866	0.00847	0.00866	0.00481	0.00866	0.02107	0.01733	0.03398	0.09909	0.11929	0.1223	0.1257	0.12909	0.09988	0.13657	0.15492	0.19534	0.2052	0.20724	0.18991	0.25143	0.25328	0.26252	0.21801	0.22337	0.21443	0.21086	0.23266	0.3195	0.28126
United Arab Emirates		0.2094	0.24081	0.2094	0.28269	0.36017	0.50675	0.56224	0.71395	0.69102	0.84969	0.81666	0.95905	1.07079	0.98081	0.95469	1.15804	1.24975	1.34256	1.37066	1.40652	1.41909	1.45533	1.60434	1.6561	1.71156	1.73745	1.804	1.86131	1.85761	1.80496	1.89607	1.93408
Yemen		0	0	0	0	0	0	0	0	0	0	0	0	0	0	0	0	0	0	0	0	0	0	0	0	0	0	0	0	0	0.03002	0.2402	0.37031
Algeria		0.48498	0.91096	1.11156	1.55052	1.6048	1.6048	1.5694	1.79891	1.92898	2.0169	2.10866	2.28094	2.32528	2.24444	2.13193	2.42112	2.47277	2.74222	2.93525	3.24091	3.31295	3.14102	3.15415	3.21186	3.18997	3.55155	3.47056	3.37612	3.4429	3.24076	3.36748	3.29413
Angola		0.00961	0.00925	0.01047	0.01298	0.01256	0.01361	0.01466	0.01665	0.01849	0.0159	0.01989	0.02094	0.02108	0.02071	0.01922	0.0207	0.02071	0.02108	0.02145	0.02071	0.02108	0.0196	0.02292	0.02403	0.02773	0.02341	0.02449	0.0299	0.02449	0.02485	0.02644	0.02709
Benin		0	0	0	0	0	0	0	0	0	0	0	0	0	0	0	0	0	0	0	0	0	0	0	0	0	0	0	0	0	0	0	0
Botswana		0	0	0	0	0	0	0	0	0	0	0	0	0	0	0	0	0	0	0	0	0	0	0	0	0	0	0	0	0	0	0	0
Burkina Faso		0	0	0	0	0	0	0	0	0	0	0	0	0	0	0	0	0	0	0	0	0	0	0	0	0	0	0	0	0	0	0	0
Burundi		0	0	0	0	0	0	0	0	0	0	0	0	0	0	0	0	0	0	0	0	0	0	0	0	0	0	0	0	0	0	0	0
Cameroon		0	0	0	0	0	0	0	0	0	0	0	0	0	0	0	0	0	0	0	0	0	0	0	0	0	0	0.00072	0.00072	0.00072	0.00072	0.00756	0.0054
Cape Verde		0	0	0	0	0	0	0	0	0	0	0	0	0	0	0	0	0	0	0	0	0	0	0	0	0	0	0	0	0	0	0	0
Central African Republic		0	0	0	0	0	0	0	0	0	0	0	0	0	0	0	0	0	0	0	0	0	0	0	0	0	0	0	0	0	0	0	0
Chad		0	0	0	0	0	0	0	0	0	0	0	0	0	0	0	0	0	0	0	0	0	0	0	0	0	0	0	0	0	0	0	0
Comoros		0	0	0	0	0	0	0	0	0	0	0	0	0	0	0	0	0	0	0	0	0	0	0	0	0	0	0	0	0	0	0	0
Congo (Brazzaville)		0.00052	0.00063	0.00063	0.00073	0.00073	0.00209	0.00042	0.00209	0	0	0	0	0	0	0	0	0	0	0	0	0	0	0	0	0	0.00432	0.00648	0.01045	0.01333	0.01909	0.0335	0.04142
Congo (Kinshasa)		0	0	0	0	0	0	0	0	0	0	0	0	0	0	0	0	0	0	0	0	0	0	0	0	0	0	0	0	0	0	0	0
Cote dIvoire (IvoryCoast)		0	0	0	0	0	0	0	0	0	0	0	0	0	0	0	0.00148	0.02034	0.02218	0.02958	0.04955	0.04992	0.04992	0.04737	0.04737	0.04596	0.04596	0.04596	0.05303	0.05656	0.05656	0.05303	0.05303
Djibouti		0	0	0	0	0	0	0	0	0	0	0	0	0	0	0	0	0	0	0	0	0	0	0	0	0	0	0	0	0	0	0	0
Egypt		0.03141	0.05235	0.09842	0.11873	0.14972	0.18323	0.2094	0.23222	0.25585	0.28618	0.29944	0.33609	0.36553	0.41745	0.44332	0.45959	0.49546	0.49916	0.50803	0.54242	0.67664	0.90773	0.92437	1.10813	1.2039	1.53091	1.62816	1.67499	2.12418	2.25818	2.20919	2.20666
Equatorial Guinea		0	0	0	0	0	0	0	0	0	0	0	0	0	0	0	0	0	0	0.00074	0.00074	0.00111	0.00111	0.04696	0.04807	0.0037	0.04807	0.04807	0.10797	0.22	0.23183	0.24182	0.25439
Eritrea		--	--	--	--	--	--	--	--	--	--	--	--	--	--	0	0	0	0	0	0	0	0	0	0	0	0	0	0	0	0	0	0
Ethiopia		0	0	0	0	0	0	0	0	0	0	0	0	0	0	0	0	0	0	0	0	0	0	0	0	0	0	0	0	0	0	0	0
Gabon		0.00259	0.00222	0.00209	0.00555	0.00555	0.00209	0.00105	0.00429	0.0037	0.00333	0.00314	0.00372	0.0037	0.0037	0.0037	0.0037	0.0037	0.0037	0.0037	0.0037	0.00296	0.00296	0.00333	0.00333	0.0037	0.00357	0.00357	0.00286	0.00286	0.00286	0.00286	0.0025
Gambia, The		0	0	0	0	0	0	0	0	0	0	0	0	0	0	0	0	0	0	0	0	0	0	0	0	0	0	0	0	0	0	0	0
Ghana		0	0	0	0	0	0	0	0	0	0	0	0	0	0	0	0	0	0	0	0	0	0	0	0	0	0	0	0	0	0	0	0
Guinea		0	0	0	0	0	0	0	0	0	0	0	0	0	0	0	0	0	0	0	0	0	0	0	0	0	0	0	0	0	0	0	0
Guinea-Bissau		0	0	0	0	0	0	0	0	0	0	0	0	0	0	0	0	0	0	0	0	0	0	0	0	0	0	0	0	0	0	0	0
Kenya		0	0	0	0	0	0	0	0	0	0	0	0	0	0	0	0	0	0	0	0	0	0	0	0	0	0	0	0	0	0	0	0
Lesotho		0	0	0	0	0	0	0	0	0	0	0	0	0	0	0	0	0	0	0	0	0	0	0	0	0	0	0	0	0	0	0	0
Liberia		0	0	0	0	0	0	0	0	0	0	0	0	0	0	0	0	0	0	0	0	0	0	0	0	0	0	0	0	0	0	0	0
Libya		0.18846	0.11517	0.12564	0.14658	0.16961	0.18846	0.20731	0.19788	0.20335	0.22185	0.22929	0.2418	0.25038	0.23516	0.23627	0.23442	0.23738	0.24292	0.23516	0.19227	0.22185	0.2285	0.22961	0.20336	0.29802	0.40704	0.4753	0.55041	0.57274	0.57277	0.60566	0.28295
Madagascar		0	0	0	0	0	0	0	0	0	0	0	0	0	0	0	0	0	0	0	0	0	0	0	0	0	0	0	0	0	0	0	0
Malawi		0	0	0	0	0	0	0	0	0	0	0	0	0	0	0	0	0	0	0	0	0	0	0	0	0	0	0	0	0	0	0	0
Mali		0	0	0	0	0	0	0	0	0	0	0	0	0	0	0	0	0	0	0	0	0	0	0	0	0	0	0	0	0	0	0	0
Mauritania		0	0	0	0	0	0	0	0	0	0	0	0	0	0	0	0	0	0	0	0	0	0	0	0	0	0	0	0	0	0	0	0
Mauritius		0	0	0	0	0	0	0	0	0	0	0	0	0	0	0	0	0	0	0	0	0	0	0	0	0	0	0	0	0	0	0	0
Morocco		0.00259	0.00333	0.00314	0.00335	0.00209	0.00314	0.00314	0.0022	0.00222	0.00222	0.00209	0.00144	0.00089	0.00111	0.00111	0.00074	0.00074	0.00185	0.00185	0.00185	0.00185	0.00185	0.00185	0.00185	0.00185	0.00186	0.00223	0.00134	0.00223	0.00223	0.00223	0.00223
Mozambique		0	0	0	0	0	0	0	0	0	0	0	0	0	0	0	0	0	0	0.00222	0.00222	0.00222	0.00222	0.00222	0.00296	0.00296	0.0072	0.05944	0.0951	0.1059	0.09654	0.11239	0.1376
Namibia		--	--	--	--	--	--	--	--	--	--	0	0	0	0	0	0	0	0	0	0	0	0	0	0	0	0	0	0	0	0	0	0
Niger		0	0	0	0	0	0	0	0	0	0	0	0	0	0	0	0	0	0	0	0	0	0	0	0	0	0	0	0	0	0	0	0
Nigeria		0.03957	0.07957	0.05235	0.08502	0.10156	0.11308	0.12145	0.13684	0.1394	0.17378	0.13716	0.1759	0.18118	0.18672	0.16823	0.19189	0.20188	0.2163	0.21815	0.25697	0.46071	0.55092	0.52504	0.75059	0.80605	0.80688	1.02661	1.17069	1.1824	0.93023	1.04426	1.12963
Reunion		0	0	0	0	0	0	0	0	0	0	0	0	0	0	0	0	0	0	0	0	0	0	0	0	0	0	0	0	0	0	0	0
Rwanda		0	0	0	0	0	0	0	0	0	0	0	0	0	0	0	0	0	0	0	0	0	0	0	0	0	0	0	0	0	0	0	0
Saint Helena		0	0	0	0	0	0	0	0	0	0	0	0	0	0	0	0	0	0	0	0	0	0	0	0	0	0	0	0	0	0	0	0
Sao Tome and Principe		0	0	0	0	0	0	0	0	0	0	0	0	0	0	0	0	0	0	0	0	0	0	0	0	0	0	0	0	0	0	0	0
Senegal		0	0	0	0	0	0	0	0	0	0	0	0	0	0.00063	0.00127	0.00159	0.0019	0.00127	0.00127	0.00127	0.00159	0.00159	0.00159	0.00159	0.00159	0.00159	0.00159	0.00159	0.00159	0.00159	0.00063	0.00063
Seychelles		0	0	0	0	0	0	0	0	0	0	0	0	0	0	0	0	0	0	0	0	0	0	0	0	0	0	0	0	0	0	0	0
Sierra Leone		0	0	0	0	0	0	0	0	0	0	0	0	0	0	0	0	0	0	0	0	0	0	0	0	0	0	0	0	0	0	0	0
Somalia		0	0	0	0	0	0	0	0	0	0	0	0	0	0	0	0	0	0	0	0	0	0	0	0	0	0	0	0	0	0	0	0
South Africa		0	0	0	0	0	0	0	0	0	0	0	0	0.00148	0.06655	0.0721	0.07247	0.06807	0.06471	0.05361	0.05176	0.06101	0.07765	0.08504	0.0843	0.08245	0.07925	0.10446	0.05511	0.04899	0.03818	0.03494	0.04611
Sudan and South Sudan		0	0	0	0	0	0	0	0	0	0	0	0	0	0	0	0	0	0	0	0	0	0	0	0	0	0	0	0	0	0	0	0
Swaziland		0	0	0	0	0	0	0	0	0	0	0	0	0	0	0	0	0	0	0	0	0	0	0	0	0	0	0	0	0	0	0	0
Tanzania		0	0	0	0	0	0	0	0	0	0	0	0	0	0	0	0	0	0	0	0	0	0	0	0	0.0044	0.01469	0.01816	0.01909	0.02017	0.0237	0.0281	0.03098
Togo		0	0	0	0	0	0	0	0	0	0	0	0	0	0	0	0	0	0	0	0	0	0	0	0	0	0	0	0	0	0	0	0
Tunisia		0.01571	0.01724	0.02225	0.01916	0.02472	0.0173	0.01854	0.01656	0.01528	0.01572	0.01483	0.00989	0.01746	0.01534	0.01451	0.01368	0.03275	0.06882	0.07877	0.07877	0.07794	0.09328	0.08914	0.09494	0.0995	0.10365	0.10365	0.06551	0.0568	0.07504	0.08416	0.08002
Uganda		0	0	0	0	0	0	0	0	0	0	0	0	0	0	0	0	0	0	0	0	0	0	0	0	0	0	0	0	0	0	0	0
Western Sahara		0	0	0	0	0	0	0	0	0	0	0	0	0	0	0	0	0	0	0	0	0	0	0	0	0	0	0	0	0	0	0	0
Zambia		0	0	0	0	0	0	0	0	0	0	0	0	0	0	0	0	0	0	0	0	0	0	0	0	0	0	0	0	0	0	0	0
Zimbabwe		0	0	0	0	0	0	0	0	0	0	0	0	0	0	0	0	0	0	0	0	0	0	0	0	0	0	0	0	0	0	0	0
Afghanistan		0.06282	0.08271	0.08502	0.08879	0.089	0.10994	0.10994	0.10386	0.11093	0.1094	0.10889	0.01152	0.01109	0.01109	0.01109	0.00739	0.0085	0.0085	0.0085	0.0085	0.0085	0.00185	0.00185	0.00074	0.00074	0.00074	0.00074	0.00148	0.00185	0.00111	0.00518	0
American Samoa		0	0	0	0	0	0	0	0	0	0	0	0	0	0	0	0	0	0	0	0	0	0	0	0	0	0	0	0	0	0	0	0
Australia		0.32918	0.38499	0.4246	0.44397	0.46446	0.49551	0.54127	0.55519	0.57858	0.59501	0.78012	0.81249	0.86837	0.93204	1.00612	1.11495	1.14879	1.13964	1.18331	1.20461	1.25056	1.27884	1.33253	1.37517	1.41274	1.61233	1.69045	1.51665	1.57373	1.76346	1.94066	2.20641
Bangladesh		0.04705	0.05616	0.06117	0.06455	0.0894	0.0941	0.10633	0.12355	0.14123	0.15452	0.15244	0.16279	0.19407	0.2134	0.23226	0.2548	0.26137	0.26379	0.2835	0.31289	0.33536	0.35611	0.38376	0.43208	0.47003	0.50726	0.55509	0.58951	0.64857	0.71017	0.7214	0.72865
Bhutan		0	0	0	0	0	0	0	0	0	0	0	0	0	0	0	0	0	0	0	0	0	0	0	0	0	0	0	0	0	0	0	0
Brunei		0.38362	0.41586	0.39334	0.40183	0.36784	0.35813	0.3557	0.37343	0.36955	0.373	0.38605	0.31966	0.3301	0.33744	0.34314	0.38105	0.37534	0.37412	0.32982	0.34941	0.36568	0.38269	0.40118	0.42151	0.42521	0.44308	0.5317	0.51821	0.51628	0.43537	0.45464	0.4793
Burma (Myanmar)		0.01152	0.01256	0.01665	0.01958	0.02408	0.02932	0.03979	0.04209	0.03846	0.0403	0.03979	0.03692	0.03635	0.04094	0.05323	0.06105	0.05956	0.05621	0.06551	0.0543	0.10766	0.221	0.31266	0.35733	0.37966	0.48389	0.469	0.50324	0.46155	0.42954	0.44853	0.44331
Cambodia		0	0	0	0	0	0	0	0	0	0	0	0	0	0	0	0	0	0	0	0	0	0	0	0	0	0	0	0	0	0	0	0
China		0.58126	0.51795	0.43853	0.49608	0.50414	0.52601	0.55708	0.56894	0.565	0.58126	0.58471	0.60543	0.61378	0.64264	0.67759	0.69884	0.82716	0.93111	0.9547	1.03341	1.00564	1.11857	1.20455	1.26581	1.50421	1.84226	2.15956	2.55635	2.80619	3.10888	3.48412	3.79194
Cook Islands		0	0	0	0	0	0	0	0	0	0	0	0	0	0	0	0	0	0	0	0	0	0	0	0	0	0	0	0	0	0	0	0
Fiji		0	0	0	0	0	0	0	0	0	0	0	0	0	0	0	0	0	0	0	0	0	0	0	0	0	0	0	0	0	0	0	0
French Polynesia		0	0	0	0	0	0	0	0	0	0	0	0	0	0	0	0	0	0	0	0	0	0	0	0	0	0	0	0	0	0	0	0
Guam		0	0	0	0	0	0	0	0	0	0	0	0	0	0	0	0	0	0	0	0	0	0	0	0	0	0	0	0	0	0	0	0
Hawaiian Trade Zone		0	0	0	0	0	0	0	--	--	--	--	--	--	--	--	--	--	--	--	--	--	--	--	--	--	--	--	--	--	--	--	--
Hong Kong		0	0	0	0	0	0	0	0	0	0	0	0	0	0	0	0	0	0	0	0	0	0	0	0	0	0	0	0	0	0	0	0
India		0.0587	0.07366	0.09995	0.11859	0.1269	0.1516	0.20718	0.26093	0.35681	0.36278	0.45925	0.5168	0.54874	0.61214	0.68328	0.72231	0.72009	0.74127	0.78655	0.77778	0.8216	0.88003	0.95671	0.99688	1.02974	1.09182	1.12468	1.14586	1.17581	1.48582	1.91123	1.73888
Indonesia		0.71905	0.72915	0.74119	0.84569	1.14014	1.25474	1.30563	1.39498	1.52356	1.60281	1.7622	1.99554	2.10509	2.15024	2.40505	2.43894	2.59715	2.58483	2.4732	2.73149	2.43817	2.05785	2.24878	2.38659	2.21106	2.18065	2.39698	2.64026	2.69453	2.78692	3.09717	2.93512
Japan		0.08542	0.08173	0.07959	0.08107	0.08293	0.08651	0.08185	0.0843	0.08154	0.07811	0.23868	0.24775	0.24881	0.25551	0.24478	0.25331	0.24315	0.23591	0.2272	0.23016	0.23436	0.22238	0.24972	0.21289	0.22859	0.20528	0.21274	0.22456	0.21953	0.20901	0.20276	0.20926
Kiribati		0	0	0	0	0	0	0	0	0	0	0	0	0	0	0	0	0	0	0	0	0	0	0	0	0	0	0	0	0	0	0	0
Korea, North		0	0	0	0	0	0	0	0	0	0	0	0	0	0	0	0	0	0	0	0	0	0	0	0	0	0	0	0	0	0	0	0
Korea, South		0	0	0	0	0	0	0	0	0	0	0	0	0	0	0	0	0	0	0	0	0	0	0	0	0	0.01944	0.01732	0.01713	0.01748	0.02965	0.03751	0.04003
Laos		0	0	0	0	0	0	0	0	0	0	0	0	0	0	0	0	0	0	0	0	0	0	0	0	0	0	0	0	0	0	0	0
Macau		0	0	0	0	0	0	0	0	0	0	0	0	0	0	0	0	0	0	0	0	0	0	0	0	0	0	0	0	0	0	0	0
Malaysia		0.05841	0.06467	0.0582	0.15436	0.33898	0.45579	0.5507	0.57469	0.60591	0.63207	0.68212	0.77912	0.8306	0.92706	0.97169	1.07395	1.29521	1.42797	1.44284	1.49751	1.68456	1.77604	1.79612	1.93371	2.00064	2.0713	2.07725	2.21596	2.26467	2.24608	2.28587	2.29553
Maldives		0	0	0	0	0	0	0	0	0	0	0	0	0	0	0	0	0	0	0	0	0	0	0	0	0	0	0	0	0	0	0	0
Mongolia		0	0	0	0	0	0	0	0	0	0	0	0	0	0	0	0	0	0	0	0	0	0	0	0	0	0	0	0	0	0	0	0
Nauru		0	0	0	0	0	0	0	0	0	0	0	0	0	0	0	0	0	0	0	0	0	0	0	0	0	0	0	0	0	0	0	0
Nepal		0	0	0	0	0	0	0	0	0	0	0	0	0	0	0	0	0	0	0	0	0	0	0	0	0	0	0	0	0	0	0	0
New Caledonia		0	0	0	0	0	0	0	0	0	0	0	0	0	0	0	0	0	0	0	0	0	0	0	0	0	0	0	0	0	0	0	0
New Zealand		0.03652	0.04439	0.07738	0.08327	0.10541	0.1342	0.16096	0.15505	0.1698	0.17408	0.17289	0.1886	0.20008	0.17937	0.1819	0.17192	0.19595	0.20971	0.18361	0.21216	0.21393	0.23607	0.22582	0.16987	0.15285	0.13777	0.15102	0.16079	0.15166	0.15844	0.16996	0.15466
Niue		0	0	0	0	0	0	0	0	0	0	0	0	0	0	0	0	0	0	0	0	0	0	0	0	0	0	0	0	0	0	0	0
Pakistan		0.2789	0.30771	0.34515	0.33345	0.33064	0.34091	0.36613	0.39153	0.41527	0.44364	0.45019	0.49876	0.51437	0.54452	0.5858	0.60328	0.65045	0.65243	0.66298	0.73225	0.79921	0.72334	0.70439	0.77425	0.8399	0.94304	1.10593	1.12675	1.16349	1.18523	1.2134	1.1987
Papua New Guinea		0	0	0	0	0	0	0	0	0	0	0	0	0.00222	0.00296	0.00185	0.0037	0.00481	0.00407	0.00407	0.00407	0.00407	0.00407	0.00407	0.00518	0.00518	0.0037	0.00518	0.00503	0.00481	0.0037	0.00407	0.0037
Philippines		0	0	0	0	0	0	0	0	0	0	0	0	0	0	0	0.00034	0.00035	0.00035	0.00035	0.00035	0.00035	0.0069	0.07254	0.10518	0.10518	0.10528	0.07987	0.10528	0.10673	0.11436	0.10564	0.10528
Samoa		0	0	0	0	0	0	0	0	0	0	0	0	0	0	0	0	0	0	0	0	0	0	0	0	0	0	0	0	0	0	0	0
Singapore		0	0	0	0	0	0	0	0	0	0	0	0	0	0	0	0	0	0	0	0	0	0	0	0	0	0	0	0	0	0	0	0
Solomon Islands		0	0	0	0	0	0	0	0	0	0	0	0	0	0	0	0	0	0	0	0	0	0	0	0	0	0	0	0	0	0	0	0
Sri Lanka		0	0	0	0	0	0	0	0	0	0	0	0	0	0	0	0	0	0	0	0	0	0	0	0	0	0	0	0	0	0	0	0
Taiwan		0.04502	0.05553	0.04921	0.04921	0.05444	0.05235	0.04188	0.04523	0.02514	0.05251	0.08376	0.03435	0.03108	0.02931	0.03249	0.03355	0.03214	0.03284	0.03143	0.03143	0.03143	0.03002	0.03284	0.02931	0.03002	0.02825	0.01519	0.01342	0.01095	0.01095	0.00918	0.01024
Thailand		0	0.04	0.047	0.0569	0.07	0.128	0.112	0.1315	0.19281	0.18211	0.208	0.236	0.249	0.31042	0.34184	0.36763	0.41852	0.52548	0.55549	0.61104	0.64244	0.64417	0.68937	0.75078	0.78964	0.81772	0.83911	0.89707	0.9923	1.06545	1.25141	1.27626
Timor-Leste (East Timor)		--	--	--	--	--	--	--	--	--	--	--	--	--	--	--	--	--	--	--	--	--	--	--	0	0	0	0	0	0	0	0	0
Tonga		0	0	0	0	0	0	0	0	0	0	0	0	0	0	0	0	0	0	0	0	0	0	0	0	0	0	0	0	0	0	0	0
U.S. Pacific Islands		0	0	0	0	0	0	0	0	0	0	0	0	0	0	0	0	0	0	0	0	0	0	0	0	0	0	0	0	0	0	0	0
Vanuatu		0	0	0	0	0	0	0	0	0	0	0	0	0	0	0	0	0	0	0	0	0	0	0	0	0	0	0	0	0	0	0	0
Vietnam		0	0.00036	0.00232	0.00232	0.00218	0.00145	0.00145	0.00145	0.00109	0.00109	0.00145	0.00253	0.00761	0.00915	0.00915	0.02597	0.03037	0.00841	0.02561	0.03659	0.04207	0.04756	0.08269	0.09878	0.10976	0.14635	0.20854	0.21586	0.25537	0.2594	0.30037	0.28208
Wake Island		0	0	0	0	0	0	0	0	0	0	0	0	0	0	0	0	0	0	0	0	0	0	0	0	0	0	0	0	0	0	0	0
