# Supplementary material
Source: MDPI journal article supplement (https://www.mdpi.com/1099-4300/15/12/5565)
Supplement: s2 [file s2 › Sources/Raw Data/Population_(Millions).xls]

## Sheet: Data3
Table: Population (Millions)
		1980	1981	1982	1983	1984	1985	1986	1987	1988	1989	1990	1991	1992	1993	1994	1995	1996	1997	1998	1999	2000	2001	2002	2003	2004	2005	2006	2007	2008	2009	2010	2011
North America		320.276	324.447	328.62	332.725	336.721	340.748	344.895	349.078	353.294	357.685	362.447	367.707	373.291	378.742	383.917	388.972	393.943	398.972	403.856	408.603	413.315	417.72	421.874	425.844	430.029	434.236	438.616	442.999	447.393	451.602	455.691	459.479
Bermuda		0.05473	0.05491	0.05517	0.05551	0.05585	0.05618	0.05651	0.05683	0.05717	0.05749	0.05778	0.0581	0.0587	0.05924	0.05975	0.06029	0.06087	0.06145	0.06198	0.06251	0.06306	0.06361	0.06418	0.06476	0.06534	0.06591	0.06644	0.06692	0.06739	0.06784	0.06827	0.06868
Canada		24.5933	24.9	25.2019	25.4563	25.7018	25.9416	26.2038	26.5497	26.8948	27.3793	27.7906	28.1179	28.5449	28.9533	29.3308	29.6905	30.0263	30.3056	30.5517	30.8203	31.0996	31.3767	31.641	31.8893	32.1348	32.3864	32.6567	32.936	33.2127	33.4872	33.7597	34.0306
Greenland		0.05021	0.05103	0.05166	0.05211	0.05263	0.05315	0.05364	0.0541	0.05485	0.05541	0.05563	0.05554	0.05549	0.05564	0.05592	0.05619	0.05634	0.05651	0.05661	0.0567	0.05689	0.05713	0.05736	0.05754	0.0577	0.05778	0.05764	0.05753	0.05756	0.0576	0.05764	0.05767
Mexico		68.3475	69.9693	71.6409	73.3629	75.0801	76.7672	78.4424	80.1225	81.7818	83.3668	84.9137	86.488	88.111	89.7491	91.3379	92.8804	94.3986	95.8952	97.3251	98.6169	99.9266	101.247	102.48	103.718	104.96	106.203	107.45	108.701	109.955	111.212	112.469	113.724
Saint Pierre and Miquelon		0.00599	0.00601	0.00605	0.00607	0.00611	0.00616	0.00621	0.00625	0.00628	0.00631	0.00632	0.00633	0.00636	0.00638	0.0064	0.0064	0.00641	0.00642	0.00642	0.00643	0.00641	0.00637	0.00633	0.00629	0.00625	0.0062	0.00615	0.0061	0.00605	0.006	0.00594	0.00589
United States		227.225	229.466	231.664	233.792	235.825	237.924	240.133	242.289	244.499	246.819	249.623	252.981	256.514	259.919	263.126	266.278	269.394	272.647	275.854	279.04	282.162	284.969	287.625	290.108	292.805	295.517	298.38	301.231	304.094	306.772	309.33	311.592
Central & South America		290.992	297.285	303.678	310.221	316.806	323.406	330.007	336.725	343.46	350.122	356.817	363.308	369.68	376.051	382.551	388.938	395.168	401.32	407.402	413.285	418.978	424.57	430.117	435.719	441.356	446.916	452.318	457.586	462.786	467.908	472.685	477.593
Antarctica		NA	NA	NA	NA	NA	NA	NA	NA	NA	NA	NA	NA	NA	NA	NA	NA	NA	NA	NA	NA	NA	NA	NA	NA	NA	NA	NA	NA	NA	NA	NA	NA
Antigua and Barbuda		0.06855	0.06826	0.06801	0.06562	0.06447	0.0644	0.0644	0.06442	0.06443	0.06439	0.06416	0.06403	0.06518	0.06633	0.06749	0.06871	0.07006	0.07145	0.07278	0.07402	0.07535	0.07673	0.07794	0.07907	0.08019	0.08128	0.08234	0.08343	0.08452	0.08563	0.08675	0.08788
Argentina		28.3698	28.8481	29.3299	29.7935	30.2306	30.6718	31.145	31.6246	32.0993	32.5716	33.0356	33.5044	33.9669	34.4072	34.8469	35.2738	35.683	36.1022	36.5179	36.9234	37.3357	37.6942	37.9995	38.3369	38.7418	39.1813	39.6144	40.0488	40.482	40.9136	41.3432	41.7697
Aruba		--	--	--	--	--	--	0.0598	0.05918	0.0595	0.06069	0.06303	0.0663	0.06948	0.07407	0.07785	0.07996	0.08307	0.08621	0.0882	0.08926	0.09	0.09097	0.09217	0.09372	0.09546	0.09698	0.0985	0.10002	0.10154	0.10307	0.10459	0.10611
Bahamas, The		0.20976	0.21345	0.21713	0.22086	0.22462	0.2282	0.23143	0.23448	0.23771	0.24124	0.24513	0.24931	0.25356	0.25766	0.26151	0.26518	0.26888	0.27256	0.27599	0.27931	0.28259	0.28569	0.28858	0.29135	0.29406	0.29671	0.29929	0.30197	0.30473	0.30755	0.31043	0.31331
Barbados		0.25197	0.25236	0.25348	0.25485	0.25611	0.25725	0.25827	0.25912	0.25995	0.26109	0.26226	0.26334	0.2646	0.2657	0.26663	0.26767	0.26881	0.27006	0.27129	0.2725	0.27368	0.27491	0.27622	0.27755	0.27882	0.28004	0.28121	0.28236	0.2835	0.28459	0.28565	0.28671
Belize		0.14442	0.14921	0.1533	0.15685	0.16081	0.16556	0.17124	0.17635	0.1814	0.18643	0.19087	0.19575	0.20082	0.20609	0.21155	0.21717	0.22297	0.22895	0.23513	0.24148	0.248	0.25464	0.2613	0.26796	0.27462	0.28129	0.28795	0.29461	0.30127	0.3079	0.31452	0.32112
Bolivia		5.4413	5.54522	5.64222	5.73743	5.83429	5.93494	6.04135	6.15637	6.28316	6.42314	6.5739	6.73148	6.89345	7.05434	7.21481	7.37487	7.5344	7.69515	7.8589	8.02556	8.1951	8.36745	8.54249	8.71906	8.89597	9.07294	9.24971	9.42594	9.60126	9.77525	9.94742	10.1187
Brazil		121.064	123.962	126.89	129.821	132.793	135.733	138.567	141.352	144.096	146.798	149.409	151.944	154.461	156.964	159.448	161.911	164.369	166.84	169.322	171.815	174.315	176.79	179.205	181.553	183.828	186.02	188.131	190.167	192.13	194.019	195.834	197.595
Cayman Islands		0.01708	0.0179	0.01852	0.01909	0.02002	0.02085	0.02144	0.02207	0.0245	0.02507	0.02636	0.02751	0.02868	0.03001	0.0313	0.03249	0.03368	0.03487	0.03606	0.03725	0.03844	0.03962	0.0408	0.04199	0.04316	0.04434	0.04552	0.04669	0.04786	0.04904	0.05021	0.05138
Chile		10.9985	11.1759	11.3689	11.5677	11.7617	11.9521	12.1449	12.3445	12.5546	12.7743	13.0078	13.2506	13.4891	13.7224	13.9521	14.1725	14.3833	14.591	14.7941	14.9905	15.1746	15.3477	15.5148	15.6752	15.8287	15.9792	16.1304	16.283	16.441	16.6019	16.7599	16.915
Colombia		26.6313	27.2149	27.826	28.455	29.0955	29.7476	30.4104	31.0853	31.7709	32.4609	33.1472	33.8322	34.5203	35.2056	35.8876	36.5318	37.0979	37.6199	38.1326	38.5639	38.9104	39.3124	39.8049	40.351	40.9222	41.4878	42.0463	42.5973	43.1411	43.6774	44.2053	44.7255
Costa Rica		2.29912	2.35729	2.42437	2.49435	2.5676	2.64431	2.72338	2.79934	2.87412	2.94989	3.02327	3.09302	3.16836	3.25653	3.3512	3.44474	3.536	3.62532	3.71374	3.80017	3.88258	3.95621	4.02095	4.08382	4.1467	4.20869	4.26977	4.33113	4.39324	4.45505	4.51622	4.57656
Cuba		9.65298	9.71198	9.78922	9.88115	9.9733	10.0647	10.1427	10.2142	10.3017	10.4027	10.5067	10.6025	10.6813	10.7438	10.798	10.8475	10.8909	10.9288	10.9738	11.0259	11.0718	11.1038	11.1316	11.1672	11.1952	11.1984	11.1798	11.1601	11.1349	11.1097	11.0984	11.0873
Dominica		0.07389	0.07352	0.07381	0.07429	0.07399	0.07311	0.07238	0.07182	0.07134	0.07051	0.07001	0.07012	0.07028	0.07042	0.07092	0.07142	0.071	0.07028	0.07004	0.07035	0.07082	0.07121	0.07153	0.07173	0.07193	0.07212	0.07225	0.07238	0.07251	0.07266	0.07281	0.07297
Dominican Republic		5.69686	5.83171	5.96874	6.10582	6.24155	6.37855	6.51682	6.65696	6.79877	6.94187	7.08362	7.2248	7.36293	7.49428	7.62413	7.75897	7.89898	8.03994	8.18221	8.3252	8.46891	8.61355	8.7569	8.89658	9.03239	9.16447	9.29504	9.42623	9.55818	9.69079	9.82382	9.95665
Ecuador		7.9205	8.14108	8.36585	8.59349	8.82583	9.06166	9.30108	9.54516	9.79412	10.0482	10.318	10.4299	10.5538	10.7537	11.0125	11.2656	11.5265	11.7925	12.0506	12.2683	12.4458	12.6291	12.8273	13.0742	13.3684	13.6623	13.9171	14.135	14.3545	14.5731	14.7906	15.0073
El Salvador		4.57041	4.51972	4.47992	4.52671	4.59375	4.67105	4.75832	4.85014	4.93899	5.02478	5.10982	5.19624	5.28601	5.33415	5.3952	5.47983	5.56411	5.63681	5.71157	5.78837	5.84982	5.8837	5.90183	5.91985	5.93512	5.95622	5.97089	5.98175	6.00645	6.0306	6.05206	6.07177
Falkland Islands (Islas Malvinas)		0.002	0.002	0.002	0.002	0.002	0.002	0.002	0.002	0.002	0.002	0.002	0.002	0.002	0.002	0.002	0.002	0.002	0.00243	0.0026	0.0028	0.00285	0.0029	0.00293	0.00297	0.00297	0.00297	0.00297	0.00297	0.00314	0.00314	0.00314	0.00314
French Guiana		0.07	0.07	0.07	0.08	0.08	0.09	0.09	0.1	0.11	0.11	0.12	0.12	0.13	0.13	0.14	0.15	0.15	0.16	0.17	0.17436	0.17883	0.18342	0.18812	0.19294	0.19789	0.20296	0.20817	0.2135	0.21898	0.22459	0.23035	0.23625
Grenada		0.09016	0.09235	0.09241	0.09253	0.09274	0.09306	0.09355	0.09406	0.09429	0.0943	0.0942	0.09406	0.09465	0.09576	0.09675	0.09774	0.09865	0.09957	0.10039	0.10099	0.10161	0.10229	0.10284	0.10332	0.10397	0.10459	0.1052	0.10589	0.10656	0.1072	0.10782	0.10842
Guadeloupe		0.337	0.339	0.341	0.345	0.35	0.354	0.358	0.363	0.367	0.38	0.39	0.4	0.40332	0.40666	0.41004	0.41344	0.41687	0.42033	0.42382	0.42733	0.43088	0.43445	0.43806	0.44169	0.44535	0.44905	0.45278	0.45676	0.46078	0.46483	0.46892	0.47305
Guatemala		6.64959	6.82868	6.98272	7.18865	7.38034	7.58084	7.82	8.15988	8.49582	8.73058	8.96555	9.21325	9.36708	9.52288	9.77911	10.0278	10.268	10.4961	10.7081	10.9034	11.085	11.2843	11.5067	11.7252	11.94	12.1826	12.4548	12.7281	13.0022	13.2765	13.5504	13.8245
Guyana		0.75935	0.76193	0.76286	0.76216	0.76207	0.76225	0.76338	0.76496	0.76655	0.7686	0.77153	0.77053	0.7673	0.7669	0.76765	0.76916	0.76889	0.76841	0.7726	0.78005	0.78556	0.78626	0.78273	0.77981	0.77948	0.7765	0.77021	0.76381	0.75806	0.75294	0.74849	0.74477
Haiti		5.5077	5.62287	5.74042	5.86229	5.98898	6.11992	6.25386	6.38967	6.51878	6.65269	6.79794	6.92983	7.06997	7.23284	7.39969	7.5704	7.74067	7.90968	8.08056	8.24971	8.41289	8.56858	8.72319	8.88367	9.04569	9.20467	9.35756	9.50049	9.63908	9.77797	9.64892	9.71993
Honduras		3.40247	3.54306	3.67004	3.79614	3.93299	4.07731	4.22692	4.37326	4.51498	4.65602	4.79403	4.93323	5.07988	5.23262	5.38981	5.55079	5.71284	5.87503	6.0391	6.19088	6.3594	6.52698	6.69369	6.86205	7.02944	7.19307	7.35516	7.51621	7.67585	7.8337	7.98942	8.14356
Jamaica		2.2288	2.25837	2.29831	2.30639	2.31306	2.31818	2.32255	2.32587	2.32943	2.33666	2.34701	2.35772	2.37785	2.40685	2.43644	2.46907	2.50125	2.53118	2.56043	2.58887	2.61563	2.64051	2.66498	2.68915	2.713	2.73651	2.75961	2.78222	2.80433	2.82593	2.84723	2.86838
Martinique		0.326	0.3272	0.32857	0.33229	0.33606	0.33987	0.34372	0.34762	0.35156	0.35554	0.35957	0.36194	0.36432	0.36672	0.36913	0.37156	0.374	0.37646	0.37894	0.38143	0.385	0.38709	0.3892	0.39131	0.39344	0.39558	0.39773	0.4	0.40199	0.40399	0.406	0.40914
Montserrat		0.01177	0.01179	0.01166	0.01156	0.01144	0.01132	0.01121	0.01109	0.01097	0.01085	0.01073	0.01061	0.0105	0.01041	0.01034	0.01027	0.00795	0.00595	0.00338	0.00338	0.00395	0.00424	0.00481	0.00449	0.00496	0.00453	0.00463	0.00451	0.00508	0.0051	0.00512	0.00514
Netherlands Antilles		0.23244	0.23449	0.23757	0.24092	0.24385	0.24443	0.18433	0.18567	0.18669	0.18763	0.18879	0.19014	0.192	0.1945	0.19679	0.19891	0.20124	0.20354	0.20581	0.20802	0.21018	0.21229	0.21434	0.21632	0.21824	0.2201	0.22189	0.22365	0.22537	0.22705	0.22869	0.2305
Nicaragua		2.80303	2.89865	2.97608	3.04391	3.11424	3.18014	3.24809	3.32238	3.40356	3.49206	3.64356	3.83888	4.00651	4.15638	4.28936	4.40189	4.50278	4.59821	4.68884	4.77785	4.86617	4.95223	5.03565	5.11614	5.19339	5.26715	5.33829	5.40778	5.4755	5.54117	5.60445	5.6663
Panama		1.95957	1.9989	2.0395	2.08079	2.12346	2.16762	2.21216	2.25674	2.30168	2.3472	2.39344	2.44075	2.48923	2.53836	2.58771	2.63817	2.68979	2.74368	2.79723	2.84779	2.89951	2.95229	3.00342	3.05361	3.10418	3.15503	3.20648	3.25833	3.30968	3.36047	3.41068	3.46046
Paraguay		3.1716	3.25084	3.33837	3.43192	3.53055	3.63346	3.7399	3.84989	3.96344	4.08056	4.20049	4.32234	4.44589	4.57099	4.69758	4.82556	4.95484	5.08116	5.20018	5.31154	5.41824	5.5234	5.62689	5.72855	5.82816	5.92554	6.02047	6.113	6.2032	6.29088	6.37583	6.45906
Peru		17.2953	17.7548	18.1613	18.5668	18.9707	19.3792	19.7982	20.227	20.6649	21.1112	21.565	22.0256	22.4919	22.963	23.4236	23.8633	24.2864	24.6922	25.0788	25.4448	25.797	26.1423	26.48	26.8093	27.1297	27.4424	27.7492	28.0497	28.3479	28.6474	28.948	29.2489
Puerto Rico		3.20965	3.23897	3.279	3.31603	3.35004	3.38211	3.4133	3.44447	3.47499	3.5056	3.53691	3.56211	3.58518	3.6155	3.64924	3.6831	3.72466	3.75943	3.7811	3.80008	3.81061	3.81877	3.8237	3.8261	3.82688	3.82136	3.80521	3.783	3.76087	3.74041	3.72198	3.70669
Saint Kitts and Nevis		0.04357	0.04348	0.04338	0.04323	0.04309	0.04293	0.04273	0.04248	0.04219	0.04192	0.04166	0.04141	0.04154	0.04206	0.04261	0.04313	0.04358	0.04407	0.04461	0.04513	0.04566	0.04619	0.04669	0.04714	0.04753	0.0479	0.04828	0.04866	0.04906	0.04948	0.0499	0.05031
Saint Lucia		0.12248	0.124	0.12558	0.12729	0.12912	0.13101	0.13271	0.13418	0.1355	0.1365	0.13756	0.13917	0.14099	0.14279	0.14464	0.1465	0.14817	0.14971	0.15102	0.15211	0.1533	0.1544	0.1553	0.15601	0.15666	0.15737	0.15813	0.15887	0.15959	0.16027	0.16092	0.16156
Saint Vincent/Grenadines		0.09814	0.0992	0.10048	0.10181	0.10289	0.10385	0.10476	0.1055	0.10614	0.10675	0.10739	0.10796	0.10822	0.10854	0.10869	0.10879	0.10877	0.10861	0.1084	0.10812	0.10786	0.10761	0.10726	0.10688	0.10648	0.10607	0.10569	0.10531	0.10494	0.10457	0.10422	0.10387
Suriname		0.35408	0.36117	0.37021	0.37914	0.38702	0.39447	0.40014	0.40391	0.40791	0.41293	0.41608	0.41752	0.41957	0.421	0.42307	0.42774	0.43318	0.43968	0.44743	0.45574	0.46404	0.47185	0.48001	0.48813	0.4959	0.50364	0.5119	0.52093	0.52982	0.53813	0.54586	0.55316
Trinidad and Tobago		1.09051	1.10784	1.12732	1.14815	1.16888	1.18903	1.20833	1.22499	1.23838	1.24816	1.25519	1.26039	1.2635	1.26512	1.26525	1.26432	1.26246	1.26015	1.25764	1.25463	1.25178	1.24905	1.24584	1.24243	1.23933	1.23669	1.23456	1.23281	1.23132	1.22995	1.22869	1.22751
Turks and Caicos Islands		0.00747	0.00779	0.00815	0.00852	0.00891	0.00932	0.00973	0.01016	0.01061	0.01106	0.01151	0.01214	0.0128	0.01349	0.0142	0.01494	0.01572	0.01654	0.01742	0.01834	0.01927	0.02022	0.02141	0.02292	0.02495	0.02759	0.03058	0.03391	0.03762	0.04098	0.04321	0.04482
Uruguay		2.93049	2.94813	2.96835	2.98883	3.00827	3.01887	3.03226	3.04498	3.05763	3.07118	3.08512	3.09871	3.11143	3.12383	3.13703	3.15004	3.16414	3.18092	3.19592	3.20795	3.21979	3.23119	3.24159	3.25065	3.25847	3.26491	3.27131	3.27888	3.28637	3.29377	3.30108	3.30854
Venezuela		14.7679	15.1663	15.6208	16.0844	16.5445	16.9975	17.4502	17.9102	18.3785	18.8507	19.3252	19.7907	20.2461	20.6914	21.126	21.549	21.9608	22.3618	22.7514	23.1286	23.4928	23.8439	24.1918	24.5454	24.9046	25.2692	25.6415	26.0235	26.4148	26.8148	27.2232	27.6357
Virgin Islands, U.S.		0.09964	0.09985	0.10007	0.10035	0.1006	0.10076	0.10084	0.1009	0.10095	0.10104	0.10396	0.10481	0.10571	0.10658	0.10732	0.10782	0.10809	0.10836	0.10854	0.1086	0.10864	0.10839	0.10821	0.10809	0.10795	0.10786	0.1077	0.10742	0.10709	0.10671	0.10627	0.10578
Virgin Islands, British		0.011	0.01142	0.01182	0.01226	0.01273	0.01318	0.01363	0.0141	0.01462	0.01514	0.01569	0.01627	0.01699	0.01769	0.01838	0.01906	0.01974	0.02044	0.02113	0.02181	0.02251	0.0232	0.02386	0.02449	0.02514	0.02587	0.02668	0.02746	0.02818	0.0289	0.02964	0.03039
Europe		530.436	533.56	536.175	538.543	540.9	543.32	545.864	548.397	550.973	554.285	557.498	560.459	563.219	565.634	568.019	570.248	572.433	574.472	576.315	578.366	580.782	583.442	586.239	589.065	592.044	595.009	597.841	600.879	602.076	604.512	606.679	608.852
Albania		2.67141	2.72427	2.7801	2.83732	2.896	2.9567	3.01544	3.07532	3.13684	3.1958	3.24493	3.18105	3.07201	3.06629	3.11116	3.15815	3.2036	3.22541	3.21277	3.18733	3.15835	3.128	3.09803	3.06967	3.04564	3.02453	3.00578	2.99158	2.98412	2.98254	2.98695	2.99467
Austria		7.54943	7.56463	7.57461	7.5529	7.55413	7.55978	7.56824	7.5789	7.59979	7.62786	7.72295	7.81842	7.91497	7.9886	8.02754	8.04743	8.06085	8.06988	8.07862	8.09416	8.11341	8.13169	8.14831	8.16266	8.17476	8.18469	8.19288	8.19978	8.20553	8.21028	8.21416	8.21728
Belgium		9.8468	9.8524	9.8563	9.85552	9.8553	9.8582	9.8618	9.8702	9.884	9.9377	9.96931	10.0045	10.0456	10.0854	10.1229	10.1555	10.1789	10.1998	10.217	10.2357	10.2636	10.2917	10.312	10.3308	10.3483	10.3644	10.3791	10.3922	10.404	10.4143	10.4235	10.4315
Bosnia and Herzegovina		--	--	--	--	--	--	--	--	--	--	--	--	4.12913	3.81656	3.63497	3.54665	3.55909	3.59069	3.62223	3.71723	3.80551	3.82236	3.82664	3.84273	3.87689	3.8931	3.89441	3.89185	3.88895	3.88694	3.8849	3.88236
Bulgaria		8.84353	8.86944	8.8921	8.91028	8.92827	8.94357	8.95877	8.97196	8.98203	8.99006	8.89403	8.77237	8.65851	8.44187	8.35334	8.25581	8.16103	8.06606	7.97177	7.89323	7.8185	7.73842	7.6618	7.5884	7.51797	7.45035	7.38537	7.32286	7.26268	7.20469	7.14879	7.09364
Croatia		--	--	--	--	--	--	--	--	--	--	--	--	4.49401	4.48607	4.51119	4.49668	4.46403	4.44459	4.42019	4.40838	4.41083	4.43911	4.48102	4.49778	4.49687	4.4959	4.49475	4.49331	4.49154	4.48941	4.48688	4.4838
Cyprus		0.63027	0.63805	0.64532	0.6565	0.66797	0.67922	0.69043	0.70162	0.71303	0.72686	0.74506	0.76623	0.78847	0.80976	0.82921	0.84735	0.8643	0.87985	0.89373	0.90688	0.91968	0.93263	0.94681	0.96465	0.98719	1.01074	1.03103	1.04891	1.06682	1.08475	1.10268	1.12049
Czech Republic		--	--	--	--	--	--	--	--	--	--	--	--	--	10.3264	10.3302	10.3238	10.3118	10.3007	10.291	10.2804	10.2701	10.2623	10.2563	10.2511	10.2462	10.2411	10.2355	10.2287	10.2209	10.2119	10.2017	10.1902
Denmark		5.12303	5.12157	5.11781	5.1143	5.11162	5.11369	5.12053	5.12702	5.12952	5.13259	5.14095	5.15435	5.17139	5.18839	5.2056	5.23261	5.26208	5.28366	5.30277	5.32013	5.33742	5.35583	5.37469	5.39414	5.41339	5.43234	5.45066	5.46812	5.48472	5.50051	5.51558	5.52989
Faroe Islands		0.04345	0.04386	0.04425	0.04457	0.04506	0.04557	0.04605	0.04668	0.04709	0.04728	0.04744	0.04757	0.04778	0.04609	0.0445	0.04354	0.04359	0.04405	0.04456	0.04512	0.04579	0.04659	0.04735	0.04795	0.04829	0.04831	0.04832	0.04849	0.04867	0.04886	0.04906	0.04927
Finland		4.77954	4.79996	4.82693	4.85579	4.88179	4.90178	4.91739	4.93173	4.94663	4.96244	4.98643	5.01379	5.04104	5.06485	5.08604	5.10465	5.12031	5.13441	5.14698	5.1581	5.1686	5.18031	5.19304	5.20441	5.21451	5.22344	5.23137	5.23846	5.24475	5.25028	5.25507	5.25925
Former Czechoslovakia		15.2547	15.3116	15.3517	15.3883	15.4233	15.4548	15.4809	15.5109	15.537	15.559	15.5721	15.5868	15.6186	--	--	--	--	--	--	--	--	--	--	--	--	--	--	--	--	--	--	--
Former Serbia and Montenegro		--	--	--	--	--	--	--	--	--	--	--	--	10.2659	10.3069	10.351	10.3905	10.4507	10.4729	10.3428	10.1599	10.0368	9.99537	10.002	9.99637	9.98628	9.96876	--	--	--	--	--	--
Former Yugoslavia		21.769	21.9022	22.0471	22.1733	22.2813	22.4062	22.5235	22.632	22.7337	22.8275	22.9072	22.9765	--	--	--	--	--	--	--	--	--	--	--	--	--	--	--	--	--	--	--	--
France		55.1632	55.4547	55.7565	55.9923	56.3129	56.561	56.7995	57.0664	57.3353	57.9053	58.2555	58.6048	58.9541	59.2684	59.5481	59.823	60.0949	60.3657	60.6437	60.9353	61.2554	61.6059	61.9636	62.3119	62.6784	63.0597	63.4569	63.8529	64.2202	64.5799	64.9408	65.2961
Germany		--	--	--	--	--	--	--	--	--	--	--	79.9842	80.5978	81.1323	81.4142	81.6537	81.8907	82.0111	82.0237	82.0748	82.1837	82.3207	82.4584	82.5045	82.4872	82.4394	82.3464	82.2369	82.0654	81.8377	81.6445	81.4718
Germany, East		16.737	16.727	16.721	16.711	16.688	16.644	16.577	16.49	16.396	16.311	16.249	--	--	--	--	--	--	--	--	--	--	--	--	--	--	--	--	--	--	--	--	--
Germany, West		61.5609	61.6748	61.6143	61.4107	61.1674	61.0409	61.1365	61.2283	61.6346	62.3339	63.1314	--	--	--	--	--	--	--	--	--	--	--	--	--	--	--	--	--	--	--	--	--
Gibraltar		0.02883	0.02927	0.02885	0.02835	0.02823	0.02865	0.02907	0.02953	0.03003	0.03042	0.02911	0.0281	0.02809	0.02722	0.02678	0.02677	0.02678	0.02675	0.02675	0.02676	0.02727	0.02802	0.0282	0.02832	0.02841	0.02846	0.02854	0.02861	0.02871	0.0288	0.02888	0.02896
Greece		9.64251	9.72935	9.78648	9.84053	9.88717	9.92325	9.95137	9.97449	9.98272	10.0308	10.1296	10.2509	10.3254	10.383	10.4298	10.4575	10.4794	10.5024	10.5201	10.5367	10.5591	10.5815	10.6039	10.6259	10.6475	10.6684	10.6881	10.7063	10.7228	10.7374	10.7499	10.7601
Hungary		10.7111	10.7119	10.7055	10.6895	10.6681	10.6487	10.6306	10.6127	10.4425	10.398	10.3719	10.3978	10.3831	10.33	10.2965	10.2808	10.2593	10.2295	10.2004	10.1716	10.1474	10.1299	10.1128	10.092	10.0726	10.0576	10.0463	10.0342	10.0205	10.0072	9.99234	9.97606
Iceland		0.22816	0.2308	0.234	0.23704	0.2395	0.2414	0.243	0.24468	0.24989	0.25275	0.25472	0.25683	0.25901	0.26127	0.26608	0.26753	0.269	0.27119	0.274	0.27728	0.28104	0.28481	0.28803	0.29106	0.29397	0.29674	0.29939	0.30193	0.30437	0.30669	0.30891	0.31106
Ireland		3.401	3.4434	3.48	3.504	3.529	3.54	3.5405	3.5399	3.5296	3.5132	3.5082	3.53077	3.55776	3.57835	3.59554	3.61389	3.63618	3.68123	3.72801	3.77486	3.8222	3.8727	3.93313	4.00217	4.09116	4.19919	4.30902	4.41998	4.51771	4.58	4.62292	4.67098
Italy		56.4513	56.5025	56.5324	56.6236	56.6871	56.7181	56.7175	56.7101	56.7111	56.7113	56.7134	56.7147	56.9089	57.0866	57.1981	57.2945	57.4061	57.4929	57.567	57.6555	57.7844	57.931	58.0767	58.336	58.716	59.0378	59.2729	59.6267	60.0913	60.4616	60.749	61.0168
Luxembourg		0.3644	0.3654	0.36572	0.36589	0.36627	0.36717	0.36902	0.37166	0.37562	0.37762	0.38297	0.38715	0.39255	0.39808	0.40376	0.4097	0.41557	0.42101	0.4265	0.43253	0.43878	0.44478	0.45079	0.45676	0.46269	0.46857	0.47441	0.48022	0.48601	0.49178	0.49754	0.5033
Macedonia		--	--	--	--	--	--	--	--	--	--	--	--	1.88936	1.91756	1.93503	1.95405	1.9711	1.98486	1.99547	2.00499	2.01451	2.02391	2.03044	2.03515	2.04009	2.04526	2.05055	2.05592	2.06132	2.06672	2.07209	2.07733
Malta		0.364	0.36365	0.36022	0.35577	0.35138	0.34704	0.34663	0.34905	0.35195	0.35532	0.35911	0.36258	0.3659	0.37001	0.37361	0.37689	0.37996	0.38295	0.38561	0.3878	0.38995	0.39187	0.39352	0.39518	0.39685	0.39853	0.40021	0.40188	0.40353	0.40517	0.40677	0.40833
Montenegro		--	--	--	--	--	--	--	--	--	--	--	--	--	--	--	--	--	--	--	--	--	--	--	--	--	--	0.69187	0.68474	0.67818	0.67218	0.66673	0.66181
Netherlands		14.1553	14.2577	14.3224	14.3748	14.4335	14.5044	14.5851	14.6788	14.775	14.8627	14.9659	15.0812	15.1898	15.2911	15.3989	15.4764	15.5453	15.6221	15.7171	15.8199	15.9302	16.0468	16.1455	16.2166	16.2663	16.2991	16.3204	16.351	16.4101	16.4904	16.5738	16.6537
Norway		4.08562	4.0997	4.11479	4.12843	4.14009	4.15242	4.1666	4.18615	4.20873	4.22614	4.24201	4.26173	4.28636	4.31196	4.33664	4.3591	4.38128	4.40567	4.43272	4.46338	4.4924	4.5152	4.53559	4.5554	4.57456	4.59304	4.61082	4.62793	4.64446	4.66054	4.67631	4.69185
Poland		35.578	35.902	36.2274	36.5714	36.9041	37.2258	37.5043	37.7407	37.8668	37.9702	38.1194	38.2532	38.3707	38.4678	38.5483	38.6006	38.6298	38.655	38.6688	38.6655	38.6542	38.6436	38.626	38.6028	38.5804	38.558	38.5369	38.5182	38.5007	38.4829	38.4637	38.4416
Portugal		9.7778	9.85008	9.85965	9.87224	9.88539	9.89719	9.90741	9.91529	9.92061	9.92315	9.92269	9.91901	9.92768	9.96783	10.0277	10.0655	10.0999	10.1564	10.2248	10.2834	10.3356	10.3867	10.4339	10.48	10.5242	10.5662	10.6059	10.6428	10.6769	10.7079	10.7358	10.7603
Romania		22.13	22.2566	22.3567	22.4073	22.4538	22.5212	22.5997	22.6864	22.7689	22.8521	22.866	22.8256	22.797	22.7658	22.733	22.6874	22.6225	22.5577	22.5114	22.4763	22.4474	22.4155	22.3657	22.3047	22.2476	22.1972	22.1505	22.1061	22.0608	22.0118	21.9593	21.9046
Serbia		--	--	--	--	--	--	--	--	--	--	--	--	--	--	--	--	--	--	--	--	--	--	--	--	--	--	9.2528	9.23257	7.41388	7.37934	7.34485	7.31056
Slovakia		--	--	--	--	--	--	--	--	--	--	--	--	--	5.32358	5.34526	5.36159	5.37319	5.38301	5.39024	5.39574	5.40032	5.40468	5.41005	5.41641	5.42357	5.43136	5.43945	5.4475	5.45541	5.46305	5.47031	5.47704
Slovenia		--	--	--	--	--	--	--	--	--	--	--	--	1.99921	1.99993	2.00104	2.00283	2.00743	2.01161	2.01081	2.00965	2.01056	2.01118	2.0115	2.0116	2.01147	2.01107	2.01035	2.00925	2.00771	2.00569	2.00314	2.00009
Spain		37.4884	37.7508	37.9833	38.1842	38.3629	38.5348	38.7076	38.8807	39.0539	39.2145	39.3508	39.4614	39.5524	39.6377	39.7079	39.7647	39.8206	39.9072	40.0461	40.2514	40.589	41.0469	41.6396	42.321	43.0002	43.7044	44.4318	45.2116	45.9104	46.2952	46.506	46.7548
Sweden		8.31047	8.32049	8.32526	8.32903	8.34262	8.35634	8.38407	8.4214	8.46934	8.52628	8.60082	8.66811	8.71887	8.76928	8.83149	8.87789	8.89223	8.89762	8.90268	8.90979	8.92357	8.93991	8.95417	8.97031	8.9864	9.00177	9.0166	9.03109	9.04539	9.05965	9.07406	9.08873
Switzerland		6.38523	6.4261	6.46943	6.50304	6.53231	6.56707	6.60718	6.65463	6.70951	6.76978	6.84351	6.92508	7.00061	7.06402	7.12099	7.16421	7.18878	7.20216	7.21705	7.2425	7.27725	7.31222	7.34865	7.38454	7.41734	7.44822	7.47865	7.52953	7.611	7.69323	7.76986	7.8501
Turkey		45.048	46.2532	47.4642	48.6606	49.8397	50.997	52.1273	53.2427	54.3555	55.4625	56.5607	57.6502	58.7312	59.8005	60.8671	61.9402	63.0178	64.0977	65.1772	66.254	67.3293	68.4049	69.479	70.5486	71.6135	72.6738	73.7261	74.7678	75.7938	76.8055	77.8041	78.7856
United Kingdom		56.314	56.3826	56.3307	56.3646	56.4352	56.5841	56.7509	56.927	57.0957	57.2513	57.4107	57.5736	57.7359	57.8542	58.0057	58.1868	58.3446	58.4941	58.6804	58.9097	59.14	59.3747	59.6015	59.8236	60.127	60.4873	60.8468	61.2493	61.6426	61.9969	62.3484	62.6984
Eurasia		265.993	268.258	270.595	273.094	275.682	278.24	280.803	283.306	285.69	287.216	289.116	290.646	291.715	292.146	292.188	292.137	291.957	291.674	291.377	290.896	290.247	289.527	288.771	288.077	287.502	287.045	286.733	286.759	287.075	287.566	288.068	288.499
Armenia		--	--	--	--	--	--	--	--	--	--	--	--	3.37833	3.23157	3.12609	3.06875	3.0634	3.059	3.04915	3.04762	3.04256	3.02759	3.01382	3.00171	2.99136	2.9829	2.97637	2.97165	2.96859	2.967	2.9668	2.96798
Azerbaijan		--	--	--	--	--	--	--	--	--	--	--	--	7.71804	7.83912	7.95214	8.05059	8.13833	8.22351	8.30867	8.38845	8.46308	8.53231	8.59765	8.66291	8.73781	8.82544	8.91917	9.01504	9.11109	9.20678	9.30167	9.39728
Belarus		--	--	--	--	--	--	--	--	--	--	--	--	10.2276	10.2501	10.238	10.2049	10.1707	10.1285	10.0917	10.0636	10.0334	9.99948	9.95488	9.9049	9.85565	9.80645	9.76371	9.73333	9.71205	9.69633	9.68007	9.66151
Estonia		--	--	--	--	--	--	--	--	--	--	--	--	1.52872	1.49143	1.46754	1.44651	1.42783	1.41335	1.40097	1.38976	1.37984	1.36998	1.36012	1.35072	1.34166	1.33289	1.32433	1.31591	1.3076	1.29937	1.29117	1.28296
Former U.S.S.R.		265.993	268.258	270.595	273.094	275.682	278.24	280.803	283.306	285.69	287.216	289.116	290.646	--	--	--	--	--	--	--	--	--	--	--	--	--	--	--	--	--	--	--	--
Georgia		--	--	--	--	--	--	--	--	--	--	--	--	5.35529	5.24762	5.12081	5.01295	4.93457	4.88348	4.8485	4.81567	4.77721	4.74616	4.72836	4.71092	4.69389	4.6774	4.66147	4.646	4.63084	4.61581	4.60083	4.58587
Kazakhstan		--	--	--	--	--	--	--	--	--	--	--	--	16.9646	16.9024	16.6631	16.3899	16.2366	16.0524	15.8408	15.7095	15.6873	15.7369	15.8021	15.8825	15.9886	16.1227	16.2837	16.4598	16.6496	16.8633	17.0848	17.3045
Kyrgyzstan		--	--	--	--	--	--	--	--	--	--	--	--	4.59206	4.58271	4.57529	4.62002	4.68547	4.75046	4.81667	4.88311	4.93713	4.97683	5.01396	5.05935	5.11354	5.16425	5.21277	5.25556	5.29869	5.35818	5.41047	5.45078
Latvia		--	--	--	--	--	--	--	--	--	--	--	--	2.61587	2.56571	2.52353	2.48801	2.46028	2.43597	2.41317	2.39366	2.37618	2.35823	2.34021	2.32294	2.30631	2.29024	2.27474	2.25981	2.24542	2.2315	2.21797	2.20471
Lithuania		--	--	--	--	--	--	--	--	--	--	--	--	3.70028	3.689	3.67964	3.67358	3.66832	3.66437	3.66117	3.65845	3.65439	3.64575	3.63323	3.62009	3.6079	3.59662	3.58591	3.57544	3.56521	3.55518	3.54532	3.53555
Moldova		--	--	--	--	--	--	--	--	--	--	--	--	4.38231	4.38077	4.37195	4.35507	4.33397	4.30436	4.2662	4.22486	4.18021	4.13509	4.08889	4.04095	3.99461	3.94826	3.90108	3.85544	3.81176	3.7707	3.7318	3.69412
Russia		--	--	--	--	--	--	--	--	--	--	--	--	148.444	148.489	148.622	148.758	148.597	148.374	148.155	147.699	147.054	146.334	145.53	144.737	144	143.32	142.736	142.441	142.393	142.461	142.527	142.526
Tajikistan		--	--	--	--	--	--	--	--	--	--	--	--	5.50003	5.54663	5.60449	5.67823	5.76436	5.86469	5.98349	6.11086	6.2297	6.3391	6.45201	6.56785	6.68843	6.81479	6.94406	7.0766	7.21188	7.34915	7.48749	7.6272
Turkmenistan		--	--	--	--	--	--	--	--	--	--	--	--	3.83023	3.91796	4.0039	4.07873	4.14267	4.20061	4.26226	4.32469	4.38549	4.44458	4.50262	4.55613	4.60847	4.66416	4.71951	4.77423	4.82933	4.88489	4.94092	4.9975
Ukraine		--	--	--	--	--	--	--	--	--	--	--	--	51.8673	51.8842	51.6356	51.2448	50.81	50.3674	49.9372	49.4851	49.0052	48.5079	48.0568	47.6671	47.3054	46.9594	46.6203	46.2999	45.9943	45.7004	45.4156	45.1347
Uzbekistan		--	--	--	--	--	--	--	--	--	--	--	--	21.6096	22.1276	22.6038	23.0673	23.5239	23.9522	24.3423	24.7016	25.0418	25.3724	25.6963	25.9921	26.2681	26.5399	26.8105	27.0793	27.345	27.606	27.8657	28.1286
Middle East		95.1391	98.9997	102.939	106.994	111.135	115.454	119.773	123.841	128.112	132.351	136.991	139.599	144.667	148.226	151.358	154.889	158.561	162.261	165.903	169.509	173.124	176.827	180.416	183.831	187.429	191.316	195.799	200.799	205.337	209.389	213.412	217.26
Bahrain		0.34757	0.36352	0.3778	0.39264	0.40771	0.42322	0.43941	0.45578	0.47198	0.48863	0.50567	0.52252	0.53802	0.55264	0.5675	0.58207	0.59647	0.61085	0.62521	0.63996	0.65486	0.67209	0.71483	0.781	0.84812	0.91597	0.98439	1.05358	1.10729	1.14437	1.18008	1.2147
Iran		39.7087	41.4508	43.2182	44.9893	46.7921	48.6189	50.4644	52.3402	54.1783	55.9267	58.1001	60.4964	62.3101	63.0997	63.4604	64.2173	65.1158	66.0419	66.9537	67.8039	68.6316	69.5315	70.2837	70.8118	71.4395	72.2827	73.1844	74.0933	75.0254	75.9676	76.9233	77.8912
Iraq		13.2328	13.7031	14.1733	14.6522	15.1606	15.6936	16.2473	16.5432	17.0406	17.5725	18.14	17.4774	17.8683	18.4115	18.9761	19.5636	20.168	20.7812	21.4027	22.0356	22.6791	23.3347	24.004	24.6852	25.3762	26.0761	26.7842	27.5002	28.2214	28.9456	29.6716	30.3996
Israel		5.09743	5.19025	5.2843	5.40155	5.52187	5.64483	5.77007	5.90159	6.04039	6.17702	6.37648	6.64832	6.92977	7.21701	7.52463	7.86008	8.18692	5.66009	5.80873	5.96029	6.11457	6.25134	6.36954	6.49192	6.61773	6.74292	6.86688	6.99006	7.11236	7.2337	7.35399	7.47305
Jordan		2.16278	2.25377	2.34764	2.44068	2.53438	2.63036	2.7275	2.8239	2.92078	3.0235	3.26656	3.63483	3.87091	3.98707	4.08473	4.17643	4.28166	4.38525	4.48522	4.58483	4.68762	4.79335	4.90206	5.01378	5.12826	5.2454	5.61722	5.99719	6.13263	6.26929	6.40709	6.50827
Kuwait		1.36977	1.43219	1.49749	1.56582	1.63731	1.73282	1.80938	1.88722	1.96672	2.04819	2.13116	0.94094	1.40272	1.48804	1.57533	1.66435	1.74074	1.80173	1.85985	1.91633	1.97226	2.02773	2.08331	2.13982	2.19729	2.25666	2.31688	2.3758	2.43319	2.489	2.54317	2.59563
Lebanon		2.8987	2.9517	3.0056	3.06024	3.11544	3.17096	3.22558	3.27798	3.32778	3.37448	3.44018	3.50613	3.54803	3.58539	3.62071	3.6539	3.68504	3.71429	3.74182	3.76753	3.7915	3.81411	3.83546	3.85548	3.87449	3.89239	3.8511	3.89556	4.03802	4.09932	4.12525	4.1431
Oman		1.18548	1.24951	1.3136	1.37675	1.43812	1.49723	1.55439	1.61167	1.67076	1.73179	1.79438	1.86607	1.93949	2.01457	2.07679	2.13857	2.19966	2.25973	2.31861	2.37618	2.43238	2.4873	2.54108	2.59379	2.64561	2.69689	2.7482	2.80028	2.85388	2.90963	2.96772	3.02796
Palestinian Territories		--	--	--	--	--	--	--	--	--	--	--	--	--	--	--	--	--	2.8338	2.92452	3.01665	3.11009	3.20475	3.30059	3.398	3.49718	3.59785	3.69993	3.80337	3.90788	4.01313	4.11908	4.22571
Qatar		0.22909	0.24079	0.25049	0.28183	0.31238	0.34238	0.372	0.38676	0.40196	0.41765	0.43341	0.4486	0.46351	0.47896	0.49445	0.50971	0.52483	0.5476	0.5782	0.60896	0.6399	0.67144	0.70339	0.73564	0.82545	0.97253	1.11991	1.26826	1.41796	1.56853	1.71947	1.84926
Saudi Arabia		10.0215	10.6549	11.2888	11.9523	12.6069	13.3301	13.9983	14.6197	15.2331	15.8294	16.0608	16.3058	17.0607	17.6364	18.2024	18.755	19.2934	19.8184	20.3291	20.8245	21.3119	21.7961	22.274	22.7429	23.2	23.6422	24.0732	24.4985	24.9174	25.3289	25.7318	26.1317
Syria		8.75241	9.04923	9.38665	9.73512	10.0949	10.4661	10.8486	11.243	11.646	12.0529	12.5	12.9331	13.3117	13.6852	14.0614	14.4486	14.8437	15.2445	15.6499	16.0589	16.4712	16.8851	17.2998	17.7154	18.1368	18.5627	19.3227	20.4877	21.3249	21.763	22.1981	22.5177
United Arab Emirates		1.00029	1.06972	1.13755	1.2091	1.28439	1.36348	1.44657	1.53044	1.62275	1.72206	1.82625	1.93669	2.05629	2.1842	2.31918	2.45798	2.59958	2.74633	2.8985	3.05608	3.2193	3.38733	3.5581	3.7317	3.90795	4.0866	4.26591	4.44401	4.6214	4.79849	4.97559	5.14866
Yemen		9.13255	9.39014	9.65762	9.93626	10.2293	10.5399	10.8696	11.2193	11.5911	11.9864	12.4161	12.8824	13.368	13.8858	14.3948	14.8616	15.3257	15.8157	16.3272	16.8591	17.4073	17.9705	18.5462	19.1341	19.7338	20.3447	20.9645	21.591	22.2229	22.8582	23.4954	24.1335
Africa		475.434	490.133	505.227	520.141	533.395	548.308	563.741	578.989	594.412	610.046	627.608	644.439	661.094	677.66	696.904	713.56	730.815	748.315	766.309	785.088	804.303	824.112	844.583	865.568	887.028	908.811	931.051	953.844	977.204	1001.01	1025.19	1049.48
Algeria		18.8061	19.407	20.0338	20.681	21.3406	22.0084	22.6425	23.255	23.9177	24.5617	25.1904	25.826	26.4936	27.1547	27.7585	28.3217	28.8376	29.3182	29.7689	30.2049	30.638	31.0773	31.5237	31.9754	32.4509	32.9176	33.421	34.0024	34.6194	35.2681	35.9499	36.6543
Angola		7.20581	7.40839	7.61454	7.90661	8.17792	8.38989	8.62405	8.82447	9.03291	9.25035	9.48536	9.73972	10.0167	10.33	10.6585	10.9996	11.337	11.67	12.0133	12.3575	12.6825	12.998	13.3649	13.8158	14.3153	14.7696	15.2023	15.6518	16.1021	16.5655	17.0429	17.5447
Benin		3.45806	3.56485	3.67513	3.78904	3.90705	4.03048	4.15785	4.28791	4.42211	4.56116	4.70544	4.85506	5.01014	5.25036	5.48815	5.64683	5.82023	6.00623	6.20232	6.40677	6.61912	6.83901	7.06449	7.29371	7.52683	7.77771	8.03171	8.27816	8.53255	8.79183	9.05601	9.32503
Botswana		0.90048	0.93444	0.97065	1.00702	1.0434	1.07969	1.11576	1.15201	1.18894	1.22652	1.26461	1.3031	1.34473	1.38935	1.43369	1.47759	1.52091	1.56319	1.60401	1.64294	1.67968	1.71401	1.74618	1.77709	1.80783	1.84012	1.87578	1.91342	1.95205	1.99088	2.02931	2.0654
Burkina Faso		6.31819	6.47437	6.63723	6.80728	6.98504	7.17093	7.3711	7.59181	7.83349	8.09154	8.36104	8.64225	8.93497	9.2377	9.57065	9.90278	10.2202	10.5426	10.8727	11.2253	11.5877	12.0394	12.585	13.0654	13.4781	13.9039	14.3435	14.7972	15.2647	15.7462	16.2418	16.7515
Burundi		4.29821	4.47776	4.58491	4.7052	4.81683	4.92176	5.01886	5.14452	5.27884	5.40437	5.53564	5.67438	5.85649	5.68543	5.74968	6.16495	6.20373	6.24364	6.41743	6.63114	6.8227	7.04302	7.28679	7.55265	7.85873	8.16194	8.46451	8.78294	9.13931	9.51133	9.86312	10.2162
Cameroon		8.76249	9.04792	9.28255	9.56272	9.86713	10.1914	10.5302	10.8671	11.201	11.5401	11.8845	12.2303	12.5747	12.9205	13.2642	13.6032	13.9447	14.2901	14.638	14.9885	15.343	15.7069	16.0944	16.489	16.8727	17.2615	17.6579	18.0604	18.4677	18.8793	19.2941	19.7113
Cape Verde		0.29645	0.3002	0.30409	0.3082	0.31249	0.31689	0.32134	0.32587	0.3305	0.33517	0.33976	0.34683	0.35649	0.36624	0.37592	0.38543	0.3948	0.404	0.41297	0.42168	0.43013	0.43845	0.4467	0.45483	0.4628	0.4706	0.47831	0.48599	0.49362	0.50118	0.50866	0.5161
Central African Republic		2.34878	2.41277	2.47757	2.54328	2.62927	2.71415	2.77536	2.84088	2.91718	2.99987	3.08497	3.17449	3.26652	3.36703	3.46585	3.54441	3.62161	3.70738	3.79796	3.88922	3.97986	4.05393	4.12842	4.21492	4.28875	4.36304	4.44895	4.54373	4.64132	4.74192	4.84493	4.95003
Chad		4.52239	4.51494	4.73288	4.97116	5.02517	5.06604	5.2142	5.39152	5.55634	5.71491	5.84141	6.02822	6.26327	6.3791	6.49669	6.76969	7.051	7.26171	7.47932	7.70874	7.94268	8.17941	8.43619	8.74574	9.09766	9.40066	9.64896	9.88566	10.1113	10.3292	10.5435	10.759
Comoros		0.33976	0.34769	0.35598	0.36462	0.37363	0.38282	0.39206	0.40143	0.41093	0.42059	0.43043	0.44047	0.45073	0.46118	0.47184	0.48268	0.49395	0.50585	0.51834	0.53143	0.54514	0.55949	0.57447	0.59006	0.60626	0.62306	0.64008	0.65694	0.6736	0.69001	0.70612	0.72189
Congo (Brazzaville)		1.67429	1.72374	1.77516	1.82856	1.88398	1.94177	2.00214	2.06497	2.13006	2.19717	2.266	2.3374	2.4104	2.48894	2.57029	2.65	2.73125	2.80247	2.88	2.97232	3.10394	3.23999	3.33042	3.41425	3.50374	3.604	3.70406	3.80233	3.90501	4.01281	4.12592	4.24393
Congo (Kinshasa)		29.0109	29.8063	30.6471	31.4457	32.3415	33.3476	34.3859	35.5042	36.6693	37.8721	39.1511	40.5142	41.8462	43.29	44.8203	46.7046	47.6847	48.2889	49.3487	50.8899	52.4452	54.0577	55.7016	57.3033	58.9425	60.6981	62.5222	64.355	66.1872	68.0157	69.8513	71.7129
Cote dIvoire (IvoryCoast)		8.59326	8.92247	9.25983	9.60646	9.96343	10.3317	10.7121	11.1053	11.5117	11.9306	12.4909	13.0395	13.4221	13.8606	14.3799	14.8458	15.2814	15.6862	16.0454	16.4569	16.8846	17.311	17.6877	18.068	18.5044	18.9205	19.3268	19.7469	20.1796	20.6171	21.0588	21.5042
Djibouti		0.32687	0.34483	0.35616	0.37012	0.37461	0.38222	0.39651	0.40946	0.41715	0.44245	0.49919	0.55198	0.54709	0.53443	0.54689	0.55303	0.56843	0.59249	0.62088	0.64626	0.66942	0.69299	0.71635	0.69078	0.65741	0.6664	0.67914	0.69438	0.7092	0.72462	0.74053	0.75707
Egypt		42.6342	44.1961	45.6818	47.093	48.5502	50.0524	51.5934	52.3751	53.1622	53.9484	54.9074	55.8616	56.625	57.3843	58.157	58.945	59.7578	61.0719	62.4117	63.7735	65.1586	66.5741	68.0231	69.5019	71.0095	72.5435	74.1006	75.6765	77.2667	78.8666	80.4719	82.0796
Equatorial Guinea		0.25601	0.27178	0.28548	0.29958	0.31464	0.32519	0.33365	0.34247	0.35165	0.36119	0.3711	0.38138	0.39202	0.40304	0.41444	0.42623	0.43842	0.45103	0.46406	0.47754	0.49148	0.50592	0.52076	0.53593	0.55142	0.56723	0.58335	0.59976	0.61646	0.63344	0.6507	0.66823
Eritrea		--	--	--	--	--	--	--	--	--	--	--	--	--	--	3.37969	3.565	3.73306	3.84158	3.96311	4.07957	4.19731	4.33799	4.50543	4.70002	4.90734	5.06956	5.21433	5.35768	5.50203	5.64717	5.79298	5.93948
Ethiopia		36.0365	37.7201	39.4785	40.6739	40.0727	40.6837	41.6425	43.0586	44.5961	46.0937	47.5541	49.4476	51.2052	52.525	54.0301	55.7255	57.424	59.0763	60.7649	62.5384	64.3652	66.2305	68.1679	70.1748	72.239	74.3543	76.5353	78.7994	81.1356	83.5484	86.0429	88.5888
Gabon		0.71383	0.73084	0.75424	0.77902	0.80526	0.83304	0.85945	0.88092	0.89974	0.91884	0.93808	0.96043	0.98637	1.01316	1.04081	1.06907	1.09771	1.12694	1.15717	1.19565	1.23643	1.26915	1.30042	1.33262	1.36441	1.39569	1.42639	1.45645	1.48583	1.51499	1.54526	1.57667
Gambia, The		0.65246	0.67137	0.69084	0.71086	0.74106	0.77252	0.8053	0.83945	0.87508	0.91225	0.95103	0.99149	1.03373	1.07689	1.11959	1.16146	1.20242	1.24246	1.28157	1.31963	1.35658	1.3933	1.43071	1.46892	1.508	1.54791	1.5885	1.62965	1.6713	1.71328	1.75546	1.79786
Ghana		11.1526	11.3626	11.6381	12.4372	13.1313	13.5725	14.1427	14.4977	14.8507	15.2013	15.5488	15.8923	16.233	16.638	17.0221	17.3215	17.6172	17.9274	18.2614	18.6115	18.981	19.3667	19.7788	20.2114	20.6502	21.107	21.583	22.0686	22.5545	23.052	23.5712	24.1079
Guinea		4.44737	4.54036	4.63601	4.7344	4.95358	5.22674	5.39433	5.52841	5.66683	5.80969	6.11845	6.55247	6.80052	6.98911	7.20949	7.4457	7.70157	7.79106	7.90661	8.1544	8.35041	8.41692	8.5203	8.75554	8.97198	9.15373	9.34573	9.56922	9.80651	10.058	10.324	10.601
Guinea-Bissau		0.7889	0.80706	0.82577	0.84501	0.86478	0.88506	0.90593	0.92741	0.94954	0.97239	0.99599	1.02022	1.051	1.08446	1.11651	1.14333	1.16626	1.19411	1.22224	1.25041	1.27886	1.30645	1.33312	1.35992	1.38693	1.41416	1.44275	1.47278	1.50318	1.53396	1.56513	1.59668
Kenya		16.3307	16.9875	17.6603	18.3485	19.0508	19.7623	20.4785	21.1978	21.9187	22.6389	23.3609	24.1329	25.0396	25.8445	26.4872	27.163	27.8365	28.5136	29.1882	29.8743	30.6059	31.4231	32.3135	33.2448	34.2234	35.2463	36.3162	37.4089	38.5408	39.7077	40.8431	41.9435
Lesotho		1.35857	1.39518	1.43282	1.47148	1.51111	1.55164	1.5866	1.61569	1.64484	1.67402	1.70326	1.7325	1.76171	1.79079	1.8195	1.84757	1.86905	1.88354	1.8966	1.90767	1.91632	1.92234	1.92564	1.92635	1.9249	1.92212	1.9192	1.91686	1.91547	1.91613	1.91955	1.92489
Liberia		1.8571	1.913	1.97148	2.03237	2.09577	2.16175	2.23038	2.30176	2.37595	2.45297	2.13859	1.81471	1.89388	1.95263	1.91753	1.90028	1.93223	2.09745	2.34951	2.49539	2.60067	2.67979	2.75304	2.76968	2.79594	2.93008	3.10761	3.26994	3.44037	3.58339	3.68508	3.78676
Libya		3.06043	3.19789	3.3364	3.47528	3.61396	3.66003	3.6809	3.77572	3.88324	3.99098	4.09844	4.20512	4.31051	4.41405	4.51709	4.58391	4.61364	4.68516	4.79878	4.91216	5.02475	5.13595	5.24512	5.35327	5.46163	5.57003	5.67821	5.78615	5.89411	6.00225	6.11036	5.76716
Madagascar		8.69125	8.93876	9.19587	9.46302	9.74054	10.0286	10.3274	10.6369	10.9573	11.2892	11.6329	11.9887	12.3567	12.7366	13.1284	13.5324	13.9485	14.3766	14.8166	15.2637	15.7124	16.1686	16.6389	17.1231	17.6211	18.1318	18.6534	19.1857	19.7287	20.2824	20.8466	21.421
Malawi		6.25893	6.45967	6.66854	6.88393	7.10435	7.33001	7.60855	8.05274	8.58662	9.09083	9.546	9.93081	10.3096	10.4951	10.3204	10.264	10.5268	10.8388	11.1553	11.4769	11.8015	12.1287	12.4601	12.7968	13.1401	13.4921	13.8557	14.2328	14.6237	15.0288	15.4475	15.8793
Mali		6.86802	7.01105	7.15768	7.30823	7.46315	7.62294	7.78808	7.95896	8.13153	8.31369	8.48685	8.67315	8.90299	9.112	9.3317	9.48832	9.66487	9.92461	10.1785	10.4759	10.7877	11.1116	11.447	11.7943	12.1542	12.5272	12.9125	13.3092	13.7188	14.144	14.5826	15.0324
Mauritania		1.54491	1.57765	1.61189	1.64759	1.68477	1.72347	1.76368	1.80539	1.8485	1.88583	1.92498	1.97343	2.04282	2.11924	2.18334	2.23479	2.27068	2.31522	2.3741	2.43691	2.50087	2.56579	2.63185	2.69924	2.76795	2.83794	2.9091	2.98145	3.05493	3.12949	3.20506	3.28163
Mauritius		0.9637	0.97905	0.99204	1.00218	1.01204	1.02054	1.02823	1.03627	1.04494	1.0534	1.0616	1.07172	1.08481	1.09864	1.1113	1.12312	1.13534	1.14835	1.16066	1.17313	1.18593	1.19788	1.20959	1.221	1.23206	1.24282	1.25343	1.2639	1.27419	1.28426	1.2941	1.30372
Morocco		19.4873	19.8462	20.1987	20.6794	21.1608	21.6438	22.1274	22.6106	23.0865	23.5498	24	24.4337	24.8611	25.2926	25.7232	26.1476	26.5636	26.9687	27.361	27.742	28.113	28.4775	28.8389	29.1971	29.5515	29.901	30.2478	30.5944	30.9405	31.2852	31.6274	31.9684
Mozambique		12.1026	12.3675	12.6135	12.8621	13.0836	13.293	13.4327	13.2296	12.9037	12.8562	12.9892	13.2078	13.4065	13.8806	14.9402	15.8882	16.3834	16.8114	17.2196	17.6052	17.9968	18.3958	18.8019	19.2153	19.6371	20.0686	20.5117	20.9688	21.4392	21.9217	22.4174	22.9489
Namibia		--	--	--	--	--	--	--	--	--	--	1.47057	1.51199	1.5525	1.59514	1.63833	1.68148	1.72432	1.76614	1.80653	1.8467	1.89344	1.9351	1.96067	1.98343	2.00665	2.02836	2.04915	2.06903	2.08867	2.10866	2.12847	2.14759
Niger		6.09347	6.239	6.38918	6.54413	6.70405	6.86921	7.03981	7.21596	7.39913	7.6023	7.82547	8.05715	8.29818	8.55448	8.82206	9.11028	9.41429	9.7167	10.0357	10.3726	10.7253	11.0992	11.4909	11.9014	12.3317	12.7821	13.2533	13.7404	14.2387	14.7488	15.27	15.8018
Nigeria		74.8288	77.1577	79.5195	81.174	82.732	84.8976	87.101	89.4193	91.7894	94.2127	96.6903	99.2219	101.806	104.438	107.116	109.833	112.588	115.377	118.203	121.126	124.207	127.451	130.863	134.451	138.138	141.852	145.628	149.488	153.433	157.473	161.605	165.823
Reunion		0.51	0.5129	0.51581	0.52542	0.5352	0.54516	0.55531	0.56564	0.57617	0.5869	0.59782	0.609	0.62039	0.63199	0.64381	0.65585	0.66811	0.68061	0.69334	0.7063	0.71634	0.72653	0.73686	0.74734	0.75796	0.76874	0.77967	0.79076	0.802	0.81431	0.82681	0.8395
Rwanda		5.13984	5.30899	5.48328	5.66317	5.83374	5.98659	6.16171	6.3728	6.59722	6.81686	6.99932	7.14374	7.29857	7.59668	6.50553	5.47298	6.54646	7.64742	8.04184	8.22235	8.39841	8.61098	8.85737	9.09847	9.36125	9.61107	9.85722	10.1411	10.4408	10.7463	11.056	11.3704
Saint Helena		0.00647	0.00658	0.00664	0.00675	0.00749	0.00794	0.00831	0.00654	0.00659	0.00663	0.00668	0.00673	0.00678	0.00684	0.00689	0.00695	0.007	0.00706	0.00712	0.00718	0.00723	0.00728	0.00734	0.00739	0.00743	0.00748	0.00752	0.00756	0.0076	0.00764	0.00767	0.0077
Sao Tome and Principe		0.09407	0.09644	0.09824	0.10013	0.10212	0.10419	0.10635	0.1086	0.11094	0.11338	0.11593	0.1186	0.12091	0.12285	0.12492	0.12714	0.12953	0.13209	0.1348	0.13767	0.14069	0.14385	0.14713	0.15051	0.15397	0.15751	0.16111	0.16475	0.16842	0.1721	0.17581	0.17951
Senegal		5.61133	5.75446	5.90285	6.05554	6.2137	6.37841	6.54979	6.72784	6.91257	7.12729	7.34761	7.55397	7.75925	7.961	8.16615	8.37806	8.59491	8.80985	9.03714	9.25282	9.46928	9.7162	9.97244	10.2401	10.5191	10.8041	11.0961	11.3943	11.6983	12.0081	12.3232	12.6438
Seychelles		0.06395	0.0647	0.06528	0.06585	0.0665	0.06718	0.06784	0.06846	0.0692	0.07001	0.0708	0.07165	0.0725	0.07332	0.07413	0.07493	0.07571	0.07641	0.07717	0.07814	0.07916	0.08017	0.08113	0.08205	0.08297	0.08389	0.0848	0.0857	0.0866	0.08748	0.08834	0.08919
Sierra Leone		3.33503	3.40215	3.47225	3.54564	3.62254	3.70309	3.78739	3.87558	3.96778	4.06415	4.2282	4.3349	4.24628	4.09967	3.97796	3.88144	3.8105	3.76521	3.74573	3.73557	3.80906	4.04341	4.28683	4.46568	4.6022	4.70805	4.81762	4.91833	5.023	5.13214	5.2457	5.36367
Somalia		5.79356	5.8288	5.8345	6.01035	6.21774	6.45854	6.71493	6.93908	6.91829	6.76633	6.69204	6.46448	6.11621	6.10102	6.26444	6.40072	6.57426	6.75108	6.99166	7.24166	7.50056	7.76577	8.01676	8.27177	8.53664	8.79016	9.00859	9.23811	9.45476	9.61321	9.76789	9.92564
South Africa		29.2516	30.1687	31.14	32.144	33.1816	34.2541	35.1014	35.9477	36.7949	37.6393	38.4763	39.2995	40.0911	40.9406	41.6616	42.2279	42.794	43.3536	43.9619	44.5263	45.0641	45.5762	46.0769	46.5666	47.0329	47.4834	47.9257	48.3671	48.7828	49.0525	49.1091	49.004
Sudan and South Sudan		19.4508	20.2115	21.0064	21.709	22.2553	22.8264	23.4234	24.0471	24.6986	25.3788	26.0888	26.8297	27.6026	28.373	29.033	29.7097	30.4038	31.1157	31.8459	32.5949	33.3634	34.1518	34.9607	35.7907	36.6425	37.5167	38.4139	39.2911	40.3177	41.4801	42.581	43.6975
Swaziland		0.61146	0.63131	0.64981	0.67241	0.69634	0.72157	0.74942	0.77759	0.81499	0.8493	0.8816	0.92247	0.95902	0.98872	0.99492	1.00364	1.03245	1.06106	1.0894	1.11714	1.14393	1.16952	1.19371	1.21644	1.23795	1.25898	1.2798	1.29991	1.3191	1.33719	1.35405	1.37042
Tanzania		18.6534	19.1877	19.7341	20.3018	20.8867	21.484	22.1057	22.7882	23.4775	24.1379	24.8048	25.5036	26.2403	27.1146	28.1599	29.0646	29.6744	30.3766	31.2636	32.1872	33.1933	34.1906	35.2268	36.3067	37.3824	38.4861	39.6181	40.788	41.9674	43.0947	44.2882	45.5909
Togo		2.62551	2.71957	2.8166	2.9175	3.02179	3.12943	3.24072	3.35592	3.47514	3.59714	3.72079	3.84605	3.97281	3.95258	3.98199	4.20291	4.40207	4.57245	4.71517	4.85245	4.99183	5.13457	5.27793	5.42496	5.57821	5.71452	5.8654	6.04238	6.22035	6.40501	6.58724	6.77199
Tunisia		6.44318	6.60571	6.7341	6.85989	7.18453	7.3637	7.547	7.72769	7.89783	8.05491	8.207	8.36104	8.51448	8.66619	8.81166	8.94655	9.07299	9.19313	9.30414	9.40737	9.50799	9.60957	9.71022	9.81165	9.91368	10.0129	10.112	10.2129	10.3158	10.4206	10.525	10.6292
Uganda		12.0197	12.2957	12.6177	12.9743	13.3843	13.811	14.2711	14.8113	15.3973	15.9856	16.549	17.1258	17.7353	18.4041	19.0903	19.6403	20.1974	20.8131	21.4613	22.1906	22.9161	23.6376	24.391	25.2001	26.047	26.9166	27.8107	28.7102	29.5986	30.5209	31.5072	32.5602
Western Sahara		0.12404	0.13909	0.15455	0.16568	0.1724	0.17933	0.18648	0.19385	0.20143	0.20926	0.21737	0.22575	0.2344	0.2433	0.25244	0.26387	0.27767	0.29184	0.30635	0.32118	0.3363	0.35169	0.36739	0.3834	0.39974	0.4154	0.43032	0.4454	0.46063	0.47601	0.49152	0.50716
Zambia		5.54036	5.7115	5.91251	6.13271	6.33956	6.53543	6.75716	6.98553	7.19486	7.39671	7.60338	7.81778	8.03505	8.25252	8.47128	8.6901	8.91542	9.16924	9.42865	9.69259	9.98388	10.2846	10.5584	10.8199	11.0883	11.3725	11.6783	12.0007	12.3377	12.6781	13.0419	13.4246
Zimbabwe		7.16997	7.42922	7.63652	7.92834	8.24121	8.56049	8.87678	9.21648	9.56005	9.8682	10.156	10.4374	10.7203	10.9764	11.0865	11.1595	11.317	11.4694	11.6069	11.7331	11.82	11.8679	11.866	11.8155	11.735	11.6395	11.5443	11.4432	11.3501	11.3926	11.6519	12.0843
Asia & Oceania		2469.81	2518.19	2563.56	2610.09	2655.77	2702.58	2750.88	2802.1	2853.62	2904.45	2954.41	3001.74	3049.18	3096.78	3144.5	3191.72	3238	3282.56	3325.89	3368.41	3410.12	3451.46	3492.45	3532.82	3572.45	3611.33	3650.06	3687.98	3725.73	3763.8	3801.47	3838.98
Afghanistan		15.0443	13.6762	12.5828	12.4393	12.7687	13.1199	13.1259	13.0564	13.1687	13.5027	13.5683	13.6719	15.0233	17.0034	18.486	19.445	20.1105	20.7694	21.4516	22.2057	22.4613	22.5075	23.6001	25.0054	25.6976	26.3347	27.1544	27.3871	27.7057	28.4836	29.1207	29.7576
American Samoa		0.03242	0.0336	0.03471	0.03584	0.03709	0.03863	0.04016	0.04188	0.04362	0.04538	0.0472	0.04857	0.04995	0.05138	0.05273	0.05391	0.05496	0.05597	0.05693	0.05785	0.05777	0.05761	0.0574	0.05718	0.05709	0.05695	0.05665	0.05635	0.05605	0.05575	0.05547	0.0552
Australia		14.6159	14.9233	15.1618	15.3481	15.5105	15.6952	15.9004	16.1367	16.4007	16.6806	16.9562	17.2021	17.4189	17.6078	17.7811	17.9756	18.1959	18.4153	18.6208	18.8302	19.0532	19.2943	19.5349	19.7665	19.9951	20.2324	20.4895	20.7496	21.0073	21.2626	21.5158	21.7667
Bangladesh		87.9373	94.1431	96.1853	98.2349	100.28	102.308	104.345	106.382	108.375	110.316	112.213	113.911	115.751	117.621	119.515	121.442	123.433	125.506	127.66	129.879	132.151	134.478	136.87	139.305	141.734	144.139	146.517	148.894	151.29	153.7	156.118	158.571
Bhutan		0.44604	0.46195	0.47824	0.49489	0.51189	0.5292	0.54681	0.56472	0.58289	0.59961	0.61474	0.62504	0.60166	0.57669	0.57472	0.56631	0.56533	0.57484	0.58527	0.59563	0.60587	0.61598	0.62594	0.63576	0.64541	0.6549	0.66421	0.67335	0.68232	0.69114	0.69985	0.70843
Brunei		0.18522	0.19283	0.19886	0.20495	0.21122	0.21784	0.22473	0.23182	0.23888	0.24585	0.25289	0.25925	0.26576	0.27311	0.2805	0.28799	0.29557	0.30311	0.31053	0.3179	0.3253	0.33265	0.33999	0.34726	0.35431	0.36111	0.36782	0.37458	0.38137	0.38819	0.39503	0.40189
Burma (Myanmar)		33.3364	33.9818	34.6422	35.326	36.0354	36.7659	37.5177	38.2877	39.0253	39.7345	40.4636	41.1806	41.7912	42.4374	43.2176	43.994	44.7267	45.4262	46.1108	46.7817	47.4389	48.0811	48.7157	49.3447	49.9622	50.5721	51.1617	51.7558	52.2281	52.8261	53.4144	53.9998
Cambodia		6.88852	7.0792	7.29713	7.53065	7.69058	7.84124	8.10142	8.40395	8.71641	9.03814	9.36752	9.70681	10.1428	10.6242	10.9742	11.2341	11.4846	11.7217	11.9445	12.1547	12.3512	12.5396	12.7292	12.9207	13.1099	13.2974	13.4987	13.7187	13.957	14.2062	14.4537	14.7017
China		984.736	997.001	1012.49	1028.36	1042.76	1058.01	1074.52	1093.73	1112.87	1130.73	1148.36	1163.61	1177.54	1190.76	1203.8	1216.38	1227.88	1238.13	1247.5	1255.99	1263.64	1270.74	1277.59	1284.3	1291	1297.77	1304.26	1310.58	1317.07	1323.59	1330.14	1336.72
Cook Islands		0.01801	0.01765	0.01744	0.01749	0.01774	0.01749	0.01765	0.01767	0.01791	0.01815	0.01839	0.01864	0.01858	0.01851	0.01842	0.01831	0.01818	0.01787	0.01738	0.01686	0.01631	0.01573	0.01515	0.0146	0.01409	0.0136	0.01313	0.01269	0.01227	0.01187	0.01149	0.01112
Fiji		0.63451	0.64677	0.65891	0.67191	0.68557	0.69894	0.71299	0.71967	0.72637	0.73303	0.73962	0.74617	0.75274	0.75933	0.76592	0.77252	0.77889	0.78561	0.79269	0.79908	0.80493	0.81073	0.81667	0.82318	0.82982	0.83656	0.84395	0.85211	0.86054	0.8685	0.87598	0.88313
French Polynesia		0.1509	0.15569	0.16042	0.16532	0.17027	0.17541	0.18064	0.18583	0.19116	0.19577	0.19953	0.20326	0.20683	0.21032	0.21368	0.21684	0.21986	0.22339	0.22745	0.23157	0.23587	0.2401	0.24419	0.24775	0.2508	0.25376	0.2568	0.25984	0.26288	0.26592	0.26882	0.27169
Guam		0.10687	0.10917	0.10928	0.11408	0.1173	0.12062	0.12288	0.12572	0.12755	0.13095	0.13413	0.13816	0.14233	0.14383	0.14316	0.14419	0.14532	0.1468	0.14972	0.15259	0.15532	0.15634	0.15706	0.15758	0.15802	0.1584	0.15871	0.15897	0.15917	0.15932	0.15943	0.1596
Hawaiian Trade Zone		NA	NA	NA	NA	NA	NA	NA	--	--	--	--	--	--	--	--	--	--	--	--	--	--	--	--	--	--	--	--	--	--	--	--	--
Hong Kong		5.0631	5.1834	5.2645	5.3451	5.3979	5.4562	5.5246	5.58451	5.62841	5.66072	5.68796	5.752	5.8297	5.93451	6.06729	6.22535	6.39156	6.49592	6.54456	6.59931	6.65872	6.71338	6.76248	6.80974	6.85513	6.89869	6.94043	6.98041	7.01864	7.05507	7.08971	7.12251
India		684.888	699.154	713.711	728.522	744.017	759.612	775.063	790.64	806.379	822.219	838.159	853.724	870.113	886.744	903.579	920.585	937.725	954.926	972.113	989.25	1006.3	1023.3	1040.28	1057.25	1074.16	1090.97	1107.62	1124.13	1140.57	1156.9	1173.11	1189.17
Indonesia		150.879	154.04	157.214	160.395	163.57	166.718	169.823	172.917	176.038	179.185	182.339	185.515	188.704	191.895	195.142	198.471	201.88	205.183	208.426	211.68	214.858	218.036	221.188	223.348	226.403	229.245	232.199	235.099	237.939	240.715	243.423	246.065
Japan		116.807	117.648	118.455	119.27	120.035	120.754	121.492	122.091	122.613	123.108	123.537	123.963	124.379	124.738	125.047	125.327	125.617	125.925	126.237	126.513	126.776	127.109	127.371	127.552	127.694	127.715	127.728	127.779	127.788	127.704	127.579	127.47
Kiribati		0.05754	0.05845	0.05935	0.06025	0.06115	0.06203	0.06377	0.06559	0.06748	0.06939	0.07129	0.07266	0.07363	0.07467	0.07561	0.07654	0.0779	0.07969	0.08153	0.08334	0.08512	0.08676	0.08826	0.0897	0.09112	0.09259	0.09406	0.09548	0.09686	0.09819	0.09948	0.10074
Korea, North		17.3905	17.6747	17.9522	18.2371	18.5299	18.8307	19.1375	19.4487	19.7689	20.1029	20.4515	20.8126	21.1819	21.563	21.8516	22.1073	22.3236	22.4433	22.4828	22.5943	22.785	22.9774	23.165	23.3305	23.4767	23.6209	23.7644	23.9077	24.0506	24.1909	24.3257	24.4575
Korea, South		38.124	38.723	39.326	39.91	40.406	40.806	41.214	41.622	42.031	42.449	42.869	43.3399	43.8371	44.307	44.7189	45.1051	45.468	45.8078	46.1515	46.4854	46.8388	47.1778	47.4373	47.6566	47.8539	48.0052	48.1236	48.2501	48.3794	48.509	48.6361	48.7547
Laos		3.29316	3.33698	3.41116	3.49496	3.57671	3.65717	3.76177	3.86931	3.97988	4.09357	4.21045	4.33063	4.45418	4.58122	4.71183	4.84612	4.94763	5.0549	5.16765	5.28581	5.39741	5.49852	5.57803	5.654	5.74604	5.83636	5.93079	6.03541	6.14518	6.25687	6.36816	6.47721
Macau		0.25577	0.26093	0.27081	0.28545	0.29898	0.30584	0.3122	0.32298	0.33214	0.34124	0.35176	0.36386	0.37533	0.3844	0.39294	0.4013	0.4104	0.41699	0.42161	0.42777	0.43174	0.43478	0.43898	0.44418	0.45523	0.47403	0.49943	0.52553	0.54567	0.55985	0.56796	0.573
Malaysia		13.4601	13.8752	14.3083	14.7526	15.1979	15.6491	16.1112	16.5789	17.0551	17.472	17.8822	18.3761	18.8619	19.3382	19.835	20.339	20.8567	21.4072	21.9772	22.5534	23.1513	23.7374	24.2826	24.8804	25.4755	25.9681	26.4322	26.8956	27.3578	27.8179	28.2747	28.7286
Maldives		0.15287	0.15725	0.1619	0.16685	0.1721	0.1773	0.18461	0.19221	0.20008	0.2082	0.21661	0.22722	0.23785	0.24691	0.25338	0.26058	0.27053	0.27571	0.28118	0.29148	0.29998	0.30591	0.31186	0.31849	0.3266	0.33625	0.34812	0.36497	0.38593	0.39633	0.39565	0.395
Mongolia		1.66238	1.70883	1.75603	1.805	1.85569	1.9077	1.9608	2.01513	2.07072	2.1606	2.21754	2.27038	2.31795	2.35969	2.40065	2.44704	2.49485	2.53922	2.58152	2.62305	2.66376	2.70447	2.74455	2.78408	2.82457	2.86599	2.9084	2.95179	2.99608	3.04114	3.08692	3.13332
Nauru		0.00771	0.00785	0.008	0.00815	0.00833	0.00852	0.00871	0.00891	0.0091	0.0093	0.00949	0.00967	0.00983	0.00982	0.00982	0.00982	0.00983	0.00987	0.00989	0.00987	0.00986	0.00989	0.00992	0.00993	0.00997	0.01001	0.00957	0.00912	0.00916	0.00921	0.00927	0.00932
Nepal		14.6653	15.0109	15.3751	15.7569	16.1551	16.57	17.0022	17.4527	17.9221	18.4109	18.9183	19.4483	20.0334	20.6414	21.2467	21.8767	22.5026	23.1093	23.7003	24.2699	24.8182	25.3356	25.815	26.2754	26.7083	27.0939	27.459	27.8279	28.197	28.5634	28.9519	29.3919
New Caledonia		0.1394	0.1425	0.145	0.14658	0.14966	0.15259	0.15558	0.15873	0.16194	0.16512	0.1689	0.17333	0.17776	0.18246	0.18745	0.19178	0.19553	0.19938	0.20324	0.20718	0.21119	0.21528	0.21944	0.22369	0.22802	0.2324	0.23651	0.24045	0.24445	0.24841	0.25235	0.25627
New Zealand		3.17015	3.18545	3.2169	3.25845	3.29809	3.32381	3.34063	3.35249	3.36131	3.37754	3.41368	3.4552	3.49355	3.53664	3.5863	3.64218	3.69701	3.73842	3.76431	3.78376	3.8024	3.83788	3.89846	3.96028	4.00817	4.04822	4.08996	4.13234	4.17346	4.21342	4.25228	4.29035
Niue		0.002	0.002	0.002	0.002	0.002	0.002	0.002	0.002	0.002	0.002	0.002	0.002	0.002	0.002	0.002	0.002	0.002	0.002	0.002	0.002	0.002	0.00212	0.00213	0.00215	0.00216	0.00198	0.00182	0.00166	0.00153	0.0014	0.0014	0.0014
Pakistan		85.2191	90.9751	94.0961	96.8814	99.3543	102.079	105.24	108.584	112.021	115.419	118.816	122.248	124.962	127.563	130.746	134.185	137.911	141.446	144.885	148.379	152.429	156.795	160.269	163.166	166.224	169.279	172.382	175.495	178.479	181.457	184.405	187.343
Papua New Guinea		2.8464	2.91716	2.991	3.0676	3.1469	3.22893	3.31375	3.40147	3.49213	3.58588	3.68283	3.78309	3.8866	3.99325	4.1031	4.21589	4.33107	4.44837	4.5678	4.68932	4.81279	4.93745	5.0626	5.18811	5.31389	5.43977	5.56556	5.69109	5.81623	5.94078	6.06452	6.18759
Philippines		50.9402	52.2276	53.5572	54.8854	56.2579	57.7057	59.1859	60.6481	62.0807	63.5547	65.0877	66.5722	67.9778	69.417	70.9446	72.5974	74.3358	76.0571	77.7405	79.4481	81.2221	83.0953	84.9364	86.7517	88.6218	90.4358	92.2669	94.1575	96.0617	97.9766	99.9002	101.834
Samoa		0.15904	0.16092	0.16074	0.16066	0.16066	0.16074	0.16086	0.1611	0.16152	0.1621	0.16283	0.16369	0.1648	0.16612	0.16748	0.16889	0.17033	0.17181	0.17331	0.17476	0.17621	0.17779	0.17943	0.18109	0.18277	0.18449	0.18625	0.18796	0.1895	0.1909	0.192	0.19316
Singapore		2.4139	2.53537	2.65187	2.68926	2.7433	2.7499	2.75007	2.79455	2.86927	2.95775	3.0471	3.15203	3.25601	3.36025	3.46415	3.56668	3.66847	3.76976	3.86848	3.96508	4.06333	4.16948	4.28121	4.39062	4.49823	4.60574	4.71356	4.82192	4.93061	5.0359	5.14011	5.24679
Solomon Islands		0.23077	0.23874	0.24693	0.25535	0.26401	0.27293	0.28212	0.29154	0.30118	0.31104	0.32113	0.33147	0.34204	0.35284	0.36385	0.37507	0.38649	0.39809	0.40984	0.42172	0.43373	0.44591	0.45822	0.47065	0.48317	0.49575	0.50838	0.52107	0.53378	0.54649	0.5592	0.57189
Sri Lanka		15.056	15.3155	15.5145	15.6371	15.7142	15.847	16.0698	16.2875	16.4802	16.6875	16.8617	17.0034	17.2029	17.4487	17.7088	17.9411	18.1508	18.3675	18.5698	18.7929	19.0412	19.2631	19.4787	19.7087	19.9336	20.103	20.3111	20.5076	20.6975	20.8792	21.0838	21.2839
Taiwan		17.8483	18.1774	18.5014	18.8034	19.0833	19.3374	19.5556	19.7578	19.9761	20.2075	20.2782	20.4921	20.6872	20.8861	21.0933	21.2904	21.4577	21.6385	21.8344	22.0078	22.1846	22.3414	22.4619	22.5615	22.6464	22.7276	22.8173	22.9094	22.987	23.0651	23.1266	23.1743
Thailand		47.0258	47.9365	48.8272	49.6942	50.5338	51.3418	52.1295	52.9103	53.6834	54.4457	55.1967	55.9394	56.6834	57.4221	58.1536	58.8828	59.588	60.2476	60.8798	61.432	61.9043	62.3801	62.8569	63.324	63.7839	64.2353	64.6775	65.1099	65.531	65.9399	66.3363	66.7202
Timor-Leste (East Timor)		--	--	--	--	--	--	--	--	--	--	--	--	--	--	--	--	--	--	--	--	--	--	--	0.95597	0.97146	0.9842	0.99959	1.01755	1.03816	1.06153	1.08767	1.11542
Tonga		0.09181	0.09233	0.09288	0.09342	0.09379	0.09438	0.09489	0.09535	0.0957	0.09599	0.09624	0.09647	0.09671	0.09695	0.09718	0.0974	0.0976	0.09805	0.09875	0.09944	0.10013	0.1008	0.10145	0.10209	0.1027	0.1033	0.10387	0.10441	0.10488	0.10529	0.10563	0.10592
U.S. Pacific Islands		NA	NA	NA	NA	NA	NA	NA	NA	NA	NA	NA	NA	NA	NA	NA	NA	NA	NA	NA	NA	NA	NA	NA	NA	NA	NA	NA	NA	NA	NA	NA	NA
Vanuatu		0.11679	0.12026	0.12379	0.12738	0.13103	0.13473	0.13848	0.14227	0.14612	0.15	0.15387	0.15769	0.16147	0.1652	0.16886	0.17245	0.17599	0.17949	0.18294	0.18634	0.19138	0.19651	0.20173	0.20703	0.21241	0.21785	0.22333	0.22882	0.2343	0.23978	0.24525	0.25072
Vietnam		53.7152	54.9027	56.1422	57.4363	58.762	60.0931	61.4398	62.8265	64.2113	65.8685	67.2581	68.6383	69.9797	71.2852	72.5595	73.7834	74.9466	76.0529	77.1075	78.1417	79.178	80.2095	81.258	82.2966	83.3525	84.4249	85.4705	86.5189	87.5584	88.5768	89.5711	90.5494
Wake Island		NA	NA	NA	NA	NA	NA	NA	NA	NA	NA	NA	NA	NA	NA	NA	NA	NA	NA	NA	NA	NA	NA	NA	NA	NA	NA	NA	NA	NA	NA	NA	NA
World		4448.08	4530.87	4610.79	4691.8	4770.41	4852.05	4935.96	5022.44	5109.56	5196.15	5284.88	5367.89	5452.85	5535.24	5619.44	5700.47	5780.88	5859.57	5937.06	6014.16	6090.87	6167.66	6244.44	6320.93	6397.84	6474.66	6552.42	6630.84	6707.6	6785.79	6863.19	6940.14
