# Supplementary material
Source: MDPI journal article supplement (https://www.mdpi.com/1099-4300/15/12/5565)
Supplement: s2 [file s2 › Sources/Raw Data/README.txt]

These raw data files were downloaded from http://www.eia.gov/cfapps/ipdbproject/iedindex3.cfm in June 2013.
If this page disappears, they should be accessible under "International Energy Statistics" at eia.gov.
