# Supplementary material
Source: MDPI journal article supplement (https://www.mdpi.com/1099-4300/15/12/5565)
Supplement: s2 [file s2 › Sources/Raw Data/Total_Biofuels_Consumption_(Thousand_Barrels_Per_Day).xls]

## Sheet: Data3
Table: Total Biofuels Consumption (Thousand Barrels Per Day)
		2000	2001	2002	2003	2004	2005	2006	2007	2008	2009	2010	2011
North America		112.06	118.716	140.785	190.133	237.728	276.675	379.946	494.227	676.278	769.08	890.525	946.29
Bermuda		0	0	0	0	0	0	0	0	0	0	0	0
Canada		4.5	4.5	4.5	4.9	4.9	6	5.4	21.6	25.7	27.81	34.2	47
Greenland		0	0	0	0	0	0	0	0	0	0	0	0
Mexico		0	0	0	0	0	0	0	0.1	0.1	0.103	0.4	0.4
Saint Pierre and Miquelon		0	0	0	0	0	0	0	0	0	0	0	0
United States		107.56	114.216	136.285	185.233	232.828	270.675	374.546	472.527	650.478	741.167	855.925	898.89
Central & South America		168.095	142.598	161.388	145.336	178.318	184.389	201.676	275.608	364.374	438.076	455.467	422.92
Antarctica		0	0	0	0	0	0	0	0	0	0	0	0
Antigua and Barbuda		0	0	0	0	0	0	0	0	0	0	0	0
Argentina		0.1	0.2	0.2	0.2	0.2	0.3	0.3	0.3	0.3	0.55	11.9	17.65
Aruba		0	0	0	0	0	0	0	0	0	0	0	0
Bahamas, The		0	0	0	0	0	0	0	0	0	0	0	0
Barbados		0	0	0	0	0	0	0.0003	0.0003	0.001	0.001	0.001	0.001
Belize		0	0	0	0	0	0	0	0	0	0	0	0
Bolivia		0	0	0	0	0	0	0	0	0	0	0	0
Brazil		166.855	141.378	160.168	144.016	177.118	181.958	195.226	268.478	355.653	420.265	424.336	377.419
Cayman Islands		0	0	0	0	0	0	0	0	0	0	0	0
Chile		0	0	0	0	0	0	0	0	0	0	0	0
Colombia		0	0	0	0	0	0.5	4.6	4.8	5.8	11.3	12	15
Costa Rica		0	0	0	0	0	0	0	0.05	0.05	0.5	0.5	0.4
Cuba		1.1	1	1	1.1	1	1	0.7	0.4	0.3	0.3	0.3	0.3
Dominica		0	0	0	0	0	0	0	0	0	0	0	0
Dominican Republic		0	0	0	0	0	0	0	0	0	0	0	0
Ecuador		0	0	0	0	0	0	0	0	0	0	0.2	0.1
El Salvador		0	0	0	0	0	0	0	0	0	0	0	0
Falkland Islands (Islas Malvinas)		0	0	0	0	0	0	0	0	0	0	0	0
French Guiana		0	0	0	0	0	0	0	0	0	0	0	0
Grenada		0	0	0	0	0	0	0	0	0	0	0	0
Guadeloupe		0	0	0	0	0	0	0	0	0	0	0	0
Guatemala		0	0	0	0	0	0	0	0	0	0.01	0.01	0.02
Guyana		0	0	0	0	0	0	0	0	0	0	0	0
Haiti		0	0	0	0	0	0	0	0	0	0	0	0
Honduras		0	0	0	0	0	0.001	0.01	0.02	0.02	0.01	0.02	0.01
Jamaica		0	0	0	0	0	0	0	0	0.1	1	1	2
Martinique		0	0	0	0	0	0	0	0	0	0	0	0
Montserrat		0	0	0	0	0	0	0	0	0	0	0	0
Netherlands Antilles		0	0	0	0	0	0	0	0	0	0	0	0
Nicaragua		0	0	0	0	0	0	0	0	0	0	0	0
Panama		0	0	0	0	0	0	0	0	0	0	0	0
Paraguay		0.04	0.02	0.02	0.02	0	0.6	0.8	1.1	1.6	2	2.4	2.62
Peru		0	0	0	0	0	0	0	0.4	0.5	2	2.5	5
Puerto Rico		0	0	0	0	0	0	0	0	0	0	0	0
Saint Kitts and Nevis		0	0	0	0	0	0	0	0	0	0	0	0
Saint Lucia		0	0	0	0	0	0	0	0	0	0	0	0
Saint Vincent/Grenadines		0	0	0	0	0	0	0	0	0	0	0	0
Suriname		0	0	0	0	0	0	0	0	0	0	0	0
Trinidad and Tobago		0	0	0	0	0	0	0	0	0	0	0.0001	2
Turks and Caicos Islands		0	0	0	0	0	0	0	0	0	0	0	0
Uruguay		0	0	0	0	0	0.03	0.04	0.06	0.05	0.14	0.3	0.4
Venezuela		0	0	0	0	0	0	0	0	0	0	0	0
Virgin Islands, U.S.		0	0	0	0	0	0	0	0	0	0	0	0
Virgin Islands, British		0	0	0	0	0	0	0	0	0	0	0	0
Europe		16.3	18.72	25.76	33.96	48.17	72.5093	123.021	173.386	238.18	292.545	331.215	343.843
Albania		0	0	0	0	0	0	0	0	0	0	0	0
Austria		0.4	0.4	0.5	0.6	1.1	1.7	6.4	7.7	9.7	12.4	12.5	11.6
Belgium		0	0	0	0	0	0	0.02	2	2.3	7.4	8	7.8
Bosnia and Herzegovina		0	0	0	0	0	0	0	0	0	0	0	0
Bulgaria		0	0	0	0	0	0	0.1	0.04	0.08	0.1	0.4	0.2
Croatia		0	0	0	0	0	0	0	0.06	0.04	0.06	0.1	0.1
Cyprus		0	0	0	0	0	0	0	0.02	0.31	0.33	0.33	0.33
Czech Republic		1.4	1	1.4	1.4	0.7	0.1	0.44	0.704	2.8	4.9	5.8	7.3
Denmark		0	0	0	0	0	0	0.1	0.2	0.205	0.3	1.1	5
Faroe Islands		0	0	0	0	0	0	0	0	0	0	0	0
Finland		0	0	0.02	0.1	0.1	0	0.02	0.103	2.4	3.9	4.5	4.7
Former Czechoslovakia		--	--	--	--	--	--	--	--	--	--	--	--
Former Serbia and Montenegro		0	0	0	0	0	0	--	--	--	--	--	--
Former Yugoslavia		--	--	--	--	--	--	--	--	--	--	--	--
France		8	7.86	8.32	7.57	8.18	9.52	18.4	34.3	54.6	59	55	56.5
Germany		4.9	6.8	10.8	15.7	21.9	40.7	67	74	66	68	75.5	73.9
Germany, East		--	--	--	--	--	--	--	--	--	--	--	--
Germany, West		--	--	--	--	--	--	--	--	--	--	--	--
Gibraltar		0	0	0	0	0	0	0	0	0	0	0	0
Greece		0	0	0	0	0	0.06	1	1.9	1.5	1.7	2.8	2.3
Hungary		0	0	0	0	0	0.1	0.407	0.94	4.2	4.3	4.6	4.2
Iceland		0	0	0	0	0	0	0	0	0.005	0.005	0.005	0.003
Ireland		0	0	0	0	0	0.0203	0.06	0.6	1.4	2	2.3	2.5
Italy		0	0	0	0	5.6	4.1	4.6	4.2	16	27.3	35.2	35.9
Luxembourg		0	0	0	0	0	0.01	0.01	0.73	0.83	0.92	0.92	1
Macedonia		0	0	0	0	0	0	0	0	0.01	0.01	0.01	0.01
Malta		0	0	0	0	0	0.016	0.018	0.039	0.02	0.01	0	0
Montenegro		--	--	--	--	--	--	0	0	0	0	0	0
Netherlands		0	0	0	0.07	0.07	0.05	1.09	7.8	7.57	9.8	6.6	8.8
Norway		0	0	0	0	0.1	0.1	0.1	0.68	1.88	2.2	2.7	2.6
Poland		0	0	0	1	0.5	1.3	2.6	2.5	11	13	18	20
Portugal		0	0	0	0	0	0.003	1.6	3	2.8	5	7	7
Romania		0	0	0	0	0	0	0.5	0.9	2.6	4.7	6.4	5.2
Serbia		--	--	--	--	--	--	0	0.5	1	1.5	1.5	1.5
Slovakia		0	0.6	0.1	0.04	0.02	0.2	0.94	2	3.1	3.7	4	4.1
Slovenia		0	0	0	0	0	0.11	0.096	0.31	0.57	0.68	1	0.7
Spain		1.6	1.6	3.5	5	5.2	7.2	5.2	9.9	15	25	34	40
Sweden		0	0.46	1.06	2.18	4.2	4.5	6.5	8.4	10.1	10	11	12
Switzerland		0	0	0	0	0.1	0.12	0.22	0.26	0.26	0.13	0.25	0.6
Turkey		0	0	0	0	0	0.5	1.1	1	1.1	0.7	0.7	0.8
United Kingdom		0	0	0.06	0.3	0.4	2.1	4.5	8.6	18.8	23.5	29	27.2
Eurasia		0	0	0	0	0.02	0.235	0.594	1.3914	1.8886	1.98	2.6	3
Armenia		0	0	0	0	0	0	0	0	0	0	0	0
Azerbaijan		0	0	0	0	0	0	0	0	0	0	0	0
Belarus		0	0	0	0	0	0	0	0	0.2	0.5	0.7	0.8
Estonia		0	0	0	0	0	0	0.014	0.0114	0.108	0	0	0
Former U.S.S.R.		--	--	--	--	--	--	--	--	--	--	--	--
Georgia		0	0	0	0	0	0	0	0	0	0	0	0
Kazakhstan		0	0	0	0	0	0	0	0	0	0	0	0
Kyrgyzstan		0	0	0	0	0	0	0	0	0	0	0	0
Latvia		0	0	0	0	0	0.115	0.08	0.06	0.0406	0.18	0.7	1.1
Lithuania		0	0	0	0	0.02	0.12	0.5	1.32	1.54	1.3	1.2	1.1
Moldova		0	0	0	0	0	0	0	0	0	0	0	0
Russia		0	0	0	0	0	0	0	0	0	0	0	0
Tajikistan		0	0	0	0	0	0	0	0	0	0	0	0
Turkmenistan		0	0	0	0	0	0	0	0	0	0	0	0
Ukraine		0	0	0	0	0	0	0	0	0	0	0	0
Uzbekistan		0	0	0	0	0	0	0	0	0	0	0	0
Middle East		0	0	0	0	0	0	0	0.1	0.1	0.1	0.1	0.1
Bahrain		0	0	0	0	0	0	0	0	0	0	0	0
Iran		0	0	0	0	0	0	0	0	0	0	0	0
Iraq		0	0	0	0	0	0	0	0	0	0	0	0
Israel		0	0	0	0	0	0	0	0.1	0.1	0.1	0.1	0.1
Jordan		0	0	0	0	0	0	0	0	0	0	0	0
Kuwait		0	0	0	0	0	0	0	0	0	0	0	0
Lebanon		0	0	0	0	0	0	0	0	0	0	0	0
Oman		0	0	0	0	0	0	0	0	0	0	0	0
Palestinian Territories		0	0	0	0	0	0	0	0	0	0	0	0
Qatar		0	0	0	0	0	0	0	0	0	0	0	0
Saudi Arabia		0	0	0	0	0	0	0	0	0	0	0	0
Syria		0	0	0	0	0	0	0	0	0	0	0	0
United Arab Emirates		0	0	0	0	0	0	0	0	0	0	0	0
Yemen		0	0	0	0	0	0	0	0	0	0	0	0
Africa		0.2	0.2	0.2	0.2	0.2	0.1	0.1	0.4	0.635	0.18	0.23	1.301
Algeria		0	0	0	0	0	0	0	0	0	0	0	0
Angola		0	0	0	0	0	0	0	0	0	0	0	0
Benin		0	0	0	0	0	0	0	0	0	0	0	0
Botswana		0	0	0	0	0	0	0	0	0	0	0	0
Burkina Faso		0	0	0	0	0	0	0	0	0	0	0	0
Burundi		0	0	0	0	0	0	0	0	0	0	0	0
Cameroon		0	0	0	0	0	0	0	0	0	0	0	0
Cape Verde		0	0	0	0	0	0	0	0	0	0	0	0
Central African Republic		0	0	0	0	0	0	0	0	0	0	0	0
Chad		0	0	0	0	0	0	0	0	0	0	0	0
Comoros		0	0	0	0	0	0	0	0	0	0	0	0
Congo (Brazzaville)		0	0	0	0	0	0	0	0	0	0	0	0
Congo (Kinshasa)		0	0	0	0	0	0	0	0	0	0	0	0
Cote dIvoire (IvoryCoast)		0	0	0	0	0	0	0	0	0	0	0	0
Djibouti		0	0	0	0	0	0	0	0	0	0	0	0
Egypt		0	0	0	0	0	0	0	0	0	0	0	0
Equatorial Guinea		0	0	0	0	0	0	0	0	0	0	0	0
Eritrea		0	0	0	0	0	0	0	0	0	0	0	0
Ethiopia		0	0	0	0	0	0	0	0	0.03	0.03	0.05	0.05
Gabon		0	0	0	0	0	0	0	0	0	0	0	0
Gambia, The		0	0	0	0	0	0	0	0	0	0	0	0
Ghana		0	0	0	0	0	0	0	0	0	0	0	0
Guinea		0	0	0	0	0	0	0	0	0	0	0	0
Guinea-Bissau		0	0	0	0	0	0	0	0	0	0	0	0
Kenya		0	0	0	0	0	0	0	0	0	0	0	0
Lesotho		0	0	0	0	0	0	0	0	0	0	0	0
Liberia		0	0	0	0	0	0	0	0	0	0	0	0
Libya		0	0	0	0	0	0	0	0	0	0	0	0
Madagascar		0	0	0	0	0	0	0	0	0	0	0	0
Malawi		0.2	0.2	0.2	0.2	0.2	0.1	0.1	0.1	0.1	0.1	0.1	0.1
Mali		0	0	0	0	0	0	0	0	0	0	0	0
Mauritania		0	0	0	0	0	0	0	0	0	0	0	0
Mauritius		0	0	0	0	0	0	0	0	0	0	0	0
Morocco		0	0	0	0	0	0	0	0	0	0	0	0
Mozambique		0	0	0	0	0	0	0	0	0	0	0	0
Namibia		0	0	0	0	0	0	0	0	0	0	0	0
Niger		0	0	0	0	0	0	0	0	0	0	0	0
Nigeria		0	0	0	0	0	0	0	0.3	0.5	0	0	1
Reunion		0	0	0	0	0	0	0	0	0	0	0	0
Rwanda		0	0	0	0	0	0	0	0	0	0	0.01	0.01
Saint Helena		0	0	0	0	0	0	0	0	0	0	0	0
Sao Tome and Principe		0	0	0	0	0	0	0	0	0	0	0	0
Senegal		0	0	0	0	0	0	0	0	0	0	0	0
Seychelles		0	0	0	0	0	0	0	0	0	0	0	0
Sierra Leone		0	0	0	0	0	0	0	0	0	0	0	0
Somalia		0	0	0	0	0	0	0	0	0	0	0	0
South Africa		0	0	0	0	0	0	0	0	0.005	0.04	0.06	0.13
Sudan and South Sudan		0	0	0	0	0	0	0	0	0	0	0	0
Swaziland		0	0	0	0	0	0	0	0	0	0	0	0
Tanzania		0	0	0	0	0	0	0	0	0	0.01	0.01	0.01
Togo		0	0	0	0	0	0	0	0	0	0	0	0
Tunisia		0	0	0	0	0	0	0	0	0	0	0	0
Uganda		0	0	0	0	0	0	0	0	0	0	0	0
Western Sahara		0	0	0	0	0	0	0	0	0	0	0	0
Zambia		0	0	0	0	0	0	0	0	0	0	0	0
Zimbabwe		0	0	0	0	0	0	0	0	0	0	0	0.001
Asia & Oceania		2.9	3.1	8.32	17.44	21.3	27.88	42.0605	45.79	68.85	83.1501	92.0705	102.35
Afghanistan		0	0	0	0	0	0	0	0	0	0	0	0
American Samoa		0	0	0	0	0	0	0	0	0	0	0	0
Australia		0	0	0	0	0.1	0.7	1.6	2.2	3.5	5.4	8	9.1
Bangladesh		0	0	0	0	0	0	0	0	0	0	0	0
Bhutan		0	0	0	0	0	0	0	0	0	0	0	0
Brunei		0	0	0	0	0	0	0	0	0	0	0	0
Burma (Myanmar)		0	0	0	0	0	0	0	0	0	0	0	0
Cambodia		0	0	0	0	0	0	0	0	0	0.0001	0.0005	0.0005
China		0	0.1	5.1	13.9	17.3	21.5	32	30.7	39.4	43	43	45
Cook Islands		0	0	0	0	0	0	0	0	0	0	0	0
Fiji		0	0	0	0	0	0	0	0	0	0	0.01	0.03
French Polynesia		0	0	0	0	0	0	0	0	0	0	0	0
Guam		0	0	0	0	0	0	0	0	0	0	0	0
Hawaiian Trade Zone		--	--	--	--	--	--	--	--	--	--	--	--
Hong Kong		0	0	0	0	0	0	0	0	0	0	0.1	0.1
India		2.9	3	3.2	3.3	3.5	3.9	4.5	4.7	5.2	3	3	8
Indonesia		0	0	0	0	0	0.04	0.3	0.6	1.2	2.2	4	5
Japan		0	0	0	0.2	0.2	0.2	0.2005	0.3	0.3	0.7	1.3	2.3
Kiribati		0	0	0	0	0	0	0	0	0	0	0	0
Korea, North		0	0	0	0	0	0	0	0	0	0	0	0
Korea, South		0	0	0.02	0.04	0.1	0.2	0.9	1.7	3.2	5	6.6	6.5
Laos		0	0	0	0	0	0	0	0	0	0	0	0
Macau		0	0	0	0	0	0	0	0	0	0	0	0
Malaysia		0	0	0	0	0	0	0.2	0.7	0.9	0.1	0.1	0.04
Maldives		0	0	0	0	0	0	0	0	0	0	0	0
Mongolia		0	0	0	0	0	0	0	0	0	0	0	0
Nauru		0	0	0	0	0	0	0	0	0	0	0	0
Nepal		0	0	0	0	0	0	0	0	0	0	0	0
New Caledonia		0	0	0	0	0	0	0	0	0	0	0	0
New Zealand		0	0	0	0	0	0	0	0.02	0.12	0.12	0.12	0.14
Niue		0	0	0	0	0	0	0	0	0	0	0	0
Pakistan		0	0	0	0	0	0	0	0	0	0	0.2	0.2
Papua New Guinea		0	0	0	0	0	0	0	0	0	0	0	0
Philippines		0	0	0	0	0	0.04	0.06	0.67	1.2	4	5.4	6.5
Samoa		0	0	0	0	0	0	0	0	0	0	0	0
Singapore		0	0	0	0	0	0	0	0	0	0.03	0.04	0.04
Solomon Islands		0	0	0	0	0	0	0	0	0	0	0	0
Sri Lanka		0	0	0	0	0	0	0	0	0	0	0	0
Taiwan		0	0	0	0	0	0	0	0.1	0.63	1.1	2.1	1.7
Thailand		0	0	0	0	0.1	1.3	2.3	4.1	13.2	18.5	18	17.2
Timor-Leste (East Timor)		--	--	--	0	0	0	0	0	0	0	0	0
Tonga		0	0	0	0	0	0	0	0	0	0	0	0
U.S. Pacific Islands		0	0	0	0	0	0	0	0	0	0	0	0
Vanuatu		0	0	0	0	0	0	0	0	0	0	0	0
Vietnam		0	0	0	0	0	0	0	0	0	0	0.1	0.5
Wake Island		0	0	0	0	0	0	0	0	0	0	0	0
World		299.555	283.334	336.453	387.069	485.737	561.788	747.398	990.903	1350.31	1585.11	1772.21	1819.8
