# Supplementary material
Source: MDPI journal article supplement (https://www.mdpi.com/1099-4300/15/12/5565)
Supplement: s2 [file s2 › Sources/Raw Data/Total_Carbon_Dioxide_Emissions_from_the_Consumption_of_Energy_(Million_Metric_Tons).xls]

## Sheet: Data3
Table: Total Carbon Dioxide Emissions from the Consumption of Energy (Million Metric Tons)
		1980	1981	1982	1983	1984	1985	1986	1987	1988	1989	1990	1991	1992	1993	1994	1995	1996	1997	1998	1999	2000	2001	2002	2003	2004	2005	2006	2007	2008	2009	2010	2011
Bermuda		0.5307	0.45967	0.48832	0.51577	0.50344	0.4955	0.50418	0.70882	0.77465	0.94282	0.65741	0.54808	0.44851	0.52483	0.51374	0.51203	0.52149	0.52145	0.52137	0.52137	0.52154	0.51983	0.52142	0.56133	0.60643	0.64892	0.64298	0.7509	0.75025	0.71151	0.69942	0.77688
Canada		457.449	442.086	423.273	410.644	433.619	443.671	427.816	445.227	478.052	492.567	470.587	465.792	484.976	485.458	495.324	508.735	519.989	544.909	549.301	566.382	573.273	561.879	567.56	597.004	611.566	623.75	598.279	593.09	578.248	549.684	546.652	552.557
Greenland		NA	NA	NA	NA	NA	NA	NA	NA	NA	NA	NA	NA	0.50022	0.51692	0.52169	0.52156	0.52932	0.54054	0.54834	0.54834	0.56108	0.57697	0.58335	0.58648	0.59469	0.60237	0.61509	0.59981	0.6417	0.64787	0.64841	0.61108
Mexico		240.334	266.512	282.143	260.786	279.14	280.695	267.492	277.678	276.852	290.774	302.158	309.802	313.351	316.827	336.392	321.374	332.658	349.4	371.307	363.385	382.897	379.553	379.08	387.96	378.027	397.806	436.954	444.27	452.794	421.124	432.21	462.293
Saint Pierre and Miquelon		0.1471	0.14746	0.13447	0.14806	0.14387	0.12674	0.17244	0.22284	0.23302	0.26553	0.26089	0.24788	0.23208	0.12718	0.13038	0.08584	0.08584	0.0604	0.06992	0.06992	0.07628	0.06993	0.06993	0.07628	0.08263	0.08264	0.08581	0.08914	0.09159	0.08899	0.08899	0.09143
United States		4775.82	4647.05	4411.26	4388.78	4619.15	4605.15	4613.12	4770.9	4990.51	5071.65	5040.37	4997.43	5093.41	5187.98	5261.19	5319.05	5504.41	5577.5	5616.57	5677.92	5863.26	5754.55	5799.09	5853.03	5974.23	5999.24	5924.29	6026.28	5844.58	5435.28	5636.74	5490.63
Antarctica		0.14064	0.14025	0.14626	0.14025	0.18242	0.20066	0.19826	0.20455	0.21084	0.2077	0.21084	0.22028	0.22251	0.22251	0.22251	0.22887	0.22887	0.22887	0.22887	0.22887	0.22887	0.23204	0.23204	0.2384	0.2384	0.2543	0.2543	0.24476	0.26439	0.24476	0.07208	0.13689
Antigua and Barbuda		0.40738	0.3631	0.48629	0.28797	0.32287	0.30874	0.32274	0.39148	0.39549	0.40406	0.42269	0.41483	0.41885	0.44124	0.46346	0.47592	0.47577	0.49494	0.49485	0.49485	0.51092	0.51252	0.51417	0.54611	0.59272	0.64686	0.65485	0.631	0.65897	0.66632	0.66584	0.73159
Argentina		92.8365	90.1753	96.4501	98.2148	103.82	97.4531	103.526	110.108	111.659	112.509	102.662	108.852	109.907	119.853	116.525	119.792	130.11	130.316	136.057	140.08	138.377	128.339	121.175	134.164	140.85	151.864	157.282	168.937	171.476	170.494	174.393	190.605
Aruba		--	--	--	--	--	--	0.10793	0.10793	0.42118	0.55699	0.5941	0.63341	0.68587	0.70362	0.75001	0.87273	0.57391	0.91418	0.92199	0.92199	0.95775	0.95768	0.9577	1.01689	1.02815	1.04849	1.13017	1.04743	1.07222	1.03984	1.03984	1.23696
Bahamas, The		3.99007	4.26559	3.61972	2.71191	2.45503	2.22598	2.41417	2.67455	2.44508	2.80694	2.98911	2.58066	2.22062	2.32305	2.68113	3.17928	3.57796	3.54117	4.04494	3.62272	3.50107	3.42356	3.42089	4.18647	4.25074	4.91423	4.9047	4.66166	5.07692	3.60306	3.60306	4.73401
Barbados		0.96807	1.02751	1.02151	1.07832	1.03956	1.14641	1.29527	1.22225	1.16025	1.2484	1.3016	1.31138	1.34995	1.35547	1.27218	1.33596	1.05111	1.44435	1.47581	1.51249	1.7058	1.64932	1.64973	1.68089	1.15756	1.52851	1.48817	1.3733	1.49191	1.51017	1.40965	1.44169
Belize		0.2255	0.20645	0.19291	0.19482	0.21137	0.21131	0.263	0.20872	0.1509	0.2187	0.31315	0.34972	0.304	0.30071	0.28482	0.32932	0.27119	0.43918	0.43891	0.44527	0.65973	0.86332	0.80791	0.84879	0.90596	0.96631	0.96806	1.0286	1.03903	0.46869	0.46837	0.5363
Bolivia		4.4629	4.65224	4.07695	4.49	4.25214	3.78484	3.84292	3.72856	4.17724	4.79929	5.06781	4.92727	6.23804	6.74878	8.14745	7.65578	7.28746	7.96358	7.56175	8.74322	9.25638	8.03854	9.36866	11.6995	11.7313	11.5609	12.806	12.9639	14.0028	13.0047	13.2584	13.9763
Brazil		185.664	175.218	172.752	163.797	180.868	192.661	212.674	219.159	221.456	226.765	237.332	245.69	237.399	257.965	269.077	289.087	306.683	325.449	324.114	335.709	344.434	348.511	346.622	345.8	355.729	370.757	383.85	401.172	427.402	406.967	450.951	475.409
Cayman Islands		0.0978	0.10546	0.1055	0.10254	0.10581	0.10871	0.11004	0.10918	0.26593	0.26988	0.27439	0.29461	0.3025	0.28641	0.31201	0.3378	0.34018	0.34016	0.34644	0.34644	0.34331	0.34648	0.34654	0.35924	0.38617	0.40687	0.46243	0.52843	0.48557	0.55311	0.55628	0.59276
Chile		23.8529	23.1508	19.5918	19.8957	20.6508	20.5129	19.229	20.3866	23.9129	29.6089	31.866	30.5193	31.5484	33.3963	36.7488	40.1548	45.4554	53.8115	54.1975	59.4725	54.6224	54.0772	52.8773	56.7791	63.2842	67.051	69.9084	61.0176	66.7253	73.852	79.1952	80.0963
Colombia		39.658	40.972	41.7657	42.9304	45.6404	45.2529	45.1298	42.6768	47.1832	47.6172	41.4249	47.8433	53.6451	55.0922	53.8346	54.0148	56.8872	62.7949	64.3494	57.7375	57.6946	56.5179	55.4083	57.1119	55.8384	60.0925	61.0659	60.4609	63.139	63.4801	65.9582	71.1537
Costa Rica		2.26757	2.26251	2.11982	2.25348	1.97356	2.08542	1.99355	2.31773	2.71692	2.88596	2.73905	2.89316	3.64487	3.97534	4.03476	4.7159	4.46911	4.47627	5.00066	5.13568	5.00516	5.22245	5.3884	5.95484	5.72251	5.65277	6.63534	7.22005	7.13781	6.92894	7.02554	6.80576
Cuba		29.9412	30.5022	33.0496	30.1752	31.316	31.993	34.9714	34.424	35.0975	36.2736	35.3805	32.5274	28.8732	28.6174	29.121	30.8434	30.2366	33.5256	32.6025	33.3105	32.8606	33.2569	34.1108	33.2436	33.1437	28.5883	25.2178	26.3714	29.1058	29.2708	28.3375	28.4104
Dominica		0.02679	0.03498	0.03502	0.03498	0.03501	0.03991	0.04022	0.04337	0.05548	0.05862	0.05852	0.05845	0.05909	0.06224	0.07183	0.08101	0.08119	0.08116	0.0843	0.0843	0.07958	0.10183	0.11139	0.12085	0.10804	0.0924	0.11758	0.12125	0.12709	0.12966	0.12966	0.14157
Dominican Republic		5.43528	5.22474	5.58116	6.74508	5.91215	6.62825	6.86647	8.07931	8.55454	8.15095	9.06125	9.22165	10.3396	9.1879	9.88486	11.02	11.6155	12.2368	12.677	14.3606	15.7977	16.5867	17.1395	19.5448	18.1153	17.4389	18.4315	19.1599	19.3969	18.2019	18.6675	20.6397
Ecuador		12.7843	13.4394	14.5781	12.9132	12.8062	13.5287	14.7793	13.5961	14.6461	13.9283	15.0875	15.8754	18.3928	16.6175	17.9994	19.2872	19.7337	20.1555	21.4527	19.5646	20.0808	21.5202	21.7254	22.4299	23.5288	24.6545	26.5512	26.512	27.1163	30.4128	32.7011	29.1319
El Salvador		1.9921	1.7285	1.65117	1.82891	1.84834	1.93666	2.18682	2.15943	2.31694	2.22631	2.39073	2.75258	3.2204	3.23388	3.62436	4.65097	4.39066	4.68446	5.48114	5.48183	5.5092	5.7021	5.76625	6.07921	6.02339	6.21059	6.23474	6.32433	5.93183	5.93246	5.91636	6.71283
Falkland Islands (Islas Malvinas)		0.01168	0.01151	0.01151	0.01151	0.01154	0.01442	0.01598	0.01598	0.03171	0.02833	0.02519	0.02519	0.02544	0.02544	0.02545	0.02861	0.03178	0.03496	0.0286	0.0286	0.0286	0.0286	0.03178	0.03177	0.03505	0.03813	0.04129	0.04768	0.04578	0.04764	0.04764	0.04574
French Guiana		0.34991	0.30226	0.38439	0.39059	0.31189	0.31388	0.38459	0.4336	0.51416	0.57669	0.68492	0.77451	0.63251	0.86881	0.86885	0.96838	0.96818	0.96812	0.98408	0.98408	0.9969	0.99689	1.02068	1.06565	1.0394	1.06083	1.11547	1.07343	1.05598	0.82375	0.98675	1.06401
Grenada		0.04574	0.05254	0.05828	0.05632	0.05836	0.05954	0.06935	0.07109	0.07745	0.08059	0.12319	0.12305	0.12746	0.14013	0.16393	0.15434	0.16752	0.21036	0.19063	0.19063	0.11806	0.20108	0.2335	0.23815	0.24205	0.2478	0.26042	0.26138	0.28688	0.27073	0.26951	0.26896
Guadeloupe		0.48529	0.68799	0.87326	0.91835	1.01304	0.9263	0.93736	1.09392	1.20193	1.33446	1.44216	1.51019	1.38962	1.61957	1.66579	1.7088	1.69541	1.71627	1.71586	1.71586	1.80679	1.83416	1.86624	1.93692	1.99515	2.07825	2.19169	2.47748	2.35198	2.12595	2.12595	2.46248
Guatemala		4.15611	3.61168	3.53147	3.66336	3.21584	3.62142	3.22797	3.23943	3.50631	3.5813	3.78412	3.57455	4.35516	4.79358	5.44291	6.07474	6.31484	6.95524	8.4839	8.69116	9.05973	10.0075	10.2678	10.3918	10.634	11.0887	11.1551	11.7727	10.9856	11.8529	11.3585	11.7073
Guyana		1.42148	1.63947	1.3226	1.17089	1.3369	1.35217	1.3968	1.06234	1.05352	0.69718	0.67349	0.79366	0.88141	1.15461	1.15425	0.9699	1.0351	1.12667	1.43542	1.531	1.68536	1.73097	1.75743	1.70908	1.5364	1.69089	1.59766	1.59297	1.52034	1.64218	1.6339	1.67262
Haiti		0.84969	0.56629	0.80351	0.71518	0.72799	0.83529	0.81484	1.2878	1.42459	1.24867	0.74325	0.7909	0.8828	0.6214	0.54018	0.93791	1.11355	1.44478	1.33549	1.48134	1.51811	1.65113	1.7093	1.70261	1.74775	1.75899	1.80374	1.98819	2.00563	2.24946	2.11973	2.10309
Honduras		1.69779	1.51065	1.53508	1.63712	1.66445	1.57046	1.7311	1.71037	1.959	2.37283	2.72721	2.6655	2.73735	2.72202	3.00279	3.47004	3.89316	3.82515	4.35604	4.86482	4.58271	5.31338	5.96223	6.00085	7.01076	7.27303	7.50766	8.30631	7.95931	7.25922	7.58868	7.97487
Jamaica		7.78939	6.69594	5.65662	6.01202	5.0075	4.49533	4.86304	5.22076	6.10535	7.05784	7.53755	7.82343	8.51804	8.63255	8.86711	9.96174	10.079	10.5333	10.8957	11.2181	10.8288	10.9023	11.1532	11.5802	11.6172	11.2395	12.5814	13.2325	12.62	9.23925	9.17691	9.55675
Martinique		0.63457	0.63173	0.62826	0.62036	0.55208	0.67268	0.75959	0.85701	1.03203	1.45639	1.56909	1.29992	1.46846	2.01132	1.97916	2.01818	2.0249	2.02184	2.02485	2.02485	2.05658	2.05595	2.07955	2.17065	2.24273	2.3617	2.3803	2.46868	2.45345	2.67338	2.67674	2.85287
Montserrat		0.01688	0.01937	0.01937	0.01937	0.0194	0.02098	0.02204	0.02518	0.02834	0.02835	0.03779	0.03466	0.04137	0.04138	0.0414	0.0477	0.0445	0.04767	0.05083	0.05083	0.05402	0.05402	0.05403	0.06036	0.06671	0.06989	0.07625	0.08302	0.09267	0.08324	0.08324	0.08786
Netherlands Antilles		15.9868	14.7923	14.1668	13.135	12.4442	10.4131	10.0954	10.3893	9.48166	9.8284	9.74432	9.2084	9.54981	9.24977	9.64825	11.4086	11.4104	12.0516	12.0116	11.7084	11.6174	11.7091	10.7886	10.7732	10.8898	10.8154	11.9886	10.825	10.5924	12.2053	11.555	10.8142
Nicaragua		1.84261	1.90905	1.91126	1.8196	1.73757	1.97241	2.09757	2.08776	2.11591	2.1046	2.0117	1.92524	2.34501	2.3025	2.52185	2.77647	2.92613	3.01875	3.46728	3.74068	3.70306	3.94495	4.05225	4.11267	4.42324	4.59643	4.75781	4.71067	4.50239	4.49305	4.46067	5.03452
Panama		5.39492	5.23984	4.73327	5.01632	4.89827	3.60891	11.2711	11.726	11.3038	11.1456	11.7987	11.832	12.2349	12.0341	13.5377	14.4487	12.4184	12.7753	13.9788	13.0623	12.9375	13.4555	12.6812	12.612	14.1528	14.8188	14.8768	15.1649	14.9823	15.872	17.5035	15.9
Paraguay		1.386	1.27438	1.24988	1.31962	1.44077	1.45881	1.52199	1.92753	1.72482	2.30977	2.19678	2.02319	2.3256	2.4693	2.9009	3.33952	2.69952	2.95781	3.3738	3.81179	3.56069	3.45352	3.59775	3.73401	3.75238	3.69013	3.6848	3.73268	3.82742	4.0942	4.44334	3.98687
Peru		21.83	22.7747	26.1403	24.0224	22.8099	22.8253	25.4726	24.6031	24.7658	21.4124	20.0953	18.8853	20.1395	22.2541	23.2271	24.7304	25.715	25.3622	26.0313	26.6362	26.9185	26.0948	26.1744	26.4741	29.5782	31.2933	33.791	33.7371	36.2866	37.0456	41.8854	37.71
Puerto Rico		28.8783	31.0302	22.6923	22.082	24.3749	21.0703	22.9682	24.091	21.61	20.4548	20.2253	24.0209	23.3429	24.4812	25.2554	24.2754	24.2137	24.9699	27.5099	26.3402	27.7156	34.5412	35.2247	37.4466	38.2002	37.7922	37.8665	34.1724	34.3708	28.9928	32.3525	28.525
Saint Kitts and Nevis		0.05054	0.05339	0.0616	0.05047	0.05054	0.05041	0.05351	0.05665	0.0661	0.06612	0.06612	0.07555	0.07632	0.08587	0.10177	0.09229	0.10485	0.10483	0.10481	0.10481	0.10482	0.10482	0.10483	0.11751	0.13021	0.13657	0.18106	0.25779	0.27314	0.27004	0.27004	0.30269
Saint Lucia		0.11181	0.08778	0.10585	0.09704	0.09722	0.12107	0.12372	0.13339	0.16775	0.16773	0.16753	0.16739	0.17552	0.17228	0.19308	0.19599	0.1959	0.2054	0.20532	0.20532	0.33248	0.34839	0.35487	0.38809	0.36954	0.37576	0.37762	0.40943	0.43082	0.41273	0.41273	0.4249
Saint Vincent/Grenadines		0.03793	0.03498	0.03796	0.03791	0.03501	0.0398	0.03975	0.04279	0.05135	0.07599	0.07812	0.07565	0.08287	0.07644	0.12186	0.12554	0.12548	0.13354	0.16369	0.16369	0.16682	0.17	0.17798	0.18587	0.19721	0.19864	0.19231	0.19613	0.22615	0.19548	0.19548	0.19889
Suriname		2.09187	1.80674	1.60646	1.16512	0.97745	1.24483	1.31957	1.16458	1.11417	1.19232	1.5069	1.48952	1.43623	1.49598	1.48753	1.51083	1.49554	1.5219	1.53537	1.53537	1.60936	1.69661	1.78739	1.83301	1.9113	1.97127	2.02972	1.99605	1.95248	2.05052	2.00794	2.33469
Trinidad and Tobago		10.5581	10.1047	9.87596	15.0579	16.0541	17.8554	16.7824	16.9769	17.209	17.4347	18.1852	18.6123	17.4044	19.2791	21.7447	22.6259	24.2052	25.7049	25.5344	26.2595	27.5106	30.0099	30.8881	29.7793	32.561	39.249	47.2011	46.6432	49.5557	47.8278	52.3001	52.0686
Turks and Caicos Islands		NA	NA	NA	NA	NA	NA	NA	NA	NA	NA	NA	NA	NA	NA	NA	NA	NA	NA	NA	NA	NA	0.01661	0.01284	0.01284	0.01284	0.01284	0.01238	0.07311	0.07776	0.16529	0.16529	0.15553
Uruguay		5.76053	5.19486	4.92066	3.8934	3.69454	3.45021	3.45059	3.98079	4.7169	4.88452	4.49892	4.24131	4.52344	4.94846	4.65823	4.66325	4.94778	5.22613	6.40292	7.26775	6.51914	4.9478	5.37004	5.56014	6.03891	6.28745	7.37054	7.03294	8.00138	9.06087	8.46518	8.32609
Venezuela		94.2653	101.531	101.607	96.0946	96.1424	96.4004	104.328	105.709	104.063	108.018	109.727	111.479	111.722	113.541	119.406	124.408	133.287	134.959	142.29	128.624	134.449	148.696	146.699	133.645	143.381	145.878	150.552	152.67	161.794	157.56	174.157	182.661
Virgin Islands, U.S.		16.9395	15.1371	11.0002	7.74079	9.00394	10.1212	6.65437	7.93927	5.25864	7.76805	7.4522	7.96444	8.34233	8.39561	8.36195	8.55112	8.52571	8.28941	8.74503	8.87949	9.83616	13.6362	13.0569	14.5792	17.6635	15.621	16.5845	14.7472	12.934	15.2108	15.5639	18.5938
Virgin Islands, British		0.02217	0.03498	0.03468	0.03498	0.0321	0.03275	0.03777	0.04407	0.04723	0.05039	0.05039	0.05039	0.0541	0.05411	0.05413	0.05406	0.0604	0.06039	0.06036	0.06036	0.06038	0.06038	0.06039	0.0699	0.08895	0.09531	0.10166	0.11116	0.11827	0.11372	0.11372	0.14719
Albania		8.85858	8.86997	8.82775	9.08935	9.23048	9.30827	9.31318	8.81182	9.15808	8.20548	6.07468	4.38982	3.78002	2.82149	2.25899	2.34312	1.96682	1.92291	2.29608	2.94514	3.26206	3.57044	3.75629	4.21756	4.35083	4.62263	4.55077	4.38741	4.37229	2.81575	3.80124	4.18272
Austria		55.8411	54.492	51.0709	51.0635	54.3608	55.07	53.8386	54.9637	52.6903	52.8684	55.708	60.2017	56.941	58.3717	57.7842	59.2694	64.9119	64.3373	67.2298	64.75	63.8387	67.7216	70.6607	74.1132	75.5419	77.4961	73.1833	72.5758	71.1861	65.5818	69.3009	67.1822
Belgium		135.694	138.052	129.162	114.295	118.771	119.242	120.683	119.857	117.023	123.517	125.272	129.943	124.416	125.719	135.294	138.835	142.649	145.516	150.72	143.033	148.103	145.292	142.215	150.916	153.354	150.83	142.329	141.718	154.744	132.748	136.248	131.063
Bosnia and Herzegovina		--	--	--	--	--	--	--	--	--	--	--	--	18.9712	15.1807	5.01314	8.85347	4.51521	9.49134	11.7928	11.6744	15.1267	14.7823	15.9115	16.1298	17.143	18.3795	19.0831	18.639	21.0372	21.4421	21.933	22.1952
Bulgaria		88.5561	86.4401	89.3793	89.4597	90.3562	92.5215	96.9139	96.1626	92.3196	85.449	76.1884	56.7992	57.5924	52.0483	51.024	52.0781	53.589	54.0812	49.8622	44.7145	49.0257	52.3695	47.964	51.659	51.1202	52.2525	52.9046	51.8992	50.614	42.5232	45.583	52.4445
Croatia		--	--	--	--	--	--	--	--	--	--	--	--	16.5824	16.9427	17.78	18.3466	17.437	18.7054	19.8646	20.0978	20.1027	20.241	21.0924	22.3886	21.6687	20.9792	22.8097	21.9137	22.3197	20.0394	19.5871	22.351
Cyprus		2.82934	2.43902	2.60235	2.8764	2.97848	3.20664	3.56584	4.0126	4.01428	4.88049	5.08823	5.13054	6.03664	6.14875	6.90061	6.77356	6.73148	6.76187	7.26588	7.89936	7.53154	8.19411	8.10356	8.10904	8.59759	8.83332	9.35872	9.32367	9.80452	9.22543	8.86668	9.50276
Czech Republic		--	--	--	--	--	--	--	--	--	--	--	--	--	116.792	110.234	111.01	116.541	99.3845	94.7524	85.6142	94.5953	95.5734	92.5414	93.3943	90.2912	93.9127	96.8324	103.545	99.1006	92.0982	94.6867	92.3966
Denmark		64.967	60.3097	55.4376	51.4815	54.4838	63.3683	64.8436	64.2767	59.172	59.1286	57.1072	64.1523	61.2842	59.1792	64.717	69.2123	72.4759	74.682	60.053	57.5838	54.4976	56.0449	53.1393	61.6947	56.3117	51.8677	59.3129	56.8755	54.2152	49.3073	45.8771	46.6648
Faroe Islands		NA	NA	NA	NA	NA	NA	NA	NA	NA	NA	NA	NA	0.61305	0.61308	0.62103	0.65124	0.66927	0.67059	0.66112	0.66112	0.67384	0.67386	0.67388	0.68019	0.68859	0.6929	0.78669	0.71094	0.6997	0.72467	0.73198	0.78526
Finland		55.3403	52.0923	46.8673	44.2211	42.7949	46.8026	50.3477	50.922	49.2232	51.6987	53.2298	51.2531	49.4881	52.4029	58.0056	49.8473	53.051	53.8643	50.1631	47.966	50.1222	53.0997	53.5608	66.6549	61.4636	51.924	57.9193	58.1547	54.8537	51.6095	54.6497	54.056
Former Czechoslovakia		208.621	207.268	206.445	208.44	213.884	210.995	207.411	211.685	205.073	202.002	196.38	172.626	160.315	--	--	--	--	--	--	--	--	--	--	--	--	--	--	--	--	--	--	--
Former Serbia and Montenegro		--	--	--	--	--	--	--	--	--	--	--	--	45.6123	39.0731	37.8764	30.812	49.9954	51.1463	53.6294	40.5332	46.0272	47.5781	52.7565	56.4938	57.3205	54.4126	--	--	--	--	--	--
Former Yugoslavia		105.933	115.238	118.286	123.663	143.612	150.216	148.089	150.058	152.256	152.773	149.977	133.95	--	--	--	--	--	--	--	--	--	--	--	--	--	--	--	--	--	--	--	--
France		488.917	443.729	423.312	408.542	394.765	396.759	362.824	355.406	340.333	365.197	367.682	392.792	382.07	368.567	361.248	372.539	390.461	384.13	409.443	403.268	401.651	405.635	401.727	408.383	410.914	413.962	416.368	423.056	428.546	386.15	388.663	374.327
Germany		--	--	--	--	--	--	--	--	--	--	--	928.95	895.052	892.936	875.339	890.82	890.296	887.695	869.903	838.885	854.657	877.984	855.33	871.928	867.466	847.359	850.62	826.717	823.311	772.422	793.306	748.486
Germany, East		296.79	296.971	299.96	295.365	310.832	326.085	318.765	319.908	318.862	309.728	292.494	--	--	--	--	--	--	--	--	--	--	--	--	--	--	--	--	--	--	--	--	--
Germany, West		759.254	720.634	696.598	696.993	711.002	688.147	718.592	704.642	698.279	676.912	698.14	--	--	--	--	--	--	--	--	--	--	--	--	--	--	--	--	--	--	--	--	--
Gibraltar		0.48881	0.54815	0.48793	0.38556	0.35719	0.82151	1.43557	1.45472	1.88087	1.60987	1.67143	1.72386	3.09453	3.21345	3.22938	3.23555	3.24857	3.23729	3.71855	3.24512	7.29595	3.96678	4.02884	4.14161	4.28478	4.37765	4.4832	4.622	4.55158	4.86385	4.94606	4.90493
Greece		51.971	52.5697	51.1388	54.4654	55.8546	60.6215	63.6911	69.7201	74.7968	78.1132	81.498	81.4172	79.5857	83.2955	84.7283	85.8423	86.7257	91.1718	96.9865	95.6449	101.288	103.121	102.394	106.184	105.16	105.329	105.724	109.467	106.041	99.8267	92.8787	91.2983
Hungary		83.7478	82.8648	82.3372	80.9102	81.6116	82.4679	77.2775	76.9137	72.3919	71.3341	66.7501	66.1186	62.7012	58.9576	58.9005	57.5799	59.3627	58.6985	58.0891	58.2526	55.3525	57.3757	57.4542	59.5995	58.0499	59.4987	58.5122	56.6275	56.0523	50.9471	51.3171	49.5628
Iceland		1.64828	1.55597	1.55599	1.61849	1.69056	1.84498	1.96153	2.03546	2.12357	2.2628	2.36039	2.21819	2.3186	2.45367	2.54733	2.48268	2.78915	2.82543	3.01479	2.97834	3.17456	3.03775	3.16903	3.18793	3.31729	3.31724	3.40521	3.87777	3.69561	3.36309	3.26917	3.80874
Ireland		21.4385	20.6326	20.1711	19.6788	19.1057	20.016	23.6893	24.4287	23.5164	24.3077	25.7343	26.8175	27.582	28.1505	29.351	30.3295	31.7334	34.4013	36.5963	38.5505	40.6822	43.3046	42.3721	41.4123	43.5498	44.5391	46.0722	45.1305	45.4857	39.315	38.2415	36.5683
Italy		371.789	365.74	355.306	346.335	350.666	365.739	371.487	391.834	397.039	412.498	415.409	416.443	415.1	412.2	403.736	431.435	423.492	423.989	440.847	440.583	447.723	444.807	451.827	472.224	468.925	471.885	467.486	459.529	449.749	407.63	416.818	400.939
Luxembourg		11.6418	10.0587	9.41381	8.84093	9.75479	9.78212	9.71638	9.19459	9.66507	10.3858	10.7202	11.3611	11.2467	11.9071	10.9775	8.89619	9.02487	8.63597	8.00945	8.50593	9.02216	9.58001	10.4089	10.9829	12.2979	12.622	12.4523	12.1445	11.9611	11.4367	12.1552	11.8687
Macedonia		--	--	--	--	--	--	--	--	--	--	--	--	9.33058	9.80188	8.98013	9.30846	9.89799	9.82266	10.849	9.94145	8.41702	8.30939	8.11957	8.21171	8.15741	8.00414	7.93511	8.08239	8.67102	8.01202	7.64031	6.94678
Malta		1.25892	1.37629	1.49646	1.10541	1.58421	1.37463	1.61858	1.80822	2.07029	2.26054	2.37184	2.3899	2.37096	2.77017	2.75047	2.51461	2.61209	2.78787	2.89917	3.30577	2.91414	2.4707	2.93537	2.92473	2.98241	3.08428	2.94229	3.10463	3.17696	6.68233	8.00422	6.83
Montenegro		--	--	--	--	--	--	--	--	--	--	--	--	--	--	--	--	--	--	--	--	--	--	--	--	--	--	1.7717	1.61647	2.15759	1.54964	2.03002	2.1662
Netherlands		201.097	193.274	181.655	174.049	183.91	191.193	195.328	200.682	203.847	203.157	211.115	218.605	212.444	222.156	222.128	222.615	228.074	238.482	237.924	235.524	246.267	261.483	254.191	257.608	264.549	268.477	269.925	258.104	249.497	243.759	254.871	252.996
Norway		33.5695	31.1567	28.6965	29.4398	30.6936	33.9208	36.4686	34.4873	34.022	36.0097	34.784	32.36	35.6717	34.1503	36.0913	37.8644	39.8424	41.7527	41.9908	44.0774	41.258	41.5198	42.4091	45.4612	48.1196	42.0588	41.0438	42.1595	40.0286	44.717	45.1032	45.8691
Poland		428.946	386.608	390.169	391.104	408.791	422.043	427.777	440.864	429.852	412.782	333.789	329.408	327.778	338.644	321.854	308.159	344.428	336.558	313.852	326.433	292.564	276.418	275.572	284.789	292.186	287.589	299.146	295.949	294.7	286.47	304.723	307.911
Portugal		23.5631	21.0906	27.4337	28.0403	27.0623	29.2079	31.398	32.5832	34.0226	43.0071	43.9149	44.3472	47.5951	45.8406	46.5125	50.8254	48.4211	52.4475	56.19	63.4415	63.5405	61.109	65.9868	61.8616	63.387	66.0675	61.4742	59.6139	55.7353	58.4066	54.2101	54.174
Romania		170.899	173.616	179.432	186.258	180.879	182.736	187.833	192.57	190.549	196.841	176.1	135.66	129.832	123.156	116.936	123.636	126.541	120.321	100.548	91.1757	93.2775	102.003	99.991	99.6993	100.301	97.1374	99.2983	98.7297	93.9216	78.4657	76.3409	86.19
Serbia		--	--	--	--	--	--	--	--	--	--	--	--	--	--	--	--	--	--	--	--	--	--	--	--	--	--	57.5907	55.0497	56.0188	54.8248	55.3581	58.4981
Slovakia		--	--	--	--	--	--	--	--	--	--	--	--	--	42.8662	40.1921	42.5718	43.8597	41.4787	38.7084	37.2521	36.3991	39.6221	39.1068	39.3635	38.232	39.6046	39.6814	37.7267	37.4184	34.4498	35.5728	34.8826
Slovenia		--	--	--	--	--	--	--	--	--	--	--	--	12.4198	13.5695	13.0738	15.2884	16.9897	16.6308	16.2282	16.3766	15.6782	16.0714	16.5266	16.7966	16.8105	17.083	17.0794	16.9258	17.42	16.1138	15.9888	15.83
Spain		194.996	205.231	220.938	225.593	210.62	205.044	199.237	201.321	202.165	221.593	224.136	237.004	241.812	230.62	236.88	243.378	237.381	265.344	275.022	298.668	315.644	320.283	337.758	346.373	366.85	379.378	372.274	387.952	360.103	327.801	312.402	318.644
Sweden		82.2966	72.8451	63.2476	59.3816	57.2692	61.8533	65.6865	64.0428	61.5113	58.1178	57.0777	56.4763	58.9854	60.5746	64.7571	64.1695	67.3565	65.7428	66.1796	64.7561	60.6544	60.239	57.1044	60.7572	60.3703	57.6096	56.732	56.5168	54.6093	49.8271	59.1891	53.1459
Switzerland		47.2186	39.8484	36.9813	39.8218	39.6732	41.0664	44.2058	42.6589	42.5775	42.0465	43.4814	45.1262	45.7794	43.5329	42.8333	44.1222	44.9741	43.9781	45.808	46.1554	45.4395	45.9114	44.3278	45.0749	45.4654	45.7494	45.5434	43.8783	45.344	44.0728	42.0156	43.364
Turkey		68.5941	63.1198	73.2671	78.4903	82.0041	93.1076	105.698	109.704	103.461	119.959	129.476	137.292	138.056	144.576	139.949	153.19	169.11	182.282	184.134	181.607	201.926	184.18	194.533	206.027	210.472	230.898	250.957	280.191	272.9	269.063	269.366	296.335
United Kingdom		613.568	599.325	571.939	577.647	564.156	589.261	595.243	606.731	599.404	612.114	601.825	609.98	577.034	582.619	572.245	560.133	588.854	566.802	561.807	556.893	560.339	572.698	561.675	572.576	583.418	583.064	585.499	569.895	563.872	516.191	528.893	496.799
Armenia		--	--	--	--	--	--	--	--	--	--	--	--	11.1352	6.67025	6.08004	7.34256	8.25689	7.59938	8.02264	7.99061	8.61153	8.77753	8.39635	9.02351	9.18418	10.3609	10.3543	11.4385	11.1762	10.1083	10.5838	11.7402
Azerbaijan		--	--	--	--	--	--	--	--	--	--	--	--	60.1437	50.4417	46.1214	45.2659	38.9187	38.4572	47.8193	48.8714	43.7615	31.2245	34.1875	33.9023	35.9277	37.1927	39.8921	33.8099	38.4983	30.7519	29.5006	36.5194
Belarus		--	--	--	--	--	--	--	--	--	--	--	--	91.5836	81.2758	66.0952	62.3437	60.5962	58.8419	56.7518	58.1641	60.052	54.4982	50.9615	55.6693	54.8227	64.3304	66.4248	66.1556	66.941	61.1429	64.3553	67.1578
Estonia		--	--	--	--	--	--	--	--	--	--	--	--	25.8427	16.7532	16.6034	14.7749	19.6273	18.2854	18.5725	16.043	16.2771	16.6518	16.5094	18.6305	19.2701	18.9479	18.6817	19.9965	18.8622	16.1384	19.348	20.2629
Former U.S.S.R.		3081.87	3110.54	3224.42	3287.42	3421.94	3535.69	3667.95	3718.86	3808.25	3739.09	3820.85	3521.39	--	--	--	--	--	--	--	--	--	--	--	--	--	--	--	--	--	--	--	--
Georgia		--	--	--	--	--	--	--	--	--	--	--	--	15.4898	7.73623	4.98844	5.41631	5.68274	5.93072	5.95581	4.82433	4.63094	4.04556	4.54154	3.72334	4.15085	4.86343	4.89927	5.69266	5.75952	6.50681	6.37872	5.86761
Kazakhstan		--	--	--	--	--	--	--	--	--	--	--	--	260.969	225.758	167.028	139.121	141.384	119.18	115.461	132.292	132.711	139.98	143.773	138.035	164.684	169.389	180.095	181.983	184.919	169.79	178.708	195.355
Kyrgyzstan		--	--	--	--	--	--	--	--	--	--	--	--	14.0258	10.4199	8.42717	5.54278	7.07216	7.23318	7.73853	7.44973	7.20941	6.51852	5.77841	5.21465	5.86723	5.51814	5.43654	5.12468	5.15228	7.88337	7.47725	7.79292
Latvia		--	--	--	--	--	--	--	--	--	--	--	--	12.7518	9.20904	8.76452	9.31306	9.92124	8.50758	8.2626	7.47291	7.37642	7.66931	7.44142	7.87107	8.18748	8.61124	9.31882	8.59771	8.05378	7.93639	7.84508	8.47462
Lithuania		--	--	--	--	--	--	--	--	--	--	--	--	23.2501	17.6151	18.4804	17.6355	15.8723	16.3448	17.4267	13.7164	13.2722	13.0194	13.299	13.5912	13.3938	15.6594	16.5527	17.7792	18.2299	13.5037	14.2617	16.0499
Moldova		--	--	--	--	--	--	--	--	--	--	--	--	20.5563	14.9406	11.0504	8.99385	9.40386	8.88305	8.01589	6.05661	5.88816	5.82117	6.33981	6.94701	6.54757	6.83804	7.24488	6.93383	7.26582	6.56653	6.61911	6.46697
Russia		--	--	--	--	--	--	--	--	--	--	--	--	2020.19	1863.34	1688.83	1603.06	1506.08	1395.61	1384.5	1458.93	1498.77	1442.26	1500.78	1551.98	1599.62	1587.53	1635.93	1580.61	1645.6	1554.55	1642.29	1788.14
Tajikistan		--	--	--	--	--	--	--	--	--	--	--	--	7.95785	5.22399	5.06752	3.5972	4.70694	4.76429	5.12297	5.54224	5.9538	6.17881	6.05787	6.67247	7.10983	7.42302	7.41797	7.22727	6.87224	2.43787	2.65457	2.61769
Turkmenistan		--	--	--	--	--	--	--	--	--	--	--	--	20.4518	19.095	18.243	18.5505	18.1998	19.4233	17.5923	19.0736	23.9437	29.7593	34.1847	44.0138	47.0142	47.9874	48.7723	52.0141	55.9805	50.727	52.0908	51.8531
Ukraine		--	--	--	--	--	--	--	--	--	--	--	--	533.082	494.329	413.15	421.445	364.36	342.223	331.343	325.682	324.867	316.743	324.677	355.283	344.66	351.128	331.336	351.996	350.531	245.756	281.087	304.449
Uzbekistan		--	--	--	--	--	--	--	--	--	--	--	--	95.9492	115.804	97.8919	105.067	103.477	103.184	101.807	103.093	107.727	112.585	115.347	116.017	122.495	117.114	121.15	122.895	127.119	107.149	106.159	115.883
Bahrain		7.75915	8.83596	9.36404	10.7279	9.57391	11.3632	12.2476	14.7374	12.6463	13.0573	14.2894	15.9295	13.5743	16.0269	15.8369	15.8843	15.8638	18.4705	19.4267	20.2549	20.2649	20.7952	21.849	22.4467	23.1413	24.7207	27.2431	28.5927	29.9065	30.2096	30.5941	29.6971
Iran		116.84	108.112	133.67	155.99	151.045	159.944	165.409	174.212	180.719	195.34	202.112	226.776	234.808	237.817	250.922	262.322	262.955	290.714	294.613	317.903	321.456	334.153	365.113	387.74	407.932	451.058	477.367	489.351	512.049	562.585	564.623	624.855
Iraq		51.6693	37.7624	36.7952	42.7437	42.8556	47.588	56.1203	53.2961	59.9905	64.2481	69.1896	42.4589	57.6856	66.4427	76.9244	77.0901	76.9656	69.8281	72.1817	75.4374	73.582	77.6823	79.5963	71.5837	78.4127	94.8673	91.4548	99.4307	104.167	112.592	113.539	139.354
Israel		23.4958	24.8576	26.036	27.252	27.5211	26.5181	28.0496	30.545	32.9403	33.8841	34.9691	36.1376	41.848	46.0429	48.5998	49.0751	49.6043	54.5383	56.4201	57.5826	60.3273	67.128	65.5754	64.6392	66.1462	68.6417	68.6278	69.1615	66.8938	65.589	70.5675	72.0951
Jordan		5.20715	6.16414	7.04057	7.55649	7.83853	8.10476	9.0477	9.97863	9.28156	9.41507	10.1771	9.61797	11.198	11.0712	12.695	13.2168	14.2407	13.7814	14.8747	15.1499	15.6346	15.2961	15.997	17.0783	18.2304	19.2807	20.0584	19.8614	19.2953	19.6252	20.6565	18.5541
Kuwait		31.4117	23.5975	23.1094	25.4981	26.4926	25.6731	29.6187	33.8675	38.4282	43.0777	27.7397	42.481	23.5085	30.7097	37.4524	39.989	49.3175	52.8218	56.7873	56.4929	59.4986	57.4599	56.2294	63.4365	67.8736	76.0541	76.6415	74.5215	78.0987	82.2374	86.4909	82.3693
Lebanon		6.43733	5.97684	5.88534	6.17139	5.89202	6.86421	6.94561	7.22116	6.53587	5.00048	4.70651	8.21401	8.16408	10.2737	11.77	12.6235	13.2088	15.3195	15.2957	15.9977	16.4547	15.9759	16.0224	16.1465	15.7463	15.0368	13.3956	12.5401	14.6526	19.8453	19.1842	19.4548
Oman		3.96	4.15887	5.04018	5.78515	7.72769	7.3719	8.80586	8.93252	8.08884	10.4112	12.4555	14.1912	13.5289	14.7654	15.0849	14.1384	14.603	17.9562	21.8179	20.5596	21.7921	22.2032	22.9865	22.4652	24.357	30.1728	34.9659	37.0401	43.7585	46.0452	52.746	52.6744
Palestinian Territories		--	--	--	--	--	--	--	--	--	--	--	--	--	--	--	--	--	0.40619	0.50171	0.53534	0.62818	1.25086	1.04483	1.17794	2.09551	2.65387	2.89097	2.89378	3.01014	2.04248	2.04248	2.50155
Qatar		13.8634	14.0267	14.1471	12.8299	15.4345	13.8269	14.2808	14.5179	14.8056	15.3572	18.7772	22.3054	25.5863	29.9226	30.0101	30.3117	31.0197	32.6503	33.4036	31.8495	34.6983	27.5598	29.4425	32.4788	38.6413	54.9507	58.3664	59.605	63.5004	68.3869	68.2365	64.4583
Saudi Arabia		176.922	175.217	165.569	166.319	184.013	179.217	190.086	191.153	200.249	198.878	208.024	226.438	235.464	232.928	239.932	235.289	250.08	255.115	258.179	264.045	290.539	301.34	311.625	347.257	388.763	401.927	402.423	392.694	421.636	437.685	468.728	513.527
Syria		16.4302	17.5315	17.7009	20.3374	22.3381	23.4996	24.017	27.6758	28.5118	30.8693	36.9253	33.1502	35.3774	38.6051	41.3978	39.8827	42.2553	44.4327	47.7441	50.8795	50.9942	49.3421	52.4336	52.8474	52.7944	50.6456	51.6733	52.6749	54.4104	61.6284	65.5212	63.142
United Arab Emirates		30.3117	35.1069	35.7164	42.6979	47.5611	59.3078	67.085	71.239	78.2203	81.9382	79.0805	94.5957	102.049	95.7927	94.4095	100.935	103.706	112.074	116.84	118.389	115.722	115.334	123.807	127.141	133.523	139.794	155.326	171.582	195.805	205.749	214.414	245.377
Yemen		6.43422	6.55207	7.70043	7.02996	8.88103	9.90965	9.99164	9.89907	10.2281	10.8479	11.4417	11.7619	12.2338	10.0917	9.90061	10.6723	10.9108	10.8005	11.3989	12.3126	13.1784	13.9666	15.3977	16.6536	16.6513	17.3764	18.9761	18.546	22.8352	22.0908	20.9841	23.7485
Algeria		66.9787	54.691	65.9987	71.5879	74.9446	71.3138	71.7453	77.1826	80.5871	78.8453	83.1191	85.8004	82.0513	82.2675	84.222	88.0385	84.6237	80.8324	84.8557	84.5582	83.63	79.1578	81.6771	81.7044	80.4946	90.1413	94.6475	101.146	106.832	113.823	112.564	117.241
Angola		3.38912	3.38012	3.58703	3.85161	3.41319	4.28732	4.5947	4.65264	4.83821	4.73478	7.16848	7.4825	7.50371	7.67947	7.38942	12.1479	12.1517	12.959	12.372	13.482	13.0328	14.9835	15.6489	18.9068	19.8259	20.0029	20.9285	23.7016	23.0845	24.4716	26.5913	26.9733
Benin		0.42067	0.41632	0.27793	0.42118	0.41568	0.49576	0.50243	0.3752	0.46995	0.50276	0.58746	0.67372	0.76501	0.83841	0.88165	0.96226	1.03512	1.12665	1.21636	1.32429	1.65022	1.65022	1.74761	2.05564	2.40003	2.52598	3.00678	3.29473	3.35844	4.50767	5.05743	4.65475
Botswana		1.24836	1.26764	1.2035	1.14529	1.16626	1.50091	1.63144	1.91439	2.03875	2.32458	2.71296	2.78098	3.19916	3.15295	3.17868	3.47552	3.07202	3.18358	3.70763	3.74752	4.37426	3.86083	3.82039	3.50883	4.07181	4.3633	4.40432	4.15277	4.33554	4.32247	5.05007	3.8427
Burkina Faso		0.41825	0.41825	0.41933	0.42186	0.42093	0.40284	0.49316	0.51828	0.51364	0.47407	0.49889	0.57519	0.58439	0.63436	0.6856	0.68481	0.70708	1.07722	1.06692	1.06692	1.06094	1.07391	1.10354	1.14136	1.16062	1.05018	1.24786	1.38072	1.38475	1.70254	1.72968	1.45436
Burundi		0.0981	0.11161	0.09812	0.11215	0.14058	0.14558	0.15058	0.15684	0.24382	0.26705	0.29166	0.33137	0.31577	0.35068	0.37064	0.36076	0.36709	0.37034	0.37662	0.37662	0.37227	0.39592	0.39961	0.41538	0.38157	0.37063	0.36025	0.33461	0.35525	0.1994	0.19875	0.20473
Cameroon		2.22945	2.29109	2.66908	7.19977	7.0971	6.59122	9.38709	8.01977	3.48107	6.53495	3.42983	3.46956	3.5874	6.78382	7.58082	7.53554	6.78118	6.90238	6.89055	6.93117	6.83297	6.46851	6.18427	6.12142	6.4695	6.69472	7.26221	7.73558	7.53987	8.30876	8.54853	8.12627
Cape Verde		0.29932	0.29851	0.13298	0.13078	0.15847	0.15688	0.05311	0.05748	0.08275	0.09044	0.09635	0.09921	0.10672	0.10654	0.1161	0.11256	0.11762	0.11761	0.1176	0.1176	0.17464	0.13678	0.14473	0.14471	0.29752	0.25455	0.29244	0.34454	0.32451	0.37926	0.37926	0.42996
Central African Republic		0.13937	0.18141	0.19449	0.20911	0.1983	0.1999	0.2067	0.22408	0.23986	0.22726	0.24628	0.25887	0.26784	0.2742	0.29006	0.28904	0.29294	0.29928	0.30557	0.30557	0.32459	0.33107	0.34383	0.34376	0.32462	0.30883	0.32473	0.35731	0.33991	0.34058	0.34058	0.29392
Chad		0.27621	0.26304	0.26311	0.26304	0.12383	0.1533	0.27781	0.23728	0.16067	0.16584	0.33963	0.32211	0.32815	0.16354	0.16987	0.16937	0.17291	0.17608	0.17603	0.17603	0.19042	0.19354	0.19992	0.19989	0.18734	0.20761	0.22546	0.26712	0.26181	0.25406	0.25406	0.28977
Comoros		0.04142	0.04134	0.04134	0.04134	0.04204	0.03554	0.03775	0.05033	0.05347	0.05349	0.07	0.06686	0.06749	0.0675	0.07069	0.08324	0.08346	0.08346	0.08661	0.08661	0.09636	0.09954	0.10306	0.10302	0.10593	0.11231	0.11452	0.1446	0.11966	0.15095	0.13011	0.14835
Congo (Brazzaville)		0.72072	0.87183	0.72836	0.60515	0.61399	0.91379	0.81482	1.0144	0.79309	0.90354	1.14165	0.86288	0.85302	3.14326	3.12274	3.10417	3.08365	3.70514	3.66761	3.16639	3.01443	3.20125	2.98516	3.07015	3.07369	5.28792	5.44405	5.77373	5.96083	6.46333	6.79414	6.85847
Congo (Kinshasa)		3.39842	3.58975	3.68559	3.64691	3.40625	3.32152	3.83648	3.46428	4.23813	3.93918	3.64197	3.84657	4.34571	4.55862	3.57927	3.83158	3.86495	3.71211	3.55055	3.18665	2.69529	1.98965	1.78669	1.82928	2.36779	2.4474	2.43656	2.72779	2.69436	2.59724	3.13556	2.7205
Cote dIvoire (IvoryCoast)		4.01485	4.25006	3.93187	4.24535	4.13548	4.27728	4.80268	5.33713	5.64772	5.62304	4.64676	3.79943	3.8605	4.37784	4.55698	4.53699	5.72935	5.23051	5.40912	7.02689	7.36264	5.86497	5.80376	5.78998	6.34677	6.36742	6.27272	6.17883	6.38742	6.51809	6.61779	6.68025
Djibouti		1.45833	1.17312	1.17717	0.87288	0.72452	0.71858	0.71827	0.73088	0.71491	1.71621	1.73114	1.7497	1.77666	1.79876	1.82126	1.81238	1.81725	1.83501	1.83494	1.83494	1.85101	1.87055	1.87387	1.909	1.93923	1.92162	1.68	1.64784	1.70509	1.15975	1.15975	1.14975
Egypt		40.9155	48.9178	54.6607	63.9969	69.9676	75.6023	81.8376	83.9303	83.3892	86.0918	92.6333	94.23	93.8022	95.364	98.5098	99.2449	108.497	112.06	114.899	117.567	119.983	129.294	133.416	143.227	152.718	158.992	151.213	157.902	180.831	184.829	190.587	201.667
Equatorial Guinea		0.05549	0.05537	0.0694	0.06999	0.06975	0.07977	0.08493	0.08022	0.07866	0.11801	0.12115	0.12745	0.12236	1.06036	1.06035	1.05993	1.55501	1.60094	1.67657	1.84041	2.05361	2.05087	3.93732	4.91274	3.80769	4.89368	4.90002	4.62955	4.68116	5.4084	5.47723	5.23233
Eritrea		--	--	--	--	--	--	--	--	--	--	--	--	--	--	0.98717	1.06934	1.11444	1.13865	1.25008	1.06343	0.64128	0.75431	0.71518	0.80711	0.76279	0.71844	0.74435	0.70135	0.7289	0.51372	0.50859	0.62558
Ethiopia		1.70001	1.70227	1.8908	2.16597	2.11382	2.53316	2.55982	2.88884	2.75104	2.98107	3.0112	2.45871	3.64003	3.32699	2.19316	2.37558	1.7139	1.71383	2.61327	3.25405	3.45795	3.55034	3.88786	4.18523	4.34533	4.57928	5.15636	5.70997	6.42447	6.97507	6.44815	6.70277
Gabon		4.78154	4.98535	4.86144	4.77952	5.24873	5.34463	4.00184	3.87254	4.16908	5.71422	5.71557	5.72949	6.05589	5.94625	5.79188	5.48533	5.55558	5.6319	5.5424	5.40068	5.0733	4.95173	4.7086	4.89232	4.92687	4.8398	4.39398	4.43814	4.67176	4.25937	4.53669	4.75798
Gambia, The		0.1523	0.15203	0.15203	0.15203	0.16782	0.16475	0.16057	0.18586	0.1922	0.18913	0.19286	0.20173	0.20381	0.21657	0.23909	0.22271	0.22262	0.22257	0.23518	0.23518	0.26383	0.2829	0.28931	0.29237	0.29636	0.30507	0.32429	0.40246	0.37834	0.44356	0.48132	0.42559
Ghana		2.2309	1.94909	2.22618	1.99234	2.27369	1.90743	2.36141	2.72376	3.13514	3.60284	3.02945	2.9809	3.40868	3.49623	3.86752	3.98569	4.0975	3.82859	3.84263	4.47099	5.31871	5.17609	5.45678	5.94511	6.49114	6.53389	6.68283	6.77291	7.38905	7.48618	9.10806	9.00539
Guinea		0.81493	0.79988	0.81305	0.82029	0.83099	0.73601	1.05885	1.1216	1.14468	1.10994	1.4842	1.15815	1.18233	1.2115	1.24447	1.23419	1.24661	1.24648	1.25252	1.25252	1.30423	1.31375	1.32468	1.33072	1.35067	1.38058	1.37264	1.35532	1.34601	1.43346	1.43346	1.41942
Guinea-Bissau		0.08321	0.08304	0.08409	0.08402	0.11447	0.12428	0.10062	0.18869	0.21122	0.22077	0.28217	0.28863	0.29424	0.31387	0.32037	0.31687	0.32022	0.31763	0.32014	0.32014	0.35548	0.35866	0.37304	0.38244	0.38366	0.39579	0.39057	0.40445	0.46167	0.40794	0.40794	0.45984
Kenya		5.75138	5.78513	5.66614	5.50029	5.38964	5.47669	6.21332	5.49194	6.00906	6.57189	6.66229	5.82862	6.56449	6.69472	7.0923	7.17515	7.48742	6.95087	7.86011	8.09812	8.69947	7.97304	7.93573	8.35901	9.20865	10.1393	11.323	11.2011	11.0406	11.611	12.3055	12.6242
Lesotho		0.14593	0.13646	0.14693	0.14623	0.14593	0.14914	0.1562	0.15618	0.10313	0.15623	0.15621	0.15619	0.16172	0.1617	0.17947	0.17927	0.1797	0.17918	0.18207	0.18207	0.21183	0.21125	0.21128	0.21121	0.21179	0.22677	0.23462	0.23841	0.23982	0.23462	0.55122	0.44561
Liberia		1.88712	1.73545	1.73958	1.74248	1.57103	1.58018	1.28125	0.98596	1.12146	0.9859	0.57794	0.34049	0.3478	0.38297	0.38304	0.38272	0.39875	0.4019	0.4145	0.4145	0.44141	0.46771	0.50293	0.51923	0.52886	0.53687	0.61051	0.68008	0.69074	0.55232	0.53638	0.58796
Libya		32.443	26.669	27.7929	27.4557	26.2432	27.6795	30.1126	30.922	34.8335	37.3809	42.4076	41.6142	36.5561	36.8762	38.1414	39.5793	41.7638	43.6153	41.871	39.6944	41.8906	43.4456	48.3757	46.392	52.3535	56.4356	52.1065	53.6609	56.7816	57.9976	61.6877	49.6693
Madagascar		1.1684	1.01081	0.87836	1.14481	1.13555	1.23678	0.91079	1.26796	1.39321	0.98505	0.95829	0.98387	1.07174	1.10375	1.23935	1.2777	1.28421	1.29735	1.29884	1.2894	1.81079	1.98208	2.29941	2.37972	2.62804	2.52389	2.49937	2.5052	2.81384	1.85917	1.88115	1.84277
Malawi		0.57585	0.61328	0.5501	0.43959	0.41997	0.45389	0.47583	0.43826	0.40936	0.49597	0.53465	0.65298	0.66175	0.64255	0.70812	0.73239	0.74344	0.74338	0.73936	0.83702	0.88301	0.85623	0.91631	0.90983	1.03888	1.09358	1.14856	1.15888	1.19386	0.96045	0.96517	0.95687
Mali		0.41802	0.55944	0.4185	0.41573	0.41694	0.45851	0.364	0.42697	0.21064	0.47046	0.46804	0.48386	0.49754	0.51364	0.52333	0.52257	0.53518	0.54462	0.55077	0.55077	0.56677	0.56675	0.6209	0.62721	0.64956	0.71954	0.6528	0.67137	0.70006	0.6975	0.6975	0.74231
Mauritania		0.60773	0.58278	0.58522	0.58089	0.87283	0.86309	0.51504	0.71453	0.88694	1.06556	0.95594	1.00825	3.31346	3.42516	3.39751	3.12711	3.46849	3.16576	3.17902	3.17666	3.24359	3.17648	3.05756	3.15102	2.63305	3.162	2.83296	2.71455	2.75747	1.89251	1.89251	1.77353
Mauritius		0.85421	0.76796	0.73824	0.84474	0.87099	0.88927	1.23453	1.00429	1.43291	1.70507	1.92155	1.89591	2.13355	2.29512	2.23792	2.43058	2.41479	2.41376	2.57258	2.67405	3.4897	4.05258	3.60123	3.71196	3.94853	4.09567	4.43513	4.92132	4.8657	4.33484	4.62239	5.05954
Morocco		16.4316	16.0878	16.7621	17.3912	16.6199	17.4232	19.9184	19.5549	20.2172	21.7605	22.6345	23.4403	23.731	26.4798	28.9794	27.9612	28.7869	28.4143	28.801	31.009	31.1985	33.752	33.6921	34.4429	33.2023	34.596	35.671	36.1086	37.2347	41.8264	43.2926	43.7109
Mozambique		2.62131	2.3375	2.48022	2.32675	2.04765	2.16563	1.25227	1.17905	1.6795	1.32928	1.18784	1.19196	1.19066	1.18116	1.12998	1.22438	1.07144	1.10635	1.25697	1.29781	1.27945	1.499	1.67709	1.8158	2.13182	2.35589	2.77375	2.50956	2.37787	2.53643	2.55343	3.426
Namibia		--	--	--	--	--	--	--	--	--	--	2.37572	1.26582	1.14651	1.52402	1.49443	1.31882	1.37939	1.44408	1.55128	1.71964	1.80901	2.17325	2.21985	2.43584	2.56774	2.62162	2.9183	3.10524	3.9338	3.60343	3.33619	3.21683
Niger		0.61027	0.63499	0.67615	0.75362	0.80566	0.80953	0.68813	0.77528	1.01877	1.06937	1.09294	1.10112	1.12326	1.14137	1.16075	1.15953	1.14961	1.13024	1.13008	1.13244	1.12491	1.14989	1.2312	1.26111	1.36555	1.26104	1.2189	1.25876	1.29303	1.28835	1.29147	1.27217
Nigeria		69.1385	58.8159	56.1868	55.5649	58.7558	61.0036	59.8968	60.679	63.7677	76.6481	82.4804	88.6308	94.0899	96.6467	95.3483	100.155	101.744	92.0284	88.7536	84.8187	80.7524	91.5144	90.9353	92.7703	92.2649	105.997	101.552	99.1294	99.1026	68.0308	73.6929	75.9634
Reunion		0.60027	0.59653	0.64333	0.74879	0.82813	0.8052	0.79275	0.88331	1.06843	1.1652	1.22641	1.4325	1.40149	1.85178	1.88543	1.86455	1.87069	1.87973	2.41205	2.41205	2.51009	2.60828	2.58938	2.58572	2.6371	2.71849	2.73934	2.7864	2.82325	2.9352	2.9352	3.00508
Rwanda		0.15247	0.35137	0.33703	0.38862	0.63398	0.66768	0.64149	0.65359	0.62214	0.67854	0.70279	0.71223	0.7374	0.68329	0.69629	0.70562	0.70546	0.70113	0.72776	0.72776	0.76623	0.77279	0.77635	0.78574	0.76347	0.81206	0.83188	0.74268	0.72452	0.7649	0.76073	0.86513
Saint Helena		NA	0.00277	0.00277	0.00277	0.00278	0.00287	0.00315	0.00632	0.00632	0.00632	0.00631	0.00315	0.00318	0.00637	0.00637	0.00636	0.00636	0.00636	0.00635	0.00635	0.02224	0.0127	0.01271	0.0127	0.00953	0.0127	0.01176	0.01275	0.01355	0.00957	0.00957	0.0091
Sao Tome and Principe		0.0321	0.03206	0.03208	0.03206	0.0321	0.03313	0.03463	0.03463	0.03464	0.03466	0.06927	0.07304	0.07692	0.07694	0.08013	0.07942	0.08006	0.07939	0.07937	0.07937	0.09211	0.09209	0.09527	0.09525	0.09531	0.09843	0.10789	0.13358	0.13523	0.13347	0.13479	0.15161
Senegal		2.48792	2.40879	2.45888	2.34991	2.79618	2.7545	2.87666	2.93718	2.51864	2.61076	2.56006	2.35655	2.91642	2.93041	3.57551	3.8558	3.93618	3.57828	3.78534	4.17953	4.42907	4.40996	4.458	4.4974	5.30289	5.70733	5.89957	6.03805	6.08381	5.88974	5.95148	7.08837
Seychelles		0.21036	0.1695	0.15495	0.27069	0.28355	0.28928	0.31645	0.33654	0.46304	0.49148	0.45298	0.48784	0.50524	0.5179	0.52412	0.52715	0.52709	0.56523	0.5652	0.5652	0.58764	0.60351	0.88326	0.86951	0.89833	0.88168	1.19843	0.9805	1.0274	1.1718	0.98154	1.0878
Sierra Leone		0.711	0.7102	0.77839	0.71461	0.71249	0.79932	0.90774	0.97529	1.02718	1.05596	1.06574	1.11448	0.81047	0.82166	0.68036	0.84445	0.8443	0.86428	0.86747	0.86747	0.91835	0.93792	0.95384	0.97499	1.15819	1.15811	1.14527	1.24547	1.26054	1.39873	1.39873	1.49234
Somalia		1.11837	1.29339	1.26882	1.24	1.2862	1.26685	1.44135	1.06887	1.07331	1.10171	1.00807	0.59862	0.56541	0.58329	0.58334	0.58282	0.58426	0.5826	0.58246	0.58246	0.72425	0.72227	0.72381	0.72359	0.72577	0.73378	0.76306	0.86172	0.86754	0.81363	0.81363	0.75344
South Africa		235.026	254.697	272.937	276.584	296.467	302.046	308.729	315.235	319.553	297.99	297.977	310.373	320.193	318.989	347.174	347.466	352.277	383.796	365.332	376.646	386.014	392.723	379.977	412.734	442.197	432.413	444.387	457.022	489.97	477.558	473.155	461.565
Sudan and South Sudan		3.16308	3.24075	3.54237	3.39839	3.12029	3.50139	4.31726	4.17691	4.51931	4.28728	3.89406	5.61305	5.17325	4.91927	4.32964	4.00098	3.96702	4.10287	4.13334	4.45968	6.51119	7.46601	8.65922	9.80423	10.7586	11.4124	12.3902	11.9768	12.1019	18.1293	18.5716	18.4648
Swaziland		0.72976	0.68465	0.68465	0.5305	0.58837	0.72741	0.71143	0.73318	0.74175	0.76361	0.75853	0.7067	0.6478	0.58016	0.94113	0.91316	0.82293	0.99101	0.99101	1.00916	0.97204	0.97946	0.93121	0.88268	0.8731	0.74616	0.92006	1.04933	1.03299	0.98085	0.99037	1.02436
Tanzania		1.91743	2.21505	2.17542	1.91949	2.10146	2.12646	2.68616	2.40134	2.53627	2.52062	2.80644	2.3289	2.57691	2.77277	2.53026	2.46402	2.49849	2.45293	2.51299	2.69788	2.72488	3.08156	3.50328	3.67251	4.20058	5.04783	5.44338	5.84354	6.19648	6.74444	6.43978	7.2284
Togo		0.58233	0.53935	0.52161	0.56708	0.66808	0.6269	0.54184	0.49441	0.52136	0.59179	0.58396	1.0266	0.72358	0.5436	0.62698	0.62423	0.63104	0.6558	0.65557	1.00383	1.40118	1.00469	1.29214	2.15172	2.26541	2.27052	2.33147	2.55256	2.74497	1.32946	1.41194	1.44472
Tunisia		8.47987	9.33265	8.74043	10.018	10.6974	10.8277	11.9313	10.8978	11.8451	13.0622	13.0531	12.9699	12.81	15.1143	16.0707	14.3975	15.3828	17.3274	18.5161	19.0929	19.6653	21.4264	21.1665	20.8105	21.1162	22.2889	21.2789	18.8741	19.0148	18.7923	19.1636	20.5162
Uganda		0.70227	0.4453	0.52984	0.51581	0.53077	0.57029	0.67142	0.56313	0.85369	0.79082	0.844	0.93523	0.966	1.00155	1.02737	1.02614	1.02021	1.05092	1.2209	1.2209	1.2643	1.39438	1.46217	1.59229	1.6085	1.68655	1.91606	2.03914	1.96576	3.27832	3.39006	3.24425
Western Sahara		0.15699	0.15726	0.17523	0.16945	0.17583	0.17993	0.19689	0.20332	0.20658	0.20661	0.21616	0.21616	0.22157	0.21526	0.21526	0.23119	0.23115	0.23114	0.23112	0.23112	0.26633	0.26951	0.26952	0.2695	0.26956	0.30484	0.2695	0.28345	0.3146	0.2695	0.2695	0.31665
Zambia		3.63004	3.22424	3.39277	3.02931	3.00691	2.86444	3.07807	2.97288	3.26952	2.97548	2.72549	2.44088	2.97517	2.4331	1.9501	1.9251	2.19419	2.37691	2.2222	1.95828	1.8966	2.05702	2.1319	2.23244	2.23603	2.44161	2.30993	2.2494	2.2498	1.95342	2.19568	2.43373
Zimbabwe		8.87762	8.7091	8.17476	9.78631	9.25142	9.64826	12.4717	14.6969	14.9504	14.2041	15.1418	16.2694	16.5352	15.7362	15.2241	14.7607	14.8033	14.0254	14.0264	15.4203	13.7198	13.1471	12.5297	11.2303	9.84978	10.7397	10.0308	10.0304	8.13583	8.43746	9.13347	8.87463
Afghanistan		1.36105	1.5647	1.69949	2.10583	2.12793	2.17438	2.39826	3.945	6.542	6.41877	6.31929	2.97959	1.77021	1.71907	1.68365	1.4524	1.47146	1.42586	1.39268	1.41284	1.33551	0.84677	0.84782	0.67863	0.72232	0.76961	0.76614	1.31364	1.59156	6.40949	6.62528	6.58917
American Samoa		0.40232	0.46106	0.63732	0.40022	0.46088	0.43178	0.48232	0.49173	0.48545	0.55557	0.5775	0.57743	0.59897	0.59574	0.57979	0.56739	0.57689	0.57684	0.57677	0.57677	0.56412	0.5641	0.57366	0.5736	0.57365	0.60847	0.60258	0.65556	0.66442	0.60258	0.2846	0.42623
Australia		198.835	204.617	207.956	218.259	235.423	237.703	234.549	250.928	246.231	261.51	267.601	268.321	274.868	283.286	281.622	289.065	302.313	331.295	337.449	355.338	356.311	370.058	374.59	376.079	387.855	412.614	419.27	423.791	425.236	424.332	423.708	392.286
Bangladesh		7.63726	8.31733	8.92728	8.10222	9.33892	9.83248	11.1855	12.2632	13.3525	14.5561	14.9256	14.8109	16.5034	17.5521	19.3861	22.5557	22.754	23.7578	24.1489	26.9444	29.3591	32.5211	34.2272	36.8877	39.1239	41.4297	45.1343	46.8625	51.029	55.4647	56.9701	58.8061
Bhutan		0.00546	0.02601	0.03232	0.02976	0.02618	0.03336	0.03184	0.07866	0.08066	0.07786	0.12495	0.12468	0.13141	0.12927	0.20384	0.23952	0.26061	0.27022	0.27176	0.28914	0.2924	0.27495	0.30248	0.25724	0.21923	0.24904	0.23691	0.28865	0.28389	0.33163	0.33542	0.33568
Brunei		5.2355	5.57339	5.83571	4.86471	4.43341	4.99913	3.4608	5.1812	4.62921	5.25099	4.55982	2.28201	3.14001	2.94441	2.90415	3.5242	3.47518	3.66655	3.2683	3.66981	3.79427	4.22193	4.85702	5.18045	5.78367	6.78741	10.1853	10.4931	10.7423	7.34798	8.44944	8.6563
Burma (Myanmar)		4.01276	4.11705	4.54403	5.24231	5.71341	5.98213	4.89911	4.8198	4.57254	4.77443	4.66035	4.58636	4.61426	4.84124	5.82328	6.15464	6.26013	6.89863	8.09322	8.94566	10.0648	9.93131	10.8858	12.6678	12.7354	16.2699	15.0223	16.0239	14.84	11.9041	11.907	13.6666
Cambodia		0.04096	0.04094	0.04094	0.35767	0.39884	0.41298	0.44841	0.45159	0.46875	0.46759	0.46759	0.4803	0.49939	0.49809	0.51105	1.40743	1.54692	1.86091	2.1155	2.13373	2.15153	2.53814	2.74804	3.01006	3.35192	3.56517	3.85899	4.20535	4.17976	4.08155	4.10147	4.39003
China		1448.46	1439.86	1506.94	1593.39	1724.49	1765.57	1878.66	2010.7	2148.32	2183.14	2177.7	2295.67	2375.62	2498.77	2681.8	2722.72	2841.26	3129.78	3197.56	3115.97	3271.81	3353.64	3776.83	4235.7	4744.99	5463.7	5936.04	6326.36	6684.65	7573.38	7997.04	8715.31
Cook Islands		0.02812	0.05604	0.05513	0.05551	0.05542	0.05539	0.05374	0.05373	0.05373	0.04739	0.04738	0.03862	0.04785	0.04783	0.0478	0.04763	0.04775	0.04775	0.04774	0.04774	0.05729	0.05729	0.05729	0.05728	0.06365	0.07001	0.07469	0.07011	0.09059	0.0731	0.0731	0.0754
Fiji		1.30563	0.88466	1.02168	1.0185	0.75558	0.77663	1.00369	0.77909	0.81477	0.96284	1.05055	0.85755	0.89486	0.95484	1.0047	1.073	1.11361	1.10811	1.06847	1.1833	1.43383	1.52552	1.7632	2.28772	2.63907	2.52662	2.26991	2.49023	2.34417	1.35972	1.33105	1.44473
French Polynesia		0.2109	0.31112	0.41742	0.55477	0.83887	0.72763	0.95866	0.9893	0.98322	0.97503	0.92082	0.91178	0.87443	0.85464	0.69197	0.71374	0.71356	0.71344	0.71329	0.71329	0.67652	0.67654	0.69475	0.86066	0.85777	0.92131	1.02381	1.00913	0.99214	1.06349	1.09638	1.21982
Guam		3.54373	5.00254	3.84191	3.6691	1.26899	0.63093	1.0999	0.76542	0.79699	0.74157	1.83566	2.07664	2.51385	3.35148	4.76173	3.60727	3.21466	3.66089	3.05061	3.42186	2.87128	3.05507	2.09615	2.43267	1.96239	2.06358	2.25959	2.0496	1.77352	1.07054	0.90672	1.10259
Hawaiian Trade Zone		6.34246	7.33791	6.7551	6.4471	7.65868	7.37628	4.54342	--	--	--	--	--	--	--	--	--	--	--	--	--	--	--	--	--	--	--	--	--	--	--	--	--
Hong Kong		18.1702	18.8263	21.3756	24.9487	26.6224	28.3302	32.1374	36.1105	39.8855	41.4071	40.055	42.5538	45.1319	48.2191	45.23	47.3796	48.4148	45.9227	51.6558	61.7197	55.7156	60.2516	66.0142	70.0035	78.0693	80.4669	80.0978	84.1242	78.8833	89.5581	91.8727	92.9087
India		291.225	337.776	349.744	367.401	421.913	447.383	473.739	486.585	522.278	553.477	578.619	620.848	659.37	690.764	733.906	870.234	814.416	856.069	893.431	951.137	990.968	1016.28	1007.49	1022.32	1120.88	1181.4	1280.65	1366.21	1471.77	1597.75	1601.24	1725.76
Indonesia		85.7983	91.9272	92.4425	94.2175	98.0448	101.355	110.193	117.169	125.39	140.158	155.979	169.998	180.427	200.021	210.051	214.824	238.502	246.544	240.439	264.923	266.206	275.322	285.812	289.246	313.947	330.795	355.52	371.96	370.191	405.701	414.549	426.79
Japan		947.014	945.006	899.792	867.134	935.736	926.247	877.525	890.404	959.767	989.369	1046.98	1066.42	1073.47	1064.34	1118.43	1116.24	1134.95	1157.75	1113.11	1156.38	1201.43	1193.69	1199.95	1249.72	1256.26	1241.26	1239.89	1254.44	1216.25	1104.91	1179.8	1180.62
Kiribati		0.02235	0.02651	0.02656	0.02673	0.0195	0.01952	0.01891	0.02206	0.02206	0.02206	0.02206	0.02612	0.02228	0.02228	0.02228	0.02227	0.02226	0.02226	0.02226	0.02226	0.02544	0.02544	0.03171	0.0317	0.03176	0.03807	0.03805	0.04138	0.04369	0.06237	0.06235	0.05934
Korea, North		110.513	114.446	120.274	125.737	129.525	135.437	134.877	129.081	161.196	129.049	124.175	121.114	105.766	97.688	90.5267	83.0837	71.6028	66.3501	59.7795	65.7525	69.4039	71.1066	68.3872	69.9792	71.6017	74.6616	75.7157	62.9385	69.5839	66.628	64.669	65.9603
Korea, South		131.736	137.904	138.948	148.49	163.617	172.324	180.299	185.69	207.807	219.507	242.132	269.674	293.461	330.641	351.424	381.434	396.903	426.26	380.752	423.581	438.654	450.448	467.995	477.847	485.91	493.801	484.21	503.1	521.77	524.439	581.1	610.954
Laos		0.41487	0.16498	0.15157	0.16376	0.15196	0.17156	0.20633	0.20546	0.20268	0.22543	0.22454	0.24439	0.26764	0.2672	0.28784	0.36005	0.44609	0.57127	0.70308	0.8435	0.84534	0.75619	0.94555	0.91574	1.15631	1.18612	1.25688	1.33051	1.41818	1.45311	1.42521	1.40443
Macau		0.46886	0.44022	0.46877	0.66071	0.72803	0.58663	0.90356	1.00144	0.99416	1.06228	1.09044	1.08449	1.13148	1.25071	1.32871	1.28617	1.47644	1.50235	1.6242	1.73246	1.57788	1.66013	1.83729	1.90244	2.32451	1.98224	2.303	2.30199	2.39395	1.79714	1.51678	1.80545
Malaysia		26.3303	27.4915	28.9749	35.76	41.8085	44.5249	49.0314	46.1422	47.1251	52.5748	64.9805	67.1076	72.8522	77.2578	86.265	89.4955	101.741	102.19	102.786	106.479	117.574	125.415	137.638	144.656	145.258	147.605	150.243	166.642	170.848	175.441	190.675	191.444
Maldives		0.01406	0.01388	0.01384	0.01392	0.05624	0.06245	0.08191	0.08191	0.08823	0.08822	0.09766	0.09766	0.10183	0.12404	0.24252	0.3439	0.35618	0.31473	0.34014	0.34014	0.48319	0.51815	0.95001	1.06798	0.75014	0.602	0.8265	0.93243	0.88832	1.0618	1.0616	1.07077
Mongolia		7.103	6.34679	7.52144	7.79701	7.93336	8.85744	9.76007	10.2706	10.6198	10.0727	9.58423	11.462	9.88226	8.93249	8.31437	8.7711	6.55362	5.47584	5.48264	5.45854	5.61684	5.73584	6.1257	5.83156	6.19244	6.2513	7.13271	7.37908	7.42255	7.81318	7.99235	10.2117
Nauru		0.12621	0.12746	0.12746	0.12746	0.13214	0.13081	0.14873	0.14872	0.14873	0.14875	0.15527	0.15527	0.16014	0.16014	0.16014	0.16336	0.16333	0.16332	0.1633	0.1633	0.1632	0.1632	0.1697	0.16968	0.17298	0.17615	0.17298	0.17647	0.18592	0.18149	0.18149	0.16876
Nepal		0.47668	0.38104	0.5283	0.53048	0.67698	0.54549	0.69296	0.81899	0.81054	0.80937	0.62942	0.92897	1.11115	1.03867	1.31244	1.39614	1.66627	1.92465	2.79675	3.17968	3.0982	3.24799	2.65605	2.79557	2.79026	3.22247	2.79354	2.91636	2.95019	3.27722	3.54378	3.17291
New Caledonia		1.72019	1.63137	1.15292	1.06488	1.2307	1.28252	1.3765	1.48673	1.44121	1.62802	1.5631	1.70196	1.77129	1.77103	1.72185	1.72117	1.82265	1.67301	1.699	1.67776	1.99916	2.01096	2.29278	2.3799	2.54683	2.48388	2.96291	2.88422	3.18474	2.95339	2.95339	3.02639
New Zealand		20.0402	19.5784	20.6934	21.3898	22.7843	23.074	25.0395	25.0743	27.6253	27.5196	28.7605	28.8905	29.9364	30.0176	31.5667	30.7224	30.6547	33.6831	32.7834	35.6506	35.8399	38.2002	37.4881	39.5954	40.0618	40.387	40.7681	39.5356	40.7308	37.4184	37.026	37.1693
Niue		0.00281	0.00281	0.00281	0.00281	0.00281	0.00287	0.00315	0.00315	0.00315	0.00315	0.00315	0.00315	0.00318	0.00318	0.00318	0.00318	0.00318	0.00318	0.00318	0.00318	0.00318	0.00318	0.00318	0.00318	0.00318	0.00413	0.00477	0.00509	0.00544	0.00345	0.00345	0.00305
Pakistan		33.6744	36.3611	42.4157	41.5704	42.4769	46.6073	50.7873	56.0324	58.2176	62.0864	66.9837	68.0882	70.168	77.7935	84.9598	87.6905	95.2235	95.7947	97.3739	105.598	108.149	103.149	102.61	104.555	109.058	115.509	129.926	140.109	138.772	141.019	141.886	139.664
Papua New Guinea		1.71931	1.71524	1.71524	1.71524	1.95084	2.05479	2.2878	2.53661	2.37511	2.43005	2.46492	2.4424	2.57499	2.60486	2.4916	2.61735	2.67548	2.67795	2.5808	2.57844	2.59959	2.5996	3.68903	4.2685	4.31183	4.23604	4.30007	4.32091	4.54869	3.23463	3.28344	3.27862
Philippines		33.8638	32.1463	31.8994	30.9747	28.5454	27.0972	28.7224	33.7724	35.6586	40.0363	41.3911	41.7003	46.0904	50.6554	53.1634	57.8252	60.2942	65.7442	66.8772	69.3581	70.8783	71.7136	72.2576	73.972	76.0527	76.3012	75.2014	73.8189	74.4146	69.3504	78.2751	81.1505
Samoa		0.0929	0.09943	0.10769	0.10769	0.14027	0.11087	0.11644	0.11644	0.11647	0.12283	0.12911	0.12911	0.13362	0.13364	0.12733	0.1367	0.13665	0.13662	0.13657	0.13657	0.14295	0.14295	0.14933	0.14927	0.15563	0.16515	0.16197	0.16587	0.1769	0.16833	0.16833	0.14656
Singapore		29.4139	30.8908	32.6862	32.4865	34.443	33.4414	41.3447	46.0285	49.0065	53.3528	57.7327	61.1756	68.1115	75.8499	81.8852	82.9683	98.4923	100.252	104.541	104.891	107.644	111.96	110.259	112.661	126.398	133.52	139.768	148.35	155.24	192.378	228.617	212.392
Solomon Islands		0.09768	0.13931	0.12583	0.13951	0.1407	0.1223	0.13219	0.15093	0.16222	0.17085	0.17389	0.17382	0.17238	0.16918	0.16602	0.17163	0.1716	0.17159	0.17155	0.17155	0.17792	0.17792	0.18429	0.18429	0.19066	0.20968	0.19378	0.2133	0.22975	0.19378	0.21235	0.20324
Sri Lanka		4.87856	4.88493	5.06724	5.17624	5.72551	4.80865	5.22008	5.9564	5.22732	4.79884	5.26068	5.28202	5.63375	6.3461	6.67675	7.12989	8.02786	8.94379	8.99076	9.79014	11.3287	11.0801	11.3489	11.7236	11.8458	12.8864	12.7437	13.0565	12.4421	12.8969	11.8392	13.0981
Taiwan		70.6371	63.9748	63.3095	70.8808	81.5391	81.5939	88.5442	91.664	106.217	117.263	118.311	124.343	131.659	150.581	162.107	182.429	197.213	209.22	223.61	225.185	256.127	247.839	273.021	289.014	285.208	288.818	297.078	293.617	290.383	259.557	286.899	293.255
Thailand		33.5632	34.3973	33.1427	35.5503	39.4448	44.5542	45.5055	51.5101	58.9868	69.9638	83.9285	92.9225	100.775	114.612	127.988	145.127	170.235	176.777	162.701	171.443	161.752	172.038	187.049	205.672	225.461	241.777	237.22	246.846	255.085	267.885	273.092	269.623
Timor-Leste (East Timor)		--	--	--	--	--	--	--	--	--	--	--	--	--	--	--	--	--	--	--	--	--	--	--	0.28758	0.3027	0.30512	0.3083	0.3374	0.352	0.19068	0.19068	0.21113
Tonga		0.02911	0.04286	0.04005	0.04286	0.04298	0.04468	0.04728	0.06937	0.08109	0.08744	0.08743	0.09762	0.10033	0.10348	0.11612	0.11599	0.12864	0.13178	0.12855	0.12855	0.13175	0.12545	0.11443	0.11438	0.12391	0.14617	0.18113	0.18639	0.20155	0.18586	0.18586	0.1546
U.S. Pacific Islands		0.14736	0.14706	0.14693	0.14692	0.13915	0.12584	0.13229	0.13229	0.17952	0.27963	0.28905	0.28905	0.2951	0.28876	0.28877	0.29737	0.30364	0.2979	0.29716	0.29716	0.29719	0.29719	0.29723	0.29718	0.29721	0.29715	0.30074	0.30918	0.29446	0.30074	0.35276	0.29275
Vanuatu		0.11663	0.10217	0.10263	0.09951	0.10275	0.11115	0.12459	0.11919	0.14032	0.12401	0.13054	0.09619	0.06518	0.06519	0.06521	0.06516	0.06515	0.06514	0.06513	0.06513	0.08424	0.08421	0.09057	0.09055	0.09395	0.10009	0.09691	0.11152	0.11722	0.12478	0.12478	0.14896
Vietnam		13.3986	13.0085	14.1742	14.3339	14.8361	16.8041	14.9553	16.9835	14.8871	16.6525	16.8442	17.4104	17.3918	21.5976	22.9354	29.9725	35.9628	37.9369	40.2638	42.9263	46.1129	49.1453	56.2074	60.2334	68.8667	73.7718	84.4528	90.2424	103.444	104.675	121.35	112.661
Wake Island		1.23566	1.23297	1.23316	1.23305	1.24368	1.22093	1.28026	1.28001	1.26948	1.26947	1.23719	1.23719	1.26676	1.26629	1.27318	1.28507	1.29113	1.29733	1.29733	1.29733	1.30693	1.3068	1.32903	1.32903	1.32907	1.31956	1.27036	1.37166	1.34309	1.27036	1.28562	1.27486
