# Supplementary material
Source: MDPI journal article supplement (https://www.mdpi.com/1099-4300/15/12/5565)
Supplement: s2 [file s2 › Sources/Raw Data/Total_Coal_Consumption_(Thousand_Short_Tons).xls]

## Sheet: Data3
Table: Total Coal Consumption (Thousand Short Tons)
		1980	1981	1982	1983	1984	1985	1986	1987	1988	1989	1990	1991	1992	1993	1994	1995	1996	1997	1998	1999	2000	2001	2002	2003	2004	2005	2006	2007	2008	2009	2010	2011
North America		749074	780497	758847	792370	852429	879000	861930	901396	952524	964217	966992	963372	974368	1.00887e+06	1.01973e+06	1.03272e+06	1.07969e+06	1.10663e+06	1.11744e+06	1.11892e+06	1.16891e+06	1.14478e+06	1.15251e+06	1.18281e+06	1.19027e+06	1.21305e+06	1.19774e+06	1.2122e+06	1.20011e+06	1.06981e+06	1.12493e+06	1.07182e+06
Bermuda		0	0	0	0	0	0	0	0	0	0	0	0	0	0	0	0	0	0	0	0	0	0	0	0	0	0	0	0	0	0	0	0
Canada		41321.2	42807.2	46094.3	49178.5	54498.3	53685.9	49777.1	55780.3	60763.8	60336.1	53849	55937.3	58421.4	55048.3	57251.8	58457.8	59333	62955.8	65680.1	65292.5	69616.5	68336.7	68618.9	68554.9	66222.5	66434.1	64905.2	63615.5	62484.5	54423.3	53841.3	47122.7
Greenland		2.20462	2.20462	1.10231	1.10231	1.10231	0	0	0	0	0	0	0	0	0	0	0	0	0	0	0	0	0	0	0	0	0	0	0	0	0	0	0
Mexico		5021.03	5060.71	5841.15	6517.97	6633.71	7265.33	7922.31	8675.19	8118.52	8881.32	8645.43	8207.81	8291.59	9738.84	11187.6	12161.1	14039	14125	14657.4	14976	15195.4	16295.5	17541.1	19396.3	16797	20638.6	20543.8	20582.4	17075	17910.5	19784.4	21629.1
Saint Pierre and Miquelon		0	0	0	0	0	0	0	0	0	0	0	0	0	0	0	0	0	0	0	0	0	0	0	0	0	0	0	0	0	0	0	0
United States		702730	732627	706911	736672	791296	818049	804231	836941	883642	895000	904498	899227	907655	944081	951286	962104	1.00632e+06	1.02954e+06	1.0371e+06	1.03865e+06	1.08409e+06	1.06015e+06	1.06635e+06	1.09486e+06	1.10725e+06	1.12598e+06	1.11229e+06	1.128e+06	1.12055e+06	997478	1.05131e+06	1.00307e+06
Central & South America		19422.2	19599.3	19965.4	22023.2	24473.5	28320.3	28455.6	28886	30935	31469.1	26507.7	31084.1	30543.2	31200.4	32822.9	32925.6	35276.9	37173.2	37373.9	36736.9	36711.6	34022.2	33606.2	36015.8	38724.7	39360	40689.4	41460.9	44791.4	39342.5	46970.7	49567.8
Antarctica		0	0	0	0	0	0	0	0	0	0	0	0	0	0	0	0	0	0	0	0	0	0	0	0	0	0	0	0	0	0	0	0
Antigua and Barbuda		0	0	0	0	0	0	0	0	0	0	0	0	0	0	0	0	0	0	0	0	0	0	0	0	0	0	0	0	0	0	0	0
Argentina		1693.15	1453.95	1362.46	1213.64	977.75	1186.09	1373.48	1804.48	1829.84	1810	1166.25	1471.83	1413.16	1355.84	2141.79	1849.68	1641.34	1518.99	1489.22	1085.85	1131.81	867.288	1071.99	790.016	960.234	829.644	1147.84	1688.74	1923.79	1956.11	1514.71	2267.28
Aruba		--	--	--	--	--	--	0	0	0	0	0	0	0	0	0	0	0	0	0	0	0	0	0	0	0	0	0	0	0	0	0	0
Bahamas, The		0	31.967	17.637	0	0	0	0	0	0	0	0	0	0	0	0	0	0	0	0	0	0	0	0	0	0	0	0	0	0	0	0	0
Barbados		0	0	0	0	0	0	0	0	0	0	0	0	0	0	0	0	0	0	0	0	0	0	0	0	0	0	0	0	0	0	0	0
Belize		0	0	0	0	0	0	0	0	0	0	0	0	0	0	0	0	0	0	0	0	0	0	0	0	0	0	0	0	0	0	0	0
Bolivia		1.10231	1.10231	1.10231	1.10231	0	0	0	0	0	0	0	0	0	0	0	0	0	0	0	0	0	0	0	0	0	0	0	0	0	0	0	0
Brazil		10575.6	10928.3	11940.2	12873.9	15416.9	18643.4	18798.8	19315.8	19204.5	19307	16969	19582.6	18756.9	18982.9	19680.7	20772	21344.1	21771.8	21163.3	22818.9	24145	23725	22091.4	22354.9	24183.9	23757.6	23616.5	24658	24610.2	19470.6	25823.2	27570
Cayman Islands		0	0	0	0	0	0	0	0	0	0	0	0	0	0	0	0	0	0	0	0	0	0	0	0	0	0	0	0	0	0	0	0
Chile		1961.01	1864.01	1250.02	1811.1	2102.11	2145.1	1945.58	2026.05	2836.25	3808.49	4144.22	3296.84	2935.3	2968.22	3536.38	3890.69	5336.93	6881.27	6084.91	6780.79	5095.31	3970.59	4024.54	3982.65	5696.45	5689.03	6678.9	6254.51	9045.3	7977.45	9482.08	8953.49
Colombia		4399.32	4563.57	4706.87	5202.91	5123.54	5101.5	5202.91	4315.55	5564.47	5173.15	3041.53	5511.15	6179.01	6352.98	6069.12	5046.51	5273.13	5563.7	5675.36	4382.24	4043.55	3581.41	3587.58	4104.45	3217.15	4568.89	4176.66	3288.42	3927.54	5049.39	4968.12	5532.06
Costa Rica		1.10231	1.10231	1.10231	1.10231	1.10231	1.10231	1.10231	1.10231	1.10231	2.20462	2.20462	0.02205	0	0	0	0.27558	13.0403	0.35274	0.50706	0.46297	0.49604	0.70857	31.4048	84.9551	67.3071	33.0693	67.1749	137.789	133.997	116.382	103.904	107.872
Cuba		174.165	175.268	169.756	174.165	184.086	151.017	189.598	202.825	198.416	253.532	239.202	125.663	73.9651	92.7044	118.498	108.467	42.6594	33.7307	37.9195	40.1241	41.7776	28.3294	45.9664	26.2901	32.1875	45.4263	40.7855	44.5775	39.4076	30.4679	26.4996	26.8854
Dominica		0	0	0	0	0	0	0	0	0	0	0	0	0	0	0	0	0	0	0	0	0	0	0	0	0	0	0	0	0	0	0	0
Dominican Republic		0	0	0	7.71618	14.33	246.918	30.8647	255.736	106.924	11.0231	18.8286	214.069	203.266	237.438	67.5717	87.9644	114.751	116.514	164.928	257.5	102.118	223.317	257.302	1165.36	856.628	524.193	892.795	919.317	957.512	940.007	897.954	1089.05
Ecuador		0	0	0	0	0	0	0	0	0	0	0	0.73083	0	0	0	0	0	0	0	0	0	0	0	0	0	0	0	0	0	0	0	0
El Salvador		1.10231	1.10231	1.10231	0	0	0	0	0	0	0	0	0.61509	0	1.10231	1.10231	1.10231	1.10231	1.10231	1.10231	1.10231	0.66139	1.10231	1.10231	1.10231	1.10231	1.10231	1.10231	0	0	0	0	0
Falkland Islands (Islas Malvinas)		0	0	0	0	0	0	0	0	0	0	0	0	0	0	0	0	0	0	0	0	0	0	0	0	0	0	0	0	0	0	0	0
French Guiana		0	0	0	0	0	0	0	0	0	0	0	0	0	0	0	0	0	0	0	0	0	0	0	0	0	0	0	0	0	0	0	0
Grenada		0	0	0	0	0	0	0	0	0	0	0	0	0	0	0	0	0	0	0	0	0	0	0	0	0	0	0	0	0	0	0	0
Guadeloupe		0	0	0	0	0	0	0	0	0	0	0	0	0	0	0	0	0	0	0	0	0	0	0	0	0	0	0	0	0	0	0	0
Guatemala		24.2508	23.1485	4.40925	3.30693	0	0	0	0	0	0	0	0	0	0	0	0	0	0	0	16.5347	237.328	220.462	429.736	403.821	469.155	451.132	472.296	493.174	497.672	324.278	541.665	517.017
Guyana		0	0	0	0	0	0	0	0	0	0	0	0	0	0	0	0	0	0	0	0	0	0	0	0	0	0	0	0	0	0	0	0
Haiti		0	0	40.7855	62.8317	66.1387	67.241	19.8416	19.8416	34.1716	13.2277	13.2277	27.5578	28.6601	0	0	0	0	0	0	0	0	0	0	0	0	0	0	0	0	0	0	0
Honduras		0	1.10231	0	0	0	0	1.10231	1.10231	1.10231	1.10231	1.10231	0.5732	1.10341	1.10231	1.10231	1.10231	1.10231	1.10231	1.10231	61.5641	148.625	135.706	155.007	185.938	191.516	201.723	144.612	141.779	192.882	189.322	196.895	259.517
Jamaica		1.10231	1.10231	0	0	0	0	0	0	0	41.8878	57.3202	15.849	70.6626	69.4456	58.4225	61.7294	94.7988	66.1387	63.9341	79.3664	58.4225	58.643	97.0034	93.6965	102.515	66.5796	35.274	39.6832	52.5692	56.6037	59.5248	61.7956
Martinique		0	0	0	0	0	0	0	0	0	0	0	0	0	0	0	0	0	0	0	0	0	0	0	0	0	0	0	0	0	0	0	0
Montserrat		0	0	0	0	0	0	0	0	0	0	0	0	0	0	0	0	0	0	0	0	0	0	0	0	0	0	0	0	0	0	0	0
Netherlands Antilles		0	0	0	0	0	0	0	0	0	0	0	0	0	0	0	0	0	0	0	0	0	0	0	0	0	0	0	0	0	0	0	0
Nicaragua		0	0	0	0	0	0	0	0	0	0	0	0	0	0	0	0	0	0	0	0	0	0	40.3005	40.7855	77.5256	70.3605	108.126	72.3006	66.5906	74.7257	75.4753	75.4753
Panama		2.20462	3.30693	3.30693	3.30693	9.9208	38.5809	8.81849	38.5809	28.6601	12.1254	35.274	49.7297	54.0133	58.4225	59.5248	56.2179	110.231	62.8317	62.8317	66.1387	66.1387	69.4456	49.604	0	1.96211	1.96211	252.176	246.411	34.5023	69.0267	118.543	87.4464
Paraguay		0	0	0	0	0	0	0	0	0	0	0	0	0	0	0	0	0	0	0	0	0	0	0	0	0	0.33069	0.22046	0.36376	0.31967	0.18739	0.18739	1.23459
Peru		253.036	263.645	286.959	249.233	232.615	310.549	290.459	324.024	382.282	333.201	256.807	438.466	425.878	605.119	551.491	580.837	606.976	633.957	691.525	631.536	980.91	893.344	1208.62	1193.7	1219.41	1594.6	1224.84	1608.72	1440.11	1073.75	1175.27	1141.94
Puerto Rico		0	0	0	188.495	110.231	110.231	255.736	322.977	394.627	328.489	234.792	211.644	169.756	176.37	178.574	181.881	187.393	190.7	192.904	176.37	176.37	170.858	485.017	1521.19	1433	1466.07	1653.47	1653.47	1653.47	1653.47	1653.47	1653.47
Saint Kitts and Nevis		0	0	0	0	0	0	0	0	0	0	0	0	0	0	0	0	0	0	0	0	0	0	0	0	0	0	0	0	0	0	0	0
Saint Lucia		0	0	0	0	0	0	0	0	0	0	0	0	0	0	0	0	0	0	0	0	0	0	0	0	0	0	0	0	0	0	0	0
Saint Vincent/Grenadines		0	0	0	0	0	0	0	0	0	0	0	0	0	0	0	0	0	0	0	0	0	0	0	0	0	0	0	0	0	0	0	0
Suriname		1.10231	1.10231	1.10231	1.10231	1.10231	0	0	0	0	0	0	0	0	0	0	0	0	0	0	0	0	0	0	0	0	0	0	0	0	0	0	0
Trinidad and Tobago		0	0	0	0	0	0	0	0	0	0	0	0	0	0	0	0	0	0	0	0	0	0	0	0	0	0	0	0	0	0	0	0
Turks and Caicos Islands		0	0	0	0	0	0	0	0	0	0	0	0	0	0	0	0	0	0	0	0	0	0	0	0	0	0	0	0	0	0	0	0
Uruguay		5.51156	4.40925	3.30693	2.20462	2.20462	1.10231	1.10231	1.10231	1.10231	1.10231	1.10231	0.55116	0.44092	2.28652	4.53601	3.64468	1.26766	1.27868	1.27868	1.94007	0.79366	1.59835	2.55736	1.92904	2.35895	3.04238	3.50535	4.29901	2.60145	3.00931	4.73994	2.84396
Venezuela		328.489	281.089	175.268	227.076	231.485	317.466	336.205	256.839	351.637	372.581	246.433	0.68343	5.03756	42.9791	84.0182	7.95869	232.533	52.0181	1463.09	55.3801	198.989	74.3399	27.0948	65.0364	212.294	55.314	173.14	209.34	212.889	357.733	328.489	220.462
Virgin Islands, U.S.		0	0	0	0	0	0	0	0	0	0	80.4687	135.584	225.974	253.532	270.066	275.578	275.578	277.782	279.987	281.089	283.294	0	0	0	0	0	0	0	0	0	0	0
Virgin Islands, British		0	0	0	0	0	0	0	0	0	0	0	0	0	0	0	0	0	0	0	0	0	0	0	0	0	0	0	0	0	0	0	0
Europe		1.41197e+06	1.42516e+06	1.44306e+06	1.46988e+06	1.50673e+06	1.57354e+06	1.58987e+06	1.6047e+06	1.57404e+06	1.58919e+06	1.48245e+06	1.32809e+06	1.24514e+06	1.17543e+06	1.12588e+06	1.11065e+06	1.1137e+06	1.08725e+06	1.05665e+06	992480	1.044e+06	1.04196e+06	1.03139e+06	1.05631e+06	1.05177e+06	1.03786e+06	1.05763e+06	1.08155e+06	1.03417e+06	959646	966325	1.0037e+06
Albania		1715.2	1912.51	2094.39	2267.45	2474.69	2710.58	2685.23	2678.62	2792.15	2462.56	2344.62	1308.44	371.479	244.713	187.558	88.1849	124.561	42.9901	54.0133	131.175	80.4687	93.6965	99.208	99.208	99.208	84.878	84.878	84.878	108.027	238.099	263.452	48.5017
Austria		7823.1	8287.18	7655.55	7842.95	9095.17	9089.66	7497.92	7568.47	7020.62	7058.1	8076.64	8560.55	6186.17	5597.54	5610.76	6796.85	6677.8	6824.41	5799.26	6268.84	6743.94	7103.29	7206.91	7700.75	7187.07	7284.07	6944.56	6168.53	5878.63	4540.42	5425.58	5643.83
Belgium		20031.2	24571.6	24386.4	19876.9	22667.9	22385.7	19535.2	18345.8	15013.5	18145.1	18033.8	17035.7	15458.8	14080.9	15081.8	14416	13932.1	13530.9	13599.2	11901.7	13326.9	12250	10587.7	9881.12	9638.61	8655.35	8201.2	7330.37	7490.21	5176.45	5488.41	4443.42
Bosnia and Herzegovina		--	--	--	--	--	--	--	--	--	--	--	--	16534.7	14330	1543.24	1807.79	1862.91	6010.9	7754.76	7464.85	8197.89	8074.43	8633.3	9273.75	9359.73	9947.26	10835.7	10604.2	12222.4	12362.4	12715.2	13713.9
Bulgaria		40742.5	40439.8	43737	43823.8	45319.3	43649.3	47026.8	48852.2	44872.9	45551.9	41626.6	33121.5	33519.2	32206.3	30765.5	32736.2	33079.3	37642.8	36833.7	31913.7	32261.3	34665.8	31701	35124.3	33834.2	32335.2	33283.2	37165.5	36385.1	33241.3	35992.7	45184.8
Croatia		--	--	--	--	--	--	--	--	--	--	--	--	790.357	847.567	574.084	295.419	429.24	588.011	467.049	308.653	899.78	877.44	1082.47	1256.63	1332.69	1281.99	1203.72	1294.11	1330.49	963.42	1290.81	1814.4
Cyprus		0	0	0	0	57.3202	81.571	60.6271	166.449	100.31	82.6733	119.05	123.835	28.6601	34.1716	29.7624	22.0462	12.1254	20.9439	28.6601	33.0693	54.0133	71.6502	58.4225	58.4225	63.9341	58.4225	60.6271	55.1156	45.1948	24.2508	29.7624	19.8416
Czech Republic		--	--	--	--	--	--	--	--	--	--	--	--	--	78854.9	72771.3	71435.3	71130.4	70029.8	64519.4	56045.9	67044.8	64752	62490	64165.5	60413.3	62148.3	63511.9	64250.4	59851.1	56206.9	56885.9	54510.4
Denmark		10739.8	9236.27	10646.1	9595.62	10262.5	13500	12973.1	13409.6	12505.7	9957.18	11074.9	14948.4	12216.9	13063.5	14343.3	12175	16590.9	12323.8	10411.3	8510.95	7364.54	7748.15	7651.14	10541.4	8126.24	6974.32	10149	8751.25	7573.98	7500.13	7185.97	6113.42
Faroe Islands		0	0	0	0	0	0	0	0	0	0	0	0	0	0	0	0	0	0	0	0	0	0	0	0	0	0	0	0	0	0	0	0
Finland		8014.91	6947.87	4555.85	4735.53	5434.4	7082.35	6232.47	7504.54	7276.36	7193.68	7091.17	6982.26	6077.04	7195.89	8983.84	7508.94	8812.54	8203.4	6219.24	6224.75	6311.83	7263.13	7805.47	10352.9	9468.85	5643.83	8995.96	8402.92	6045.08	6293.1	8184.66	6467.26
Former Czechoslovakia		134052	133673	134755	137836	143268	140288	140849	139466	136983	129968	119482	107882	101375	--	--	--	--	--	--	--	--	--	--	--	--	--	--	--	--	--	--	--
Former Serbia and Montenegro		--	--	--	--	--	--	--	--	--	--	--	--	42808.3	41139.4	37812.6	45486.9	44960	47412.6	49360.4	36790.7	45242.2	45324.8	47477.7	50096.7	50794.5	46305.9	--	--	--	--	--	--
Former Yugoslavia		48673.6	58541.5	62438.1	68159.1	76499.3	81621.7	81864.3	82707.5	84509.8	85305.7	83156.2	81067.3	--	--	--	--	--	--	--	--	--	--	--	--	--	--	--	--	--	--	--	--
France		55984.2	50830.9	51088.8	46040.2	44274.3	42486.4	34973.1	30746.8	24124.1	32538	33829.9	35682.9	31544.8	25013.6	24566.1	25682.8	27926	24091	28914.7	25628.7	24695.1	20684.9	22257.9	23708.5	22469.5	23323.8	21562.3	22426.5	21122.5	18855	20020.2	17191.6
Germany		--	--	--	--	--	--	--	--	--	--	--	407944	362204	334978	314277	300724	295809	281006	268774	257562	269815	278152	278407	277307	280407	270789	270534	281443	267882	247867	255958	256661
Germany, East		296752	303081	309555	312280	332736	346788	349572	350139	348810	340356	321263	--	--	--	--	--	--	--	--	--	--	--	--	--	--	--	--	--	--	--	--	--
Germany, West		238281	240607	235832	235910	240556	227080	224532	214719	212854	212876	212419	--	--	--	--	--	--	--	--	--	--	--	--	--	--	--	--	--	--	--	--	--
Gibraltar		0	0	0	0	0	0	0	0	0	0	0	0	0	0	0	0	0	0	0	0	0	0	0	0	0	0	0	0	0	0	0	0
Greece		25628.7	30168.1	30599.1	36044.5	36249.5	41908.8	43946.9	49019.8	56219	58635.2	58946.1	58544.9	62202.3	62447	65507.1	64434.5	65721.3	66147.5	68238.6	68321.3	72406.4	75494	76814.6	78160.5	78964.1	77892.6	71720.8	73948.6	71822.2	72257.6	64285.7	66193.8
Hungary		31469.9	31378.4	32021	30599.1	30967.2	28958.8	29304.9	29117.6	26978	25347.6	22945.7	22318.5	21025.5	19625.6	18561.8	18408.6	19142.7	18764.6	18051.5	18306.1	16578.8	16868.7	15850.1	16362.7	14981.5	12924.6	13059.1	13019.4	12757	11655.8	11822.3	12423
Iceland		30.8647	50.7063	52.9109	76.0595	105.822	113.538	125.663	101.413	103.617	108.027	104.72	106.924	74.9572	74.9572	112.436	91.4918	106.924	93.6965	110.231	95.9011	163.142	154.324	160.937	152.119	171.961	165.347	147.71	177.472	155.426	142.198	149.914	146.607
Ireland		1177.27	1431.9	1451.74	1715.2	1652.36	1774.72	2554.06	3597.94	3625.5	3645.34	3600.15	3580.31	3284.89	3247.41	3039.12	3020.33	3365.36	3142.69	3266.15	2807.59	3330.08	3408.35	3176.86	3187.88	3269.46	3359.85	3002.7	2773.42	2625.71	2183.68	2179.27	2350.13
Italy		19244.2	20888.8	22741.8	20135.9	24671.9	26875.5	23564.1	24713.8	23366.8	23089	24772.2	23181.6	20369.6	17725.2	18711.7	19966.2	18319.3	18434	19261.8	19210	20480.9	21904	22747.3	24754.6	27794.8	27497.2	27797	27974.5	27203.9	21057.5	23370.1	25265
Luxembourg		2924.43	2366.66	2175.96	2002.9	2304.93	2255.33	2063.53	1675.51	1760.39	1846.37	1822.12	1715.2	1618.19	1670	1450.64	819.017	766.106	487.222	167.551	168.654	190.7	211.644	126.766	97.0034	141.096	135.584	163.142	134.482	136.687	124.561	124.561	109.129
Macedonia		--	--	--	--	--	--	--	--	--	--	--	--	7503.43	7618.07	7975.22	8195.68	8082.15	8314.73	9370.75	8498.82	8660.86	9353.11	8092.07	8305.92	8291.59	8151.59	7464.85	7561.86	8368.75	8159.31	7557.45	6599.54
Malta		1.10231	1.10231	26.4555	57.3202	103.617	233.69	160.937	200.621	270.066	334	330.693	267.862	225.974	330.693	231.485	40.7855	0	0	0	0	0	0	0	0	0	0	0	0	0	0	0	0
Montenegro		--	--	--	--	--	--	--	--	--	--	--	--	--	--	--	--	--	--	--	--	--	--	--	--	--	--	1585.12	1283.09	1903.69	1032.87	2060.22	2060.22
Netherlands		6654.65	7654.45	6193.89	8596.93	10865.5	10868.8	10975.7	11426.6	13665.4	13852.7	14947.3	13614.6	13358.9	13791	15023.4	15631.9	15734.4	15682.6	15807.1	13113.1	14161.4	14751.1	14802.9	15156.8	14925.3	14209.9	13681.9	14858.1	14061.1	13191.4	13247.6	13062.4
Norway		1601.66	1490.32	1498.04	1499.14	1822.12	1857.39	1651.26	1570.79	1611.58	1586.23	1408.75	1280.89	1254.43	1388.91	1612.68	1673.31	1641.34	1682.13	1750.47	1736.14	1757.08	1543.24	1329.39	1289.7	1515.68	1268.76	1165.14	1315.06	1404.34	917.123	1370.17	1363.56
Poland		221123	199837	208032	212671	226960	238407	247267	258261	253080	242054	202177	201677	191767	193421	183862	184592	188790	181896	168152	161762	158488	151770	149949	154155	153519	150166	154819	149579	148915	140908	147871	152988
Portugal		777.57	697.543	579.265	731.053	691.149	1297.42	2478.99	3184.14	3712.36	4528.3	4857.89	5094.29	5196.19	5490.61	5776.11	6253.41	5994.37	6046.18	5495.02	6705.36	6730.71	5685.72	6271.05	5921.62	6086.96	6041.77	6030.75	5231.57	4585.62	5158.82	2981.75	4076.35
Romania		44974.3	48465.3	48614.7	57344.3	57805.1	60348.2	62070.1	67079	76168.6	77724	51971.8	43321.9	48619.6	48853.3	49507	50193.7	50123.2	42065.3	34568.5	30790.9	35648.7	38170.8	38363.7	41821.7	40411.8	40325.9	45193.7	44505.8	44472.8	38683.4	35946.4	41750
Serbia		--	--	--	--	--	--	--	--	--	--	--	--	--	--	--	--	--	--	--	--	--	--	--	--	--	--	47511.8	47647.4	49572	50394.4	49314.1	53053.1
Slovakia		--	--	--	--	--	--	--	--	--	--	--	--	--	15933.9	13710.5	13948.6	13561.7	12383.4	11529.1	10876.5	9896.55	10122.5	9693.73	10227.2	9845.85	9290.28	9555.94	8824	8992.66	8567.16	8415.04	8288.28
Slovenia		--	--	--	--	--	--	--	--	--	--	--	--	6380.18	6357.03	5760.68	5809.18	5635.02	6196.09	5938.15	5497.23	5507.15	5795.95	6232.47	5962.4	5993.27	5788.24	5827.92	5857.68	5772.8	5480.69	5461.95	5544.63
Spain		34073.5	45245.5	50081.3	52697.1	52114	53695.8	51971.8	50333.7	42279.2	53343.1	51630.1	52481	52225.3	48995.5	47526.2	47590.1	40482.4	45212.4	43727.6	47794	49722	45634.6	50532.2	46675.2	49593	48350.7	42539.3	46145	28553.2	21487.4	15929.5	25481
Sweden		2830.74	2451.54	2730.43	3473.38	4182.17	4903.08	5053	4963.71	4932.84	4455.54	4463.26	4175.56	3870.22	3960.6	4326	4178.86	4447.83	3807.38	3636.53	3504.25	3538.42	3966.12	4003.59	3728.02	4117.13	3703.77	3836.04	3831.63	3310.24	2519.88	3401.73	3464.56
Switzerland		491.631	741.856	666.898	579.816	799.176	795.869	693.354	642.648	552.258	572.1	586.43	493.835	346.126	287.703	291.01	311.954	234.792	180.779	149.914	157.631	227.076	243.611	224.872	231.485	221.565	261.248	271.169	318.568	287.703	267.862	271.169	278.885
Turkey		22599.6	23822.1	26490.7	29969.6	35238.7	46190.2	55219.2	53965.2	46012.7	60648.1	59990	63546	65960.1	60476.1	65569.9	67339.1	73280.6	80095	86283.4	83690.8	88845.2	80291.3	73237.6	71061.6	71421	85232.9	92449.8	108917	108837	108914	105733	112496
United Kingdom		133560	130344	122355	123316	87553.3	116295	122973	128542	122836	125929	119377	118034	110744	96144.7	90779.7	78971.5	76928.1	68894.5	68409.4	60659.1	65627.2	69529.4	64327.6	69491.9	67307.1	68261.7	74440.2	69668.3	64501.7	53273.6	55392.2	54890.7
Eurasia		751332	748107	770505	763734	769602	778868	802558	806943	821181	777312	848469	672436	599096	550150	494222	460729	441920	402248	387255	390118	395230	374137	386142	403126	396991	397902	414774	413432	438615	410404	432443	449072
Armenia		--	--	--	--	--	--	--	--	--	--	--	--	155.426	3.30693	39.6832	110.231	110.231	110.231	132.277	154.324	143.3	154.324	132.277	121.254	110.231	88.1849	77.1838	110.231	66.1387	66.1387	55.1156	66.1387
Azerbaijan		--	--	--	--	--	--	--	--	--	--	--	--	29.7624	7.71618	8.81849	12.1254	12.1254	6.61387	1.10231	0	0	0	0	0	0	0	0	0	0	0	0	0
Belarus		--	--	--	--	--	--	--	--	--	--	--	--	2050.3	1772.52	1321.67	1240.1	1230.18	892.872	925.942	662.489	650.364	575.407	458.562	415.571	357.149	271.169	235.895	180.779	168.654	159.835	165.347	144.403
Estonia		--	--	--	--	--	--	--	--	--	--	--	--	23604.9	17286.4	17102.4	14699.3	16571	16533.6	15362.9	14053.4	14658.5	14689.4	14394	17077	17114.5	16339.6	15504	18629.1	17415.4	15253.8	19761.1	20706.9
Former U.S.S.R.		751332	748107	770505	763734	769602	778868	802558	806943	821181	777312	848469	672436	--	--	--	--	--	--	--	--	--	--	--	--	--	--	--	--	--	--	--	--
Georgia		--	--	--	--	--	--	--	--	--	--	--	--	580.918	311.954	403.446	48.5017	27.5578	19.1802	38.5809	30.8647	29.7624	25.3532	25.3532	54.0133	15.4324	19.8416	17.637	52.9109	131.175	249.122	124.561	98.1057
Kazakhstan		--	--	--	--	--	--	--	--	--	--	--	--	100108	91505.1	87641.5	72361.2	64720	54227.1	54344	50989.6	49238	52736.8	54317.5	59202.9	69144.7	71368	76565.4	81095.9	87042.9	80357.4	86714.4	92076.1
Kyrgyzstan		--	--	--	--	--	--	--	--	--	--	--	--	2734.83	2444.93	2237.69	1298.52	1119.95	1356.95	1350.33	1343.72	1288.6	874.133	1369.07	1612.68	1585.12	1477.1	1381.2	1122.15	1100.11	1141.99	1263.25	1553.16
Latvia		--	--	--	--	--	--	--	--	--	--	--	--	554.463	669.103	473.994	286.601	272.271	229.281	173.063	152.119	119.05	152.119	123.459	117.947	112.436	139.994	149.914	182.984	184.086	148.812	187.393	304.238
Lithuania		--	--	--	--	--	--	--	--	--	--	--	--	725.321	731.935	531.314	410.06	379.195	300.931	259.043	210.541	158.733	143.3	246.918	314.159	306.443	336.205	466.278	445.224	375.668	277.342	354.944	406.753
Moldova		--	--	--	--	--	--	--	--	--	--	--	--	2958.6	2575	2534.21	1500.25	1300.73	731.935	621.704	263.452	210.541	165.347	176.37	249.122	207.235	186.291	213.848	144.403	218.258	199.518	205.03	169.756
Russia		--	--	--	--	--	--	--	--	--	--	--	--	325764	312686	284422	270035	278241	253146	238255	247124	252512	230630	240234	243427	235114	233492	240254	230402	249796	243602	248729	256691
Tajikistan		--	--	--	--	--	--	--	--	--	--	--	--	508.166	144.403	88.1849	37.4786	22.0462	44.0924	35.274	26.4555	33.0693	35.274	48.5017	61.7294	111.333	116.845	123.459	209.439	229.281	238.099	240.304	225.974
Turkmenistan		--	--	--	--	--	--	--	--	--	--	--	--	551.156	440.925	440.925	220.462	110.231	60.6271	0	0	0	0	0	0	0	0	0	0	0	0	0	0
Ukraine		--	--	--	--	--	--	--	--	--	--	--	--	132331	114774	92090.4	94668.7	74109.5	71511.3	72537.6	71912.6	72349.1	70000.1	70665.9	77433	69248.3	70633.9	76103.6	76964.5	78009.5	64502.9	70866.5	73401.8
Uzbekistan		--	--	--	--	--	--	--	--	--	--	--	--	6439.7	4797.26	4886.55	3799.67	3693.85	3077.65	3218.75	3194.5	3839.35	3955.09	3949.58	3040.17	3563.77	3433.7	3681.72	3892.26	3877.93	4207.52	3776.52	3227.57
Middle East		1075.86	1254.43	2320.37	3064.43	4388.3	4726.71	5105.91	5189.68	5200.7	5456.44	5565.57	6189.62	7312.73	7747.04	8788.73	9296.89	10871	11850.9	12606	12549.9	14245.9	14703.2	16007.7	16470	16457.1	16305.4	17260.4	17750.5	17158.6	15232.8	16316.4	16811.4
Bahrain		0	0	0	0	0	0	0	0	0	0	0	0	0	0	0	0	0	0	0	0	0	0	0	0	0	0	0	0	0	0	0	0
Iran		1058.22	837.757	1304.03	1197.11	1423.08	1490.32	1556.46	1587.33	1609.37	1629.22	1461.66	1709.68	1793.46	1386.71	2049.2	1849.68	1998.49	2087.78	2130.77	2320.37	2343.51	1814.4	2035.97	2283.99	2203.52	2716.1	2714.99	2871.52	2669.8	1948.89	2367.76	2579.41
Iraq		1.10231	1.10231	1.10231	1.10231	1.10231	1.10231	1.10231	1.10231	1.10231	1.10231	2.20462	1.10231	0	0	0	0	0	0	0	0	0	0	0	0	0	0	0	0	0	0	0	0
Israel		5.51156	399.037	1000.9	1857.39	2958.6	3233.08	3547.24	3600.15	3589.13	3826.12	4101.7	4476.49	5517.07	6235.78	6613.87	7241.08	8641.02	9525.07	10249.3	10003.6	11674.2	12661.7	13743.5	13961.1	14028.7	13364.4	14320.6	14654.1	14263.9	13059.1	13569.5	13909
Jordan		0	0	0	0	0	0	0	0	0	0	0	0	0	0	0	0	0	0	0	0	0	0	0	0	0	0	0	0	0	0	0	0
Kuwait		0	0	0	0	0	0	0	0	0	0	0	0	0	0	0	0	0	0	0	0	0	0	0	0	0	0	0	0	0	0	0	0
Lebanon		6.61387	6.61387	3.30693	0	0	0	0	0	0	0	0	0	0	122.357	123.459	203.928	225.974	225.974	220.462	220.462	220.462	220.462	220.462	220.462	220.462	220.462	220.462	220.462	220.462	220.462	374.786	318.568
Oman		0	0	0	0	0	0	0	0	0	0	0	0.14661	0	0	0	0	0	0	0	0	0	0	0	0	0	0	0	0	0	0	0	0
Palestinian Territories		--	--	--	--	--	--	--	--	--	--	--	--	--	--	--	--	--	7.71618	0	1.10231	3.30693	2.20462	4.40925	0	0	0	0	0	0	0	0	0
Qatar		0	0	0	0	0	0	0	0	0	0	0	0	0	0	0	0	0	0	0	0	0	0	0	0	0	0	0	0	0	0	0	0
Saudi Arabia		0	0	0	0	0	0	0	0	0	0	0	0	0	0	0	0	0	0	0	0	0	0	0	0	0	0	0	0	0	0	0	0
Syria		4.40925	9.9208	11.0231	8.81849	5.51156	2.20462	1.10231	1.10231	1.10231	0	0	2.20462	2.20462	2.20462	2.20462	2.20462	5.51156	4.40925	5.51156	4.40925	4.40925	4.40925	3.30693	4.40925	4.40925	4.40925	4.40925	4.40925	4.40925	4.40925	4.40925	4.40925
United Arab Emirates		0	0	0	0	0	0	0	0	0	0	0	0	0	0	0	0	0	0	0	0	0	0	0	0	0	0	0	0	0	0	0	0
Yemen		0	0	0	0	0	0	0	0	0	0	0	0	0	0	0	0	0	0	0	0	0	0	0	0	0	0	0	0	0	0	0	0
Africa		113242	125307	132648	137095	147423	151607	156341	160973	164306	153103	152283	157203	160920	160018	174173	175452	177268	184060	174147	182704	188936	192584	185265	200123	212891	207930	210546	215899	230678	224394	222543	214972
Algeria		672.41	795.869	821.222	1299.63	1660.08	1264.35	1122.15	1221.36	1223.57	1229.08	1205.93	1183.88	998.694	960.113	842.166	1056.01	652.568	593.044	912.714	946.885	856.496	910.509	1129.87	1212.54	1276.48	1119.95	1073.65	1236.79	1235.69	685.638	552.258	552.258
Angola		0	0	0	0	0	0	0	0	0	0	0	0	0	0	0	0	0	0	0	0	0	0	0	0	0	0	0	0	0	0	0	0
Benin		0	0	0	0	0	0	0	0	0	0	0	0	0	0	0	0	0	0	0	0	0	0	0	0	0	0	0	0	0	0	0	0
Botswana		408.958	443.129	478.403	460.766	462.971	513.736	585.738	688.293	698.725	748.519	901.736	883.914	1003.6	992.08	1004.53	1005.73	857.863	878.451	1125.57	1144.2	1146.4	1051.61	1078.06	935.862	1027.35	1104.52	1079.16	929.248	1007.51	817.915	1092.39	813.506
Burkina Faso		0	0	0	0	0	0	0	0	0	0	0	0	0	0	0	0	0	0	0	0	0	0	0	0	0	0	0	0	0	0	0	0
Burundi		0	0	0	0	0	0	0	0	0	0	0	0	0	0	0	0	0	0	0	0	0	0	0	0	0	0	0	0	0	0	0	0
Cameroon		0	1.10231	1.10231	1.10231	1.10231	2.20462	1.10231	1.10231	1.10231	1.10231	1.10231	1.10231	1.10231	1.10231	1.10231	1.10231	1.10231	1.10231	1.10231	1.10231	1.10231	0	0	0	0	0	0	0	0	0	0	0
Cape Verde		0	0	0	0	0	0	0	0	0	0	0	0	0	0	0	0	0	0	0	0	0	0	0	0	0	0	0	0	0	0	0	0
Central African Republic		0	0	0	0	0	0	0	0	0	0	0	0	0	0	0	0	0	0	0	0	0	0	0	0	0	0	0	0	0	0	0	0
Chad		0	0	0	0	0	0	0	0	0	0	0	0	0	0	0	0	0	0	0	0	0	0	0	0	0	0	0	0	0	0	0	0
Comoros		0	0	0	0	0	0	0	0	0	0	0	0	0	0	0	0	0	0	0	0	0	0	0	0	0	0	0	0	0	0	0	0
Congo (Brazzaville)		0	0	0	0	0	0	0	0	0	0	0	0	0	0	0	0	0	0	0	0	0	0	0	0	0	0	0	0	0	0	0	0
Congo (Kinshasa)		281.089	289.908	273.373	262.35	265.657	268.964	277.782	282.192	315.261	275.578	241.406	251.327	255.736	263.452	267.862	320.773	273.373	273.373	276.68	276.68	256.839	251.327	259.043	274.476	292.113	310.852	326.284	347.228	368.172	378.093	405.651	397.934
Cote dIvoire (IvoryCoast)		0	0	0	0	0	0	0	0	0	0	0	0	0	0	0	0	0	0	0	0	0	0	0	0	0	0	0	0	0	0	0	0
Djibouti		0	0	0	0	0	0	0	0	0	0	0	0	0	0	0	0	0	0	0	0	0	0	0	0	0	0	0	0	0	0	0	0
Egypt		864.212	1367.97	1535.52	1075.86	1076.96	1096.8	1213.64	1394.42	1230.18	1372.38	1606.07	1287.47	1248.42	1632.67	1719.73	1184.98	1639.14	1373.48	1340.41	1208.13	1515.68	1295.22	1420.88	1472.69	1502.45	1468.28	1435.21	1404.34	1373.48	1350.33	1316.16	1316.16
Equatorial Guinea		0	0	0	0	0	0	0	0	0	0	0	0	0	0	0	0	0	0	0	0	0	0	0	0	0	0	0	0	0	0	0	0
Eritrea		--	--	--	--	--	--	--	--	--	--	--	--	--	--	0	0	0	0	0	0	0	0	0	0	0	0	0	0	0	0	0	0
Ethiopia		0	0	0	0	0	0	0	0	0	0	0	0	0	0	0	0	0	0	0	0	0	0	0	0	0	0	0	0	0	0	0	0
Gabon		0	0	0	0	0	0	0	0	0	0	0	0	0	0	0	0	0	0	0	0	0	0	0	0	0	0	0	0	0	0	0	0
Gambia, The		0	0	0	0	0	0	0	0	0	0	0	0	0	0	0	0	0	0	0	0	0	0	0	0	0	0	0	0	0	0	0	0
Ghana		2.20462	2.20462	2.20462	2.20462	2.20462	2.20462	2.20462	3.30693	3.30693	3.30693	3.30693	3.30693	3.30693	3.30693	3.30693	3.30693	3.30693	3.30693	0	0	0	0	0	0	0	0	0	0	0	0	0	0
Guinea		0	0	0	0	0	0	0	0	0	0	0	0	0	0	0	0	0	0	0	0	0	0	0	0	0	0	0	0	0	0	0	0
Guinea-Bissau		0	0	0	0	0	0	0	0	0	0	0	0	0	0	0	0	0	0	0	0	0	0	0	0	0	0	0	0	0	0	0	0
Kenya		19.8416	99.208	36.3763	101.413	131.175	95.9011	94.7988	101.413	125.663	145.505	167.551	146.607	175.268	145.505	136.687	106.924	98.1057	101.413	81.571	79.3664	72.7525	72.7525	109.129	101.413	119.05	98.1057	132.277	121.254	120.152	104.72	110.231	106.924
Lesotho		0	0	0	0	0	0	0	0	0	0	0	0	0	0	0	0	0	0	0	0	0	0	0	0	0	0	0	0	0	0	0	0
Liberia		0	0	0	0	0	0	0	0	0	0	0	0	0	0	0	0	0	0	0	0	0	0	0	0	0	0	0	0	0	0	0	0
Libya		1.10231	1.10231	1.10231	1.10231	1.10231	1.10231	2.20462	2.20462	2.20462	4.40925	5.51156	5.51156	5.51156	4.40925	5.51156	5.51156	5.51156	5.51156	0	0	0	0	0	0	0	0	0	0	0	0	0	0
Madagascar		11.0231	13.2277	13.2277	12.1254	7.71618	4.40925	12.1254	13.2277	13.2277	14.33	14.33	14.33	14.33	15.4324	13.2277	11.0231	11.0231	13.2277	13.2277	8.81849	11.0231	11.0231	11.0231	11.0231	11.0231	18.8098	16.624	11.2469	14.5858	15.9361	16.5347	16.5347
Malawi		71.6502	52.9109	67.241	48.5017	45.1948	36.3763	30.8647	30.8647	17.637	12.1254	19.8416	12.1254	13.2277	16.5347	18.7393	18.7393	18.7393	18.7393	14.2198	60.55	68.5638	51.5661	75.0013	70.6141	67.1308	65.2568	65.1466	67.4615	56.6257	52.9109	55.1156	55.1156
Mali		0	0	0	0	0	0	0	0	0	0	0	0	0	0	0	0	0	0	0	0	0	0	0	0	0	0	0	0	0	0	0	0
Mauritania		6.61387	6.61387	7.71618	7.71618	7.71618	7.71618	5.51156	6.61387	6.61387	6.61387	6.61387	6.61387	6.61387	6.61387	6.61387	4.40925	3.30693	2.20462	1.10231	0	0	0	0	0	0	0	0	0	0	0	0	0
Mauritius		1.10231	2.20462	1.10231	15.4324	26.4555	39.6832	50.7063	41.8878	45.1948	82.6733	82.6733	72.7525	79.3664	69.4456	38.5809	69.4456	45.1948	49.604	78.2641	149.914	279.326	329.04	345.023	348.771	318.348	401.241	534.621	631.624	718.707	656.978	736.344	728.628
Morocco		1459.46	1527.8	1650.16	1868.42	1817.71	1876.13	2526.5	2580.51	2544.13	2544.13	2527.6	2860.5	2565.08	2878.13	3163.63	3615.58	4176.66	3831.63	4369.56	4008	4463.26	5625.09	5762.88	5390.3	5132.36	5443.21	5429.99	5532.5	4918.51	4518.37	4655.06	5357.23
Mozambique		317.466	324.08	267.862	199.518	137.789	116.845	112.436	69.4456	71.6502	70.5479	63.9341	68.3433	66.1387	66.1387	66.1387	61.7294	0	0	0	0	0	0	0	0	0	0	0	9.9208	11.0231	11.0231	11.0231	36.3763
Namibia		--	--	--	--	--	--	--	--	--	--	0	16.5347	13.2277	99.208	110.231	17.637	15.4324	12.1254	18.7393	6.61387	3.30693	4.40925	0	8.81849	1.10231	22.0462	70.5479	84.878	455.255	212.746	149.914	149.914
Niger		22.0462	33.0693	49.604	143.3	165.347	166.449	136.687	180.779	170.858	188.495	189.598	189.598	187.393	189.598	189.598	190.7	190.7	191.802	191.802	192.904	174.386	180.007	201.613	208.227	255.515	206.719	187.282	200.678	198.4	246.629	248.099	248.099
Nigeria		198.416	132.277	67.241	63.9341	83.7757	154.324	123.459	119.05	67.241	60.6271	69.4456	78.0723	104.72	39.6832	35.274	29.7624	16.5347	18.7393	20.9439	23.1485	8.81849	3.30693	47.3994	25.3532	3.30693	8.81849	8.81849	8.81849	12.1254	8.81849	8.81849	8.81849
Reunion		0	0	0	0	0	0	0	0	0	0	0	0	0	0	0	0	0	0	0	0	0	0	0	0	0	0	0	0	0	0	0	0
Rwanda		0	0	0	0	0	0	0	0	0	0	0	0	0	0	0	0	0	0	0	0	0	0	0	0	0	0	0	0	0	0	0	0
Saint Helena		0	0	0	0	0	0	0	0	0	0	0	0	0	0	0	0	0	0	0	0	0	0	0	0	0	0	0	0	0	0	0	0
Sao Tome and Principe		0	0	0	0	0	0	0	0	0	0	0	0	0	0	0	0	0	0	0	0	0	0	0	0	0	0	0	0	0	0	0	0
Senegal		0	0	0	0	0	0	0	0	0	0	0	0	0	0	0	0	0	0	0	0	0	0	0	0	139.994	167.551	184.086	236.997	236.997	279.987	291.01	393.525
Seychelles		0	0	0	0	0	0	0	0	0	0	0	0	0	0	0	0	0	0	0	0	0	0	0	0	0	0	0	0	0	0	0	0
Sierra Leone		0	0	0	0	0	0	0	0	0	0	0	0	0	0	0	0	0	0	0	0	0	0	0	0	0	0	0	0	0	0	0	0
Somalia		0	0	0	0	0	0	0	0	0	0	0	0	0	0	0	0	0	0	0	0	0	0	0	0	0	0	0	0	0	0	0	0
South Africa		104766	116368	123517	127347	137489	141768	144634	148042	151315	140487	139082	143639	147390	146390	160745	162261	163936	171665	160839	169104	175010	177859	170122	185926	198820	193349	196079	201156	216854	211825	209404	201403
Sudan and South Sudan		0	0	0	0	0	0	0	0	0	0	0	0	0	0	0	0	0	0	0	0	0	0	0	0	0	0	0	0	0	0	0	0
Swaziland		194.007	180.779	180.779	112.436	137.789	182.984	189.598	181.881	181.881	181.881	176.37	135.722	110.782	54.84	200.896	188.771	142.612	234.415	234.415	242.99	221.587	225.652	203.087	180.522	175.412	116.752	170.417	177.404	182.212	141.594	146.045	146.045
Tanzania		2.20462	2.20462	2.20462	4.40925	3.30693	4.40925	4.40925	3.30693	3.30693	3.30693	4.40925	4.40925	4.40925	48.5017	50.7063	48.5017	62.8317	30.8647	49.604	82.6733	87.0826	85.9803	87.0826	60.6271	71.6502	82.6733	88.1849	94.7988	101.413	108.027	115.743	109.129
Togo		0	0	0	0	0	0	0	0	0	0	0	0	0	0	0	0	0	0	0	0	0	0	0	0	0	0	0	0	0	0	0	0
Tunisia		99.208	114.64	79.3664	115.743	119.05	113.538	102.515	114.64	138.891	135.584	121.254	124.535	127.868	131.175	121.254	109.129	119.05	119.05	95.9011	136.687	128.97	117.947	100.31	28.6601	0	0	0	0	0	0	0	0
Uganda		0	0	0	0	0	0	0	0	0	0	0	0	0	0	0	0	0	0	0	0	0	0	0	0	0	0	0	0	0	0	0	0
Western Sahara		0	0	0	0	0	0	0	0	0	0	0	0	0	0	0	0	0	0	0	0	0	0	0	0	0	0	0	0	0	0	0	0
Zambia		657.211	560.315	667.558	500.011	560.259	546.261	597.673	504.894	566.203	447.013	344.314	355.484	449.896	353.695	155.058	156.991	252.078	350.425	226.834	137.696	141.096	146.607	151.017	159.835	119.05	154.324	63.9341	15.4324	1.10231	1.10231	1.10231	1.10231
Zimbabwe		3185.68	2988.37	2927.74	3452.44	3220.95	3344.41	4515.07	5390.3	5563.37	5088.27	5447.62	5862.09	6095.78	5657.06	5276.76	4984.65	4746.55	4292.4	4256.03	4893.16	4489.71	4362.95	4161.23	3707.07	3558.26	3791.95	3600.15	3632.12	2812	2978.45	3227.57	3131.67
Asia & Oceania		1.07839e+06	1.11732e+06	1.17745e+06	1.2376e+06	1.3747e+06	1.41801e+06	1.47827e+06	1.56217e+06	1.67168e+06	1.70132e+06	1.7261e+06	1.80248e+06	1.84749e+06	1.91847e+06	2.04355e+06	2.16941e+06	2.24941e+06	2.29518e+06	2.35793e+06	2.33345e+06	2.43381e+06	2.52584e+06	2.63352e+06	2.89161e+06	3.18766e+06	3.57986e+06	3.86314e+06	4.12095e+06	4.35115e+06	4.76825e+06	4.96075e+06	5.33837e+06
Afghanistan		131.175	137.789	159.835	159.835	163.142	166.449	176.37	184.086	152.119	139.994	115.743	103.617	48.0718	52.459	57.3974	62.6664	68.2551	74.0974	78.2641	83.4891	89.0778	28.6601	23.1485	38.5809	37.4786	36.3763	38.5809	267.862	382.502	551.156	551.156	551.156
American Samoa		0	0	0	0	0	0	0	0	0	0	0	0	0	0	0	0	0	0	0	0	0	0	0	0	0	0	0	0	0	0	0	0
Australia		73439.3	77464.9	78820.8	83008.5	89322.5	91623	87284.3	99286.3	92988.8	103668	103721	108077	111209	109060	109751	112244	120434	126833	137691	140662	140919	140991	143245	142749	144656	154785	156857	156529	155547	156551	154550	131174
Bangladesh		259.043	271.169	329.591	176.37	68.3433	108.027	163.142	256.839	222.667	275.578	620.601	198.416	186.291	69.4456	65.0364	707.684	388.014	712.093	205.03	101.413	727.525	771.618	771.618	771.618	771.618	817.915	1042.79	988.773	1385.61	1385.61	1385.61	2037.07
Bhutan		1.15743	1.20152	1.21254	1.32277	0.99208	1.10231	1.433	20.7565	22.0462	19.8416	19.8416	19.8416	20.9439	12.1254	49.604	57.3202	65.0364	78.2641	74.9572	72.7525	72.7525	60.1818	70.0706	45.9862	10.2173	40.6775	35.7369	32.9536	47.0996	23.6655	25.2694	25.2694
Brunei		2.20462	0	0	0	0	0	0	0	0	0	0	0	0	0	0	0	0	0	0	0	0	0	0	0	0	0	0	0	0	0	0	0
Burma (Myanmar)		83.7757	111.333	139.994	124.561	139.994	149.914	125.663	84.878	74.9572	91.4918	91.4918	97.0034	95.9011	78.2641	71.6502	80.4687	65.0364	63.9341	66.1387	211.644	639.341	707.684	541.235	943.579	514.779	632.727	807.994	854.291	737.446	683.433	756.186	1559.77
Cambodia		0	0	0	0	0	0	0	0	0	0	0	0	0	0	0	0	0	0	0	0	0	0	0	0	0	0	0	0	0	34.1716	37.4786	47.3994
China		678511	679907	725981	768224	844846	856097	907164	971986	1.04261e+06	1.0583e+06	1.06901e+06	1.11733e+06	1.15539e+06	1.20547e+06	1.30303e+06	1.40107e+06	1.46916e+06	1.46998e+06	1.50937e+06	1.4375e+06	1.48187e+06	1.52384e+06	1.60837e+06	1.83461e+06	2.03336e+06	2.3848e+06	2.60847e+06	2.78809e+06	2.95322e+06	3.35086e+06	3.50178e+06	3.82687e+06
Cook Islands		0	0	0	0	0	0	0	0	0	0	0	0	0	0	0	0	0	0	0	0	0	0	0	0	0	0	0	0	0	0	0	0
Fiji		23.1485	19.8416	25.3532	19.8416	24.2508	17.637	16.5347	5.51156	8.81849	17.637	26.4555	19.8416	22.0462	22.0462	22.0462	22.0462	24.2508	24.2508	22.0462	19.8416	18.7393	16.5347	17.9677	18.1881	0.22046	0	0	0	0	0	0	0
French Polynesia		0	0	0	0	0	0	0	0	0	0	0	0	0	0	0	0	0	0	0	0	0	0	0	0	0	0	0	0	0	0	0	0
Guam		0	0	0	0	0	0	0	0	0	0	0	0	0	0	0	0	0	0	0	0	0	0	0	0	0	0	0	0	0	0	0	0
Hawaiian Trade Zone		0	0	0	0	0	0	0	--	--	--	--	--	--	--	--	--	--	--	--	--	--	--	--	--	--	--	--	--	--	--	--	--
Hong Kong		30.4988	140.053	1832.11	3936.72	4885.07	6278.8	6889.87	8863.91	10780.4	11612.6	10378.3	9274.81	11547.8	13329.6	9604.18	10328.6	8237.93	7068.76	8601.89	7046.58	6678.34	8854.82	9606.75	11754.6	11785.3	11932.6	12562.6	13515.9	12505.9	13593.5	11381.4	13810.7
India		122929	144013	150295	157906	186706	194065	208830	210934	221892	236379	247864	269814	281854	295960	312526	329291	318616	343008	354650	381413	396194	411844	419532	432048	481400	504908	539486	587255	640524	674878	662585	721419
Indonesia		645.558	792.077	643.529	704.201	1222.45	1757.04	3957.92	4260.2	4876.48	6571.47	7198.98	6489.64	7511.26	11577.6	13801.8	11590.3	16149.9	14865.9	17712.4	21573.3	22437.5	31299	30874.6	30125.1	42717.9	45436.2	54554.5	60170.8	55206	63807.3	63773.1	73720.4
Japan		97571.1	105750	103737	99055.8	111415	117478	107359	109900	122407	122565	126610	128773	125305	126749	136316	140763	142224	148323	140577	153132	168798	173205	179203	185306	203364	196282	198108	207581	203803	181497	206125	192854
Kiribati		0	0	0	0	0	0	0	0	0	0	0	0	0	0	0	0	0	0	0	0	0	0	0	0	0	0	0	0	0	0	0	0
Korea, North		49335	50900.3	53601	55903.7	57387.4	60076	59447.7	56835.2	71308.5	57279.4	53674.8	51901.2	45656.6	41938.5	38684.5	35511	30645.4	30078.8	27136.7	30541.7	32708.9	33756.1	32151.1	32896.3	33645.8	35505.4	36421.5	29712.8	33164.1	31899.8	30805.2	31321.1
Korea, South		30765.5	34183.8	34665.5	37759.7	44235.8	49522.4	53850.1	52386.2	53593.3	50623.6	49773.8	48240.2	43086	45609.2	46850.4	49246.9	53866.6	57054.5	66021.8	61886	70980	80024.5	80566.8	82267.7	86017.8	87911.5	89636.7	98225.9	110522	114150	127414	139481
Laos		0.09921	0.11023	0.22046	0.33069	0.44092	1.10231	2.20462	1.10231	1.10231	1.10231	1.10231	1.10231	1.10231	1.10231	1.10231	25.9275	55.9236	105.21	175.403	238.516	261.787	192.487	298.461	306.226	434.148	437.575	468.158	504.253	516.109	550.544	537.51	537.51
Macau		4.40925	1.10231	1.10231	1.10231	1.10231	0	0	0	0	0	2.31485	2.20462	2.20462	2.20462	2.20462	2.20462	2.20462	1.10231	1.10231	1.02074	1.17396	1.13648	1.05381	1.51127	1.72512	1.34592	1.32608	1.46938	0	0	0	0
Malaysia		88.1849	200.982	151.017	408.362	449.125	587.25	468.479	638.238	676.999	2085.36	2502.25	2546.2	2758.71	1963.33	2622.4	2668.7	3274.97	2583.82	2613.58	2163.84	3677.31	5108.11	6426.48	8432.68	9662.91	11622.8	12342.4	16049.1	16626.8	18698.9	25530.6	26479.7
Maldives		0	0	0	0	0	0	0	0	0	0	0	0	0	0	0	0	0	0	0	0	0	0	0	0	0	0	0	0	0	0	0	0
Mongolia		5513.44	4782.93	5712.67	5926.2	6024.13	6794.65	7519.97	7944.36	8311.43	7911.29	7335.88	7806.57	6982.04	6386.79	5844.45	5751.86	5797.06	5546.83	5595.33	5530.3	5744.14	5719.89	6100.19	5776.11	5824.61	6032.95	6524.58	6682.21	6613.87	7188.17	7177.15	10144.6
Nauru		0	0	0	0	0	0	0	0	0	0	0	0	0	0	0	0	0	0	0	0	0	0	0	0	0	0	0	0	0	0	0	0
Nepal		94.9641	52.922	54.9149	56.3138	120.562	96.4578	63.9341	95.9011	98.1057	89.2872	14.33	76.0595	112.436	66.1387	133.38	136.687	139.994	148.812	368.172	461.868	473.994	542.337	251.327	320.773	283.294	455.255	285.499	361.558	340.614	354.944	371.479	371.479
New Caledonia		132.277	90.3895	71.6502	106.924	113.538	195.109	192.904	170.858	187.393	228.178	180.779	194.007	187.393	187.393	181.881	181.881	185.188	124.561	132.277	122.357	279.987	285.499	304.238	345.023	309.749	286.601	311.954	268.964	404.548	278.885	278.885	278.885
New Zealand		2530.31	2540.71	2488.34	2713.37	2665	2504.46	2400.78	2183.67	2720.58	2300.54	2384.58	2321.63	1990.79	2553.81	2620.41	2215.69	1840.13	2580.55	2564.95	2729.03	2490.82	2920.46	2371	3991.37	4436.14	4733.5	4373.87	3665.64	4431.76	3296.28	2918.37	3248.51
Niue		0	0	0	0	0	0	0	0	0	0	0	0	0	0	0	0	0	0	0	0	0	0	0	0	0	0	0	0	0	0	0	0
Pakistan		2180.85	2238.34	2781.78	2473.18	2771.6	3123.84	3326.26	3378.26	3913.65	3874.84	4024.94	4254.39	4473.39	4594.84	4751.47	4550.16	4745.58	4912.4	4818.2	4545.93	4457.75	4860.09	5390.3	6684.42	8701.65	8503.23	8701.65	11145.5	9250.6	8971.71	8507.64	6900.47
Papua New Guinea		0	0	0	0	0	1.10231	1.10231	1.10231	1.10231	1.10231	1.10231	1.10231	1.10231	1.10231	1.10231	1.10231	1.10231	1.10231	1.10231	0	0	0	0	0	0	0	0	0	0	0	0	0
Philippines		707.684	816.813	946.885	1382.3	2257.72	2738.76	2176.51	2323.23	2934.01	2392.03	2730.43	3031.54	2996.08	3154.82	3387.4	3820.61	5127.95	5908.39	5282.28	6923.62	9551.53	9958.28	9283.67	9809.47	10514.9	11028.6	11229.2	11542.3	13161.6	11275.5	15086.2	16484
Samoa		0	0	0	0	0	0	0	0	0	0	0	0	0	0	0	0	0	0	0	0	0	0	0	0	0	0	0	0	0	0	0	0
Singapore		5.51156	9.9208	3.30693	6.61387	9.9208	20.9439	12.1254	19.8416	23.1485	22.0462	37.4786	0.06063	35.4944	12.7868	10.9129	4.73994	1.02405	0.82343	1.18058	0.07385	0.13558	0.60672	11.582	14.6277	13.7447	4.40925	7.71618	13.2277	7.71618	6.61387	13.2277	12.1254
Solomon Islands		0	0	0	0	0	0	0	0	0	0	0	0	0	0	0	0	0	0	0	0	0	0	0	0	0	0	0	0	0	0	0	0
Sri Lanka		2.20462	2.20462	36.3763	45.1948	62.8317	38.5809	160.937	145.946	5.07063	7.82641	2.29281	3.85809	2.97624	3.37307	4.40925	6.61387	3.30693	3.30693	3.30693	2.20462	2.20462	1.10231	29.7624	105.822	28.6601	103.617	78.2641	76.0595	80.4687	111.333	120.152	156.528
Taiwan		6589.18	6058.96	6978.16	9599.87	11389.8	12104.4	14872.5	16211.2	18578	19680.5	18935.6	20659.1	24176	26702.3	28152	29030	32948.6	37424.3	40567.7	43695.5	51956.9	53552	59514.9	63151	64671.5	66012.5	69084.3	72281.3	69396	66198.8	70002.7	73330.6
Thailand		1620.29	1855.14	2483.73	2353.43	2864.91	5983.35	6297.05	7902.97	8464.36	10174.4	14227.9	16618.1	17820.1	18516.9	20636.5	23095.5	27819.8	28705.1	24590.4	24478.6	24173.7	27409	27707.7	27636.1	30968.1	32640.9	33156	35303.9	38287.1	36738.9	39340.4	41625.5
Timor-Leste (East Timor)		--	--	--	--	--	--	--	--	--	--	--	--	--	--	--	--	--	--	--	--	--	--	--	0	0	0	0	0	0	0	0	0
Tonga		0	0	0	0	0	0	0	0	0	0	0	0	0	0	0	0	0	0	0	0	0	0	0	0	0	0	0	0	0	0	0	0
U.S. Pacific Islands		0	0	0	0	0	0	0	0	0	0	0	0	0	0	0	0	0	0	0	0	0	0	0	0	0	0	0	0	0	0	0	0
Vanuatu		0	0	0	0	0	0	0	0	0	0	0	0	0	0	0	0	0	0	0	0	0	0	0	0	0	0	0	0	0	0	0	0
Vietnam		5189.68	4981.35	5509.35	5544.63	5549.04	6476.08	5510.45	6149.8	4824.82	5007.8	4607.66	4620.89	4020.13	4389.4	4362.95	6942.36	7518.87	8968.41	9009.19	8321.35	8606.85	9889.94	10858.9	11464	13519.8	14904.4	18554.1	19829.5	24992.7	24662	29696.3	23930.1
Wake Island		0	0	0	0	0	0	0	0	0	0	0	0	0	0	0	0	0	0	0	0	0	0	0	0	0	0	0	0	0	0	0	0
World		4.12451e+06	4.21725e+06	4.30479e+06	4.42576e+06	4.67974e+06	4.83407e+06	4.92254e+06	5.07026e+06	5.21986e+06	5.22207e+06	5.20836e+06	4.96085e+06	4.86487e+06	4.85188e+06	4.89916e+06	4.99118e+06	5.10814e+06	5.12439e+06	5.1434e+06	5.06696e+06	5.28184e+06	5.32802e+06	5.43845e+06	5.78647e+06	6.09476e+06	6.49227e+06	6.80178e+06	7.10323e+06	7.31668e+06	7.48708e+06	7.77028e+06	8.14431e+06
