# Supplementary material
Source: MDPI journal article supplement (https://www.mdpi.com/1099-4300/15/12/5565)
Supplement: s2 [file s2 › Sources/Raw Data/Total_Oil_Supply_(Thousand_Barrels_Per_Day).xls]

## Sheet: Data3
Table: Total Oil Supply (Thousand Barrels Per Day)
		1980	1981	1982	1983	1984	1985	1986	1987	1988	1989	1990	1991	1992	1993	1994	1995	1996	1997	1998	1999	2000	2001	2002	2003	2004	2005	2006	2007	2008	2009	2010	2011	2012	2013
Bermuda		0	0	0	0	0	0	0	0	0	0	0	0	0	0	0	0	0	0	0	0	0	0	0	0	0	0	0	0	0	0	0	0	0	NA
Canada		1816.23	1662.74	1639.44	1691.61	1809.71	1848.34	1862.62	1960.26	2056.74	2030.73	2040.12	2040.99	2125.81	2250.2	2340.7	2453.13	2500.97	2626.67	2700.46	2632.96	2753.14	2816.36	2953.7	3113.65	3139.36	3096.33	3292.59	3448.56	3343.58	3318.83	3441.73	3597.33	3867.96	NA
Greenland		0	0	0	0	0	0	0	0	0	0	0	0	0	0	0	0	0	0	0	0	0	0	0	0	0	0	0	0	0	0	0	0	0	NA
Mexico		2129	2554	3003	2954	3049.54	3027.28	2802.54	2897.77	2888.95	2913.33	2991.71	3149.02	3133.85	3139.99	3158.63	3075.21	3293.47	3421.93	3501.57	3354.29	3460.09	3570.03	3593.35	3807.68	3847.93	3784.07	3711.9	3500.29	3184.16	3000.79	2978.6	2959.99	2936.01	NA
Saint Pierre and Miquelon		0	0	0	0	0	0	0	0	0	0	0	0	0	0	0	0	0	0	0	0	0	0	0	0	0	0	0	0	0	0	0	0	0	NA
United States		10809	10738.7	10782.6	10787.8	11107.4	11192.4	10905.2	10647.6	10473.1	9880.41	9677.55	9882.71	9768.17	9601.95	9412.87	9399.89	9444.55	9460.94	9278.01	8993.41	9057.78	8957.01	8998.43	8760.66	8716.49	8329.16	8317.01	8469.37	8564.23	9133.13	9692.43	10135.6	11126.8	NA
Antarctica		0	0	0	0	0	0	0	0	0	0	0	0	0	0	0	0	0	0	0	0	0	0	0	0	0	0	0	0	0	0	0	0	0	NA
Antigua and Barbuda		0	0	0	0	0	0	0	0	0	0	0	0	0	0	0	0	0	0	0	0	0	0	0	0	0	0	0	0	0	0	0	0	0	NA
Argentina		508	513	507	504	498	485	471.054	471.523	492.124	496.397	520.807	529.192	597.285	646.68	712.924	774.199	821.321	905.077	916.888	870.022	831.745	876.073	865.589	865.759	825.082	797.086	802.285	781.225	801.043	801.658	790.509	763.681	735.203	NA
Aruba		--	--	--	--	--	--	0	0	0	0	-0.06823	0.03858	-0.02753	-0.02753	0	0	0	0	0	0	2.35606	2.36251	2.36251	2.36251	2.35606	2.35094	2.23502	2.47712	2.46486	2.81073	2.81073	2.81073	2.81073	NA
Bahamas, The		0	0	0	0	0	0	0	0	0	0	0	0	0	0	0	0	0	0	0	0	0	0	0	0	0	0	0	0	0	0	0	0	0	NA
Barbados		0	0	1	1	2	2	1.85393	1.21972	1.15633	0.95179	1.09747	1.04947	1.23329	1.13191	1.08796	1.12064	1.18265	0.81214	1.60741	1.94141	1.53	1.271	1	1	1.00223	1	1.03372	1.10849	1.101	0.766	1.001	1.001	1.001	NA
Belize		0	0	0	0	0	0	0	0	0	0	0	0	0	0	0	0	0	0	0	0	0	0	0	0	0	0	2.25731	2.9998	3.51066	3.9895	4.25168	4	3.23934	NA
Bolivia		32	26	30	28	27	26	23.3386	23.5722	24.4506	25.4624	25.9726	25.9918	28.4992	30.2516	31.3778	35.3644	37.9211	38.5104	44.3171	41.8087	40.4352	44.8533	47.2201	42.9201	61.3381	62.6646	61.3164	61.8255	51.5574	45.9594	47.8765	49.2747	54.178	NA
Brazil		244.5	283.06	348.19	459.51	614.37	734.35	739.971	767.534	750.795	789.531	821.117	838.449	823.522	839.399	957.171	989.774	1106.54	1172.16	1282.36	1427.65	1534.11	1573.49	1757.89	1846.9	1839.48	2037.52	2169.46	2283.5	2431.47	2561.71	2712.47	2685.15	2651.94	NA
Cayman Islands		0	0	0	0	0	0	0	0	0	0	0	0	0	0	0	0	0	0	0	0	0	0	0	0	0	0	0	0	0	0	0	0	0	NA
Chile		46	52	54	50	50	47.6	44.2008	43.2176	37.7135	35.6843	35.3171	31.717	29.3714	30.1946	29.0952	26.457	25.7066	18.8471	18.434	17.9383	16.3619	17.1719	17.1416	16.9333	15.7599	15.3212	13.0387	10.6705	12.1263	12.9769	18.4218	18.3615	17.3371	NA
Colombia		134	133	149	158	174	182	315.155	396.019	387.251	416.669	453.998	429.776	444.811	467.32	462.417	597.054	642.054	665.35	746.02	830.194	704.116	636.824	588.276	554.676	541.956	540.687	548.352	546.108	603.674	690.277	805.89	938.543	969.16	NA
Costa Rica		0	0	0	0	0	0	-0.17203	-0.14961	-0.10851	-0.22843	-0.17458	-0.15723	-0.22425	-0.25548	-0.13098	-0.32976	-0.29308	-0.31206	-0.02694	0	-0.00013	0.07138	0.47779	0.72921	1.02257	1.87715	1.85578	2.63658	2.30845	1.22606	0.39068	0.29068	0.29068	NA
Cuba		6	9	11	13	16	19	17.05	16.8731	13.2835	12.834	12.2177	11.9597	16.4647	19.4102	24.2704	25.9977	31.211	33.1788	34.7575	40.8203	43.878	51.4624	48.544	56.2755	59.2131	53.4552	52.2497	51.6339	50.6991	46.342	51.5276	53.7276	50.8041	NA
Dominica		0	0	0	0	0	0	0	0	0	0	0	0	0	0	0	0	0	0	0	0	0	0	0	0	0	0	0	0	0	0	0	0	0	NA
Dominican Republic		1	1	1	1	1	1	-0.15494	0.04351	0.03715	0.09047	-0.11591	-0.18446	-0.89136	-0.5117	-0.43783	-0.96174	-0.86759	-0.95509	-0.95518	-0.37135	-0.15427	-0.09473	-0.06702	0.01195	-0.44867	-0.38925	-0.30857	-0.39215	-0.26603	0.03457	0.0611	0.0611	0.0611	NA
Ecuador		207	214	214	240	261	284	294.551	175.302	303.46	280.522	286.478	300.642	323.941	348.691	370.009	395.859	397.661	389.35	376.689	374.042	396.311	412.511	392.719	411.342	529.006	532.755	536.38	511.422	505.269	485.707	487.308	500.604	504.508	NA
El Salvador		0	0	0	0	0	0	0.00264	-0.04769	-0.05528	0.01508	-0.06151	-0.11051	-0.04311	-0.0171	0.03199	-0.05459	-0.14135	-0.31024	-0.49988	-0.58057	-0.59126	-0.6693	-0.27777	-0.10589	-0.20429	0.96612	5.30788	4.29737	4.18243	1.77155	-0.51666	-0.51366	-0.51366	NA
Falkland Islands (Islas Malvinas)		0	0	0	0	0	0	0	0	0	0	0	0	0	0	0	0	0	0	0	0	0	0	0	0	0	0	0	0	0	0	0	0	0	NA
French Guiana		0	0	0	0	0	0	0	0	0	0	0	0	0	0	0	0	0	0	0	0	0	0	0	0	0	0	0	0	0	0	0	0	0	NA
Grenada		0	0	0	0	0	0	0	0	0	0	0	0	0	0	0	0	0	0	0	0	0	0	0	0	0	0	0	0	0	0	0	0	0	NA
Guadeloupe		0	0	0	0	0	0	0	0	0	0	0	0	0	0	0	0	0	0	0	0	0	0	0	0	0	0	0	0	0	0	0	0	0	NA
Guatemala		5	5	6	7	5	3	5.06185	4.02652	3.02382	4.02924	3.90803	4.43332	4.57746	6.83251	8.14947	9.38714	12.6705	15.5283	23.668	23.1104	20.504	20.9409	17.9031	21.9945	19.8115	17.1739	21.465	18.7411	18.4418	16.5439	16.077	15.0272	14.0172	NA
Guyana		0	0	0	0	0	0	0	0	0	0	0	0	0	0	0	0	0	0	0	0	0	0	0	0	0	0	0	0	0	0	0	0	0	NA
Haiti		0	0	0	0	0	0	0	0	0	0	0	0	0	0	0	0	0	0	0	0	0	0	0	0	0	0	0	0	0	0	0	0	0	NA
Honduras		0	0	0	0	0	0	-0.01458	-0.00804	-0.01308	-0.06146	-0.14273	-0.1406	-0.09501	0	0	0	0	0	0	0	0	0	0	0	0	0.001	0.02	0.02	0.02	0.02	0.02	0.02	0.02	NA
Jamaica		0	0	0	0	0	0	-0.65598	-0.41034	-0.37482	-0.46555	-0.58362	-0.37701	-0.57096	-0.19817	-0.32807	-0.49304	-0.42789	-0.4202	-0.41484	-0.22539	-0.55761	-0.411	1.30666	2.05014	1.50699	1.84236	4.58483	4.34633	5.70469	5.97811	1.11961	2.11961	2.11961	NA
Martinique		0	0	0	0	0	0	0.02918	0.02652	0.02535	0.04889	0.01677	0.01855	0.01816	-0.13517	-0.09217	-0.08052	-0.07887	-0.07835	-0.0765	-0.0765	-0.07508	-0.06992	-0.06383	-0.08246	-0.08994	-0.0785	-0.09705	-0.08079	-0.08815	-0.24923	-0.24923	-0.24923	-0.24923	NA
Montserrat		0	0	0	0	0	0	0	0	0	0	0	0	0	0	0	0	0	0	0	0	0	0	0	0	0	0	0	0	0	0	0	0	0	NA
Netherlands Antilles		4	4	4	4	4	4	-0.04836	0.68193	0.4485	-0.16795	-0.52805	-1.20941	-1.67435	-1.51979	-1.5017	-1.41023	-1.39489	-1.45815	-1.51524	-0.04502	-0.75737	-2.16916	-1.00718	-0.26368	-0.02917	-0.58477	-0.73755	0.53109	0.66101	-0.41157	1.49587	1.49587	1.49587	NA
Nicaragua		0	0	0	0	0	0	-0.1612	-0.16503	-0.16053	-0.16566	-0.16926	-0.1283	-0.12946	-0.08209	-0.07825	-0.07669	0.01293	-0.14147	-0.48178	-0.44652	-0.38638	-0.49056	-0.394	-0.37958	-0.43606	-0.367	-0.41205	-0.37737	0.57379	0.61124	-0.3535	-0.1535	-0.1535	NA
Panama		1	1	1	1	1	0	-0.43438	-0.45091	-0.15414	-0.13193	-0.14576	-0.62936	-1.24584	-1.19028	-0.58001	0.00989	-1.25158	-0.57986	-0.82758	-1.38141	-1.30457	-2.19515	-0.13995	0	0	0	0	0	0	0	0	0	0	NA
Paraguay		0	0	0	0	0	0	0.06416	0.06781	0.07196	0.07714	0.10436	0.07407	8e-05	0.0517	0.04531	-0.02366	-0.02031	-0.03267	-0.02226	-0.02654	-0.00267	-0.00243	-0.00925	-0.00574	0.09053	0.62697	0.8	1.1	1.7	2.2	2.3	2.2	2	NA
Peru		200	199	201	174	187	193	176.782	162.144	139.58	128.742	127.975	113.797	115.162	125.886	127.5	129.818	120.504	119.338	115.779	107.198	99.5655	95.9997	96.6487	92.0119	93.7792	112.14	119.048	115.938	121.785	148.864	163.805	159.768	160.428	NA
Puerto Rico		0	-1	-2	-1	2.4	-1	-1.01673	1.03909	1.0457	0.84358	1.8025	2.82655	1.53448	4.67653	3.31615	1.68011	1.82465	1.62863	1.37951	0.89397	0.45721	-0.13211	0.43608	0.72181	1.35395	1.34917	0.08543	1.3276	0.66277	0.53813	0	0.8536	0.6737	NA
Saint Kitts and Nevis		0	0	0	0	0	0	0	0	0	0	0	0	0	0	0	0	0	0	0	0	0	0	0	0	0	0	0	0	0	0	0	0	0	NA
Saint Lucia		0	0	0	0	0	0	0	0	0	0	0	0	0	0	0	0	0	0	0	0	0	0	0	0	0	0	0	0	0	0	0	0	0	NA
Saint Vincent/Grenadines		0	0	0	0	0	0	0	0	0	0	0	0	0	0	0	0	0	0	0	0	0	0	0	0	0	0	0	0	0	0	0	0	0	NA
Suriname		0	0	0	0	0	1	2	2	3	4	3.9	3.5	5	5	6	7	7.49727	5	7	10	9.58533	9.49617	9.49617	9.46166	9.46111	9.43937	11.0182	12.9605	15.2668	15.419	15.4416	15.4416	15.2749	NA
Trinidad and Tobago		213.9	243	182.8	163	173	178	166.413	155.828	155.91	153.135	148.91	152.109	140.001	140.039	137.37	138.034	136.951	130.709	129.516	138.932	140.1	132.729	144.112	161.171	151.037	170.75	179.414	156.519	156.634	153.361	145.793	138.433	119.315	NA
Turks and Caicos Islands		0	0	0	0	0	0	0	0	0	0	0	0	0	0	0	0	0	0	0	0	0	0	0	0	0	0	0	0	0	0	0	0	0	NA
Uruguay		0	0	0	0	0	0	0.15302	0.24685	0.11182	0.08454	0.16485	0.27341	0.34317	0.1684	0.25	-0.00079	0.16605	0.46425	0.46641	0.50147	0.36619	0.51138	0.43503	0.51349	0.93574	0.97608	1.03742	0.96333	1.00084	0.76474	1.08286	1.18286	1.18286	NA
Venezuela		2246	2177	1973	1874	1872	1757	1890.2	1857.25	2008.21	2024.73	2262.18	2509.84	2519.65	2634.3	2796.29	2982.24	3175.44	3517.55	3408.8	3109.22	3460.76	3333.99	2924.2	2581.43	2855.17	2866.93	2746.53	2681.99	2655.7	2509.75	2405	2489.24	2489.24	NA
Virgin Islands, U.S.		0	0	0	-1	-0.6	0.2	-5.45328	-4.11259	-2.99331	-4.49359	-0.78606	0.61679	0.38517	0.13236	8.40878	10.1107	11.8944	12.2696	13.6525	12.6063	14.6829	14.3349	14.6522	17.1112	17.619	17.5788	17.6228	16.8684	16.645	16.7666	14.8804	14.8804	14.8804	NA
Virgin Islands, British		0	0	0	0	0	0	0	0	0	0	0	0	0	0	0	0	0	0	0	0	0	0	0	0	0	0	0	0	0	0	0	0	0	NA
Albania		44	44	64	75	55	55	54.6135	53.6203	43.5759	46.7358	29.7137	18.6247	10.3377	11.119	11.4002	9.89735	9.64646	9.34538	6.41554	5.56864	5.6601	5.99404	6.32234	6.72214	6.69884	6.98491	7.81407	6.50125	6.03628	5.39109	10.8731	15.5443	16.8653	NA
Austria		30.3	28	29	28	27	25	25.1744	24.3735	26.7653	27.2661	26.6121	29.8171	27.4487	26.0641	26.293	27.6606	26.6632	24.0133	25.704	23.2293	24.7469	25.2853	26.8939	25.9085	26.4619	24.92	26.9187	27.6831	27.3545	28.1915	28.7144	30.392	29.4828	NA
Belgium		8	8	9	10	11	11	6.06952	5.55078	8.19025	10.6171	10.5779	9.12369	10.3886	9.79499	12.691	12.1233	11.4589	10.966	10.9112	11.7992	10.2181	12.3046	13.0609	11.0603	10.6876	8.69059	11.7088	11.2241	8.5207	12.6035	12.7001	10.5304	10.5304	NA
Bosnia and Herzegovina		--	--	--	--	--	--	--	--	--	--	--	--	0	0	0	0	0	0	0	0	0	0	0	0	0	0	-0.07291	-0.05931	-0.09745	-0.0936	-0.03195	-0.03195	-0.03195	NA
Bulgaria		3	3	3	3	4	6	-0.17701	0.09789	-1.53749	4.72227	3.49063	0.03394	0.40748	0.59237	0.22167	1.05968	1.61687	0.85563	2.23854	2.63432	1.96207	1.16243	2.64813	3.12806	3.66126	3.35651	3.37787	3.12498	3.51701	3.3409	3.58363	3.38363	3.38363	NA
Croatia		--	--	--	--	--	--	--	--	--	--	--	--	40.7932	42.5611	47.8015	41.7535	37.8767	38.5682	40.3566	33.4337	33.4175	32.4094	31.2224	31.3301	28.7779	27.6909	25.6287	23.8358	22.0988	24.4447	23.8247	21.8932	20.0745	NA
Cyprus		0	0	0	0	0	0	0.01948	-0.01473	-0.01127	0.02266	0.04659	-0.03449	-0.12105	-0.20818	-0.1362	-0.16718	0.05352	-0.28656	-0.31733	-0.36819	-0.36403	-0.35684	-0.25876	-0.19136	-0.07285	0.02	0.02	0.02	0.2	0.2	0.1	0.1	0.00847	NA
Czech Republic		--	--	--	--	--	--	--	--	--	--	--	--	--	2.49684	2.78653	3.90668	5.28298	4.52385	4.58905	9.58684	9.36243	9.24546	12.4754	15.3459	17.1668	17.5445	15.8318	13.7441	10.9086	10.3897	10.283	13.0123	10.0091	NA
Denmark		5.2825	14.7459	34.1658	44.3428	45.861	58.075	76.1879	96.882	98.8598	116.94	121.127	143.631	163.43	174.337	185.61	187.307	210.064	233.255	240.625	302.639	365.179	348.99	373.432	378.409	392.745	380.784	345.74	315.29	290.394	264.308	249.465	226.284	207.384	NA
Faroe Islands		0	0	0	0	0	0	0	0	0	0	0	0	0	0	0	0	0	0	0	0	0	0	0	0	0	0	0	0	0	0	0	0	0	NA
Finland		-0.4318	0.8412	2.0142	3.0672	4.18552	4.22003	4.76423	5.38922	5.44508	5.23831	5.71853	6.57835	7.4276	7.53177	8.91368	9.24073	8.94997	8.35945	9.11999	8.9777	8.27969	7.8004	9.01284	9.28445	9.15518	9.17124	10.1887	9.78874	8.53291	9.54122	15.3034	14.2309	13.5309	NA
Former Czechoslovakia		2.08975	2.09	2.1	2.1	-4.48773	-4.27101	-2.71614	-2.20843	-0.84436	-0.17926	0.84412	2.14145	2.23293	--	--	--	--	--	--	--	--	--	--	--	--	--	--	--	--	--	--	--	--	NA
Former Serbia and Montenegro		--	--	--	--	--	--	--	--	--	--	--	--	22.684	22.5774	26.6053	24.8793	24.7999	22.5808	21.3814	20.9353	18.743	18.1593	17.1628	16.5519	16.4119	15.5861	--	--	--	--	--	--	--	NA
Former Yugoslavia		88	88	89	87	84	90	87.1176	89.7829	87.3908	76.8474	71.7525	67.7076	--	--	--	--	--	--	--	--	--	--	--	--	--	--	--	--	--	--	--	--	--	NA
France		83	92	86	89	93	106	107.189	111.381	119.316	116.161	111.527	112.953	114.075	112.489	115.785	110.011	105.209	97.2843	89.2164	92.5836	93.209	90.133	86.2138	90.2364	89.1049	84.2502	88.9164	74.6323	73.078	76.3116	76.5425	75.8821	72.3034	NA
Germany		--	--	--	--	--	--	--	--	--	--	--	148.019	131.716	136.887	127.04	125.569	125.601	125.18	129	129.618	134.96	129.52	135.702	139.072	124.671	153.743	165.644	120.361	124.899	133.061	125.002	141	144.508	NA
Germany (Offshore)		0	0	0	0	0	0	0	0	0	0	0	0	0	0	12	12	12	9	10	12	16	17.111	18.6137	21.0027	22.6694	23.7589	26.5863	25.2411	20.8197	23.7288	20.8822	24.0877	25	NA
Germany, East		-6.216	-6.616	-7	-5.598	3.89993	0.60049	1.08007	1.81014	2.23889	2.53431	3.95705	--	--	--	--	--	--	--	--	--	--	--	--	--	--	--	--	--	--	--	--	--	--	NA
Germany, West		124.431	108.468	116.652	129.087	139.973	148.213	147.583	143.369	154.644	149.225	150.971	--	--	--	--	--	--	--	--	--	--	--	--	--	--	--	--	--	--	--	--	--	--	NA
Gibraltar		0	0	0	0	0	0	0	0	0	0	0	0	0	0	0	0	0	0	0	0	0	0	0	0	0	0	0	0	0	0	0	0	0	NA
Greece		1	10	24	28.5	31	30	24.1229	24.6321	24.4028	20.627	18.8809	19.062	19.8002	15.416	14.4211	12.1714	10.7052	11.6387	9.64599	3.29279	7.65055	8.01615	6.6362	5.41931	5.23814	5.74675	6.62979	5.13801	6.00839	6.41675	8.47986	7.57805	7.49677	NA
Hungary		58	58	62	61	62.6117	63.2049	63.6757	60.2039	64.9372	53.5174	57.7031	49.1388	48.6568	47.0362	62.9286	60.3975	62.7003	68.0873	53.5701	49.622	49.415	48.7408	42.9574	45.5294	47.5345	42.279	39.6772	32.8169	36.9994	35.3666	34.4585	27.6404	27.9886	NA
Iceland		0	0	0	0	0	0	0	0	0	0	0	0	0	0	0	0	0	0	0	0	0	0	0	0	0	0	0	0	0	0	0	0	0	NA
Ireland		-0.614	-0.1978	-0.1122	-0.1368	-0.13203	-0.14236	-0.23	-0.21023	-0.10048	-0.07443	-0.21113	-0.22965	-0.22982	-0.24379	-0.37638	-0.25154	-0.25269	-0.36858	-0.4165	-0.36543	-0.40643	-0.22507	-0.11943	-0.04206	-0.15343	-0.05116	-0.62357	-0.5571	-0.45946	-0.2957	1.07504	0.72561	0.72561	NA
Italy		68	68	65	78	82	84	67.0869	85.0216	108.867	101.594	109.381	104.168	112.438	112.895	118.461	126.393	136.196	148.772	143.787	122.088	134.522	122.24	129.839	142.889	153.211	164.814	166.532	168.61	160.786	145.526	156.143	152.721	154.511	NA
Luxembourg		0	0	0	0	0	0	0	0	0	0	0	0	0	0	0	0	0	0	0	0	0	0	0	0	0	0	0	0	0	0	0	0	0	NA
Macedonia		--	--	--	--	--	--	--	--	--	--	--	--	-0.39621	-0.24952	0.05567	-0.0116	-0.0246	-0.17245	-0.10194	-0.14626	-0.14587	-0.18961	-0.12991	-0.08006	-0.07814	-0.04487	-0.04388	-0.06623	-0.09732	-0.1457	0.03087	0.04087	0.04087	NA
Malta		0	0	0	0	0	0	0	0	0	0	0	0	0	0	0	0	0	0	0	0	0	0	0	0	0	0.04	0.04	0.02	0.02	0.02	0	0	0	NA
Montenegro		--	--	--	--	--	--	--	--	--	--	--	--	--	--	--	--	--	--	--	--	--	--	--	--	--	--	0	0	0	0	0	0	0	NA
Netherlands		30.747	33.368	52.568	66.527	82.3977	100.794	123.434	118.312	108.702	99.3767	107.716	106.171	86.4005	90.222	74.0313	71.7347	76.5311	74.875	76.3644	70.4999	72.1855	63.1591	57.6193	51.1722	48.5942	47.5054	38.0492	41.1225	31.4771	37.8312	34.842	40.9809	54.7248	NA
Netherlands (Offshore)		0	0	0	0	0	0	0	0	0	0	0	0	0	0	58.227	45.9726	36.2377	32.7425	32	20	16	18.326	40.7589	49.7756	47.6284	36.9836	32.5753	43.8931	34.0738	25.5644	20.3014	17.5863	16.9973	NA
Norway		528.743	513.818	533.739	664.137	755.697	826.742	910.27	1056.23	1199.27	1569.53	1724.57	1962.18	2224.92	2384.64	2700.45	2909.93	3240.89	3289.61	3146.6	3147.84	3354.61	3422.98	3341.88	3272.96	3196.59	2978.21	2786.14	2564.89	2463.92	2352.56	2134.62	2007.35	1902.08	NA
Poland		8	8	5.5	5	5.78528	5.83648	6.37395	5.68756	5.74098	4.4209	4.50988	5.07251	6.60849	8.25439	8.56427	8.26511	9.18497	10.4806	13.8721	17.8406	22.8069	24.7933	23.0174	22.54	34.7912	39.2674	41.0509	35.2317	35.276	34.246	28.6592	28.3395	27.6845	NA
Portugal		-2.621	-2.2548	-3.0638	-2.7628	-1.43238	-0.84516	-0.38117	-0.43786	0.29277	-0.41416	-0.27221	-0.92524	-1.17171	-0.77163	0.65986	2.83669	2.98686	3.38499	3.15656	3.05958	2.40889	3.88537	3.74534	4.53724	3.84869	4.05163	5.7071	6.35641	6.96014	5.41664	5.57404	5.17594	5.24991	NA
Romania		252	255	255.7	255	252	235	232.567	226.829	202.899	189.853	167.101	145.826	146.939	142.788	149.114	148.977	150.241	149.592	147.416	139.926	137.159	139.588	140.428	133.658	131.632	124.722	116.641	115.651	116.984	112.699	107.145	105.341	101.648	NA
Serbia		--	--	--	--	--	--	--	--	--	--	--	--	--	--	--	--	--	--	--	--	--	--	--	--	--	--	16.9475	16.8574	18.5123	19.9912	23.7251	21.3059	19.7223	NA
Slovakia		--	--	--	--	--	--	--	--	--	--	--	--	--	0.79966	1.09459	1.9769	2.0734	2.01305	1.70563	1.55202	3.19072	4.0666	8.99217	9.8725	11.1612	12.8667	13.3294	8.60999	10.3009	7.53781	7.68135	9.85793	9.27711	NA
Slovenia		--	--	--	--	--	--	--	--	--	--	--	--	-0.13579	0.0046	-0.10457	-0.04579	0.01939	-0.05498	0.07271	0.02237	0.02833	0.01557	0.01505	0.01185	0.006	0.105	0.105	0.105	0.165	0.145	0.405	0.305	0.305	NA
Spain		12.92	3.94	12.58	45.821	37.111	40.158	46.7563	43.7556	45.6342	38.7309	37.3787	41.7663	42.5364	34.242	34.4098	32.2624	26.4976	22.8229	24.8668	21.9382	23.8275	27.6553	27.8576	33.1698	37.8872	37.5467	36.6561	28.2096	25.3903	29.49	28.7512	28.4562	29.2918	NA
Sweden		-6.175	-4.3418	-3.4278	-3.7348	0.05794	0.26928	1.97853	2.49037	2.37445	1.6453	1.59095	0.90224	1.25336	1.1152	0.77456	2.1056	2.12613	1.7583	1.92564	2.3186	1.56605	2.07054	3.50085	4.11898	4.60833	3.94963	5.87194	7.27194	8.4702	11.1915	10.4195	11.2666	11.2666	NA
Switzerland		1.067	1.2932	1.1242	1.0718	1.29755	1.59302	1.74176	1.62531	1.40868	1.20937	1.16354	1.37516	1.1749	1.44166	1.59019	1.56494	1.72418	1.96453	2.19205	2.04627	1.70653	1.81901	1.94969	1.62806	3.36102	3.32237	3.46384	3.50384	3.65681	3.87793	3.60576	3.61281	3.61281	NA
Turkey		40.973	43.7442	45.692	40.591	39.619	39.6047	44.6152	48.4569	46.1589	53.3847	70.2766	85.2887	80.9655	74.1459	71.5694	66.1317	66.1475	67.2338	66.1264	58.3809	51.4192	46.8281	47.0884	45.8158	42.9282	45.9648	45.05	45.8431	47.7335	54.5964	57.7502	57.6335	56.6533	NA
United Kingdom		1674.25	1873.61	2164.45	2430.11	2652.07	2711.48	2735.07	2612.84	2442.72	1996.63	1982.15	1994.68	2044.89	2143.59	154.098	163.89	171.138	167.239	168.867	147.377	127.067	117.225	114.034	103.359	96.8275	91.4615	90.4569	88.8849	85.144	87.3814	87.1301	82.6546	86.1704	NA
United Kingdom (Offshore)		0	0	0	0	0	0	0	0	0	0	0	0	0	0	2500.18	2654.66	2720.54	2647.54	2749.25	2835	2439.96	2477.47	2447.97	2288.37	1977.54	1770.9	1602.14	1601.8	1502.86	1422.14	1318.74	1084.07	922.381	NA
Armenia		--	--	--	--	--	--	--	--	--	--	--	--	0	0.00025	0	0	0	0	0	0	0	0	0	0	0	0	0	0	0	0	0	0	0	NA
Azerbaijan		--	--	--	--	--	--	--	--	--	--	--	--	222.247	206.45	191.183	180.543	180.318	179.91	236.71	283.61	288.587	308.862	315.418	325.175	317.634	440.006	646.58	849.069	878.193	1015.95	1044.86	993.225	931.882	NA
Belarus		--	--	--	--	--	--	--	--	--	--	--	--	41.5231	34.7557	36.4567	34.1157	33.0938	33.599	33.9999	33.9471	34.6879	35.372	33.4692	34.3313	35.031	35.1546	35.6021	36.0109	35.2956	32.0629	32.0783	32.0683	32.0683	NA
Estonia		--	--	--	--	--	--	--	--	--	--	--	--	-0.08259	-0.06626	-0.02485	0	0	7.34	4.4	3.02	4.747	5.13362	5.5304	6.13796	6.59204	6.9	7.28	7.40002	7.6	9	10	11	11	NA
Former U.S.S.R.		11991	12150	12227	12302	12201	11935	12226.1	12389.5	12424.5	12025.5	11300.9	10313.4	--	--	--	--	--	--	--	--	--	--	--	--	--	--	--	--	--	--	--	--	--	NA
Georgia		--	--	--	--	--	--	--	--	--	--	--	--	2.88939	1.99832	1.82935	0.99203	1.19042	2.67287	2.17162	2.15351	1.99003	2.10783	1.46248	2.7807	1.9791	1.97739	0.99486	0.98383	0.97868	0.99321	1	1	1	NA
Kazakhstan		--	--	--	--	--	--	--	--	--	--	--	--	442.605	406.727	416.466	414.791	458.768	522.032	526.901	604.917	725.629	835.971	967.514	1061.97	1245.87	1337.17	1387.87	1445.65	1430.94	1541.57	1608.69	1638.35	1605.88	NA
Kyrgyzstan		--	--	--	--	--	--	--	--	--	--	--	--	2.264	2	1.64	2	1.98	1.82472	1.73436	1.66184	2.02986	2.01058	1.50952	1.35818	1.36466	1.95843	1.97912	0.94623	0.94308	0.99983	-0.8424	-0.8424	-0.8424	NA
Latvia		--	--	--	--	--	--	--	--	--	--	--	--	0	0	0	0	0	0	0	0	0	0	0	0	0.2	0.3	0.3	0.5	0.9	1.2	1.1	1	1	NA
Lithuania		--	--	--	--	--	--	--	--	--	--	--	--	-0.45759	3.62011	5.16078	5.58042	6.45953	7.13075	9.48858	8.30742	9.55052	13.4816	13.4374	12.362	11.4108	9.83302	8.37471	7.61921	10.0421	9.45376	9.71077	9.11077	9.11077	NA
Moldova		--	--	--	--	--	--	--	--	--	--	--	--	0	0	0	0	0	0	0	0	0	0	0	0	0	0	0	0	-0.00996	-0.02464	-0.01731	-0.01731	-0.01731	NA
Russia		--	--	--	--	--	--	--	--	--	--	--	--	7818.72	6951.01	6306.86	6172.49	6016.56	6101.09	6069.67	6312.32	6723.64	7159.73	7658.89	8534.78	9273.77	9511.24	9677.4	9878.39	9797.15	9933.83	10156.9	10239.2	10397	NA
Tajikistan		--	--	--	--	--	--	--	--	--	--	--	--	1.311	0.8	0.6	0.7	0.62567	0.62657	0.50303	0.49803	0.39202	0.32903	0.31178	0.35478	0.25277	0.2821	0.30303	0.28317	0.23794	0.2228	0.2198	0.2198	0.21855	NA
Turkmenistan		--	--	--	--	--	--	--	--	--	--	--	--	110.24	90.5531	87.272	82.301	89.6581	105.915	126.175	154.259	156.636	167.875	192.568	200.001	213.943	196.65	177.212	180.731	189.364	197.644	201.871	222.919	244.069	NA
Ukraine		--	--	--	--	--	--	--	--	--	--	--	--	81.654	84.2239	89.8535	87.9737	91.5922	94.6885	89.6997	87.4798	84.8914	86.7481	85.4599	88.8442	96.8854	99.3872	107.756	107.711	99.3876	93.5594	83.2634	78.9019	80.404	NA
Uzbekistan		--	--	--	--	--	--	--	--	--	--	--	--	66.161	85.6988	115.429	160.323	163.948	157.452	161.153	147.464	151.916	156.044	153.256	155.996	142.007	125.333	107.496	112.495	109.975	107.019	106.752	106.166	102.583	NA
Bahrain		57	55	53	52	51	49	52.6836	51.8786	52.5326	51.9585	47.9598	43.8518	44.6177	54.5956	55.0151	52.8237	46.3584	53.7141	49.3105	49.5699	49.775	49.2546	49.3929	49.5896	50.6061	47.5248	48.8532	48.4346	48.5978	48.6854	47.1577	48.1577	49.1577	NA
Iran		1683	1402	2236	2460	2196	2272	2043.93	2313.32	2253.24	2830.68	3113.04	3357.6	3476.16	3591.23	3672.47	3708.6	3747.67	3727.91	3703.33	3620.59	3765.39	3799.99	3523.97	3833.03	4104.21	4238.58	4149.34	4039.03	4177.54	4178.3	4243.07	4225.61	3538.39	NA
Iraq		2526	1009	1021	1014	1218	1447	1696.17	2086.49	2699.01	2944.54	2064.45	301.523	421.469	522.595	567.263	579.904	593.407	1172.34	2162.14	2520.2	2581.97	2408.82	2039.79	1318.04	2020.57	1889.42	2009.44	2096.64	2384.55	2399.17	2402.88	2628.99	2986.64	NA
Israel		35	36	1	1	1	1	1.60454	1.40351	1.49166	0.8429	0.87511	-0.05471	0.1127	2.08435	2.8889	3.08268	3.52103	2.10879	3.43458	3.12693	3.66324	3.91387	2.74011	3.19412	5.95068	5.2457	3.83366	4.02907	4.023	5.98119	5.839	5.839	5.839	NA
Jordan		0	0	0	0	0	0	1.21727	0.70725	0.83916	0.45269	0.5905	0.83069	0.41389	0.06115	0.18635	0.17974	0.1729	0.18037	-0.23044	-0.16389	-0.48596	-0.26655	-0.1751	-0.14172	-0.36402	-0.25859	-0.12821	0.08777	0.70646	0.61429	0.16276	0.16076	0.16476	NA
Kuwait		1760	1195	872	1127	1233	1086	1482.69	1664.2	1579.23	1877.62	1234.11	191.397	1084.17	1896.09	2114.43	2158.52	2153.76	2121.84	2206.45	2018.2	2200.73	2125.6	2029.91	2268.31	2515.38	2671.98	2671.51	2603.43	2727.9	2505.94	2460.29	2691.82	2796.79	NA
Lebanon		0	0	0	0	0	0	-0.57726	-0.05464	0.27917	0.28534	0.32522	0.29146	0.28999	0.29865	0	0	0	0	0	0	0	0	0	0	0	0	0	0	0	0	0	0	0	NA
Oman		284	321	326	377	417	502	562.745	586.919	621.692	649.715	693.496	706.468	744.451	779.577	814.18	859.074	891.089	907.693	903.625	913.535	972.041	915.488	899.484	823.01	754.297	780.559	743.86	714.814	759.7	818.888	869.854	890.887	923.773	NA
Palestinian Territories		--	--	--	--	--	--	--	--	--	--	--	--	--	--	--	--	--	0	0	0	0	0	0	0	0	0	0	0	0	0	0	0	0	NA
Qatar		483	430	361	321	423	332	331.159	318.548	378.279	405.773	447.622	446.794	480.113	470.3	467.054	499.009	562.977	622.684	783.312	778.824	874.524	864.81	840.759	927.024	1043.22	1111.04	1138.14	1121.08	1203.83	1212.72	1440.86	1641.18	1579.18	NA
Saudi Arabia		10285	10265	6929	5430	5033	3778.01	5254.64	4673.72	5577.2	5555.18	7018.83	8789.9	9036.07	8893.57	9101.16	9235.04	9237.93	9400.13	9471.65	8907.02	9475.75	9156.64	8809.51	10076.8	10496.2	11096.3	10665.4	10248.6	10782.3	9757.17	10522.3	11154.3	11545.7	NA
Syria		164	166	160	167	170	178	190.144	225.727	259.84	337.134	385.058	490.558	478.456	557.52	563.486	583.659	600.831	579.496	572.127	557.936	546.785	513.375	519.78	510.163	488.063	463.794	438.827	411.87	400.35	400.108	404.425	334.242	182.456	NA
United Arab Emirates		1747	1538	1343	1272	1279	1356	1515.31	1686.28	1694.79	1989.52	2251.77	2531.02	2409.9	2304.75	2342.82	2395.83	2439.38	2479.59	2518.51	2337.2	2572.33	2500.04	2386.83	2660.83	2766.75	2844.63	2948.47	2947.5	3046.87	2794.55	2813.24	3088.26	3213.19	NA
Yemen		0	0	0	0	0	0	8.58627	18.7012	171.807	192.735	190.959	193.883	180.974	218.44	334.71	345.155	341.339	361.99	387.409	408.482	437.231	439.975	438.841	430.709	406.241	401.935	378.176	320.039	299.699	286.082	259.813	164.483	156.543	NA
Algeria		1143	1052	1046	1018.26	1115	1142.07	1190.26	1199.76	1173.54	1233.91	1314.65	1309.49	1341.18	1311.67	1295.62	1306.74	1376.02	1417.25	1402.43	1388.62	1433.03	1513.89	1617.65	1784.04	1844.53	1956.78	1967.49	1967.55	1954.46	1909.81	1880.97	1862.97	1875.21	NA
Angola		150	130	122	177	208	231	281.327	359.348	451.35	454.347	474.355	499.345	525.687	508.375	535.372	645.224	708.181	713.423	734.628	744.557	746.113	741.904	896.143	902.305	1054.42	1260.51	1434.92	1768.46	2014.33	1948.03	1987.76	1839.89	1871.64	NA
Benin		0	0	0	4	7	8	8	7	5	4	4	4	5.594	5.778	5.93	3	2	1.32	1	1	0.69	0.7	0.8	0.4	0	0	0	0	0	0	0	0	0	NA
Botswana		0	0	0	0	0	0	0	0	0	0	0	0	0	0	0	0	0	0	0	0	0	0	0	0	0	0	0	0	0	0	0	0	0	NA
Burkina Faso		0	0	0	0	0	0	0	0	0	0	0	0	0	0	0	0	0	0	0	0	0	0	0	0	0	0	0	0	0	0	0	0	0	NA
Burundi		0	0	0	0	0	0	0	0	0	0	0	0	0	0	0	0	0	0	0	0	0	0	0	0	0	0	0	0	0	0	0	0	0	NA
Cameroon		58	87	109	114	135	185	176.672	173.714	162.716	169.686	160.599	152.931	140.436	127.145	108.33	111.408	108.386	124.457	120.957	100.497	85.0597	76.8913	69.9008	67.2181	66.347	82.7086	86.8075	83.1567	81.7803	77.4202	65.5242	62.1845	63.5243	NA
Cape Verde		0	0	0	0	0	0	0	0	0	0	0	0	0	0	0	0	0	0	0	0	0	0	0	0	0	0	0	0	0	0	0	0	0	NA
Central African Republic		0	0	0	0	0	0	0	0	0	0	0	0	0	0	0	0	0	0	0	0	0	0	0	0	0	0	0	0	0	0	0	0	0	NA
Chad		0	0	0	0	0	0	0	0	0	0	0	0	0	0	0	0	0	0	0	0	0	0	0	36.0685	170.587	176.658	157.918	144.203	127.164	119.471	122.521	114.964	104.484	NA
Comoros		0	0	0	0	0	0	0	0	0	0	0	0	0	0	0	0	0	0	0	0	0	0	0	0	0	0	0	0	0	0	0	0	0	NA
Congo (Brazzaville)		65	83	89	87	121	120	118.731	122.883	143.893	163.883	164.837	155.734	173.71	180.767	179.7	187.747	200.741	264.634	276.633	282.928	291.907	266.35	259.962	255.523	242.927	235.876	247.296	213.651	239.878	274.487	311.912	298.912	291.912	NA
Congo (Kinshasa)		20	20	23	25	32	33	31.9615	32.1107	30.1633	28.2238	29.1844	28.055	25.9073	24.8414	25.8429	29.8705	29.8716	28.246	26.3056	22.2171	26.017	24.0171	22.6657	22	21.0847	19.7479	20	22.1562	19.9577	22	21	20.1616	20	NA
Cote dIvoire (IvoryCoast)		2	8	10	24	28	28.8	19.9342	17.9851	11.765	1.71135	1.70517	1.81934	1.30009	0.83229	7.32588	8.47313	16.2613	19.5415	20.9168	15.953	12.3647	11.5406	13.0747	19.8516	27.7769	39.9358	63.2967	53.0438	59.9316	58.4799	44.4798	40.2359	38.5622	NA
Djibouti		0	0	0	0	0	0	0	0	0	0	0	0	0	0	0	0	0	0	0	0	0	0	0	0	0	0	0	0	0	0	0	0	0	NA
Egypt		613	616	691	753	848	915	826.499	910.597	872.593	899.236	901.352	906.99	883.163	898.061	903.688	929.495	933.673	869.671	848.135	872.894	793.337	748.06	742.552	744.095	700.092	682.774	682.835	673.672	706.522	728.621	717.356	725.679	720.025	NA
Equatorial Guinea		0	0	0	0	0	0	0	0	0	0	0	0.102	1.55	4.5	5	5	17.093	52.4219	83	102	167.5	181.438	212.562	206.466	368.208	375.477	362.866	368.529	359.203	346.016	322.71	297.37	318	NA
Eritrea		--	--	--	--	--	--	--	--	--	--	--	--	--	--	-0.25778	-0.26316	-0.26515	-0.26588	0	0	0	0	0	0	0	0	0	0	0	0	0	0	0	NA
Ethiopia		0	0	0	0	0	0	-0.25884	-0.252	-0.2564	-0.30897	-0.31635	-0.05196	-0.10383	-0.19707	0	0	0	0	0	0	0	0	0	0	0	0	0	0	0.1	0.1	0.1	0.1	0.1	NA
Gabon		176	152	157	158	158	173	165.914	154.891	158.96	207.83	269.836	293.835	297.478	312.386	328.406	364.8	368.089	370.267	351.892	330.82	314.792	269.802	251.048	241.16	238.771	266.029	236.882	243.897	247.748	241.928	245.508	244.355	241.959	NA
Gambia, The		0	0	0	0	0	0	0	0	0	0	0	0	0	0	0	0	0	0	0	0	0	0	0	0	0	0	0	0	0	0	0	0	0	NA
Ghana		2	2	2	2	2	1	0.23041	0.09429	0.08566	-0.05667	-0.04152	0.22565	1.23409	1.81067	1.43603	4.05854	6.63827	5.16046	4.99377	5.99592	7.13187	7.18333	7.43318	7.47741	8.57353	7.39939	7.08103	7.69119	7.22731	6.88771	8.46391	77.7872	79.6301	NA
Guinea		0	0	0	0	0	0	0	0	0	0	0	0	0	0	0	0	0	0	0	0	0	0	0	0	0	0	0	0	0	0	0	0	0	NA
Guinea-Bissau		0	0	0	0	0	0	0	0	0	0	0	0	0	0	0	0	0	0	0	0	0	0	0	0	0	0	0	0	0	0	0	0	0	NA
Kenya		1	1	1	1	1	1	-0.14971	-0.08071	-0.08313	-0.0287	-0.1002	-0.13099	-0.10723	-0.15289	-0.06341	0.02949	0.00594	-0.05166	0.01098	-0.01533	-0.05479	-0.09184	-0.16557	-0.07992	-0.26325	-0.16089	-0.31759	-0.13615	-0.16178	-0.16742	-0.05809	-0.05809	-0.05809	NA
Lesotho		0	0	0	0	0	0	0	0	0	0	0	0	0	0	0	0	0	0	0	0	0	0	0	0	0	0	0	0	0	0	0	0	0	NA
Liberia		0	0	0	0	0	0	0	0	0	0	0	0	0	0	0	0	0	0	0	0	0	0	0	0	0	0	0	0	0	0	0	0	0	NA
Libya		1827	1175	1190	1135	1124	1085	1061.63	999.011	1201.68	1182.93	1407.2	1520.92	1470.46	1399.54	1416.5	1428.2	1447.31	1504.05	1448.16	1377	1469.35	1427.84	1383.18	1484.89	1582.3	1721.29	1809.58	1844.7	1874.44	1790.11	1789.11	501.466	1483.04	NA
Madagascar		0	0	0	0	0	0	-0.17224	-0.08877	-0.11341	-0.07313	-0.08841	-0.10686	-0.03472	-0.03497	-0.03402	-0.03138	-0.03168	-0.03102	-0.0287	-0.0287	0.06914	0.08415	0.08927	0.09059	0.09218	0.08457	0	0	0	0	0	0	0	NA
Malawi		0	0	0	0	0	0	0	0	0	0	0	0	0	0	0	0	0	0	0	0	0.2	0.2	0.2	0.2	0.2	0.2	0.2	0.2	0.2	0.2	0.2	0.2	0.2	NA
Mali		0	0	0	0	0	0	0	0	0	0	0	0	0	0	0	0	0	0	0	0	0	0	0	0	0	0	0	0	0	0	0	0	0	NA
Mauritania		0	0	0	0	0	0	0	-0.33338	0.16046	0.11011	0.11728	0.1102	-0.04666	-0.10065	-0.06042	-0.097	-0.09532	-0.09554	-0.09848	-0.09848	-0.09266	0	0	0	0	0	30.6192	14.9918	12.8333	11.2452	8.23223	7.73764	6.69749	NA
Mauritius		0	0	0	0	0	0	0	0	0	0	0	0	0	0	0	0	0	0	0	0	0	0	0	0	0	0	0	0	0	0	0	0	0	NA
Morocco		2	2	2	2	2	2	-1.23401	-0.06086	0.15734	-0.01258	-0.73418	-0.83133	-0.84792	-1.37485	-1.46369	-1.17792	3.93057	4.78675	4.47664	3.81373	4.02365	4.03491	4.48438	3.72307	3.44645	4.30974	4.05268	3.93794	4.72237	4.75983	5.05691	5.05691	5.05691	NA
Mozambique		0	0	0	0	0	0	0	0	0	0	0	0	0	0	0	0	0	0	0	0	0	0	0	0	0	0	0	0	0	0.02	0.02	0.02	0.02	NA
Namibia		--	--	--	--	--	--	--	--	--	--	0	0	0	0	0	0	0	0	0	0	0	0	0	0	0	0	0	0	0	0	0	0	0	NA
Niger		0	0	0	0	0	0	0	0	0	0	0	0	0	0	0	0	0	0	0	0	0	0	0	0	0	0	0	0	0	0	0	6.71233	20	NA
Nigeria		2060	1438	1300	1246	1393	1500	1469.91	1344.4	1453.99	1721.64	1816.86	1898.17	1950.61	1966.94	1936.4	1998.08	2006.75	2139.79	2160.04	2136.3	2169.14	2261.42	2123.32	2278.59	2331.7	2630.86	2442.25	2352.76	2168.87	2212.18	2459.4	2554.49	2524.14	NA
Reunion		0	0	0	0	0	0	0	0	0	0	0	0	0	0	0	0	0	0	0	0	0	0	0	0	0	0	0	0	0	0	0	0	0	NA
Rwanda		0	0	0	0	0	0	0	0	0	0	0	0	0	0	0	0	0	0	0	0	0	0	0	0	0	0	0	0	0	0.01	0.01	0.01	0.01	NA
Saint Helena		0	0	0	0	0	0	0	0	0	0	0	0	0	0	0	0	0	0	0	0	0	0	0	0	0	0	0	0	0	0	0	0	0	NA
Sao Tome and Principe		0	0	0	0	0	0	0	0	0	0	0	0	0	0	0	0	0	0	0	0	0	0	0	0	0	0	0	0	0	0	0	0	0	NA
Senegal		0	0	0	0	0	0	0.14657	-0.10113	-0.15271	-0.12559	-0.17568	-0.09497	-0.06304	-0.04557	-0.00703	-0.0103	-0.00877	-0.07428	-0.03745	-0.01158	0.01548	-0.02753	-0.02113	-0.03129	-0.05876	-0.03865	-0.01342	-0.06512	-0.08098	-0.03246	-0.03411	-0.03411	-0.03411	NA
Seychelles		0	0	0	0	0	0	0	0	0	0	0	0	0	0	0	0	0	0	0	0	0	0	0	0	0	0	0	0	0	0	0	0	0	NA
Sierra Leone		0	0	0	0	0	0	-0.01145	-0.05387	-0.03979	-0.03823	-0.03798	-0.03757	-0.00739	-0.03461	0.12848	-0.00365	-0.00364	-0.0039	-0.00264	-0.00264	-0.00204	0	0.00084	0.00399	0.0007	0.00299	0.02898	0.02539	0.03298	0	0	0.02539	0.02539	NA
Somalia		0	0	0	0	0	0	0.19584	0.12925	0.1292	0.13156	0.12321	0.05966	0.05381	0.05374	0.05374	0.05374	0.05374	0.05374	0.05374	0.05374	0	0	0	0	0	0	0	0	0	0	0	0	0	NA
South Africa		0	4	20	55	55	60	67.1316	72.1408	67.2554	77.2731	77.3614	77.4147	140.193	194.521	195.092	206.789	208.18	210.416	213.807	194.83	201.631	209.286	211.444	202.309	234.042	215.211	201.407	196.196	193.713	182.617	180.464	181.041	180.954	NA
Sudan and South Sudan		0	0	0	0	0	0	-0.16724	-0.14726	-0.01788	0.01768	0.01818	-0.27209	0.13407	0.13964	-0.11545	0.04171	1.84694	4.84733	9.84816	68.6173	186.985	210.835	240.493	271.879	344.843	352.407	381.348	466.762	479.831	485.987	514.493	454.878	120.982	NA
Swaziland		0	0	0	0	0	0	0	0	0	0	0	0	0	0	0	0	0	0	0	0	0	0	0	0	0	0	0	0	0	0	0	0	0	NA
Tanzania		0	0	0	0	0	0	0.01662	0.07825	0.03202	-0.22913	-0.16237	-0.13356	-0.00182	-0.16099	-0.15787	-0.1585	-0.15681	-0.15565	-0.15693	-0.1657	0	0	0	0	0	0	0	0	0	0.01	0.01	0.01	0.01	NA
Togo		0	0	0	0	0	0	0	0	0	0	0	0	0	0	0	0	0	0	0	0	0	0	0	0	0	0	0	0	0	0	0	0	0	NA
Tunisia		110	118	120	120	120	114	110.581	108.536	107.667	109.6	97.7073	109.034	114.433	102.132	95.9699	90.0544	87.9777	84.9872	81.2498	83.6961	80.4989	72.581	78.5501	77.3691	81.667	76.7478	78.2408	85.8871	86.7279	91.324	84.4764	70.8188	68.3066	NA
Uganda		0	0	0	0	0	0	0	0	0	0	0	0	0	0	0	0	0	0	0	0	0	0	0	0	0	0	0	0	0	0	0	0	0	NA
Western Sahara		0	0	0	0	0	0	0	0	0	0	0	0	0	0	0	0	0	0	0	0	0	0	0	0	0	0	0	0	0	0	0	0	0	NA
Zambia		0	0	0	0	0	0	0.1403	0.1583	0.46549	0.21139	0.12828	0.16336	0.13192	0.14657	0.14526	0.14603	0.1476	0.14895	0.15435	0.05809	0.00802	0.12579	0.13021	0.14005	0.15	0.15928	0.15948	0.19034	0.14016	0.14156	0.17461	0.17461	0.17461	NA
Zimbabwe		0	0	0	0	0	0	0	0	0	0	0	0	0	0	0	0	0	0	0	0	0	0	0	0	0	0	0	0	0.04	0.06	0.12	0.12	0.12	NA
Afghanistan		0	0	0	0	0	0	0	0	0	0	0	0	0	0	0	0	0	0	0	0	0	0	0	0	0	0	0	0	0	0	0	0	0	NA
American Samoa		0	0	0	0	0	0	0	0	0	0	0	0	0	0	0	0	0	0	0	0	0	0	0	0	0	0	0	0	0	0	0	0	0	NA
Australia		460.24	474.194	443.505	489.469	570.582	664.613	606.181	638.627	632.637	582.721	666.494	635.181	618.748	589.637	624.809	646.646	666.929	694.684	649.26	646.941	828.058	768.257	744.245	629.813	557.344	572.969	554.528	587.449	587.717	592.486	604.106	530.507	519.065	NA
Bangladesh		0	0	0	0.22	0.41	0.735	0.6521	0.61785	0.76379	0.66923	1.00148	0.87309	0.99804	1.1995	1.59105	1.32997	1.4889	2.23274	2.1566	1.9805	3.21103	4.10149	6.82469	6.91283	6.74582	6.75957	6.73288	6.72417	6.4086	5.68375	5.78511	5.78511	5.45178	NA
Bhutan		0	0	0	0	0	0	0	0	0	0	0	0	0	0	0	0	0	0	0	0	0	0	0	0	0	0	0	0	0	0	0	0	0	NA
Brunei		270	188	179	187	175	168	181.205	150.207	148.208	142.224	160.248	171.388	177.515	177.68	180.222	176.227	166.66	175.263	179.679	204.265	215.368	217.584	189.407	196.368	204.431	213.148	220.409	175.512	157.764	154.606	159.405	152.177	140.724	NA
Burma (Myanmar)		30	27	30	30	32	30	24.238	17.2066	13.8646	16.1503	14.1432	16.1094	15.0133	14.1289	14.1995	10.1112	8.41947	9.59767	11.6197	10.1623	12.7403	10.488	15.6024	15.6873	20.6839	20.7507	23.7911	21.9546	22.0602	18.7763	21.156	20.8272	20.8272	NA
Cambodia		0	0	0	0	0	0	0	0	0	0	0	0	0	0	0	0	0	0	0	0	0	0	0	0	0	0	0	0	0	0.6	0.081	0.0005	0.0005	NA
China		2114	2012	2045	2120	2296	2505	2587.51	2680.49	2722.23	2749.24	2768.04	2836.2	2851.94	2903.46	2957.31	3059.62	3211.29	3284.56	3301.74	3317.03	3377.53	3434.63	3534.86	3572.91	3674.75	3809.02	3884.35	3956.04	4036.67	4067.54	4362.66	4346.98	4416.18	NA
Cook Islands		0	0	0	0	0	0	0	0	0	0	0	0	0	0	0	0	0	0	0	0	0	0	0	0	0	0	0	0	0	0	0	0	0	NA
Fiji		0	0	0	0	0	0	0	0	0	0	0	0	0	0	0	0	0	0	0	0	0	0	0	0	0	0	0	0	0	0	0.01	0.03	0.03	NA
French Polynesia		0	0	0	0	0	0	0	0	0	0	0	0	0	0	0	0	0	0	0	0	0	0	0	0	0	0	0	0	0	0	0	0	0	NA
Guam		0	0	0	0	0	0	0	0	0	0	0	0	0	0	0	0	0	0	0	0	0	0	0	0	0	0	0	0	0	0	0	0	0	NA
Hawaiian Trade Zone		0	0	0	0	0	-0.07457	-0.29603	--	--	--	--	--	--	--	--	--	--	--	--	--	--	--	--	--	--	--	--	--	--	--	--	--	--	NA
Hong Kong		0	0	0	0	0	0	0	0	0	0	0	0	0	0	0	0	0	0	0	0	0	0	0	0	0	0	0	0	0	0	0.1	0.1	0.1	NA
India		185.5	329.4	394.5	485	525	626	645.725	626.873	654.515	723.786	681.813	639.267	602.059	577.566	650.635	769.715	750.863	779.616	761.305	764.785	772.951	784.631	815.865	818.333	846.601	824.061	853.306	852.644	874.969	873.594	965.302	995.805	990.178	NA
Indonesia		1659	1712	1431	1448	1498	1380	1425.54	1369.62	1368.83	1480.59	1537.02	1665.96	1576.91	1588.09	1589	1581.58	1638.83	1607.55	1616.04	1568.83	1530.28	1433.58	1340.03	1245.32	1183.38	1149.53	1102.21	1041.53	1065.42	1053.15	1038.71	1015.48	974.255	NA
Japan		39.5	38	44	38.5	46.4	50.55	52.3309	54.9015	59.5345	62.5673	66.5884	77.4767	81.6583	84.5428	81.6512	90.9501	99.9762	101.073	104.448	109.483	112.199	121.059	120.175	116.569	123.392	128.455	131.563	132.444	125.272	137.624	142.472	136.257	135.513	NA
Kiribati		0	0	0	0	0	0	0	0	0	0	0	0	0	0	0	0	0	0	0	0	0	0	0	0	0	0	0	0	0	0	0	0	0	NA
Korea, North		0	0	0	0	0	0	0.61571	0.61571	0.39609	0.48687	0.62053	0.74104	0.86271	0.92199	0.67223	0.61892	0.31373	0.25407	0.79701	0.55277	0.66887	0.14011	0.14138	0.13847	0.14097	0.12071	0.09299	0.11803	0.12329	0.09011	0.0872	0.0872	0.0872	NA
Korea, South		0	0	0	0	-12.7334	-9.0202	-8.14502	-7.43458	-9.56385	-11.7858	-9.82855	-20.743	-23.5888	-23.4762	-23.7454	-22.3424	-15.2285	-0.69445	10.6593	5.51556	14.0113	14.7822	21.9133	14.5888	16.9178	17.2481	28.0154	30.0332	33.6573	54.65	58.4747	59.7895	61.0436	NA
Laos		0	0	0	0	0	0	0	0	0	0	0	0	0	0	0	0	0	0	0	0	0	0	0	0	0	0	0	0	0	0	0	0	0	NA
Macau		0	0	0	0	0	0	0	0	0	0	0	0	0	0	0	0	0	0	0	0	0	0	0	0	0	0	0	0	0	0	0	0	0	NA
Malaysia		284	265	307	366	451	451	513.123	508.205	550.663	597.101	629.57	656.671	666.522	660.386	676.323	717.554	730.026	765.383	823.133	793.173	771.032	751.14	794.917	841.682	861.81	752.774	732.816	704.596	730.632	693.875	683.071	625.976	639.813	NA
Maldives		0	0	0	0	0	0	0	0	0	0	0	0	0	0	0	0	0	0	0	0	0	0	0	0	0	0	0	0	0	0	0	0	0	NA
Mongolia		0	0	0	0	0	0	0	0	0	0	0	0	0	0	0	0	0	0	0.123	0.197	0.179	0.202	0.381	0.501	0.589	0.55	1.032	2.329	3.208	5.123	5.976	6.9833	9.93451	NA
Nauru		0	0	0	0	0	0	0	0	0	0	0	0	0	0	0	0	0	0	0	0	0	0	0	0	0	0	0	0	0	0	0	0	0	NA
Nepal		0	0	0	0	0	0	0	0	0	0	0	0	0	0	0	0	0	0	0	0	0	0	0	0	0	0	0	0	0	0	0	0	0	NA
New Caledonia		0	0	0	0	0	0	0	0	0	0	0	0	0	0	0	0	0	0	0	0	0	0	0	0	0	0	0	0	0	0	0	0	0	NA
New Zealand		9	12	17	18	20	23.8	42.8371	44.1266	52.5436	56.7127	58.7479	58.1054	57.5865	60.4851	57.352	47.9609	46.853	68.1833	57.0628	52.1076	47.6798	43.9419	40.9907	31.8152	27.9397	27.7737	25.669	47.5973	65.2709	61.0268	60.7709	52.174	48.1911	NA
Niue		0	0	0	0	0	0	0	0	0	0	0	0	0	0	0	0	0	0	0	0	0	0	0	0	0	0	0	0	0	0	0	0	0	NA
Pakistan		11.2	11.2	13.2	14.2	18.2	36.2	42.1093	42.0704	45.1443	48.0305	62.0385	63.3411	63.6747	62.5494	57.651	61.9478	57.6238	59.5603	57.8434	56.5718	56.7628	63.3744	67.9307	64.3302	66.5916	68.1262	69.2566	68.6869	62.6039	59.8465	64.8983	63.4109	61.6647	NA
Papua New Guinea		0	0	0	0	0	0	0	0	0	0	0	0.2	53	125.877	110	100.024	103.385	80.025	79.086	96.623	70.0853	67.5234	55.1534	50.4931	45.6014	40.3044	44.6474	42.2044	38.1891	34.9878	30.5138	30.1577	27.4883	NA
Philippines		16	3	9	14	13	10	7.89496	5.54907	5.85065	4.72863	3.82956	2.58945	7.28011	7.7982	6.1846	3.13334	-1.61582	-2.08121	-1.51135	-0.86955	-0.42457	7.83791	10.4327	14.0961	24.307	25.7712	26.2872	25.3893	27.2183	28.8984	38.5935	31.8922	25.2429	NA
Samoa		0	0	0	0	0	0	0	0	0	0	0	0	0	0	0	0	0	0	0	0	0	0	0	0	0	0	0	0	0	0	0	0	0	NA
Singapore		4	4	4	4	4	4	-6.21418	1.05774	-5.696	-6.57233	-6.03659	-1.8867	-4.0466	-0.60021	-3.11353	-1.18541	6.43491	5.43412	3.19044	6.28971	13.0946	14.956	8.29042	9.70066	9.83605	8.57323	9.96656	11.6083	23.5481	20.5791	20.1674	20.1674	20.1674	NA
Solomon Islands		0	0	0	0	0	0	0	0	0	0	0	0	0	0	0	0	0	0	0	0	0	0	0	0	0	0	0	0	0	0	0	0	0	NA
Sri Lanka		0	0	0	0	0	0	-0.34963	-0.41903	-0.40054	-0.32023	-0.30303	-0.42392	-0.36891	-0.27835	-0.38705	-0.35217	-0.56406	-0.52205	-0.40593	-0.36756	-0.44087	-0.47399	-0.5264	-0.55094	-0.50835	-0.55377	-0.42425	-0.63651	-0.60441	-0.61835	-0.54346	-0.54346	-0.54346	NA
Taiwan		9	10	8	8	8	6	-2.20352	0.07149	-2.74946	-5.29971	-5.35028	-6.09741	-4.56903	-4.69727	-4.33106	-6.99617	-6.33711	-7.0481	-7.10035	-7.68378	-6.37495	3.6058	8.36396	7.89501	10.5974	15.9606	21.1024	26.7768	16.6584	29.0156	21.2866	22.2866	22.2866	NA
Thailand		1.3	2.3	12	18	30	53	52.2787	48.6333	53.0763	51.1579	57.8128	60.7748	66.6133	69.7004	80.9916	91.5126	100.113	132.838	147.144	158.094	181.853	191.792	206.422	261.065	258.61	309.53	340.244	373.43	406.952	428.679	430.258	416.79	433.288	NA
Timor-Leste (East Timor)		--	--	--	--	--	--	--	--	--	--	--	--	--	--	--	--	--	--	--	--	--	--	--	0	51.9098	94.4247	100.901	78.4833	100.008	96.266	87.4986	83.7425	79.4945	NA
Tonga		0	0	0	0	0	0	0	0	0	0	0	0	0	0	0	0	0	0	0	0	0	0	0	0	0	0	0	0	0	0	0	0	0	NA
U.S. Pacific Islands		0	0	0	0	0	0	0	0	0	0	0	0	0	0	0	0	0	0	0	0	0	0	0	0	0	0	0	0	0	0	0	0	0	NA
Vanuatu		0	0	0	0	0	0	0	0	0	0	0	0	0	0	0	0	0	0	0	0	0	0	0	0	0	0	0	0	0	0	0	0	0	NA
Vietnam		0	0	0	0	0	0	0.8	5	15.0008	32.0093	50.0012	80.0012	106.231	120.001	140.508	173.303	175.452	191.262	245.746	289.8	316	356.799	339.595	352.507	403.287	394.333	363.437	333.663	309.647	339.761	332.251	323.596	363.536	NA
Wake Island		0	0	0	0	0	0	0	0	0	0	0	0	0	0	0	0	0	0	0	0	0	0	0	0	0	0	0	0	0	0	0	0	0	NA
