# Supplementary material
Source: MDPI journal article supplement (https://www.mdpi.com/1099-4300/15/12/5565)
Supplement: s2 [file s2 › Sources/Raw Data/Total_Petroleum_Consumption_(Quadrillion_Btu).xls]

## Sheet: Data3
Table: Total Petroleum Consumption (Quadrillion Btu)
		1980	1981	1982	1983	1984	1985	1986	1987	1988	1989	1990	1991	1992	1993	1994	1995	1996	1997	1998	1999	2000	2001	2002	2003	2004	2005	2006	2007	2008	2009	2010	2011	2012
North America		40.7837	38.4162	36.4476	35.7302	36.9291	36.9303	38.2976	39.2223	40.779	41.1382	40.1882	39.6075	40.4199	40.6857	41.7805	41.4872	42.9208	43.7234	44.603	45.7931	46.6218	46.2982	46.2473	47.0889	49.1406	49.1792	48.5202	49.2207	45.916	43.6551	44.4195	44.1012	43.4259
Bermuda		0.00793	0.00686	0.00727	0.00771	0.00752	0.00741	0.007	0.00988	0.0108	0.01315	0.00928	0.00805	0.00647	0.00695	0.00743	0.00739	0.0075	0.00752	0.00752	0.00752	0.0075	0.00744	0.00752	0.00814	0.00869	0.00927	0.00922	0.01018	0.00853	0.00971	0.00955	0.00848	0.0088
Canada		3.97326	3.64019	3.23997	2.96623	3.07572	3.06232	3.07713	3.21504	3.36711	3.51543	3.46682	3.32502	3.41861	3.45217	3.50167	3.58371	3.70406	3.86854	3.87597	4.0142	4.27218	4.07997	4.12115	4.37536	4.84081	4.61574	4.41555	4.83045	4.39832	4.22249	4.37894	4.49056	4.56514
Greenland		0.00786	0.0074	0.00719	0.00503	0.00797	0.00714	0.00462	0.00335	0.00777	0.00671	0.00787	0.00779	0.00687	0.00708	0.00719	0.00719	0.00728	0.00746	0.00756	0.00756	0.00772	0.00796	0.00805	0.00809	0.00813	0.00829	0.00846	0.00826	0.00921	0.00893	0.00893	0.00842	0.00827
Mexico		2.58791	2.82739	2.95894	2.69686	2.78251	2.92678	3.00818	3.12727	3.16737	3.38991	3.14907	3.41718	3.45979	3.47325	3.70182	3.44929	3.52536	3.68019	3.89507	3.92512	4.0716	4.01636	3.8855	3.8848	3.99001	4.15661	4.13041	4.59666	4.21878	4.00943	4.01131	4.12695	4.15392
Saint Pierre and Miquelon		0.0022	0.00221	0.00203	0.00221	0.00216	0.00191	0.0024	0.00306	0.00319	0.00365	0.00359	0.00341	0.00318	0.00174	0.00183	0.00122	0.00121	0.00083	0.00096	0.00096	0.00105	0.00096	0.00096	0.00105	0.00113	0.00117	0.00118	0.00122	0.00124	0.00122	0.00122	0.00126	0.00207
United States		34.2045	31.9322	30.2322	30.0522	31.0532	30.9247	32.1983	32.8637	34.2228	34.2093	33.5516	32.846	33.525	33.7445	34.5605	34.4384	35.6754	36.1589	36.8159	37.8377	38.2617	38.1855	38.2242	38.8114	40.2918	40.3881	39.9554	39.774	37.2799	35.4033	36.0095	35.4655	34.6877
Central & South America		7.55969	7.38011	7.07693	6.65921	6.76909	6.65256	7.14601	7.35036	7.41796	7.44583	7.76085	7.8852	8.07876	6.19988	8.72913	9.16422	9.57857	10.0489	10.3992	10.6329	10.6352	10.8948	10.7554	10.6741	11.0162	11.305	11.7572	11.9937	12.7405	12.4201	12.9349	13.2846	13.6716
Antarctica		0.00213	0.00213	0.00212	0.00213	0.0027	0.00304	0.00275	0.00283	0.00291	0.00288	0.00292	0.00305	0.00304	0.00304	0.00305	0.00314	0.00313	0.00314	0.00314	0.00314	0.00313	0.00318	0.00318	0.00327	0.00325	0.00348	0.00348	0.00335	0.00383	0.00335	0.00102	0.00193	0.00135
Antigua and Barbuda		0.00598	0.00531	0.00711	0.00415	0.0047	0.00461	0.00462	0.00564	0.0058	0.00582	0.00608	0.006	0.00598	0.00588	0.00661	0.00679	0.00677	0.00705	0.00705	0.00705	0.00725	0.00727	0.00732	0.00776	0.00836	0.00909	0.00927	0.00891	0.00692	0.00943	0.00941	0.00827	0.00827
Argentina		1.03056	0.99214	0.95864	0.97476	0.96496	0.84705	0.94684	0.99506	0.97528	0.88855	0.84405	0.86275	0.902	0.73337	0.92531	0.91106	0.96924	0.97887	1.02748	1.06186	1.04164	0.96855	0.88247	0.91585	0.94369	1.00124	1.0738	1.17782	1.23437	1.19013	1.25639	1.37335	1.41539
Aruba		--	--	--	--	--	--	0.00146	0.00146	0.00556	0.00747	0.00787	0.00858	0.00921	0.0089	0.0104	0.01201	0.0079	0.01264	0.01277	0.01277	0.01349	0.01353	0.01353	0.01442	0.01452	0.01487	0.01597	0.01461	0.0141	0.01419	0.01419	0.01266	0.01238
Bahamas, The		0.0599	0.06258	0.05372	0.04065	0.03669	0.03321	0.03275	0.03622	0.0338	0.03847	0.04116	0.0365	0.03061	0.02965	0.03625	0.04254	0.04778	0.04751	0.0536	0.04834	0.04749	0.0466	0.0469	0.0566	0.0572	0.0658	0.06591	0.06274	0.04299	0.04867	0.04867	0.04903	0.05162
Barbados		0.0141	0.01493	0.01491	0.01571	0.01513	0.01673	0.01784	0.01694	0.01548	0.01668	0.01735	0.01773	0.01797	0.01665	0.01718	0.01747	0.01533	0.01926	0.0199	0.02042	0.0227	0.02185	0.02185	0.02227	0.01492	0.02052	0.01953	0.01762	0.01637	0.0198	0.01856	0.01903	0.01725
Belize		0.0033	0.00302	0.00283	0.00283	0.0031	0.0031	0.00379	0.00306	0.00221	0.0032	0.00453	0.00506	0.00433	0.00401	0.00408	0.00469	0.00392	0.0064	0.0064	0.00649	0.00938	0.01241	0.01184	0.01241	0.01329	0.01402	0.01421	0.0146	0.00754	0.00692	0.00692	0.00693	0.0099
Bolivia		0.04986	0.05158	0.04897	0.04798	0.04649	0.04358	0.04217	0.04126	0.04485	0.04782	0.04934	0.05039	0.05166	0.03983	0.05902	0.06472	0.06705	0.06959	0.07771	0.08924	0.09489	0.09217	0.09659	0.09496	0.10126	0.10235	0.11559	0.11724	0.13069	0.10249	0.10957	0.1149	0.12574
Brazil		2.39586	2.2419	2.17858	2.00237	2.12288	2.20968	2.53166	2.58085	2.6462	2.68286	3.01918	3.05255	3.11839	1.93374	3.44778	3.67861	3.91461	4.17348	4.30391	4.37281	4.39356	4.4907	4.38243	4.21967	4.34496	4.50499	4.68316	4.81742	4.67673	5.08676	5.37299	5.43082	5.65501
Cayman Islands		0.00144	0.00155	0.00155	0.00151	0.00155	0.00159	0.0016	0.00163	0.00382	0.00388	0.00396	0.00422	0.0043	0.00386	0.00445	0.00483	0.00486	0.00487	0.00496	0.00496	0.0049	0.00496	0.00496	0.00514	0.00551	0.00578	0.00657	0.00757	0.00953	0.00774	0.00778	0.00767	0.00675
Chile		0.21675	0.20852	0.20408	0.19271	0.19302	0.19195	0.19434	0.20686	0.22288	0.25425	0.27142	0.29247	0.30365	0.29433	0.36186	0.40077	0.44098	0.46529	0.48624	0.49563	0.47564	0.46877	0.47262	0.47986	0.49829	0.52948	0.55832	0.50737	0.76728	0.68278	0.6555	0.67782	0.70714
Colombia		0.32364	0.32921	0.33787	0.34182	0.34704	0.34348	0.34081	0.36813	0.39709	0.41504	0.39144	0.40622	0.45631	0.41421	0.48388	0.50289	0.55236	0.56872	0.57773	0.55442	0.55478	0.54417	0.52327	0.53299	0.53529	0.54351	0.55362	0.5668	0.55108	0.52154	0.5435	0.57307	0.58356
Costa Rica		0.03363	0.03354	0.03144	0.03345	0.02948	0.0308	0.02802	0.03289	0.03796	0.04096	0.03897	0.0414	0.05159	0.0523	0.05781	0.06507	0.06172	0.06386	0.07154	0.07262	0.07335	0.07629	0.07977	0.08497	0.08395	0.08202	0.09267	0.0988	0.10529	0.09602	0.098	0.09665	0.10637
Cuba		0.44088	0.44913	0.48578	0.4438	0.45975	0.46896	0.48369	0.47485	0.48107	0.48923	0.47826	0.44407	0.39119	0.35715	0.39756	0.40691	0.41554	0.43351	0.42491	0.42729	0.42595	0.44379	0.4423	0.44054	0.49634	0.43018	0.33487	0.34362	0.29995	0.36414	0.35411	0.39744	0.36915
Dominica		0.00038	0.00051	0.00051	0.00051	0.00051	0.00058	0.00058	0.00063	0.0008	0.00084	0.00084	0.00084	0.00084	0.00084	0.00102	0.00115	0.00115	0.00115	0.0012	0.0012	0.00116	0.00147	0.0016	0.00174	0.00154	0.00133	0.00168	0.00172	0.00193	0.00184	0.00184	0.00201	0.00189
Dominican Republic		0.08055	0.07718	0.08253	0.09945	0.08695	0.08948	0.09847	0.10951	0.12196	0.12066	0.13389	0.1296	0.13549	0.11038	0.13896	0.15032	0.16055	0.17212	0.17648	0.20038	0.22369	0.23181	0.23726	0.23522	0.23025	0.23132	0.23354	0.23726	0.25942	0.2238	0.22367	0.23774	0.24298
Ecuador		0.17345	0.18231	0.19908	0.17534	0.16968	0.17611	0.18853	0.18454	0.18968	0.18276	0.19726	0.21144	0.24268	0.19045	0.24298	0.24994	0.26195	0.2722	0.27986	0.25855	0.26128	0.28113	0.28458	0.29284	0.30527	0.32067	0.35026	0.36009	0.46623	0.42209	0.45672	0.4357	0.42896
El Salvador		0.02922	0.02539	0.02416	0.02685	0.02719	0.02846	0.0311	0.03049	0.03325	0.03249	0.03429	0.03972	0.04573	0.04076	0.05171	0.06476	0.06216	0.06663	0.07812	0.0787	0.07803	0.08089	0.08085	0.08656	0.08533	0.08825	0.08954	0.09066	0.08887	0.08625	0.08637	0.08999	0.09035
Falkland Islands (Islas Malvinas)		0.00017	0.00017	0.00017	0.00017	0.00017	0.00022	0.00022	0.00022	0.00043	0.00039	0.00035	0.00035	0.00035	0.00035	0.00035	0.00039	0.00044	0.00048	0.00039	0.00039	0.00039	0.00039	0.00044	0.00044	0.00048	0.00052	0.00057	0.00065	0.00066	0.00065	0.00065	0.00063	0.00063
French Guiana		0.00515	0.00443	0.00565	0.00581	0.00463	0.00465	0.00542	0.00598	0.00706	0.00796	0.00951	0.01075	0.00861	0.01128	0.01169	0.01332	0.01329	0.01332	0.01355	0.01355	0.01369	0.01373	0.0141	0.01472	0.01425	0.01484	0.01498	0.01442	0.01317	0.01146	0.01365	0.01472	0.01426
Grenada		0.00067	0.00077	0.00085	0.00083	0.00085	0.00088	0.00098	0.00102	0.00111	0.00115	0.00178	0.00178	0.00183	0.00181	0.00237	0.00221	0.00244	0.00308	0.00278	0.00278	0.00181	0.00318	0.00345	0.00349	0.00352	0.00361	0.00381	0.00377	0.00419	0.00398	0.00397	0.00396	0.00626
Guadeloupe		0.00707	0.0101	0.01275	0.01339	0.01483	0.01341	0.01347	0.01536	0.01681	0.01884	0.02032	0.02128	0.01974	0.02111	0.02366	0.02428	0.02404	0.02445	0.02445	0.02445	0.02581	0.02628	0.02672	0.02777	0.02835	0.02976	0.03126	0.03483	0.03599	0.03042	0.03042	0.03109	0.03307
Guatemala		0.06067	0.05249	0.05229	0.05392	0.04719	0.05296	0.04689	0.04715	0.05158	0.05238	0.05511	0.05253	0.06282	0.06094	0.07829	0.08508	0.0895	0.0991	0.11976	0.1217	0.12093	0.13481	0.13204	0.13279	0.1378	0.14329	0.14335	0.15013	0.14133	0.15527	0.1427	0.16117	0.16236
Guyana		0.02137	0.02429	0.0195	0.01721	0.01968	0.02	0.01927	0.01465	0.01456	0.00972	0.00936	0.0108	0.01227	0.01513	0.01545	0.01318	0.0141	0.01547	0.01964	0.0209	0.0229	0.02354	0.02393	0.02341	0.02101	0.02313	0.022	0.02186	0.02265	0.02256	0.02244	0.02297	0.02272
Haiti		0.01262	0.00844	0.01053	0.00838	0.00842	0.00998	0.01066	0.01732	0.01883	0.01753	0.00996	0.00986	0.01127	0.00819	0.00761	0.01306	0.01544	0.01983	0.01852	0.02071	0.02122	0.02312	0.0239	0.02381	0.02428	0.02457	0.02519	0.02757	0.03519	0.03139	0.02926	0.02903	0.0291
Honduras		0.02516	0.02226	0.02267	0.02417	0.02479	0.02317	0.02429	0.02451	0.02748	0.03352	0.03777	0.03704	0.03805	0.03663	0.04225	0.04794	0.05301	0.05307	0.06068	0.06399	0.05867	0.06914	0.07641	0.07692	0.08893	0.09327	0.0976	0.1079	0.10329	0.09235	0.0973	0.10072	0.13521
Jamaica		0.11624	0.09773	0.08462	0.09024	0.07405	0.0664	0.06652	0.07147	0.08281	0.09396	0.09982	0.10334	0.11176	0.10886	0.11794	0.13063	0.13313	0.14109	0.14435	0.14815	0.1428	0.14414	0.14702	0.15269	0.15396	0.14867	0.16807	0.17696	0.17045	0.12416	0.12297	0.12807	0.16819
Martinique		0.00934	0.00919	0.00917	0.00906	0.00813	0.00979	0.01053	0.01194	0.01429	0.02028	0.02189	0.01806	0.02012	0.02504	0.02706	0.02766	0.02769	0.02772	0.02777	0.02777	0.02815	0.02841	0.02879	0.03002	0.03085	0.03264	0.03257	0.0338	0.03041	0.03603	0.03608	0.03845	0.03908
Montserrat		0.00026	0.00028	0.00028	0.00028	0.00028	0.00031	0.00031	0.00035	0.0004	0.0004	0.00053	0.00049	0.00057	0.00057	0.00057	0.00066	0.00062	0.00066	0.00071	0.00071	0.00075	0.00075	0.00075	0.00084	0.00092	0.00097	0.00106	0.00115	0.00121	0.00115	0.00115	0.00122	0.00122
Netherlands Antilles		0.23781	0.22241	0.21486	0.19761	0.18614	0.15532	0.1517	0.15405	0.14343	0.15139	0.14774	0.14015	0.13817	0.11234	0.14497	0.15282	0.15243	0.16181	0.16155	0.15593	0.15562	0.15753	0.15079	0.14447	0.14518	0.15288	0.16006	0.16834	0.18474	0.17282	0.16378	0.16203	0.15789
Nicaragua		0.02719	0.02808	0.02827	0.02694	0.02567	0.02923	0.02928	0.02921	0.02994	0.02948	0.02816	0.02684	0.0322	0.02877	0.03446	0.03751	0.03959	0.04161	0.04764	0.05102	0.05116	0.05454	0.05396	0.05433	0.05733	0.06027	0.05973	0.06181	0.05943	0.05942	0.05906	0.06284	0.06915
Panama		0.17304	0.17082	0.16306	0.1675	0.16528	0.1438	0.14794	0.15484	0.15048	0.14706	0.15605	0.156	0.1599	0.15025	0.17773	0.18907	0.15953	0.16799	0.18477	0.1716	0.16945	0.17627	0.1673	0.16859	0.1896	0.18324	0.188	0.19326	0.11033	0.21037	0.23259	0.22704	0.2142
Paraguay		0.02044	0.01892	0.01844	0.01945	0.02119	0.02138	0.0222	0.02818	0.0264	0.03388	0.0324	0.02987	0.0336	0.03187	0.0416	0.04696	0.03878	0.04254	0.0486	0.05477	0.05108	0.04934	0.05142	0.05337	0.05339	0.05267	0.05288	0.05353	0.05963	0.05862	0.06334	0.0568	0.05501
Peru		0.28145	0.28741	0.28371	0.2593	0.26641	0.26132	0.28377	0.28963	0.29576	0.25272	0.25231	0.23411	0.24784	0.23005	0.27541	0.29753	0.31964	0.32679	0.33104	0.33457	0.32717	0.32055	0.31644	0.31909	0.33873	0.32778	0.372	0.33362	0.3956	0.37791	0.38293	0.36212	0.34164
Puerto Rico		0.42549	0.44884	0.32998	0.31502	0.35528	0.3063	0.32878	0.34028	0.30792	0.30157	0.29308	0.36671	0.32709	0.3025	0.34996	0.35755	0.3683	0.37884	0.38803	0.32173	0.4221	0.44972	0.44589	0.45608	0.47056	0.45332	0.44787	0.35918	0.37174	0.32615	0.37126	0.32063	0.32199
Saint Kitts and Nevis		0.00075	0.00079	0.00091	0.00074	0.00075	0.00075	0.00075	0.00079	0.00092	0.00092	0.00092	0.00106	0.00105	0.00118	0.00141	0.00128	0.00145	0.00145	0.00145	0.00145	0.00145	0.00145	0.00145	0.00163	0.00179	0.00189	0.00249	0.00354	0.0036	0.00372	0.00372	0.00375	0.00344
Saint Lucia		0.00164	0.0013	0.00155	0.00143	0.00143	0.00176	0.00177	0.00198	0.00242	0.00243	0.00243	0.00243	0.00251	0.00229	0.00278	0.00283	0.00282	0.00296	0.00296	0.00296	0.00471	0.00494	0.00504	0.00552	0.00533	0.00532	0.00548	0.00577	0.00632	0.00587	0.00587	0.00604	0.00599
Saint Vincent/Grenadines		0.00055	0.00051	0.00055	0.00055	0.00051	0.00057	0.00058	0.00062	0.00076	0.00111	0.00116	0.00111	0.0012	0.00101	0.00178	0.00187	0.00187	0.00199	0.00239	0.00239	0.00243	0.00248	0.00261	0.00275	0.00291	0.00291	0.00287	0.00292	0.00313	0.00291	0.00291	0.00296	0.00397
Suriname		0.03138	0.02698	0.02386	0.01716	0.01453	0.01838	0.01815	0.0157	0.01723	0.01879	0.02236	0.02069	0.01962	0.01918	0.02024	0.02075	0.02032	0.02092	0.02112	0.02112	0.02203	0.02325	0.02446	0.02505	0.02599	0.02675	0.02753	0.02719	0.02711	0.02795	0.02741	0.02974	0.03084
Trinidad and Tobago		0.08922	0.08228	0.06103	0.05203	0.05001	0.04817	0.04672	0.04149	0.03655	0.04253	0.04098	0.04277	0.04469	0.03609	0.05008	0.04495	0.04243	0.04571	0.0441	0.04635	0.0502	0.05843	0.05761	0.06529	0.06757	0.07262	0.07577	0.07661	0.08785	0.07642	0.07544	0.08212	0.08969
Turks and Caicos Islands		0	0	0	0	0	0	0	0	0	0	0	0	0	0	0	0.00019	0.00019	0.00019	0.00021	0.00021	0.00039	0.00023	0.00018	0.00018	0.00017	0.00018	0.00017	0.001	0.00221	0.00226	0.00226	0.00213	0.00211
Uruguay		0.08576	0.07711	0.07304	0.05765	0.05464	0.05089	0.04915	0.05686	0.0705	0.06835	0.0657	0.06201	0.06662	0.06262	0.06711	0.0645	0.0698	0.07643	0.09202	0.10108	0.0901	0.0698	0.0772	0.07662	0.081	0.08429	0.09885	0.09476	0.12624	0.12495	0.11658	0.11468	0.10433
Venezuela		0.81449	0.87913	0.86222	0.79955	0.77827	0.77043	0.81549	0.81596	0.79693	0.77981	0.7938	0.80666	0.82576	0.6141	0.8687	0.88472	0.87611	0.89765	0.90585	0.90617	0.98505	1.07648	1.1386	1.08159	1.09324	1.16647	1.2608	1.37341	1.82942	1.34857	1.43221	1.50562	1.51658
Virgin Islands, U.S.		0.24982	0.22395	0.16259	0.1143	0.13365	0.1496	0.09966	0.11733	0.08209	0.12507	0.11384	0.1152	0.11539	0.07763	0.11498	0.11489	0.11382	0.11657	0.12104	0.29979	0.13205	0.19195	0.19075	0.22458	0.23458	0.22889	0.23891	0.21603	0.2298	0.2232	0.22814	0.27736	0.30636
Virgin Islands, British		0.00032	0.00051	0.00051	0.00051	0.00047	0.00048	0.00053	0.00062	0.00066	0.0007	0.0007	0.0007	0.00075	0.00075	0.00075	0.00075	0.00084	0.00084	0.00084	0.00084	0.00084	0.00084	0.00084	0.00097	0.00123	0.00132	0.00141	0.00153	0.00166	0.00157	0.00157	0.00163	0.00222
Europe		33.956	31.0979	30.0046	29.1251	28.9172	28.7347	29.5681	29.7781	30.2225	30.2154	30.477	30.6358	31.1832	30.6494	31.085	31.8066	32.6154	32.7642	33.3876	33.0877	33.2351	33.4184	33.4884	33.7425	34.3504	34.0042	34.0558	34.3777	33.4067	31.696	31.5047	30.9204	29.5756
Albania		0.09846	0.09377	0.0916	0.0931	0.09209	0.08877	0.08203	0.07291	0.06889	0.05827	0.04319	0.03858	0.04407	0.02184	0.02797	0.03124	0.0247	0.02577	0.03096	0.03804	0.04429	0.04739	0.05049	0.05697	0.0596	0.0646	0.06547	0.06511	0.06362	0.05646	0.05246	0.05679	0.05642
Austria		0.49389	0.47551	0.44082	0.43447	0.42507	0.41456	0.4317	0.43745	0.42747	0.42624	0.4523	0.48655	0.47695	0.48927	0.48488	0.48489	0.53203	0.53187	0.55671	0.5287	0.5316	0.56494	0.57885	0.61099	0.62658	0.63308	0.63216	0.61978	0.59208	0.56644	0.5799	0.5485	0.53591
Belgium		1.11557	1.02073	0.94555	0.8607	0.8125	0.85179	0.95946	0.96332	0.99512	0.97439	0.97805	1.05019	1.07554	1.0554	1.16613	1.15902	1.25595	1.29118	1.31584	1.25405	1.28616	1.2895	1.31202	1.39676	1.40782	1.41247	1.3502	1.35474	1.53559	1.34018	1.32244	1.36876	1.34598
Bosnia and Herzegovina		--	--	--	--	--	--	--	--	--	--	--	--	0.07414	0.04034	0.04139	0.0402	0.03878	0.03893	0.04377	0.04508	0.04024	0.04035	0.04211	0.04554	0.05194	0.05419	0.05357	0.05457	0.05781	0.05764	0.05855	0.05736	0.0595
Bulgaria		0.66442	0.637	0.63925	0.63801	0.6384	0.63144	0.62182	0.5986	0.6021	0.50566	0.41369	0.26036	0.27724	0.21176	0.27005	0.27742	0.24897	0.22598	0.218	0.20482	0.21068	0.2114	0.21696	0.2089	0.21397	0.23407	0.23658	0.23282	0.2226	0.20709	0.20897	0.21277	0.23302
Croatia		--	--	--	--	--	--	--	--	--	--	--	--	0.13849	0.11894	0.16667	0.18889	0.16638	0.17126	0.19153	0.19436	0.17985	0.18141	0.19	0.19431	0.20106	0.20162	0.21468	0.20444	0.20207	0.18842	0.16961	0.18852	0.19151
Cyprus		0.04202	0.03622	0.03868	0.04296	0.04306	0.04536	0.04746	0.05139	0.0525	0.06405	0.06761	0.068	0.08085	0.07197	0.09211	0.092	0.09026	0.09172	0.09919	0.10449	0.10187	0.11083	0.10929	0.11021	0.11615	0.11849	0.12484	0.12528	0.12788	0.12392	0.11961	0.12393	0.1283
Czech Republic		--	--	--	--	--	--	--	--	--	--	--	--	--	0.3248	0.33297	0.34885	0.35972	0.34927	0.36215	0.3588	0.36023	0.37816	0.37233	0.39682	0.43678	0.4505	0.43544	0.44689	0.43647	0.4232	0.40352	0.41021	0.41038
Denmark		0.61929	0.51642	0.48611	0.46082	0.4574	0.47109	0.46454	0.44948	0.42934	0.41116	0.40227	0.40632	0.40263	0.41695	0.44318	0.46751	0.49405	0.4745	0.46551	0.45879	0.43908	0.44527	0.41078	0.39216	0.38615	0.38156	0.39757	0.40325	0.37825	0.34597	0.34853	0.33339	0.32987
Faroe Islands		0.00612	NA	NA	NA	0	0	0.00713	0.0075	0.00784	0.00856	0.00918	0.00843	0.00841	0.00817	0.00855	0.00899	0.00921	0.00925	0.0093	0.0093	0.00945	0.00944	0.00951	0.0096	0.00967	0.00978	0.01058	0.01012	0.01031	0.01029	0.01011	0.01085	0.01058
Finland		0.58248	0.51593	0.47162	0.44216	0.45559	0.433	0.47153	0.48671	0.48536	0.47886	0.47193	0.47413	0.47356	0.4444	0.46064	0.42428	0.42559	0.42547	0.43862	0.44137	0.4226	0.41897	0.44085	0.46426	0.46507	0.45586	0.46179	0.48081	0.45285	0.42527	0.45022	0.42416	0.40029
Former Czechoslovakia		0.77453	0.759	0.70679	0.68789	0.65056	0.64228	0.6347	0.63659	0.6041	0.66244	0.61844	0.51309	0.51063	--	--	--	--	--	--	--	--	--	--	--	--	--	--	--	--	--	--	--	--
Former Serbia and Montenegro		--	--	--	--	--	--	--	--	--	--	--	--	0.11951	0.04964	0.0698	0.05831	0.10529	0.14239	0.13277	0.12091	0.13111	0.17078	0.17468	0.1769	0.17521	0.17717	--	--	--	--	--	--	--
Former Yugoslavia		0.64593	0.60317	0.60413	0.56783	0.68664	0.70029	0.64691	0.66523	0.67163	0.66183	0.67678	0.53405	--	--	--	--	--	--	--	--	--	--	--	--	--	--	--	--	--	--	--	--	--
France		4.72075	4.1926	3.90627	3.78784	3.65466	3.5995	3.61882	3.65765	3.69618	3.7776	3.74807	3.98932	4.10266	3.85777	3.83077	3.95894	4.13448	4.06314	4.22017	4.18869	4.24181	4.23878	4.09147	4.13523	4.26248	4.12036	4.11587	4.18712	4.03012	3.86398	3.82679	3.68343	3.57426
Germany		--	--	--	--	--	--	--	--	--	--	--	5.83028	5.8705	5.99204	5.93679	5.93629	6.0355	6.00835	6.02476	5.84603	5.86921	5.93929	5.73396	5.63234	5.62027	5.47299	5.57122	5.112	5.27581	5.06507	5.15551	4.95962	4.83105
Germany, East		0.80496	0.75664	0.7908	0.7141	0.59451	0.65526	0.61392	0.62531	0.62937	0.62638	0.61913	--	--	--	--	--	--	--	--	--	--	--	--	--	--	--	--	--	--	--	--	--	--
Germany, West		5.67394	5.11355	4.93621	4.82655	4.7202	4.8422	5.18146	5.00599	5.01325	4.68946	4.90424	--	--	--	--	--	--	--	--	--	--	--	--	--	--	--	--	--	--	--	--	--	--
Gibraltar		0.00738	0.00827	0.00736	0.00581	0.0054	0.01246	0.01868	0.01898	0.02451	0.02105	0.02185	0.02253	0.03988	0.04069	0.04172	0.04181	0.04186	0.04181	0.04825	0.04203	0.09355	0.05126	0.05216	0.0535	0.05489	0.05644	0.05775	0.05952	0.05728	0.06265	0.06368	0.06089	0.05055
Greece		0.56432	0.54093	0.50842	0.4917	0.49305	0.51212	0.52101	0.56585	0.59229	0.63057	0.66439	0.66757	0.68366	0.70275	0.71751	0.74911	0.77679	0.7866	0.82498	0.80515	0.84276	0.85367	0.85857	0.9011	0.88436	0.89673	0.9395	0.95179	0.90308	0.84427	0.77219	0.71924	0.65603
Hungary		0.51592	0.49732	0.46853	0.46845	0.42158	0.43281	0.4086	0.41659	0.3796	0.37933	0.36785	0.34106	0.34362	0.33685	0.33946	0.32365	0.30218	0.31014	0.32417	0.30931	0.29646	0.28472	0.28719	0.27645	0.27803	0.31487	0.33275	0.34043	0.32495	0.31972	0.29845	0.28744	0.26219
Iceland		0.02348	0.02129	0.02111	0.02129	0.02333	0.02309	0.02309	0.02509	0.02517	0.02718	0.02928	0.02714	0.02944	0.0315	0.03149	0.03147	0.03571	0.0357	0.0377	0.03759	0.03815	0.03654	0.03774	0.03825	0.03977	0.04035	0.04183	0.04498	0.04183	0.03726	0.03649	0.04341	0.043
Ireland		0.25355	0.21866	0.19124	0.17216	0.17754	0.17482	0.20841	0.18585	0.16549	0.17097	0.19091	0.20626	0.2111	0.21673	0.2383	0.24422	0.25523	0.28019	0.31419	0.35253	0.35616	0.38126	0.37367	0.36713	0.37882	0.39845	0.41985	0.41048	0.39655	0.33596	0.32994	0.29955	0.27071
Italy		4.11569	3.99298	3.79702	3.72486	3.64483	3.59795	3.65472	3.82319	3.86041	3.9951	3.92963	3.89437	3.98368	3.95586	3.90804	4.06024	4.01868	4.03719	4.05297	3.92504	3.85978	3.80111	3.8922	3.8703	3.87976	3.63792	3.62091	3.65714	3.46312	3.18603	3.1459	2.99218	2.69679
Luxembourg		0.04292	0.04492	0.04492	0.04262	0.04298	0.04501	0.04936	0.05594	0.05616	0.06224	0.06835	0.08079	0.08294	0.08278	0.08252	0.07596	0.07819	0.08188	0.08587	0.0921	0.09773	0.10387	0.10654	0.11507	0.12705	0.1369	0.12998	0.12861	0.12732	0.11876	0.12611	0.12795	0.12332
Macedonia		--	--	--	--	--	--	--	--	--	--	--	--	0.04091	0.03916	0.03825	0.03904	0.04921	0.0446	0.04743	0.04198	0.04674	0.03905	0.04251	0.0416	0.04107	0.0415	0.04101	0.0423	0.03971	0.03961	0.03832	0.03918	0.03523
Malta		0.01885	0.02054	0.02148	0.01449	0.01998	0.01272	0.01714	0.01879	0.02006	0.02096	0.02255	0.0246	0.02667	0.0276	0.03091	0.03278	0.03497	0.03735	0.03905	0.04454	0.03919	0.0329	0.03939	0.03925	0.03973	0.04122	0.03904	0.04138	0.0776	0.08782	0.10436	0.10018	0.08745
Montenegro		--	--	--	--	--	--	--	--	--	--	--	--	--	--	--	--	--	--	--	--	--	--	--	--	--	--	0.00615	0.00694	0.00778	0.00829	0.00562	0.00766	0.00909
Netherlands		1.66696	1.51454	1.33092	1.25967	1.20222	1.2435	1.38537	1.41585	1.50298	1.48156	1.5156	1.56797	1.59881	1.58919	1.5939	1.59837	1.59419	1.65209	1.66939	1.72758	1.78943	1.87472	1.88117	1.94342	2.01074	2.16078	2.11361	2.35094	2.1598	2.04718	2.05461	2.05633	2.03247
Norway		0.40638	0.37251	0.33316	0.3284	0.37641	0.39269	0.40553	0.40432	0.39002	0.37941	0.3933	0.37267	0.37551	0.38439	0.39586	0.41148	0.43929	0.43855	0.44054	0.44473	0.42113	0.42983	0.42706	0.44492	0.45719	0.45845	0.50074	0.49019	0.43985	0.43796	0.45166	0.50399	0.50656
Poland		0.81456	0.72526	0.66384	0.67553	0.66078	0.66666	0.69491	0.71356	0.71464	0.7214	0.5919	0.56255	0.58023	0.60599	0.62524	0.6503	0.7392	0.79598	0.82258	0.86137	0.83673	0.81795	0.81747	0.86258	0.96338	0.94031	1.00077	1.10143	1.07352	1.08004	1.14129	1.16241	1.08034
Portugal		0.3233	0.28885	0.38951	0.39183	0.40576	0.37792	0.41124	0.40015	0.42375	0.52314	0.52374	0.52432	0.58325	0.54943	0.55682	0.59889	0.57579	0.60874	0.67188	0.69689	0.6886	0.68978	0.71053	0.6723	0.67906	0.71277	0.62583	0.65247	0.59558	0.56659	0.57176	0.53513	0.47928
Romania		0.80276	0.7403	0.72711	0.67976	0.65364	0.68842	0.69318	0.72963	0.70779	0.7377	0.82703	0.59571	0.5344	0.42921	0.47518	0.52129	0.54842	0.57894	0.53055	0.45532	0.47322	0.4822	0.48802	0.45871	0.46809	0.45734	0.4468	0.45877	0.48992	0.4089	0.39627	0.44448	0.44311
Serbia		--	--	--	--	--	--	--	--	--	--	--	--	--	--	--	--	--	--	--	--	--	--	--	--	--	--	0.18316	0.18619	0.16281	0.16474	0.16974	0.16429	0.1623
Slovakia		--	--	--	--	--	--	--	--	--	--	--	--	--	0.13555	0.13725	0.1364	0.14354	0.15508	0.15501	0.14173	0.13905	0.15054	0.17533	0.15862	0.15876	0.16608	0.162	0.17623	0.17656	0.16545	0.17244	0.17323	0.15377
Slovenia		--	--	--	--	--	--	--	--	--	--	--	--	0.0738	0.07655	0.08633	0.09688	0.11204	0.1142	0.10924	0.10907	0.10611	0.10562	0.10364	0.10557	0.10711	0.11357	0.11406	0.11652	0.1344	0.11201	0.11002	0.11274	0.11039
Spain		2.09057	1.97622	2.11488	2.12264	1.77399	1.7746	1.79168	1.84808	2.03536	2.02894	2.0849	2.20237	2.28872	2.17567	2.30604	2.46617	2.48851	2.62784	2.82131	2.9098	3.0403	3.15709	3.15167	3.22946	3.2984	3.3691	3.32951	3.40843	3.25502	3.08008	3.0228	2.90249	2.70392
Sweden		1.13543	1.00783	0.85596	0.77202	0.72417	0.74766	0.77445	0.75471	0.72385	0.688	0.6863	0.6916	0.7577	0.7469	0.79978	0.79687	0.85345	0.80376	0.82478	0.81343	0.74446	0.75063	0.7521	0.75155	0.75161	0.72603	0.7148	0.74122	0.68024	0.64809	0.71006	0.63939	0.60879
Switzerland		0.64147	0.51886	0.48892	0.53489	0.51422	0.56066	0.56134	0.54261	0.54534	0.53724	0.54866	0.5711	0.57908	0.54592	0.53761	0.54677	0.55586	0.54648	0.57175	0.57517	0.55996	0.56527	0.54535	0.55106	0.57216	0.55495	0.55332	0.54718	0.54866	0.53152	0.49518	0.52684	0.53246
Turkey		0.66742	0.59441	0.68927	0.71899	0.72205	0.75515	0.81275	0.92185	0.90768	0.92926	0.98598	0.96006	1.01621	1.16224	1.11261	1.2473	1.30315	1.28556	1.27392	1.26733	1.3368	1.24598	1.33466	1.30991	1.34023	1.32368	1.37236	1.45931	1.37417	1.41496	1.30085	1.39132	1.34917
United Kingdom		3.62273	3.29372	3.29317	3.14351	3.82463	3.34091	3.35518	3.27894	3.46428	3.53643	3.61988	3.66379	3.69836	3.71114	3.69829	3.66076	3.74817	3.65244	3.61272	3.64162	3.56063	3.51786	3.67816	3.72073	3.78744	3.67007	3.64007	3.70824	3.49149	3.32412	3.28077	3.25177	3.07166
Eurasia		18.7335	18.7025	18.9782	18.6952	18.6632	18.6741	19.09	19.1339	18.8232	18.2956	17.5356	17.4466	14.4268	10.0742	10.2117	9.69733	8.47408	8.17729	7.98405	7.75496	7.77748	7.81993	7.89589	8.04813	8.28157	8.49402	7.23831	8.3228	8.80882	8.35936	8.39249	8.80415	9.25586
Armenia		--	--	--	--	--	--	--	--	--	--	--	--	0.09494	0.04995	0.03811	0.05261	0.05963	0.06531	0.06784	0.06964	0.07504	0.07831	0.08144	0.08407	0.0865	0.09312	0.09468	0.09775	0.0997	0.09568	0.09736	0.10045	0.09875
Azerbaijan		--	--	--	--	--	--	--	--	--	--	--	--	0.42777	0.33439	0.39456	0.38114	0.28498	0.27713	0.31824	0.32379	0.29346	0.25795	0.23717	0.23472	0.23993	0.2438	0.256	0.22951	0.17907	0.16349	0.15924	0.17334	0.17399
Belarus		--	--	--	--	--	--	--	--	--	--	--	--	0.79379	0.56232	0.51555	0.48909	0.44022	0.39559	0.36187	0.31668	0.29439	0.27425	0.2596	0.2999	0.33097	0.35996	0.36482	0.37089	0.33365	0.3804	0.31665	0.3906	0.38981
Estonia		--	--	--	--	--	--	--	--	--	--	--	--	0.05324	0.05369	0.05388	0.0531	0.05323	0.05743	0.05901	0.05161	0.04773	0.04909	0.04891	0.05059	0.05769	0.05919	0.05725	0.06032	0.0513	0.05235	0.0488	0.05457	0.05805
Former U.S.S.R.		18.7335	18.7025	18.9782	18.6952	18.6632	18.6741	19.09	19.1339	18.8232	18.2956	17.5356	17.4466	--	--	--	--	--	--	--	--	--	--	--	--	--	--	--	--	--	--	--	--	--
Georgia		--	--	--	--	--	--	--	--	--	--	--	--	0.0579	0.02658	0.0156	0.01664	0.02936	0.03114	0.03189	0.03524	0.03225	0.02512	0.02408	0.02459	0.02583	0.02992	0.03224	0.03659	0.04002	0.03968	0.04218	0.03996	0.03401
Kazakhstan		--	--	--	--	--	--	--	--	--	--	--	--	0.85366	0.61772	0.62317	0.56258	0.51015	0.4585	0.41438	0.36338	0.41168	0.43548	0.44521	0.42266	0.45582	0.4706	0.48156	0.49192	0.52504	0.42644	0.41822	0.43784	0.50816
Kyrgyzstan		--	--	--	--	--	--	--	--	--	--	--	--	0.06765	0.03816	0.0181	0.0239	0.02558	0.02155	0.02879	0.02382	0.02172	0.01908	0.02058	0.01937	0.0247	0.02785	0.02769	0.02928	0.05441	0.07131	0.06823	0.07114	0.06991
Latvia		--	--	--	--	--	--	--	--	--	--	--	--	0.11084	0.08112	0.08487	0.08884	0.10027	0.07465	0.07467	0.0647	0.05981	0.06188	0.05846	0.06169	0.06678	0.07245	0.07788	0.07208	0.07581	0.06718	0.06592	0.07252	0.06716
Lithuania		--	--	--	--	--	--	--	--	--	--	--	--	0.17986	0.14389	0.16988	0.15795	0.1398	0.14088	0.15005	0.12847	0.11594	0.11134	0.10821	0.10402	0.11046	0.1385	0.14902	0.15369	0.14356	0.11508	0.11507	0.12117	0.14678
Moldova		--	--	--	--	--	--	--	--	--	--	--	--	0.12306	0.0869	0.04815	0.04671	0.04139	0.03827	0.03172	0.02029	0.01927	0.02104	0.02386	0.02561	0.02835	0.02889	0.02902	0.0308	0.03301	0.02866	0.03384	0.03391	0.03922
Russia		--	--	--	--	--	--	--	--	--	--	--	--	9.3246	6.48471	6.67586	6.27107	5.52033	5.38464	5.22418	5.30158	5.38857	5.35359	5.43545	5.51211	5.61968	5.68663	4.36687	5.43714	6.16469	5.93777	6.01929	6.25649	6.5393
Tajikistan		--	--	--	--	--	--	--	--	--	--	--	--	0.04101	0.02922	0.02456	0.02679	0.0311	0.03377	0.03944	0.0428	0.04682	0.04895	0.04991	0.05389	0.05758	0.06193	0.0661	0.07732	0.02285	0.02178	0.02474	0.02944	0.03033
Turkmenistan		--	--	--	--	--	--	--	--	--	--	--	--	0.15906	0.11656	0.12744	0.12696	0.12596	0.14068	0.12298	0.11279	0.13087	0.15359	0.16288	0.18233	0.19837	0.20055	0.19909	0.20869	0.18762	0.17527	0.20224	0.2171	0.24049
Ukraine		--	--	--	--	--	--	--	--	--	--	--	--	1.73712	1.11871	1.05999	1.01161	0.80802	0.76444	0.75185	0.58793	0.53713	0.62379	0.6283	0.65998	0.66445	0.7212	0.74704	0.72803	0.71621	0.59139	0.58172	0.60343	0.64116
Uzbekistan		--	--	--	--	--	--	--	--	--	--	--	--	0.40229	0.33032	0.36199	0.38833	0.30405	0.29332	0.30715	0.31226	0.30279	0.30648	0.31183	0.31261	0.31447	0.29942	0.28904	0.29878	0.18188	0.19289	0.199	0.2022	0.21875
Middle East		4.33648	4.65476	4.9319	5.50141	5.63378	5.94041	6.28085	6.4365	6.65012	6.87478	7.21194	7.32797	7.77476	6.54906	8.45994	8.50105	8.65928	9.10021	9.34665	9.50121	9.78129	10.1326	10.4619	10.8638	11.3656	11.9498	12.521	12.0983	13.7357	13.9252	14.2976	15.1201	15.8704
Bahrain		0.03282	0.03223	0.03183	0.03134	0.03232	0.03321	0.03232	0.03854	0.03857	0.03954	0.04171	0.04318	0.04407	0.03186	0.04342	0.04367	0.04147	0.04048	0.0452	0.0455	0.04787	0.04814	0.04784	0.05203	0.05833	0.06147	0.08054	0.08879	0.09079	0.09314	0.09693	0.10096	0.09803
Iran		1.25242	1.23886	1.39553	1.67001	1.62019	1.65887	1.75874	1.83785	1.84934	2.0451	2.11957	2.26508	2.28367	2.10527	2.3726	2.39278	2.34199	2.56026	2.53424	2.50897	2.5856	2.67519	2.80381	2.94627	3.05784	3.19875	3.3822	3.43871	3.69508	3.66513	3.57821	3.52341	3.54291
Iraq		0.45199	0.45174	0.43093	0.52568	0.51089	0.53612	0.58841	0.59583	0.66779	0.72656	0.83076	0.55603	0.72596	0.74423	0.97952	1.00756	0.99906	0.92262	0.94098	0.95002	0.96155	1.02574	1.05181	0.96713	1.05099	1.12303	1.09259	1.19294	1.24096	1.36581	1.38633	1.5077	1.57311
Israel		0.34619	0.35246	0.3473	0.32206	0.30626	0.27491	0.28278	0.30156	0.33531	0.34816	0.34977	0.36811	0.42764	0.34937	0.42563	0.44162	0.44908	0.49174	0.48612	0.50256	0.53929	0.5786	0.51969	0.52653	0.50053	0.53485	0.51652	0.53047	0.46989	0.4761	0.50471	0.53745	0.6164
Jordan		0.07704	0.09157	0.10455	0.11201	0.11582	0.12035	0.13005	0.14122	0.13145	0.13194	0.14053	0.13217	0.15431	0.13256	0.1726	0.18012	0.19412	0.18643	0.20339	0.20175	0.21287	0.20799	0.21744	0.22326	0.22278	0.2334	0.22303	0.21279	0.20474	0.19808	0.2186	0.23232	0.22329
Kuwait		0.22542	0.24744	0.24543	0.25867	0.25593	0.2561	0.25146	0.24143	0.25144	0.26149	0.17834	0.19698	0.25192	0.21336	0.35233	0.37104	0.40549	0.45524	0.51288	0.54121	0.55467	0.56835	0.59181	0.62399	0.64833	0.70372	0.68611	0.69033	0.69011	0.80401	0.82877	0.88631	0.8359
Lebanon		0.09504	0.08772	0.08654	0.09091	0.08727	0.10118	0.09617	0.09961	0.09047	0.07098	0.067	0.1125	0.11294	0.12961	0.15843	0.16926	0.17616	0.20336	0.20768	0.21699	0.2195	0.21232	0.21319	0.21689	0.21108	0.20113	0.17873	0.16467	0.21776	0.26631	0.24879	0.27696	0.21674
Oman		0.03535	0.03418	0.04065	0.04337	0.05114	0.06115	0.06148	0.05506	0.05389	0.06522	0.07992	0.08014	0.08206	0.07715	0.0834	0.08868	0.09722	0.10155	0.10427	0.11093	0.10905	0.1125	0.11843	0.12033	0.13359	0.15013	0.1633	0.18988	0.25804	0.21943	0.23375	0.25321	0.29829
Palestinian Territories		--	--	--	--	--	--	--	--	--	--	--	--	--	--	--	--	--	0.00582	0.00902	0.00977	0.01198	0.01944	0.01672	0.01853	0.03142	0.03957	0.04294	0.04365	0.03271	0.03166	0.03166	0.03877	0.0451
Qatar		0.02165	0.03746	0.04268	0.04096	0.04964	0.04323	0.05366	0.05486	0.05132	0.05291	0.05354	0.05369	0.05527	0.03552	0.05941	0.06374	0.07196	0.07244	0.07576	0.078	0.08792	0.09762	0.1163	0.13291	0.14955	0.15268	0.18117	0.21853	0.35118	0.25871	0.24924	0.32341	0.38353
Saudi Arabia		1.31361	1.43432	1.51721	1.68547	1.81761	1.96053	2.08278	2.08177	2.10766	2.02464	2.21978	2.31593	2.40645	1.58176	2.50651	2.4192	2.57587	2.68916	2.81207	2.894	3.01105	3.15352	3.28705	3.54055	3.7792	3.95933	4.19947	3.50402	4.20002	4.39937	4.69131	5.18316	5.91252
Syria		0.23149	0.25307	0.25612	0.29646	0.32515	0.34574	0.34583	0.38415	0.4066	0.41994	0.4356	0.37367	0.38812	0.39264	0.47807	0.48355	0.48936	0.51366	0.52977	0.54302	0.54208	0.53732	0.54351	0.54685	0.54339	0.54652	0.54817	0.56186	0.65669	0.66668	0.66653	0.67115	0.54038
United Arab Emirates		0.15737	0.29592	0.31857	0.32034	0.32946	0.40236	0.456	0.46439	0.52242	0.5339	0.53516	0.66452	0.66969	0.62701	0.69032	0.68996	0.66491	0.6988	0.71454	0.7196	0.70418	0.69018	0.70837	0.7041	0.73227	0.78844	0.94576	1.00616	1.31531	1.20537	1.29747	1.32212	1.30714
Yemen		0.09609	0.09778	0.11456	0.10413	0.13211	0.14669	0.14115	0.14022	0.14387	0.15439	0.16025	0.16598	0.17264	0.12871	0.13769	0.14988	0.15258	0.15864	0.17072	0.17888	0.19367	0.20573	0.22587	0.24444	0.2463	0.25679	0.28046	0.25545	0.31243	0.27542	0.26526	0.26313	0.27708
Africa		3.08541	3.29646	3.46378	3.54129	3.68611	3.80042	3.79927	3.83463	3.97829	4.12837	4.32234	4.40535	4.47881	3.88692	4.5483	4.67476	4.79648	4.92505	4.97906	5.07184	5.13941	5.32552	5.474	5.58026	5.78245	6.09026	6.21948	6.37432	6.66395	6.62286	6.85077	6.76732	6.93254
Algeria		0.23841	0.24773	0.27955	0.26447	0.30546	0.32001	0.31898	0.32511	0.33433	0.35723	0.38154	0.40967	0.41249	0.2829	0.40051	0.40067	0.38851	0.38556	0.39996	0.37947	0.39994	0.42081	0.43743	0.44491	0.46413	0.49543	0.49676	0.53518	0.60729	0.63469	0.63625	0.64947	0.64565
Angola		0.04304	0.04327	0.04506	0.04738	0.0411	0.0532	0.05237	0.0518	0.05298	0.05355	0.05247	0.05443	0.05585	0.0511	0.05398	0.05771	0.05418	0.06334	0.05277	0.06443	0.06065	0.0893	0.09297	0.09863	0.09953	0.10226	0.11524	0.13187	0.14732	0.15408	0.17869	0.18003	0.1921
Benin		0.00619	0.00616	0.00412	0.00624	0.00614	0.0073	0.00708	0.00541	0.00658	0.00705	0.00824	0.00948	0.0106	0.01163	0.01226	0.01341	0.0144	0.01574	0.01698	0.0185	0.02297	0.02304	0.02443	0.02874	0.03358	0.03521	0.04185	0.04565	0.05035	0.06285	0.07043	0.07292	0.06409
Botswana		0.00619	0.00617	0.00404	0.00404	0.00426	0.0077	0.00728	0.00869	0.00956	0.01151	0.01285	0.01439	0.01672	0.01454	0.0164	0.0164	0.0164	0.01862	0.01881	0.01881	0.02754	0.02291	0.02193	0.02193	0.02676	0.0288	0.03015	0.03092	0.04043	0.03675	0.03872	0.04	0.03091
Burkina Faso		0.00613	0.00617	0.00618	0.00621	0.00621	0.00591	0.00692	0.00722	0.00738	0.0066	0.00696	0.00798	0.00801	0.00818	0.00943	0.00943	0.00971	0.01588	0.01482	0.01482	0.01563	0.01585	0.01627	0.01681	0.01699	0.01735	0.01735	0.0193	0.02842	0.02386	0.02431	0.02453	0.02058
Burundi		0.00144	0.00164	0.00144	0.00166	0.00207	0.00215	0.00209	0.00217	0.0036	0.00394	0.00431	0.00484	0.00462	0.00303	0.00541	0.00528	0.00535	0.00541	0.0055	0.0055	0.00548	0.00582	0.00587	0.00609	0.00556	0.00545	0.00527	0.00474	0.0028	0.00295	0.00294	0.00283	0.00459
Cameroon		0.0331	0.03343	0.03925	0.03914	0.03915	0.0399	0.04589	0.0425	0.0406	0.05008	0.05053	0.05097	0.05164	0.0327	0.04708	0.04822	0.04664	0.04871	0.04853	0.04443	0.04653	0.04612	0.04603	0.0481	0.04785	0.04843	0.05349	0.0599	0.06512	0.06835	0.07559	0.07252	0.06114
Cape Verde		0.00454	0.00453	0.002	0.00196	0.00239	0.00236	0.0008	0.00089	0.00128	0.00137	0.00146	0.0015	0.00159	0.00135	0.00172	0.00168	0.00177	0.00177	0.00177	0.00177	0.0031	0.00208	0.00222	0.00222	0.00427	0.00367	0.00413	0.00486	0.00511	0.00545	0.00545	0.00556	0.00553
Central African Republic		0.00205	0.00266	0.00287	0.00308	0.00291	0.00295	0.00348	0.00314	0.00335	0.00318	0.00345	0.00362	0.0037	0.00379	0.00402	0.00401	0.00406	0.00416	0.00424	0.00424	0.00454	0.00464	0.00482	0.00482	0.00453	0.00432	0.00454	0.00498	0.00526	0.00477	0.00477	0.00473	0.00607
Chad		0.00407	0.00389	0.00389	0.00389	0.00186	0.00222	0.00399	0.00348	0.00232	0.00238	0.00493	0.00461	0.00464	0.00194	0.00248	0.00247	0.00255	0.00257	0.00257	0.00257	0.00278	0.00284	0.00293	0.00293	0.00272	0.00302	0.00325	0.00379	0.00372	0.00364	0.00364	0.00373	0.00384
Comoros		0.00061	0.00061	0.00061	0.00061	0.00062	0.00053	0.00053	0.00085	0.00089	0.00089	0.00116	0.00112	0.00112	0.00088	0.00116	0.00116	0.00116	0.00116	0.00121	0.00121	0.00134	0.00138	0.00143	0.00143	0.00146	0.00156	0.00159	0.00199	0.00214	0.00209	0.00181	0.00207	0.00217
Congo (Brazzaville)		0.01047	0.01245	0.01028	0.00807	0.00846	0.01188	0.01149	0.01296	0.01157	0.01296	0.01418	0.01246	0.01209	0.00899	0.01088	0.01074	0.01039	0.01033	0.01046	0.0086	0.00916	0.01172	0.01004	0.01253	0.01383	0.01557	0.01689	0.0186	0.02116	0.02405	0.02792	0.02667	0.02435
Congo (Kinshasa)		0.04055	0.04297	0.04505	0.04469	0.04095	0.03962	0.04342	0.0388	0.0488	0.04576	0.04257	0.04504	0.0511	0.04894	0.04101	0.04262	0.04423	0.04295	0.04061	0.03517	0.02926	0.0197	0.01666	0.01675	0.02344	0.024	0.02333	0.02639	0.0244	0.02355	0.0302	0.02464	0.01998
Cote dIvoire (IvoryCoast)		0.05991	0.06331	0.05829	0.06265	0.06159	0.06307	0.06627	0.07391	0.07783	0.07771	0.06429	0.05288	0.05304	0.05192	0.06275	0.06147	0.0642	0.05739	0.05491	0.06232	0.06926	0.04559	0.04761	0.04735	0.05548	0.05684	0.05574	0.05046	0.06009	0.0534	0.0557	0.05661	0.04779
Djibouti		0.02205	0.0177	0.01779	0.01314	0.01096	0.01082	0.00974	0.00996	0.00973	0.02304	0.02326	0.02353	0.02359	0.02266	0.02427	0.02416	0.02416	0.0245	0.0245	0.0245	0.02465	0.02502	0.02506	0.02559	0.0259	0.02565	0.02374	0.02319	0.0169	0.01667	0.01667	0.01859	0.02399
Egypt		0.55156	0.63445	0.68013	0.79837	0.86936	0.91694	0.92084	0.94353	0.93298	0.94354	0.99365	0.97358	0.94448	0.81141	0.96691	0.98589	1.07382	1.13783	1.18687	1.19773	1.15478	1.1317	1.17183	1.1715	1.25672	1.29556	1.35429	1.41643	1.48647	1.44199	1.47859	1.57756	1.62567
Equatorial Guinea		0.00083	0.00082	0.00104	0.00103	0.00104	0.00118	0.00119	0.00114	0.00114	0.00166	0.00171	0.00179	0.0017	0.00179	0.00184	0.00183	0.00188	0.00201	0.00201	0.00201	0.0032	0.00241	0.00241	0.0025	0.00213	0.00222	0.00232	0.0036	0.01102	0.00646	0.01085	0.00809	0.00499
Eritrea		--	--	--	--	--	--	--	--	--	--	--	--	--	--	0.01373	0.0152	0.01553	0.01573	0.01684	0.01421	0.00887	0.01051	0.00976	0.01102	0.01036	0.01035	0.01033	0.00971	0.0058	0.00712	0.00699	0.00645	0.01005
Ethiopia		0.02518	0.02531	0.02803	0.03223	0.03142	0.03773	0.03593	0.04095	0.03935	0.04171	0.0419	0.03454	0.04994	0.04263	0.03018	0.03298	0.02426	0.02433	0.0359	0.04467	0.04783	0.04918	0.05412	0.05822	0.06017	0.06292	0.07102	0.07865	0.09969	0.096	0.08897	0.09879	0.11372
Gabon		0.02317	0.02554	0.02309	0.03022	0.02547	0.02273	0.0207	0.02208	0.0247	0.03343	0.03289	0.0332	0.03448	0.02952	0.03288	0.02995	0.03174	0.03379	0.03229	0.02777	0.02571	0.02619	0.02526	0.02645	0.02668	0.02658	0.0293	0.03266	0.04166	0.03045	0.03468	0.02936	0.03322
Gambia, The		0.00224	0.00223	0.00223	0.00223	0.00246	0.00242	0.00225	0.0026	0.00269	0.00265	0.00271	0.00282	0.00282	0.00299	0.00331	0.00309	0.00308	0.00309	0.00327	0.00327	0.00365	0.00392	0.00401	0.00406	0.00408	0.00423	0.00453	0.00559	0.00609	0.00623	0.00677	0.00599	0.0065
Ghana		0.03273	0.02872	0.03269	0.02926	0.03346	0.028	0.03293	0.03779	0.04449	0.04983	0.04204	0.04159	0.04663	0.04332	0.05372	0.05547	0.05659	0.0537	0.05491	0.06379	0.0754	0.07379	0.0785	0.0849	0.09183	0.09304	0.09539	0.09615	0.09413	0.10789	0.13028	0.13082	0.1287
Guinea		0.0122	0.01195	0.01217	0.01212	0.01244	0.01071	0.01429	0.01504	0.0154	0.01488	0.02006	0.01555	0.01593	0.01489	0.01683	0.01668	0.01682	0.01687	0.01696	0.01696	0.01761	0.0178	0.01793	0.01802	0.01813	0.01869	0.01854	0.01817	0.01903	0.01941	0.01941	0.01922	0.01863
Guinea-Bissau		0.00123	0.00123	0.00125	0.00125	0.00168	0.00181	0.00142	0.00262	0.00293	0.00307	0.00388	0.00397	0.004	0.00343	0.00437	0.00432	0.00436	0.00437	0.00437	0.00437	0.00485	0.0049	0.00508	0.00521	0.00518	0.00538	0.00533	0.00551	0.00547	0.00557	0.00557	0.00565	0.00622
Kenya		0.08526	0.08257	0.08238	0.07763	0.07566	0.0776	0.08291	0.07312	0.08085	0.08735	0.08801	0.07693	0.08506	0.081	0.09229	0.09693	0.10081	0.0933	0.10745	0.10937	0.11885	0.10895	0.10744	0.1139	0.12369	0.13758	0.15278	0.15211	0.14387	0.15785	0.16676	0.16917	0.17011
Lesotho		0.00212	0.00192	0.00212	0.00212	0.00212	0.00219	0.0022	0.0022	0.0015	0.0022	0.0022	0.0022	0.00224	0.00215	0.00246	0.00246	0.00246	0.00246	0.00249	0.00249	0.0029	0.0029	0.0029	0.0029	0.00289	0.0031	0.00321	0.00354	0.00385	0.00321	0.00757	0.00612	0.00369
Liberia		0.02841	0.02609	0.02612	0.02605	0.02348	0.02349	0.01788	0.01326	0.01722	0.01361	0.00814	0.00476	0.00483	0.0049	0.00533	0.00533	0.00553	0.00559	0.00577	0.00577	0.00616	0.00652	0.00705	0.00727	0.00735	0.00745	0.00858	0.00942	0.00857	0.00775	0.00753	0.00826	0.00753
Libya		0.20894	0.2423	0.26173	0.26349	0.25644	0.27134	0.26602	0.2839	0.30007	0.30827	0.32676	0.34883	0.31415	0.26622	0.34916	0.37387	0.39151	0.41598	0.39168	0.40087	0.43761	0.4678	0.49067	0.50865	0.53868	0.56184	0.56223	0.5667	0.5466	0.56233	0.59362	0.27529	0.36075
Madagascar		0.01713	0.01458	0.01252	0.0165	0.01646	0.01819	0.01216	0.01746	0.01933	0.01362	0.01312	0.01363	0.01465	0.01385	0.01694	0.0176	0.01764	0.01783	0.01792	0.01792	0.02516	0.02764	0.03185	0.03297	0.03617	0.03471	0.03444	0.03452	0.02901	0.02532	0.0256	0.02507	0.03959
Malawi		0.00618	0.00722	0.0059	0.0049	0.00472	0.00554	0.00545	0.0054	0.0054	0.00687	0.00718	0.0092	0.00915	0.00806	0.00955	0.01	0.01016	0.01018	0.01027	0.01027	0.01072	0.01092	0.01105	0.01109	0.01279	0.01378	0.01427	0.01476	0.01529	0.01242	0.01242	0.0123	0.02547
Mali		0.00618	0.00822	0.00616	0.00613	0.00615	0.00675	0.0051	0.00601	0.00311	0.00659	0.00656	0.00678	0.00689	0.00705	0.00726	0.00726	0.00741	0.00756	0.00765	0.00765	0.00785	0.00787	0.00862	0.0087	0.00896	0.00995	0.00902	0.00924	0.00969	0.00964	0.00964	0.01025	0.01067
Mauritania		0.00878	0.00851	0.00851	0.00844	0.0126	0.0125	0.00709	0.0098	0.01269	0.01483	0.01314	0.01388	0.0456	0.03888	0.04679	0.04752	0.0478	0.04821	0.04843	0.04843	0.04943	0.04941	0.04714	0.04837	0.04107	0.04859	0.04155	0.03824	0.02733	0.02677	0.02677	0.02508	0.03756
Mauritius		0.01278	0.01139	0.01101	0.01213	0.01211	0.0123	0.01518	0.01304	0.01909	0.02158	0.02488	0.02522	0.03019	0.02776	0.03058	0.03261	0.03322	0.03372	0.03403	0.03403	0.0417	0.04549	0.04107	0.04299	0.04454	0.04561	0.04633	0.04799	0.04829	0.04289	0.04361	0.04568	0.05196
Morocco		0.18703	0.17995	0.18417	0.18587	0.17833	0.18759	0.19585	0.19041	0.20391	0.22948	0.24147	0.24193	0.26943	0.22712	0.30466	0.2895	0.28026	0.29523	0.29015	0.32096	0.31911	0.32304	0.32785	0.33325	0.33934	0.34565	0.36048	0.3656	0.45754	0.46541	0.48268	0.47494	0.40797
Mozambique		0.02825	0.02377	0.02775	0.02795	0.02571	0.02818	0.01387	0.01426	0.02124	0.01678	0.01475	0.01452	0.01435	0.01402	0.01355	0.01494	0.01477	0.0153	0.01586	0.01642	0.01628	0.01953	0.02203	0.02335	0.02761	0.02771	0.02824	0.02963	0.02804	0.03107	0.03319	0.03495	0.04443
Namibia		--	--	--	--	--	--	--	--	--	--	0.03235	0.01587	0.01505	0.01472	0.01762	0.01762	0.01848	0.01954	0.02089	0.02409	0.02554	0.03059	0.03134	0.03389	0.03572	0.03605	0.03886	0.04088	0.04325	0.04468	0.04257	0.04499	0.05138
Niger		0.0083	0.00827	0.00829	0.00622	0.00625	0.00625	0.0052	0.00498	0.00866	0.00881	0.00915	0.00924	0.00949	0.00956	0.00995	0.00991	0.00993	0.00995	0.00995	0.00995	0.01037	0.01056	0.01105	0.01127	0.01125	0.01128	0.01118	0.01132	0.00706	0.01053	0.01053	0.01026	0.01167
Nigeria		0.34987	0.41162	0.43835	0.41271	0.42653	0.45199	0.4257	0.44635	0.48157	0.50039	0.51517	0.53072	0.54093	0.50439	0.51763	0.58391	0.5908	0.57739	0.53893	0.52517	0.50243	0.62099	0.61566	0.58791	0.55845	0.63109	0.5744	0.54341	0.57092	0.48269	0.48656	0.48214	0.54218
Reunion		0.00881	0.00874	0.00934	0.01096	0.01202	0.01167	0.01152	0.01276	0.0152	0.01655	0.01752	0.02032	0.02098	0.02144	0.02754	0.02728	0.0273	0.02751	0.03505	0.03505	0.03644	0.03812	0.03805	0.03805	0.0386	0.03944	0.04002	0.04043	0.04221	0.04266	0.04266	0.0416	0.04059
Rwanda		0.00223	0.00519	0.00497	0.00568	0.00925	0.00953	0.00936	0.00954	0.00954	0.0099	0.01025	0.01038	0.01066	0.00712	0.00987	0.01003	0.01	0.01017	0.01034	0.01034	0.01089	0.01101	0.01105	0.01119	0.01082	0.01153	0.01178	0.01038	0.01082	0.01097	0.01091	0.01137	0.0109
Saint Helena		0	4e-05	4e-05	4e-05	4e-05	4e-05	4e-05	9e-05	9e-05	9e-05	9e-05	4e-05	4e-05	9e-05	9e-05	9e-05	9e-05	9e-05	9e-05	9e-05	0.00031	0.00018	0.00018	0.00018	0.00013	0.00018	0.00016	0.00018	0.00014	0.00013	0.00013	0.00021	0.00017
Sao Tome and Principe		0.00047	0.00047	0.00047	0.00047	0.00047	0.00048	0.00049	0.00049	0.00049	0.00049	0.00097	0.00102	0.00106	0.00101	0.0011	0.0011	0.0011	0.0011	0.0011	0.0011	0.00128	0.00128	0.00132	0.00132	0.00132	0.00137	0.0015	0.00184	0.00189	0.00184	0.00185	0.00187	0.00191
Senegal		0.03698	0.03586	0.03666	0.03503	0.04167	0.04088	0.04037	0.04066	0.03474	0.03616	0.03577	0.03308	0.04033	0.03352	0.04963	0.05325	0.05312	0.04928	0.05251	0.05796	0.06154	0.06142	0.06231	0.06292	0.0701	0.07505	0.0771	0.07789	0.0553	0.07518	0.0763	0.07911	0.08769
Seychelles		0.00316	0.00253	0.00234	0.00405	0.00426	0.00437	0.00438	0.00467	0.00647	0.00686	0.0063	0.00678	0.00697	0.0071	0.00725	0.00729	0.00727	0.00782	0.00782	0.00782	0.0081	0.00835	0.01215	0.01185	0.01228	0.01209	0.016	0.01338	0.01469	0.01593	0.01342	0.017	0.01783
Sierra Leone		0.01057	0.01063	0.01141	0.01076	0.01071	0.01167	0.01259	0.01352	0.01472	0.01469	0.01482	0.01553	0.01135	0.00935	0.01052	0.01216	0.01213	0.01243	0.01247	0.01247	0.0132	0.0135	0.01373	0.01405	0.01666	0.01656	0.01655	0.01768	0.02116	0.01936	0.01936	0.02066	0.01886
Somalia		0.01656	0.01929	0.01893	0.0185	0.0192	0.01888	0.02008	0.0149	0.01508	0.01535	0.01402	0.00835	0.00776	0.00767	0.00803	0.00803	0.00803	0.00803	0.00803	0.00803	0.00998	0.00998	0.00998	0.00998	0.00996	0.0101	0.01059	0.01194	0.01159	0.01125	0.01125	0.01041	0.01174
South Africa		0.65894	0.68123	0.7332	0.70469	0.75097	0.7284	0.72725	0.72082	0.71624	0.72892	0.78511	0.83265	0.85053	0.76345	0.84411	0.86304	0.87865	0.89736	0.91889	0.95613	0.9389	0.94019	0.97695	1.00793	1.03042	1.09746	1.13118	1.15506	1.11781	1.09031	1.12804	1.22164	1.25002
Sudan and South Sudan		0.0471	0.04822	0.05269	0.05063	0.04653	0.05199	0.05931	0.0575	0.06239	0.0592	0.05375	0.07716	0.0707	0.05898	0.05887	0.05607	0.05561	0.05749	0.05791	0.06209	0.09081	0.11734	0.12177	0.13689	0.1488	0.15924	0.17815	0.17255	0.19981	0.25739	0.26583	0.26837	0.19284
Swaziland		0.00424	0.00404	0.00404	0.00404	0.00406	0.00455	0.00403	0.00458	0.00495	0.00504	0.00515	0.00569	0.00558	0.00594	0.007	0.007	0.00698	0.007	0.007	0.007	0.00711	0.00711	0.00711	0.00711	0.00709	0.00709	0.00787	0.0094	0.01039	0.00956	0.00956	0.00964	0.00911
Tanzania		0.02872	0.03295	0.03216	0.02853	0.03093	0.03137	0.03807	0.03343	0.03554	0.03474	0.03844	0.03183	0.03494	0.03472	0.03283	0.03193	0.03202	0.03243	0.0327	0.03425	0.03438	0.03977	0.04556	0.04867	0.05185	0.05594	0.05868	0.06329	0.06932	0.07202	0.06435	0.07325	0.0997
Togo		0.00861	0.00795	0.00769	0.00838	0.00991	0.00921	0.00753	0.00705	0.00741	0.00842	0.00836	0.01407	0.00999	0.00695	0.00866	0.00861	0.00867	0.00905	0.00905	0.01395	0.01945	0.014	0.018	0.02964	0.03148	0.03105	0.03218	0.03484	0.01872	0.01857	0.01971	0.02017	0.02264
Tunisia		0.10977	0.12081	0.10959	0.1253	0.12048	0.11468	0.12935	0.10864	0.12696	0.13167	0.1318	0.1427	0.14859	0.1347	0.1551	0.14329	0.15031	0.15982	0.16538	0.16412	0.17261	0.17796	0.18026	0.17918	0.18243	0.18285	0.17876	0.17912	0.19451	0.17492	0.17482	0.18549	0.17807
Uganda		0.01035	0.0066	0.00788	0.00767	0.00785	0.0084	0.00932	0.00792	0.01209	0.0111	0.01187	0.01327	0.01356	0.01266	0.01444	0.01444	0.01435	0.01481	0.01699	0.01699	0.01756	0.01958	0.02044	0.02204	0.02233	0.02341	0.02673	0.02886	0.05081	0.04561	0.0472	0.04722	0.03537
Western Sahara		0.00236	0.00235	0.00264	0.00256	0.00265	0.0027	0.00271	0.00279	0.00283	0.00283	0.00296	0.00296	0.003	0.00281	0.00292	0.00313	0.00313	0.00313	0.00313	0.00313	0.0036	0.00366	0.00366	0.00366	0.00364	0.00412	0.00365	0.00383	0.00361	0.00365	0.00365	0.00364	0.00426
Zambia		0.03309	0.03004	0.02924	0.02906	0.02673	0.02502	0.02506	0.02645	0.02868	0.02805	0.02807	0.02381	0.02722	0.02048	0.02233	0.02274	0.02313	0.02329	0.02453	0.02323	0.02235	0.02445	0.02533	0.02647	0.02752	0.0293	0.03016	0.03067	0.02516	0.02697	0.03015	0.03551	0.04221
Zimbabwe		0.02633	0.0302	0.02447	0.03092	0.03039	0.03157	0.03333	0.03598	0.03573	0.03991	0.04318	0.04844	0.04281	0.0447	0.04711	0.05095	0.05798	0.0622	0.06351	0.06356	0.05205	0.04818	0.04584	0.04191	0.02723	0.03255	0.02848	0.02733	0.02684	0.02574	0.02737	0.02883	0.04319
Asia & Oceania		22.6824	22.3953	21.7616	21.5951	22.5547	22.3384	23.0481	23.868	25.7373	27.3006	28.7107	30.0329	31.6385	30.3436	35.3954	37.1735	38.8681	40.444	39.8681	41.8593	42.9427	43.1994	44.1705	46.1849	48.7064	49.7866	50.6727	51.8407	51.4948	53.4752	56.4614	57.7614	59.0145
Afghanistan		0.01462	0.01665	0.0162	0.0221	0.02241	0.02701	0.02843	0.02895	0.02738	0.0279	0.02848	0.02653	0.01484	0.01373	0.01372	0.01309	0.01234	0.01157	0.01099	0.01099	0.00974	0.00968	0.00986	0.00786	0.0085	0.00914	0.00911	0.00932	0.01056	0.07231	0.07231	0.0718	0.0718
American Samoa		0.00593	0.00692	0.00962	0.00603	0.00695	0.00652	0.00673	0.00686	0.00676	0.00776	0.00807	0.00807	0.00827	0.00797	0.00803	0.0079	0.00801	0.00803	0.00803	0.00803	0.00784	0.00786	0.00799	0.00799	0.00795	0.00846	0.00861	0.00922	0.00572	0.00861	0.00417	0.00625	0.00842
Australia		1.21635	1.16711	1.25194	1.2053	1.28951	1.28641	1.29482	1.32628	1.39591	1.45096	1.47281	1.43823	1.45514	1.51093	1.56498	1.60936	1.65518	1.6817	1.68836	1.73718	1.73687	1.7291	1.75075	1.7594	1.93653	1.84876	1.85529	2.06571	1.93496	1.90269	1.91978	2.04498	2.08991
Bangladesh		0.06785	0.07081	0.07379	0.06398	0.06651	0.06873	0.07283	0.07181	0.07568	0.08072	0.07611	0.08077	0.07971	0.07792	0.09744	0.10799	0.11032	0.11863	0.12301	0.14213	0.14518	0.17171	0.17491	0.17677	0.17828	0.18278	0.19168	0.1916	0.19956	0.21242	0.22648	0.23091	0.23855
Bhutan		4e-05	0.00033	0.00044	0.0004	0.00034	0.00044	0.00045	0.00053	0.00052	0.00053	0.00123	0.00123	0.00127	0.00101	0.00146	0.00168	0.00181	0.00185	0.00194	0.00194	0.00198	0.00212	0.00221	0.0023	0.00229	0.00233	0.00234	0.00313	0.00337	0.00404	0.00405	0.00405	0.00353
Brunei		0.00912	0.00991	0.00803	0.00975	0.01093	0.01238	0.01088	0.01241	0.0126	0.01373	0.01441	0.02138	0.01452	0.01564	0.02179	0.02238	0.02594	0.02573	0.02481	0.02422	0.02423	0.02319	0.02301	0.02612	0.02647	0.02864	0.02893	0.03015	0.03467	0.03169	0.03336	0.03278	0.03043
Burma (Myanmar)		0.04824	0.04815	0.0504	0.05864	0.06175	0.06107	0.03614	0.03427	0.03494	0.03488	0.03203	0.03303	0.03462	0.03037	0.03962	0.03834	0.04139	0.05288	0.06241	0.07645	0.07674	0.07031	0.07213	0.07486	0.08377	0.08946	0.0831	0.08271	0.06185	0.05456	0.05396	0.05457	0.0553
Cambodia		0.00404	0.00424	0.00476	0.0052	0.00582	0.00589	0.00612	0.00616	0.0064	0.00638	0.00638	0.00655	0.00674	0.00673	0.0069	0.02041	0.02259	0.02683	0.0315	0.03218	0.03363	0.03947	0.04248	0.04618	0.05158	0.0546	0.05995	0.06463	0.07284	0.06238	0.0552	0.06938	0.0911
China		3.80808	3.66327	3.55887	3.69413	3.75086	4.04448	4.25727	4.51167	4.82176	5.04052	4.86378	5.28738	5.59055	4.78679	6.58761	7.00805	7.46479	8.12371	8.46609	9.01632	9.85521	10.126	10.6098	11.4564	13.159	13.7072	14.8598	15.3001	15.8411	17.5142	19.0946	20.0766	20.9412
Cook Islands		0.00042	0.00084	0.00082	0.00083	0.00083	0.00083	0.00076	0.00076	0.00076	0.00067	0.00067	0.00056	0.00067	0.00067	0.00067	0.00067	0.00067	0.00067	0.00067	0.00067	0.0008	0.0008	0.0008	0.0008	0.00089	0.00098	0.00103	0.00096	0.00103	0.00101	0.00101	0.00104	0.00209
Fiji		0.01481	0.01536	0.01494	0.01228	0.01105	0.01124	0.01367	0.01081	0.01121	0.01319	0.01423	0.0116	0.01195	0.01094	0.01316	0.01424	0.01476	0.01471	0.01432	0.01596	0.01945	0.02089	0.02502	0.0324	0.03568	0.03534	0.03707	0.03518	0.03048	0.01943	0.01899	0.01855	0.02087
French Polynesia		0.00312	0.00461	0.00624	0.00825	0.01246	0.01083	0.01359	0.01387	0.01375	0.01373	0.01304	0.01286	0.0124	0.01148	0.00981	0.01013	0.0101	0.01013	0.01013	0.01013	0.00954	0.00956	0.00993	0.01203	0.01187	0.01301	0.01413	0.01393	0.01537	0.01479	0.01522	0.01482	0.01482
Guam		0.05329	0.0745	0.05799	0.05546	0.01909	0.0094	0.01564	0.01085	0.01126	0.01071	0.02594	0.02942	0.0351	0.04637	0.06643	0.05038	0.04479	0.05113	0.0422	0.047	0.03928	0.04231	0.02882	0.0331	0.0263	0.02938	0.03058	0.02752	0.02333	0.01457	0.01304	0.01586	0.02506
Hawaiian Trade Zone		0.09468	0.10902	0.10042	0.09487	0.11496	0.1103	0.06534	--	--	--	--	--	--	--	--	--	--	--	--	--	--	--	--	--	--	--	--	--	--	--	--	--	--
Hong Kong		0.27275	0.28136	0.27167	0.25693	0.24745	0.23464	0.24286	0.24802	0.26072	0.2638	0.26901	0.28143	0.32101	0.30548	0.38171	0.39385	0.38595	0.39223	0.40661	0.56022	0.51987	0.52095	0.57926	0.58875	0.67637	0.70199	0.67784	0.69938	0.62781	0.75642	0.82471	0.78688	0.62427
India		1.37079	1.55294	1.55938	1.62787	1.73977	1.86769	1.99376	2.07397	2.28833	2.40798	2.44224	2.48668	2.66264	2.18576	2.94401	3.27834	3.48274	3.66835	3.87246	4.20568	4.39542	4.49716	4.70871	4.81656	4.95029	5.11508	5.55147	5.7075	6.0755	6.39516	6.64485	6.85837	6.97637
Indonesia		0.85392	0.94986	1.00201	0.98721	0.98964	0.97143	0.98532	1.03427	1.09668	1.21951	1.36451	1.45472	1.47928	1.47398	1.6188	1.68933	1.78495	1.97198	1.89021	2.0066	2.15618	2.23574	2.33955	2.36933	2.53847	2.63451	2.58706	2.51425	2.60769	2.65579	2.78692	2.72781	2.58382
Japan		10.361	10.0444	9.3773	8.97486	9.56993	9.04421	9.16818	9.2862	9.93268	10.3095	10.8663	11.0219	11.2205	10.9846	11.559	11.6017	11.7095	11.5899	11.175	11.44	11.2112	10.9482	10.7526	11.484	11.2829	11.2715	10.5228	10.6561	9.71601	8.84572	8.97575	9.03225	9.53228
Kiribati		0.00034	0.0004	0.0004	0.0004	0.00029	0.00029	0.00026	0.00031	0.00031	0.00031	0.00031	0.00037	0.00031	0.00031	0.00031	0.00031	0.00031	0.00031	0.00031	0.00031	0.00035	0.00035	0.00045	0.00045	0.00045	0.00054	0.00054	0.00057	0.00055	0.00087	0.00087	0.00083	0.00083
Korea, North		0.09996	0.10597	0.1079	0.11845	0.12529	0.13414	0.14183	0.14314	0.13567	0.13383	0.15307	0.16003	0.15436	0.14653	0.14455	0.13113	0.09915	0.08442	0.07429	0.06396	0.05465	0.04868	0.0533	0.05328	0.05206	0.04014	0.03072	0.03596	0.03628	0.02876	0.02749	0.03018	0.03228
Korea, South		1.17736	1.16864	1.15883	1.21237	1.1936	1.17794	1.25518	1.32092	1.57678	1.80984	2.2021	2.65485	3.21145	3.52576	3.85281	4.19978	4.39583	4.7103	3.98289	4.3233	4.43753	4.41895	4.54662	4.60211	4.57173	4.63586	4.61167	4.73989	4.40035	4.47911	4.61099	4.56739	4.64553
Laos		0.00604	0.0024	0.00221	0.00236	0.00217	0.00245	0.00302	0.00306	0.00305	0.00338	0.00338	0.0037	0.00401	0.00302	0.00434	0.00456	0.00486	0.0051	0.00542	0.00542	0.0054	0.00542	0.00564	0.00582	0.0057	0.006	0.0061	0.00612	0.00675	0.00624	0.00624	0.00592	0.00682
Macau		0.00687	0.00653	0.00696	0.00983	0.01076	0.00877	0.01226	0.0137	0.01361	0.01457	0.01477	0.0148	0.01525	0.01576	0.01798	0.01755	0.02025	0.0208	0.02244	0.02382	0.02174	0.02301	0.02519	0.02621	0.03192	0.02738	0.0319	0.03196	0.01757	0.02553	0.02118	0.02521	0.04011
Malaysia		0.34314	0.35283	0.38311	0.4067	0.40965	0.41189	0.40646	0.41244	0.42546	0.45713	0.55456	0.58494	0.62351	0.58487	0.78773	0.82889	0.9057	0.94234	0.92301	0.92186	0.94266	0.96395	0.93371	0.96813	1.02139	1.04785	1.06986	1.09772	1.41938	1.16506	1.18371	1.19677	1.06696
Maldives		0.00021	0.00021	0.00021	0.00021	0.00083	0.0009	0.00114	0.00114	0.00123	0.00123	0.00136	0.00136	0.00141	0.00171	0.00342	0.00483	0.0049	0.00433	0.00468	0.00468	0.00663	0.00713	0.01307	0.0147	0.01027	0.00823	0.01136	0.01279	0.01323	0.01459	0.01459	0.01471	0.01537
Mongolia		0.02519	0.02513	0.02942	0.02936	0.0316	0.03475	0.03506	0.03569	0.0366	0.03414	0.03232	0.03003	0.02718	0.02561	0.02681	0.02373	0.02454	0.01623	0.01715	0.0175	0.01722	0.01991	0.02158	0.02088	0.02479	0.0256	0.02811	0.03128	0.03853	0.03356	0.0355	0.03887	0.04759
Nauru		0.0019	0.00192	0.00192	0.00192	0.00198	0.00197	0.00197	0.00197	0.00196	0.00197	0.00205	0.00205	0.00209	0.00209	0.0021	0.00214	0.00213	0.00214	0.00214	0.00214	0.00213	0.00214	0.00223	0.00223	0.00226	0.00231	0.00226	0.0023	0.00221	0.00237	0.00237	0.00221	0.00221
Nepal		0.00419	0.00418	0.00625	0.00625	0.00628	0.00513	0.00785	0.00851	0.00828	0.0086	0.00837	0.01076	0.01204	0.0121	0.01423	0.0151	0.01889	0.02284	0.02935	0.03156	0.03048	0.03098	0.03136	0.03152	0.0324	0.03355	0.0335	0.03315	0.03659	0.03903	0.04273	0.03895	0.03678
New Caledonia		0.02197	0.02186	0.01513	0.0127	0.01508	0.01363	0.01421	0.01567	0.01457	0.01608	0.01644	0.01795	0.01881	0.01832	0.01835	0.01835	0.01873	0.01878	0.01891	0.01891	0.01869	0.01874	0.02189	0.02189	0.02494	0.02491	0.03032	0.03074	0.02931	0.03172	0.03172	0.0327	0.03129
New Zealand		0.18739	0.17322	0.16637	0.1649	0.17245	0.16527	0.16659	0.18106	0.18976	0.19916	0.2119	0.20536	0.2187	0.21788	0.24089	0.24693	0.24771	0.25514	0.25707	0.26114	0.26711	0.2666	0.2858	0.29896	0.31079	0.31404	0.31876	0.33003	0.32007	0.30817	0.30771	0.30195	0.309
Niue		4e-05	4e-05	4e-05	4e-05	4e-05	4e-05	4e-05	4e-05	4e-05	4e-05	4e-05	4e-05	4e-05	4e-05	4e-05	4e-05	4e-05	4e-05	4e-05	4e-05	4e-05	4e-05	4e-05	4e-05	4e-05	6e-05	7e-05	7e-05	5e-05	5e-05	5e-05	4e-05	4e-05
Pakistan		0.2188	0.23782	0.28087	0.28849	0.29747	0.33894	0.35275	0.38421	0.41263	0.43766	0.46812	0.47189	0.48572	0.51465	0.60879	0.64361	0.7093	0.72094	0.75488	0.80041	0.79502	0.77971	0.77054	0.71714	0.69565	0.71692	0.76322	0.81918	0.82679	0.84007	0.84311	0.89834	0.94585
Papua New Guinea		0.02578	0.02571	0.02571	0.02571	0.02926	0.03077	0.03111	0.03453	0.03223	0.03305	0.03353	0.03324	0.033	0.03237	0.03222	0.03263	0.03255	0.03321	0.03189	0.03189	0.03211	0.0322	0.0473	0.0542	0.05397	0.05411	0.05583	0.05567	0.04188	0.04193	0.04232	0.04252	0.04262
Philippines		0.48068	0.45254	0.44542	0.42257	0.35602	0.3217	0.33852	0.4035	0.41707	0.48921	0.50078	0.49931	0.55262	0.55181	0.63726	0.69461	0.7202	0.771	0.8014	0.77166	0.7319	0.71874	0.69656	0.68646	0.69423	0.69239	0.68096	0.64316	0.6369	0.59883	0.62819	0.64191	0.61404
Samoa		0.00138	0.00146	0.00158	0.00158	0.00206	0.00163	0.00163	0.00163	0.00163	0.00172	0.00181	0.00181	0.00185	0.00185	0.00177	0.0019	0.00189	0.0019	0.0019	0.0019	0.00198	0.00199	0.00207	0.00207	0.00215	0.00229	0.00225	0.00229	0.00239	0.00233	0.00233	0.00223	0.00223
Singapore		0.4419	0.46282	0.49048	0.48734	0.5138	0.49771	0.57183	0.63337	0.67594	0.73237	0.80168	0.85452	0.92793	0.90608	1.11215	1.12973	1.2962	1.3953	1.444	1.4298	1.46618	1.56739	1.54895	1.48499	1.64865	1.78938	1.83558	1.9399	2.13516	2.59286	3.05761	2.76944	2.62672
Solomon Islands		0.00147	0.00208	0.00189	0.00209	0.0021	0.00183	0.00184	0.00212	0.00233	0.00242	0.00247	0.00247	0.00242	0.00223	0.00234	0.00242	0.00242	0.00242	0.00242	0.00242	0.0025	0.00251	0.0026	0.0026	0.00267	0.00294	0.00273	0.00303	0.00304	0.00273	0.003	0.00307	0.00372
Sri Lanka		0.07304	0.07302	0.07505	0.07683	0.08409	0.07022	0.06742	0.07752	0.07248	0.06636	0.07318	0.073	0.07737	0.08006	0.09444	0.10094	0.11266	0.12642	0.12814	0.13756	0.15692	0.15449	0.16067	0.16425	0.16896	0.18242	0.17604	0.18152	0.1816	0.18315	0.17001	0.18725	0.19115
Taiwan		0.8165	0.72572	0.70337	0.71666	0.814	0.7934	0.85595	0.88385	1.02485	1.10818	1.14691	1.15368	1.17104	1.01009	1.39078	1.55996	1.64068	1.63892	1.69912	1.79252	1.82608	1.85194	1.86848	1.94401	1.97063	1.94841	1.99332	1.91505	1.88543	1.91421	2.02506	2.14592	2.24997
Thailand		0.47537	0.45214	0.41563	0.44495	0.48518	0.46981	0.4849	0.53517	0.58463	0.72325	0.84606	0.91241	0.99538	1.03814	1.26342	1.42273	1.56472	1.62813	1.52943	1.52413	1.49151	1.43368	1.56253	1.71541	1.88101	1.96358	1.92565	1.92233	1.54671	1.97612	1.98397	2.00253	1.98097
Timor-Leste (East Timor)		--	--	--	--	--	--	--	--	--	--	--	--	--	--	--	--	--	--	--	--	--	--	--	0.0023	0.0025	0.00249	0.00254	0.00462	0.00278	0.00262	0.00262	0.0027	0.00411
Tonga		0.00043	0.00064	0.00059	0.00064	0.00064	0.00066	0.00066	0.00097	0.00115	0.00125	0.00125	0.00142	0.00141	0.00141	0.00165	0.00165	0.00183	0.00188	0.00183	0.00183	0.00187	0.00178	0.00159	0.00159	0.00171	0.00208	0.00246	0.00252	0.00255	0.00252	0.00252	0.00252	0.00261
U.S. Pacific Islands		0.00219	0.00218	0.00218	0.00218	0.00206	0.00186	0.00186	0.00186	0.00255	0.00394	0.00407	0.00407	0.0041	0.00392	0.00403	0.00416	0.00423	0.00416	0.00416	0.00416	0.00415	0.00416	0.00416	0.00416	0.00413	0.00414	0.00424	0.00432	0.00507	0.00424	0.00496	0.00411	0.00398
Vanuatu		0.00172	0.0015	0.00151	0.00147	0.00154	0.00167	0.00167	0.0016	0.00189	0.00168	0.00177	0.00139	0.00092	0.00087	0.00092	0.00092	0.00092	0.00092	0.00092	0.00092	0.00118	0.00118	0.00127	0.00127	0.00131	0.0014	0.00136	0.00158	0.00143	0.00175	0.00175	0.00209	0.00232
Vietnam		0.05092	0.05554	0.05521	0.05647	0.05749	0.05918	0.06088	0.07382	0.08501	0.09847	0.1113	0.11732	0.12828	0.15946	0.17876	0.19864	0.24327	0.26748	0.28301	0.33115	0.36488	0.36996	0.40607	0.44425	0.49392	0.5056	0.51123	0.56173	0.62109	0.59165	0.6452	0.73511	0.78118
Wake Island		0.01857	0.01852	0.01852	0.01852	0.01874	0.01838	0.01843	0.01843	0.01824	0.01829	0.01784	0.01784	0.01806	0.01625	0.01823	0.01841	0.01845	0.01861	0.01861	0.01861	0.0187	0.01875	0.01907	0.01907	0.01896	0.01888	0.01937	0.01986	0.01925	0.01932	0.01916	0.019	0.01843
World		131.137	125.943	122.665	120.847	123.153	123.071	127.23	129.624	133.608	135.399	136.207	137.341	138.001	128.389	140.21	142.505	145.913	149.183	150.568	153.701	156.133	157.089	158.493	162.183	168.643	170.809	170.985	174.228	172.766	170.154	174.861	176.759	177.746
