# Supplementary material
Source: MDPI journal article supplement (https://www.mdpi.com/1099-4300/15/12/5565)
Supplement: s2 [file s2 › Sources/Raw Data/Total_Primary_Coal_Production_(Quadrillion_Btu).xls]

## Sheet: Data3
Table: Total Primary Coal Production (Quadrillion Btu)
		1981	1982	1983	1984	1985	1986	1987	1988	1989	1990	1991	1992	1993	1994	1995	1996	1997	1998	1999	2000	2001	2002	2003	2004	2005	2006	2007	2008	2009	2010	2011
Bermuda		0	0	0	0	0	0	0	0	0	0	0	0	0	0	0	0	0	0	0	0	0	0	0	0	0	0	0	0	0	0	0
Canada		0.98039	1.04664	1.0938	1.40155	1.49619	1.41233	1.5013	1.72556	1.73891	1.69799	1.77762	1.62114	1.71099	1.82597	1.89756	1.92001	2.08501	1.98172	1.90749	1.81928	1.62206	1.52703	1.4266	1.51202	1.50191	1.52434	1.6065	1.57307	1.44724	1.57307	1.55934
Greenland		0	0	0	0	0	0	0	0	0	0	0	0	0	0	0	0	0	0	0	0	0	0	0	0	0	0	0	0	0	0	0
Mexico		0.0763	0.09177	0.11654	0.12697	0.13025	0.14109	0.17132	0.15295	0.16432	0.16618	0.1509	0.14015	0.15171	0.15755	0.16368	0.1854	0.20063	0.21063	0.1939	0.21604	0.22485	0.21212	0.18537	0.19083	0.20769	0.22183	0.24166	0.22073	0.2037	0.19516	0.23915
Saint Pierre and Miquelon		0	0	0	0	0	0	0	0	0	0	0	0	0	0	0	0	0	0	0	0	0	0	0	0	0	0	0	0	0	0	0
United States		18.3768	18.6388	17.2467	19.7192	19.3252	19.5095	20.1411	20.7376	21.3602	22.4875	21.6364	21.6941	20.3357	22.2021	22.1295	22.7902	23.3096	24.0452	23.2951	22.7355	23.5471	22.7322	22.0937	22.8521	23.1852	23.7895	23.4927	23.8514	21.6237	22.0382	22.1809
Antarctica		0	0	0	0	0	0	0	0	0	0	0	0	0	0	0	0	0	0	0	0	0	0	0	0	0	0	0	0	0	0	0
Antigua and Barbuda		0	0	0	0	0	0	0	0	0	0	0	0	0	0	0	0	0	0	0	0	0	0	0	0	0	0	0	0	0	0	0
Argentina		0.01067	0.01103	0.01041	0.01088	0.00857	0.0078	0.00799	0.01097	0.01103	0.00594	0.00626	0.00497	0.00411	0.00855	0.0075	0.00764	0.00615	0.0071	0.00825	0.00637	0.00458	0.00237	0.00219	0.00125	0.00061	0.00347	0.0027	0.00228	0.00202	0.0016	0.00199
Aruba		--	--	--	--	--	0	0	0	0	0	0	0	0	0	0	0	0	0	0	0	0	0	0	0	0	0	0	0	0	0	0
Bahamas, The		0	0	0	0	0	0	0	0	0	0	0	0	0	0	0	0	0	0	0	0	0	0	0	0	0	0	0	0	0	0	0
Barbados		0	0	0	0	0	0	0	0	0	0	0	0	0	0	0	0	0	0	0	0	0	0	0	0	0	0	0	0	0	0	0
Belize		0	0	0	0	0	0	0	0	0	0	0	0	0	0	0	0	0	0	0	0	0	0	0	0	0	0	0	0	0	0	0
Bolivia		0	0	0	0	0	0	0	0	0	0	0	0	0	0	0	0	0	0	0	0	0	0	0	0	0	0	0	0	0	0	0
Brazil		0.09673	0.1075	0.11297	0.12698	0.12674	0.1209	0.10889	0.11759	0.10221	0.06485	0.073	0.06277	0.06284	0.06852	0.06534	0.06003	0.06958	0.06743	0.06946	0.08694	0.07287	0.06528	0.05992	0.07037	0.07995	0.07481	0.07676	0.0876	0.07472	0.06974	0.0696
Cayman Islands		0	0	0	0	0	0	0	0	0	0	0	0	0	0	0	0	0	0	0	0	0	0	0	0	0	0	0	0	0	0	0
Chile		0.02843	0.02574	0.02714	0.03281	0.03867	0.04097	0.04292	0.05275	0.05338	0.05979	0.06047	0.04453	0.03711	0.03237	0.02797	0.02705	0.02953	0.02662	0.01372	0.01035	0.01629	0.01225	0.01629	0.00659	0.01539	0.01907	0.00687	0.01887	0.01799	0.01751	0.0185
Colombia		0.11158	0.11409	0.13395	0.1711	0.22858	0.27459	0.34724	0.3887	0.47296	0.52807	0.51579	0.56514	0.54754	0.53206	0.60424	0.70577	0.88264	0.91403	0.88703	1.03295	1.17645	1.07059	1.35485	1.45409	1.59954	1.77644	1.89306	1.99055	1.97173	2.01352	2.32368
Costa Rica		0	0	0	0	0	0	0	0	0	0	0	0	0	0	0	0	0	0	0	0	0	0	0	0	0	0	0	0	0	0	0
Cuba		0	0	0	0	0	0	0	0	0	0	0	0	0	0	0	0	0	0	0	0	0	0	0	0	0	0	0	0	0	0	0
Dominica		0	0	0	0	0	0	0	0	0	0	0	0	0	0	0	0	0	0	0	0	0	0	0	0	0	0	0	0	0	0	0
Dominican Republic		0	0	0	0	0	0	0	0	0	0	0	0	0	0	0	0	0	0	0	0	0	0	0	0	0	0	0	0	0	0	0
Ecuador		0	0	0	0	0	0	0	0	0	0	0	0	0	0	0	0	0	0	0	0	0	0	0	0	0	0	0	0	0	0	0
El Salvador		0	0	0	0	0	0	0	0	0	0	0	0	0	0	0	0	0	0	0	0	0	0	0	0	0	0	0	0	0	0	0
Falkland Islands (Islas Malvinas)		0	0	0	0	0	0	0	0	0	0	0	0	0	0	0	0	0	0	0	0	0	0	0	0	0	0	0	0	0	0	0
French Guiana		0	0	0	0	0	0	0	0	0	0	0	0	0	0	0	0	0	0	0	0	0	0	0	0	0	0	0	0	0	0	0
Grenada		0	0	0	0	0	0	0	0	0	0	0	0	0	0	0	0	0	0	0	0	0	0	0	0	0	0	0	0	0	0	0
Guadeloupe		0	0	0	0	0	0	0	0	0	0	0	0	0	0	0	0	0	0	0	0	0	0	0	0	0	0	0	0	0	0	0
Guatemala		0	0	0	0	0	0	0	0	0	0	0	0	0	0	0	0	0	0	0	0	0	0	0	0	0	0	0	0	0	0	0
Guyana		0	0	0	0	0	0	0	0	0	0	0	0	0	0	0	0	0	0	0	0	0	0	0	0	0	0	0	0	0	0	0
Haiti		0	0	0	0	0	0	0	0	0	0	0	0	0	0	0	0	0	0	0	0	0	0	0	0	0	0	0	0	0	0	0
Honduras		0	0	0	0	0	0	0	0	0	0	0	0	0	0	0	0	0	0	0	0	0	0	0	0	0	0	0	0	0	0	0
Jamaica		0	0	0	0	0	0	0	0	0	0	0	0	0	0	0	0	0	0	0	0	0	0	0	0	0	0	0	0	0	0	0
Martinique		0	0	0	0	0	0	0	0	0	0	0	0	0	0	0	0	0	0	0	0	0	0	0	0	0	0	0	0	0	0	0
Montserrat		0	0	0	0	0	0	0	0	0	0	0	0	0	0	0	0	0	0	0	0	0	0	0	0	0	0	0	0	0	0	0
Netherlands Antilles		0	0	0	0	0	0	0	0	0	0	0	0	0	0	0	0	0	0	0	0	0	0	0	0	0	0	0	0	0	0	0
Nicaragua		0	0	0	0	0	0	0	0	0	0	0	0	0	0	0	0	0	0	0	0	0	0	0	0	0	0	0	0	0	0	0
Panama		0	0	0	0	0	0	0	0	0	0	0	0	0	0	0	0	0	0	0	0	0	0	0	0	0	0	0	0	0	0	0
Paraguay		0	0	0	0	0	0	0	0	0	0	0	0	0	0	0	0	0	0	0	0	0	0	0	0	0	0	0	0	0	0	0
Peru		0.00225	0.00176	0.00225	0.00257	0.00319	0.00372	0.00272	0.00302	0.00258	0.00208	0.00122	0.00184	0.00178	0.00135	0.0011	0.00044	0.00064	0.00061	0.00063	0.00049	0.00055	0.00064	0.00046	0.00048	0.00124	0.00299	0.00312	0.00388	0.00424	0.00268	0.00287
Puerto Rico		0	0	0	0	0	0	0	0	0	0	0	0	0	0	0	0	0	0	0	0	0	0	0	0	0	0	0	0	0	0	0
Saint Kitts and Nevis		0	0	0	0	0	0	0	0	0	0	0	0	0	0	0	0	0	0	0	0	0	0	0	0	0	0	0	0	0	0	0
Saint Lucia		0	0	0	0	0	0	0	0	0	0	0	0	0	0	0	0	0	0	0	0	0	0	0	0	0	0	0	0	0	0	0
Saint Vincent/Grenadines		0	0	0	0	0	0	0	0	0	0	0	0	0	0	0	0	0	0	0	0	0	0	0	0	0	0	0	0	0	0	0
Suriname		0	0	0	0	0	0	0	0	0	0	0	0	0	0	0	0	0	0	0	0	0	0	0	0	0	0	0	0	0	0	0
Trinidad and Tobago		0	0	0	0	0	0	0	0	0	0	0	0	0	0	0	0	0	0	0	0	0	0	0	0	0	0	0	0	0	0	0
Turks and Caicos Islands		0	0	0	0	0	0	0	0	0	0	0	0	0	0	0	0	0	0	0	0	0	0	0	0	0	0	0	0	0	0	0
Uruguay		0	0	0	0	0	0	0	0	0	0	0	0	0	0	0	0	0	0	0	0	0	0	0	0	0	0	0	0	0	0	0
Venezuela		0.00132	0.00137	0.001	0.00137	0.00113	0.00153	0.00167	0.02932	0.05716	0.0589	0.05851	0.06458	0.10058	0.11278	0.10715	0.09593	0.15652	0.22677	0.21227	0.23981	0.23071	0.22412	0.20703	0.20524	0.21882	0.23945	0.18543	0.14971	0.09981	0.08303	0.06907
Virgin Islands, U.S.		0	0	0	0	0	0	0	0	0	0	0	0	0	0	0	0	0	0	0	0	0	0	0	0	0	0	0	0	0	0	0
Virgin Islands, British		0	0	0	0	0	0	0	0	0	0	0	0	0	0	0	0	0	0	0	0	0	0	0	0	0	0	0	0	0	0	0
Albania		0.01437	0.01586	0.01726	0.01875	0.02006	0.02022	0.01991	0.02037	0.02046	0.01931	0.01014	0.00341	0.002	0.00158	0.00075	0.00105	0.00038	0.00048	0.00048	0.00029	0.00021	0.00075	0.00079	0.00079	0.00063	0.00063	0.00063	0.00083	0.00014	0.00014	0.00022
Austria		0.03541	0.03813	0.03517	0.03387	0.03564	0.03434	0.03222	0.02463	0.0239	0.02831	0.02407	0.0183	0.01747	0.01414	0.01341	0.01145	0.01227	0.01249	0.01107	0.01218	0.01178	0.0138	0.01126	0.0023	0	0	0	0	0	0	0
Belgium		0.26251	0.26487	0.23335	0.24627	0.24442	0.212	0.15777	0.08225	0.08398	0.0464	0.03961	0.0225	0.01825	0.0126	0.01212	0.00987	0.00914	0.00771	0.01015	0.01094	0.00636	0.00458	0.00344	0.00482	0.0029	0.00075	0	0	0	0	0
Bosnia and Herzegovina		--	--	--	--	--	--	--	--	--	--	--	0.13158	0.11404	0.01228	0.01382	0.02363	0.07653	0.09706	0.09514	0.12471	0.12474	0.13665	0.14719	0.14595	0.1484	0.16219	0.15893	0.183	0.18667	0.17547	0.17813
Bulgaria		0.21941	0.24115	0.24249	0.25142	0.23102	0.26264	0.2742	0.25453	0.25558	0.23539	0.1876	0.18664	0.17765	0.17681	0.19168	0.20428	0.20484	0.20743	0.17659	0.1843	0.18549	0.18106	0.18892	0.18279	0.16993	0.17701	0.19624	0.19865	0.18758	0.20262	0.26158
Croatia		--	--	--	--	--	--	--	--	--	--	--	0.00388	0.00351	0.00319	0.00205	0.00172	0.00121	0.00139	0.00045	0	0	0	0	0	0	0	0	0	0	0	0
Cyprus		0	0	0	0	0	0	0	0	0	0	0	0	0	0	0	0	0	0	0	0	0	0	0	0	0	0	0	0	0	0	0
Czech Republic		--	--	--	--	--	--	--	--	--	--	--	--	1.02534	0.93171	0.8881	0.93236	0.71518	0.66216	0.57359	0.62653	0.6381	0.61783	0.59774	0.57852	0.58019	0.58814	0.73514	0.71104	0.65224	0.64918	0.64233
Denmark		0	0	0	0	0	0	0	0	0	0	0	0	0	0	0	0	0	0	0	0	0	0	0	0	0	0	0	0	0	0	0
Faroe Islands		0	0	0	0	0	0	0	0	0	0	0	0	0	0	0	0	0	0	0	0	0	0	0	0	0	0	0	0	0	0	0
Finland		0	0	0	0	0	0	0	0	0	0	0	0	0	0	0	0	0	0	0	0	0	0	0	0	0	0	0	0	0	0	0
Former Czechoslovakia		1.51044	1.53698	1.5856	1.61948	1.58645	1.58148	1.57841	1.55007	1.4777	1.31659	1.22446	1.14264	--	--	--	--	--	--	--	--	--	--	--	--	--	--	--	--	--	--	--
Former Serbia and Montenegro		--	--	--	--	--	--	--	--	--	--	--	0.33974	0.32436	0.29686	0.23569	0.37736	0.38094	0.39085	0.29309	0.35913	0.36073	0.37934	0.39802	0.40074	0.36323	--	--	--	--	--	--
Former Yugoslavia		0.62784	0.66098	0.71815	0.78683	0.84477	0.8545	0.8542	0.8603	0.88041	0.88325	0.81349	--	--	--	--	--	--	--	--	--	--	--	--	--	--	--	--	--	--	--	--
France		0.514	0.48878	0.48663	0.47326	0.42697	0.41096	0.39254	0.34485	0.33291	0.30847	0.29452	0.27136	0.24952	0.21981	0.20928	0.20742	0.17117	0.1417	0.12673	0.08692	0.0565	0.04087	0.04491	0.00414	0	0	0	0	0	0	0
Germany		--	--	--	--	--	--	--	--	--	--	3.96327	3.64907	3.36996	3.20716	3.09165	2.79093	2.8214	2.58534	2.4983	2.45176	2.34414	2.36	2.32448	2.36159	2.29781	2.1815	2.22897	2.05993	1.88324	1.85846	1.90325
Germany, East		2.24634	2.3247	2.34095	2.49568	2.62887	2.62133	2.60209	2.61336	2.53541	2.35806	--	--	--	--	--	--	--	--	--	--	--	--	--	--	--	--	--	--	--	--	--
Germany, West		3.3089	3.31878	3.16174	3.07738	3.1202	3.03183	2.87542	2.79954	2.7586	2.71296	--	--	--	--	--	--	--	--	--	--	--	--	--	--	--	--	--	--	--	--	--
Gibraltar		0	0	0	0	0	0	0	0	0	0	0	0	0	0	0	0	0	0	0	0	0	0	0	0	0	0	0	0	0	0	0
Greece		0.16392	0.16442	0.18359	0.19504	0.21536	0.22861	0.26772	0.28999	0.31125	0.31143	0.31622	0.2718	0.2985	0.29391	0.29785	0.28534	0.32117	0.33865	0.3348	0.34257	0.34967	0.3576	0.3466	0.34931	0.3461	0.3231	0.33069	0.32776	0.32363	0.28188	0.29308
Hungary		0.2575	0.25929	0.24977	0.24732	0.23512	0.22782	0.22595	0.20678	0.19873	0.17402	0.16704	0.15492	0.12593	0.12145	0.12105	0.12732	0.13744	0.12686	0.12516	0.1205	0.11768	0.11181	0.11416	0.09536	0.08118	0.08442	0.08328	0.07977	0.07623	0.0773	0.08105
Iceland		0	0	0	0	0	0	0	0	0	0	0	0	0	0	0	0	0	0	0	0	0	0	0	0	0	0	0	0	0	0	0
Ireland		0.00188	0.00169	0.00205	0.00191	0.00156	0.00147	0.00123	0.00115	0.00117	0.00068	3e-05	3e-05	3e-05	0	2e-05	2e-05	0	0	0	0	0	0	0	0	0	0	0	0	0	0	0
Italy		0.01215	0.019	0.01746	0.01783	0.0192	0.0103	0.00986	0.01092	0.01176	0.01093	0.00985	0.00984	0.0064	0.00258	0.00158	0.00063	0.00104	0.00091	0.00056	7e-05	0.00369	0.00431	0.00661	0.00259	0.00251	0.00056	0.00418	0.0031	0.0019	0.00267	0.00243
Luxembourg		0	0	0	0	0	0	0	0	0	0	0	0	0	0	0	0	0	0	0	0	0	0	0	0	0	0	0	0	0	0	0
Macedonia		--	--	--	--	--	--	--	--	--	--	--	0.06104	0.06051	0.06001	0.06341	0.0625	0.06574	0.07222	0.06514	0.05042	0.05437	0.05369	0.05229	0.05132	0.04874	0.04702	0.0461	0.05404	0.0526	0.04763	0.04221
Malta		0	0	0	0	0	0	0	0	0	0	0	0	0	0	0	0	0	0	0	0	0	0	0	0	0	0	0	0	0	0	0
Montenegro		--	--	--	--	--	--	--	--	--	--	--	--	--	--	--	--	--	--	--	--	--	--	--	--	--	0.01338	0.01065	0.0154	0.00847	0.01715	0.01715
Netherlands		0	0	0	0	0	0	0	0	0	0	0	0	0	0	0	0	0	0	0	0	0	0	0	0	0	0	0	0	0	0	0
Norway		0.01092	0.01172	0.01343	0.01202	0.01351	0.01164	0.01063	0.00703	0.00959	0.00807	0.00879	0.00956	0.00714	0.00802	0.00778	0.00613	0.01079	0.00917	0.0113	0.01767	0.05	0.05962	0.08233	0.08121	0.04114	0.06698	0.1139	0.09592	0.07386	0.05411	0.03876
Poland		3.86273	4.46133	4.53372	4.59765	4.64836	4.72213	4.78279	4.77819	4.42575	3.73329	3.57961	3.51939	3.49749	3.55476	3.41575	3.65505	3.65367	3.16828	3.32008	2.85573	2.85677	2.8587	2.84045	2.79282	2.71938	2.65149	2.46506	2.39827	2.23665	2.20203	2.24305
Portugal		0.00299	0.0029	0.00301	0.00316	0.00387	0.00384	0.00424	0.00374	0.0042	0.00386	0.00372	0.00304	0.00271	0.00202	0	0	0	0	0	0	0	0	0	0	0	0	0	0	0	0	0
Romania		0.36623	0.37546	0.44157	0.43904	0.4421	0.44981	0.48442	0.53983	0.54258	0.33114	0.28156	0.30307	0.29442	0.30148	0.30277	0.32938	0.25952	0.20179	0.1901	0.23294	0.26159	0.2378	0.25845	0.24921	0.24352	0.27316	0.27971	0.28029	0.26548	0.24323	0.27547
Serbia		--	--	--	--	--	--	--	--	--	--	--	--	--	--	--	--	--	--	--	--	--	--	--	--	--	0.36765	0.37064	0.39068	0.39427	0.38989	0.41503
Slovakia		--	--	--	--	--	--	--	--	--	--	--	--	0.04188	0.04291	0.04367	0.04449	0.04776	0.0482	0.04257	0.04242	0.04083	0.03876	0.03526	0.03253	0.02767	0.02426	0.02326	0.0267	0.02835	0.02621	0.02618
Slovenia		--	--	--	--	--	--	--	--	--	--	--	0.06121	0.05602	0.05179	0.05951	0.05699	0.05705	0.0553	0.05563	0.05419	0.05009	0.05727	0.05836	0.0572	0.05422	0.05397	0.05271	0.05265	0.052	0.05079	0.05173
Spain		0.52944	0.58876	0.60346	0.59488	0.59758	0.57939	0.51496	0.49025	0.53346	0.52573	0.49325	0.49183	0.46199	0.44604	0.34965	0.33658	0.34245	0.32992	0.38581	0.35137	0.35464	0.33927	0.31855	0.31391	0.3008	0.28844	0.27108	0.20289	0.18952	0.16864	0.13241
Sweden		0.00064	0.0003	0.0003	0.0003	0.00027	0.00027	0.00057	0.00068	0.00046	0.00025	0.00064	0.00095	0.0001	1e-05	0	0	0	0	0	0	0	0	0	0	0	0	0	0	0	0	0
Switzerland		0	0	0	0	0	0	0	0	0	0	0	0	0	0	0	0	0	0	0	0	0	0	0	0	0	0	0	0	0	0	0
Turkey		0.23917	0.25852	0.27559	0.31339	0.40382	0.46136	0.46626	0.39908	0.50481	0.44767	0.43485	0.4851	0.46823	0.47038	0.4655	0.47372	0.53544	0.57222	0.54898	0.55031	0.53107	0.48501	0.43941	0.42351	0.54239	0.59143	0.69361	0.72892	0.73666	0.68093	0.72195
United Kingdom		3.19766	3.12393	2.99155	1.2808	2.35072	2.70365	2.61111	2.60354	2.52854	2.36072	2.37378	1.95217	1.56733	1.12308	1.14032	1.15809	1.19029	0.9919	0.89635	0.71643	0.77848	0.72982	0.68565	0.60608	0.49438	0.44663	0.40856	0.43484	0.42916	0.44004	0.4419
Armenia		--	--	--	--	--	--	--	--	--	--	--	0	0	0	0	0	0	0	0	0	0	0	0	0	0	0	0	0	0	0	0
Azerbaijan		--	--	--	--	--	--	--	--	--	--	--	0	0	0	0	0	0	0	0	0	0	0	0	0	0	0	0	0	0	0	0
Belarus		--	--	--	--	--	--	--	--	--	--	--	0	0	0	0	0	0	0	0	0	0	0	0	0	0	0	0	0	0	0	0
Estonia		--	--	--	--	--	--	--	--	--	--	--	0.17354	0.10058	0.10136	0.09119	0.13546	0.11203	0.10385	0.08905	0.09772	0.09864	0.10333	0.12409	0.1166	0.12158	0.11745	0.13786	0.1343	0.12448	0.14943	0.15611
Former U.S.S.R.		11.8876	12.0756	12.0019	12.1329	12.3446	12.7456	12.8929	13.058	12.5276	13.6749	10.6512	--	--	--	--	--	--	--	--	--	--	--	--	--	--	--	--	--	--	--	--
Georgia		--	--	--	--	--	--	--	--	--	--	--	0.00262	0.00278	0.00342	0.0006	0.00028	8e-05	0.00022	0.0003	0.00013	2e-05	0.00011	0.00015	0.00015	9e-05	0.00017	0.00026	0.0002	0.00281	0.00194	0.00135
Kazakhstan		--	--	--	--	--	--	--	--	--	--	--	2.31012	2.05488	1.45338	1.17383	1.19376	1.05937	1.0328	1.09874	1.42198	1.45236	1.35651	1.55694	1.59344	1.59508	1.76919	1.79181	2.03511	1.84497	2.02267	2.13431
Kyrgyzstan		--	--	--	--	--	--	--	--	--	--	--	0.02952	0.02272	0.0115	0.00639	0.00615	0.00761	0.00639	0.00646	0.0066	0.00736	0.00712	0.00632	0.00682	0.00508	0.00486	0.0059	0.00739	0.00904	0.00874	0.01271
Latvia		--	--	--	--	--	--	--	--	--	--	--	0	0	0	0	0	0	0	0	0	0	0	0	0	0	0	0	0	0	0	0
Lithuania		--	--	--	--	--	--	--	--	--	--	--	0	0	0	0	0	0	0	0	0	0	0	0	0	0	0	0	0	0	0	0
Moldova		--	--	--	--	--	--	--	--	--	--	--	0.00483	0.00332	0.00206	0.00059	0.00055	0.0007	0.00012	0	0	0	0	0	0	0	0	0	0	0	0	0
Russia		--	--	--	--	--	--	--	--	--	--	--	5.38686	4.88431	4.38264	4.25769	4.30644	3.91807	3.7378	4.77354	4.85566	4.83479	4.88797	5.29079	5.40675	5.91975	5.9547	6.0766	6.36042	6.60978	6.87379	7.05002
Tajikistan		--	--	--	--	--	--	--	--	--	--	--	0.00377	0.00306	0.00187	0.0006	0.00035	0.00031	0.00035	0.00035	0.00041	0.00044	0.00067	0.00087	0.00172	0.00183	0.00194	0.00335	0.00368	0.00374	0.0037	0.0037
Turkmenistan		--	--	--	--	--	--	--	--	--	--	--	0	0	0	0	0	0	0	0	0	0	0	0	0	0	0	0	0	0	0	0
Ukraine		--	--	--	--	--	--	--	--	--	--	--	2.23605	1.91708	1.54061	1.6576	1.27776	1.25113	1.27296	1.34349	1.335	1.31953	1.31708	1.37645	1.29633	1.31407	1.34312	1.27889	1.29451	1.20231	1.20098	1.34226
Uzbekistan		--	--	--	--	--	--	--	--	--	--	--	0.0654	0.0536	0.05394	0.04346	0.03968	0.04321	0.04289	0.04358	0.03773	0.03953	0.03991	0.0279	0.04093	0.04514	0.0476	0.05082	0.04875	0.05368	0.04896	0.04226
Bahrain		0	0	0	0	0	0	0	0	0	0	0	0	0	0	0	0	0	0	0	0	0	0	0	0	0	0	0	0	0	0	0
Iran		0.02024	0.03247	0.02967	0.03588	0.0362	0.03649	0.03586	0.03643	0.0347	0.03181	0.02591	0.02808	0.02802	0.03739	0.03161	0.03258	0.031	0.03152	0.03003	0.02942	0.02501	0.02644	0.02929	0.03085	0.03987	0.0423	0.04266	0.04074	0.02952	0.02626	0.03008
Iraq		0	0	0	0	0	0	0	0	0	0	0	0	0	0	0	0	0	0	0	0	0	0	0	0	0	0	0	0	0	0	0
Israel		0	0	0	0	0	0	0	0	0	0	0	0	0	0	0	0	0	0	0	0	0	0	0	0	0	0	0	0	0	0	0
Jordan		0	0	0	0	0	0	0	0	0	0	0	0	0	0	0	0	0	0	0	0	0	0	0	0	0	0	0	0	0	0	0
Kuwait		0	0	0	0	0	0	0	0	0	0	0	0	0	0	0	0	0	0	0	0	0	0	0	0	0	0	0	0	0	0	0
Lebanon		0	0	0	0	0	0	0	0	0	0	0	0	0	0	0	0	0	0	0	0	0	0	0	0	0	0	0	0	0	0	0
Oman		0	0	0	0	0	0	0	0	0	0	0	0	0	0	0	0	0	0	0	0	0	0	0	0	0	0	0	0	0	0	0
Palestinian Territories		--	--	--	--	--	--	--	--	--	--	--	--	--	--	--	--	0	0	0	0	0	0	0	0	0	0	0	0	0	0	0
Qatar		0	0	0	0	0	0	0	0	0	0	0	0	0	0	0	0	0	0	0	0	0	0	0	0	0	0	0	0	0	0	0
Saudi Arabia		0	0	0	0	0	0	0	0	0	0	0	0	0	0	0	0	0	0	0	0	0	0	0	0	0	0	0	0	0	0	0
Syria		0	0	0	0	0	0	0	0	0	0	0	0	0	0	0	0	0	0	0	0	0	0	0	0	0	0	0	0	0	0	0
United Arab Emirates		0	0	0	0	0	0	0	0	0	0	0	0	0	0	0	0	0	0	0	0	0	0	0	0	0	0	0	0	0	0	0
Yemen		0	0	0	0	0	0	0	0	0	0	0	0	0	0	0	0	0	0	0	0	0	0	0	0	0	0	0	0	0	0	0
Algeria		0.00019	0.00019	0.00019	0.00019	0.00022	0.00024	0.00022	0.00027	0.0004	0.00027	0.0004	0.0004	0.00054	0.00054	0.00061	0.00033	0.00028	0.0002	0.00013	0	0	0	0	0	0	0	0	0	0	0	0
Angola		0	0	0	0	0	0	0	0	0	0	0	0	0	0	0	0	0	0	0	0	0	0	0	0	0	0	0	0	0	0	0
Benin		0	0	0	0	0	0	0	0	0	0	0	0	0	0	0	0	0	0	0	0	0	0	0	0	0	0	0	0	0	0	0
Botswana		0.00922	0.01004	0.00958	0.00953	0.0106	0.01211	0.01405	0.01486	0.01608	0.01926	0.01901	0.02186	0.02158	0.02183	0.02496	0.02053	0.01991	0.02378	0.02421	0.02427	0.02383	0.02442	0.02109	0.02339	0.02524	0.02465	0.02122	0.02332	0.01891	0.02532	0.01891
Burkina Faso		0	0	0	0	0	0	0	0	0	0	0	0	0	0	0	0	0	0	0	0	0	0	0	0	0	0	0	0	0	0	0
Burundi		0	0	0	0	0	0	0	0	0	0	0	0	0	0	0	0	0	0	0	0	0	0	0	0	0	0	0	0	0	0	0
Cameroon		0	0	0	0	2e-05	2e-05	2e-05	2e-05	2e-05	2e-05	2e-05	2e-05	2e-05	2e-05	2e-05	2e-05	3e-05	3e-05	3e-05	3e-05	0	0	0	0	0	0	0	0	0	0	0
Cape Verde		0	0	0	0	0	0	0	0	0	0	0	0	0	0	0	0	0	0	0	0	0	0	0	0	0	0	0	0	0	0	0
Central African Republic		0	0	0	0	0	0	0	0	0	0	0	0	0	0	0	0	0	0	0	0	0	0	0	0	0	0	0	0	0	0	0
Chad		0	0	0	0	0	0	0	0	0	0	0	0	0	0	0	0	0	0	0	0	0	0	0	0	0	0	0	0	0	0	0
Comoros		0	0	0	0	0	0	0	0	0	0	0	0	0	0	0	0	0	0	0	0	0	0	0	0	0	0	0	0	0	0	0
Congo (Brazzaville)		0	0	0	0	0	0	0	0	0	0	0	0	0	0	0	0	0	0	0	0	0	0	0	0	0	0	0	0	0	0	0
Congo (Kinshasa)		0.00369	0.00324	0.00298	0.00319	0.00319	0.00314	0.00322	0.00396	0.0029	0.00206	0.00211	0.00224	0.00243	0.00248	0.00264	0.00256	0.00233	0.00241	0.00241	0.00241	0.00249	0.00256	0.00264	0.00271	0.00301	0.00309	0.00319	0.00329	0.00339	0.00349	0.00331
Cote dIvoire (IvoryCoast)		0	0	0	0	0	0	0	0	0	0	0	0	0	0	0	0	0	0	0	0	0	0	0	0	0	0	0	0	0	0	0
Djibouti		0	0	0	0	0	0	0	0	0	0	0	0	0	0	0	0	0	0	0	0	0	0	0	0	0	0	0	0	0	0	0
Egypt		0	0	0	0	0	0	0	0	0	0	0	0	0	0	0	0	0	0	0.001	0.00149	0.00095	0.00095	0.00095	0.00085	0.00064	0	0	0	0	0	0.00061
Equatorial Guinea		0	0	0	0	0	0	0	0	0	0	0	0	0	0	0	0	0	0	0	0	0	0	0	0	0	0	0	0	0	0	0
Eritrea		--	--	--	--	--	--	--	--	--	--	--	--	--	0	0	0	0	0	0	0	0	0	0	0	0	0	0	0	0	0	0
Ethiopia		0	0	0	0	0	0	0	0	0	0	0	0	0	0	0	0	0	0	0	0	0	0	0	0	0	0	0	0	0	0	0
Gabon		0	0	0	0	0	0	0	0	0	0	0	0	0	0	0	0	0	0	0	0	0	0	0	0	0	0	0	0	0	0	0
Gambia, The		0	0	0	0	0	0	0	0	0	0	0	0	0	0	0	0	0	0	0	0	0	0	0	0	0	0	0	0	0	0	0
Ghana		0	0	0	0	0	0	0	0	0	0	0	0	0	0	0	0	0	0	0	0	0	0	0	0	0	0	0	0	0	0	0
Guinea		0	0	0	0	0	0	0	0	0	0	0	0	0	0	0	0	0	0	0	0	0	0	0	0	0	0	0	0	0	0	0
Guinea-Bissau		0	0	0	0	0	0	0	0	0	0	0	0	0	0	0	0	0	0	0	0	0	0	0	0	0	0	0	0	0	0	0
Kenya		0	0	0	0	0	0	0	0	0	0	0	0	0	0	0	0	0	0	0	0	0	0	0	0	0	0	0	0	0	0	0
Lesotho		0	0	0	0	0	0	0	0	0	0	0	0	0	0	0	0	0	0	0	0	0	0	0	0	0	0	0	0	0	0	0
Liberia		0	0	0	0	0	0	0	0	0	0	0	0	0	0	0	0	0	0	0	0	0	0	0	0	0	0	0	0	0	0	0
Libya		0	0	0	0	0	0	0	0	0	0	0	0	0	0	0	0	0	0	0	0	0	0	0	0	0	0	0	0	0	0	0
Madagascar		0	0	0	0	0	0	0	0	0	0	0	0	0	0	0	0	0	0	0	0	0	0	0	0	0	0	0	0	0	0	0
Malawi		0	0	0	0	0	0	0	0	0	0	0	0	0	0	0	0	0	0	0.00162	0.00202	0.00124	0.00153	0.00169	0.00128	0.00115	0.00141	0.00154	0.00134	0.00138	0.00128	0.00128
Mali		0	0	0	0	0	0	0	0	0	0	0	0	0	0	0	0	0	0	0	0	0	0	0	0	0	0	0	0	0	0	0
Mauritania		0	0	0	0	0	0	0	0	0	0	0	0	0	0	0	0	0	0	0	0	0	0	0	0	0	0	0	0	0	0	0
Mauritius		0	0	0	0	0	0	0	0	0	0	0	0	0	0	0	0	0	0	0	0	0	0	0	0	0	0	0	0	0	0	0
Morocco		0.02336	0.02439	0.02492	0.02781	0.02572	0.02572	0.02104	0.02114	0.01672	0.01745	0.01828	0.01911	0.02004	0.02157	0.02157	0.01679	0.01248	0.00893	0.00729	0.00175	0.00011	0	0	0.00056	0.00028	9e-05	0	0	0	0	0
Mozambique		0.00888	0.00541	0.00156	0.00108	0.00094	0.00108	0.00116	0.00121	0.00113	0.00108	0.00113	0.00108	0.00108	0.00108	0.00106	0.00054	0.00045	0.00045	0.00042	0.0004	0.0007	0.00109	0.00092	0.00042	7e-05	0.00102	0.0006	0.00095	0.00095	0.00095	0.00095
Namibia		--	--	--	--	--	--	--	--	--	0	0	0	0	0	0	0	0	0	0	0	0	0	0	0	0	0	0	0	0	0	0
Niger		0.00083	0.00125	0.00361	0.00417	0.00419	0.00344	0.00456	0.00431	0.00475	0.00478	0.00478	0.00472	0.00478	0.00478	0.00481	0.00465	0.00446	0.00446	0.00448	0.00405	0.00418	0.00469	0.00484	0.00606	0.00466	0.00452	0.00439	0.00469	0.00577	0.00577	0.00577
Nigeria		0.00312	0.00153	0.00145	0.00223	0.00374	0.00387	0.0039	0.00221	0.00218	0.00242	0.00269	0.00234	0.00075	0.00067	0.00056	0.00022	0.00026	0.00031	0.00041	8e-05	8e-05	0.0011	0.00059	8e-05	0.0002	0.0002	0.0002	0.0002	0.0002	0.0002	0.0002
Reunion		0	0	0	0	0	0	0	0	0	0	0	0	0	0	0	0	0	0	0	0	0	0	0	0	0	0	0	0	0	0	0
Rwanda		0	0	0	0	0	0	0	0	0	0	0	0	0	0	0	0	0	0	0	0	0	0	0	0	0	0	0	0	0	0	0
Saint Helena		0	0	0	0	0	0	0	0	0	0	0	0	0	0	0	0	0	0	0	0	0	0	0	0	0	0	0	0	0	0	0
Sao Tome and Principe		0	0	0	0	0	0	0	0	0	0	0	0	0	0	0	0	0	0	0	0	0	0	0	0	0	0	0	0	0	0	0
Senegal		0	0	0	0	0	0	0	0	0	0	0	0	0	0	0	0	0	0	0	0	0	0	0	0	0	0	0	0	0	0	0
Seychelles		0	0	0	0	0	0	0	0	0	0	0	0	0	0	0	0	0	0	0	0	0	0	0	0	0	0	0	0	0	0	0
Sierra Leone		0	0	0	0	0	0	0	0	0	0	0	0	0	0	0	0	0	0	0	0	0	0	0	0	0	0	0	0	0	0	0
Somalia		0	0	0	0	0	0	0	0	0	0	0	0	0	0	0	0	0	0	0	0	0	0	0	0	0	0	0	0	0	0	0
South Africa		3.0509	3.16262	3.27507	3.66932	3.91794	3.98965	3.98843	4.09393	3.97821	3.94818	4.00728	4.10877	4.14445	4.39856	4.63032	4.63614	5.20443	5.25989	5.17633	5.3029	5.34235	5.23541	5.61923	5.70191	5.75272	5.74774	5.81565	5.92242	5.85846	5.97664	5.94337
Sudan and South Sudan		0	0	0	0	0	0	0	0	0	0	0	0	0	0	0	0	0	0	0	0	0	0	0	0	0	0	0	0	0	0	0
Swaziland		0.00423	0.00423	0.00263	0.00322	0.00428	0.00444	0.00426	0.00426	0.00426	0.00412	0.00317	0.00259	0.00128	0.0047	0.00441	0.00348	0.00874	0.00874	0.01132	0.00892	0.01153	0.01306	0.01052	0.01136	0.01155	0.01136	0.01183	0.01219	0.01234	0.01234	0.01234
Tanzania		5e-05	5e-05	0.00011	8e-05	0.00011	0.00011	8e-05	8e-05	8e-05	0.00011	0.00011	0.00011	0.00118	0.00124	0.00122	0.00146	0.00072	0.00115	0.00192	0.00202	0.002	0.00202	0.00141	0.00167	0.00192	0.00205	0.0022	0.00236	0.00251	0.00269	0.00243
Togo		0	0	0	0	0	0	0	0	0	0	0	0	0	0	0	0	0	0	0	0	0	0	0	0	0	0	0	0	0	0	0
Tunisia		0	0	0	0	0	0	0	0	0	0	0	0	0	0	0	0	0	0	0	0	0	0	0	0	0	0	0	0	0	0	0
Uganda		0	0	0	0	0	0	0	0	0	0	0	0	0	0	0	0	0	0	0	0	0	0	0	0	0	0	0	0	0	0	0
Western Sahara		0	0	0	0	0	0	0	0	0	0	0	0	0	0	0	0	0	0	0	0	0	0	0	0	0	0	0	0	0	0	0
Zambia		0.01312	0.01563	0.01171	0.01327	0.01318	0.01425	0.01195	0.01351	0.01059	0.00973	0.00891	0.01128	0.00929	0.00454	0.00356	0.00436	0.00442	0.00477	0.00465	0.00477	0.00499	0.00524	0.00548	0.00293	0.00369	0.00157	0.00034	2e-05	2e-05	2e-05	2e-05
Zimbabwe		0.07712	0.07449	0.08947	0.08363	0.08377	0.10886	0.13028	0.13625	0.1235	0.13334	0.15107	0.14924	0.14216	0.13194	0.1249	0.11866	0.10759	0.11181	0.12428	0.11444	0.11136	0.10644	0.09537	0.09174	0.09728	0.0926	0.09279	0.0727	0.07662	0.08282	0.08049
Afghanistan		0.00303	0.00352	0.00352	0.00359	0.00366	0.00388	0.00405	0.00335	0.00308	0.00255	0.00228	0.00106	0.00115	0.00126	0.00138	0.0015	0.00163	0.00172	0.00194	0.00207	0.00067	0.00054	0.0009	0.00087	0.00085	0.0009	0.00623	0.00889	0.01281	0.01281	0.01281
American Samoa		0	0	0	0	0	0	0	0	0	0	0	0	0	0	0	0	0	0	0	0	0	0	0	0	0	0	0	0	0	0	0
Australia		2.27727	2.32074	2.63489	2.86031	3.08285	3.35513	3.80316	3.3472	3.71942	3.95353	4.24742	4.41381	4.43158	4.55854	4.91947	5.0017	5.683	6.09066	6.24887	6.64581	7.32971	7.54383	7.59472	7.90154	8.35133	8.67602	9.09352	9.00951	9.34884	9.66043	9.44294
Bangladesh		0	0	0	0	0	0	0	0	0	0	0	0	0	0	0	0	0	0	0	0	0	0	0	0	0.0016	0.00939	0.00752	0.01749	0.01849	0.01603	0.02082
Bhutan		0	0	0	1e-05	1e-05	2e-05	4e-05	4e-05	4e-05	4e-05	4e-05	0.00108	0.00094	0.00131	0.00189	0.00172	0.00138	0.00128	0.00128	0.00128	0.00217	0.00227	0.0017	0.00076	0.00219	0.00251	0.0027	0.00317	0.00124	0.00128	0.00128
Brunei		0	0	0	0	0	0	0	0	0	0	0	0	0	0	0	0	0	0	0	0	0	0	0	0	0	0	0	0	0	0	0
Burma (Myanmar)		0.00082	0.00111	0.00127	0.00156	0.00153	0.00178	0.00136	0.00111	0.0011	0.00117	0.00131	0.00126	0.00112	0.00104	0.00117	0.00105	0.00091	0.00097	0.00338	0.01293	0.01493	0.01184	0.021	0.0107	0.0135	0.01686	0.01832	0.01581	0.01464	0.01689	0.03128
Cambodia		0	0	0	0	0	0	0	0	0	0	0	0	0	0	0	0	0	0	0	0	0	0	0	0	0	0	0	0	0	0	0
China		12.4319	13.3243	14.291	15.7852	16.4482	16.8869	17.5664	18.5941	20.0589	20.5488	20.8424	21.4397	22.1766	23.675	24.3614	25.4719	28.5314	28.8437	27.2831	28.35	30.4343	34.5629	39.3354	42.8896	49.8822	53.2955	57.2608	60.8584	65.8986	69.9269	76.7131
Cook Islands		0	0	0	0	0	0	0	0	0	0	0	0	0	0	0	0	0	0	0	0	0	0	0	0	0	0	0	0	0	0	0
Fiji		0	0	0	0	0	0	0	0	0	0	0	0	0	0	0	0	0	0	0	0	0	0	0	0	0	0	0	0	0	0	0
French Polynesia		0	0	0	0	0	0	0	0	0	0	0	0	0	0	0	0	0	0	0	0	0	0	0	0	0	0	0	0	0	0	0
Guam		0	0	0	0	0	0	0	0	0	0	0	0	0	0	0	0	0	0	0	0	0	0	0	0	0	0	0	0	0	0	0
Hawaiian Trade Zone		0	0	0	0	0	0	--	--	--	--	--	--	--	--	--	--	--	--	--	--	--	--	--	--	--	--	--	--	--	--	--
Hong Kong		0	0	0	0	0	0	0	0	0	0	0	0	0	0	0	0	0	0	0	0	0	0	0	0	0	0	0	0	0	0	0
India		2.4232	2.53033	2.64957	3.13452	3.2323	3.53249	3.55157	3.8096	3.93836	4.16108	4.52932	4.77241	4.91513	5.10541	6.38812	5.72322	5.98118	6.07106	6.31267	6.55176	6.88545	6.50123	6.90933	7.33655	7.78031	8.22534	8.73788	9.35897	10.1024	10.0612	10.5135
Indonesia		0.01863	0.01608	0.01799	0.04116	0.05672	0.07492	0.08664	0.11331	0.23704	0.28207	0.36893	0.6014	0.78891	0.86821	1.14292	1.34922	1.40614	1.58965	1.89041	1.96285	2.39845	2.61699	3.0006	3.68244	4.36983	5.97834	6.37591	6.37422	7.46273	8.32759	9.64207
Japan		0.44693	0.42487	0.41416	0.40967	0.40166	0.32246	0.30662	0.29077	0.26444	0.2385	0.20218	0.18185	0.16748	0.1474	0.13811	0.13481	0.09114	0.08489	0.08471	0.06476	0.07009	0	0	0	0	0	0	0	0	0	0
Kiribati		0	0	0	0	0	0	0	0	0	0	0	0	0	0	0	0	0	0	0	0	0	0	0	0	0	0	0	0	0	0	0
Korea, North		1.14005	1.19965	1.20988	1.2434	1.29644	1.28222	1.25613	1.56898	1.22236	1.15487	1.11872	0.95479	0.87468	0.81995	0.76423	0.68908	0.64387	0.58136	0.65638	0.70327	0.72202	0.69495	0.71611	0.75291	0.82389	0.83498	0.72473	0.7697	0.75207	0.76472	0.75207
Korea, South		0.3548	0.35929	0.35473	0.38168	0.40263	0.43318	0.43355	0.43393	0.37124	0.30751	0.26895	0.21375	0.16863	0.13282	0.10214	0.08841	0.08459	0.08177	0.07869	0.07781	0.07157	0.06221	0.06183	0.05983	0.0531	0.05295	0.05411	0.05199	0.04723	0.03907	0.03907
Laos		0	0	1e-05	1e-05	2e-05	5e-05	2e-05	2e-05	2e-05	2e-05	2e-05	2e-05	2e-05	2e-05	0.00065	0.00136	0.00257	0.00371	0.00692	0.00676	0.00604	0.00814	0.00718	0.01016	0.0104	0.01108	0.01479	0.01321	0.01444	0.01413	0.01413
Macau		0	0	0	0	0	0	0	0	0	0	0	0	0	0	0	0	0	0	0	0	0	0	0	0	0	0	0	0	0	0	0
Malaysia		0	0	0	0	0	0.00058	0.00234	0.00239	0.00292	0.00299	0.00484	0.00473	0.00325	0.0036	0.00311	0.00671	0.00636	0.00919	0.00723	0.0112	0.01592	0.0103	0.0051	0.01135	0.01763	0.02059	0.02354	0.028	0.04775	0.05353	0.06347
Maldives		0	0	0	0	0	0	0	0	0	0	0	0	0	0	0	0	0	0	0	0	0	0	0	0	0	0	0	0	0	0	0
Mongolia		0.04801	0.06005	0.06073	0.06117	0.0727	0.07848	0.08746	0.09654	0.09077	0.08052	0.09697	0.08113	0.07063	0.06381	0.07003	0.04594	0.0421	0.04324	0.04259	0.04442	0.04408	0.04755	0.04559	0.04664	0.09944	0.10976	0.13348	0.15599	0.243	0.51407	0.6428
Nauru		0	0	0	0	0	0	0	0	0	0	0	0	0	0	0	0	0	0	0	0	0	0	0	0	0	0	0	0	0	0	0
Nepal		8e-05	8e-05	8e-05	7e-05	7e-05	4e-05	0	0	0	0	5e-05	2e-05	5e-05	0.00015	0.00015	0.0002	0.0004	0.00027	0.00045	0.00042	0.00025	0.0003	0.00027	0.00022	0.0003	0.0005	0.00035	0.00037	0.00037	0.0004	0.0004
New Caledonia		0	0	0	0	0	0	0	0	0	0	0	0	0	0	0	0	0	0	0	0	0	0	0	0	0	0	0	0	0	0	0
New Zealand		0.0628	0.06221	0.06871	0.06976	0.06745	0.06829	0.05903	0.06366	0.06998	0.06421	0.06664	0.07402	0.0767	0.07204	0.08485	0.08624	0.09067	0.08192	0.09726	0.1019	0.11056	0.12783	0.14852	0.14548	0.14861	0.16302	0.13592	0.13816	0.12805	0.14971	0.13821
Niue		0	0	0	0	0	0	0	0	0	0	0	0	0	0	0	0	0	0	0	0	0	0	0	0	0	0	0	0	0	0	0
Pakistan		0.03662	0.0417	0.03801	0.04129	0.04646	0.04532	0.04622	0.05845	0.05614	0.05897	0.06189	0.06587	0.06589	0.06889	0.06414	0.06781	0.06518	0.04516	0.04924	0.04811	0.05175	0.05095	0.05166	0.06489	0.07008	0.0576	0.06596	0.06103	0.05252	0.05298	0.05636
Papua New Guinea		0	0	0	0	0	0	0	0	0	0	0	0	0	0	0	0	0	0	0	0	0	0	0	0	0	0	0	0	0	0	0
Philippines		0.00749	0.01256	0.0228	0.02716	0.02818	0.0276	0.02665	0.02981	0.02755	0.02768	0.02817	0.03706	0.03737	0.03227	0.02418	0.02323	0.02154	0.01994	0.01998	0.02704	0.02462	0.03042	0.03998	0.04962	0.0576	0.04712	0.06788	0.07218	0.09373	0.13299	0.18869
Samoa		0	0	0	0	0	0	0	0	0	0	0	0	0	0	0	0	0	0	0	0	0	0	0	0	0	0	0	0	0	0	0
Singapore		0	0	0	0	0	0	0	0	0	0	0	0	0	0	0	0	0	0	0	0	0	0	0	0	0	0	0	0	0	0	0
Solomon Islands		0	0	0	0	0	0	0	0	0	0	0	0	0	0	0	0	0	0	0	0	0	0	0	0	0	0	0	0	0	0	0
Sri Lanka		0	0	0	0	0	0	0	0	0	0	0	0	0	0	0	0	0	0	0	0	0	0	0	0	0	0	0	0	0	0	0
Taiwan		0.06633	0.06464	0.06064	0.05453	0.05038	0.04678	0.04066	0.03323	0.02127	0.0128	0.01092	0.00867	0.00807	0.00702	0.00653	0.00397	0.00256	0.00204	0.00237	0.00215	0	0	0	0	0	0	0	0	0	0	0
Thailand		0.01826	0.02314	0.02182	0.02723	0.0566	0.06043	0.07575	0.0799	0.09843	0.13611	0.16025	0.15994	0.16148	0.17748	0.19096	0.27528	0.28322	0.24363	0.22064	0.2149	0.2369	0.23684	0.22768	0.24237	0.25226	0.23042	0.22038	0.22095	0.2149	0.22164	0.25539
Timor-Leste (East Timor)		--	--	--	--	--	--	--	--	--	--	--	--	--	--	--	--	--	--	--	--	--	--	0	0	0	0	0	0	0	0	0
Tonga		0	0	0	0	0	0	0	0	0	0	0	0	0	0	0	0	0	0	0	0	0	0	0	0	0	0	0	0	0	0	0
U.S. Pacific Islands		0	0	0	0	0	0	0	0	0	0	0	0	0	0	0	0	0	0	0	0	0	0	0	0	0	0	0	0	0	0	0
Vanuatu		0	0	0	0	0	0	0	0	0	0	0	0	0	0	0	0	0	0	0	0	0	0	0	0	0	0	0	0	0	0	0
Vietnam		0.13999	0.14652	0.14699	0.11666	0.13052	0.14284	0.14774	0.14137	0.11983	0.10875	0.11982	0.11824	0.14539	0.14132	0.20156	0.236	0.2657	0.27233	0.22466	0.27086	0.30243	0.37098	0.38964	0.59496	0.75854	0.91266	0.99795	0.95287	1.02536	1.04207	1.03883
Wake Island		0	0	0	0	0	0	0	0	0	0	0	0	0	0	0	0	0	0	0	0	0	0	0	0	0	0	0	0	0	0	0
