# Supplementary material
Source: MDPI journal article supplement (https://www.mdpi.com/1099-4300/15/12/5565)
Supplement: s2 [file s2 › Sources/Raw Data/Total_Primary_Energy_Consumption_(Quadrillion_Btu).xls]

## Sheet: Data3
Table: Total Primary Energy Consumption (Quadrillion Btu)
		1980	1981	1982	1983	1984	1985	1986	1987	1988	1989	1990	1991	1992	1993	1994	1995	1996	1997	1998	1999	2000	2001	2002	2003	2004	2005	2006	2007	2008	2009	2010	2011
North America		91.6	89.8213	86.6426	86.225	90.6032	90.9635	91.2418	94.121	98.323	100.797	100.143	100.544	102.334	104.288	106.481	108.522	112.072	112.913	113.325	115.694	118.468	115.348	117.045	117.932	120.72	121.203	120.762	122.868	120.104	114.624	118.345	NA
Bermuda		0.00793	0.00686	0.00727	0.00771	0.00752	0.00741	0.007	0.00988	0.0108	0.01315	0.00928	0.00805	0.00647	0.00695	0.00743	0.00739	0.0075	0.00752	0.00752	0.00752	0.0075	0.00744	0.00752	0.00814	0.00869	0.00927	0.00922	0.01018	0.00981	0.00971	0.00955	NA
Canada		9.79686	9.58952	9.20637	9.18989	9.78461	10.1523	10.2542	10.5858	11.054	11.2011	10.9809	11.1181	11.4611	11.7044	12.0236	12.2144	12.5531	12.6488	12.3453	12.9683	13.3048	12.8724	13.0965	13.5257	14.1142	14.1724	13.8183	14.0259	13.5463	13.0971	13.0007	13.4948
Greenland		0.00791	0.00746	0.00722	0.00505	0.00799	0.00714	0.00462	0.00335	0.00777	0.00671	0.00787	0.00779	0.00687	0.00708	0.00719	0.00719	0.00728	0.00746	0.00756	0.00756	0.00772	0.00796	0.00805	0.00809	0.00813	0.00829	0.00846	0.00826	0.00917	0.00893	0.00893	NA
Mexico		3.71845	4.10949	4.32049	4.04957	4.16918	4.40226	4.32653	4.46445	4.53802	4.78677	4.65663	4.96898	5.07372	5.14468	5.34952	5.26286	5.48104	5.64601	5.94557	6.05728	6.33194	6.29111	6.28657	6.41137	6.42585	6.73068	7.29561	7.5267	7.26255	6.94764	7.28397	7.8079
Saint Pierre and Miquelon		0.0022	0.00221	0.00203	0.00221	0.00216	0.00191	0.0024	0.00306	0.00319	0.00365	0.00359	0.00341	0.00318	0.00174	0.00183	0.00122	0.00121	0.00083	0.00096	0.00096	0.00105	0.00096	0.00096	0.00105	0.00113	0.00117	0.00118	0.00122	0.00123	0.00122	0.00122	NA
United States		78.0667	76.1058	73.0992	72.9706	76.6317	76.3924	76.647	79.0545	82.7092	84.7859	84.4852	84.438	85.783	87.4236	89.0914	91.0291	94.0222	94.6022	95.0179	96.652	98.8145	96.1681	97.6451	97.9776	100.162	100.282	99.6294	101.296	99.2745	94.5591	98.041	97.2625
Central & South America		11.5354	11.4871	11.4788	11.3436	12.0815	12.3164	13.0732	13.3634	13.7019	14.1615	14.4967	15.1021	15.3033	13.8897	16.8368	17.59	18.5059	19.433	20.1041	20.2686	20.798	21.1057	21.095	21.542	22.4828	23.2291	24.3409	24.6604	25.7009	25.2835	26.8687	NA
Antarctica		0.00213	0.00213	0.00212	0.00213	0.0027	0.00304	0.00275	0.00283	0.00291	0.00288	0.00292	0.00305	0.00304	0.00304	0.00305	0.00314	0.00313	0.00314	0.00314	0.00314	0.00313	0.00318	0.00318	0.00327	0.00325	0.0035	0.0035	0.00337	0.00376	0.00339	0.00105	NA
Antigua and Barbuda		0.00598	0.00531	0.00711	0.00415	0.0047	0.00461	0.00462	0.00564	0.0058	0.00582	0.00608	0.006	0.00598	0.00588	0.00661	0.00679	0.00677	0.00705	0.00705	0.00705	0.00725	0.00727	0.00732	0.00776	0.00836	0.00909	0.00927	0.00891	0.00973	0.00943	0.00941	NA
Argentina		1.64051	1.59727	1.67291	1.69301	1.83715	1.74184	1.89741	1.95164	1.95674	1.93995	1.87408	1.97165	2.04721	1.97028	2.243	2.31176	2.39434	2.46399	2.5753	2.60422	2.66876	2.61239	2.48186	2.66675	2.7809	2.95491	3.13524	3.27338	3.35163	3.30164	3.34874	NA
Aruba		--	--	--	--	--	--	0.00146	0.00146	0.00556	0.00747	0.00787	0.00858	0.00921	0.0089	0.0104	0.01201	0.0079	0.01264	0.01277	0.01277	0.01349	0.01353	0.01353	0.01442	0.01452	0.01487	0.01597	0.01461	0.01407	0.01449	0.01517	NA
Bahamas, The		0.0599	0.06326	0.0541	0.04065	0.03669	0.03321	0.03275	0.03622	0.0338	0.03847	0.04116	0.0365	0.03061	0.02965	0.03625	0.04254	0.04778	0.04751	0.0536	0.04834	0.04749	0.0466	0.0469	0.0566	0.0572	0.0658	0.06591	0.06274	0.07109	0.04867	0.04867	NA
Barbados		0.01446	0.0153	0.01527	0.01613	0.01555	0.01715	0.01826	0.01731	0.01645	0.01773	0.0184	0.01857	0.01877	0.01777	0.018	0.01844	0.0164	0.02033	0.02098	0.0215	0.02378	0.02293	0.02293	0.02335	0.01599	0.0216	0.0206	0.01865	0.01746	0.02054	0.0193	NA
Belize		0.00371	0.00344	0.00325	0.00325	0.00351	0.00352	0.00421	0.00348	0.00262	0.00362	0.00495	0.00548	0.00474	0.00442	0.00449	0.00552	0.00495	0.0075	0.00747	0.00767	0.01074	0.01431	0.01376	0.01409	0.01513	0.01598	0.01709	0.01752	0.01782	0.01193	0.0125	NA
Bolivia		0.07454	0.0834	0.07371	0.07562	0.07319	0.06694	0.06835	0.06706	0.07765	0.08738	0.09259	0.09112	0.09799	0.08437	0.10828	0.12332	0.12122	0.13546	0.12563	0.14117	0.16192	0.14481	0.157	0.19835	0.20213	0.20023	0.22594	0.23317	0.24958	0.22976	0.23258	NA
Brazil		4.02179	3.88321	3.94323	3.94192	4.30882	4.59267	4.9686	5.11182	5.28481	5.44799	5.75431	5.99591	6.07731	5.0104	6.62072	7.02034	7.45336	7.85629	8.11133	8.25842	8.53326	8.44866	8.55386	8.66412	8.99638	9.35596	9.69969	10.1288	10.3383	10.4265	11.2991	11.6573
Cayman Islands		0.00144	0.00155	0.00155	0.00151	0.00155	0.00159	0.0016	0.00163	0.00382	0.00388	0.00396	0.00422	0.0043	0.00386	0.00445	0.00483	0.00486	0.00487	0.00496	0.00496	0.0049	0.00496	0.00496	0.00514	0.00551	0.00578	0.00657	0.00757	0.00925	0.00774	0.00778	NA
Chile		0.42668	0.41949	0.37365	0.37945	0.39224	0.39888	0.38895	0.41039	0.44866	0.50603	0.57143	0.5706	0.61665	0.62062	0.70588	0.78044	0.84226	0.95505	0.93508	0.98803	1.01272	1.04667	1.0647	1.11922	1.19658	1.27932	1.31642	1.0911	1.34684	1.29926	1.33341	1.35782
Colombia		0.69636	0.71547	0.76684	0.77864	0.85268	0.86345	0.90079	0.82399	0.91932	0.95303	0.88984	0.96652	0.97614	1.00023	1.09987	1.09449	1.18949	1.22756	1.23964	1.17921	1.17201	1.16349	1.16015	1.20249	1.21593	1.26835	1.31278	1.33293	1.34274	1.33538	1.36665	NA
Costa Rica		0.05545	0.0572	0.0558	0.06133	0.05911	0.05935	0.05825	0.06449	0.06984	0.07579	0.0744	0.07934	0.093	0.0976	0.10293	0.1059	0.10708	0.11854	0.12158	0.13348	0.14104	0.14556	0.15333	0.15957	0.16397	0.16188	0.17481	0.18426	0.19038	0.18469	0.18718	NA
Cuba		0.45633	0.46398	0.50137	0.45973	0.47576	0.48409	0.50085	0.49279	0.50004	0.51029	0.50176	0.46286	0.40903	0.37085	0.41167	0.41897	0.42871	0.47225	0.44953	0.4568	0.45968	0.46595	0.46699	0.46354	0.51958	0.45093	0.35559	0.37219	0.35797	0.41463	0.39997	NA
Dominica		0.00048	0.00061	0.0006	0.00067	0.00068	0.00073	0.00072	0.00077	0.00096	0.00101	0.00101	0.00101	0.00101	0.001	0.0012	0.00135	0.00135	0.00136	0.00147	0.00153	0.00148	0.00175	0.00191	0.00203	0.00188	0.0016	0.00195	0.00193	0.00204	0.00204	0.00214	NA
Dominican Republic		0.08726	0.08641	0.09122	0.10872	0.09397	0.10676	0.10905	0.12611	0.13375	0.12745	0.13872	0.14124	0.14654	0.12852	0.14665	0.15912	0.1726	0.18204	0.18805	0.21787	0.23415	0.24458	0.25249	0.28608	0.27171	0.27188	0.28134	0.29372	0.29398	0.28108	0.28926	NA
Ecuador		0.18651	0.19313	0.21098	0.19725	0.2079	0.2206	0.23703	0.2338	0.2423	0.2372	0.25381	0.26809	0.29819	0.25434	0.31462	0.30813	0.3324	0.34286	0.35013	0.33588	0.34462	0.3609	0.36515	0.37612	0.3921	0.40707	0.44521	0.47334	0.57449	0.53288	0.56297	NA
El Salvador		0.04527	0.04153	0.04156	0.0424	0.04507	0.04512	0.04824	0.04681	0.05113	0.05198	0.05371	0.05309	0.06031	0.05704	0.06857	0.08432	0.08619	0.08659	0.09891	0.10382	0.10082	0.10523	0.10397	0.1135	0.11117	0.11716	0.12156	0.12288	0.12097	0.11837	0.12442	NA
Falkland Islands (Islas Malvinas)		0.00017	0.00017	0.00017	0.00017	0.00017	0.00022	0.00022	0.00022	0.00043	0.00039	0.00035	0.00035	0.00035	0.00035	0.00035	0.00039	0.00044	0.00048	0.00039	0.00039	0.00039	0.0004	0.00044	0.00044	0.00048	0.00053	0.00057	0.00065	0.00068	0.00067	0.00067	NA
French Guiana		0.00515	0.00443	0.00565	0.00581	0.00463	0.00465	0.00542	0.00598	0.00706	0.00796	0.00951	0.01075	0.00861	0.01128	0.01169	0.01332	0.01329	0.01332	0.01355	0.01355	0.01369	0.01921	0.01969	0.02057	0.02019	0.021	0.02132	0.02097	0.0203	0.01847	0.02087	NA
Grenada		0.00067	0.00077	0.00085	0.00083	0.00085	0.00088	0.00098	0.00102	0.00111	0.00115	0.00178	0.00178	0.00183	0.00181	0.00237	0.00221	0.00244	0.00308	0.00278	0.00278	0.00181	0.00318	0.00345	0.00349	0.00352	0.00361	0.00381	0.00377	0.0039	0.00398	0.00397	NA
Guadeloupe		0.00707	0.0101	0.01275	0.01339	0.01483	0.01341	0.01378	0.01567	0.01712	0.01916	0.02063	0.0216	0.02005	0.02142	0.02398	0.0246	0.02436	0.02481	0.02486	0.02486	0.02632	0.02679	0.02733	0.02931	0.02985	0.03126	0.03275	0.03631	0.03707	0.03188	0.03188	NA
Guatemala		0.06717	0.05719	0.05804	0.063	0.05405	0.06058	0.06525	0.06536	0.07126	0.07487	0.08019	0.07816	0.08511	0.08435	0.10313	0.10917	0.11322	0.12286	0.14229	0.15264	0.15753	0.16974	0.1687	0.17628	0.19425	0.20438	0.20222	0.20965	0.19736	0.21336	0.21337	NA
Guyana		0.02142	0.02434	0.01956	0.01726	0.01973	0.02005	0.01933	0.0147	0.01461	0.00977	0.00942	0.01085	0.01239	0.01523	0.01556	0.0133	0.01421	0.01557	0.0197	0.02096	0.0229	0.02354	0.02393	0.02341	0.02101	0.02313	0.022	0.02186	0.02235	0.02256	0.02244	NA
Haiti		0.015	0.01088	0.0143	0.01285	0.01307	0.01495	0.01467	0.0213	0.02316	0.02134	0.01413	0.01418	0.01531	0.01099	0.01	0.01564	0.01822	0.02185	0.02161	0.02341	0.02408	0.02601	0.02652	0.02639	0.02686	0.02719	0.02785	0.02907	0.03579	0.03339	0.03097	NA
Honduras		0.03317	0.03085	0.0315	0.0329	0.03382	0.03222	0.03763	0.03635	0.04547	0.05259	0.0593	0.05895	0.06051	0.05982	0.0609	0.06496	0.07339	0.07457	0.08028	0.08749	0.08601	0.09293	0.09775	0.10039	0.10937	0.11675	0.12283	0.13443	0.13243	0.12509	0.13198	NA
Jamaica		0.11805	0.09955	0.08658	0.09239	0.07545	0.06769	0.06822	0.07341	0.08471	0.09729	0.10347	0.10548	0.11568	0.1129	0.12196	0.13443	0.1378	0.14507	0.14803	0.15221	0.14637	0.14699	0.15054	0.15637	0.15835	0.15258	0.17143	0.18033	0.17854	0.12778	0.12696	NA
Martinique		0.00934	0.00919	0.00917	0.00906	0.00813	0.00979	0.01053	0.01194	0.01429	0.02028	0.02189	0.01806	0.02012	0.02504	0.02706	0.02766	0.02769	0.02772	0.02777	0.02777	0.02815	0.02841	0.02879	0.03002	0.03085	0.03266	0.03259	0.03382	0.03016	0.03605	0.0361	NA
Montserrat		0.00026	0.00028	0.00028	0.00028	0.00028	0.00031	0.00031	0.00035	0.0004	0.0004	0.00053	0.00049	0.00057	0.00057	0.00057	0.00066	0.00062	0.00066	0.00071	0.00071	0.00075	0.00075	0.00075	0.00084	0.00092	0.00097	0.00106	0.00115	0.00117	0.00115	0.00115	NA
Netherlands Antilles		0.23781	0.22241	0.21486	0.19761	0.18614	0.15532	0.1517	0.15405	0.14343	0.15139	0.14774	0.14015	0.13817	0.11235	0.14504	0.15289	0.1525	0.16189	0.16162	0.15601	0.15593	0.15784	0.15109	0.14478	0.14548	0.15318	0.16036	0.16864	0.19364	0.17341	0.16436	NA
Nicaragua		0.03277	0.03356	0.03337	0.03173	0.03214	0.03573	0.03478	0.03609	0.03669	0.03994	0.03701	0.03531	0.03978	0.03772	0.04204	0.04486	0.04705	0.04856	0.05237	0.05658	0.05537	0.0591	0.06114	0.06242	0.06628	0.07106	0.07053	0.07157	0.07145	0.07015	0.07232	NA
Panama		0.18343	0.18621	0.17593	0.17807	0.18243	0.16576	0.17099	0.17813	0.1752	0.17082	0.18065	0.17912	0.18153	0.17581	0.20398	0.21583	0.19331	0.19884	0.20818	0.2049	0.20637	0.20344	0.20284	0.19682	0.2272	0.22021	0.2299	0.23553	0.23881	0.25028	0.27683	NA
Paraguay		0.0279	0.02715	0.02639	0.02846	0.03129	0.05515	0.11264	0.1677	0.17444	0.21662	0.23076	0.2449	0.23047	0.25682	0.30165	0.34792	0.36317	0.40086	0.40787	0.42376	0.42971	0.37938	0.39444	0.4241	0.41508	0.40976	0.42508	0.4253	0.4405	0.43597	0.43752	NA
Peru		0.40399	0.43033	0.42903	0.40122	0.41196	0.41853	0.4496	0.45514	0.45353	0.40696	0.38495	0.38181	0.37605	0.39742	0.45232	0.47403	0.50359	0.48611	0.50307	0.51302	0.52873	0.53776	0.54613	0.55734	0.58274	0.61903	0.67681	0.68496	0.76281	0.74815	0.84796	NA
Puerto Rico		0.42761	0.45014	0.33107	0.3207	0.35934	0.31086	0.33724	0.35071	0.3202	0.3123	0.30014	0.37303	0.33257	0.30891	0.35589	0.36377	0.37427	0.38432	0.39356	0.32745	0.44069	0.47836	0.48162	0.51986	0.53042	0.51355	0.51434	0.42645	0.44085	0.39426	0.43966	NA
Saint Kitts and Nevis		0.00075	0.00079	0.00091	0.00074	0.00075	0.00075	0.00075	0.00079	0.00092	0.00092	0.00092	0.00106	0.00105	0.00118	0.00141	0.00128	0.00145	0.00145	0.00145	0.00145	0.00145	0.00145	0.00145	0.00163	0.00179	0.00189	0.00249	0.00354	0.00355	0.00372	0.00372	NA
Saint Lucia		0.00164	0.0013	0.00155	0.00143	0.00143	0.00176	0.00177	0.00198	0.00242	0.00243	0.00243	0.00243	0.00251	0.00229	0.00278	0.00283	0.00282	0.00296	0.00296	0.00296	0.00471	0.00494	0.00504	0.00552	0.00533	0.00532	0.00548	0.00577	0.00603	0.00587	0.00587	NA
Saint Vincent/Grenadines		0.00073	0.00069	0.00074	0.00074	0.00074	0.00085	0.00087	0.00095	0.00112	0.00149	0.00141	0.00125	0.0014	0.00125	0.002	0.00209	0.00208	0.00221	0.00261	0.00261	0.00269	0.00268	0.00284	0.00296	0.00318	0.00317	0.0031	0.00314	0.00316	0.00314	0.00317	NA
Suriname		0.04058	0.03563	0.03487	0.0247	0.02339	0.02843	0.02605	0.01907	0.02224	0.03013	0.03454	0.03523	0.03449	0.03413	0.03533	0.03394	0.03357	0.03409	0.03431	0.03452	0.02927	0.03074	0.032	0.03275	0.03364	0.03496	0.03608	0.03571	0.03577	0.03637	0.03585	NA
Trinidad and Tobago		0.17413	0.16712	0.16779	0.18491	0.25078	0.27406	0.20582	0.19155	0.19772	0.21256	0.22627	0.25308	0.24797	0.26419	0.31133	0.32539	0.35887	0.3891	0.3875	0.3986	0.42055	0.47354	0.49998	0.53889	0.59	0.67327	0.82112	0.82411	0.89599	0.85012	0.93624	NA
Turks and Caicos Islands		0	0	0	0	0	0	0	0	0	0	0	0	0	0	0	0.00019	0.00019	0.00019	0.00021	0.00021	0.00039	0.00023	0.00018	0.00018	0.00017	0.00018	0.00017	0.001	0.00222	0.00226	0.00226	NA
Uruguay		0.10936	0.10367	0.0985	0.12028	0.11708	0.10847	0.11381	0.12167	0.11877	0.10472	0.13414	0.11965	0.13687	0.13013	0.13842	0.12476	0.12886	0.14186	0.17754	0.15973	0.16448	0.16221	0.16845	0.16337	0.14096	0.15679	0.14879	0.1778	0.18452	0.18958	0.21154	NA
Venezuela		1.5883	1.72323	1.7466	1.6837	1.71362	1.74239	1.88679	1.92305	1.93668	2.06224	2.08687	2.21113	2.2178	2.06923	2.43677	2.46985	2.57638	2.66169	2.85389	2.647	2.76891	3.03054	2.93435	2.72196	2.93675	2.91656	3.15857	3.06615	3.22512	3.03864	3.32096	NA
Virgin Islands, U.S.		0.24982	0.22395	0.16259	0.1143	0.13365	0.1496	0.09966	0.11733	0.08209	0.12507	0.11595	0.11875	0.12131	0.08506	0.12289	0.12184	0.12054	0.12303	0.12754	0.30632	0.13864	0.19195	0.19075	0.22458	0.23458	0.22889	0.23891	0.21603	0.22305	0.2232	0.22814	NA
Virgin Islands, British		0.00032	0.00051	0.00051	0.00051	0.00047	0.00048	0.00053	0.00062	0.00066	0.0007	0.0007	0.0007	0.00075	0.00075	0.00075	0.00075	0.00084	0.00084	0.00084	0.00084	0.00084	0.00084	0.00084	0.00097	0.00123	0.00132	0.00141	0.00153	0.0016	0.00157	0.00157	NA
Europe		71.7465	69.5103	68.7749	69.1239	70.8161	72.9414	74.5478	76.0182	76.4533	77.0152	76.3181	75.9158	74.8043	74.951	74.8489	76.7003	79.4248	79.4757	80.1075	80.1344	81.5278	82.6557	82.5175	84.0854	85.9454	85.7625	86.3117	86.6985	85.6462	81.2192	83.8245	NA
Albania		0.15475	0.15461	0.15416	0.15878	0.16072	0.16086	0.15769	0.1573	0.16167	0.1503	0.10797	0.09283	0.08337	0.05894	0.0692	0.07627	0.08487	0.07729	0.08352	0.09466	0.09619	0.0916	0.09516	0.11449	0.11651	0.12092	0.11852	0.10319	0.10963	0.11511	0.12509	NA
Austria		1.09577	1.08623	1.03457	1.04021	1.06518	1.08788	1.08336	1.03252	1.11489	1.13012	1.16472	1.22261	1.2003	1.24066	1.23269	1.28864	1.33825	1.35389	1.37968	1.38403	1.38594	1.43983	1.45087	1.4705	1.50963	1.55066	1.53621	1.5442	1.53367	1.47479	1.52707	1.46997
Belgium		2.06423	2.05095	1.93514	1.84186	1.90722	2.00146	2.0658	2.10008	2.09054	2.15121	2.18895	2.27438	2.23941	2.24185	2.37609	2.43884	2.58689	2.64582	2.69823	2.65509	2.7338	2.70258	2.6794	2.78228	2.80785	2.77869	2.7376	2.73626	2.91486	2.65429	2.74807	2.69109
Bosnia and Herzegovina		--	--	--	--	--	--	--	--	--	--	--	--	0.2585	0.19454	0.10419	0.17611	0.11437	0.15959	0.18607	0.19127	0.22358	0.22112	0.2316	0.22736	0.25338	0.27251	0.27846	0.25997	0.29093	0.30239	0.32508	NA
Bulgaria		1.32139	1.31357	1.35888	1.37968	1.39121	1.42884	1.41493	1.40928	1.40933	1.31732	1.18045	0.91293	0.90167	0.80713	0.84447	0.92138	0.94847	0.91626	0.84782	0.77174	0.86773	0.90406	0.8746	0.88654	0.87492	0.91869	0.94058	0.84127	0.81712	0.72108	0.76948	NA
Croatia		--	--	--	--	--	--	--	--	--	--	--	--	0.31231	0.30039	0.33778	0.34423	0.34821	0.35472	0.37228	0.37461	0.3756	0.38411	0.37378	0.39311	0.40806	0.404	0.41504	0.3948	0.40653	0.38864	0.39557	NA
Cyprus		0.04202	0.03622	0.03868	0.04296	0.04405	0.04677	0.04851	0.05427	0.05423	0.06548	0.06967	0.07014	0.08134	0.07297	0.09299	0.09256	0.09056	0.09221	0.09985	0.10526	0.10312	0.1125	0.11064	0.11157	0.11762	0.11984	0.12625	0.12657	0.13154	0.12457	0.12146	NA
Czech Republic		--	--	--	--	--	--	--	--	--	--	--	--	--	1.60239	1.5408	1.565	1.65351	1.4628	1.42265	1.33374	1.40621	1.45203	1.45139	1.51756	1.51531	1.55617	1.58825	1.64613	1.61534	1.53063	1.59118	1.57418
Denmark		0.86306	0.74856	0.73866	0.69914	0.71871	0.814	0.81503	0.83236	0.80544	0.75262	0.76934	0.84526	0.79464	0.84161	0.8776	0.88374	0.97945	0.94273	0.9219	0.89472	0.87642	0.88917	0.8576	0.89932	0.86591	0.84618	0.90184	0.88542	0.84197	0.79435	0.83053	0.78282
Faroe Islands		0.00663	0.00051	0.00051	0.00052	0.00051	0.00051	0.00764	0.00801	0.00848	0.0093	0.00995	0.0092	0.00927	0.00892	0.00933	0.00977	0.00994	0.01003	0.01009	0.01002	0.01022	0.01022	0.01049	0.0105	0.01068	0.01086	0.01172	0.0113	0.01139	0.01133	0.0109	NA
Finland		0.97218	0.98988	0.90641	0.90382	0.94532	0.95667	0.98873	1.06452	1.06046	1.0708	1.11584	1.13321	1.13548	1.14658	1.1855	1.13069	1.1434	1.1787	1.22525	1.21317	1.21661	1.22831	1.24334	1.31717	1.3526	1.26539	1.32564	1.35083	1.29482	1.20685	1.30311	1.22339
Former Czechoslovakia		2.74465	2.72524	2.71119	2.73763	2.78659	2.84158	2.92215	2.98367	2.89939	2.92971	2.90599	2.56488	2.38451	--	--	--	--	--	--	--	--	--	--	--	--	--	--	--	--	--	--	--
Former Serbia and Montenegro		--	--	--	--	--	--	--	--	--	--	--	--	0.6656	0.52887	0.55562	0.47592	0.74418	0.75552	0.78056	0.62643	0.6587	0.70203	0.77788	0.78073	0.79528	0.76979	--	--	--	--	--	--
Former Yugoslavia		1.66547	1.74257	1.78375	1.82429	2.12645	2.19666	2.20724	2.22166	2.22773	2.23046	2.13426	1.90296	--	--	--	--	--	--	--	--	--	--	--	--	--	--	--	--	--	--	--	--
France		8.38888	8.06714	7.7905	7.91184	8.17075	8.34985	8.48675	8.61137	8.59016	8.87517	9.12628	9.739	9.91544	9.80301	9.78224	10.0532	10.5303	10.3636	10.5916	10.7169	10.9578	11.0922	11.0007	11.1208	11.4025	11.3558	11.3806	11.2953	11.2937	10.7337	11.0255	10.7807
Germany		--	--	--	--	--	--	--	--	--	--	--	14.3027	14.0417	14.0759	14.0169	14.3883	14.4	14.346	14.3343	14.1161	14.4101	14.7601	14.4491	14.7025	14.8192	14.4221	14.6817	14.2264	14.3958	13.5242	13.9367	13.0819
Germany, East		3.59379	3.56468	3.60263	3.5452	3.60512	3.80455	3.8116	3.82739	3.81678	3.71624	3.39701	--	--	--	--	--	--	--	--	--	--	--	--	--	--	--	--	--	--	--	--	--
Germany, West		11.2703	10.7692	10.4956	10.4946	10.8088	11.0244	11.4074	11.4061	11.4733	11.1784	11.4596	--	--	--	--	--	--	--	--	--	--	--	--	--	--	--	--	--	--	--	--	--
Gibraltar		0.00738	0.00827	0.00736	0.00581	0.0054	0.01246	0.01868	0.01898	0.02451	0.02104	0.02185	0.02252	0.03988	0.04068	0.04172	0.04181	0.04186	0.04181	0.04825	0.04203	0.09355	0.05126	0.05216	0.0535	0.05489	0.05644	0.05775	0.05952	0.06104	0.06265	0.06368	NA
Greece		0.75171	0.74718	0.72815	0.74775	0.76766	0.80896	0.83651	0.89817	0.9576	1.00161	1.03846	1.05581	1.02027	1.07296	1.08683	1.12394	1.14511	1.19909	1.27422	1.26643	1.338	1.35539	1.35968	1.43748	1.42721	1.44302	1.4855	1.50936	1.47097	1.40269	1.3418	1.29289
Hungary		1.20988	1.20101	1.19572	1.20769	1.18705	1.23217	1.24261	1.27868	1.24846	1.24638	1.18139	1.13205	1.05496	1.02682	1.02824	1.03449	1.06992	1.0458	1.05257	1.05058	1.02243	1.05724	1.06097	1.08511	1.08542	1.15794	1.14796	1.12415	1.10717	1.03658	1.05124	NA
Iceland		0.05649	0.05619	0.05982	0.06287	0.06693	0.06615	0.06864	0.07091	0.07335	0.07658	0.07833	0.07622	0.07781	0.08151	0.08296	0.08444	0.09067	0.09451	0.10388	0.11282	0.1199	0.12267	0.12659	0.12829	0.12972	0.1306	0.14327	0.16695	0.20929	0.2039	0.20542	NA
Ireland		0.32304	0.31186	0.30854	0.29988	0.30755	0.31388	0.3391	0.33993	0.334	0.34706	0.36766	0.38463	0.39173	0.40324	0.42272	0.43221	0.4589	0.48859	0.53077	0.56486	0.60027	0.62845	0.62447	0.61908	0.64429	0.66413	0.70269	0.70299	0.69324	0.62099	0.62811	0.59332
Italy		6.11717	6.00108	5.85958	5.75121	6.01082	6.02781	6.1078	6.331	6.48621	6.67551	6.72365	6.87508	6.83769	6.82577	6.73242	7.04419	7.0722	7.17685	7.38134	7.50781	7.58182	7.62301	7.65325	7.90469	8.16668	8.07918	8.00936	8.03926	7.83857	7.35131	7.62586	7.40538
Luxembourg		0.14196	0.12669	0.12047	0.11458	0.1236	0.12541	0.125	0.12441	0.12894	0.13885	0.14474	0.15658	0.15566	0.16262	0.1567	0.13923	0.14186	0.14123	0.13841	0.14602	0.15384	0.16143	0.16988	0.17893	0.19745	0.20597	0.20346	0.1993	0.19594	0.18552	0.19874	0.19426
Macedonia		--	--	--	--	--	--	--	--	--	--	--	--	0.11972	0.12041	0.11189	0.11526	0.12501	0.12249	0.13989	0.12905	0.11505	0.10637	0.1066	0.1156	0.11805	0.11917	0.11709	0.11407	0.11367	0.1128	0.12055	NA
Malta		0.01888	0.02056	0.02211	0.01587	0.02247	0.01833	0.021	0.02361	0.02654	0.02898	0.03049	0.03103	0.03098	0.03471	0.03589	0.03366	0.03497	0.03735	0.03905	0.04454	0.03919	0.0329	0.03939	0.03925	0.03973	0.04122	0.03904	0.04138	0.04255	0.08783	0.10438	NA
Montenegro		--	--	--	--	--	--	--	--	--	--	--	--	--	--	--	--	--	--	--	--	--	--	--	--	--	--	0.04016	0.03602	0.04311	0.03953	0.04752	NA
Netherlands		3.20502	3.00721	2.87289	2.81453	2.88156	3.00962	3.14291	3.23155	3.24036	3.25926	3.31155	3.49597	3.46819	3.53956	3.50861	3.57411	3.73196	3.69864	3.69078	3.68216	3.79343	3.92944	3.93986	4.02199	4.13271	4.23416	4.14183	4.35459	4.14045	4.07681	4.2662	4.07899
Norway		1.34103	1.38834	1.34656	1.47001	1.53129	1.54751	1.54194	1.57291	1.60034	1.67164	1.71032	1.61945	1.71221	1.71023	1.68012	1.78719	1.68984	1.74909	1.80677	1.88487	1.98845	1.89297	1.94002	1.82	1.92523	2.0028	1.84424	1.97706	1.94232	1.89931	1.86836	1.86774
Poland		5.06796	4.57704	4.58383	4.59384	4.75503	4.91312	5.00005	5.16208	5.0579	4.86104	3.95022	3.87079	3.83475	3.96796	3.81655	3.70105	4.14003	4.08498	3.8487	3.97659	3.62445	3.45492	3.45339	3.57188	3.74765	3.67445	3.85182	3.91829	3.89067	3.78329	4.05529	4.09296
Portugal		0.43149	0.36906	0.48664	0.50029	0.52866	0.53583	0.56926	0.5882	0.65129	0.70028	0.74771	0.74822	0.75685	0.76917	0.80845	0.84072	0.87647	0.91333	0.97411	1.02381	1.07048	1.08598	1.08306	1.11732	1.11244	1.12608	1.1019	1.12765	1.06227	1.0649	1.12574	1.074
Romania		2.75196	2.7643	2.88751	2.94744	2.87816	2.88837	2.96275	3.03482	2.99265	3.10534	2.81496	2.20882	2.05098	1.86929	1.86797	2.01514	2.05075	2.02501	1.73668	1.59261	1.58611	1.71549	1.68366	1.63078	1.68956	1.6655	1.67453	1.66212	1.64164	1.41096	1.42516	NA
Serbia		--	--	--	--	--	--	--	--	--	--	--	--	--	--	--	--	--	--	--	--	--	--	--	--	--	--	0.77822	0.76824	0.74762	0.74543	0.77456	NA
Slovakia		--	--	--	--	--	--	--	--	--	--	--	--	--	0.77884	0.7458	0.80378	0.78591	0.77533	0.77298	0.76946	0.78498	0.82957	0.84408	0.82019	0.80533	0.83036	0.81948	0.79151	0.80208	0.72467	0.77205	0.73283
Slovenia		--	--	--	--	--	--	--	--	--	--	--	--	0.22947	0.23469	0.24616	0.27732	0.30619	0.29136	0.29111	0.29421	0.29282	0.29895	0.30204	0.30098	0.31417	0.3193	0.31761	0.31862	0.33989	0.30802	0.30953	0.30403
Spain		3.04408	3.09005	3.33173	3.41925	3.25094	3.33717	3.39223	3.49437	3.74424	3.85778	3.92295	4.14693	4.11966	4.02096	4.18134	4.31443	4.40675	4.6969	4.92156	5.1666	5.54154	5.78945	5.83067	6.13748	6.34354	6.44556	6.4938	6.76091	6.52779	6.10063	6.23946	6.0968
Sweden		2.0745	2.04197	1.88243	1.93752	2.03011	2.16753	2.19951	2.26714	2.23013	2.19853	2.21898	2.21453	2.24492	2.24428	2.25953	2.30952	2.27326	2.31767	2.40288	2.36802	2.27081	2.40492	2.27707	2.16972	2.30924	2.33275	2.21398	2.28591	2.22166	2.05075	2.22204	2.14353
Switzerland		1.13929	1.05743	1.03484	1.08662	1.06238	1.15513	1.16494	1.16849	1.18795	1.1524	1.18118	1.22301	1.23497	1.22616	1.24585	1.23972	1.21469	1.23543	1.26465	1.32588	1.29678	1.35071	1.28496	1.30302	1.31289	1.26341	1.28603	1.3027	1.31995	1.2873	1.26518	1.25502
Turkey		1.04087	0.97646	1.12445	1.16247	1.22581	1.33405	1.49782	1.65551	1.70408	1.80295	1.97311	2.06439	2.12734	2.32763	2.22973	2.48993	2.74792	2.92616	2.99442	2.90565	3.16279	2.89384	3.14597	3.31735	3.51199	3.73432	4.07083	4.4552	4.29029	4.29655	4.48981	4.95162
United Kingdom		8.84074	8.51623	8.37158	8.40572	8.45009	8.73387	8.90013	9.04893	9.05235	9.29279	9.27058	9.51965	9.27266	9.56983	9.53401	9.4535	10.0481	9.75484	9.74074	9.79273	9.72914	9.88082	9.93318	9.97834	10.0277	9.84463	9.72876	9.56105	9.28664	8.78475	8.91401	8.51752
Eurasia		46.7351	47.2209	49.262	50.4184	53.4155	55.6886	57.4755	58.8237	60.7598	60.0692	60.9753	57.603	52.9978	47.6044	44.0328	42.2231	39.752	37.601	37.075	38.1443	39.19	38.8675	40.231	41.6445	42.92	43.007	42.595	44.0249	45.0622	40.372	42.8365	NA
Armenia		--	--	--	--	--	--	--	--	--	--	--	--	0.19984	0.14554	0.13423	0.13419	0.16968	0.14562	0.15267	0.15564	0.16247	0.1646	0.16393	0.17541	0.18063	0.20159	0.2038	0.22112	0.21598	0.20127	0.21196	NA
Azerbaijan		--	--	--	--	--	--	--	--	--	--	--	--	0.9918	0.76598	0.76195	0.73143	0.64552	0.63778	0.5443	0.56342	0.52002	0.52053	0.59178	0.60157	0.63699	0.65892	0.69878	0.59244	0.71848	0.56673	0.55567	NA
Belarus		--	--	--	--	--	--	--	--	--	--	--	--	1.52941	1.24347	1.07594	1.00994	1.00954	0.99603	0.97627	0.98677	1.05214	0.96268	0.90747	0.98457	0.95177	1.12403	1.15433	1.15134	1.12029	1.05118	1.13123	NA
Estonia		--	--	--	--	--	--	--	--	--	--	--	--	0.29165	0.18966	0.18979	0.1756	0.22544	0.21632	0.23121	0.19226	0.19633	0.2039	0.2034	0.22366	0.23265	0.23315	0.22655	0.23105	0.22402	0.19773	0.22299	0.23283
Former U.S.S.R.		46.7351	47.2209	49.262	50.4184	53.4155	55.6886	57.4755	58.8237	60.7598	60.0692	60.9753	57.603	--	--	--	--	--	--	--	--	--	--	--	--	--	--	--	--	--	--	--	--
Georgia		--	--	--	--	--	--	--	--	--	--	--	--	0.32759	0.19109	0.1548	0.15086	0.15873	0.16348	0.16531	0.14406	0.13752	0.12619	0.14833	0.13288	0.1357	0.15153	0.13936	0.16648	0.1737	0.17753	0.19191	NA
Kazakhstan		--	--	--	--	--	--	--	--	--	--	--	--	3.42894	2.85513	2.29445	1.90435	1.96301	1.68726	1.62533	1.79159	1.83351	1.93523	1.99277	1.82516	2.18332	2.23411	2.37702	2.38347	2.36741	2.14318	2.25517	NA
Kyrgyzstan		--	--	--	--	--	--	--	--	--	--	--	--	0.29244	0.24353	0.2343	0.19044	0.22943	0.21813	0.21854	0.23592	0.24136	0.22777	0.19289	0.20385	0.21189	0.21021	0.21543	0.20304	0.17757	0.20701	0.20166	NA
Latvia		--	--	--	--	--	--	--	--	--	--	--	--	0.22314	0.16423	0.16171	0.17263	0.17215	0.16175	0.16027	0.14799	0.15412	0.16092	0.154	0.16071	0.17574	0.18543	0.18448	0.17261	0.16337	0.16488	0.16082	NA
Lithuania		--	--	--	--	--	--	--	--	--	--	--	--	0.47702	0.37634	0.35493	0.37862	0.3609	0.35896	0.39095	0.30442	0.2973	0.31679	0.34054	0.35264	0.35316	0.35257	0.35277	0.38586	0.37472	0.32429	0.26217	NA
Moldova		--	--	--	--	--	--	--	--	--	--	--	--	0.28316	0.20184	0.15647	0.1392	0.15137	0.15359	0.13853	0.11022	0.11014	0.10728	0.11896	0.1305	0.12268	0.1293	0.13827	0.12851	0.13351	0.11866	0.1186	NA
Russia		--	--	--	--	--	--	--	--	--	--	--	--	34.1164	30.5845	29.2258	27.9412	25.9227	24.3934	24.269	25.335	26.1393	25.7065	26.6626	27.4133	28.1458	27.9222	27.6869	28.6902	29.6325	27.6896	29.3218	32.771
Tajikistan		--	--	--	--	--	--	--	--	--	--	--	--	0.28994	0.25421	0.25274	0.20849	0.22971	0.21884	0.2264	0.24174	0.23909	0.24705	0.25201	0.27054	0.27419	0.28425	0.28025	0.27243	0.25661	0.18682	0.19051	NA
Turkmenistan		--	--	--	--	--	--	--	--	--	--	--	--	0.31126	0.27038	0.28682	0.30405	0.29793	0.30586	0.28061	0.31785	0.40112	0.50227	0.58452	0.75923	0.80707	0.83243	0.84142	0.89993	0.93194	0.88651	0.92312	NA
Ukraine		--	--	--	--	--	--	--	--	--	--	--	--	8.57337	8.08747	7.00352	6.91332	6.33645	6.06835	5.85075	5.75359	5.75077	5.64106	5.82163	6.2826	6.25436	6.32588	5.86877	6.29988	6.22468	4.45821	5.09354	NA
Uzbekistan		--	--	--	--	--	--	--	--	--	--	--	--	1.66187	2.03098	1.74539	1.8688	1.8794	1.87558	1.84477	1.86382	1.95472	2.04481	2.09616	2.12792	2.25405	2.1614	2.22683	2.22658	2.34739	1.99839	1.99535	NA
Middle East		5.83749	6.15628	6.37354	7.18191	7.85076	8.55686	9.16563	9.74435	10.3252	10.8757	11.2182	11.3588	12.2724	11.386	13.5777	13.8082	14.566	15.6183	16.2905	16.6412	17.3507	17.9732	19.015	19.8152	20.9646	22.8694	23.9417	23.9436	26.0992	27.4475	28.7337	NA
Bahrain		0.13752	0.15787	0.16794	0.17792	0.17157	0.20492	0.22078	0.26522	0.22898	0.23439	0.25635	0.28713	0.24078	0.27663	0.28338	0.28363	0.28439	0.33517	0.35172	0.35646	0.36474	0.37722	0.39762	0.40773	0.41884	0.44726	0.48868	0.51317	0.53474	0.54327	0.55759	NA
Iran		1.58261	1.48862	1.70731	2.09302	2.22534	2.39652	2.42887	2.54105	2.70365	2.98498	3.10319	3.23565	3.35666	3.23408	3.68642	3.82582	3.96101	4.43353	4.58254	4.84077	5.02081	5.38611	5.88847	6.1875	6.40678	7.33526	7.67976	7.89703	8.09856	9.04268	9.10777	NA
Iraq		0.52402	0.48294	0.4624	0.55081	0.53817	0.56653	0.62292	0.63925	0.76751	0.82522	0.91771	0.6001	0.83887	0.84464	1.10244	1.13058	1.12469	1.04127	1.05605	1.07373	1.08419	1.13411	1.14428	1.0122	1.12508	1.23888	1.22646	1.30916	1.34034	1.45744	1.50018	NA
Israel		0.35096	0.36699	0.37468	0.36977	0.3814	0.35678	0.37165	0.39237	0.42507	0.44373	0.45182	0.47963	0.54028	0.53244	0.61975	0.62197	0.66144	0.71418	0.7261	0.73572	0.81131	0.87409	0.84092	0.85309	0.8555	0.87197	0.88416	0.91127	0.83252	0.87707	0.94537	0.97415
Jordan		0.07704	0.09157	0.10455	0.11201	0.11582	0.12027	0.12935	0.14108	0.13173	0.13508	0.14553	0.1376	0.16057	0.14067	0.1836	0.1931	0.20535	0.19888	0.21528	0.21447	0.22545	0.2202	0.23062	0.25148	0.27821	0.29423	0.30837	0.30975	0.30782	0.31309	0.32667	NA
Kuwait		0.48089	0.35214	0.35013	0.3885	0.4067	0.40268	0.45144	0.53896	0.61897	0.6963	0.44637	0.21583	0.3488	0.41377	0.57307	0.59178	0.74935	0.798	0.84566	0.86067	0.90963	0.88264	0.88761	0.96046	1.00698	1.14679	1.13313	1.12475	1.16169	1.21498	1.28347	NA
Lebanon		0.10473	0.09745	0.09447	0.09773	0.09399	0.10834	0.10323	0.10697	0.09781	0.07744	0.07142	0.11807	0.11896	0.14042	0.17031	0.18276	0.19219	0.21977	0.22429	0.23013	0.23433	0.22499	0.22859	0.23803	0.22844	0.21854	0.19424	0.17922	0.18233	0.28324	0.27604	NA
Oman		0.06467	0.06873	0.08358	0.09677	0.10035	0.11874	0.13477	0.13861	0.13042	0.16839	0.18358	0.20997	0.20445	0.22356	0.23685	0.22439	0.23107	0.26757	0.34683	0.30098	0.34089	0.34692	0.36024	0.3566	0.38096	0.48045	0.55125	0.58188	0.68767	0.75002	0.86701	NA
Palestinian Territories		--	--	--	--	--	--	--	--	--	--	--	--	--	--	--	--	--	0.00957	0.01476	0.01499	0.01978	0.0266	0.02469	0.02643	0.04029	0.04934	0.05351	0.05453	0.05852	0.04525	0.04585	NA
Qatar		0.2143	0.202	0.23742	0.22323	0.26846	0.24321	0.25573	0.26227	0.26799	0.27809	0.34252	0.39711	0.47494	0.53468	0.55856	0.5629	0.57852	0.61006	0.62262	0.5938	0.64476	0.5025	0.5271	0.58437	0.70528	0.88637	0.95057	0.99146	1.01462	1.08657	1.10456	NA
Saudi Arabia		1.66331	2.02483	1.96743	2.12312	2.46675	2.71018	3.01461	3.07255	3.18356	3.12648	3.3474	3.49904	3.6636	2.90916	3.90046	3.82572	4.10441	4.3656	4.54323	4.60224	4.85276	5.1387	5.38353	5.76125	6.20771	6.52548	6.8456	6.18472	7.45005	7.22524	7.84894	8.75755
Syria		0.27405	0.28914	0.29523	0.33399	0.36831	0.38492	0.38388	0.43466	0.45274	0.48254	0.56278	0.52102	0.53779	0.5452	0.63357	0.60911	0.65218	0.69498	0.7525	0.77364	0.78206	0.76222	0.8197	0.82694	0.84518	0.80437	0.80649	0.80705	0.81778	0.9479	1.03228	NA
United Arab Emirates		0.26731	0.43622	0.41384	0.5109	0.58179	0.79708	0.90726	1.07115	1.17287	1.2686	1.22933	1.49165	1.61408	1.46204	1.49157	1.60656	1.66878	1.77107	1.83821	1.86471	1.8663	1.89112	2.05573	2.1047	2.21903	2.31365	2.53901	2.82421	3.29263	3.37142	3.53612	NA
Yemen		0.09609	0.09778	0.11456	0.10413	0.13211	0.14669	0.14115	0.14022	0.14387	0.15439	0.16025	0.16598	0.17264	0.12871	0.13769	0.14988	0.15258	0.15864	0.17072	0.17888	0.19367	0.20573	0.22587	0.24444	0.2463	0.25679	0.28046	0.25545	0.31997	0.28928	0.30183	NA
Africa		6.79621	6.99771	7.56437	7.91308	8.32584	8.50477	8.74902	8.97317	9.32286	9.27496	9.46917	9.84775	9.93929	9.3472	10.4021	10.6526	10.9284	11.4017	11.2967	11.6327	12.0387	12.6264	12.7111	13.3494	13.9535	14.4894	14.5818	14.9946	16.094	15.9245	16.3268	NA
Algeria		0.80085	0.68005	0.9578	1.07399	1.15572	1.04784	1.0604	1.1349	1.20786	1.17025	1.2169	1.35505	1.29959	1.08345	1.23763	1.30333	1.26434	1.2026	1.25334	1.25165	1.23857	1.25615	1.27659	1.2927	1.26393	1.48134	1.54318	1.61954	1.72123	1.7988	1.79829	NA
Angola		0.05816	0.05805	0.0618	0.06667	0.05992	0.07307	0.07392	0.07532	0.07828	0.07641	0.07983	0.08283	0.08553	0.08089	0.08235	0.0876	0.08436	0.09326	0.08492	0.09419	0.09094	0.1193	0.12741	0.13525	0.14463	0.14764	0.1659	0.1862	0.19718	0.20883	0.23924	NA
Benin		0.00659	0.00662	0.00469	0.00686	0.00669	0.00787	0.00764	0.00598	0.00716	0.00768	0.00889	0.01017	0.01141	0.01244	0.01308	0.01428	0.01534	0.01668	0.01787	0.01954	0.02426	0.02449	0.02594	0.03053	0.03556	0.03725	0.04391	0.04767	0.05046	0.06582	0.07364	NA
Botswana		0.01518	0.01542	0.01436	0.014	0.01442	0.01906	0.02021	0.02299	0.02467	0.0282	0.03297	0.0342	0.03907	0.0369	0.03956	0.04291	0.03967	0.04159	0.04732	0.04831	0.05755	0.05139	0.05201	0.05007	0.05715	0.06134	0.06223	0.06069	0.06339	0.06514	0.0743	NA
Burkina Faso		0.00613	0.00617	0.00618	0.00621	0.00621	0.00591	0.00692	0.00722	0.00738	0.0066	0.00705	0.00812	0.00821	0.00866	0.01017	0.0104	0.01089	0.01705	0.01562	0.01608	0.01662	0.01662	0.01729	0.01803	0.01832	0.01877	0.01862	0.02082	0.02012	0.02564	0.02599	NA
Burundi		0.00159	0.0018	0.00159	0.00202	0.00259	0.00277	0.00281	0.00319	0.00471	0.00505	0.00548	0.00606	0.00577	0.00427	0.00674	0.00658	0.00668	0.00676	0.00671	0.00661	0.00658	0.00712	0.00727	0.00729	0.00667	0.00664	0.00644	0.00615	0.00406	0.00439	0.00468	NA
Cameroon		0.04713	0.05217	0.06048	0.06024	0.06116	0.06392	0.06991	0.06649	0.06631	0.07724	0.07769	0.07856	0.0788	0.05979	0.07455	0.07634	0.07601	0.08	0.08001	0.07822	0.08132	0.08165	0.07808	0.08387	0.08674	0.08577	0.09881	0.09902	0.10565	0.10857	0.12487	NA
Cape Verde		0.00454	0.00453	0.002	0.00196	0.00239	0.00236	0.0008	0.00089	0.00128	0.00137	0.00146	0.0015	0.00159	0.00137	0.00178	0.00174	0.00184	0.00184	0.00185	0.00185	0.00318	0.00214	0.00228	0.00227	0.00433	0.00373	0.0042	0.00493	0.00507	0.00552	0.00552	NA
Central African Republic		0.00274	0.00334	0.00358	0.00376	0.00363	0.00358	0.00427	0.0039	0.00412	0.00396	0.00424	0.00441	0.0045	0.00459	0.00484	0.00484	0.00489	0.005	0.00507	0.00507	0.00539	0.00549	0.00565	0.00567	0.00577	0.00565	0.00592	0.00633	0.00647	0.00609	0.00609	NA
Chad		0.00407	0.00389	0.00389	0.00389	0.00186	0.00222	0.00399	0.00348	0.00232	0.00238	0.00493	0.00461	0.00464	0.00194	0.00248	0.00247	0.00255	0.00257	0.00257	0.00257	0.00278	0.00284	0.00293	0.00293	0.00272	0.00302	0.00325	0.00379	0.00362	0.00364	0.00364	NA
Comoros		0.00063	0.00063	0.00063	0.00063	0.00064	0.00055	0.00055	0.00087	0.00091	0.00092	0.00118	0.00114	0.00114	0.0009	0.00118	0.00118	0.00118	0.00118	0.00123	0.00123	0.00136	0.00141	0.00146	0.00147	0.00151	0.00161	0.00163	0.00204	0.00214	0.00214	0.00186	NA
Congo (Brazzaville)		0.01194	0.01421	0.01282	0.01141	0.01205	0.01726	0.01512	0.01842	0.01503	0.01726	0.01927	0.01766	0.01681	0.01302	0.01455	0.01472	0.01546	0.01529	0.01435	0.01184	0.01302	0.016	0.0154	0.01722	0.01848	0.02482	0.02843	0.03386	0.03906	0.04784	0.06727	NA
Congo (Kinshasa)		0.09072	0.09277	0.09408	0.09741	0.09554	0.09769	0.10398	0.09915	0.10981	0.11239	0.10628	0.10518	0.11521	0.1074	0.09838	0.10828	0.10937	0.09877	0.09347	0.09292	0.09171	0.08267	0.07982	0.08113	0.09578	0.09882	0.1004	0.10656	0.10331	0.10511	0.11299	NA
Cote dIvoire (IvoryCoast)		0.07388	0.08135	0.07638	0.07388	0.06544	0.07711	0.07858	0.08658	0.0905	0.09075	0.07791	0.06585	0.06377	0.06313	0.07474	0.08127	0.10143	0.09546	0.09637	0.12522	0.13277	0.10998	0.10706	0.10877	0.11505	0.11335	0.114	0.11957	0.13064	0.12995	0.12381	NA
Djibouti		0.02205	0.0177	0.01779	0.01314	0.01096	0.01082	0.00974	0.00996	0.00973	0.02304	0.02326	0.02353	0.02359	0.02266	0.02427	0.02416	0.02416	0.0245	0.0245	0.0245	0.02465	0.02502	0.02506	0.02559	0.0259	0.02565	0.02374	0.02319	0.01642	0.01667	0.01667	NA
Egypt		0.70639	0.82834	0.92715	1.05147	1.15066	1.21268	1.24476	1.29745	1.30184	1.34836	1.43795	1.43262	1.42707	1.37148	1.55635	1.58777	1.72707	1.78967	1.84917	1.92281	2.0052	2.22517	2.25765	2.43298	2.58248	2.68931	2.53821	2.70984	3.1936	3.20306	3.30724	NA
Equatorial Guinea		0.00085	0.00084	0.00106	0.00106	0.00106	0.0012	0.00121	0.00116	0.00116	0.00168	0.00173	0.00182	0.00172	0.00181	0.00186	0.00185	0.0019	0.00204	0.00278	0.00278	0.00433	0.00354	0.04942	0.05064	0.0059	0.05036	0.05045	0.0588	0.05765	0.06384	0.06934	NA
Eritrea		--	--	--	--	--	--	--	--	--	--	--	--	--	--	0.01373	0.0152	0.01553	0.01574	0.01685	0.01422	0.00888	0.01052	0.00977	0.01103	0.01037	0.01036	0.01035	0.00973	0.01108	0.00714	0.00701	NA
Ethiopia		0.03009	0.03056	0.03403	0.03878	0.03855	0.04553	0.04451	0.05018	0.04922	0.05208	0.05321	0.04599	0.06159	0.05553	0.044	0.04756	0.03972	0.04016	0.0521	0.06112	0.06451	0.06956	0.0745	0.08134	0.08518	0.09097	0.10302	0.11177	0.13166	0.13029	0.13678	NA
Gabon		0.02842	0.03203	0.03022	0.04146	0.03733	0.03172	0.02869	0.03333	0.0353	0.04399	0.04332	0.0443	0.04559	0.04055	0.04429	0.04181	0.04339	0.04574	0.04426	0.03995	0.03684	0.0382	0.03796	0.03898	0.0393	0.03826	0.04223	0.04342	0.05311	0.04194	0.04543	NA
Gambia, The		0.00224	0.00223	0.00223	0.00223	0.00246	0.00242	0.00225	0.0026	0.00269	0.00265	0.00271	0.00282	0.00282	0.00299	0.00331	0.00309	0.00308	0.00309	0.00327	0.00327	0.00365	0.00392	0.00401	0.00406	0.00408	0.00423	0.00453	0.00559	0.00583	0.00623	0.00677	NA
Ghana		0.08608	0.08299	0.08261	0.05537	0.05144	0.05842	0.07788	0.08511	0.09327	0.10297	0.10037	0.10433	0.11333	0.10665	0.115	0.11703	0.12352	0.12183	0.09528	0.11604	0.14286	0.1419	0.13071	0.12545	0.14495	0.14937	0.15015	0.13327	0.14904	0.17244	0.19467	NA
Guinea		0.01374	0.0135	0.01372	0.01373	0.01406	0.01239	0.016	0.01676	0.01713	0.01665	0.02186	0.01738	0.01777	0.01674	0.0187	0.01865	0.01884	0.01978	0.0201	0.02096	0.02176	0.02345	0.02392	0.02207	0.02363	0.02358	0.02306	0.02344	0.02427	0.02445	0.02447	NA
Guinea-Bissau		0.00123	0.00123	0.00125	0.00125	0.00168	0.00181	0.00142	0.00262	0.00293	0.00307	0.00388	0.00397	0.004	0.00343	0.00437	0.00432	0.00436	0.00437	0.00437	0.00437	0.00485	0.0049	0.00508	0.00521	0.00518	0.00538	0.00533	0.00551	0.00541	0.00557	0.00557	NA
Kenya		0.09913	0.10191	0.10094	0.10042	0.09909	0.10318	0.10949	0.10052	0.1132	0.12209	0.12431	0.11496	0.12362	0.12181	0.13247	0.13777	0.14337	0.13408	0.14811	0.14138	0.14224	0.14413	0.14934	0.16118	0.16875	0.18298	0.20102	0.2022	0.18836	0.19759	0.21986	NA
Lesotho		0.00212	0.00192	0.00212	0.00212	0.00212	0.00219	0.0022	0.0022	0.0015	0.0022	0.00285	0.0029	0.00306	0.00311	0.00352	0.00357	0.0036	0.00355	0.0032	0.00467	0.00588	0.00598	0.00615	0.00635	0.00595	0.00662	0.00531	0.00566	0.00587	0.00552	0.00993	NA
Liberia		0.03184	0.02937	0.02955	0.02942	0.02581	0.0262	0.02118	0.01655	0.02054	0.01685	0.00814	0.00476	0.00483	0.0049	0.00533	0.00533	0.00553	0.00559	0.00577	0.00577	0.00616	0.00652	0.00705	0.00727	0.00735	0.00745	0.00858	0.00942	0.00844	0.00775	0.00753	NA
Libya		0.39743	0.3575	0.3539	0.38078	0.38419	0.42109	0.44198	0.45225	0.46429	0.48088	0.51011	0.53234	0.49646	0.44235	0.53086	0.55334	0.58466	0.61762	0.59319	0.55764	0.62988	0.66709	0.69699	0.68428	0.75794	0.77201	0.73147	0.75824	0.73771	0.77865	0.83996	NA
Madagascar		0.01891	0.01648	0.0152	0.01936	0.01928	0.02096	0.01523	0.02076	0.02275	0.01724	0.01698	0.01744	0.01853	0.01785	0.0209	0.02168	0.02227	0.02273	0.02332	0.02339	0.03093	0.03335	0.03755	0.03941	0.04278	0.04156	0.04108	0.04182	0.04563	0.03285	0.03292	NA
Malawi		0.01192	0.01244	0.01174	0.01072	0.01064	0.01132	0.01148	0.01196	0.01164	0.01306	0.0149	0.01725	0.01741	0.0165	0.01847	0.01906	0.01936	0.01949	0.02077	0.02152	0.02275	0.02291	0.02391	0.0244	0.02697	0.02836	0.02907	0.02984	0.03121	0.02984	0.03061	NA
Mali		0.00704	0.00907	0.00726	0.00741	0.00754	0.00814	0.00675	0.00767	0.00482	0.00835	0.00844	0.00868	0.00904	0.0093	0.00953	0.00956	0.00958	0.00988	0.01	0.01001	0.01023	0.01029	0.01102	0.0111	0.01144	0.0125	0.01163	0.01188	0.01213	0.01239	0.01256	NA
Mauritania		0.0092	0.00898	0.00909	0.00904	0.01316	0.01301	0.00741	0.01022	0.01311	0.01524	0.01356	0.0143	0.04602	0.03934	0.04727	0.04792	0.04817	0.04856	0.04874	0.04874	0.04976	0.04976	0.04748	0.04879	0.04151	0.04908	0.04206	0.03878	0.0438	0.02784	0.0279	NA
Mauritius		0.01366	0.01206	0.012	0.01287	0.01342	0.01444	0.01754	0.0155	0.0212	0.0251	0.02774	0.02774	0.03286	0.03086	0.03249	0.03554	0.03538	0.03581	0.03691	0.04068	0.05334	0.05851	0.05433	0.0567	0.05767	0.06037	0.06368	0.06784	0.06984	0.06384	0.0668	NA
Morocco		0.22621	0.21636	0.2182	0.22408	0.20998	0.22413	0.25189	0.25296	0.26609	0.29726	0.30899	0.31944	0.32663	0.30248	0.39049	0.37388	0.39885	0.40594	0.41548	0.43711	0.44701	0.4813	0.48821	0.49124	0.4923	0.49773	0.51652	0.52846	0.59814	0.64331	0.67296	NA
Mozambique		0.17546	0.06689	0.06445	0.08622	0.03419	0.03311	0.01812	0.01736	0.02463	0.02016	0.02036	0.02085	0.02042	0.02184	0.02133	0.02241	0.02159	0.02587	0.03217	0.07782	0.10073	0.13093	0.13324	0.13221	0.14246	0.15798	0.17698	0.18214	0.16984	0.18321	0.18078	NA
Namibia		--	--	--	--	--	--	--	--	--	--	0.03435	0.01809	0.01694	0.01796	0.0203	0.03191	0.03087	0.03002	0.03332	0.03856	0.0415	0.04742	0.0503	0.05393	0.0569	0.05861	0.0626	0.06488	0.0726	0.06967	0.06538	NA
Niger		0.00915	0.00951	0.00999	0.01031	0.01085	0.01088	0.00918	0.01015	0.01359	0.01419	0.01457	0.01466	0.01486	0.015	0.0154	0.01536	0.01526	0.01508	0.01515	0.01495	0.01511	0.0155	0.01645	0.01691	0.0182	0.01724	0.0169	0.01752	0.01309	0.01809	0.01834	NA
Nigeria		0.42228	0.51801	0.51696	0.51838	0.55649	0.59952	0.58736	0.61963	0.66323	0.71807	0.69886	0.7694	0.78635	0.74862	0.7432	0.83268	0.8494	0.85069	0.81581	0.81752	0.80941	0.91104	0.93475	0.97853	0.98351	1.08137	1.02946	0.98637	1.0381	0.67651	0.72951	NA
Reunion		0.01195	0.01261	0.01375	0.01546	0.01624	0.01672	0.01671	0.01822	0.01952	0.02169	0.02318	0.02508	0.02604	0.02653	0.03262	0.03241	0.0335	0.03404	0.04271	0.04275	0.04413	0.04593	0.04587	0.04595	0.04641	0.04728	0.0478	0.04898	0.05047	0.05208	0.05203	NA
Rwanda		0.00354	0.00645	0.00646	0.00729	0.01097	0.01128	0.01098	0.0113	0.01132	0.01174	0.01199	0.01214	0.01245	0.00873	0.01151	0.01169	0.01151	0.01186	0.01221	0.01184	0.01234	0.01233	0.01248	0.01278	0.01204	0.01248	0.01237	0.01108	0.0113	0.01213	0.01219	NA
Saint Helena		0	4e-05	4e-05	4e-05	4e-05	4e-05	4e-05	9e-05	9e-05	9e-05	9e-05	4e-05	4e-05	9e-05	9e-05	9e-05	9e-05	9e-05	9e-05	9e-05	0.00031	0.00018	0.00018	0.00018	0.00013	0.00018	0.00016	0.00018	0.00014	0.00013	0.00013	NA
Sao Tome and Principe		0.00054	0.00054	0.00055	0.00053	0.00055	0.00057	0.00056	0.00057	0.00057	0.00057	0.00105	0.0011	0.00114	0.00109	0.00119	0.00119	0.00118	0.00119	0.00118	0.0012	0.00138	0.00132	0.00139	0.0014	0.00138	0.00141	0.00158	0.00194	0.00196	0.00196	0.00195	NA
Senegal		0.03698	0.03586	0.03666	0.03503	0.04167	0.04088	0.04037	0.04066	0.03474	0.03616	0.03623	0.03353	0.04079	0.03462	0.05136	0.05531	0.05551	0.05104	0.05428	0.05974	0.06366	0.06364	0.06656	0.0685	0.07829	0.08372	0.0858	0.08716	0.08835	0.08611	0.08664	NA
Seychelles		0.00316	0.00253	0.00234	0.00405	0.00426	0.00437	0.00438	0.00467	0.00647	0.00686	0.0063	0.00678	0.00697	0.0071	0.00725	0.00729	0.00727	0.00782	0.00782	0.00782	0.0081	0.00835	0.01215	0.01185	0.01228	0.01209	0.016	0.01338	0.01472	0.01593	0.01342	NA
Sierra Leone		0.01057	0.01063	0.01141	0.01076	0.01071	0.01167	0.01259	0.01352	0.01472	0.01469	0.01482	0.01553	0.01135	0.00935	0.01052	0.01216	0.01213	0.01243	0.01247	0.01247	0.01335	0.01366	0.01389	0.01421	0.01682	0.01674	0.01659	0.01786	0.02122	0.01985	0.02034	NA
Somalia		0.01656	0.01929	0.01893	0.0185	0.0192	0.01888	0.02008	0.0149	0.01508	0.01535	0.01402	0.00835	0.00776	0.00767	0.00803	0.00803	0.00803	0.00803	0.00803	0.00803	0.00998	0.00998	0.00998	0.01009	0.00996	0.0101	0.01059	0.01194	0.01138	0.01125	0.01125	NA
South Africa		2.72828	2.95592	3.15803	3.18719	3.4528	3.51604	3.61766	3.66845	3.78098	3.55047	3.52342	3.67624	3.76193	3.67461	4.08411	4.10982	4.16526	4.55692	4.34929	4.46324	4.58373	4.64708	4.53578	4.87605	5.21505	5.12043	5.28755	5.41603	5.72952	5.62826	5.59303	NA
Sudan and South Sudan		0.05224	0.05595	0.06067	0.05867	0.05436	0.06154	0.06886	0.06705	0.07187	0.06886	0.06892	0.09321	0.08713	0.07537	0.07559	0.07125	0.07188	0.07335	0.07365	0.07956	0.10796	0.13557	0.13991	0.1539	0.1649	0.17682	0.19666	0.19178	0.2123	0.29356	0.30792	NA
Swaziland		0.01009	0.00962	0.00926	0.00736	0.00863	0.01076	0.01038	0.01143	0.01206	0.01258	0.01225	0.01219	0.0122	0.01112	0.01575	0.01567	0.01456	0.01122	0.01122	0.01677	0.01637	0.0165	0.0166	0.01529	0.01457	0.01435	0.01595	0.01813	0.01825	0.0174	0.01729	NA
Tanzania		0.03903	0.04366	0.04296	0.03983	0.04243	0.04312	0.04934	0.04561	0.04835	0.04975	0.0545	0.04977	0.05194	0.05324	0.04931	0.04887	0.05138	0.04795	0.05498	0.0582	0.0582	0.06861	0.07525	0.07626	0.08168	0.0904	0.09356	0.10957	0.11714	0.12382	0.12017	NA
Togo		0.00961	0.00903	0.00899	0.00932	0.01099	0.01074	0.00911	0.00872	0.00909	0.01039	0.01032	0.01682	0.01229	0.01038	0.01126	0.01229	0.01183	0.01119	0.01226	0.01739	0.02191	0.01588	0.02058	0.03206	0.03397	0.03354	0.03483	0.03759	0.04271	0.02184	0.02309	NA
Tunisia		0.12811	0.14107	0.13426	0.1532	0.16706	0.17057	0.18062	0.16845	0.17914	0.20375	0.20195	0.1976	0.19069	0.19936	0.2375	0.21225	0.23096	0.26778	0.28711	0.28948	0.30098	0.33625	0.33847	0.33078	0.33365	0.35827	0.33345	0.29423	0.3135	0.30028	0.30913	NA
Uganda		0.01594	0.01135	0.01296	0.01232	0.01351	0.01423	0.01522	0.01369	0.01772	0.01779	0.01941	0.0209	0.02324	0.02214	0.02433	0.02472	0.02541	0.02708	0.02918	0.02925	0.03282	0.03501	0.0365	0.03925	0.04059	0.04166	0.03901	0.04344	0.04429	0.05992	0.0625	NA
Western Sahara		0.00236	0.00235	0.00264	0.00256	0.00265	0.0027	0.00271	0.00279	0.00283	0.00283	0.00296	0.00296	0.003	0.00281	0.00292	0.00313	0.00313	0.00313	0.00313	0.00313	0.0036	0.00366	0.00366	0.00366	0.00364	0.00412	0.00365	0.00383	0.00364	0.00365	0.00365	NA
Zambia		0.13273	0.13411	0.13764	0.13438	0.13155	0.13022	0.12981	0.12025	0.12248	0.10338	0.1115	0.1076	0.11238	0.10341	0.1003	0.10138	0.09752	0.10684	0.10194	0.09909	0.09924	0.10487	0.10799	0.11254	0.11469	0.12143	0.12701	0.12644	0.12723	0.12534	0.13719	NA
Zimbabwe		0.15492	0.15579	0.1451	0.16407	0.155	0.15409	0.18422	0.19653	0.20166	0.20237	0.21972	0.23299	0.22742	0.20708	0.19898	0.19764	0.20376	0.19988	0.19983	0.22761	0.21215	0.19942	0.19982	0.19783	0.17606	0.19331	0.17486	0.17422	0.15068	0.15486	0.16368	NA
Asia & Oceania		48.8999	49.7354	50.4256	52.1346	56.596	58.0845	60.467	63.4911	68.1519	70.6206	73.4024	76.8408	79.5424	80.7066	88.985	93.4534	96.853	102.768	103.857	106.644	110.699	113.694	119.597	127.505	137.708	148.731	157.615	165.674	171.984	182.71	193.615	NA
Afghanistan		0.02698	0.03036	0.03234	0.0387	0.03913	0.03872	0.03976	0.06343	0.11162	0.1103	0.10904	0.04788	0.03233	0.03116	0.03132	0.02652	0.02645	0.02533	0.02461	0.02484	0.02384	0.01768	0.01823	0.01629	0.01612	0.01698	0.01854	0.0265	0.02967	0.09823	0.10445	NA
American Samoa		0.00593	0.00692	0.00962	0.00603	0.00695	0.00652	0.00673	0.00686	0.00676	0.00776	0.00807	0.00807	0.00827	0.00797	0.00803	0.0079	0.00801	0.00803	0.00803	0.00803	0.00784	0.00786	0.00799	0.00799	0.00795	0.00846	0.00861	0.00922	0.00856	0.00861	0.00417	NA
Australia		2.74282	2.82451	2.89413	2.95852	3.23291	3.26402	3.24834	3.43414	3.41915	3.61846	3.71364	3.70926	3.8123	3.91522	3.92119	4.03627	4.21412	4.54984	4.58179	4.80368	4.83335	5.00345	5.07292	5.1165	5.41692	5.64958	5.72146	5.9419	5.7874	5.76642	5.81146	5.60117
Bangladesh		0.12797	0.13932	0.15025	0.13998	0.16701	0.17329	0.18801	0.20723	0.22947	0.25175	0.25342	0.25726	0.28648	0.29877	0.33952	0.38176	0.38902	0.40315	0.41911	0.46537	0.50385	0.55256	0.584	0.63488	0.6751	0.71835	0.78022	0.81363	0.88801	0.96407	0.98901	NA
Bhutan		0.00015	0.00045	0.00058	0.00053	0.00048	0.00062	0.00278	0.00965	0.01213	0.01228	0.01303	0.01324	0.01349	0.01323	0.01482	0.01579	0.01751	0.01757	0.01704	0.0172	0.01725	0.01865	0.02075	0.02275	0.02039	0.02296	0.03515	0.04958	0.05312	0.05402	0.05681	NA
Brunei		0.08202	0.08518	0.09301	0.07288	0.06434	0.07673	0.05094	0.08183	0.07133	0.08277	0.07026	0.03869	0.05491	0.04865	0.05032	0.06192	0.05773	0.06159	0.05578	0.06268	0.0649	0.07311	0.08476	0.09008	0.10042	0.11918	0.18266	0.18816	0.19556	0.12763	0.14779	NA
Burma (Myanmar)		0.0695	0.07165	0.07937	0.09098	0.09891	0.10365	0.08891	0.08835	0.08415	0.08858	0.08565	0.08442	0.08816	0.09019	0.1107	0.11753	0.11905	0.12728	0.13868	0.14191	0.1675	0.16576	0.18845	0.2121	0.21775	0.28673	0.26736	0.28979	0.28615	0.24095	0.24075	NA
Cambodia		0.00455	0.0048	0.00534	0.00562	0.00614	0.00626	0.00653	0.00663	0.00691	0.00694	0.00702	0.00722	0.00744	0.00744	0.00763	0.02116	0.02339	0.02741	0.03201	0.03263	0.03411	0.0398	0.04281	0.04672	0.05206	0.05528	0.06078	0.06562	0.06871	0.06622	0.06118	NA
China		17.2874	17.192	17.9338	19.0097	20.4534	21.0082	22.2398	23.7615	25.4487	25.9604	26.001	27.3598	28.468	28.6451	32.4849	33.2497	34.9892	38.2719	39.5408	39.0181	40.9356	42.5802	47.2937	52.9612	59.474	67.9153	74.2813	79.3712	84.9461	94.3712	100.881	109.62
Cook Islands		0.00042	0.00084	0.00082	0.00083	0.00083	0.00083	0.00076	0.00076	0.00076	0.00067	0.00067	0.00056	0.00067	0.00067	0.00067	0.00067	0.00067	0.00067	0.00067	0.00067	0.0008	0.0008	0.0008	0.0008	0.00089	0.00098	0.00103	0.00096	0.00101	0.00101	0.00101	NA
Fiji		0.01529	0.01577	0.01546	0.0132	0.01452	0.01464	0.01766	0.01474	0.01498	0.01718	0.01895	0.01619	0.0166	0.01577	0.0182	0.01939	0.01996	0.01987	0.0193	0.02123	0.02432	0.02626	0.03022	0.03655	0.03957	0.03893	0.04065	0.0405	0.04348	0.02431	0.02342	NA
French Polynesia		0.00312	0.00461	0.00624	0.00842	0.01271	0.01117	0.01396	0.01424	0.01435	0.01439	0.01375	0.01363	0.01333	0.01245	0.01081	0.01142	0.01148	0.01149	0.01167	0.01102	0.01072	0.01065	0.01126	0.01361	0.01366	0.01478	0.01609	0.0161	0.01742	0.01682	0.0169	NA
Guam		0.05329	0.0745	0.05799	0.05546	0.01909	0.0094	0.01564	0.01085	0.01126	0.01071	0.02594	0.02942	0.0351	0.04637	0.06643	0.05038	0.04479	0.05113	0.0422	0.047	0.03928	0.04231	0.02882	0.0331	0.0263	0.02938	0.03058	0.02752	0.02386	0.01457	0.01304	NA
Hawaiian Trade Zone		0.09468	0.10902	0.10042	0.09487	0.11496	0.1103	0.06534	--	--	--	--	--	--	--	--	--	--	--	--	--	--	--	--	--	--	--	--	--	--	--	--	--
Hong Kong		0.2724	0.28356	0.31099	0.34283	0.35351	0.37015	0.39209	0.44013	0.49405	0.51427	0.50653	0.49495	0.55623	0.56629	0.59318	0.62864	0.68003	0.69036	0.72987	0.86455	0.80565	0.85755	0.92558	0.95826	1.06668	1.11214	1.09962	1.13409	1.0887	1.21474	1.26287	NA
India		4.04087	4.62703	4.73881	4.99261	5.65399	5.91415	6.35848	6.44899	7.04691	7.46151	7.87916	8.37387	8.85036	8.74138	9.95544	11.4432	10.8972	11.4863	12.0273	12.8689	13.3333	13.8372	13.6647	14.1135	15.3196	16.3315	17.6308	18.8138	19.903	21.417	21.9198	23.6107
Indonesia		1.16582	1.27211	1.30572	1.38502	1.46096	1.53516	1.65327	1.72279	1.84744	2.09257	2.30874	2.53466	2.63828	2.77514	3.10456	3.24227	3.53148	3.62664	3.50553	3.86352	3.87305	3.93491	4.08854	4.104	4.43032	4.64683	5.0977	5.32105	5.43696	5.80577	6.05509	NA
Japan		15.1976	15.121	14.5713	14.2931	15.6456	15.6905	15.7095	16.1997	17.2119	17.7497	18.7683	19.3188	19.3509	19.5332	20.335	20.942	21.3091	21.8442	21.4646	21.9438	22.4147	22.2031	22.1182	22.6048	23.242	23.1348	22.8699	23.0496	21.8926	20.6951	21.7727	20.8231
Kiribati		0.00034	0.0004	0.0004	0.0004	0.00029	0.00029	0.00026	0.00031	0.00031	0.00031	0.00031	0.00037	0.00031	0.00031	0.00031	0.00031	0.00031	0.00031	0.00031	0.00031	0.00035	0.00035	0.00045	0.00045	0.00045	0.00054	0.00054	0.00057	0.00053	0.00087	0.00087	NA
Korea, North		1.32754	1.37409	1.43933	1.50349	1.54723	1.62406	1.61938	1.56274	1.9215	1.57464	1.53212	1.49528	1.31677	1.21589	1.14549	1.06627	0.91771	0.83831	0.75979	0.82353	0.85941	0.88168	0.85064	0.87877	0.89887	0.93287	0.93706	0.80423	0.88522	0.8345	0.81923	NA
Korea, South		1.75836	1.82226	1.83276	2.01014	2.13481	2.30592	2.5749	2.81632	3.12305	3.39632	3.84131	4.34329	4.83041	5.39184	5.83614	6.3618	6.74567	7.32742	6.90261	7.47171	7.8348	8.10102	8.51247	8.76202	9.00854	9.33207	9.44994	9.83603	9.8871	9.97149	10.7827	11.1607
Laos		0.01311	0.01129	0.01159	0.01078	0.00965	0.00939	0.00969	0.0077	0.00724	0.00908	0.01017	0.01069	0.01087	0.01009	0.01107	0.0137	0.01608	0.01722	0.02297	0.02821	0.03448	0.03469	0.0359	0.03366	0.03681	0.03848	0.04005	0.04305	0.04681	0.04636	0.04524	NA
Macau		0.00698	0.00655	0.00699	0.00985	0.01087	0.00893	0.01241	0.01384	0.01374	0.01474	0.01513	0.0152	0.0157	0.01616	0.01852	0.01879	0.0209	0.0214	0.02302	0.02444	0.02211	0.02369	0.02586	0.02686	0.03248	0.02857	0.03522	0.03774	0.04144	0.03313	0.03069	NA
Malaysia		0.41839	0.43884	0.45554	0.51398	0.61396	0.69926	0.74984	0.75377	0.79964	0.86664	0.97969	1.0869	1.13703	1.16581	1.42724	1.4696	1.64099	1.67019	1.68847	1.74295	1.97785	2.10768	2.19218	2.26849	2.26098	2.28943	2.36515	2.59795	2.67668	2.78314	2.98849	NA
Maldives		0.00021	0.00021	0.00021	0.00021	0.00083	0.0009	0.00114	0.00114	0.00123	0.00123	0.00136	0.00136	0.00141	0.00171	0.00342	0.00483	0.0049	0.00433	0.00468	0.00468	0.00663	0.00713	0.01307	0.0147	0.01027	0.00823	0.01136	0.01279	0.01313	0.01459	0.01459	NA
Mongolia		0.08316	0.07573	0.09037	0.09304	0.0942	0.10401	0.11106	0.11697	0.1212	0.11563	0.10901	0.12917	0.11171	0.10046	0.0948	0.10003	0.07572	0.06211	0.06221	0.06154	0.06313	0.06517	0.06955	0.06646	0.07102	0.07177	0.08214	0.08515	0.09026	0.09005	0.09273	NA
Nauru		0.0019	0.00192	0.00192	0.00192	0.00198	0.00197	0.00197	0.00197	0.00196	0.00197	0.00205	0.00205	0.00209	0.00209	0.0021	0.00214	0.00213	0.00214	0.00214	0.00214	0.00213	0.00214	0.00223	0.00223	0.00226	0.00231	0.00226	0.0023	0.00231	0.00237	0.00237	NA
Nepal		0.00827	0.0076	0.00974	0.01093	0.01271	0.01102	0.01392	0.0165	0.01656	0.01667	0.01795	0.02188	0.02353	0.02274	0.02706	0.03035	0.03421	0.03694	0.04958	0.05684	0.05805	0.06212	0.0586	0.06154	0.0631	0.06936	0.06769	0.06982	0.07047	0.07898	0.08436	NA
New Caledonia		0.02755	0.02651	0.02087	0.01782	0.02156	0.02264	0.02233	0.02183	0.02386	0.02615	0.02489	0.02548	0.02623	0.02572	0.02599	0.02644	0.02728	0.02536	0.026	0.02653	0.02974	0.0292	0.03227	0.03324	0.03547	0.03513	0.04069	0.0412	0.04466	0.04242	0.04287	NA
New Zealand		0.49761	0.49292	0.50297	0.52849	0.56337	0.57527	0.62357	0.62883	0.67438	0.67436	0.70599	0.71003	0.70209	0.72462	0.771	0.77638	0.7685	0.78521	0.77319	0.81135	0.82614	0.83579	0.85376	0.84516	0.87666	0.84479	0.86117	0.86163	0.85232	0.84236	0.85742	0.86438
Niue		4e-05	4e-05	4e-05	4e-05	4e-05	4e-05	4e-05	4e-05	4e-05	4e-05	4e-05	4e-05	4e-05	4e-05	4e-05	4e-05	4e-05	4e-05	4e-05	4e-05	4e-05	4e-05	4e-05	4e-05	4e-05	6e-05	7e-05	7e-05	5e-05	5e-05	5e-05	NA
Pakistan		0.63141	0.68508	0.78194	0.79211	0.81937	0.87242	0.93272	1.00649	1.07839	1.13443	1.17658	1.24869	1.30998	1.35773	1.5331	1.58131	1.66887	1.69189	1.71871	1.80415	1.84612	1.79929	1.81339	1.91194	1.96634	2.13909	2.38416	2.48149	2.47811	2.50371	2.55969	NA
Papua New Guinea		0.02903	0.02892	0.02886	0.02972	0.0335	0.03514	0.03586	0.03907	0.0368	0.03777	0.03829	0.03802	0.03996	0.04005	0.03886	0.04525	0.04704	0.04448	0.04474	0.04526	0.04557	0.04578	0.06074	0.06931	0.06853	0.06962	0.07245	0.07309	0.08396	0.05778	0.05858	NA
Philippines		0.55327	0.53651	0.54076	0.52365	0.5028	0.48589	0.49218	0.55121	0.59046	0.65935	0.67806	0.67665	0.71794	0.7397	0.8428	0.90459	0.96042	1.01646	1.04219	1.1119	1.13956	1.12599	1.14734	1.18464	1.21389	1.2158	1.20589	1.17952	1.20299	1.14336	1.21734	NA
Samoa		0.00145	0.00154	0.00171	0.00171	0.00222	0.00181	0.00184	0.00182	0.00182	0.00193	0.00202	0.00202	0.00211	0.00211	0.00202	0.00217	0.0022	0.00224	0.00229	0.00234	0.00234	0.00248	0.0027	0.00263	0.00265	0.00279	0.00275	0.00281	0.00282	0.00286	0.00287	NA
Singapore		0.44171	0.46278	0.49037	0.48736	0.51378	0.49804	0.57213	0.63386	0.67652	0.7329	0.80437	0.85962	0.97456	0.96674	1.17263	1.19025	1.35675	1.45578	1.50448	1.49027	1.52664	1.62081	1.60212	1.69219	1.90294	2.03676	2.08333	2.26036	2.53059	2.89374	3.37195	NA
Solomon Islands		0.00147	0.00208	0.00189	0.00209	0.0021	0.00183	0.00184	0.00212	0.00233	0.00242	0.00247	0.00247	0.00242	0.00223	0.00234	0.00242	0.00242	0.00242	0.00242	0.00242	0.0025	0.00251	0.0026	0.0026	0.00267	0.00294	0.00273	0.00303	0.00294	0.00273	0.003	NA
Sri Lanka		0.0883	0.08934	0.09251	0.09056	0.10712	0.09586	0.09848	0.10326	0.09914	0.09549	0.10563	0.10529	0.10714	0.11889	0.13631	0.14655	0.14603	0.16136	0.16774	0.17986	0.18938	0.18644	0.18871	0.20061	0.19925	0.2195	0.21647	0.22235	0.22215	0.22402	0.22781	NA
Taiwan		1.11685	1.07033	1.0703	1.22045	1.41214	1.45643	1.55603	1.66344	1.79761	1.91653	2.02747	2.08166	2.19362	2.12023	2.57914	2.83434	3.03307	3.1756	3.3658	3.5464	3.80833	3.85665	4.09014	4.2601	4.39973	4.435	4.56696	4.61181	4.56075	4.49634	4.82987	NA
Thailand		0.50786	0.54449	0.53202	0.56767	0.6305	0.70186	0.7224	0.79284	0.90767	1.07364	1.25451	1.37084	1.46711	1.5766	1.86981	2.11672	2.44968	2.59492	2.43736	2.50252	2.57173	2.69236	2.93221	3.20772	3.44176	3.65174	3.70545	3.83697	3.95005	4.05101	4.32479	NA
Timor-Leste (East Timor)		--	--	--	--	--	--	--	--	--	--	--	--	--	--	--	--	--	--	--	--	--	--	--	0.0023	0.0025	0.00249	0.00254	0.00462	0.00479	0.00262	0.00262	NA
Tonga		0.00043	0.00064	0.00059	0.00064	0.00064	0.00066	0.00066	0.00097	0.00115	0.00125	0.00125	0.00142	0.00141	0.00141	0.00165	0.00165	0.00183	0.00188	0.00183	0.00183	0.00187	0.00178	0.00159	0.00159	0.00171	0.00208	0.00246	0.00252	0.00253	0.00252	0.00252	NA
U.S. Pacific Islands		0.00219	0.00218	0.00218	0.00218	0.00206	0.00202	0.00217	0.00217	0.00286	0.00425	0.00438	0.00438	0.00441	0.00423	0.00434	0.00447	0.00454	0.00446	0.00446	0.00441	0.0044	0.00442	0.00434	0.00434	0.00431	0.00432	0.00442	0.0045	0.00507	0.00441	0.00513	NA
Vanuatu		0.00172	0.0015	0.00151	0.00147	0.00154	0.00167	0.00167	0.0016	0.00189	0.00168	0.00177	0.00139	0.00092	0.00087	0.00092	0.00092	0.00092	0.00092	0.00092	0.00092	0.00118	0.00118	0.00127	0.00127	0.00131	0.0014	0.00136	0.00158	0.00143	0.00175	0.00175	NA
Vietnam		0.17136	0.16951	0.18354	0.18621	0.19248	0.21448	0.1915	0.22003	0.20047	0.24265	0.26463	0.28084	0.29175	0.33307	0.367	0.47714	0.56711	0.58366	0.61132	0.68331	0.73608	0.81314	0.90187	0.97817	1.06511	1.17323	1.30862	1.4182	1.63544	1.67657	1.86492	NA
Wake Island		0.01857	0.01852	0.01852	0.01852	0.01874	0.01838	0.01843	0.01843	0.01824	0.01829	0.01784	0.01784	0.01806	0.01625	0.01823	0.01841	0.01845	0.01861	0.01861	0.01861	0.0187	0.01875	0.01907	0.01907	0.01896	0.01888	0.01937	0.01986	0.01888	0.01932	0.01916	NA
World		283.151	280.929	280.522	284.34	299.689	307.056	314.72	324.535	337.038	342.814	346.023	347.212	347.194	342.173	355.164	362.95	372.102	379.211	382.055	389.158	400.072	402.271	412.211	425.874	444.694	459.292	470.148	482.865	490.69	487.58	510.551	NA
