# Supplementary material
Source: MDPI journal article supplement (https://www.mdpi.com/1099-4300/15/12/5565)
Supplement: s2 [file s2 › Sources/Raw Data/Total_Primary_Energy_Production_(Quadrillion_Btu).xls]

## Sheet: Data3
Table: Total Primary Energy Production (Quadrillion Btu)
		1980	1981	1982	1983	1984	1985	1986	1987	1988	1989	1990	1991	1992	1993	1994	1995	1996	1997	1998	1999	2000	2001	2002	2003	2004	2005	2006	2007	2008	2009	2010	2011
Bermuda		0	0	0	0	0	0	0	0	0	0	0	0	0	0	0	0	0	0	0	0	0	0	0	0	0	0	0	0	0	0	0	NA
Canada		10.2757	10.094	10.0975	10.3579	11.3399	12.02	11.925	12.5671	13.4119	13.3274	13.4062	13.9595	14.4636	15.3795	16.341	16.8331	17.2262	17.4787	17.4377	17.6813	18.1283	18.0215	18.3578	18.3074	18.6642	18.8932	19.2273	19.5439	19.0196	18.3249	18.3558	18.844
Greenland		0	0	0	0	0	0	0	0	0	0	0	0	0	0	0	0	0	0	0	0	0	0	0	0	0	0	0	0	0	0	0	NA
Mexico		5.72474	6.75331	7.8072	7.67598	7.9055	7.84801	7.12104	7.38652	7.38719	7.41127	7.65919	7.97524	7.97549	8.07602	8.15155	8.08957	8.78602	9.09402	9.34467	9.09376	9.37574	9.58779	9.64878	10.0971	10.0056	10.0279	10.3075	9.75793	9.17026	8.61485	8.77764	8.80036
Saint Pierre and Miquelon		0	0	0	0	0	0	0	0	0	0	0	0	0	0	0	0	0	0	0	0	0	0	0	0	0	0	0	0	0	0	0	NA
United States		67.1758	66.9518	66.569	64.1147	68.8396	67.6974	67.0666	67.5434	68.92	69.3209	70.7051	70.3624	69.9557	68.3147	70.7257	71.1744	72.486	72.4715	72.8764	71.742	71.3322	71.7343	70.7132	69.9626	70.2224	69.4437	70.7539	71.4	73.2178	72.6409	74.7951	77.9581
Antarctica		0	0	0	0	0	0	0	0	0	0	0	0	0	0	0	0	0	0	0	0	0	0	0	0	0	2e-05	2e-05	2e-05	2e-05	4e-05	4e-05	NA
Antigua and Barbuda		0	0	0	0	0	0	0	0	0	0	0	0	0	0	0	0	0	0	0	0	0	0	0	0	0	0	0	0	0	0	0	NA
Argentina		1.59757	1.6708	1.7293	1.78501	1.85245	1.83444	1.84348	1.83397	1.90555	1.98481	2.01466	2.10401	2.28036	2.47743	2.68689	2.91098	3.02718	3.28326	3.37629	3.40713	3.49153	3.65955	3.57399	3.74536	3.755	3.74632	3.8218	3.66273	3.64405	3.55311	3.42873	NA
Aruba		--	--	--	--	--	--	0	0	0	0	0	0	0	0	0	0	0	0	0	0	0	0	0	0	0	0	0	0	0	0.00029	0.00098	NA
Bahamas, The		0	0	0	0	0	0	0	0	0	0	0	0	0	0	0	0	0	0	0	0	0	0	0	0	0	0	0	0	0	0	0	NA
Barbados		0.00037	0.00037	0.00251	0.00256	0.00472	0.0047	0.0047	0.00322	0.00374	0.0034	0.00371	0.0034	0.00371	0.00383	0.00345	0.00375	0.00322	0.003	0.00451	0.00523	0.00436	0.0038	0.00322	0.00322	0.00323	0.00322	0.00329	0.00341	0.00355	0.00238	0.00288	NA
Belize		0.00042	0.00042	0.00042	0.00042	0.00042	0.00042	0.00042	0.00042	0.00041	0.00042	0.00042	0.00042	0.00041	0.00041	0.00041	0.00082	0.00103	0.0011	0.00107	0.00118	0.00136	0.00136	0.00131	0.00104	0.00104	0.00109	0.00688	0.00842	0.00977	0.01262	0.01393	NA
Bolivia		0.14792	0.13575	0.15157	0.1507	0.15659	0.15109	0.14833	0.14822	0.15788	0.16899	0.17032	0.16895	0.17833	0.17348	0.17638	0.19746	0.20112	0.20525	0.21099	0.18601	0.21619	0.27679	0.32105	0.3631	0.50477	0.59087	0.62026	0.65635	0.65736	0.57174	0.63945	NA
Brazil		1.90238	1.99755	2.21678	2.53638	3.04125	3.37817	3.40767	3.44631	3.53616	3.7218	3.75862	3.91162	3.96296	4.09494	4.26429	4.4674	4.83357	5.06074	5.47494	5.87916	6.36028	6.15465	6.70199	7.05625	7.1452	7.67172	8.01022	8.31825	8.56489	8.92527	9.4673	9.9257
Cayman Islands		0	0	0	0	0	0	0	0	0	0	0	0	0	0	0	0	0	0	0	0	0	0	0	0	0	0	0	0	0	0	0	NA
Chile		0.28095	0.29549	0.2704	0.26663	0.27733	0.28542	0.2684	0.27513	0.27485	0.27416	0.31879	0.3115	0.33835	0.34006	0.33706	0.35828	0.3419	0.344	0.29826	0.22932	0.28219	0.31875	0.31778	0.34394	0.30488	0.38924	0.40649	0.33708	0.36245	0.39076	0.34388	0.33551
Colombia		0.66083	0.67285	0.74996	0.78786	0.93196	1.0209	1.38934	1.55572	1.61884	1.78465	1.93152	1.87488	1.89984	1.99168	2.01266	2.37845	2.61502	2.84233	3.05122	3.20289	3.0757	3.0826	2.89052	3.11979	3.2301	3.3786	3.61104	3.75504	4.04401	4.19508	4.50611	NA
Costa Rica		0.02179	0.02363	0.02469	0.02951	0.0311	0.02872	0.02994	0.03099	0.03118	0.03429	0.03483	0.03787	0.04157	0.04524	0.04513	0.04128	0.04458	0.05511	0.05	0.06128	0.0693	0.0701	0.0743	0.0731	0.07918	0.07901	0.08019	0.08155	0.08594	0.08576	0.08654	NA
Cuba		0.02426	0.03061	0.03616	0.04105	0.04798	0.05409	0.05749	0.05792	0.05216	0.05269	0.05388	0.05135	0.05771	0.05996	0.07063	0.07323	0.08548	0.11291	0.10118	0.12039	0.13025	0.13816	0.13394	0.1511	0.15802	0.14165	0.14026	0.14544	0.17215	0.16233	0.16891	NA
Dominica		9e-05	0.0001	9e-05	0.00016	0.00017	0.00015	0.00014	0.00015	0.00017	0.00017	0.00017	0.00017	0.00017	0.00016	0.00018	0.0002	0.0002	0.0002	0.00028	0.00033	0.00033	0.00028	0.00031	0.0003	0.00034	0.00027	0.00027	0.00021	0.0002	0.0002	0.0003	NA
Dominican Republic		0.00671	0.00923	0.00869	0.00908	0.00667	0.01122	0.00982	0.01031	0.00898	0.0065	0.00434	0.00603	0.00574	0.01189	0.00591	0.00659	0.00924	0.00721	0.00773	0.0115	0.00808	0.00758	0.00926	0.01268	0.01674	0.01913	0.01765	0.01719	0.01392	0.01458	0.01424	NA
Ecuador		0.46306	0.47481	0.476	0.54282	0.60657	0.66153	0.69176	0.43247	0.71737	0.66711	0.68234	0.71301	0.76344	0.82095	0.87375	0.91937	0.94378	0.92356	0.89684	0.89752	0.95361	0.98458	0.94188	0.98126	1.24176	1.24597	1.26308	1.2298	1.23549	1.17019	1.16721	NA
El Salvador		0.01603	0.01611	0.01737	0.01555	0.01787	0.01666	0.01684	0.01628	0.01784	0.01948	0.01941	0.01334	0.01441	0.01599	0.01652	0.01964	0.02393	0.01963	0.02064	0.02424	0.02009	0.02208	0.0218	0.02579	0.02451	0.02792	0.03199	0.03211	0.03657	0.03168	0.03777	NA
Falkland Islands (Islas Malvinas)		0	0	0	0	0	0	0	0	0	0	0	0	0	0	0	0	0	0	0	0	0	0	0	0	0	0	0	0	2e-05	2e-05	2e-05	NA
French Guiana		0	0	0	0	0	0	0	0	0	0	0	0	0	0	0	0	0	0	0	0	0	0.00548	0.00558	0.00585	0.00594	0.00616	0.00634	0.00655	0.00689	0.00701	0.00722	NA
Grenada		0	0	0	0	0	0	0	0	0	0	0	0	0	0	0	0	0	0	0	0	0	0	0	0	0	0	0	0	0	0	0	NA
Guadeloupe		0	0	0	0	0	0	0.00031	0.00031	0.00031	0.00031	0.00031	0.00031	0.00031	0.00032	0.00032	0.00032	0.00032	0.00036	0.00041	0.00041	0.00051	0.00052	0.00061	0.00154	0.0015	0.0015	0.00149	0.00148	0.00148	0.00146	0.00146	NA
Guatemala		0.01677	0.01497	0.01867	0.02417	0.01774	0.01413	0.02921	0.02689	0.02621	0.03117	0.03376	0.03518	0.03263	0.03861	0.04286	0.0446	0.05166	0.05785	0.07425	0.08185	0.0785	0.07639	0.06705	0.0832	0.09011	0.08892	0.0919	0.08282	0.08477	0.08007	0.08564	NA
Guyana		5e-05	5e-05	5e-05	5e-05	5e-05	5e-05	5e-05	5e-05	5e-05	5e-05	5e-05	5e-05	5e-05	5e-05	5e-05	5e-05	5e-05	5e-05	6e-05	6e-05	0	0	0	0	0	0	0	0	0	0	0	NA
Haiti		0.00238	0.00245	0.0027	0.00282	0.0029	0.00321	0.00349	0.00346	0.00343	0.00346	0.00383	0.0036	0.00329	0.00279	0.00238	0.00258	0.00278	0.00202	0.00309	0.00271	0.00286	0.00289	0.00261	0.00258	0.00258	0.00262	0.00266	0.0015	0.00176	0.002	0.00171	NA
Honduras		0.00802	0.00858	0.00884	0.00874	0.00903	0.00905	0.01329	0.01178	0.01795	0.01904	0.02149	0.02189	0.02244	0.0231	0.01857	0.01708	0.02088	0.02108	0.01942	0.02158	0.02283	0.01957	0.01638	0.01802	0.01464	0.0186	0.02173	0.0231	0.02429	0.0284	0.03	NA
Jamaica		0.00179	0.00179	0.00195	0.00215	0.0014	0.0013	0.0017	0.00194	0.0019	0.00223	0.00215	0.00173	0.00207	0.00222	0.00249	0.00225	0.00236	0.00244	0.00219	0.00222	0.00221	0.00149	0.00126	0.00151	0.00201	0.00236	0.00254	0.00244	0.0023	0.0023	0.0026	NA
Martinique		0	0	0	0	0	0	0	0	0	0	0	0	0	0	0	0	0	0	0	0	0	0	0	0	0	2e-05	2e-05	2e-05	2e-05	2e-05	2e-05	NA
Montserrat		0	0	0	0	0	0	0	0	0	0	0	0	0	0	0	0	0	0	0	0	0	0	0	0	0	0	0	0	0	0	0	NA
Netherlands Antilles		0	0	0	0	0	0	0	0	0	0	0	0	0	1e-05	7e-05	7e-05	7e-05	7e-05	7e-05	7e-05	0.00031	0.00031	0.00031	0.00031	0.0003	0.0003	0.0003	0.0003	0.0003	0.00059	0.00059	NA
Nicaragua		0.00561	0.00547	0.00476	0.00367	0.00556	0.00586	0.00486	0.00623	0.0061	0.00979	0.00817	0.00827	0.00747	0.00911	0.00762	0.00735	0.00742	0.00639	0.00459	0.00536	0.00383	0.00449	0.00616	0.00712	0.00705	0.009	0.00799	0.00777	0.01036	0.00889	0.01152	NA
Panama		0.01034	0.0153	0.0128	0.0105	0.01691	0.02096	0.02276	0.02195	0.0238	0.02322	0.02337	0.02146	0.01984	0.02386	0.02471	0.02484	0.03093	0.02957	0.02184	0.03194	0.03477	0.0258	0.03444	0.02884	0.03773	0.0371	0.03587	0.03662	0.03955	0.03832	0.04122	NA
Paraguay		0.00745	0.00788	0.00706	0.00832	0.00943	0.04247	0.12439	0.19274	0.20544	0.25276	0.28298	0.30648	0.28086	0.32089	0.37187	0.43003	0.46383	0.51415	0.51354	0.52607	0.54021	0.46358	0.48556	0.52488	0.51525	0.50649	0.52815	0.52571	0.54107	0.53103	0.52218	NA
Peru		0.53914	0.55663	0.56237	0.50417	0.53734	0.55963	0.54358	0.51177	0.4549	0.4267	0.40517	0.38458	0.36982	0.42523	0.43894	0.44176	0.42727	0.39696	0.4024	0.38994	0.38713	0.39937	0.40313	0.40186	0.40712	0.47211	0.50517	0.53865	0.5879	0.62269	0.80832	NA
Puerto Rico		0.00212	0.0013	0.00109	0.00116	0.00141	0.00191	0.00233	0.00268	0.00281	0.00284	0.00142	0.00124	0.0014	0.00124	0.0007	0.0009	0.0014	0.00104	0.00105	0.00162	0.00155	0.00137	0.00116	0.00105	0.00141	0.00138	0.00141	0.00162	0.00154	0.0017	0.00149	NA
Saint Kitts and Nevis		0	0	0	0	0	0	0	0	0	0	0	0	0	0	0	0	0	0	0	0	0	0	0	0	0	0	0	0	0	0	0	NA
Saint Lucia		0	0	0	0	0	0	0	0	0	0	0	0	0	0	0	0	0	0	0	0	0	0	0	0	0	0	0	0	0	0	0	NA
Saint Vincent/Grenadines		0.00018	0.00018	0.00019	0.00019	0.00023	0.00027	0.00029	0.00032	0.00036	0.00038	0.00025	0.00014	0.00021	0.00024	0.00022	0.00022	0.00022	0.00021	0.00022	0.00022	0.00026	0.0002	0.00022	0.00022	0.00027	0.00026	0.00023	0.00022	0.00023	0.00022	0.00025	NA
Suriname		0.00917	0.00862	0.01099	0.00751	0.00883	0.01236	0.01251	0.00798	0.01195	0.02057	0.02118	0.02261	0.02643	0.02648	0.02893	0.02934	0.03059	0.0247	0.02934	0.03648	0.03038	0.03056	0.03061	0.03077	0.03079	0.03128	0.03531	0.03975	0.04515	0.04534	0.04535	NA
Trinidad and Tobago		0.55003	0.61244	0.50248	0.48461	0.57552	0.61061	0.52843	0.4952	0.50726	0.50858	0.51505	0.54702	0.51431	0.53455	0.56088	0.58101	0.61576	0.6283	0.62523	0.7314	0.81517	0.8427	0.9435	1.25259	1.35401	1.47733	1.71229	1.75802	1.76304	1.80613	1.85795	NA
Turks and Caicos Islands		0	0	0	0	0	0	0	0	0	0	0	0	0	0	0	0	0	0	0	0	0	0	0	0	0	0	0	0	0	0	0	NA
Uruguay		0.02336	0.02634	0.02531	0.07485	0.07342	0.06669	0.07539	0.07487	0.05538	0.04028	0.07278	0.06374	0.08178	0.07509	0.07685	0.06022	0.05947	0.06589	0.09284	0.05616	0.07157	0.09445	0.09645	0.08688	0.04779	0.06656	0.03581	0.08031	0.05224	0.05897	0.09299	NA
Venezuela		5.76591	5.66743	5.25069	5.03204	5.05581	4.8169	5.21455	5.16944	5.58386	5.76615	6.30585	6.96108	6.9551	7.26089	7.69874	8.07865	8.61848	9.4829	9.44805	8.53973	9.37129	9.22927	8.15865	7.32645	8.06229	8.02834	8.08533	7.64915	7.59524	7.05004	7.00349	7.27603
Virgin Islands, U.S.		0	0	0	0	0	0	0	0	0	0	0	0	0	0	0	0	0	0	0	0	0	0	0	0	0	0	0	0	0	0	0	NA
Virgin Islands, British		0	0	0	0	0	0	0	0	0	0	0	0	0	0	0	0	0	0	0	0	0	0	0	0	0	0	0	0	0	0	0	NA
Albania		0.15556	0.15826	0.20594	0.23428	0.19082	0.19173	0.1966	0.20228	0.18613	0.19463	0.12711	0.09511	0.06442	0.06284	0.06766	0.06778	0.0827	0.07317	0.06576	0.06754	0.06085	0.05137	0.05187	0.06976	0.07157	0.07103	0.06866	0.04305	0.05283	0.06405	0.09844	NA
Austria		0.47051	0.46393	0.46539	0.45463	0.43889	0.45569	0.45495	0.39712	0.49775	0.4985	0.46314	0.46927	0.49498	0.51172	0.49048	0.51853	0.48535	0.49279	0.51301	0.548	0.55978	0.55187	0.55051	0.49011	0.5148	0.50407	0.51381	0.54143	0.54093	0.56751	0.54973	0.51804
Belgium		0.28175	0.39753	0.42596	0.47825	0.52898	0.59126	0.60838	0.58124	0.51676	0.49986	0.47835	0.4732	0.46352	0.44328	0.4257	0.4332	0.4496	0.48784	0.47608	0.50818	0.50312	0.48353	0.49155	0.48952	0.4943	0.4987	0.49754	0.51909	0.50221	0.53037	0.54758	0.57203
Bosnia and Herzegovina		--	--	--	--	--	--	--	--	--	--	--	--	0.16728	0.13819	0.0476	0.08254	0.07641	0.12359	0.14306	0.15115	0.17616	0.17774	0.1897	0.19282	0.20527	0.20778	0.2197	0.19808	0.23048	0.24696	0.253	NA
Bulgaria		0.33975	0.36186	0.39343	0.4149	0.42863	0.40701	0.42949	0.44638	0.45712	0.4551	0.41266	0.3523	0.33124	0.34806	0.35646	0.39967	0.43258	0.41631	0.41817	0.37248	0.40542	0.40542	0.42746	0.39759	0.38828	0.40611	0.42059	0.38788	0.39827	0.38552	0.42187	NA
Croatia		--	--	--	--	--	--	--	--	--	--	--	--	0.20176	0.21109	0.21515	0.20963	0.21586	0.1879	0.19221	0.18817	0.18173	0.18978	0.1652	0.17121	0.17905	0.16573	0.15939	0.15491	0.16152	0.17783	0.18895	NA
Cyprus		0	0	0	0	0	0	0	0	0	0	0	0	0	0	0	0	0	0	0	0	0	0	0	0	0	1e-05	1e-05	3e-05	0.00014	0.0001	0.00118	NA
Czech Republic		--	--	--	--	--	--	--	--	--	--	--	--	--	1.20062	1.11561	1.0606	1.11301	0.89473	0.84072	0.76037	0.81381	0.83901	0.86848	0.9154	0.90973	0.89783	0.92133	1.0685	1.05125	1.00594	1.02311	1.03142
Denmark		0.01278	0.0314	0.07281	0.09551	0.10792	0.16822	0.23852	0.30512	0.31139	0.36698	0.38207	0.46097	0.51351	0.55643	0.59513	0.61495	0.70895	0.8169	0.83987	0.98184	1.1449	1.11831	1.17875	1.18428	1.28484	1.30134	1.21929	1.11977	1.1007	0.97579	0.96039	0.88001
Faroe Islands		0.00051	0.00051	0.00051	0.00052	0.00051	0.00051	0.00051	0.00051	0.00064	0.00074	0.00077	0.00077	0.00086	0.00076	0.00078	0.00078	0.00073	0.00077	0.00079	0.00072	0.00077	0.00078	0.00098	0.0009	0.00101	0.00108	0.00114	0.00118	0.00106	0.00104	0.00078	NA
Finland		0.17443	0.2847	0.2995	0.31471	0.32141	0.31393	0.31468	0.33441	0.32778	0.32125	0.35467	0.37903	0.39396	0.39359	0.37684	0.38657	0.37393	0.40186	0.46293	0.44161	0.45564	0.44327	0.418	0.41639	0.47752	0.4606	0.44504	0.4677	0.49623	0.44073	0.45782	0.45342
Former Czechoslovakia		1.66636	1.64526	1.67563	1.72966	1.77445	1.80665	1.87446	1.91643	1.90232	1.84288	1.6751	1.55915	1.48033	--	--	--	--	--	--	--	--	--	--	--	--	--	--	--	--	--	--	--
Former Serbia and Montenegro		--	--	--	--	--	--	--	--	--	--	--	--	0.53634	0.51561	0.49311	0.44361	0.59975	0.58052	0.59725	0.49505	0.53768	0.54541	0.5528	0.54196	0.55085	0.5206	--	--	--	--	--	--
Former Yugoslavia		1.04746	1.14904	1.1843	1.22998	1.35369	1.42134	1.46354	1.44013	1.45955	1.44267	1.3885	1.29072	--	--	--	--	--	--	--	--	--	--	--	--	--	--	--	--	--	--	--	--
France		2.33296	2.66161	2.62741	2.96622	3.3718	3.5489	3.80346	3.95824	4.04951	4.03841	4.24685	4.44925	4.6134	4.83851	4.86432	4.94188	5.0287	4.92414	4.77703	4.92164	5.02484	5.14588	5.13049	5.15313	5.1695	5.10224	5.14042	5.06872	5.13225	4.79201	5.06788	5.07701
Germany		--	--	--	--	--	--	--	--	--	--	--	6.3591	6.17629	5.84931	5.71644	5.66677	5.49839	5.5714	5.26857	5.31983	5.32689	5.29479	5.3131	5.30126	5.3846	5.26697	5.27371	5.20216	5.03071	4.74467	4.7991	4.67075
Germany, East		2.423	2.50096	2.55479	2.60895	2.77718	2.92252	2.88311	2.85581	2.87731	2.78734	2.48737	--	--	--	--	--	--	--	--	--	--	--	--	--	--	--	--	--	--	--	--	--
Germany, West		4.77949	4.919	4.93276	4.81234	5.02623	5.3512	5.16001	5.1942	5.24192	5.12603	5.05376	--	--	--	--	--	--	--	--	--	--	--	--	--	--	--	--	--	--	--	--	--
Gibraltar		0	0	0	0	0	0	0	0	0	0	0	0	0	0	0	0	0	0	0	0	0	0	0	0	0	0	0	0	0	0	0	NA
Greece		0.17449	0.21675	0.25165	0.26604	0.28754	0.30472	0.32362	0.35638	0.36877	0.37665	0.37067	0.39023	0.33158	0.35184	0.34717	0.35758	0.35231	0.38478	0.39526	0.38672	0.39963	0.39456	0.40484	0.41609	0.4174	0.41723	0.40406	0.37976	0.38709	0.40622	0.39041	0.37555
Hungary		0.59967	0.59552	0.625	0.63092	0.65526	0.68746	0.67844	0.70189	0.69452	0.66335	0.60705	0.56841	0.5575	0.52719	0.52941	0.52204	0.5147	0.5267	0.47918	0.45884	0.45343	0.44885	0.41802	0.39141	0.39692	0.40015	0.39574	0.38472	0.38848	0.40745	0.40498	NA
Iceland		0.03223	0.03363	0.03737	0.03966	0.04094	0.0402	0.04239	0.04326	0.04557	0.04667	0.04641	0.04639	0.04651	0.04822	0.04879	0.05079	0.05242	0.05648	0.06343	0.07284	0.07768	0.08228	0.08484	0.08626	0.08567	0.0861	0.09773	0.11753	0.16103	0.16308	0.16518	NA
Ireland		0.04282	0.0604	0.08291	0.08823	0.09175	0.09784	0.07078	0.0678	0.08177	0.08956	0.0906	0.09257	0.09219	0.10319	0.10644	0.10681	0.10346	0.0922	0.07385	0.06004	0.05552	0.04045	0.04353	0.03629	0.04429	0.03905	0.04258	0.04383	0.05086	0.05405	0.05024	0.06542
Italy		1.08469	1.11703	1.16611	1.11838	1.16586	1.16672	1.25363	1.19188	1.26337	1.18802	1.18699	1.28485	1.31793	1.34769	1.42142	1.35838	1.42766	1.41925	1.40315	1.34437	1.32441	1.29522	1.22013	1.18062	1.25546	1.19173	1.16001	1.08257	1.14737	1.1659	1.28897	1.36743
Luxembourg		0.00119	0.00134	0.00122	0.00121	0.00128	0.00109	0.00121	0.00149	0.00146	0.00113	0.00108	0.00126	0.00104	0.00109	0.00163	0.00144	0.00104	0.00134	0.00173	0.00159	0.00206	0.00208	0.00187	0.00172	0.00229	0.00239	0.00278	0.003	0.00317	0.003	0.00304	0.00293
Macedonia		--	--	--	--	--	--	--	--	--	--	--	--	0.06949	0.06584	0.06719	0.07159	0.07121	0.07484	0.08315	0.0792	0.06223	0.06078	0.06131	0.06621	0.06602	0.06351	0.06323	0.05599	0.06224	0.06487	0.07109	NA
Malta		0	0	0	0	0	0	0	0	0	0	0	0	0	0	0	0	0	0	0	0	0	0	0	0	0	0	0	0	0	1e-05	2e-05	NA
Montenegro		--	--	--	--	--	--	--	--	--	--	--	--	--	--	--	--	--	--	--	--	--	--	--	--	--	--	0.03057	0.02321	0.03042	0.02848	0.04397	NA
Netherlands		3.15555	2.93671	2.53892	2.72447	2.76318	2.92124	2.7408	2.73001	2.4225	2.60429	2.63501	2.95075	2.92717	2.97687	2.91287	2.90712	3.24814	2.88062	2.76941	2.55531	2.47272	2.62971	2.61547	2.52719	2.94062	2.7042	2.65197	2.646	2.88505	2.72398	3.02291	2.79104
Norway		2.92913	3.02015	3.01558	3.43669	3.67444	3.77109	3.91	4.33576	4.68478	5.58781	5.80362	6.17502	6.86308	7.12045	7.77376	8.34888	9.26151	9.58339	9.33133	9.53233	10.2997	10.3006	10.6899	10.6435	10.7927	10.6566	10.1234	9.91874	10.1259	9.87777	9.44588	9.01538
Poland		4.78572	4.08336	4.65675	4.72645	4.80354	4.86512	4.9189	4.97737	4.97228	4.60421	3.86027	3.7221	3.65886	3.6713	3.72343	3.58836	3.82824	3.83374	3.35664	3.50316	3.05651	3.07383	3.07707	3.05648	3.0363	2.96598	2.89804	2.72128	2.65802	2.51188	2.50051	2.56514
Portugal		0.08783	0.05765	0.0777	0.09014	0.10718	0.11913	0.09723	0.10414	0.13441	0.07043	0.10539	0.10565	0.05983	0.0993	0.12103	0.09597	0.16176	0.14401	0.14299	0.08851	0.13274	0.16384	0.10088	0.18254	0.1251	0.08517	0.15789	0.16213	0.14643	0.18063	0.27824	0.23632
Romania		2.2898	2.35684	2.47625	2.57569	2.51444	2.41449	2.48679	2.48799	2.47888	2.28382	1.87267	1.62151	1.50616	1.45788	1.42327	1.44876	1.43002	1.40253	1.25241	1.20713	1.19067	1.25059	1.20088	1.13888	1.14455	1.15166	1.17748	1.16289	1.19168	1.13885	1.14168	NA
Serbia		--	--	--	--	--	--	--	--	--	--	--	--	--	--	--	--	--	--	--	--	--	--	--	--	--	--	0.51474	0.50476	0.51997	0.53731	0.56004	NA
Slovakia		--	--	--	--	--	--	--	--	--	--	--	--	--	0.23196	0.2422	0.23676	0.23512	0.22558	0.23146	0.24543	0.28355	0.29535	0.30525	0.28407	0.27451	0.28198	0.2847	0.2515	0.26603	0.24031	0.25379	0.23687
Slovenia		--	--	--	--	--	--	--	--	--	--	--	--	0.13456	0.12521	0.12975	0.13854	0.13855	0.13672	0.13838	0.13866	0.13907	0.14005	0.14484	0.13955	0.15139	0.14602	0.14345	0.14025	0.1546	0.15413	0.15245	0.1486
Spain		0.86618	0.91924	1.02635	1.13214	1.28212	1.3315	1.36727	1.35649	1.48623	1.43904	1.42504	1.43464	1.34103	1.33401	1.32682	1.18776	1.34779	1.27961	1.30495	1.2568	1.33594	1.51374	1.33535	1.51364	1.46138	1.28833	1.39109	1.38327	1.39127	1.42555	1.722	1.53783
Sweden		0.87311	0.98832	0.95362	1.07081	1.20975	1.30937	1.31774	1.40352	1.39002	1.39142	1.41575	1.41002	1.3929	1.37407	1.3293	1.39111	1.26501	1.39885	1.49598	1.45974	1.39141	1.54579	1.37188	1.24485	1.4272	1.50711	1.35047	1.40854	1.41629	1.27967	1.36035	1.39081
Switzerland		0.47541	0.51526	0.52227	0.52057	0.49033	0.5489	0.55892	0.58063	0.59973	0.54193	0.55368	0.56842	0.57927	0.60849	0.65386	0.61329	0.55185	0.60642	0.60541	0.67387	0.64805	0.70332	0.6398	0.64097	0.61809	0.55827	0.59904	0.64066	0.64597	0.63927	0.63019	0.59619
Turkey		0.42914	0.46927	0.51297	0.49122	0.54243	0.61885	0.70011	0.77913	0.80585	0.81742	0.85381	0.8705	0.94822	0.98966	0.94924	0.98529	1.04515	1.09851	1.16474	1.05768	1.00392	0.89666	0.9431	0.91919	1.00106	1.06457	1.15442	1.17343	1.19349	1.2319	1.35082	1.4095
United Kingdom		8.65992	8.96749	9.5911	10.0971	8.8077	10.2014	10.6448	10.346	10.0015	9.02875	9.00071	9.3107	9.11058	9.41593	10.2097	10.7828	11.565	11.3326	11.532	11.8913	11.0867	11.1613	10.9995	10.4822	9.40022	8.56018	7.79401	7.3094	6.9551	6.58007	6.17228	5.36866
Armenia		--	--	--	--	--	--	--	--	--	--	--	--	0.03116	0.0438	0.03589	0.01959	0.04071	0.03082	0.03217	0.03654	0.0343	0.0332	0.0412	0.04143	0.04568	0.04692	0.04633	0.04568	0.04498	0.04733	0.05249	NA
Azerbaijan		--	--	--	--	--	--	--	--	--	--	--	--	0.77937	0.71728	0.6616	0.64496	0.65114	0.61945	0.73061	0.84005	0.83656	0.88026	0.87882	0.90504	0.88762	1.18145	1.65684	2.23326	2.51491	2.78701	2.87242	NA
Belarus		--	--	--	--	--	--	--	--	--	--	--	--	0.09672	0.09666	0.09632	0.09377	0.08944	0.08557	0.08657	0.08654	0.08726	0.08704	0.08559	0.08427	0.08513	0.08208	0.08262	0.0822	0.08208	0.07815	0.07494	NA
Estonia		--	--	--	--	--	--	--	--	--	--	--	--	0.17355	0.10059	0.10139	0.09128	0.13553	0.11215	0.10403	0.08923	0.09791	0.09884	0.10363	0.12459	0.1172	0.12269	0.11874	0.13929	0.13624	0.12976	0.15962	0.16763
Former U.S.S.R.		56.4628	56.8563	58.7383	60.2513	63.3287	65.2637	67.74	69.7201	72.2676	71.8952	72.1108	66.4379	--	--	--	--	--	--	--	--	--	--	--	--	--	--	--	--	--	--	--	--
Georgia		--	--	--	--	--	--	--	--	--	--	--	--	0.07624	0.07446	0.07644	0.05586	0.06428	0.06919	0.07146	0.07241	0.06583	0.06323	0.07191	0.07305	0.06518	0.06663	0.05485	0.06946	0.07256	0.07692	0.0949	NA
Kazakhstan		--	--	--	--	--	--	--	--	--	--	--	--	3.64083	3.26044	2.60841	2.32566	2.40957	2.47204	2.4282	2.62636	3.38294	3.68688	3.98398	4.16245	4.65221	4.8642	5.13403	5.28115	5.54924	5.56977	5.82175	NA
Kyrgyzstan		--	--	--	--	--	--	--	--	--	--	--	--	0.13306	0.12112	0.13597	0.12541	0.13669	0.12263	0.11087	0.13319	0.14957	0.1394	0.11938	0.14731	0.15075	0.15162	0.1563	0.14522	0.11543	0.10751	0.11112	NA
Latvia		--	--	--	--	--	--	--	--	--	--	--	--	0.02583	0.02934	0.03375	0.02999	0.01905	0.02986	0.03051	0.02793	0.02851	0.02905	0.02502	0.02371	0.03172	0.03381	0.02737	0.02769	0.03135	0.03436	0.03512	NA
Lithuania		--	--	--	--	--	--	--	--	--	--	--	--	0.15108	0.13805	0.08892	0.12408	0.14492	0.1269	0.15326	0.11404	0.10159	0.13895	0.16583	0.17688	0.17038	0.11869	0.09979	0.11192	0.11258	0.12086	0.01313	NA
Moldova		--	--	--	--	--	--	--	--	--	--	--	--	0.00746	0.00715	0.0049	0.0039	0.00429	0.00456	0.00096	0.00092	0.00058	0.00074	0.00122	0.00065	0.00058	0.00062	0.0026	0.00033	0.0008	0.00053	0.00076	NA
Russia		--	--	--	--	--	--	--	--	--	--	--	--	47.9904	44.6872	42.3032	41.4181	39.9461	38.7414	39.0652	40.8088	41.6954	42.6263	44.1628	47.1823	49.8648	51.0796	52.0558	52.5599	52.546	50.4291	53.2232	56.3963
Tajikistan		--	--	--	--	--	--	--	--	--	--	--	--	0.17322	0.17934	0.17471	0.15243	0.15436	0.14171	0.14642	0.15975	0.14321	0.14832	0.15479	0.16873	0.16582	0.17186	0.16788	0.17213	0.16926	0.15824	0.15868	NA
Turkmenistan		--	--	--	--	--	--	--	--	--	--	--	--	2.34412	2.58223	1.49372	1.36122	1.54939	1.15967	0.74996	1.14739	2.04777	2.13305	2.38175	2.60554	2.61661	2.66389	2.62798	2.83698	2.91382	1.77312	2.03627	NA
Ukraine		--	--	--	--	--	--	--	--	--	--	--	--	4.03475	3.69069	3.22211	3.3142	3.0448	3.02061	3.0417	3.04805	3.04794	3.05833	3.05747	3.19921	3.21008	3.2314	3.29192	3.22316	3.21639	3.0739	3.08873	NA
Uzbekistan		--	--	--	--	--	--	--	--	--	--	--	--	1.78593	1.90014	2.04044	2.14555	2.1533	2.17794	2.3863	2.38508	2.4104	2.65369	2.45486	2.46131	2.54567	2.50468	2.59007	2.66543	2.79091	2.54626	2.5095	NA
Bahrain		0.22023	0.23687	0.24305	0.25079	0.24159	0.27123	0.2954	0.33089	0.29706	0.29963	0.31258	0.33331	0.28675	0.351	0.34785	0.34311	0.33392	0.39892	0.40301	0.40835	0.41491	0.42459	0.44511	0.45209	0.45737	0.47654	0.50043	0.51664	0.5396	0.54188	0.5492	NA
Iran		3.94373	3.2865	5.1356	5.67815	5.30488	5.5867	5.06388	5.66893	5.70867	7.01523	7.67034	8.26544	8.52727	8.83295	9.16213	9.34723	9.64608	9.83963	9.89555	9.99916	10.3982	10.6683	10.4441	11.3573	12.0558	13.1154	13.1241	12.9965	13.3573	14.2593	14.6056	NA
Iraq		5.44998	2.16341	2.18917	2.16796	2.61053	3.09038	3.65927	4.5772	5.97032	6.47154	4.54242	0.69195	1.0183	1.21122	1.32841	1.35231	1.39037	2.60395	4.7062	5.475	5.62238	5.21719	4.42167	2.84408	4.37814	4.12414	4.39253	4.56197	5.18267	5.17126	5.20917	NA
Israel		0.08111	0.08307	0.00528	0.00424	0.00425	0.00424	0.00361	0.00292	0.00234	0.00217	0.00156	0.0016	0.00149	0.00174	0.00163	0.00121	0.00142	0.00163	0.00142	0.00112	0.00086	0.00075	0.00089	0.00128	0.02807	0.0271	0.0352	0.04128	0.05203	0.04342	0.05714	0.09636
Jordan		0	0	0	0	0	0	0.00221	0.00129	0.00137	0.00361	0.00571	0.00554	0.00582	0.0077	0.01056	0.01098	0.01029	0.01101	0.01058	0.01061	0.01124	0.01128	0.01212	0.01202	0.01212	0.01077	0.01216	0.00976	0.00832	0.00863	0.00865	NA
Kuwait		3.98985	2.62777	1.94451	2.51342	2.76084	2.44003	3.36252	3.76674	3.62745	4.31565	2.83247	0.42947	2.44216	4.28436	4.72709	4.81243	4.94199	4.84719	5.01541	4.59658	5.0356	4.81399	4.58056	5.14197	5.70635	6.10784	6.12513	5.97294	6.28005	5.6817	5.62367	NA
Lebanon		0.00874	0.00879	0.00672	0.00583	0.00604	0.00605	0.00579	0.00629	0.00613	0.00516	0.00309	0.00517	0.00564	0.00735	0.00835	0.00732	0.00817	0.00911	0.00792	0.00336	0.00454	0.00341	0.00683	0.01382	0.01111	0.01036	0.00682	0.00572	0.00364	0.00601	0.00811	NA
Oman		0.63842	0.72125	0.74034	0.86006	0.94353	1.13109	1.2796	1.34033	1.41194	1.49303	1.58777	1.64273	1.72201	1.81675	1.90235	1.99453	2.06667	2.13079	2.19684	2.16611	2.42716	2.47904	2.48393	2.34919	2.25829	2.38494	2.44763	2.3978	2.50239	2.64139	2.83647	NA
Palestinian Territories		--	--	--	--	--	--	--	--	--	--	--	--	--	--	--	--	--	0	0	0	0	0	0	0	0	0	0	0	0	0	0	NA
Qatar		1.1995	1.05173	0.93208	0.8389	1.09073	0.87617	0.88195	0.85843	0.98986	1.05965	1.2004	1.24548	1.39076	1.44609	1.44338	1.50724	1.65525	1.89992	2.30829	2.37092	2.81917	2.71167	2.74406	2.9468	3.44967	3.92422	4.16911	4.61907	5.32855	5.82077	6.55231	NA
Saudi Arabia		22.4342	22.437	15.1044	11.9226	11.2896	8.64186	12.0362	10.8418	12.8564	12.8088	15.9203	19.7469	20.3921	20.108	20.3903	20.6591	20.8153	21.2433	21.4151	20.1783	21.5931	20.9456	20.2696	23.0489	24.159	25.44	24.6105	23.736	25.1682	22.837	24.7442	26.2289
Syria		0.41093	0.4091	0.39891	0.41301	0.42618	0.43947	0.47585	0.56909	0.64495	0.82995	1.00242	1.25601	1.23646	1.40996	1.4264	1.43832	1.51129	1.47877	1.50249	1.47965	1.46229	1.36589	1.4207	1.40259	1.3801	1.28683	1.23044	1.15751	1.12626	1.13277	1.22779	NA
United Arab Emirates		3.88781	3.45406	2.99906	2.90859	3.0035	3.29178	3.67804	4.20936	4.22196	4.9942	5.51239	6.24061	6.11006	5.78346	5.83578	6.14019	6.34013	6.50094	6.60659	6.25346	6.76686	6.59336	6.49905	7.12961	7.42447	7.59008	7.86848	7.91494	8.12802	7.5188	7.64098	NA
Yemen		0	0	0	0	0	0	0.02085	0.04193	0.3627	0.40564	0.40331	0.41078	0.38153	0.45974	0.70005	0.72086	0.71336	0.75733	0.81039	0.85469	0.91729	0.92129	0.91812	0.89731	0.84735	0.83619	0.78345	0.66597	0.62513	0.62592	0.7781	NA
Algeria		2.80332	3.03742	3.22547	3.60602	3.85789	3.9071	3.96829	4.21747	4.29745	4.50276	4.75332	4.91623	5.03106	4.88426	4.7356	5.0482	5.24834	5.59212	5.74876	6.01955	6.19057	6.17016	6.39056	6.78907	6.90113	7.47971	7.41833	7.32433	7.37697	7.06014	7.12205	NA
Angola		0.33508	0.29133	0.27626	0.39581	0.46249	0.51127	0.62143	0.78933	0.98944	0.99075	1.03779	1.09201	1.15235	1.11255	1.16856	1.40407	1.54205	1.54876	1.59583	1.61454	1.62241	1.60922	1.94122	1.95654	2.29303	2.72101	3.09019	3.80233	4.33183	4.17418	4.25945	NA
Benin		0	0	0	0.00896	0.01573	0.01793	0.01793	0.01569	0.01124	0.00897	0.00897	0.00897	0.01258	0.01295	0.01329	0.00673	0.00451	0.00298	0.00226	0.00226	0.00157	0.00159	0.00181	0.00092	1e-05	1e-05	5e-05	4e-05	4e-05	2e-05	2e-05	NA
Botswana		0.009	0.00922	0.01004	0.00958	0.00953	0.0106	0.01211	0.01405	0.01486	0.01608	0.01926	0.01901	0.02186	0.02158	0.02183	0.02496	0.02053	0.01991	0.02378	0.02421	0.02427	0.02383	0.02442	0.02109	0.02339	0.02524	0.02465	0.02122	0.02332	0.01891	0.02532	NA
Burkina Faso		0	0	0	0	0	0	0	0	0	0	9e-05	0.00014	0.00021	0.00048	0.00074	0.00097	0.00118	0.00117	0.0008	0.00126	0.00099	0.00055	0.00065	0.00098	0.00101	0.00099	0.00079	0.00109	0.00133	0.00128	0.00117	NA
Burundi		2e-05	2e-05	2e-05	0.00024	0.00041	0.00048	0.00064	0.00098	0.00106	0.00106	0.00111	0.00115	0.00108	0.00111	0.00118	0.00121	0.00121	0.00123	0.00111	0.00099	0.001	0.00118	0.00128	0.00102	0.0009	0.00095	0.00091	0.00115	0.00109	0.00117	0.00146	NA
Cameroon		0.14028	0.20759	0.25784	0.26857	0.31588	0.42564	0.40828	0.40175	0.38056	0.39624	0.37669	0.36038	0.33271	0.30251	0.26182	0.2691	0.26449	0.30049	0.29309	0.25088	0.21945	0.20194	0.18362	0.18123	0.18255	0.21604	0.2329	0.21894	0.21981	0.20718	0.1904	NA
Cape Verde		0	0	0	0	0	0	0	0	0	0	0	0	0	2e-05	5e-05	6e-05	7e-05	7e-05	8e-05	8e-05	8e-05	6e-05	6e-05	5e-05	6e-05	6e-05	7e-05	7e-05	6e-05	7e-05	7e-05	NA
Central African Republic		0.00069	0.00068	0.00071	0.00067	0.00072	0.00063	0.00079	0.00076	0.00076	0.00077	0.00079	0.00078	0.0008	0.00079	0.00081	0.00082	0.00084	0.00085	0.00083	0.00083	0.00085	0.00085	0.00083	0.00085	0.00124	0.00133	0.00138	0.00134	0.00134	0.00132	0.00132	NA
Chad		0	0	0	0	0	0	0	0	0	0	0	0	0	0	0	0	0	0	0	0	0	0	0	0.08215	0.38959	0.40236	0.35967	0.32844	0.29002	0.26192	0.28736	NA
Comoros		2e-05	2e-05	2e-05	2e-05	2e-05	2e-05	2e-05	2e-05	2e-05	2e-05	2e-05	2e-05	2e-05	2e-05	2e-05	2e-05	2e-05	2e-05	2e-05	2e-05	2e-05	2e-05	3e-05	4e-05	5e-05	5e-05	5e-05	5e-05	5e-05	5e-05	5e-05	NA
Congo (Brazzaville)		0.13906	0.1768	0.19021	0.18668	0.25929	0.25826	0.25424	0.26445	0.30758	0.35009	0.35315	0.33406	0.37245	0.3856	0.38304	0.40021	0.42988	0.55731	0.581	0.5927	0.61463	0.55982	0.54721	0.53852	0.51381	0.5022	0.52947	0.46191	0.52161	0.5985	0.69223	NA
Congo (Kinshasa)		0.09029	0.08974	0.09525	0.10326	0.12055	0.12598	0.12617	0.12593	0.12215	0.12386	0.12221	0.11652	0.12015	0.11249	0.11234	0.12988	0.12946	0.11392	0.10656	0.1037	0.11894	0.11509	0.11273	0.11229	0.1183	0.11857	0.11985	0.12725	0.11919	0.12592	0.12437	NA
Cote dIvoire (IvoryCoast)		0.01613	0.03311	0.03748	0.06075	0.06215	0.07434	0.05539	0.05143	0.03858	0.01735	0.01792	0.01727	0.01397	0.01228	0.02667	0.03691	0.07312	0.08159	0.08654	0.0996	0.09255	0.09202	0.09062	0.10686	0.12051	0.14526	0.1954	0.18372	0.20399	0.20269	0.1641	NA
Djibouti		0	0	0	0	0	0	0	0	0	0	0	0	0	0	0	0	0	0	0	0	0	0	0	0	0	0	0	0	0	0	0	NA
Egypt		1.45253	1.48126	1.69107	1.84143	2.07993	2.23297	2.09272	2.29913	2.23788	2.31967	2.3613	2.39558	2.38828	2.48069	2.52162	2.59908	2.64948	2.51307	2.47665	2.59377	2.54665	2.69116	2.66743	2.85199	2.85779	3.12929	3.19001	3.24947	3.76189	3.92275	3.85434	NA
Equatorial Guinea		2e-05	2e-05	2e-05	2e-05	2e-05	2e-05	2e-05	2e-05	2e-05	2e-05	2e-05	0.00022	0.00312	0.009	0.00999	0.00999	0.0342	0.10458	0.1663	0.20419	0.3361	0.36298	0.47093	0.45991	0.7387	0.79029	0.7615	0.83106	0.92684	0.90958	0.87262	NA
Eritrea		--	--	--	--	--	--	--	--	--	--	--	--	--	--	0	0	0	1e-05	1e-05	1e-05	1e-05	1e-05	1e-05	1e-05	1e-05	1e-05	2e-05	2e-05	2e-05	2e-05	2e-05	NA
Ethiopia		0.00491	0.00525	0.006	0.00655	0.00713	0.0078	0.00858	0.00923	0.00987	0.01037	0.01132	0.01145	0.01166	0.0129	0.01382	0.01458	0.01546	0.01583	0.0162	0.01645	0.01668	0.02038	0.02038	0.02311	0.02501	0.02805	0.032	0.03312	0.03229	0.03429	0.04781	NA
Gabon		0.38239	0.331	0.34239	0.34865	0.3502	0.37864	0.36474	0.34436	0.35325	0.45758	0.5907	0.64295	0.65255	0.68263	0.71751	0.7963	0.80548	0.80801	0.76846	0.72355	0.68997	0.59228	0.55256	0.53136	0.52779	0.58404	0.52275	0.53563	0.54639	0.53186	0.53917	NA
Gambia, The		0	0	0	0	0	0	0	0	0	0	0	0	0	0	0	0	0	0	0	0	0	0	0	0	0	0	0	0	0	0	0	NA
Ghana		0.05913	0.06014	0.05596	0.03114	0.0231	0.03345	0.0465	0.04821	0.04967	0.05402	0.05892	0.0634	0.06996	0.06767	0.06527	0.07091	0.08086	0.0801	0.0495	0.06533	0.08196	0.08278	0.06589	0.05455	0.0676	0.06872	0.06818	0.04947	0.07347	0.07945	0.08314	NA
Guinea		0.00154	0.00155	0.00155	0.00161	0.00162	0.00168	0.0017	0.00172	0.00173	0.00177	0.0018	0.00184	0.00184	0.00186	0.00188	0.00197	0.00202	0.00291	0.00313	0.004	0.00414	0.00564	0.00599	0.00406	0.0055	0.00489	0.00452	0.00527	0.00516	0.00505	0.00506	NA
Guinea-Bissau		0	0	0	0	0	0	0	0	0	0	0	0	0	0	0	0	0	0	0	0	0	0	0	0	0	0	0	0	0	0	0	NA
Kenya		0.01228	0.01613	0.01691	0.01957	0.01931	0.02237	0.02334	0.02418	0.02874	0.0306	0.03161	0.03388	0.03365	0.03562	0.03528	0.03757	0.03965	0.03793	0.03827	0.02982	0.02098	0.03281	0.03856	0.04434	0.042	0.04316	0.04537	0.04734	0.04254	0.03727	0.05054	NA
Lesotho		0	0	0	0	0	0	0	0	0	0	0	0	0	0	0	0	0	0	0	0.00199	0.00294	0.00294	0.00319	0.00333	0.00298	0.00347	0.00196	0.00196	0.00197	0.00195	0.00195	NA
Liberia		0.00344	0.00328	0.00343	0.00337	0.00233	0.00271	0.00329	0.00329	0.00331	0.00324	0	0	0	0	0	0	0	0	0	0	0	0	0	0	0	0	0	0	0	0	0	NA
Libya		4.02923	2.57372	2.61321	2.52341	2.52606	2.46198	2.43448	2.29436	2.73466	2.70148	3.18319	3.43161	3.34229	3.16907	3.20515	3.22788	3.27629	3.386	3.26037	3.06773	3.29768	3.20746	3.11209	3.30084	3.60892	3.99044	4.22291	4.36583	4.46458	4.27305	4.30594	NA
Madagascar		0.00152	0.00159	0.00236	0.00258	0.00263	0.00266	0.00278	0.00298	0.0031	0.00328	0.00352	0.00346	0.00354	0.00355	0.00358	0.00381	0.00435	0.0046	0.0051	0.00527	0.00551	0.00546	0.00544	0.00619	0.00635	0.00641	0.00626	0.00704	0.00682	0.00716	0.00694	NA
Malawi		0.00403	0.00396	0.00423	0.00466	0.00484	0.00491	0.00529	0.00581	0.00581	0.0059	0.00725	0.00775	0.00794	0.00795	0.00837	0.00858	0.00875	0.00884	0.01015	0.01146	0.01245	0.01203	0.01265	0.01336	0.0139	0.01422	0.01469	0.01505	0.01633	0.01758	0.01819	NA
Mali		0.00086	0.00086	0.0011	0.00128	0.00139	0.00139	0.00165	0.00167	0.00171	0.00175	0.00188	0.0019	0.00215	0.00225	0.00227	0.0023	0.00217	0.00232	0.00235	0.00235	0.00238	0.00242	0.0024	0.0024	0.00249	0.00255	0.00261	0.00265	0.00274	0.00275	0.00293	NA
Mauritania		0.00026	0.00031	0.0004	0.00041	0.00038	0.00032	0.00019	0.00026	0.00026	0.00026	0.00026	0.00026	0.00027	0.00027	0.00029	0.00029	0.00029	0.00031	0.00029	0.00031	0.00033	0.00035	0.00035	0.00042	0.00044	0.00049	0.06594	0.03257	0.02809	0.02511	0.01872	NA
Mauritius		0.00085	0.00062	0.00097	0.00037	0.00068	0.00119	0.00114	0.00145	0.00102	0.00153	0.00087	0.00077	0.00116	0.00106	0.00077	0.00138	0.00105	0.00094	0.00106	0.00317	0.00515	0.00537	0.00524	0.0056	0.00573	0.00543	0.00492	0.00517	0.00559	0.00568	0.00608	NA
Morocco		0.0427	0.03956	0.03564	0.03537	0.03578	0.0358	0.03639	0.03267	0.03379	0.03152	0.03252	0.03323	0.03035	0.02611	0.03167	0.02918	0.03819	0.03555	0.02892	0.01795	0.01214	0.01384	0.01293	0.0191	0.02078	0.01493	0.01498	0.0141	0.01528	0.0319	0.0432	NA
Mozambique		0.14486	0.04353	0.03634	0.05427	0.00684	0.0025	0.00147	0.00141	0.00172	0.00165	0.004	0.00447	0.00441	0.00459	0.00481	0.00492	0.00514	0.01032	0.01783	0.08042	0.10009	0.12405	0.13095	0.11408	0.11914	0.13858	0.20497	0.25287	0.25429	0.26126	0.27412	NA
Namibia		--	--	--	--	--	--	--	--	--	--	0	0	0	0	0	0.01155	0.00874	0.00617	0.01001	0.01183	0.01393	0.01401	0.01471	0.01533	0.01589	0.01641	0.01577	0.01542	0.01454	0.01362	0.01205	NA
Niger		0.00056	0.00083	0.00125	0.00361	0.00417	0.00419	0.00344	0.00456	0.00431	0.00475	0.00478	0.00478	0.00472	0.00478	0.00478	0.00481	0.00465	0.00446	0.00446	0.00448	0.00405	0.00418	0.00469	0.00484	0.00606	0.00466	0.00452	0.00439	0.00469	0.00577	0.00577	NA
Nigeria		4.49512	3.18214	2.85824	2.76943	3.1177	3.3565	3.31135	3.05266	3.30309	3.9016	4.06938	4.30004	4.42704	4.4509	4.36981	4.52545	4.56371	4.84978	4.89851	4.89075	5.17804	5.45362	5.15444	5.70931	5.89869	6.52299	6.32475	6.27464	5.89862	5.71368	6.37551	NA
Reunion		0.00314	0.00387	0.00441	0.0045	0.00422	0.00505	0.00519	0.00546	0.00432	0.00513	0.00566	0.00476	0.00507	0.00508	0.00509	0.00513	0.0062	0.00653	0.00766	0.0077	0.00769	0.00781	0.00782	0.00791	0.00781	0.00784	0.00779	0.00856	0.00959	0.00942	0.00937	NA
Rwanda		0.00115	0.00108	0.00139	0.00159	0.00168	0.00169	0.00156	0.00171	0.00172	0.00178	0.00172	0.0017	0.00176	0.00158	0.00161	0.00163	0.00145	0.00163	0.00163	0.0013	0.00112	0.00091	0.00099	0.00119	0.00083	0.00065	0.00038	0.00042	0.00067	0.00096	0.00108	NA
Saint Helena		0	0	0	0	0	0	0	0	0	0	0	0	0	0	0	0	0	0	0	0	0	0	0	0	0	0	0	0	0	0	0	NA
Sao Tome and Principe		7e-05	7e-05	8e-05	6e-05	8e-05	8e-05	7e-05	8e-05	8e-05	8e-05	8e-05	8e-05	8e-05	8e-05	8e-05	8e-05	8e-05	8e-05	7e-05	9e-05	0.0001	4e-05	6e-05	7e-05	6e-05	4e-05	8e-05	0.0001	0.00012	0.00012	0.0001	NA
Senegal		0	0	0	0	0	0	0	0	0	0	0.00046	0.00046	0.00046	0.0011	0.00173	0.00207	0.00239	0.00176	0.00177	0.00178	0.00213	0.00223	0.00425	0.00558	0.00494	0.00478	0.00442	0.00375	0.00414	0.00442	0.00358	NA
Seychelles		0	0	0	0	0	0	0	0	0	0	0	0	0	0	0	0	0	0	0	0	0	0	0	0	0	0	0	0	0	0	0	NA
Sierra Leone		0	0	0	0	0	0	0	0	0	0	0	0	0	0	0	0	0	0	0	0	0.00015	0.00015	0.00016	0.00016	0.00016	0.00018	4e-05	0.00018	0.0002	0.00049	0.00098	NA
Somalia		0	0	0	0	0	0	0	0	0	0	0	0	0	0	0	0	0	0	0	0	0	0	0	0.0001	0	0	0	0	0	0	0	NA
South Africa		2.71516	3.06821	3.17324	3.28133	3.71563	3.97925	4.09735	4.06884	4.23474	4.1214	4.04577	4.11971	4.21439	4.3043	4.59804	4.84064	4.85562	5.43784	5.52473	5.43444	5.57823	5.61823	5.52086	5.91416	6.06469	6.05236	6.03843	6.04461	6.13933	6.06113	6.1797	NA
Sudan and South Sudan		0.00514	0.00772	0.00799	0.00804	0.00783	0.00955	0.00955	0.00954	0.00948	0.00966	0.01517	0.01605	0.01698	0.01695	0.01691	0.01555	0.01999	0.02514	0.03429	0.14551	0.36325	0.40631	0.46122	0.51756	0.65343	0.66706	0.72015	0.87984	0.90836	0.93329	0.99094	NA
Swaziland		0.00585	0.00558	0.00521	0.00332	0.00457	0.00622	0.00601	0.00616	0.00626	0.00652	0.00571	0.00528	0.00468	0.00337	0.00678	0.00656	0.00563	0.01089	0.01086	0.0134	0.01091	0.01349	0.01511	0.01177	0.01238	0.01312	0.01289	0.01352	0.01373	0.01431	0.01464	NA
Tanzania		0.01028	0.01071	0.0108	0.0113	0.0115	0.01175	0.01127	0.01219	0.01281	0.01501	0.01606	0.01794	0.01701	0.01851	0.01648	0.01694	0.01936	0.01537	0.02213	0.02384	0.02366	0.02862	0.02942	0.02726	0.02944	0.03421	0.03431	0.04587	0.04843	0.05162	0.05565	NA
Togo		0.00039	0.0004	0.0006	0.0002	0.0004	0.00079	0.00079	0.00079	0.00078	0.00099	0.00099	0.00201	0.00132	0.00237	0.00153	0.00263	0.00196	0.00095	0.00175	0.00208	0.00101	0.00052	0.00087	0.00126	0.00082	0.00075	0.00092	0.00099	0.00091	0.00093	0.00096	NA
Tunisia		0.24451	0.26206	0.27131	0.26812	0.27474	0.25465	0.24907	0.24208	0.23764	0.24149	0.21584	0.23432	0.25259	0.2251	0.21118	0.2004	0.2158	0.24518	0.2474	0.25329	0.24552	0.24304	0.25185	0.25646	0.27034	0.26405	0.26645	0.24373	0.2371	0.26533	0.25834	NA
Uganda		0.00658	0.00536	0.0058	0.0054	0.00639	0.00656	0.00669	0.00638	0.006	0.00707	0.00792	0.00801	0.01006	0.00988	0.01029	0.01067	0.01145	0.01266	0.0128	0.01286	0.01582	0.01597	0.01697	0.01794	0.01892	0.01839	0.01231	0.01461	0.01686	0.0145	0.01546	NA
Western Sahara		0	0	0	0	0	0	0	0	0	0	0	0	0	0	0	0	0	0	0	0	0	0	0	0	0	0	0	0	0	0	0	NA
Zambia		0.10831	0.11426	0.11926	0.11617	0.11541	0.1161	0.11552	0.09898	0.09911	0.08051	0.09015	0.08943	0.09053	0.08831	0.08365	0.08391	0.07719	0.08416	0.08088	0.08272	0.08304	0.08573	0.08683	0.08919	0.08686	0.09162	0.09824	0.09625	0.09432	0.10035	0.1089	NA
Zimbabwe		0.1255	0.11969	0.11179	0.12834	0.11936	0.11579	0.14148	0.15611	0.1637	0.15864	0.17237	0.18788	0.17902	0.16037	0.14874	0.1436	0.14079	0.12906	0.13079	0.15414	0.14736	0.14202	0.14495	0.1497	0.14652	0.15503	0.13467	0.13462	0.10701	0.11265	0.12207	NA
Afghanistan		0.07309	0.09328	0.09593	0.10015	0.10049	0.12165	0.12127	0.11579	0.12196	0.12031	0.1193	0.02092	0.01704	0.01709	0.01717	0.01302	0.01374	0.01342	0.01329	0.01351	0.01376	0.00766	0.00803	0.00809	0.00727	0.00748	0.00795	0.0151	0.01676	0.02198	0.02678	NA
American Samoa		0	0	0	0	0	0	0	0	0	0	0	0	0	0	0	0	0	0	0	0	0	0	0	0	0	0	0	0	0	0	0	NA
Australia		3.24549	3.71959	3.73669	4.13781	4.54319	4.99634	5.20336	5.71826	5.275	5.57147	6.15646	6.43652	6.62589	6.65152	6.91856	7.42946	7.58233	8.31145	8.6614	8.84458	9.65711	10.248	10.4563	10.3256	10.5196	11.214	11.5887	11.8949	11.8643	12.3844	12.9157	12.84
Bangladesh		0.05354	0.06163	0.06809	0.07198	0.09963	0.10319	0.11246	0.13037	0.14972	0.16539	0.16351	0.17329	0.20443	0.22201	0.24416	0.26365	0.27221	0.27474	0.2957	0.32458	0.35052	0.37372	0.40765	0.45666	0.49525	0.5347	0.59122	0.62385	0.69297	0.75483	0.76325	NA
Bhutan		6e-05	7e-05	9e-05	9e-05	9e-05	9e-05	0.00315	0.0122	0.01582	0.01599	0.01607	0.01629	0.01767	0.01747	0.01841	0.01957	0.02087	0.01997	0.01946	0.0195	0.01956	0.02202	0.02443	0.02732	0.0241	0.02838	0.04689	0.06688	0.07107	0.06886	0.07182	NA
Brunei		0.94578	0.8059	0.76411	0.78974	0.73602	0.71032	0.73572	0.68908	0.68177	0.67202	0.7236	0.68119	0.70466	0.71122	0.72212	0.75137	0.72705	0.7413	0.70295	0.7752	0.81625	0.83679	0.79287	0.82807	0.85055	0.88785	0.99211	0.88344	0.8424	0.75403	0.78395	NA
Burma (Myanmar)		0.08633	0.08161	0.09327	0.09711	0.10659	0.10714	0.10508	0.09135	0.07892	0.08776	0.08339	0.08559	0.08568	0.08998	0.10111	0.10022	0.09542	0.09425	0.10055	0.08939	0.16654	0.27682	0.38026	0.43438	0.45857	0.57129	0.56937	0.60379	0.56444	0.53502	0.5597	NA
Cambodia		0.00051	0.00055	0.00057	0.00042	0.00031	0.00037	0.00042	0.00047	0.00052	0.00056	0.00064	0.00067	0.00069	0.00071	0.00073	0.00075	0.0008	0.00058	0.00051	0.00045	0.00048	0.00032	0.00031	0.0005	0.00042	0.00059	0.00064	0.00064	0.00061	0.00057	0.00048	NA
China		18.122	17.9451	18.9211	20.2361	22.1268	23.3052	24.0433	24.9412	26.1483	27.778	28.3878	28.8239	29.5269	30.5842	32.5067	33.5387	35.1037	38.4407	38.8876	37.5003	38.7841	41.6731	46.2296	51.249	55.9233	63.9524	68.2333	73.2809	78.3599	84.0644	90.3918	97.8325
Cook Islands		0	0	0	0	0	0	0	0	0	0	0	0	0	0	0	0	0	0	0	0	0	0	0	0	0	0	0	0	0	0	0	NA
Fiji		0	0	0	0.00052	0.00298	0.00304	0.00365	0.00381	0.00358	0.00362	0.00417	0.00418	0.0042	0.00419	0.00439	0.00459	0.00461	0.0046	0.00447	0.00481	0.00443	0.00499	0.00478	0.00373	0.00388	0.00359	0.00358	0.00532	0.00527	0.00488	0.00443	NA
French Polynesia		0	0	0	0.00017	0.00025	0.00033	0.00037	0.00036	0.0006	0.00067	0.00072	0.00077	0.00093	0.00097	0.00099	0.00129	0.00138	0.00136	0.00154	0.00089	0.00118	0.00108	0.00133	0.00158	0.00178	0.00177	0.00196	0.00217	0.00206	0.00203	0.00168	NA
Guam		0	0	0	0	0	0	0	0	0	0	0	0	0	0	0	0	0	0	0	0	0	0	0	0	0	0	0	0	0	0	0	NA
Hawaiian Trade Zone		0	0	0	0	0	0	0	--	--	--	--	--	--	--	--	--	--	--	--	--	--	--	--	--	--	--	--	--	--	--	--	--
Hong Kong		0	0	0	0	0	0	0	0	0	0	0	0	0	0	0	0	0	0	0	0	0	0	0	0	0	0	1e-05	1e-05	1e-05	1e-05	1e-05	NA
India		3.10139	3.72959	3.97552	4.33795	4.95498	5.26619	5.67757	5.64275	6.16515	6.46779	6.82097	7.16245	7.33294	7.4851	8.00116	9.48442	8.74731	9.16678	9.36894	9.58659	9.83335	10.2934	9.94791	10.5093	11.0876	11.7386	12.3904	13.0289	13.5655	14.5676	15.2944	16.0023
Indonesia		4.22713	4.3349	3.71025	3.84971	4.29466	4.19652	4.39746	4.39443	4.56944	4.98064	5.30246	5.8978	6.08234	6.31535	6.65181	6.94953	7.43122	7.38603	7.5064	7.96615	7.68644	7.56632	7.76478	8.07966	8.46661	9.05921	10.7728	11.3112	11.4306	12.5776	13.781	NA
Japan		2.35261	2.3552	2.48792	2.63441	2.75303	3.0949	3.1025	3.34973	3.34297	3.34943	3.52272	3.70024	3.62057	3.98664	3.8644	4.25542	4.34437	4.58148	4.68939	4.4706	4.51402	4.4759	4.17453	3.75124	4.15686	4.22103	4.32446	3.83189	3.79091	3.98551	4.14117	2.945
Kiribati		0	0	0	0	0	0	0	0	0	0	0	0	0	0	0	0	0	0	0	0	0	0	0	0	0	0	0	0	0	0	0	NA
Korea, North		1.21016	1.25139	1.31266	1.32527	1.35957	1.42365	1.41666	1.39641	1.72229	1.37727	1.31551	1.27369	1.10018	1.01042	0.96089	0.90919	0.81704	0.75206	0.68433	0.76066	0.80628	0.83046	0.80191	0.83494	0.87693	0.95389	0.9589	0.85468	0.90694	0.8725	0.89422	NA
Korea, South		0.38113	0.40548	0.4109	0.46793	0.5198	0.60003	0.74339	0.86058	0.84809	0.87078	0.86259	0.84462	0.78723	0.76896	0.71593	0.77189	0.81909	0.84291	0.97558	1.10282	1.15655	1.18055	1.22683	1.34134	1.34387	1.49644	1.51217	1.46379	1.53563	1.51575	1.53337	1.56243
Laos		0.00956	0.01139	0.0119	0.01073	0.00982	0.00898	0.0086	0.00556	0.00505	0.00692	0.00852	0.00917	0.0089	0.00896	0.00882	0.0114	0.01371	0.01446	0.02209	0.03069	0.04018	0.04011	0.04082	0.03619	0.0402	0.04175	0.04323	0.04776	0.0491	0.0471	0.04564	NA
Macau		0	0	0	0	0	0	0	0	0	0	0	0	0	0	0	0	0	0	0	0	0	0	0	0	0	0	0	0	0	0	0	NA
Malaysia		0.66094	0.63012	0.70799	0.93106	1.30802	1.42628	1.65591	1.67885	1.80991	1.92322	2.03265	2.19211	2.26333	2.33823	2.41047	2.59193	2.83647	3.00953	3.14305	3.15873	3.31433	3.34123	3.43291	3.6602	3.77393	3.6043	3.58031	3.66826	3.78166	3.71599	3.69959	NA
Maldives		0	0	0	0	0	0	0	0	0	0	0	0	0	0	0	0	0	0	0	0	0	0	0	0	0	0	0	0	0	0	0	NA
Mongolia		0.05377	0.04801	0.06005	0.06073	0.06117	0.0727	0.07848	0.08746	0.09654	0.09077	0.08052	0.09697	0.08113	0.07063	0.06381	0.07003	0.04594	0.0421	0.04351	0.04302	0.04481	0.04453	0.04838	0.04669	0.04794	0.10065	0.11203	0.1386	0.16307	0.25426	0.52721	NA
Nauru		0	0	0	0	0	0	0	0	0	0	0	0	0	0	0	0	0	0	0	0	0	0	0	0	0	0	0	0	0	0	0	NA
Nepal		0.0019	0.00225	0.00223	0.00338	0.00357	0.00353	0.00456	0.00566	0.00575	0.00559	0.00912	0.00945	0.00861	0.00897	0.00968	0.01198	0.01229	0.01113	0.0117	0.01474	0.01691	0.01917	0.02164	0.02321	0.02406	0.02522	0.02736	0.02758	0.02772	0.03035	0.03135	NA
New Caledonia		0.00287	0.0028	0.00427	0.00292	0.00414	0.005	0.00416	0.00265	0.00544	0.00538	0.00474	0.00355	0.00354	0.00353	0.00388	0.00433	0.00403	0.00368	0.00401	0.00478	0.00454	0.00382	0.00331	0.00333	0.00334	0.00356	0.00312	0.00421	0.00476	0.00422	0.00466	NA
New Zealand		0.33037	0.34695	0.37548	0.4061	0.43893	0.46312	0.5355	0.51985	0.56091	0.5774	0.59022	0.61233	0.59702	0.61376	0.63249	0.63448	0.6557	0.6944	0.64686	0.67495	0.68323	0.68203	0.71078	0.64666	0.64881	0.60664	0.63342	0.66545	0.68881	0.70334	0.75036	0.71677
Niue		0	0	0	0	0	0	0	0	0	0	0	0	0	0	0	0	0	0	0	0	0	0	0	0	0	0	0	0	0	0	0	NA
Pakistan		0.42704	0.4611	0.513	0.52024	0.54458	0.5919	0.6478	0.68987	0.74189	0.77732	0.81844	0.88798	0.93657	0.94407	1.0149	1.03809	1.05649	1.06969	1.06017	1.09577	1.14589	1.12375	1.14273	1.25274	1.31914	1.48741	1.64768	1.64187	1.6443	1.65906	1.73372	NA
Papua New Guinea		0.00324	0.00321	0.00315	0.00401	0.00424	0.00435	0.00472	0.00451	0.00454	0.00469	0.00473	0.00516	0.11569	0.26526	0.23172	0.21724	0.22658	0.17497	0.17463	0.21107	0.15724	0.15173	0.12631	0.11845	0.10809	0.09795	0.10747	0.10335	0.09524	0.08713	0.07839	NA
Philippines		0.09641	0.07788	0.10444	0.1226	0.15172	0.15421	0.15275	0.13897	0.15442	0.15797	0.15708	0.14789	0.15692	0.16636	0.17134	0.15873	0.16742	0.15895	0.16421	0.20989	0.22722	0.23032	0.29921	0.35521	0.3971	0.39895	0.38278	0.41154	0.43423	0.45662	0.48245	NA
Samoa		7e-05	7e-05	0.00013	0.00013	0.00017	0.00018	0.00021	0.00019	0.00019	0.00021	0.00021	0.00021	0.00026	0.00026	0.00026	0.00027	0.00031	0.00034	0.00039	0.00044	0.00036	0.0005	0.00063	0.00055	0.0005	0.0005	0.00051	0.00052	0.00052	0.00053	0.00054	NA
Singapore		0	0	0	0	0	0	0	0	0	0	0.00177	0.00511	0.00507	0.00505	0.00505	0.00505	0.00507	0.005	0.005	0.00501	0.005	0.00978	0.00962	0.01014	0.0096	0.00918	0.00946	0.00963	0.01033	0.01038	0.01145	NA
Solomon Islands		0	0	0	0	0	0	0	0	0	0	0	0	0	0	0	0	0	0	0	0	0	0	0	0	0	0	0	0	0	0	0	NA
Sri Lanka		0.01521	0.01626	0.01663	0.01267	0.0216	0.02476	0.02734	0.02244	0.02653	0.02893	0.03239	0.0322	0.02969	0.03874	0.04176	0.04544	0.03328	0.03486	0.03952	0.04224	0.0324	0.03193	0.02726	0.03356	0.02952	0.03434	0.03837	0.03881	0.04049	0.03793	0.05462	NA
Taiwan		0.23774	0.29162	0.30515	0.36043	0.4084	0.4564	0.42368	0.47765	0.41419	0.40858	0.49706	0.42748	0.43898	0.41371	0.4316	0.43531	0.4566	0.44326	0.45769	0.46424	0.46456	0.44403	0.46711	0.4613	0.46877	0.47551	0.46479	0.4769	0.47996	0.4829	0.48955	NA
Thailand		0.02982	0.09129	0.1316	0.15172	0.19852	0.32974	0.33594	0.34759	0.42001	0.44775	0.51678	0.57088	0.59183	0.65407	0.72879	0.8079	0.97443	1.1298	1.12288	1.16594	1.27243	1.30818	1.40481	1.56132	1.59496	1.73512	1.81896	1.93058	2.07455	2.16374	2.35386	NA
Timor-Leste (East Timor)		--	--	--	--	--	--	--	--	--	--	--	--	--	--	--	--	--	--	--	--	--	--	--	0	0.10126	0.1837	0.1963	0.15269	0.19509	0.18728	0.17022	NA
Tonga		0	0	0	0	0	0	0	0	0	0	0	0	0	0	0	0	0	0	0	0	0	0	0	0	0	0	0	0	0	0	0	NA
U.S. Pacific Islands		0	0	0	0	0	0.00017	0.00031	0.00031	0.00031	0.00031	0.00031	0.00031	0.00031	0.00031	0.00031	0.00031	0.00031	0.00031	0.00031	0.00026	0.00026	0.00026	0.00018	0.00018	0.00018	0.00018	0.00018	0.00018	0.00018	0.00018	0.00018	NA
Vanuatu		0	0	0	0	0	0	0	0	0	0	0	0	0	0	0	0	0	0	0	0	0	0	0	0	0	0	0	0	0	0	0	NA
Vietnam		0.13366	0.1538	0.16282	0.16389	0.13408	0.14774	0.16259	0.17745	0.19376	0.23046	0.27555	0.36356	0.43399	0.49939	0.55341	0.71647	0.77598	0.81236	0.95008	1.03766	1.15634	1.32039	1.38336	1.45572	1.76884	1.96771	2.10943	2.15879	2.13827	2.31247	2.32287	NA
Wake Island		0	0	0	0	0	0	0	0	0	0	0	0	0	0	0	0	0	0	0	0	0	0	0	0	0	0	0	0	0	0	0	NA
