# Supplementary material
Source: MDPI journal article supplement (https://www.mdpi.com/1099-4300/15/12/5565)
Supplement: s2 [file s2 › Sources/README.txt]

Raw data files were downloaded from http://www.eia.gov/cfapps/ipdbproject/iedindex3.cfm and placed in "Raw Data/".  
Cleaned data files, ready for automated processing, are in "data/". 
The directory "lib/" contains common routines used by multiple scripts -- these may be useful again to others. 
Finally, "Figure N" directories contain the script used to create the corresponding figure, along with the corresponding figure and an associated processed data file.

The following software versions were used:
 - R version 3.0.2 (2013-09-25)
 - MATLAB R2013b
 - Zeranoe FFmpeg Build Version: git-47e5eaf (2013-11-30,64-bit)
     (http://ffmpeg.zeranoe.com/builds/)
Ffmpeg toolbox for MATLAB is needed when making movies.
 - ffmpeg toolbox (Author: Kesh Ikuma). Download url: 
http://www.mathworks.com/matlabcentral/fileexchange/42296-ffmpeg-toolbox.

The figures were created
  Figures 1, 3a, 5a, 5b, 6a, 8 in R by Scott Lawrence <srl@umd.edu> <bytbox@gmail.com>
  Figures 2, 3b, 4a, 4b, 6b, 7 in Matlab by Qin Liu <qinliu.christoph@gmail.com>
  Movies: in Matlab by Qin Liu <qinliu.christoph@gmail.com>

Plots were finalized 2 Dec 2013.
