# Supplementary material
Source: MDPI journal article supplement (https://www.mdpi.com/1099-4300/15/12/5565)

# CO<sub>2</sub> Emission Parameterized by Population

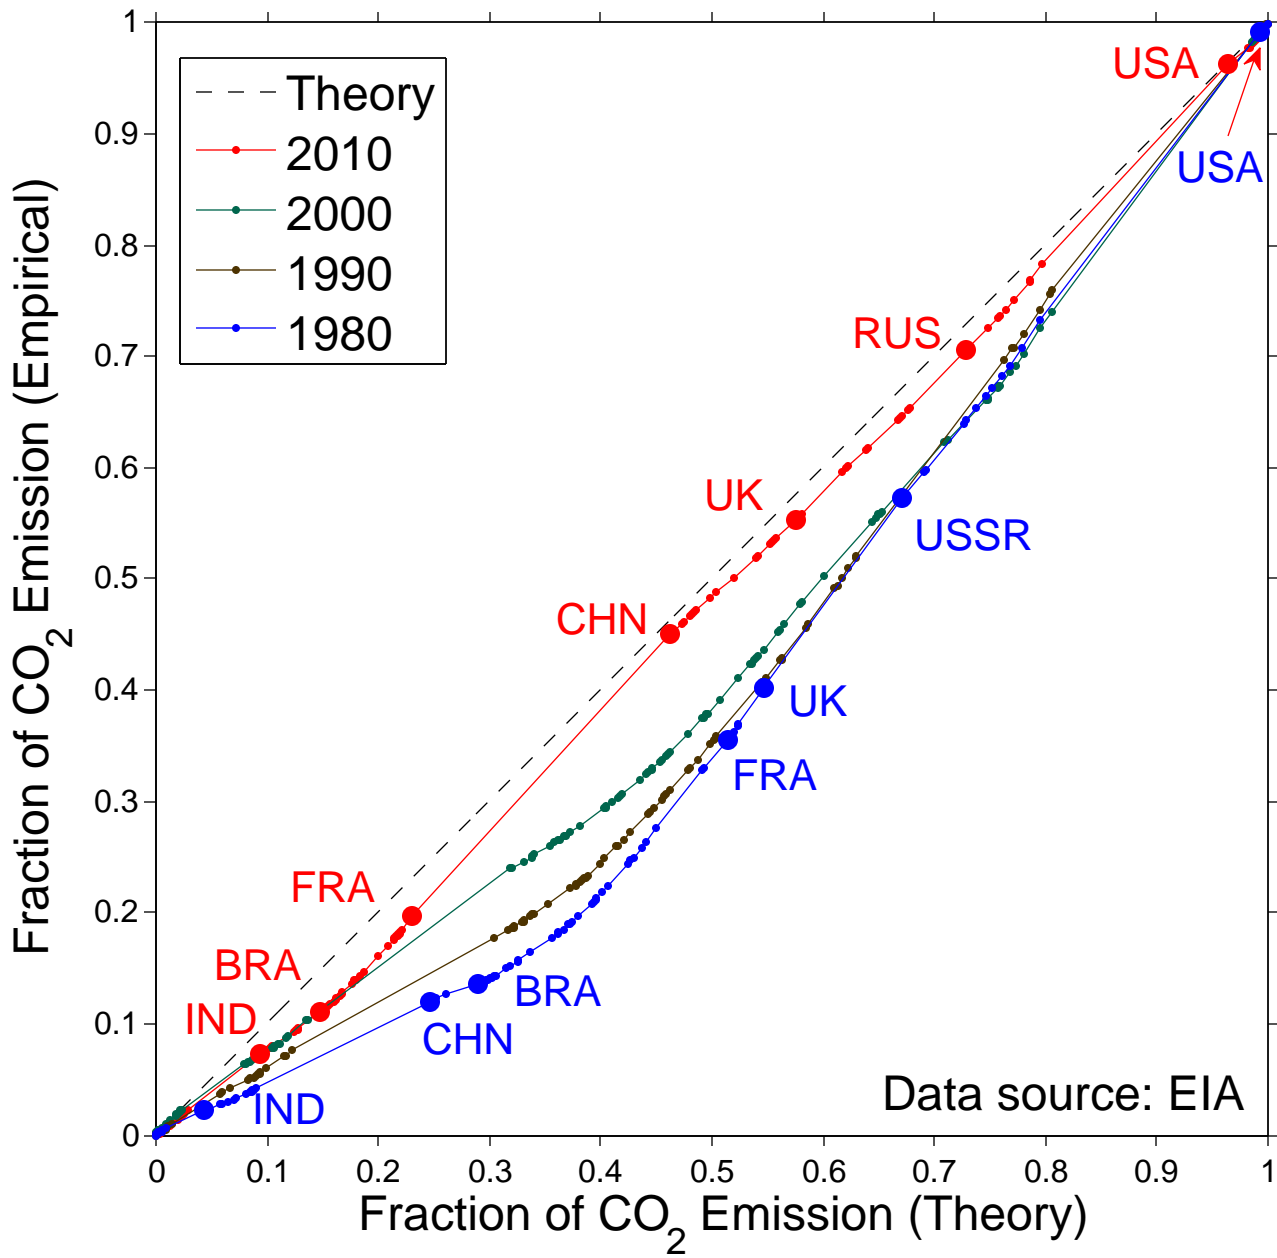

Supplement: s2 [file s2]

# Lorenz Plot of Global CO<sub>2</sub> Emission

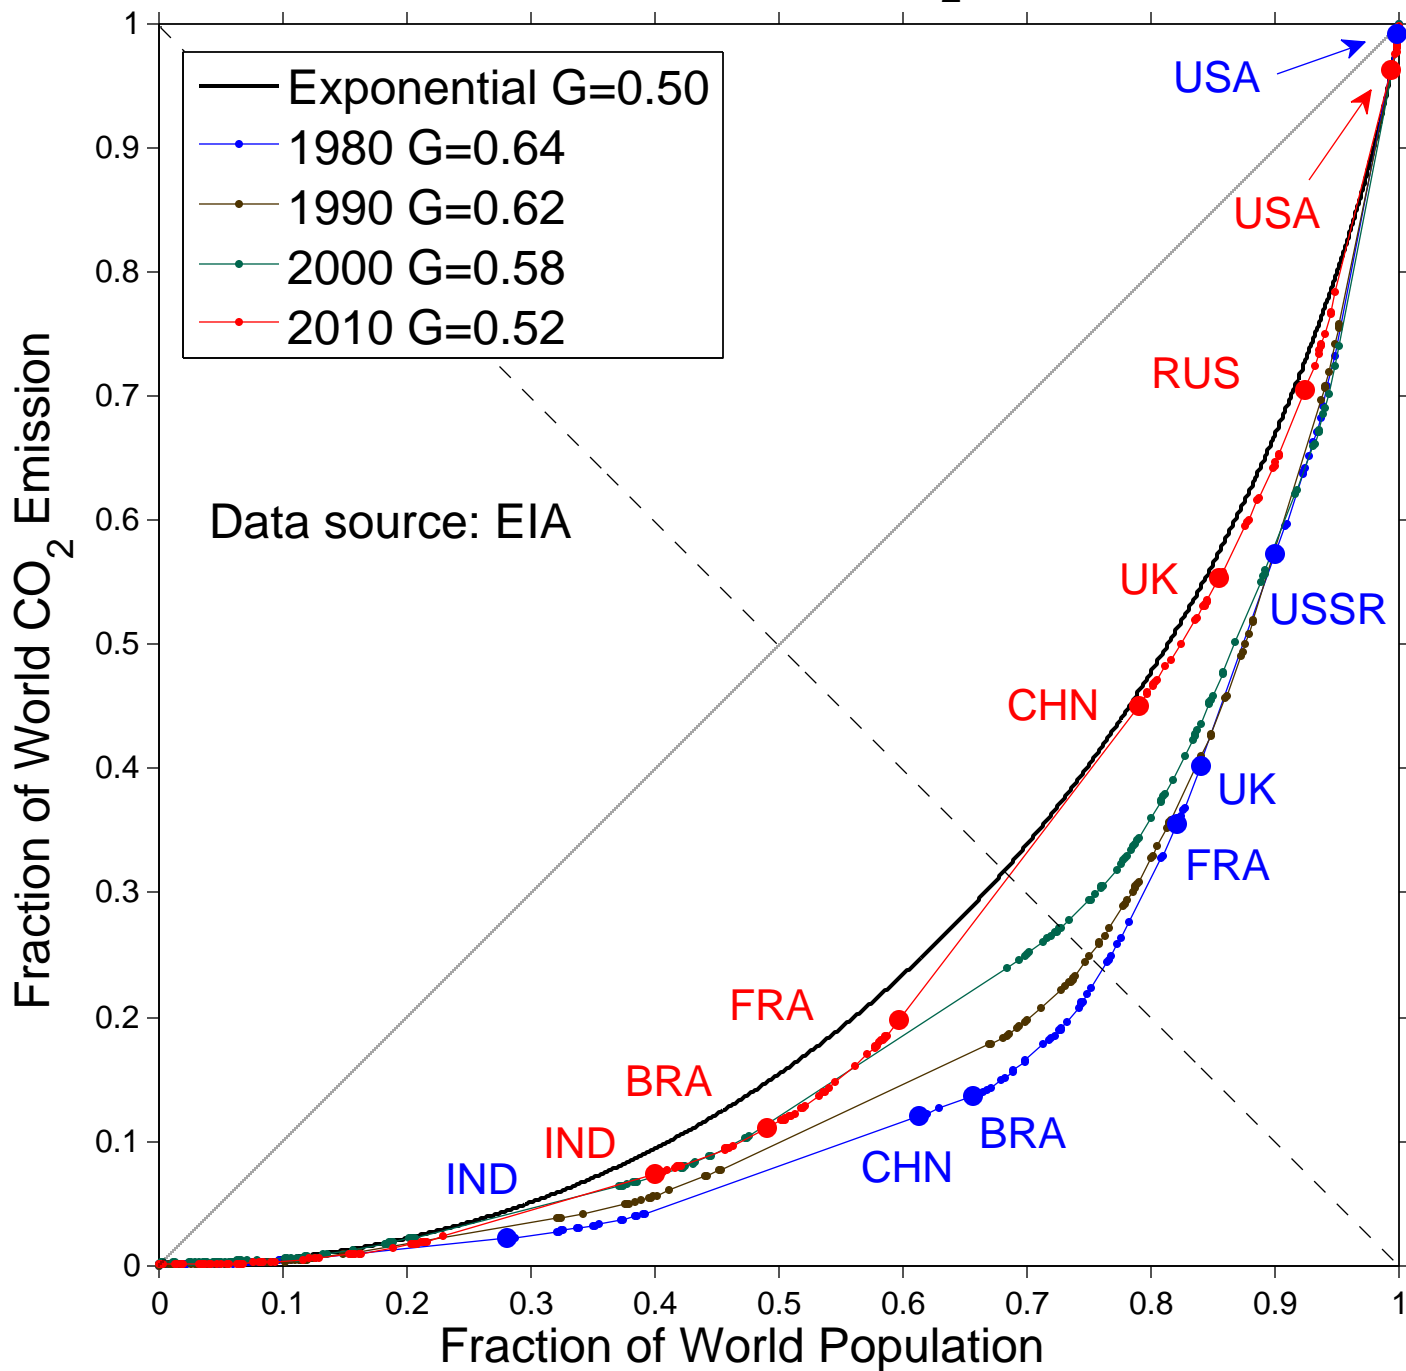

Supplement: s2 [file s2]

# Gini Coefficient of Global Energy Consumption

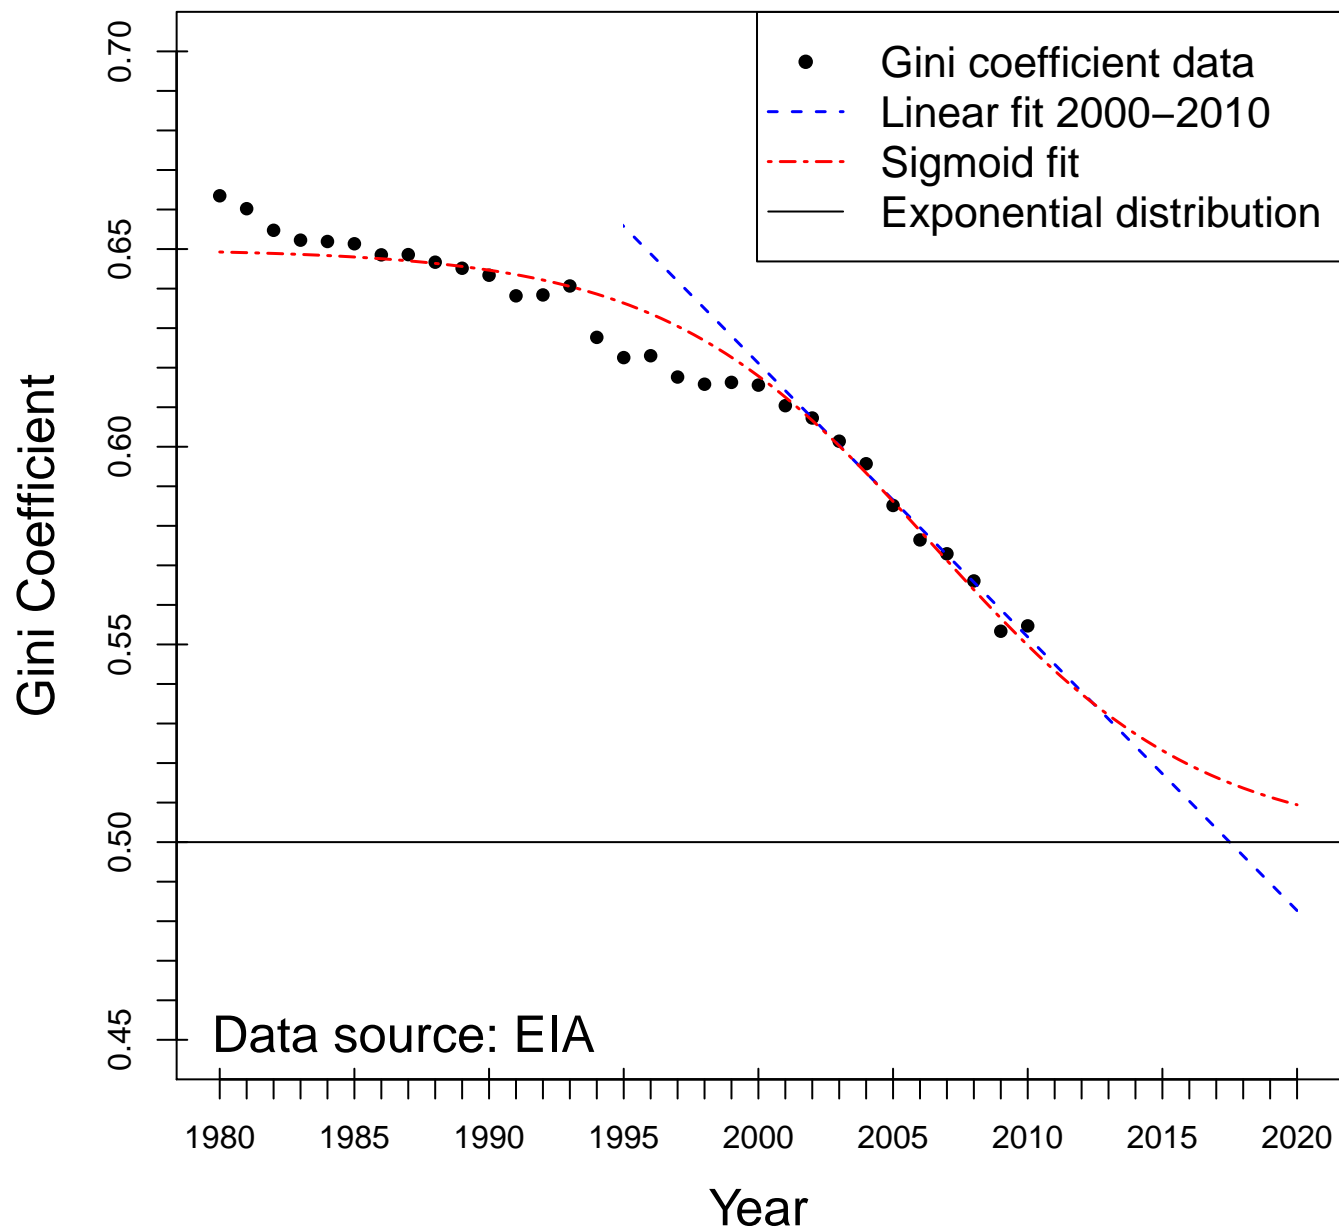

Supplement: s2 [file s2]

# Stack Plot of Global Population

Data source: EIA

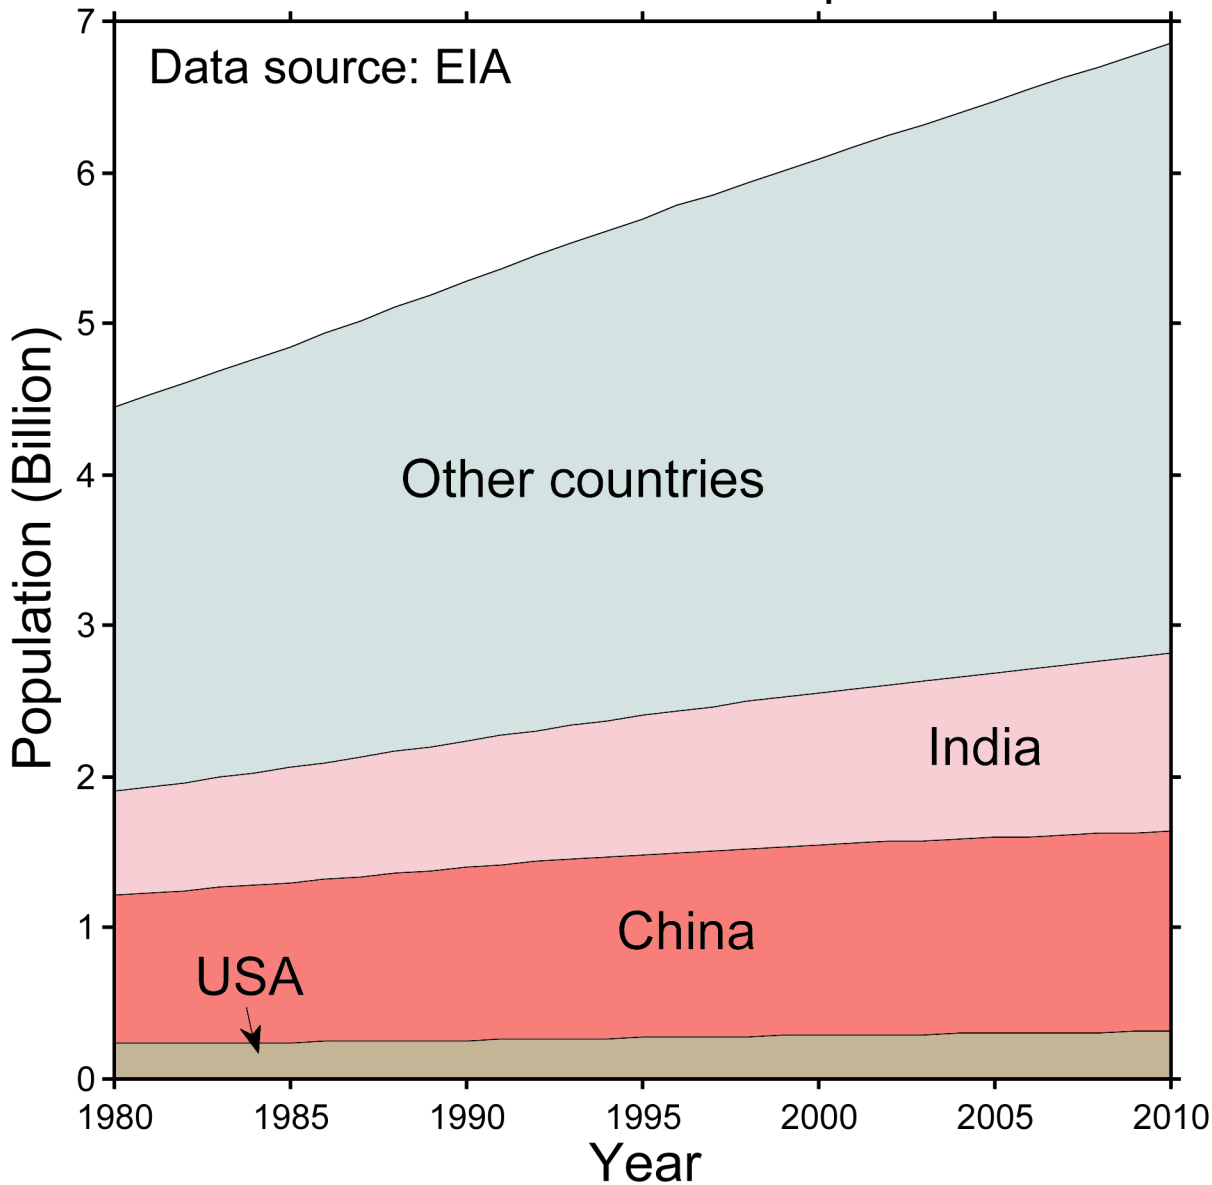

Supplement: s2 [file s2]

# Energy Use and Carbon Emissions

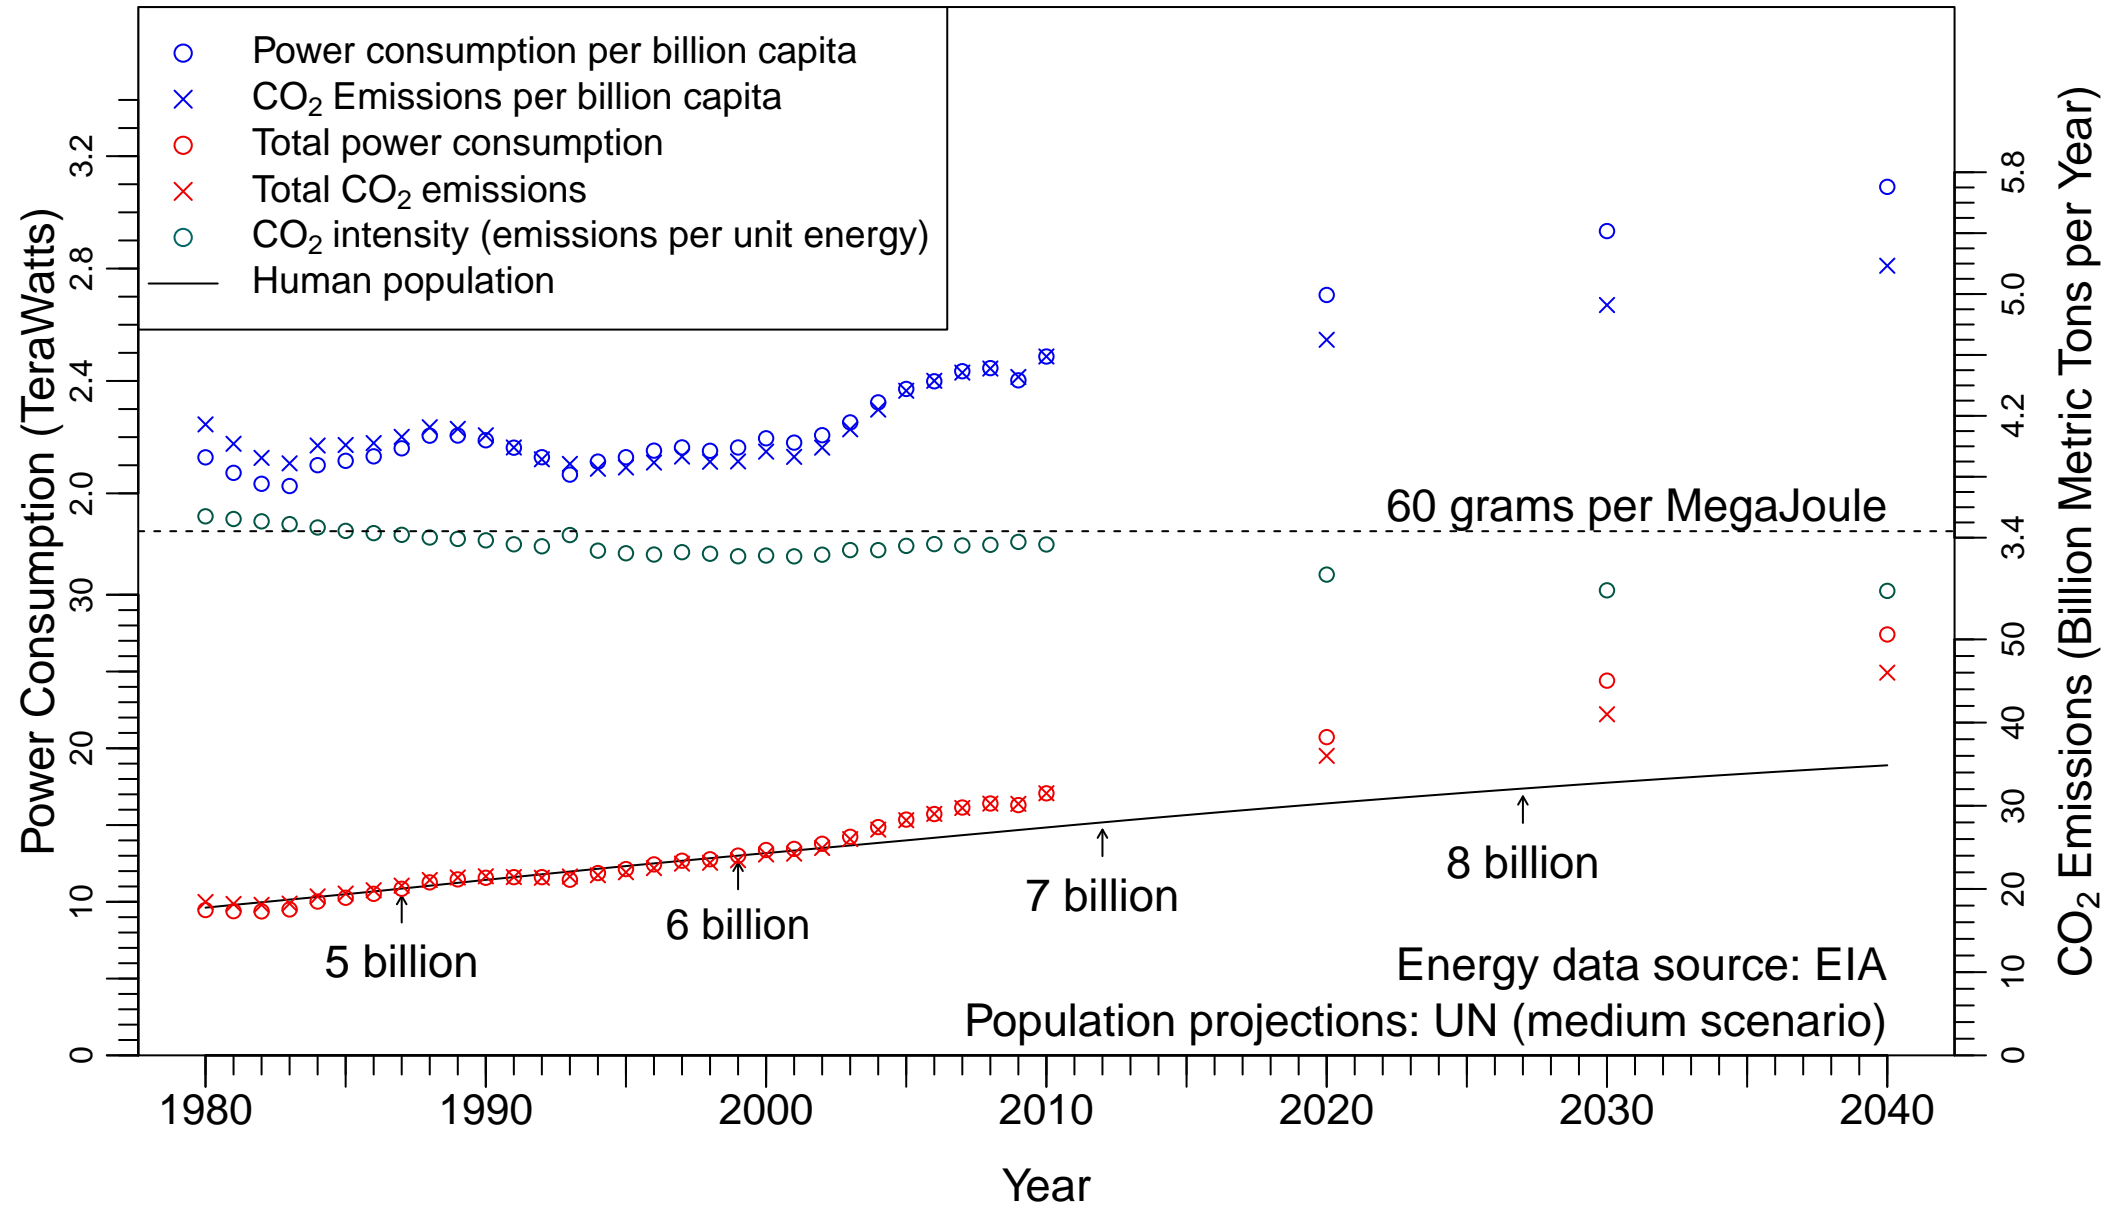

Supplement: s2 [file s2]

# Cumulative Distribution of CO<sub>2</sub> Emission

Fraction of World Population

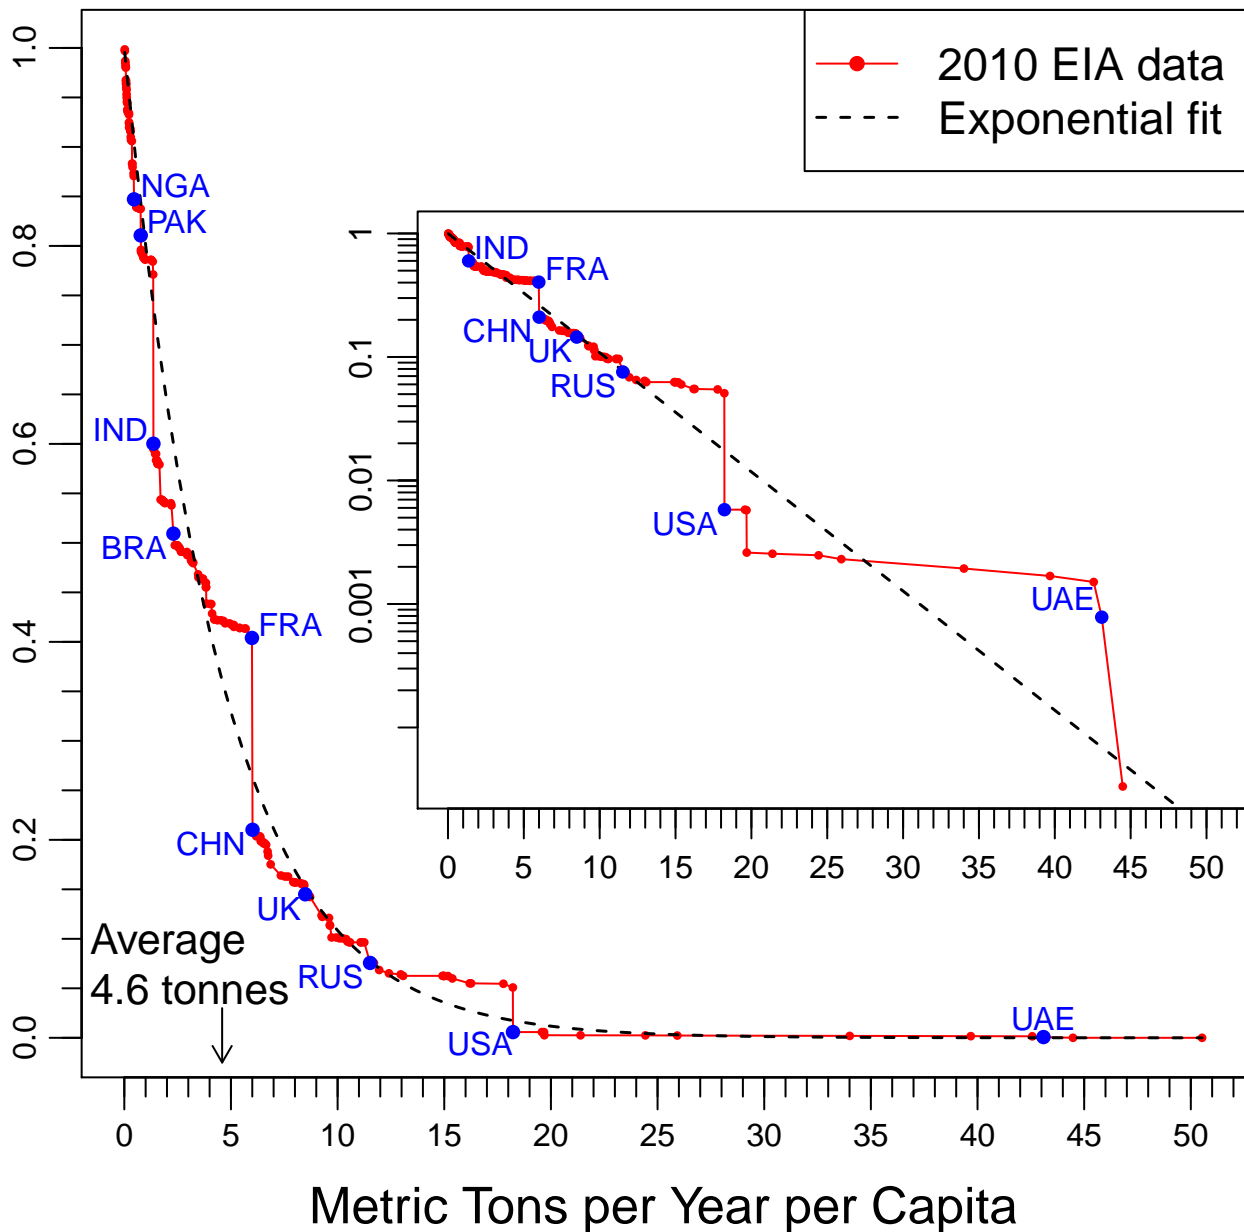

Supplement: s2 [file s2]

# Lorenz Plot of Global Energy Consumption

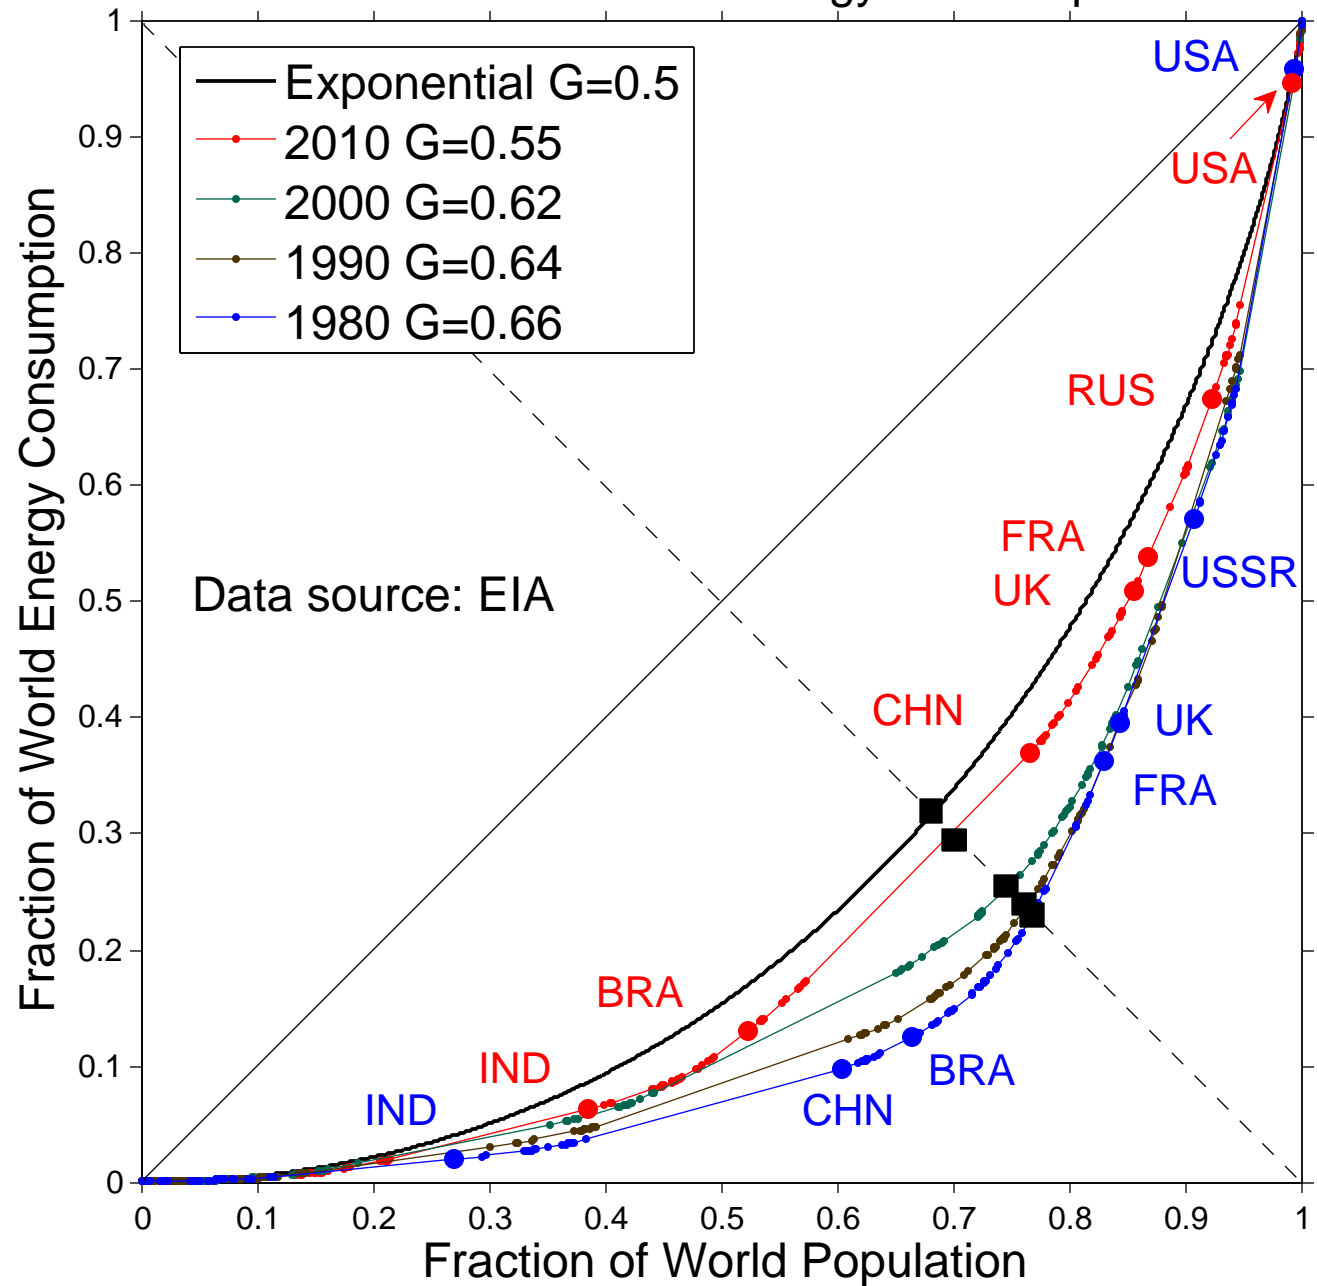

Supplement: s2 [file s2]

# Stack Plot of Global Energy Consumption

Data source: EIA

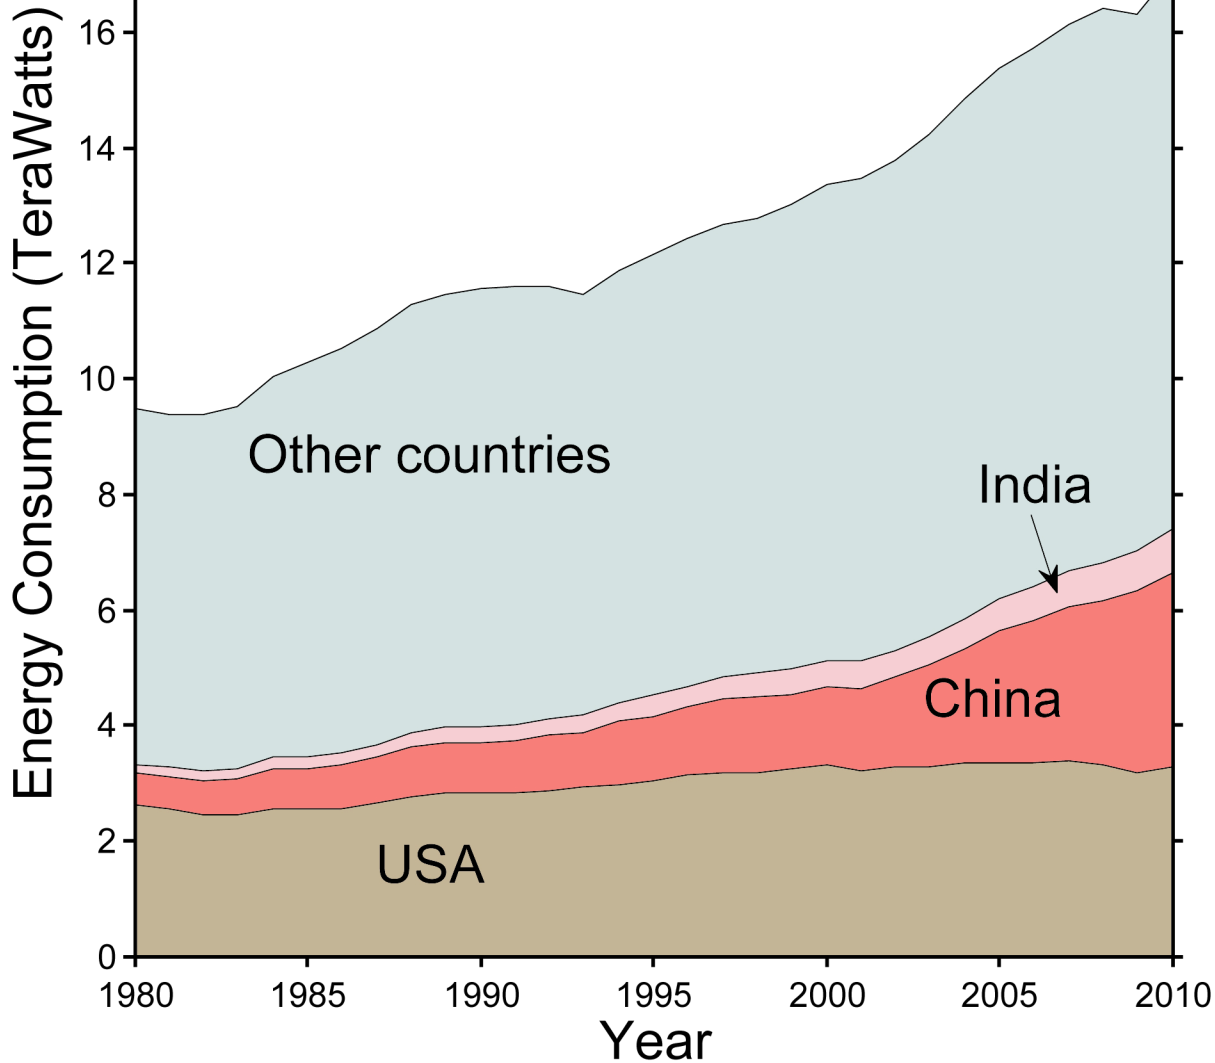

Supplement: s2 [file s2]

# Cumulative Distribution of Energy Consumption

Fraction of World Population

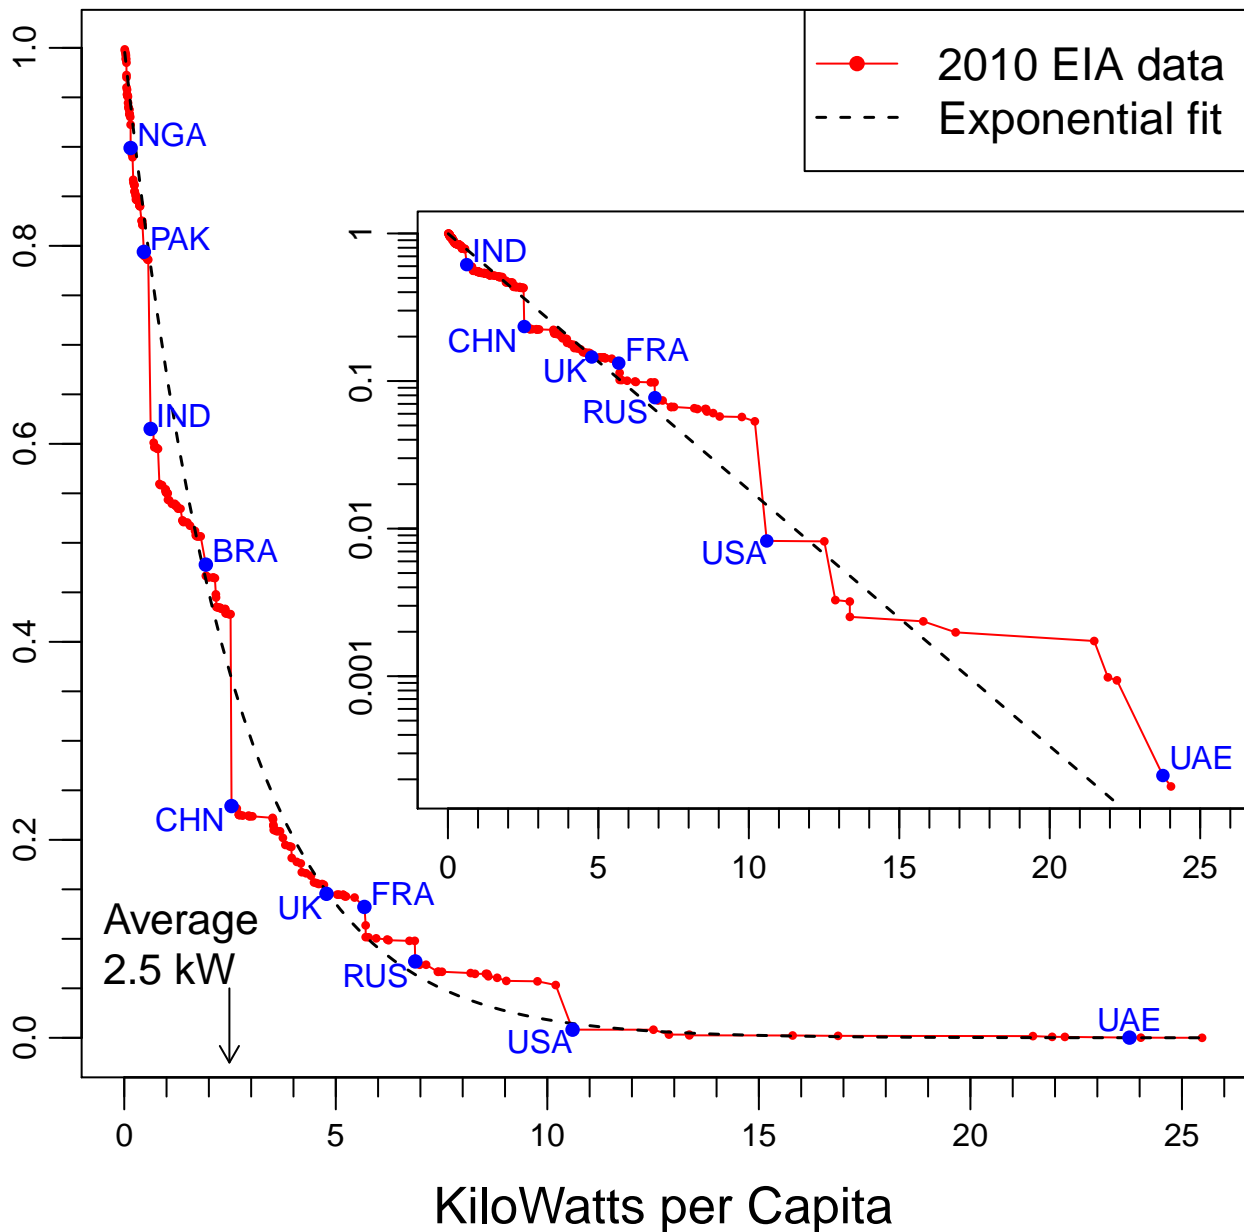

Supplement: s2 [file s2 › Sources/Figure 3a/Figure3a.pdf]

# Energy Parameterized by Population

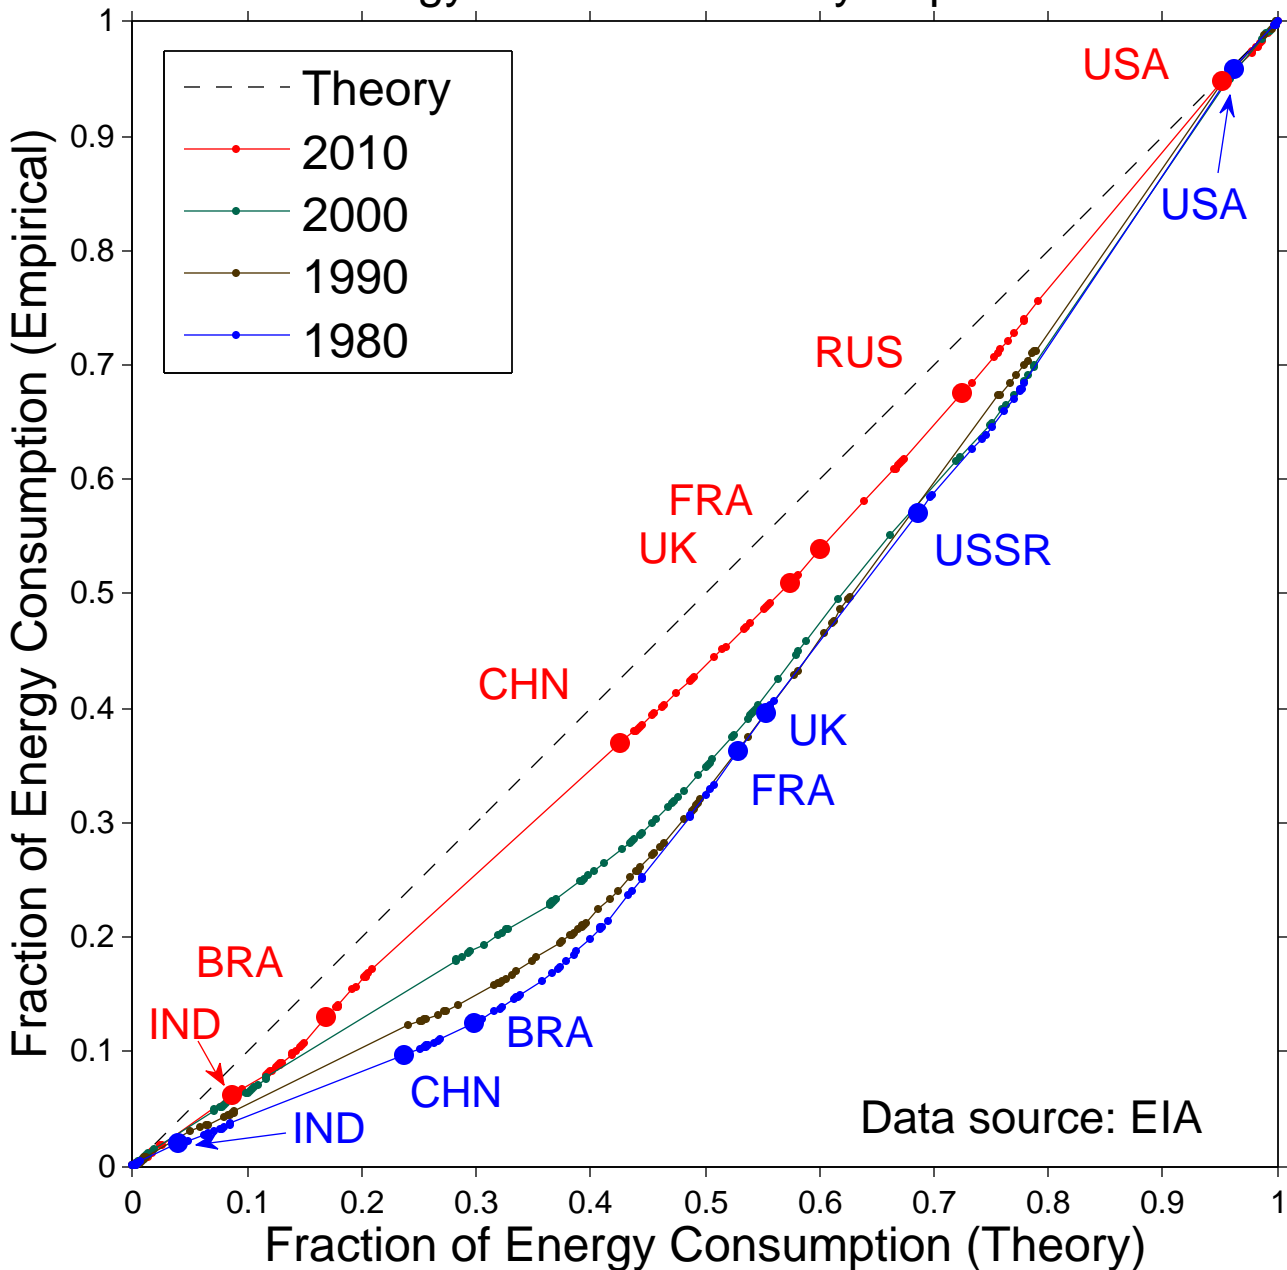

Supplement: s2 [file s2 › Sources/Figure 4/Figure4a.pdf]

# Population Parameterized by Energy

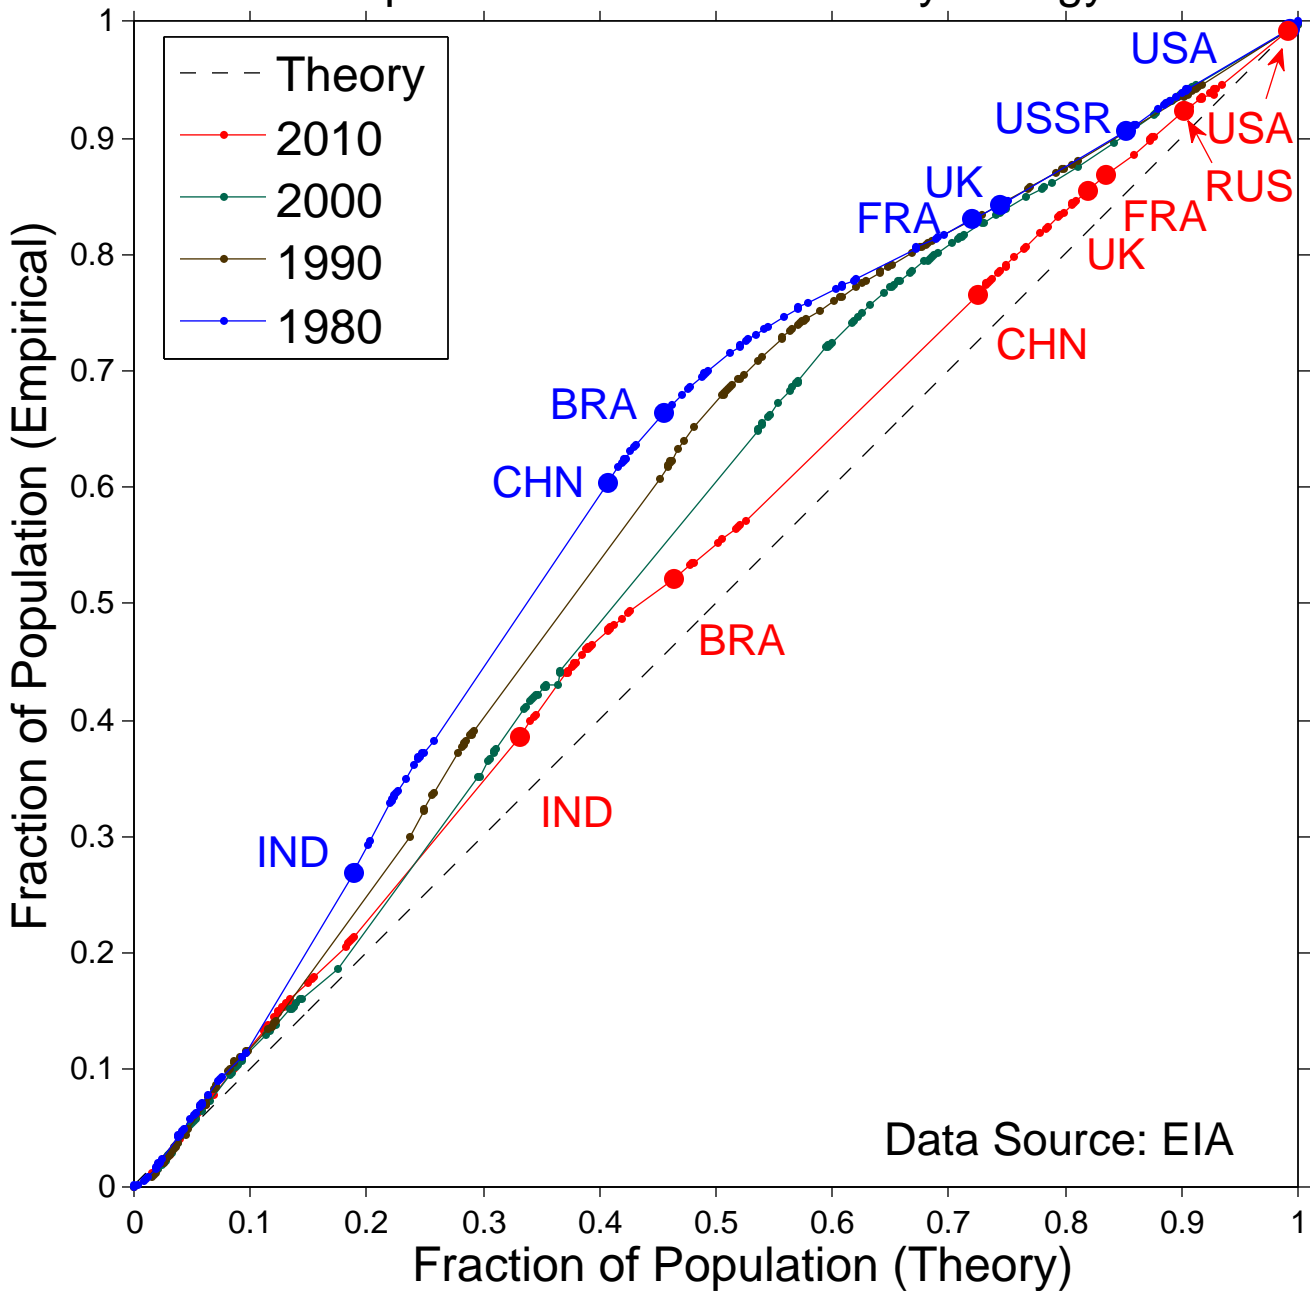

Supplement: s2 [file s2 › Sources/Figure 4/Figure4b.pdf]

# Gini Coefficient of Global CO<sub>2</sub> Emission

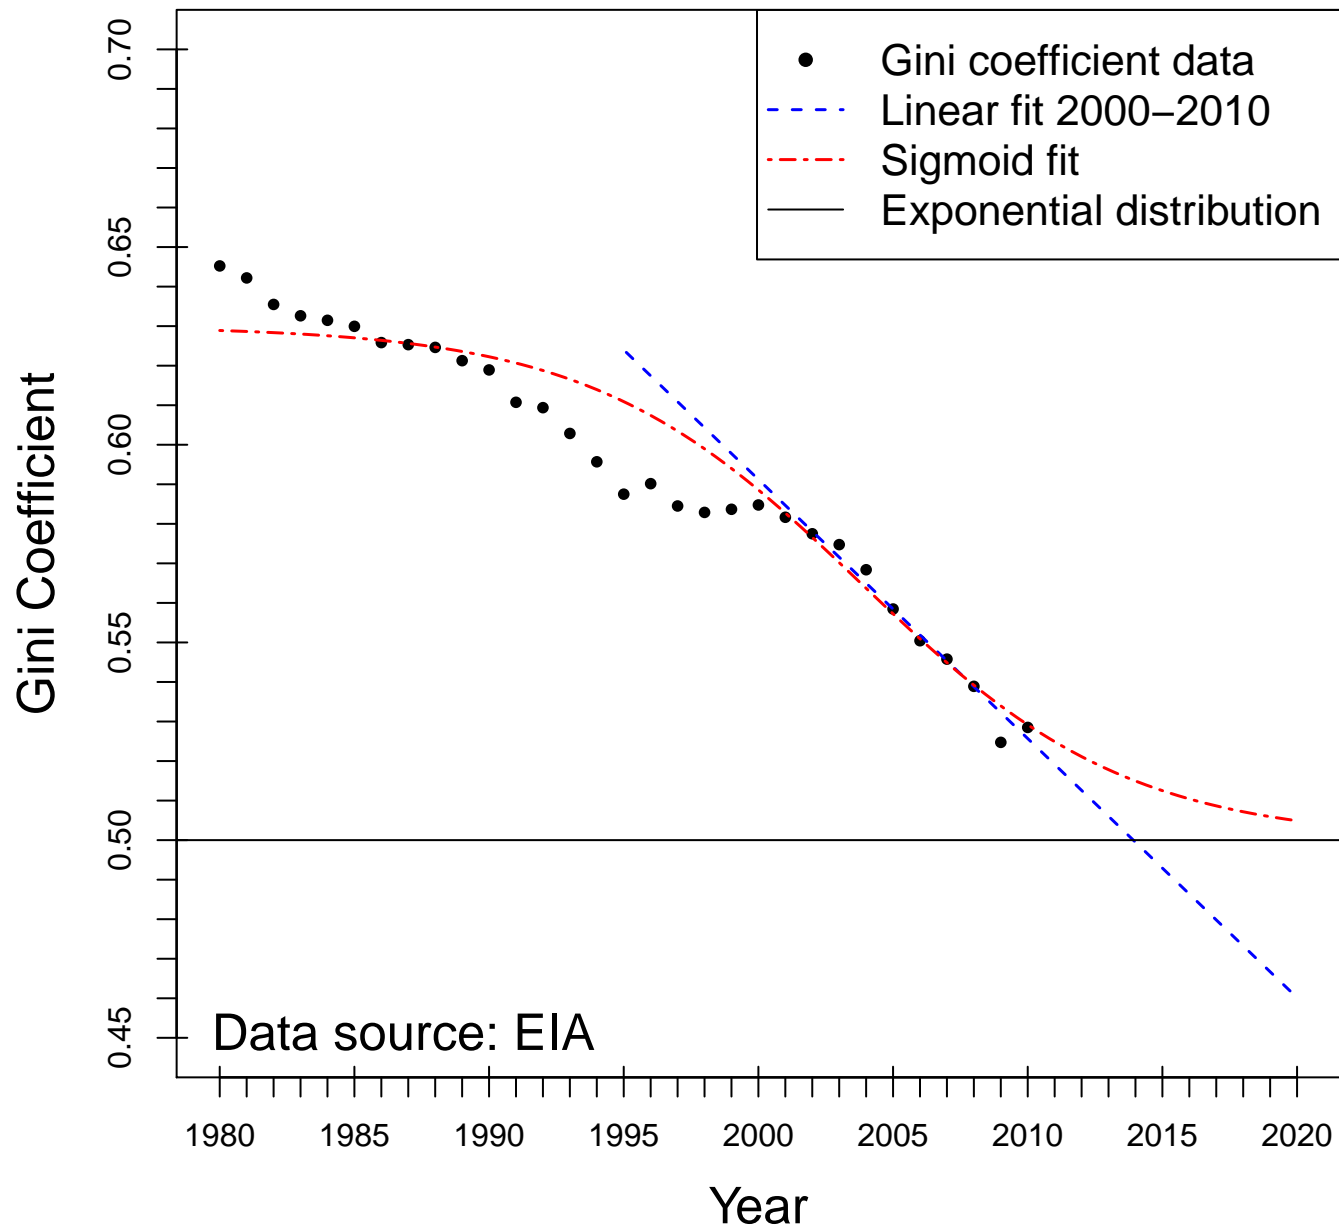

Supplement: s2 [file s2 › Sources/Figure 5b/Figure5b.pdf]

# Population Parameterized by CO<sub>2</sub> Emission

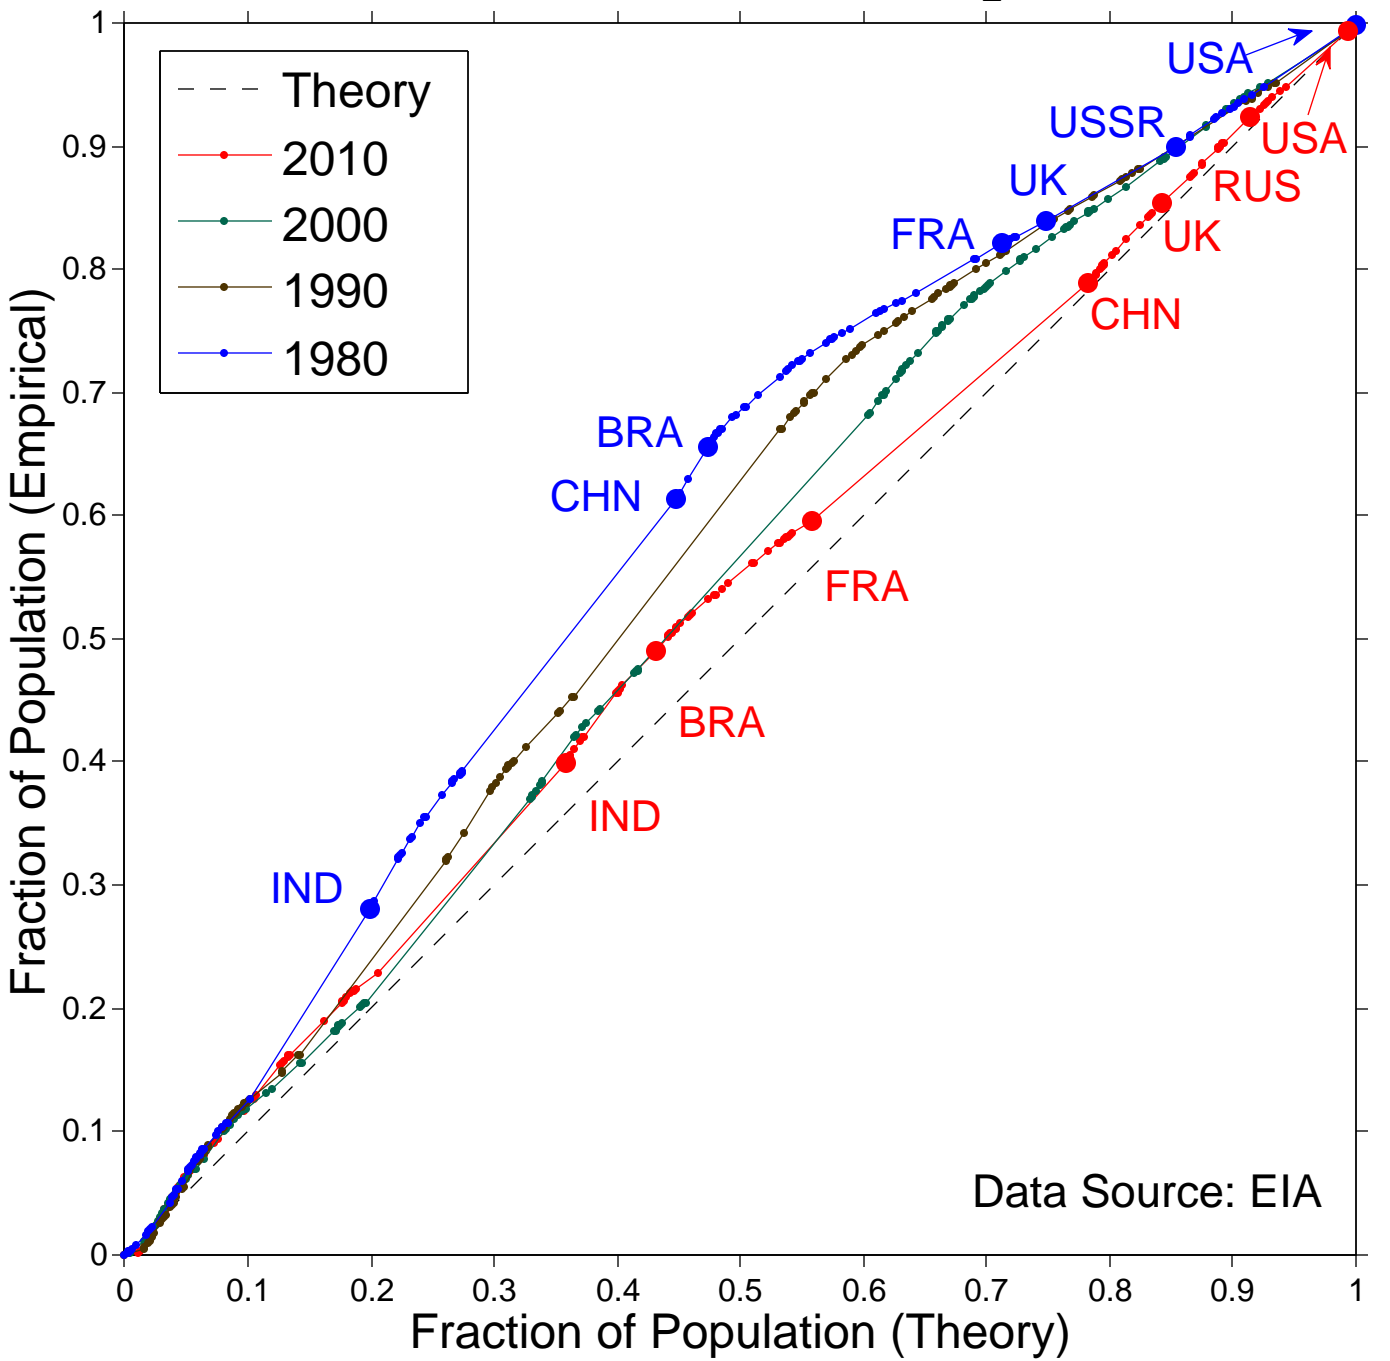

Supplement: s2 [file s2 › Sources/Figure 7/Figure7b.pdf]

# Gini Coefficients of Energy Consumption by Source

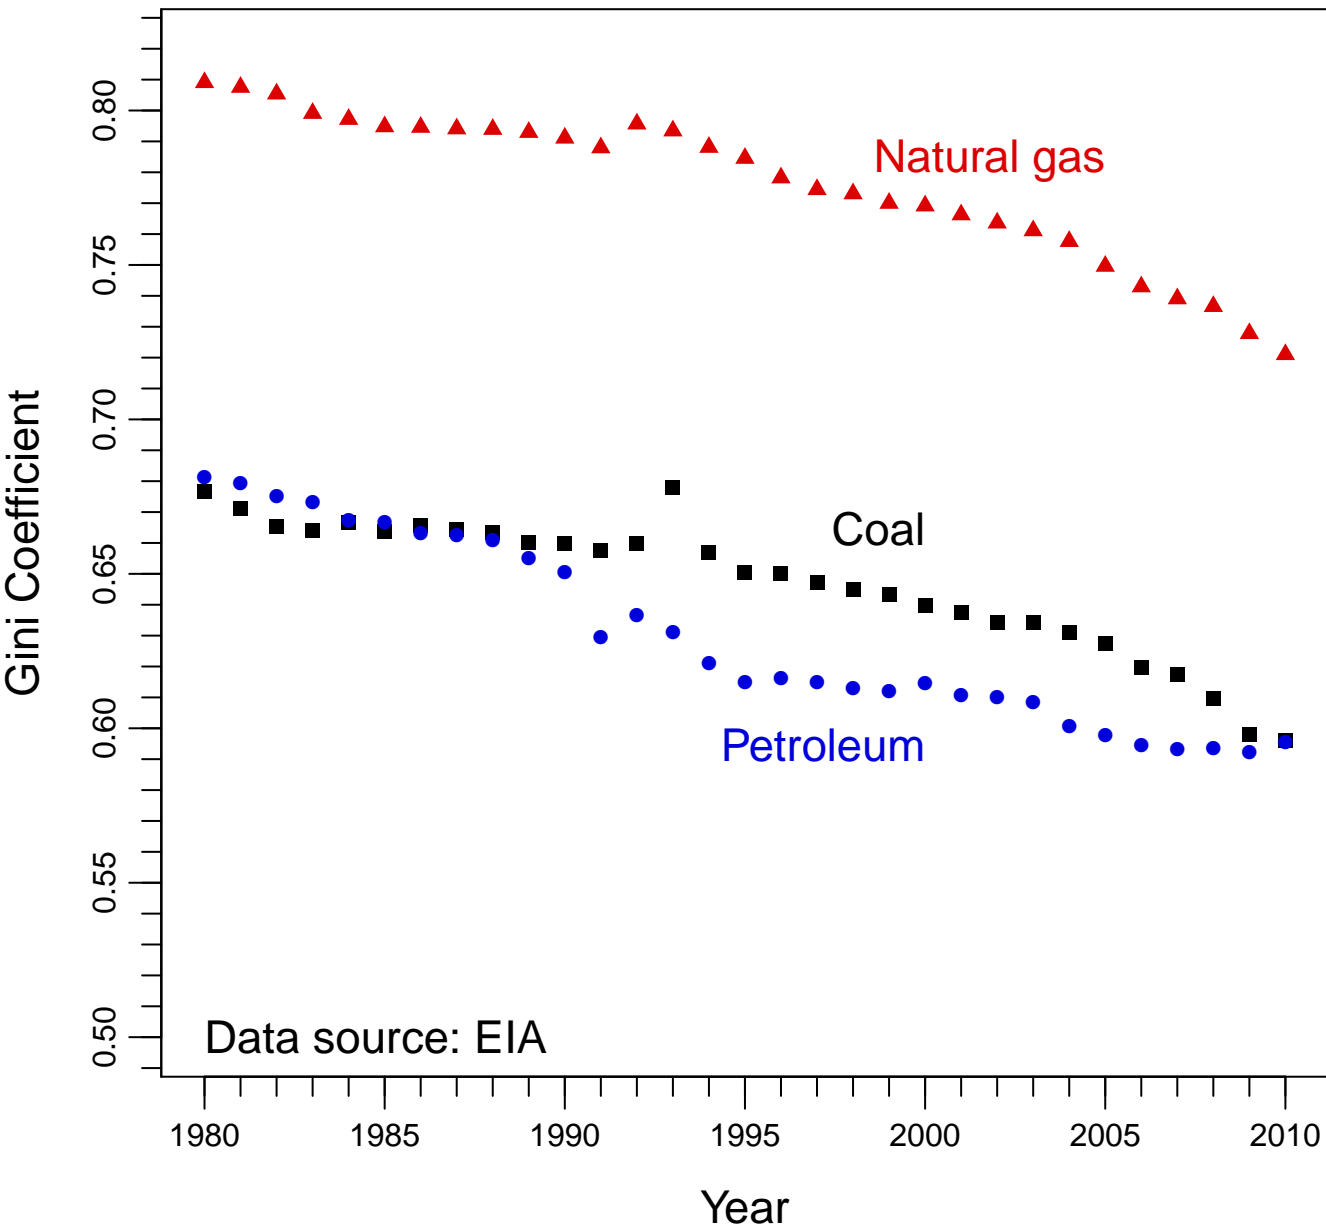

Supplement: s2 [file s2 › Sources/Figure 8/Figure8.pdf]
